# Supplementary material for: Developing a cluster-based approach for deciphering complexity in individuals with neurodevelopmental differences
Source: Front Pediatr. 2023 Sep 18;11:1171920. doi: 10.3389/fped.2023.1171920 (PMC10543689; doi:10.3389/fped.2023.1171920)
Supplement: Supplementary file 1 [file Table1.xlsx]

## Sheet: ID_GDD_gene_list_resources
Gene_Name	ensembl_gene_id	chromosome_name	Sources	Nb_sources
A2ML1	ENSG00000166535	12	Vissers_LE_(2016)_Nat_Rev_Genet;Opentarget_textMining;SysID_candidate_ID_genes	3
AAAS	ENSG00000094914	12	DDG2P;DisGenNet;HPO;Ilyas_M_(2020)_F1000Res;Phenolyser;Radboudumc_:_Exome_panels;SysID_candidate_ID_genes	7
AAR2	ENSG00000131043	20	DisGenNet;Opentarget_genetic_association;Opentarget_textMining	3
AARS1	ENSG00000090861	16	DisGenNet;HPO;Opentarget_textMining;Radboudumc_:_Exome_panels;SysID_primary_ID_genes	5
AASS	ENSG00000008311	7	DDG2P;DisGenNet;HPO;Ilyas_M_(2020)_F1000Res;Opentarget_textMining;Phenolyser;Radboudumc_:_Exome_panels;SysID_candidate_ID_genes	8
ABAT	ENSG00000183044	16	DisGenNet;HPO;Opentarget_genetic_association;Opentarget_textMining;Phenolyser	5
ABCA2	ENSG00000107331	9	DisGenNet;HPO;IPA;OMIM-2022-12-09;Opentarget_textMining;Orphanet;Radboudumc_:_Exome_panels;SysID_primary_ID_genes	8
ABCA4	ENSG00000198691	1	DisGenNet;HPO;IPA;Phenolyser	4
ABCA7	ENSG00000064687	19	DisGenNet;HPO;Phenolyser	3
ABCB7	ENSG00000131269	X	DisGenNet;HPO;Phenolyser	3
ABCC8	ENSG00000006071	11	DisGenNet;HPO;Phenolyser;Radboudumc_:_Exome_panels;SysID_candidate_ID_genes	5
ABCC9	ENSG00000069431	12	DDG2P;DisGenNet;HPO;IPA;Ilyas_M_(2020)_F1000Res;Vissers_LE_(2016)_Nat_Rev_Genet;OMIM-2022-12-09;Opentarget_textMining;Phenolyser;Radboudumc_:_Exome_panels;SysID_primary_ID_genes	11
ABCD1	ENSG00000101986	X	Fulgent_:_gene_panel;HPO;IPA;Ilyas_M_(2020)_F1000Res;Vissers_LE_(2016)_Nat_Rev_Genet;Opentarget_genetic_association;Phenolyser;Radboudumc_:_Exome_panels;SysID_primary_ID_genes	9
ABCD4	ENSG00000119688	14	Ilyas_M_(2020)_F1000Res;Vissers_LE_(2016)_Nat_Rev_Genet;Phenolyser;Radboudumc_:_Exome_panels;SysID_primary_ID_genes	5
ABHD16A	ENSG00000204427	6	DDG2P;HPO;Opentarget_genetic_association;Radboudumc_:_Exome_panels;SysID_primary_ID_genes	5
ABHD5	ENSG00000011198	3	DDG2P;DisGenNet;HPO;Ilyas_M_(2020)_F1000Res;Vissers_LE_(2016)_Nat_Rev_Genet;Phenolyser;Radboudumc_:_Exome_panels;SysID_primary_ID_genes	8
ACAD9	ENSG00000177646	3	Ilyas_M_(2020)_F1000Res;Vissers_LE_(2016)_Nat_Rev_Genet;Opentarget_textMining;Radboudumc_:_Exome_panels;SysID_primary_ID_genes	5
ACADM	ENSG00000117054	1	DDG2P;DisGenNet;HPO;Phenolyser	4
ACADS	ENSG00000122971	12	DDG2P;DisGenNet;HPO;Opentarget_textMining;Phenolyser	5
ACADSB	ENSG00000196177	10	DisGenNet;HPO;Opentarget_textMining;Phenolyser	4
ACAT1	ENSG00000075239	11	DDG2P;DisGenNet;Fulgent_:_gene_panel;HPO;Ilyas_M_(2020)_F1000Res;Phenolyser;Radboudumc_:_Exome_panels;SysID_candidate_ID_genes	8
ACAT2	ENSG00000120437	6	DisGenNet;HPO;Phenolyser	3
ACBD6	ENSG00000230124	1	DisGenNet;IPA;Ilyas_M_(2020)_F1000Res;Opentarget_genetic_association;Opentarget_textMining;SysID_candidate_ID_genes	6
ACD	ENSG00000102977	16	DisGenNet;HPO;Phenolyser	3
ACER3	ENSG00000078124	11	DisGenNet;HPO;Phenolyser;SysID_candidate_ID_genes	4
ACHE	ENSG00000087085	7	DisGenNet;IPA;SysID_candidate_ID_genes	3
ACO2	ENSG00000100412	22	DDG2P;DisGenNet;HPO;Ilyas_M_(2020)_F1000Res;Vissers_LE_(2016)_Nat_Rev_Genet;Opentarget_textMining;Phenolyser;Radboudumc_:_Exome_panels;SysID_primary_ID_genes	9
ACOX1	ENSG00000161533	17	DDG2P;DisGenNet;Fulgent_:_gene_panel;HPO;Ilyas_M_(2020)_F1000Res;Vissers_LE_(2016)_Nat_Rev_Genet;Phenolyser;Radboudumc_:_Exome_panels;SysID_primary_ID_genes	9
ACOX2	ENSG00000168306	3	DisGenNet;HPO;Phenolyser;SysID_candidate_ID_genes	4
ACP5	ENSG00000102575	19	HPO;Ilyas_M_(2020)_F1000Res;Phenolyser;SysID_candidate_ID_genes	4
ACSF3	ENSG00000176715	16	Ilyas_M_(2020)_F1000Res;Vissers_LE_(2016)_Nat_Rev_Genet;Opentarget_textMining;Radboudumc_:_Exome_panels;SysID_primary_ID_genes	5
ACSL4	ENSG00000068366	X	DDG2P;DisGenNet;Fulgent_:_gene_panel;HPO;IPA;Ilyas_M_(2020)_F1000Res;Vissers_LE_(2016)_Nat_Rev_Genet;OMIM-2022-12-09;Opentarget_genetic_association;Opentarget_textMining;Orphanet;Phenolyser;Radboudumc_:_Exome_panels;SysID_primary_ID_genes	14
ACTA1	ENSG00000143632	1	DisGenNet;HPO;Phenolyser	3
ACTA2	ENSG00000107796	10	DisGenNet;HPO;Ilyas_M_(2020)_F1000Res;Phenolyser;SysID_candidate_ID_genes	5
ACTB	ENSG00000075624	7	DDG2P;DisGenNet;Fulgent_:_gene_panel;HPO;IPA;Ilyas_M_(2020)_F1000Res;Vissers_LE_(2016)_Nat_Rev_Genet;Opentarget_genetic_association;Opentarget_textMining;Phenolyser;Radboudumc_:_Exome_panels;SysID_primary_ID_genes	12
ACTG1	ENSG00000184009	17	DisGenNet;Fulgent_:_gene_panel;HPO;Ilyas_M_(2020)_F1000Res;Vissers_LE_(2016)_Nat_Rev_Genet;Opentarget_genetic_association;Opentarget_textMining;Phenolyser;Radboudumc_:_Exome_panels;SysID_primary_ID_genes	10
ACTL6A	ENSG00000136518	3	DisGenNet;HPO;Ilyas_M_(2020)_F1000Res;Opentarget_genetic_association;Opentarget_textMining;Orphanet;Radboudumc_:_Exome_panels;SysID_primary_ID_genes	8
ACTL6B	ENSG00000077080	7	DisGenNet;HPO;IPA;OMIM-2022-12-09;Opentarget_genetic_association;Opentarget_textMining;Orphanet;Radboudumc_:_Exome_panels;SysID_primary_ID_genes	9
ACVR1	ENSG00000115170	2	DDG2P;DisGenNet;HPO;Ilyas_M_(2020)_F1000Res;Vissers_LE_(2016)_Nat_Rev_Genet;Phenolyser;Radboudumc_:_Exome_panels;SysID_primary_ID_genes	8
ACY1	ENSG00000243989	3	DisGenNet;Fulgent_:_gene_panel;Ilyas_M_(2020)_F1000Res;Vissers_LE_(2016)_Nat_Rev_Genet;Opentarget_genetic_association;Opentarget_textMining;Radboudumc_:_Exome_panels;SysID_primary_ID_genes	8
ADA	ENSG00000196839	20	DisGenNet;Ilyas_M_(2020)_F1000Res;Opentarget_textMining;Phenolyser	4
ADAM22	ENSG00000008277	7	HPO;Opentarget_genetic_association;Phenolyser;Radboudumc_:_Exome_panels;SysID_candidate_ID_genes	5
ADAMTS10	ENSG00000142303	19	DisGenNet;HPO;Phenolyser	3
ADAMTS3	ENSG00000156140	4	DisGenNet;HPO;Phenolyser	3
ADAMTSL2	ENSG00000197859	9	DisGenNet;HPO;Phenolyser	3
ADAR	ENSG00000160710	1	DisGenNet;Fulgent_:_gene_panel;HPO;Ilyas_M_(2020)_F1000Res;Vissers_LE_(2016)_Nat_Rev_Genet;Phenolyser;Radboudumc_:_Exome_panels;SysID_primary_ID_genes	8
ADARB1	ENSG00000197381	21	DDG2P;HPO;IPA;Opentarget_textMining;Radboudumc_:_Exome_panels;SysID_primary_ID_genes	6
ADAT3	ENSG00000213638	19	DisGenNet;HPO;IPA;Ilyas_M_(2020)_F1000Res;Vissers_LE_(2016)_Nat_Rev_Genet;Opentarget_genetic_association;Opentarget_textMining;Orphanet;Phenolyser;Radboudumc_:_Exome_panels;SysID_primary_ID_genes	11
ADCY5	ENSG00000173175	3	HPO;Ilyas_M_(2020)_F1000Res;SysID_candidate_ID_genes	3
ADD3	ENSG00000148700	10	DisGenNet;Opentarget_textMining;Radboudumc_:_Exome_panels;SysID_primary_ID_genes	4
ADGRB3	ENSG00000135298	6	DisGenNet;Opentarget_textMining;SysID_candidate_ID_genes	3
ADGRG1	ENSG00000205336	16	DDG2P;DisGenNet;HPO;Ilyas_M_(2020)_F1000Res;Opentarget_genetic_association;Radboudumc_:_Exome_panels;SysID_primary_ID_genes	7
ADGRG6	ENSG00000112414	6	DisGenNet;Ilyas_M_(2020)_F1000Res;Opentarget_textMining;SysID_candidate_ID_genes	4
ADGRL1	ENSG00000072071	19	Opentarget_genetic_association;Orphanet;SysID_candidate_ID_genes	3
ADK	ENSG00000156110	10	DisGenNet;IPA;Ilyas_M_(2020)_F1000Res;Vissers_LE_(2016)_Nat_Rev_Genet;Opentarget_textMining;Phenolyser;Radboudumc_:_Exome_panels;SysID_primary_ID_genes	8
ADNP	ENSG00000101126	20	AutDB;DisGenNet;Fulgent_:_gene_panel;HPO;IPA;Coe_B.P_(2019)_Nat_Genet;Ilyas_M_(2020)_F1000Res;Vissers_LE_(2016)_Nat_Rev_Genet;Opentarget_genetic_association;Opentarget_textMining;Phenolyser;Radboudumc_:_Exome_panels;SysID_primary_ID_genes	13
ADPRS	ENSG00000116863	1	DisGenNet;Radboudumc_:_Exome_panels;SysID_primary_ID_genes	3
ADRA2B	ENSG00000274286	2	DisGenNet;HPO;IPA;Ilyas_M_(2020)_F1000Res;Phenolyser;SysID_candidate_ID_genes	6
ADSL	ENSG00000239900	22	DDG2P;DisGenNet;Fulgent_:_gene_panel;HPO;Ilyas_M_(2020)_F1000Res;Vissers_LE_(2016)_Nat_Rev_Genet;Opentarget_genetic_association;Opentarget_textMining;Phenolyser;Radboudumc_:_Exome_panels;SysID_primary_ID_genes	11
AFF2	ENSG00000155966	X	DDG2P;DisGenNet;Fulgent_:_gene_panel;HPO;IPA;Ilyas_M_(2020)_F1000Res;Vissers_LE_(2016)_Nat_Rev_Genet;OMIM-2022-12-09;Opentarget_genetic_association;Opentarget_textMining;Orphanet;Phenolyser;Radboudumc_:_Exome_panels;SysID_primary_ID_genes	14
AFF3	ENSG00000144218	2	DDG2P;DisGenNet;HPO;Opentarget_textMining;Radboudumc_:_Exome_panels;SysID_candidate_ID_genes	6
AFF4	ENSG00000072364	5	DisGenNet;HPO;Ilyas_M_(2020)_F1000Res;Opentarget_textMining;Phenolyser;Radboudumc_:_Exome_panels;SysID_primary_ID_genes	7
AFG3L2	ENSG00000141385	18	DisGenNet;HPO;Ilyas_M_(2020)_F1000Res;Opentarget_genetic_association;Opentarget_textMining;Phenolyser;Radboudumc_:_Exome_panels;SysID_candidate_ID_genes	8
AGA	ENSG00000038002	4	DDG2P;DisGenNet;HPO;IPA;Ilyas_M_(2020)_F1000Res;Vissers_LE_(2016)_Nat_Rev_Genet;Opentarget_genetic_association;Opentarget_textMining;Phenolyser;Radboudumc_:_Exome_panels;SysID_primary_ID_genes	11
AGAP1	ENSG00000157985	2	DisGenNet;Opentarget_textMining;Radboudumc_:_Exome_panels;SysID_candidate_ID_genes	4
AGBL5	ENSG00000084693	2	DisGenNet;HPO;Phenolyser	3
AGFG1	ENSG00000173744	2	DisGenNet;IPA;Opentarget_textMining	3
AGGF1	ENSG00000164252	5	DisGenNet;HPO;Phenolyser	3
AGL	ENSG00000162688	1	DisGenNet;HPO;Ilyas_M_(2020)_F1000Res;Phenolyser	4
AGMO	ENSG00000187546	7	DisGenNet;Opentarget_genetic_association;Opentarget_textMining;Radboudumc_:_Exome_panels;SysID_primary_ID_genes	5
AGO1	ENSG00000092847	1	DisGenNet;Opentarget_genetic_association;Opentarget_textMining;Radboudumc_:_Exome_panels;SysID_primary_ID_genes	5
AGO2	ENSG00000123908	8	HPO;IPA;Opentarget_genetic_association;Orphanet;Radboudumc_:_Exome_panels;SysID_primary_ID_genes	6
AGPAT2	ENSG00000169692	9	DisGenNet;HPO;Ilyas_M_(2020)_F1000Res;Vissers_LE_(2016)_Nat_Rev_Genet;Opentarget_textMining;Phenolyser;SysID_primary_ID_genes	7
AGRN	ENSG00000188157	1	DisGenNet;HPO;Opentarget_textMining;Phenolyser	4
AGTPBP1	ENSG00000135049	9	DisGenNet;HPO;Opentarget_genetic_association	3
AGTR2	ENSG00000180772	X	DisGenNet;Fulgent_:_gene_panel;HPO;Vissers_LE_(2016)_Nat_Rev_Genet;Opentarget_textMining;Orphanet;Phenolyser;SysID_candidate_ID_genes	8
AHCY	ENSG00000101444	20	DisGenNet;HPO;Ilyas_M_(2020)_F1000Res;Vissers_LE_(2016)_Nat_Rev_Genet;Phenolyser;Radboudumc_:_Exome_panels;SysID_primary_ID_genes	7
AHDC1	ENSG00000126705	1	DisGenNet;Fulgent_:_gene_panel;HPO;IPA;Coe_B.P_(2019)_Nat_Genet;Ilyas_M_(2020)_F1000Res;Vissers_LE_(2016)_Nat_Rev_Genet;Opentarget_genetic_association;Opentarget_textMining;Orphanet;Phenolyser;Radboudumc_:_Exome_panels;SysID_primary_ID_genes	13
AHI1	ENSG00000135541	6	DDG2P;DisGenNet;Fulgent_:_gene_panel;HPO;IPA;Ilyas_M_(2020)_F1000Res;Vissers_LE_(2016)_Nat_Rev_Genet;Opentarget_genetic_association;Phenolyser;Radboudumc_:_Exome_panels;SysID_primary_ID_genes	11
AHR	ENSG00000106546	7	DisGenNet;HPO;Phenolyser	3
AHSG	ENSG00000145192	3	DisGenNet;HPO;IPA;OMIM-2022-12-09;Opentarget_textMining;Orphanet;Phenolyser;Radboudumc_:_Exome_panels;SysID_candidate_ID_genes	9
AIFM1	ENSG00000156709	X	DisGenNet;Fulgent_:_gene_panel;HPO;Ilyas_M_(2020)_F1000Res;Vissers_LE_(2016)_Nat_Rev_Genet;Opentarget_genetic_association;Opentarget_textMining;Phenolyser;Radboudumc_:_Exome_panels;SysID_primary_ID_genes	10
AIMP1	ENSG00000164022	4	DisGenNet;HPO;Ilyas_M_(2020)_F1000Res;Vissers_LE_(2016)_Nat_Rev_Genet;Opentarget_textMining;Orphanet;Radboudumc_:_Exome_panels;SysID_primary_ID_genes	8
AIMP2	ENSG00000106305	7	HPO;Phenolyser;Radboudumc_:_Exome_panels;SysID_primary_ID_genes	4
AIPL1	ENSG00000129221	17	DisGenNet;HPO;Ilyas_M_(2020)_F1000Res;Opentarget_textMining;Phenolyser	5
AK1	ENSG00000106992	9	Ilyas_M_(2020)_F1000Res;Vissers_LE_(2016)_Nat_Rev_Genet;SysID_primary_ID_genes	3
AKAP6	ENSG00000151320	14	DisGenNet;IPA;Opentarget_genetic_association;Opentarget_textMining;SysID_candidate_ID_genes	5
AKT1	ENSG00000142208	14	DDG2P;DisGenNet;HPO;IPA;Ilyas_M_(2020)_F1000Res;Opentarget_textMining;Phenolyser	7
AKT3	ENSG00000117020	1	DDG2P;DisGenNet;HPO;Ilyas_M_(2020)_F1000Res;Vissers_LE_(2016)_Nat_Rev_Genet;Opentarget_textMining;Phenolyser;Radboudumc_:_Exome_panels;SysID_primary_ID_genes	9
ALB	ENSG00000163631	4	DisGenNet;HPO;Opentarget_textMining	3
ALDH18A1	ENSG00000059573	10	DDG2P;DisGenNet;Fulgent_:_gene_panel;HPO;IPA;Ilyas_M_(2020)_F1000Res;Vissers_LE_(2016)_Nat_Rev_Genet;Opentarget_genetic_association;Phenolyser;Radboudumc_:_Exome_panels;SysID_primary_ID_genes	11
ALDH1A3	ENSG00000184254	15	IPA;Opentarget_textMining;SysID_candidate_ID_genes	3
ALDH3A2	ENSG00000072210	17	DDG2P;DisGenNet;HPO;Ilyas_M_(2020)_F1000Res;Vissers_LE_(2016)_Nat_Rev_Genet;Opentarget_textMining;Phenolyser;Radboudumc_:_Exome_panels;SysID_primary_ID_genes	9
ALDH4A1	ENSG00000159423	1	DDG2P;DisGenNet;Fulgent_:_gene_panel;HPO;IPA;Ilyas_M_(2020)_F1000Res;Vissers_LE_(2016)_Nat_Rev_Genet;Opentarget_genetic_association;Phenolyser;Radboudumc_:_Exome_panels;SysID_candidate_ID_genes	11
ALDH5A1	ENSG00000112294	6	DDG2P;DisGenNet;Fulgent_:_gene_panel;HPO;IPA;Ilyas_M_(2020)_F1000Res;Vissers_LE_(2016)_Nat_Rev_Genet;Opentarget_genetic_association;Opentarget_textMining;Phenolyser;Radboudumc_:_Exome_panels;SysID_primary_ID_genes	12
ALDH6A1	ENSG00000119711	14	DisGenNet;HPO;Opentarget_textMining;Phenolyser	4
ALDH7A1	ENSG00000164904	5	DDG2P;DisGenNet;HPO;IPA;Ilyas_M_(2020)_F1000Res;Opentarget_genetic_association;Phenolyser;Radboudumc_:_Exome_panels;SysID_primary_ID_genes	9
ALDOA	ENSG00000149925	16	DDG2P;HPO;Ilyas_M_(2020)_F1000Res;Opentarget_textMining;Phenolyser;SysID_candidate_ID_genes	6
ALDOB	ENSG00000136872	9	DisGenNet;HPO;Ilyas_M_(2020)_F1000Res;Phenolyser	4
ALG1	ENSG00000033011	16	Fulgent_:_gene_panel;HPO;Ilyas_M_(2020)_F1000Res;Vissers_LE_(2016)_Nat_Rev_Genet;Opentarget_genetic_association;Phenolyser;Radboudumc_:_Exome_panels;SysID_primary_ID_genes	8
ALG11	ENSG00000253710	13	DisGenNet;Fulgent_:_gene_panel;HPO;Ilyas_M_(2020)_F1000Res;Phenolyser;Radboudumc_:_Exome_panels;SysID_primary_ID_genes	7
ALG12	ENSG00000182858	22	Fulgent_:_gene_panel;HPO;Ilyas_M_(2020)_F1000Res;Vissers_LE_(2016)_Nat_Rev_Genet;Opentarget_textMining;Phenolyser;Radboudumc_:_Exome_panels;SysID_primary_ID_genes	8
ALG13	ENSG00000101901	X	DisGenNet;Fulgent_:_gene_panel;HPO;IPA;Ilyas_M_(2020)_F1000Res;Vissers_LE_(2016)_Nat_Rev_Genet;Opentarget_genetic_association;Opentarget_textMining;Orphanet;Phenolyser;Radboudumc_:_Exome_panels;SysID_primary_ID_genes	12
ALG14	ENSG00000172339	1	DisGenNet;HPO;IPA;OMIM-2022-12-09;Opentarget_genetic_association;Opentarget_textMining;Radboudumc_:_Exome_panels;SysID_candidate_ID_genes	8
ALG2	ENSG00000119523	9	DisGenNet;Fulgent_:_gene_panel;HPO;Ilyas_M_(2020)_F1000Res;Vissers_LE_(2016)_Nat_Rev_Genet;Phenolyser;Radboudumc_:_Exome_panels;SysID_primary_ID_genes	8
ALG3	ENSG00000214160	3	Fulgent_:_gene_panel;IPA;Ilyas_M_(2020)_F1000Res;Vissers_LE_(2016)_Nat_Rev_Genet;Opentarget_genetic_association;Phenolyser;Radboudumc_:_Exome_panels;SysID_primary_ID_genes	8
ALG6	ENSG00000088035	1	Fulgent_:_gene_panel;Ilyas_M_(2020)_F1000Res;Vissers_LE_(2016)_Nat_Rev_Genet;Phenolyser;Radboudumc_:_Exome_panels;SysID_primary_ID_genes	6
ALG8	ENSG00000159063	11	Ilyas_M_(2020)_F1000Res;Phenolyser;Radboudumc_:_Exome_panels;SysID_candidate_ID_genes	4
ALG9	ENSG00000086848	11	DisGenNet;HPO;Ilyas_M_(2020)_F1000Res;Vissers_LE_(2016)_Nat_Rev_Genet;Phenolyser;Radboudumc_:_Exome_panels;SysID_primary_ID_genes	7
ALKBH8	ENSG00000137760	11	DDG2P;DisGenNet;HPO;IPA;OMIM-2022-12-09;Opentarget_textMining;Orphanet;Radboudumc_:_Exome_panels;SysID_primary_ID_genes	9
ALMS1	ENSG00000116127	2	DisGenNet;IPA;Ilyas_M_(2020)_F1000Res;Opentarget_genetic_association;Phenolyser;Radboudumc_:_Exome_panels;SysID_candidate_ID_genes	7
ALOX12B	ENSG00000179477	17	DisGenNet;HPO;Phenolyser	3
ALOXE3	ENSG00000179148	17	DisGenNet;HPO;Opentarget_genetic_association;Phenolyser	4
ALX1	ENSG00000180318	12	DDG2P;DisGenNet;HPO;Vissers_LE_(2016)_Nat_Rev_Genet;Opentarget_textMining;Phenolyser	6
ALX3	ENSG00000156150	1	DDG2P;DisGenNet;HPO;Ilyas_M_(2020)_F1000Res;Phenolyser;Radboudumc_:_Exome_panels	6
ALX4	ENSG00000052850	11	DisGenNet;Fulgent_:_gene_panel;HPO;Ilyas_M_(2020)_F1000Res;Vissers_LE_(2016)_Nat_Rev_Genet;Phenolyser;Radboudumc_:_Exome_panels;SysID_candidate_ID_genes	8
AMER1	ENSG00000184675	X	DDG2P;DisGenNet;Fulgent_:_gene_panel;HPO;Ilyas_M_(2020)_F1000Res;Phenolyser;Radboudumc_:_Exome_panels;SysID_primary_ID_genes	8
AMMEC	0	0	DisGenNet;OMIM-2022-12-09;Phenolyser	3
AMMECR1	ENSG00000101935	X	DisGenNet;HPO;OMIM-2022-12-09;Opentarget_textMining;Orphanet;Phenolyser;Radboudumc_:_Exome_panels;SysID_candidate_ID_genes	8
AMPD2	ENSG00000116337	1	IPA;Ilyas_M_(2020)_F1000Res;Vissers_LE_(2016)_Nat_Rev_Genet;Opentarget_genetic_association;Radboudumc_:_Exome_panels;SysID_primary_ID_genes	6
AMT	ENSG00000145020	3	DDG2P;DisGenNet;HPO;Ilyas_M_(2020)_F1000Res;Vissers_LE_(2016)_Nat_Rev_Genet;Phenolyser;Radboudumc_:_Exome_panels;SysID_primary_ID_genes	8
ANK1	ENSG00000029534	8	DisGenNet;HPO;IPA;Opentarget_textMining;Phenolyser	5
ANK2	ENSG00000145362	4	IPA;Opentarget_genetic_association;Opentarget_textMining;Radboudumc_:_Exome_panels;SysID_candidate_ID_genes	5
ANK3	ENSG00000151150	10	DisGenNet;Fulgent_:_gene_panel;HPO;IPA;Ilyas_M_(2020)_F1000Res;Vissers_LE_(2016)_Nat_Rev_Genet;OMIM-2022-12-09;Opentarget_genetic_association;Opentarget_textMining;Orphanet;Phenolyser;Radboudumc_:_Exome_panels;SysID_primary_ID_genes	13
ANKH	ENSG00000154122	5	IPA;Ilyas_M_(2020)_F1000Res;Vissers_LE_(2016)_Nat_Rev_Genet;Opentarget_genetic_association;Opentarget_textMining;Radboudumc_:_Exome_panels;SysID_primary_ID_genes	7
ANKLE2	ENSG00000176915	12	DisGenNet;HPO;Opentarget_genetic_association;Phenolyser;Radboudumc_:_Exome_panels;SysID_candidate_ID_genes	6
ANKRD11	ENSG00000167522	16	DDG2P;DisGenNet;Fulgent_:_gene_panel;HPO;IPA;Coe_B.P_(2019)_Nat_Genet;Ilyas_M_(2020)_F1000Res;Vissers_LE_(2016)_Nat_Rev_Genet;Opentarget_genetic_association;Opentarget_textMining;Phenolyser;Radboudumc_:_Exome_panels;SysID_primary_ID_genes	13
ANKRD17	ENSG00000132466	4	HPO;IPA;Opentarget_genetic_association;Opentarget_textMining;Orphanet;Radboudumc_:_Exome_panels;SysID_primary_ID_genes	7
ANO10	ENSG00000160746	3	DisGenNet;HPO;Ilyas_M_(2020)_F1000Res;Vissers_LE_(2016)_Nat_Rev_Genet;Opentarget_textMining;Phenolyser;Radboudumc_:_Exome_panels;SysID_primary_ID_genes	8
ANO5	ENSG00000171714	11	Ilyas_M_(2020)_F1000Res;Opentarget_genetic_association;SysID_candidate_ID_genes	3
ANTXR1	ENSG00000169604	2	HPO;Ilyas_M_(2020)_F1000Res;Vissers_LE_(2016)_Nat_Rev_Genet;Phenolyser;Radboudumc_:_Exome_panels	5
AP1B1	ENSG00000100280	22	DisGenNet;HPO;Opentarget_genetic_association;SysID_primary_ID_genes	4
AP1G1	ENSG00000166747	16	DDG2P;HPO;Opentarget_genetic_association;Orphanet;Radboudumc_:_Exome_panels;SysID_primary_ID_genes	6
AP1S1	ENSG00000106367	7	DisGenNet;Fulgent_:_gene_panel;HPO;Ilyas_M_(2020)_F1000Res;Opentarget_textMining;Phenolyser;Radboudumc_:_Exome_panels;SysID_primary_ID_genes	8
AP1S2	ENSG00000182287	X	DisGenNet;Fulgent_:_gene_panel;HPO;IPA;Ilyas_M_(2020)_F1000Res;Vissers_LE_(2016)_Nat_Rev_Genet;Opentarget_textMining;Orphanet;Phenolyser;Radboudumc_:_Exome_panels;SysID_primary_ID_genes	11
AP2M1	ENSG00000161203	3	DisGenNet;HPO;IPA;OMIM-2022-12-09;Opentarget_genetic_association;Radboudumc_:_Exome_panels;SysID_primary_ID_genes	7
AP2S1	ENSG00000042753	19	Opentarget_textMining;Radboudumc_:_Exome_panels;SysID_candidate_ID_genes	3
AP3B1	ENSG00000132842	5	DisGenNet;Fulgent_:_gene_panel;HPO;IPA;Ilyas_M_(2020)_F1000Res;Vissers_LE_(2016)_Nat_Rev_Genet;Opentarget_genetic_association;Phenolyser;Radboudumc_:_Exome_panels;SysID_primary_ID_genes	10
AP3B2	ENSG00000103723	15	DisGenNet;HPO;IPA;Ilyas_M_(2020)_F1000Res;Opentarget_genetic_association;Radboudumc_:_Exome_panels;SysID_primary_ID_genes	7
AP4B1	ENSG00000134262	1	DDG2P;DisGenNet;Fulgent_:_gene_panel;HPO;IPA;Ilyas_M_(2020)_F1000Res;Vissers_LE_(2016)_Nat_Rev_Genet;Opentarget_genetic_association;Opentarget_textMining;Orphanet;Phenolyser;Radboudumc_:_Exome_panels;SysID_primary_ID_genes	13
AP4E1	ENSG00000081014	15	DDG2P;DisGenNet;Fulgent_:_gene_panel;HPO;IPA;Ilyas_M_(2020)_F1000Res;Vissers_LE_(2016)_Nat_Rev_Genet;Opentarget_textMining;Orphanet;Phenolyser;Radboudumc_:_Exome_panels;SysID_primary_ID_genes	12
AP4M1	ENSG00000221838	7	DDG2P;DisGenNet;Fulgent_:_gene_panel;HPO;IPA;Ilyas_M_(2020)_F1000Res;Vissers_LE_(2016)_Nat_Rev_Genet;Opentarget_genetic_association;Opentarget_textMining;Orphanet;Phenolyser;Radboudumc_:_Exome_panels;SysID_primary_ID_genes	13
AP4S1	ENSG00000100478	14	DDG2P;DisGenNet;Fulgent_:_gene_panel;HPO;IPA;Ilyas_M_(2020)_F1000Res;Vissers_LE_(2016)_Nat_Rev_Genet;Opentarget_genetic_association;Opentarget_textMining;Orphanet;Phenolyser;Radboudumc_:_Exome_panels;SysID_primary_ID_genes	13
AP5Z1	ENSG00000242802	7	DisGenNet;HPO;Opentarget_textMining;Phenolyser	4
APBA2	ENSG00000034053	15	IPA;Opentarget_textMining;SysID_candidate_ID_genes	3
APC	ENSG00000134982	5	DisGenNet;HPO;Opentarget_textMining;Phenolyser	4
APC2	ENSG00000115266	19	DisGenNet;HPO;IPA;OMIM-2022-12-09;Phenolyser;Radboudumc_:_Exome_panels;SysID_primary_ID_genes	7
APOE	ENSG00000130203	19	DisGenNet;Opentarget_textMining;Phenolyser	3
APP	ENSG00000142192	21	DisGenNet;HPO;IPA;Opentarget_textMining;Phenolyser;SysID_candidate_ID_genes	6
APTX	ENSG00000137074	9	Ilyas_M_(2020)_F1000Res;Vissers_LE_(2016)_Nat_Rev_Genet;Radboudumc_:_Exome_panels;SysID_primary_ID_genes	4
AQP2	ENSG00000167580	12	DisGenNet;HPO;Phenolyser	3
AQP4	ENSG00000171885	18	DisGenNet;IPA;Opentarget_genetic_association;Opentarget_textMining;SysID_candidate_ID_genes	5
AR	ENSG00000169083	X	DisGenNet;Fulgent_:_gene_panel;Opentarget_textMining	3
ARCN1	ENSG00000095139	11	DDG2P;DisGenNet;HPO;Ilyas_M_(2020)_F1000Res;Phenolyser;Radboudumc_:_Exome_panels;SysID_primary_ID_genes	7
ARF1	ENSG00000143761	1	Opentarget_textMining;Radboudumc_:_Exome_panels;SysID_primary_ID_genes	3
ARF3	ENSG00000134287	12	Opentarget_genetic_association;Orphanet;Radboudumc_:_Exome_panels;SysID_candidate_ID_genes	4
ARFGEF1	ENSG00000066777	8	DDG2P;Opentarget_genetic_association;Opentarget_textMining;Radboudumc_:_Exome_panels;SysID_primary_ID_genes	5
ARFGEF2	ENSG00000124198	20	DisGenNet;HPO;IPA;Ilyas_M_(2020)_F1000Res;Vissers_LE_(2016)_Nat_Rev_Genet;Opentarget_genetic_association;Opentarget_textMining;Phenolyser;Radboudumc_:_Exome_panels;SysID_primary_ID_genes	10
ARG1	ENSG00000118520	6	DDG2P;DisGenNet;Fulgent_:_gene_panel;HPO;IPA;Ilyas_M_(2020)_F1000Res;Vissers_LE_(2016)_Nat_Rev_Genet;Phenolyser;Radboudumc_:_Exome_panels;SysID_candidate_ID_genes	10
ARHGAP31	ENSG00000031081	3	DDG2P;DisGenNet;HPO;Phenolyser;Radboudumc_:_Exome_panels;SysID_candidate_ID_genes	6
ARHGDIA	ENSG00000141522	17	DisGenNet;HPO;Phenolyser	3
ARHGEF18	ENSG00000104880	19	DisGenNet;HPO;Phenolyser	3
ARHGEF2	ENSG00000116584	1	DisGenNet;HPO;Opentarget_textMining;Phenolyser;SysID_candidate_ID_genes	5
ARHGEF6	ENSG00000129675	X	DDG2P;DisGenNet;Fulgent_:_gene_panel;HPO;IPA;Ilyas_M_(2020)_F1000Res;Vissers_LE_(2016)_Nat_Rev_Genet;Opentarget_genetic_association;Opentarget_textMining;Orphanet;Phenolyser;Radboudumc_:_Exome_panels;SysID_candidate_ID_genes	13
ARHGEF7	ENSG00000102606	13	DisGenNet;IPA;Opentarget_textMining	3
ARHGEF9	ENSG00000131089	X	DisGenNet;Fulgent_:_gene_panel;HPO;IPA;Coe_B.P_(2019)_Nat_Genet;Ilyas_M_(2020)_F1000Res;Vissers_LE_(2016)_Nat_Rev_Genet;Opentarget_genetic_association;Opentarget_textMining;Phenolyser;Radboudumc_:_Exome_panels;SysID_primary_ID_genes	12
ARID1A	ENSG00000117713	1	DDG2P;DisGenNet;Fulgent_:_gene_panel;HPO;IPA;Ilyas_M_(2020)_F1000Res;Vissers_LE_(2016)_Nat_Rev_Genet;Opentarget_genetic_association;Opentarget_textMining;Phenolyser;Radboudumc_:_Exome_panels;SysID_primary_ID_genes	12
ARID1B	ENSG00000049618	6	AutDB;DisGenNet;Fulgent_:_gene_panel;HPO;IPA;Coe_B.P_(2019)_Nat_Genet;Ilyas_M_(2020)_F1000Res;Vissers_LE_(2016)_Nat_Rev_Genet;Opentarget_genetic_association;Opentarget_textMining;Phenolyser;Radboudumc_:_Exome_panels;SysID_primary_ID_genes	13
ARID2	ENSG00000189079	12	DDG2P;DisGenNet;HPO;IPA;Coe_B.P_(2019)_Nat_Genet;Ilyas_M_(2020)_F1000Res;Opentarget_genetic_association;Opentarget_textMining;Phenolyser;Radboudumc_:_Exome_panels;SysID_primary_ID_genes	11
ARL13B	ENSG00000169379	3	DisGenNet;HPO;Ilyas_M_(2020)_F1000Res;Vissers_LE_(2016)_Nat_Rev_Genet;Opentarget_genetic_association;Phenolyser;Radboudumc_:_Exome_panels;SysID_primary_ID_genes	8
ARL14EP	ENSG00000152219	11	DisGenNet;IPA;Ilyas_M_(2020)_F1000Res;Opentarget_textMining;SysID_candidate_ID_genes	5
ARL2BP	ENSG00000102931	16	DisGenNet;HPO;Phenolyser	3
ARL3	ENSG00000138175	10	DisGenNet;HPO;SysID_primary_ID_genes	3
ARL6	ENSG00000113966	3	DDG2P;DisGenNet;HPO;Ilyas_M_(2020)_F1000Res;Vissers_LE_(2016)_Nat_Rev_Genet;Phenolyser;Radboudumc_:_Exome_panels;SysID_primary_ID_genes	8
ARMC9	ENSG00000135931	2	DDG2P;DisGenNet;HPO;Ilyas_M_(2020)_F1000Res;Opentarget_genetic_association;Opentarget_textMining;Phenolyser;Radboudumc_:_Exome_panels;SysID_primary_ID_genes	9
ARNT2	ENSG00000172379	15	DisGenNet;HPO;Opentarget_textMining;Phenolyser	4
ARSA	ENSG00000100299	22	DDG2P;DisGenNet;HPO;IPA;Ilyas_M_(2020)_F1000Res;Opentarget_genetic_association;Phenolyser;Radboudumc_:_Exome_panels;SysID_candidate_ID_genes	9
ARSL	ENSG00000157399	X	Opentarget_textMining;Radboudumc_:_Exome_panels;SysID_primary_ID_genes	3
ARV1	ENSG00000173409	1	DisGenNet;HPO;Ilyas_M_(2020)_F1000Res;Phenolyser;Radboudumc_:_Exome_panels;SysID_primary_ID_genes	6
ARVCF	ENSG00000099889	22	DisGenNet;HPO;Phenolyser	3
ARX	ENSG00000004848	X	DDG2P;DisGenNet;Fulgent_:_gene_panel;HPO;IPA;Ilyas_M_(2020)_F1000Res;Vissers_LE_(2016)_Nat_Rev_Genet;OMIM-2022-12-09;Opentarget_genetic_association;Opentarget_textMining;Orphanet;Phenolyser;Radboudumc_:_Exome_panels;SysID_primary_ID_genes	14
ASAH1	ENSG00000104763	8	DDG2P;DisGenNet;Fulgent_:_gene_panel;HPO;Ilyas_M_(2020)_F1000Res;Opentarget_genetic_association;Phenolyser;Radboudumc_:_Exome_panels;SysID_primary_ID_genes	9
ASCC1	ENSG00000138303	10	DisGenNet;HPO;Phenolyser	3
ASCC3	ENSG00000112249	6	DisGenNet;IPA;Ilyas_M_(2020)_F1000Res;SysID_candidate_ID_genes	4
ASCL1	ENSG00000139352	12	DisGenNet;HPO;IPA;Phenolyser;SysID_candidate_ID_genes	5
ASH1L	ENSG00000116539	1	DDG2P;DisGenNet;HPO;IPA;Ilyas_M_(2020)_F1000Res;OMIM-2022-12-09;Opentarget_genetic_association;Opentarget_textMining;Orphanet;Phenolyser;Radboudumc_:_Exome_panels;SysID_primary_ID_genes	12
ASL	ENSG00000126522	7	DDG2P;DisGenNet;HPO;Ilyas_M_(2020)_F1000Res;Vissers_LE_(2016)_Nat_Rev_Genet;Phenolyser;Radboudumc_:_Exome_panels;SysID_primary_ID_genes	8
ASNS	ENSG00000070669	7	Vissers_LE_(2016)_Nat_Rev_Genet;Opentarget_textMining;Radboudumc_:_Exome_panels;SysID_primary_ID_genes	4
ASPA	ENSG00000108381	17	DisGenNet;IPA;Ilyas_M_(2020)_F1000Res;Vissers_LE_(2016)_Nat_Rev_Genet;Opentarget_genetic_association;Phenolyser;Radboudumc_:_Exome_panels;SysID_primary_ID_genes	8
ASPM	ENSG00000066279	1	DDG2P;DisGenNet;Fulgent_:_gene_panel;HPO;IPA;Ilyas_M_(2020)_F1000Res;Vissers_LE_(2016)_Nat_Rev_Genet;Opentarget_genetic_association;Opentarget_textMining;Phenolyser;Radboudumc_:_Exome_panels;SysID_primary_ID_genes	12
ASS1	ENSG00000130707	9	DisGenNet;Fulgent_:_gene_panel;HPO;Ilyas_M_(2020)_F1000Res;Opentarget_genetic_association;Phenolyser;Radboudumc_:_Exome_panels;SysID_candidate_ID_genes	8
ASTN1	ENSG00000152092	1	DisGenNet;Opentarget_genetic_association;SysID_candidate_ID_genes	3
ASXL1	ENSG00000171456	20	DDG2P;DisGenNet;Fulgent_:_gene_panel;HPO;IPA;Coe_B.P_(2019)_Nat_Genet;Ilyas_M_(2020)_F1000Res;Vissers_LE_(2016)_Nat_Rev_Genet;Opentarget_genetic_association;Opentarget_textMining;Phenolyser;Radboudumc_:_Exome_panels;SysID_primary_ID_genes	13
ASXL2	ENSG00000143970	2	DisGenNet;HPO;Ilyas_M_(2020)_F1000Res;Opentarget_textMining;Phenolyser;Radboudumc_:_Exome_panels;SysID_primary_ID_genes	7
ASXL3	ENSG00000141431	18	DisGenNet;Fulgent_:_gene_panel;HPO;IPA;Coe_B.P_(2019)_Nat_Genet;Ilyas_M_(2020)_F1000Res;Vissers_LE_(2016)_Nat_Rev_Genet;Opentarget_genetic_association;Opentarget_textMining;Phenolyser;Radboudumc_:_Exome_panels;SysID_primary_ID_genes	12
ATAD1	ENSG00000138138	10	DisGenNet;HPO;Phenolyser;Radboudumc_:_Exome_panels;SysID_candidate_ID_genes	5
ATAD3A	ENSG00000197785	1	DisGenNet;HPO;Ilyas_M_(2020)_F1000Res;Phenolyser;Radboudumc_:_Exome_panels;SysID_primary_ID_genes	6
ATCAY	ENSG00000167654	19	DisGenNet;HPO;Phenolyser	3
ATG5	ENSG00000057663	6	DisGenNet;HPO;Opentarget_textMining;Phenolyser	4
ATG7	ENSG00000197548	3	DDG2P;IPA;Opentarget_textMining;SysID_primary_ID_genes	4
ATIC	ENSG00000138363	2	DDG2P;DisGenNet;HPO;Ilyas_M_(2020)_F1000Res;Vissers_LE_(2016)_Nat_Rev_Genet;Opentarget_genetic_association;Opentarget_textMining;Phenolyser;Radboudumc_:_Exome_panels;SysID_candidate_ID_genes	10
ATL1	ENSG00000198513	14	DisGenNet;Fulgent_:_gene_panel;HPO;Ilyas_M_(2020)_F1000Res;Phenolyser;Radboudumc_:_Exome_panels	6
ATM	ENSG00000149311	11	DisGenNet;Ilyas_M_(2020)_F1000Res;SysID_candidate_ID_genes	3
ATN1	ENSG00000111676	12	DisGenNet;HPO;IPA;Radboudumc_:_Exome_panels;SysID_primary_ID_genes	5
ATP10A	ENSG00000206190	15	Fulgent_:_gene_panel;IPA;Phenolyser	3
ATP13A2	ENSG00000159363	1	DisGenNet;Fulgent_:_gene_panel;HPO;Ilyas_M_(2020)_F1000Res;Opentarget_textMining;Phenolyser;Radboudumc_:_Exome_panels	7
ATP1A1	ENSG00000163399	1	DDG2P;DisGenNet;IPA;Ilyas_M_(2020)_F1000Res;OMIM-2022-12-09;Opentarget_genetic_association;Orphanet;Phenolyser;Radboudumc_:_Exome_panels;SysID_primary_ID_genes	10
ATP1A2	ENSG00000018625	1	DisGenNet;Fulgent_:_gene_panel;HPO;Ilyas_M_(2020)_F1000Res;Vissers_LE_(2016)_Nat_Rev_Genet;Phenolyser;Radboudumc_:_Exome_panels;SysID_primary_ID_genes	8
ATP1A3	ENSG00000105409	19	DDG2P;DisGenNet;HPO;Ilyas_M_(2020)_F1000Res;Opentarget_genetic_association;Opentarget_textMining;Phenolyser;Radboudumc_:_Exome_panels;SysID_primary_ID_genes	9
ATP2A2	ENSG00000174437	12	DisGenNet;HPO;Vissers_LE_(2016)_Nat_Rev_Genet;Opentarget_textMining;Phenolyser;Radboudumc_:_Exome_panels;SysID_primary_ID_genes	7
ATP2B1	ENSG00000070961	12	HPO;OMIM-2022-12-09;Orphanet	3
ATP5F1E	ENSG00000124172	20	DisGenNet;HPO;SysID_candidate_ID_genes	3
ATP6	ENSG00000198899	MT	0	0
ATP6AP1	ENSG00000071553	X	HPO;Phenolyser;Radboudumc_:_Exome_panels	3
ATP6AP2	ENSG00000182220	X	DDG2P;DisGenNet;Fulgent_:_gene_panel;HPO;IPA;Ilyas_M_(2020)_F1000Res;Vissers_LE_(2016)_Nat_Rev_Genet;OMIM-2022-12-09;Opentarget_textMining;Orphanet;Phenolyser;Radboudumc_:_Exome_panels;SysID_primary_ID_genes	13
ATP6V0A1	ENSG00000033627	17	HPO;Opentarget_genetic_association;Opentarget_textMining;Radboudumc_:_Exome_panels;SysID_primary_ID_genes	5
ATP6V0A2	ENSG00000185344	12	DisGenNet;HPO;Ilyas_M_(2020)_F1000Res;Vissers_LE_(2016)_Nat_Rev_Genet;Opentarget_textMining;Phenolyser;Radboudumc_:_Exome_panels;SysID_primary_ID_genes	8
ATP6V0C	ENSG00000185883	16	Opentarget_genetic_association;Opentarget_textMining;Radboudumc_:_Exome_panels;SysID_candidate_ID_genes	4
ATP6V1A	ENSG00000114573	3	DisGenNet;HPO;IPA;Ilyas_M_(2020)_F1000Res;Phenolyser;Radboudumc_:_Exome_panels;SysID_primary_ID_genes	7
ATP6V1B2	ENSG00000147416	8	DisGenNet;HPO;IPA;Ilyas_M_(2020)_F1000Res;Opentarget_textMining;Phenolyser;Radboudumc_:_Exome_panels;SysID_primary_ID_genes	8
ATP6V1E1	ENSG00000131100	22	DisGenNet;HPO;Phenolyser	3
ATP7A	ENSG00000165240	X	DDG2P;DisGenNet;Fulgent_:_gene_panel;HPO;IPA;Ilyas_M_(2020)_F1000Res;Vissers_LE_(2016)_Nat_Rev_Genet;Opentarget_genetic_association;Opentarget_textMining;Phenolyser;Radboudumc_:_Exome_panels;SysID_primary_ID_genes	12
ATP7B	ENSG00000123191	13	DisGenNet;HPO;Phenolyser	3
ATP8A2	ENSG00000132932	13	DisGenNet;HPO;IPA;Vissers_LE_(2016)_Nat_Rev_Genet;OMIM-2022-12-09;Opentarget_genetic_association;Opentarget_textMining;Phenolyser;Radboudumc_:_Exome_panels;SysID_primary_ID_genes	10
ATP9A	ENSG00000054793	20	Opentarget_genetic_association;Orphanet;Radboudumc_:_Exome_panels;SysID_primary_ID_genes	4
ATPAF2	ENSG00000171953	17	DisGenNet;HPO;Phenolyser	3
ATR	ENSG00000175054	3	DDG2P;DisGenNet;HPO;Ilyas_M_(2020)_F1000Res;Vissers_LE_(2016)_Nat_Rev_Genet;Phenolyser;Radboudumc_:_Exome_panels;SysID_primary_ID_genes	8
ATRIP	ENSG00000164053	3	DisGenNet;HPO;Phenolyser	3
ATRX	ENSG00000085224	X	DDG2P;DisGenNet;Fulgent_:_gene_panel;HPO;IPA;Ilyas_M_(2020)_F1000Res;Vissers_LE_(2016)_Nat_Rev_Genet;OMIM-2022-12-09;Opentarget_genetic_association;Opentarget_textMining;Orphanet;Phenolyser;Radboudumc_:_Exome_panels;SysID_primary_ID_genes	14
ATXN2L	ENSG00000168488	16	IPA;Opentarget_genetic_association;Radboudumc_:_Exome_panels;SysID_candidate_ID_genes	4
ATXN7	ENSG00000163635	3	DisGenNet;HPO;Phenolyser	3
AUH	ENSG00000148090	9	Fulgent_:_gene_panel;Ilyas_M_(2020)_F1000Res;Vissers_LE_(2016)_Nat_Rev_Genet;Radboudumc_:_Exome_panels;SysID_primary_ID_genes	5
AUTS2	ENSG00000158321	7	DDG2P;DisGenNet;Fulgent_:_gene_panel;HPO;IPA;Coe_B.P_(2019)_Nat_Genet;Ilyas_M_(2020)_F1000Res;Vissers_LE_(2016)_Nat_Rev_Genet;OMIM-2022-12-09;Opentarget_genetic_association;Opentarget_textMining;Phenolyser;Radboudumc_:_Exome_panels;SysID_primary_ID_genes	14
AVPR2	ENSG00000126895	X	DisGenNet;Fulgent_:_gene_panel;HPO;IPA;Opentarget_textMining;Phenolyser;Radboudumc_:_Exome_panels;SysID_candidate_ID_genes	8
B3GALNT2	ENSG00000162885	1	DisGenNet;HPO;IPA;Ilyas_M_(2020)_F1000Res;Opentarget_textMining;Orphanet;Phenolyser;Radboudumc_:_Exome_panels;SysID_primary_ID_genes	9
B3GALT6	ENSG00000176022	1	DisGenNet;HPO;Ilyas_M_(2020)_F1000Res;Opentarget_textMining;Phenolyser;Radboudumc_:_Exome_panels;SysID_primary_ID_genes	7
B3GALTL	ENSG00000187676	13	0	0
B3GLCT	ENSG00000187676	13	DisGenNet;HPO;IPA;Ilyas_M_(2020)_F1000Res;Radboudumc_:_Exome_panels;SysID_primary_ID_genes	6
B4GALNT1	ENSG00000135454	12	DisGenNet;HPO;Ilyas_M_(2020)_F1000Res;Opentarget_textMining;Phenolyser;Radboudumc_:_Exome_panels;SysID_primary_ID_genes	7
B4GALT1	ENSG00000086062	9	Ilyas_M_(2020)_F1000Res;Vissers_LE_(2016)_Nat_Rev_Genet;Phenolyser;Radboudumc_:_Exome_panels;SysID_primary_ID_genes	5
B4GALT7	ENSG00000027847	5	Ilyas_M_(2020)_F1000Res;Vissers_LE_(2016)_Nat_Rev_Genet;Opentarget_textMining;Radboudumc_:_Exome_panels;SysID_primary_ID_genes	5
B4GAT1	ENSG00000174684	11	DisGenNet;HPO;IPA;Radboudumc_:_Exome_panels;SysID_candidate_ID_genes	5
B9D1	ENSG00000108641	17	DisGenNet;HPO;IPA;Opentarget_genetic_association;Phenolyser;Radboudumc_:_Exome_panels;SysID_primary_ID_genes	7
BAZ1B	ENSG00000009954	7	DisGenNet;HPO;Opentarget_textMining;Phenolyser;SysID_candidate_ID_genes	5
BBIP1	ENSG00000214413	10	DisGenNet;Fulgent_:_gene_panel;HPO;Opentarget_textMining;Phenolyser;SysID_candidate_ID_genes	6
BBS1	ENSG00000174483	11	DDG2P;DisGenNet;Fulgent_:_gene_panel;HPO;Ilyas_M_(2020)_F1000Res;Vissers_LE_(2016)_Nat_Rev_Genet;Opentarget_textMining;Phenolyser;Radboudumc_:_Exome_panels;SysID_primary_ID_genes	10
BBS10	ENSG00000179941	12	DDG2P;DisGenNet;Fulgent_:_gene_panel;HPO;Ilyas_M_(2020)_F1000Res;Vissers_LE_(2016)_Nat_Rev_Genet;Opentarget_genetic_association;Opentarget_textMining;Phenolyser;Radboudumc_:_Exome_panels;SysID_primary_ID_genes	11
BBS12	ENSG00000181004	4	DDG2P;DisGenNet;Fulgent_:_gene_panel;HPO;Ilyas_M_(2020)_F1000Res;Vissers_LE_(2016)_Nat_Rev_Genet;Phenolyser;Radboudumc_:_Exome_panels;SysID_primary_ID_genes	9
BBS2	ENSG00000125124	16	DDG2P;DisGenNet;Fulgent_:_gene_panel;HPO;Ilyas_M_(2020)_F1000Res;Vissers_LE_(2016)_Nat_Rev_Genet;Phenolyser;Radboudumc_:_Exome_panels;SysID_primary_ID_genes	9
BBS4	ENSG00000140463	15	DDG2P;DisGenNet;Fulgent_:_gene_panel;HPO;IPA;Ilyas_M_(2020)_F1000Res;Vissers_LE_(2016)_Nat_Rev_Genet;Opentarget_genetic_association;Phenolyser;Radboudumc_:_Exome_panels;SysID_primary_ID_genes	11
BBS5	ENSG00000163093	2	DDG2P;DisGenNet;HPO;Ilyas_M_(2020)_F1000Res;Vissers_LE_(2016)_Nat_Rev_Genet;Phenolyser;Radboudumc_:_Exome_panels;SysID_primary_ID_genes	8
BBS7	ENSG00000138686	4	DDG2P;DisGenNet;Fulgent_:_gene_panel;HPO;IPA;Ilyas_M_(2020)_F1000Res;Vissers_LE_(2016)_Nat_Rev_Genet;Phenolyser;Radboudumc_:_Exome_panels;SysID_primary_ID_genes	10
BBS9	ENSG00000122507	7	DDG2P;DisGenNet;Fulgent_:_gene_panel;HPO;IPA;Ilyas_M_(2020)_F1000Res;Vissers_LE_(2016)_Nat_Rev_Genet;Opentarget_genetic_association;Phenolyser;Radboudumc_:_Exome_panels;SysID_primary_ID_genes	11
BCAP31	ENSG00000185825	X	DDG2P;DisGenNet;HPO;IPA;Ilyas_M_(2020)_F1000Res;Opentarget_textMining;Phenolyser;Radboudumc_:_Exome_panels;SysID_primary_ID_genes	9
BCAS3	ENSG00000141376	17	HPO;IPA;Orphanet;Radboudumc_:_Exome_panels;SysID_primary_ID_genes	5
BCHE	ENSG00000114200	3	DisGenNet;Opentarget_textMining;SysID_candidate_ID_genes	3
BCKDHA	ENSG00000248098	19	DDG2P;DisGenNet;HPO;IPA;Ilyas_M_(2020)_F1000Res;Vissers_LE_(2016)_Nat_Rev_Genet;Opentarget_genetic_association;Phenolyser;Radboudumc_:_Exome_panels;SysID_primary_ID_genes	10
BCKDHB	ENSG00000083123	6	DDG2P;DisGenNet;HPO;Ilyas_M_(2020)_F1000Res;Vissers_LE_(2016)_Nat_Rev_Genet;Phenolyser;Radboudumc_:_Exome_panels;SysID_primary_ID_genes	8
BCKDK	ENSG00000103507	16	DisGenNet;HPO;IPA;Ilyas_M_(2020)_F1000Res;Opentarget_genetic_association;Opentarget_textMining;Phenolyser;Radboudumc_:_Exome_panels;SysID_primary_ID_genes	9
BCL11A	ENSG00000119866	2	DDG2P;DisGenNet;Fulgent_:_gene_panel;HPO;IPA;Coe_B.P_(2019)_Nat_Genet;Ilyas_M_(2020)_F1000Res;Vissers_LE_(2016)_Nat_Rev_Genet;Opentarget_genetic_association;Opentarget_textMining;Orphanet;Phenolyser;Radboudumc_:_Exome_panels;SysID_primary_ID_genes	14
BCL11B	ENSG00000127152	14	DisGenNet;HPO;IPA;OMIM-2022-12-09;Opentarget_genetic_association;Opentarget_textMining;Phenolyser;Radboudumc_:_Exome_panels;SysID_primary_ID_genes	9
BCOR	ENSG00000183337	X	DDG2P;DisGenNet;Fulgent_:_gene_panel;HPO;IPA;Ilyas_M_(2020)_F1000Res;Vissers_LE_(2016)_Nat_Rev_Genet;Opentarget_genetic_association;Phenolyser;Radboudumc_:_Exome_panels;SysID_primary_ID_genes	11
BCORL1	ENSG00000085185	X	DisGenNet;HPO;IPA;Opentarget_genetic_association;Orphanet;Radboudumc_:_Exome_panels;SysID_primary_ID_genes	7
BCR	ENSG00000186716	22	DisGenNet;HPO;Phenolyser	3
BCS1L	ENSG00000074582	2	DisGenNet;Fulgent_:_gene_panel;HPO;IPA;Ilyas_M_(2020)_F1000Res;Vissers_LE_(2016)_Nat_Rev_Genet;Opentarget_genetic_association;Phenolyser;Radboudumc_:_Exome_panels;SysID_primary_ID_genes	10
BDNF	ENSG00000176697	11	DisGenNet;Fulgent_:_gene_panel;HPO;Opentarget_textMining;Phenolyser;SysID_candidate_ID_genes	6
BEST1	ENSG00000167995	11	DisGenNet;HPO;Phenolyser	3
BICD2	ENSG00000185963	9	DisGenNet;HPO;Ilyas_M_(2020)_F1000Res;SysID_candidate_ID_genes	4
BICRA	ENSG00000063169	19	HPO;IPA;Opentarget_genetic_association;Radboudumc_:_Exome_panels;SysID_primary_ID_genes	5
BIN1	ENSG00000136717	2	DDG2P;DisGenNet;Fulgent_:_gene_panel;HPO;Phenolyser	5
BLM	ENSG00000197299	15	DDG2P;DisGenNet;HPO;Ilyas_M_(2020)_F1000Res;Vissers_LE_(2016)_Nat_Rev_Genet;Phenolyser;Radboudumc_:_Exome_panels;SysID_primary_ID_genes	8
BMP2	ENSG00000125845	20	DisGenNet;HPO;Phenolyser	3
BMP4	ENSG00000125378	14	DDG2P;DisGenNet;HPO;Opentarget_genetic_association;Opentarget_textMining;Phenolyser	6
BMPER	ENSG00000164619	7	DDG2P;DisGenNet;HPO;Phenolyser	4
BMPR1A	ENSG00000107779	10	DisGenNet;HPO;Opentarget_textMining	3
BOD1	ENSG00000145919	5	DisGenNet;IPA;Opentarget_genetic_association;Opentarget_textMining;SysID_primary_ID_genes	5
BOLA3	ENSG00000163170	2	DDG2P;DisGenNet;HPO;Phenolyser	4
BORCS5	ENSG00000165714	12	DisGenNet;Opentarget_genetic_association;Opentarget_textMining	3
BPTF	ENSG00000171634	17	DDG2P;DisGenNet;HPO;IPA;Ilyas_M_(2020)_F1000Res;Opentarget_genetic_association;Orphanet;Phenolyser;Radboudumc_:_Exome_panels;SysID_primary_ID_genes	10
BRAF	ENSG00000157764	7	DDG2P;DisGenNet;Fulgent_:_gene_panel;HPO;Coe_B.P_(2019)_Nat_Genet;Ilyas_M_(2020)_F1000Res;Vissers_LE_(2016)_Nat_Rev_Genet;Opentarget_genetic_association;Opentarget_textMining;Phenolyser;Radboudumc_:_Exome_panels;SysID_primary_ID_genes	12
BRAT1	ENSG00000106009	7	DisGenNet;HPO;IPA;Ilyas_M_(2020)_F1000Res;Opentarget_genetic_association;Opentarget_textMining;Phenolyser;Radboudumc_:_Exome_panels;SysID_primary_ID_genes	9
BRCA1	ENSG00000012048	17	DisGenNet;HPO;Opentarget_genetic_association;Opentarget_textMining;Phenolyser;SysID_primary_ID_genes	6
BRCA2	ENSG00000139618	13	DisGenNet;HPO;IPA;Opentarget_genetic_association;Phenolyser	5
BRD4	ENSG00000141867	19	DDG2P;DisGenNet;HPO;Opentarget_genetic_association;SysID_primary_ID_genes	5
BRF1	ENSG00000185024	14	DisGenNet;HPO;IPA;Ilyas_M_(2020)_F1000Res;Opentarget_genetic_association;Phenolyser;Radboudumc_:_Exome_panels;SysID_primary_ID_genes	8
BRIP1	ENSG00000136492	17	DDG2P;DisGenNet;HPO;Phenolyser	4
BRPF1	ENSG00000156983	3	DDG2P;DisGenNet;HPO;IPA;Coe_B.P_(2019)_Nat_Genet;Ilyas_M_(2020)_F1000Res;OMIM-2022-12-09;Opentarget_genetic_association;Opentarget_textMining;Phenolyser;Radboudumc_:_Exome_panels;SysID_primary_ID_genes	12
BRSK2	ENSG00000174672	11	DisGenNet;Fulgent_:_gene_panel;HPO;IPA;Opentarget_genetic_association;Orphanet;Radboudumc_:_Exome_panels;SysID_primary_ID_genes	8
BRWD3	ENSG00000165288	X	DDG2P;DisGenNet;Fulgent_:_gene_panel;HPO;IPA;Ilyas_M_(2020)_F1000Res;Vissers_LE_(2016)_Nat_Rev_Genet;OMIM-2022-12-09;Opentarget_genetic_association;Opentarget_textMining;Phenolyser;Radboudumc_:_Exome_panels;SysID_primary_ID_genes	13
BSCL2	ENSG00000168000	11	DisGenNet;HPO;Ilyas_M_(2020)_F1000Res;Vissers_LE_(2016)_Nat_Rev_Genet;Opentarget_textMining;Phenolyser;Radboudumc_:_Exome_panels;SysID_primary_ID_genes	8
BSND	ENSG00000162399	1	DDG2P;DisGenNet;HPO;Ilyas_M_(2020)_F1000Res;Phenolyser	5
BTD	ENSG00000169814	3	HPO;IPA;Ilyas_M_(2020)_F1000Res;Vissers_LE_(2016)_Nat_Rev_Genet;Opentarget_genetic_association;Radboudumc_:_Exome_panels;SysID_candidate_ID_genes	7
BUB1	ENSG00000169679	2	DisGenNet;HPO;Opentarget_textMining;Phenolyser	4
BUB1B	ENSG00000156970	15	DDG2P;DisGenNet;Fulgent_:_gene_panel;HPO;Ilyas_M_(2020)_F1000Res;Vissers_LE_(2016)_Nat_Rev_Genet;Opentarget_textMining;Phenolyser;Radboudumc_:_Exome_panels;SysID_primary_ID_genes	10
BUB3	ENSG00000154473	10	DisGenNet;HPO;Opentarget_textMining;Phenolyser	4
C12ORF4	ENSG00000047621	12	0	0
C12orf4	ENSG00000047621	12	DisGenNet;IPA;Ilyas_M_(2020)_F1000Res;OMIM-2022-12-09;Opentarget_genetic_association;Opentarget_textMining;Radboudumc_:_Exome_panels;SysID_primary_ID_genes	8
C12orf57	ENSG00000111678	12	DDG2P;DisGenNet;IPA;Ilyas_M_(2020)_F1000Res;Vissers_LE_(2016)_Nat_Rev_Genet;Opentarget_genetic_association;Opentarget_textMining;Radboudumc_:_Exome_panels;SysID_primary_ID_genes	9
C12orf65	ENSG00000130921	12	0	0
C22orf31	ENSG00000100249	22	IPA;Opentarget_genetic_association;SysID_candidate_ID_genes	3
C2CD3	ENSG00000168014	11	DisGenNet;HPO;Ilyas_M_(2020)_F1000Res;Phenolyser;Radboudumc_:_Exome_panels;SysID_candidate_ID_genes	6
CA2	ENSG00000104267	8	DDG2P;DisGenNet;Fulgent_:_gene_panel;HPO;Ilyas_M_(2020)_F1000Res;Vissers_LE_(2016)_Nat_Rev_Genet;Opentarget_genetic_association;Phenolyser;Radboudumc_:_Exome_panels;SysID_primary_ID_genes	10
CA4	ENSG00000167434	17	DisGenNet;HPO;Phenolyser	3
CA8	ENSG00000178538	8	DDG2P;DisGenNet;HPO;IPA;Ilyas_M_(2020)_F1000Res;Vissers_LE_(2016)_Nat_Rev_Genet;OMIM-2022-12-09;Opentarget_textMining;Phenolyser;Radboudumc_:_Exome_panels;SysID_primary_ID_genes	11
CACNA1A	ENSG00000141837	19	DDG2P;DisGenNet;Fulgent_:_gene_panel;HPO;IPA;Ilyas_M_(2020)_F1000Res;Opentarget_genetic_association;Opentarget_textMining;Phenolyser;Radboudumc_:_Exome_panels;SysID_primary_ID_genes	11
CACNA1B	ENSG00000148408	9	DisGenNet;HPO;Opentarget_genetic_association;Opentarget_textMining;Radboudumc_:_Exome_panels;SysID_primary_ID_genes	6
CACNA1C	ENSG00000151067	12	Fulgent_:_gene_panel;HPO;IPA;Ilyas_M_(2020)_F1000Res;Opentarget_genetic_association;Opentarget_textMining;Phenolyser;Radboudumc_:_Exome_panels;SysID_primary_ID_genes	9
CACNA1D	ENSG00000157388	3	DisGenNet;HPO;IPA;Ilyas_M_(2020)_F1000Res;Opentarget_genetic_association;Opentarget_textMining;Phenolyser;Radboudumc_:_Exome_panels;SysID_primary_ID_genes	9
CACNA1E	ENSG00000198216	1	DDG2P;DisGenNet;Coe_B.P_(2019)_Nat_Genet;Opentarget_genetic_association;Radboudumc_:_Exome_panels;SysID_primary_ID_genes	6
CACNA1G	ENSG00000006283	17	DisGenNet;HPO;IPA;Ilyas_M_(2020)_F1000Res;Opentarget_genetic_association;Opentarget_textMining;Phenolyser;Radboudumc_:_Exome_panels;SysID_primary_ID_genes	9
CACNA1H	ENSG00000196557	16	DisGenNet;HPO;IPA;Opentarget_textMining;SysID_candidate_ID_genes	5
CACNA1I	ENSG00000100346	22	HPO;Orphanet;Radboudumc_:_Exome_panels;SysID_primary_ID_genes	4
CACNA2D1	ENSG00000153956	7	DisGenNet;Opentarget_genetic_association;Opentarget_textMining;SysID_candidate_ID_genes	4
CACNA2D2	ENSG00000007402	3	Ilyas_M_(2020)_F1000Res;Phenolyser;Radboudumc_:_Exome_panels;SysID_primary_ID_genes	4
CACNB4	ENSG00000182389	2	DisGenNet;Opentarget_genetic_association;Opentarget_textMining;Phenolyser;SysID_candidate_ID_genes	5
CACNG2	ENSG00000166862	22	DisGenNet;Fulgent_:_gene_panel;HPO;IPA;Vissers_LE_(2016)_Nat_Rev_Genet;OMIM-2022-12-09;Orphanet;Phenolyser;SysID_candidate_ID_genes	9
CACNG7	ENSG00000105605	19	IPA;Opentarget_genetic_association;SysID_candidate_ID_genes	3
CAD	ENSG00000084774	2	DDG2P;DisGenNet;HPO;Phenolyser	4
CADPS2	ENSG00000081803	7	DisGenNet;IPA;Opentarget_textMining;SysID_candidate_ID_genes	4
CALY	ENSG00000130643	10	DisGenNet;IPA;Opentarget_textMining	3
CAMK2A	ENSG00000070808	5	DDG2P;DisGenNet;HPO;IPA;Ilyas_M_(2020)_F1000Res;Mireia_Coll-TanÃ©_(2019)_Dis_Model_Mech;OMIM-2022-12-09;Opentarget_genetic_association;Opentarget_textMining;Orphanet;Phenolyser;Radboudumc_:_Exome_panels;SysID_primary_ID_genes	13
CAMK2B	ENSG00000058404	7	AutDB;DDG2P;DisGenNet;HPO;IPA;Ilyas_M_(2020)_F1000Res;OMIM-2022-12-09;Opentarget_genetic_association;Opentarget_textMining;Orphanet;Phenolyser;Radboudumc_:_Exome_panels;SysID_primary_ID_genes	13
CAMK2G	ENSG00000148660	10	DisGenNet;IPA;OMIM-2022-12-09;Opentarget_genetic_association;Opentarget_textMining;Radboudumc_:_Exome_panels;SysID_candidate_ID_genes	7
CAMK4	ENSG00000152495	5	Opentarget_genetic_association;Opentarget_textMining;Radboudumc_:_Exome_panels;SysID_primary_ID_genes	4
CAMKMT	ENSG00000143919	2	DisGenNet;HPO;Opentarget_textMining;Phenolyser	4
CAMTA1	ENSG00000171735	1	DDG2P;DisGenNet;Fulgent_:_gene_panel;HPO;IPA;Ilyas_M_(2020)_F1000Res;Vissers_LE_(2016)_Nat_Rev_Genet;Opentarget_genetic_association;Opentarget_textMining;Orphanet;Phenolyser;Radboudumc_:_Exome_panels;SysID_primary_ID_genes	13
CANT1	ENSG00000171302	17	DisGenNet;Fulgent_:_gene_panel;HPO;Phenolyser;Radboudumc_:_Exome_panels	5
CAPN10	ENSG00000142330	2	DisGenNet;IPA;Ilyas_M_(2020)_F1000Res;Opentarget_textMining;SysID_primary_ID_genes	5
CAPN15	ENSG00000103326	16	Coe_B.P_(2019)_Nat_Genet;Radboudumc_:_Exome_panels;SysID_primary_ID_genes	3
CAPN3	ENSG00000092529	15	DisGenNet;Opentarget_textMining;SysID_candidate_ID_genes	3
CAPZA2	ENSG00000198898	7	IPA;Opentarget_genetic_association;SysID_candidate_ID_genes	3
CARNMT1	ENSG00000156017	9	IPA;Opentarget_genetic_association;SysID_candidate_ID_genes	3
CARS1	ENSG00000110619	11	HPO;Radboudumc_:_Exome_panels;SysID_primary_ID_genes	3
CARS2	ENSG00000134905	13	DisGenNet;HPO;Ilyas_M_(2020)_F1000Res;Radboudumc_:_Exome_panels;SysID_primary_ID_genes	5
CASK	ENSG00000147044	X	AutDB;DDG2P;DisGenNet;Fulgent_:_gene_panel;HPO;IPA;Coe_B.P_(2019)_Nat_Genet;Ilyas_M_(2020)_F1000Res;Vissers_LE_(2016)_Nat_Rev_Genet;OMIM-2022-12-09;Opentarget_genetic_association;Opentarget_textMining;Orphanet;Phenolyser;Radboudumc_:_Exome_panels;SysID_primary_ID_genes	16
CASP2	ENSG00000106144	7	DisGenNet;IPA;Ilyas_M_(2020)_F1000Res;Opentarget_textMining;SysID_candidate_ID_genes	5
CASR	ENSG00000036828	3	DisGenNet;Ilyas_M_(2020)_F1000Res;Opentarget_textMining;Phenolyser	4
CAV1	ENSG00000105974	7	DisGenNet;HPO;Phenolyser	3
CBL	ENSG00000110395	11	DisGenNet;Ilyas_M_(2020)_F1000Res;Vissers_LE_(2016)_Nat_Rev_Genet;Opentarget_textMining;Radboudumc_:_Exome_panels;SysID_primary_ID_genes	6
CBS	ENSG00000160200	21	DDG2P;DisGenNet;Fulgent_:_gene_panel;HPO;Ilyas_M_(2020)_F1000Res;Vissers_LE_(2016)_Nat_Rev_Genet;Opentarget_genetic_association;Phenolyser;Radboudumc_:_Exome_panels;SysID_primary_ID_genes	10
CC2D1A	ENSG00000132024	19	DDG2P;DisGenNet;Fulgent_:_gene_panel;HPO;IPA;Ilyas_M_(2020)_F1000Res;Vissers_LE_(2016)_Nat_Rev_Genet;OMIM-2022-12-09;Opentarget_genetic_association;Opentarget_textMining;Orphanet;Phenolyser;Radboudumc_:_Exome_panels;SysID_primary_ID_genes	14
CC2D2A	ENSG00000048342	4	DDG2P;DisGenNet;Fulgent_:_gene_panel;HPO;IPA;Ilyas_M_(2020)_F1000Res;Vissers_LE_(2016)_Nat_Rev_Genet;Opentarget_genetic_association;Opentarget_textMining;Phenolyser;Radboudumc_:_Exome_panels;SysID_primary_ID_genes	12
CCBE1	ENSG00000183287	18	DDG2P;DisGenNet;HPO;Ilyas_M_(2020)_F1000Res;Vissers_LE_(2016)_Nat_Rev_Genet;Opentarget_textMining;Phenolyser;Radboudumc_:_Exome_panels;SysID_primary_ID_genes	9
CCDC115	ENSG00000136710	2	DisGenNet;HPO;Phenolyser	3
CCDC174	ENSG00000154781	3	DisGenNet;HPO;Opentarget_textMining;Phenolyser	4
CCDC22	ENSG00000101997	X	DDG2P;DisGenNet;Fulgent_:_gene_panel;HPO;IPA;Ilyas_M_(2020)_F1000Res;Opentarget_genetic_association;Opentarget_textMining;Phenolyser;Radboudumc_:_Exome_panels;SysID_primary_ID_genes	11
CCDC32	ENSG00000128891	15	HPO;Orphanet;Radboudumc_:_Exome_panels;SysID_primary_ID_genes	4
CCDC47	ENSG00000108588	17	DDG2P;DisGenNet;HPO;Opentarget_genetic_association;Opentarget_textMining	5
CCDC88A	ENSG00000115355	2	DisGenNet;HPO;Phenolyser;Radboudumc_:_Exome_panels;SysID_primary_ID_genes	5
CCDC88C	ENSG00000015133	14	DisGenNet;Fulgent_:_gene_panel;HPO;Ilyas_M_(2020)_F1000Res;Phenolyser;Radboudumc_:_Exome_panels;SysID_primary_ID_genes	7
CCNA2	ENSG00000145386	4	DisGenNet;IPA;Ilyas_M_(2020)_F1000Res;SysID_candidate_ID_genes	4
CCND2	ENSG00000118971	12	DDG2P;Ilyas_M_(2020)_F1000Res;Radboudumc_:_Exome_panels;SysID_primary_ID_genes	4
CCNK	ENSG00000090061	14	IPA;OMIM-2022-12-09;Orphanet;Radboudumc_:_Exome_panels;SysID_candidate_ID_genes	5
CD96	ENSG00000153283	3	DisGenNet;HPO;IPA;Ilyas_M_(2020)_F1000Res;Phenolyser;SysID_candidate_ID_genes	6
CDC42	ENSG00000070831	1	DisGenNet;Fulgent_:_gene_panel;HPO;IPA;Ilyas_M_(2020)_F1000Res;Opentarget_genetic_association;Opentarget_textMining;Phenolyser;Radboudumc_:_Exome_panels;SysID_primary_ID_genes	10
CDC42BPB	ENSG00000198752	14	HPO;Opentarget_genetic_association;Opentarget_textMining;Radboudumc_:_Exome_panels;SysID_primary_ID_genes	5
CDC45	ENSG00000093009	22	DisGenNet;HPO;IPA;Phenolyser;SysID_candidate_ID_genes	5
CDC6	ENSG00000094804	17	DisGenNet;HPO;Ilyas_M_(2020)_F1000Res;Phenolyser;Radboudumc_:_Exome_panels;SysID_candidate_ID_genes	6
CDCA7	ENSG00000144354	2	DisGenNet;HPO;Phenolyser	3
CDH11	ENSG00000140937	16	DisGenNet;HPO;IPA;Ilyas_M_(2020)_F1000Res;Phenolyser;Radboudumc_:_Exome_panels;SysID_primary_ID_genes	7
CDH15	ENSG00000129910	16	DDG2P;DisGenNet;Fulgent_:_gene_panel;HPO;IPA;Ilyas_M_(2020)_F1000Res;Vissers_LE_(2016)_Nat_Rev_Genet;OMIM-2022-12-09;Opentarget_genetic_association;Opentarget_textMining;Orphanet;Phenolyser;Radboudumc_:_Exome_panels;SysID_candidate_ID_genes	14
CDH2	ENSG00000170558	18	DisGenNet;HPO;Opentarget_textMining;Phenolyser;Radboudumc_:_Exome_panels;SysID_primary_ID_genes	6
CDH23	ENSG00000107736	10	DisGenNet;HPO;Ilyas_M_(2020)_F1000Res;Phenolyser	4
CDHR1	ENSG00000148600	10	DisGenNet;HPO;Phenolyser	3
CDK10	ENSG00000185324	16	DDG2P;DisGenNet;HPO;IPA;Opentarget_genetic_association;Phenolyser;Radboudumc_:_Exome_panels;SysID_primary_ID_genes	8
CDK13	ENSG00000065883	7	DDG2P;DisGenNet;Fulgent_:_gene_panel;HPO;IPA;Coe_B.P_(2019)_Nat_Genet;Ilyas_M_(2020)_F1000Res;OMIM-2022-12-09;Opentarget_genetic_association;Opentarget_textMining;Phenolyser;Radboudumc_:_Exome_panels;SysID_primary_ID_genes	13
CDK16	ENSG00000102225	X	DDG2P;DisGenNet;Fulgent_:_gene_panel;IPA;Ilyas_M_(2020)_F1000Res;Opentarget_genetic_association;Opentarget_textMining;SysID_candidate_ID_genes	8
CDK19	ENSG00000155111	6	DDG2P;DisGenNet;HPO;Opentarget_textMining;Radboudumc_:_Exome_panels;SysID_primary_ID_genes	6
CDK5	ENSG00000164885	7	DisGenNet;Opentarget_textMining;SysID_candidate_ID_genes	3
CDK5R1	ENSG00000176749	17	DisGenNet;Opentarget_textMining;SysID_candidate_ID_genes	3
CDK5RAP2	ENSG00000136861	9	DisGenNet;HPO;Ilyas_M_(2020)_F1000Res;Vissers_LE_(2016)_Nat_Rev_Genet;Opentarget_genetic_association;Opentarget_textMining;Phenolyser;Radboudumc_:_Exome_panels;SysID_primary_ID_genes	9
CDK6	ENSG00000105810	7	DisGenNet;HPO;Ilyas_M_(2020)_F1000Res;Phenolyser;SysID_primary_ID_genes	5
CDK8	ENSG00000132964	13	DDG2P;DisGenNet;HPO;IPA;OMIM-2022-12-09;Opentarget_textMining;Radboudumc_:_Exome_panels;SysID_primary_ID_genes	8
CDKL5	ENSG00000008086	X	DDG2P;DisGenNet;Fulgent_:_gene_panel;HPO;IPA;Coe_B.P_(2019)_Nat_Genet;Ilyas_M_(2020)_F1000Res;Vissers_LE_(2016)_Nat_Rev_Genet;Opentarget_genetic_association;Opentarget_textMining;Phenolyser;Radboudumc_:_Exome_panels;SysID_primary_ID_genes	13
CDKN1C	ENSG00000129757	11	DisGenNet;Fulgent_:_gene_panel;Ilyas_M_(2020)_F1000Res;Radboudumc_:_Exome_panels	4
CDON	ENSG00000064309	11	DisGenNet;HPO;Ilyas_M_(2020)_F1000Res;Vissers_LE_(2016)_Nat_Rev_Genet;Phenolyser;Radboudumc_:_Exome_panels;SysID_primary_ID_genes	7
CDT1	ENSG00000167513	16	DisGenNet;HPO;Phenolyser	3
CELF2	ENSG00000048740	10	HPO;Radboudumc_:_Exome_panels;SysID_primary_ID_genes	3
CENPE	ENSG00000138778	4	DisGenNet;HPO;IPA;Opentarget_textMining;Phenolyser;SysID_primary_ID_genes	6
CENPF	ENSG00000117724	1	DisGenNet;Ilyas_M_(2020)_F1000Res;Radboudumc_:_Exome_panels;SysID_primary_ID_genes	4
CENPJ	ENSG00000151849	13	DDG2P;DisGenNet;HPO;Ilyas_M_(2020)_F1000Res;Vissers_LE_(2016)_Nat_Rev_Genet;Opentarget_genetic_association;Opentarget_textMining;Phenolyser;Radboudumc_:_Exome_panels;SysID_primary_ID_genes	10
CEP104	ENSG00000116198	1	DisGenNet;HPO;Ilyas_M_(2020)_F1000Res;OMIM-2022-12-09;Phenolyser;Radboudumc_:_Exome_panels;SysID_primary_ID_genes	7
CEP120	ENSG00000168944	5	DisGenNet;HPO;Phenolyser;Radboudumc_:_Exome_panels;SysID_primary_ID_genes	5
CEP135	ENSG00000174799	4	DDG2P;DisGenNet;HPO;Ilyas_M_(2020)_F1000Res;Vissers_LE_(2016)_Nat_Rev_Genet;Phenolyser;Radboudumc_:_Exome_panels;SysID_primary_ID_genes	8
CEP152	ENSG00000103995	15	DisGenNet;HPO;Ilyas_M_(2020)_F1000Res;Vissers_LE_(2016)_Nat_Rev_Genet;Opentarget_textMining;Phenolyser;Radboudumc_:_Exome_panels;SysID_primary_ID_genes	8
CEP164	ENSG00000110274	11	DisGenNet;HPO;Opentarget_textMining;Phenolyser	4
CEP19	ENSG00000174007	3	HPO;Phenolyser;SysID_primary_ID_genes	3
CEP290	ENSG00000198707	12	DDG2P;DisGenNet;Fulgent_:_gene_panel;HPO;IPA;Ilyas_M_(2020)_F1000Res;Vissers_LE_(2016)_Nat_Rev_Genet;Opentarget_genetic_association;Opentarget_textMining;Phenolyser;Radboudumc_:_Exome_panels;SysID_primary_ID_genes	12
CEP41	ENSG00000106477	7	DDG2P;DisGenNet;Fulgent_:_gene_panel;HPO;IPA;Ilyas_M_(2020)_F1000Res;Vissers_LE_(2016)_Nat_Rev_Genet;Phenolyser;Radboudumc_:_Exome_panels;SysID_primary_ID_genes	10
CEP57	ENSG00000166037	11	DDG2P;DisGenNet;Fulgent_:_gene_panel;HPO;Ilyas_M_(2020)_F1000Res;Phenolyser;Radboudumc_:_Exome_panels;SysID_primary_ID_genes	8
CEP63	ENSG00000182923	3	DisGenNet;HPO;Ilyas_M_(2020)_F1000Res;Phenolyser;Radboudumc_:_Exome_panels;SysID_primary_ID_genes	6
CEP83	ENSG00000173588	12	DDG2P;DisGenNet;HPO;Ilyas_M_(2020)_F1000Res;Opentarget_textMining;Phenolyser;Radboudumc_:_Exome_panels;SysID_primary_ID_genes	8
CEP85L	ENSG00000111860	6	HPO;Radboudumc_:_Exome_panels;SysID_primary_ID_genes	3
CEP89	ENSG00000121289	19	Opentarget_textMining;Radboudumc_:_Exome_panels;SysID_candidate_ID_genes	3
CERKL	ENSG00000188452	2	DisGenNet;HPO;Phenolyser	3
CERS1	ENSG00000223802	19	DisGenNet;HPO;Phenolyser;SysID_candidate_ID_genes	4
CERT1	ENSG00000113163	5	DDG2P;DisGenNet;HPO;IPA;Opentarget_genetic_association;Opentarget_textMining;Radboudumc_:_Exome_panels;SysID_primary_ID_genes	8
CFAP418	ENSG00000156172	8	DDG2P;HPO;SysID_candidate_ID_genes	3
CHAF1B	ENSG00000159259	21	Opentarget_genetic_association;Opentarget_textMining;SysID_candidate_ID_genes	3
CHAMP1	ENSG00000198824	13	AutDB;DisGenNet;Fulgent_:_gene_panel;HPO;IPA;Coe_B.P_(2019)_Nat_Genet;Ilyas_M_(2020)_F1000Res;Vissers_LE_(2016)_Nat_Rev_Genet;Opentarget_genetic_association;Opentarget_textMining;Orphanet;Phenolyser;Radboudumc_:_Exome_panels;SysID_primary_ID_genes	14
CHAT	ENSG00000070748	10	DisGenNet;HPO;Phenolyser	3
CHD1	ENSG00000153922	5	DDG2P;DisGenNet;HPO;IPA;Opentarget_genetic_association;Opentarget_textMining;Orphanet;Phenolyser;Radboudumc_:_Exome_panels;SysID_primary_ID_genes	10
CHD2	ENSG00000173575	15	DisGenNet;Fulgent_:_gene_panel;HPO;IPA;Coe_B.P_(2019)_Nat_Genet;Ilyas_M_(2020)_F1000Res;Vissers_LE_(2016)_Nat_Rev_Genet;Opentarget_genetic_association;Opentarget_textMining;Phenolyser;Radboudumc_:_Exome_panels;SysID_primary_ID_genes	12
CHD3	ENSG00000170004	17	DDG2P;DisGenNet;IPA;Coe_B.P_(2019)_Nat_Genet;Opentarget_genetic_association;Opentarget_textMining;Orphanet;Radboudumc_:_Exome_panels;SysID_primary_ID_genes	9
CHD4	ENSG00000111642	12	DDG2P;DisGenNet;HPO;IPA;Coe_B.P_(2019)_Nat_Genet;Ilyas_M_(2020)_F1000Res;Opentarget_genetic_association;Opentarget_textMining;Phenolyser;Radboudumc_:_Exome_panels;SysID_primary_ID_genes	11
CHD5	ENSG00000116254	1	DDG2P;DisGenNet;HPO;Opentarget_genetic_association;Orphanet;Radboudumc_:_Exome_panels;SysID_primary_ID_genes	7
CHD7	ENSG00000171316	8	DDG2P;DisGenNet;Fulgent_:_gene_panel;HPO;Coe_B.P_(2019)_Nat_Genet;Ilyas_M_(2020)_F1000Res;Vissers_LE_(2016)_Nat_Rev_Genet;Opentarget_genetic_association;Opentarget_textMining;Phenolyser;Radboudumc_:_Exome_panels;SysID_primary_ID_genes	12
CHD8	ENSG00000100888	14	DDG2P;DisGenNet;Fulgent_:_gene_panel;HPO;IPA;Coe_B.P_(2019)_Nat_Genet;Ilyas_M_(2020)_F1000Res;Vissers_LE_(2016)_Nat_Rev_Genet;OMIM-2022-12-09;Opentarget_genetic_association;Opentarget_textMining;Phenolyser;Radboudumc_:_Exome_panels;SysID_primary_ID_genes	14
CHKB	ENSG00000100288	22	DisGenNet;HPO;IPA;Ilyas_M_(2020)_F1000Res;Vissers_LE_(2016)_Nat_Rev_Genet;Opentarget_textMining;Phenolyser;Radboudumc_:_Exome_panels;SysID_primary_ID_genes	9
CHL1	ENSG00000134121	3	DisGenNet;Ilyas_M_(2020)_F1000Res;Opentarget_textMining;Phenolyser;SysID_candidate_ID_genes	5
CHM	ENSG00000188419	X	DisGenNet;Ilyas_M_(2020)_F1000Res;Opentarget_textMining	3
CHMP1A	ENSG00000131165	16	DDG2P;DisGenNet;HPO;IPA;Ilyas_M_(2020)_F1000Res;Opentarget_genetic_association;Phenolyser;Radboudumc_:_Exome_panels;SysID_primary_ID_genes	9
CHN1	ENSG00000128656	2	DisGenNet;HPO;Opentarget_genetic_association;Phenolyser	4
CHRM1	ENSG00000168539	11	DDG2P;IPA;Opentarget_genetic_association;Radboudumc_:_Exome_panels;SysID_candidate_ID_genes	5
CHRM3	ENSG00000133019	1	DisGenNet;IPA;Opentarget_textMining;Phenolyser;SysID_candidate_ID_genes	5
CHRNA2	ENSG00000120903	8	HPO;IPA;Opentarget_genetic_association;Phenolyser	4
CHRNA4	ENSG00000101204	20	DDG2P;DisGenNet;Fulgent_:_gene_panel;HPO;Opentarget_genetic_association;Opentarget_textMining;Phenolyser;Radboudumc_:_Exome_panels;SysID_candidate_ID_genes	9
CHRNA7	ENSG00000175344	15	DisGenNet;HPO;Opentarget_textMining;Phenolyser;SysID_candidate_ID_genes	5
CHRNB2	ENSG00000160716	1	HPO;Opentarget_genetic_association;Phenolyser;SysID_candidate_ID_genes	4
CHST14	ENSG00000169105	15	DDG2P;HPO;Ilyas_M_(2020)_F1000Res;Phenolyser	4
CHSY1	ENSG00000131873	15	DisGenNet;HPO;IPA;Ilyas_M_(2020)_F1000Res;Opentarget_textMining;Phenolyser;SysID_candidate_ID_genes	7
CIB2	ENSG00000136425	15	DisGenNet;HPO;Ilyas_M_(2020)_F1000Res;Phenolyser	4
CIC	ENSG00000079432	19	DDG2P;DisGenNet;Fulgent_:_gene_panel;HPO;IPA;Ilyas_M_(2020)_F1000Res;OMIM-2022-12-09;Opentarget_genetic_association;Orphanet;Phenolyser;Radboudumc_:_Exome_panels;SysID_primary_ID_genes	12
CIP2A	ENSG00000163507	3	DisGenNet;Opentarget_textMining;SysID_candidate_ID_genes	3
CISD2	ENSG00000145354	4	DisGenNet;HPO;Opentarget_textMining;Phenolyser	4
CIT	ENSG00000122966	12	DDG2P;DisGenNet;HPO;IPA;Ilyas_M_(2020)_F1000Res;Opentarget_genetic_association;Opentarget_textMining;Phenolyser;Radboudumc_:_Exome_panels;SysID_primary_ID_genes	10
CKAP2L	ENSG00000169607	2	DDG2P;DisGenNet;HPO;IPA;Ilyas_M_(2020)_F1000Res;Opentarget_genetic_association;Phenolyser;Radboudumc_:_Exome_panels;SysID_primary_ID_genes	9
CLCN2	ENSG00000114859	3	IPA;Ilyas_M_(2020)_F1000Res;Opentarget_genetic_association;Opentarget_textMining;SysID_primary_ID_genes	5
CLCN3	ENSG00000109572	4	HPO;Orphanet;Radboudumc_:_Exome_panels;SysID_primary_ID_genes	4
CLCN4	ENSG00000073464	X	DDG2P;DisGenNet;Fulgent_:_gene_panel;HPO;IPA;Ilyas_M_(2020)_F1000Res;Opentarget_genetic_association;Opentarget_textMining;Orphanet;Phenolyser;Radboudumc_:_Exome_panels;SysID_primary_ID_genes	12
CLCN6	ENSG00000011021	1	HPO;Opentarget_genetic_association;Opentarget_textMining	3
CLCNKA	ENSG00000186510	1	DDG2P;DisGenNet;HPO;Phenolyser	4
CLCNKB	ENSG00000184908	1	DDG2P;DisGenNet;HPO;Vissers_LE_(2016)_Nat_Rev_Genet;Phenolyser	5
CLDN11	ENSG00000013297	3	HPO;IPA;Radboudumc_:_Exome_panels;SysID_primary_ID_genes	4
CLIC2	ENSG00000155962	X	DisGenNet;Fulgent_:_gene_panel;HPO;IPA;Vissers_LE_(2016)_Nat_Rev_Genet;OMIM-2022-12-09;Opentarget_textMining;Orphanet;Phenolyser;Radboudumc_:_Exome_panels;SysID_candidate_ID_genes	11
CLIP1	ENSG00000130779	12	DisGenNet;HPO;Opentarget_textMining;Orphanet;Radboudumc_:_Exome_panels;SysID_candidate_ID_genes	6
CLIP2	ENSG00000106665	7	DisGenNet;HPO;Phenolyser	3
CLN3	ENSG00000188603	16	DDG2P;DisGenNet;Fulgent_:_gene_panel;HPO;Ilyas_M_(2020)_F1000Res;Vissers_LE_(2016)_Nat_Rev_Genet;Opentarget_genetic_association;Opentarget_textMining;Phenolyser;Radboudumc_:_Exome_panels;SysID_candidate_ID_genes	11
CLN5	ENSG00000102805	13	DDG2P;DisGenNet;Fulgent_:_gene_panel;HPO;Ilyas_M_(2020)_F1000Res;Vissers_LE_(2016)_Nat_Rev_Genet;Opentarget_genetic_association;Phenolyser;Radboudumc_:_Exome_panels;SysID_candidate_ID_genes	10
CLN6	ENSG00000128973	15	Fulgent_:_gene_panel;Ilyas_M_(2020)_F1000Res;Vissers_LE_(2016)_Nat_Rev_Genet;Opentarget_textMining;Phenolyser;Radboudumc_:_Exome_panels;SysID_candidate_ID_genes	7
CLN8	ENSG00000182372	8	DDG2P;DisGenNet;Fulgent_:_gene_panel;HPO;IPA;Ilyas_M_(2020)_F1000Res;Vissers_LE_(2016)_Nat_Rev_Genet;Opentarget_genetic_association;Opentarget_textMining;Orphanet;Phenolyser;Radboudumc_:_Exome_panels;SysID_candidate_ID_genes	13
CLP1	ENSG00000172409	11	DisGenNet;HPO;Ilyas_M_(2020)_F1000Res;Phenolyser;Radboudumc_:_Exome_panels;SysID_primary_ID_genes	6
CLPB	ENSG00000162129	11	DDG2P;DisGenNet;HPO;Ilyas_M_(2020)_F1000Res;Opentarget_textMining;Phenolyser;Radboudumc_:_Exome_panels;SysID_primary_ID_genes	8
CLRN1	ENSG00000163646	3	DisGenNet;HPO;Phenolyser	3
CLTC	ENSG00000141367	17	DDG2P;DisGenNet;HPO;IPA;Coe_B.P_(2019)_Nat_Genet;Ilyas_M_(2020)_F1000Res;OMIM-2022-12-09;Opentarget_genetic_association;Opentarget_textMining;Orphanet;Phenolyser;Radboudumc_:_Exome_panels;SysID_primary_ID_genes	13
CLTCL1	ENSG00000070371	22	Opentarget_textMining;Orphanet;SysID_candidate_ID_genes	3
CNGA1	ENSG00000198515	4	DisGenNet;HPO;Phenolyser	3
CNGB1	ENSG00000070729	16	DisGenNet;HPO;Phenolyser	3
CNKSR1	ENSG00000142675	1	DisGenNet;IPA;Ilyas_M_(2020)_F1000Res;Opentarget_textMining;SysID_primary_ID_genes	5
CNKSR2	ENSG00000149970	X	AutDB;DDG2P;DisGenNet;Fulgent_:_gene_panel;HPO;IPA;Coe_B.P_(2019)_Nat_Genet;Ilyas_M_(2020)_F1000Res;OMIM-2022-12-09;Opentarget_genetic_association;Opentarget_textMining;Orphanet;Phenolyser;Radboudumc_:_Exome_panels;SysID_primary_ID_genes	15
CNNM2	ENSG00000148842	10	DDG2P;DisGenNet;HPO;IPA;Ilyas_M_(2020)_F1000Res;OMIM-2022-12-09;Opentarget_textMining;Orphanet;Phenolyser;Radboudumc_:_Exome_panels;SysID_primary_ID_genes	11
CNOT1	ENSG00000125107	16	HPO;IPA;Opentarget_genetic_association;Radboudumc_:_Exome_panels;SysID_primary_ID_genes	5
CNOT2	ENSG00000111596	12	IPA;OMIM-2022-12-09;Radboudumc_:_Exome_panels;SysID_candidate_ID_genes	4
CNOT3	ENSG00000088038	19	DisGenNet;HPO;IPA;Coe_B.P_(2019)_Nat_Genet;Ilyas_M_(2020)_F1000Res;OMIM-2022-12-09;Opentarget_genetic_association;Orphanet;Radboudumc_:_Exome_panels;SysID_primary_ID_genes	10
CNPY3	ENSG00000137161	6	DDG2P;HPO;Phenolyser;Radboudumc_:_Exome_panels;SysID_primary_ID_genes	5
CNTN2	ENSG00000184144	1	DisGenNet;HPO;Phenolyser	3
CNTN4	ENSG00000144619	3	DisGenNet;Opentarget_textMining;SysID_candidate_ID_genes	3
CNTN5	ENSG00000149972	11	DisGenNet;Opentarget_textMining;SysID_candidate_ID_genes	3
CNTNAP1	ENSG00000108797	17	IPA;Opentarget_textMining;Radboudumc_:_Exome_panels;SysID_primary_ID_genes	4
CNTNAP2	ENSG00000174469	7	DDG2P;DisGenNet;Fulgent_:_gene_panel;HPO;IPA;Ilyas_M_(2020)_F1000Res;Vissers_LE_(2016)_Nat_Rev_Genet;Opentarget_genetic_association;Opentarget_textMining;Phenolyser;Radboudumc_:_Exome_panels;SysID_primary_ID_genes	12
COA8	ENSG00000256053	14	DDG2P;DisGenNet;HPO;IPA;Radboudumc_:_Exome_panels;SysID_primary_ID_genes	6
COASY	ENSG00000068120	17	Ilyas_M_(2020)_F1000Res;Opentarget_textMining;Radboudumc_:_Exome_panels;SysID_primary_ID_genes	4
COG1	ENSG00000166685	17	DisGenNet;HPO;Ilyas_M_(2020)_F1000Res;Vissers_LE_(2016)_Nat_Rev_Genet;Phenolyser;Radboudumc_:_Exome_panels;SysID_primary_ID_genes	7
COG2	ENSG00000135775	1	DisGenNet;HPO;Phenolyser	3
COG4	ENSG00000103051	16	Ilyas_M_(2020)_F1000Res;Phenolyser;Radboudumc_:_Exome_panels;SysID_candidate_ID_genes	4
COG5	ENSG00000164597	7	DisGenNet;Fulgent_:_gene_panel;HPO;Ilyas_M_(2020)_F1000Res;Opentarget_textMining;Phenolyser;Radboudumc_:_Exome_panels;SysID_primary_ID_genes	8
COG6	ENSG00000133103	13	DisGenNet;HPO;IPA;Ilyas_M_(2020)_F1000Res;Vissers_LE_(2016)_Nat_Rev_Genet;Opentarget_genetic_association;Opentarget_textMining;Orphanet;Phenolyser;Radboudumc_:_Exome_panels;SysID_primary_ID_genes	11
COG7	ENSG00000168434	16	Fulgent_:_gene_panel;Ilyas_M_(2020)_F1000Res;Vissers_LE_(2016)_Nat_Rev_Genet;Opentarget_textMining;Phenolyser;Radboudumc_:_Exome_panels;SysID_primary_ID_genes	7
COG8	ENSG00000213380	16	DisGenNet;Fulgent_:_gene_panel;HPO;Ilyas_M_(2020)_F1000Res;Vissers_LE_(2016)_Nat_Rev_Genet;Phenolyser;Radboudumc_:_Exome_panels;SysID_primary_ID_genes	8
COL11A2	ENSG00000204248	6	IPA;Opentarget_genetic_association;Opentarget_textMining	3
COL13A1	ENSG00000197467	10	DisGenNet;HPO;Phenolyser	3
COL18A1	ENSG00000182871	21	DDG2P;DisGenNet;HPO;IPA;Ilyas_M_(2020)_F1000Res;SysID_primary_ID_genes	6
COL1A1	ENSG00000108821	17	DisGenNet;IPA;Ilyas_M_(2020)_F1000Res;Opentarget_textMining	4
COL1A2	ENSG00000164692	7	HPO;Opentarget_genetic_association;Phenolyser	3
COL2A1	ENSG00000139219	12	DisGenNet;HPO;Ilyas_M_(2020)_F1000Res;Opentarget_genetic_association;Phenolyser	5
COL3A1	ENSG00000168542	2	DisGenNet;HPO;Phenolyser;SysID_primary_ID_genes	4
COL4A1	ENSG00000187498	13	DDG2P;DisGenNet;HPO;Ilyas_M_(2020)_F1000Res;Vissers_LE_(2016)_Nat_Rev_Genet;Opentarget_textMining;Phenolyser;Radboudumc_:_Exome_panels;SysID_primary_ID_genes	9
COL4A2	ENSG00000134871	13	Ilyas_M_(2020)_F1000Res;Vissers_LE_(2016)_Nat_Rev_Genet;Opentarget_genetic_association;Opentarget_textMining;Radboudumc_:_Exome_panels;SysID_primary_ID_genes	6
COL4A3BP	ENSG00000113163	5	0	0
COL9A2	ENSG00000049089	1	IPA;Ilyas_M_(2020)_F1000Res;Opentarget_genetic_association	3
COL9A3	ENSG00000092758	20	DDG2P;HPO;Ilyas_M_(2020)_F1000Res	3
COLEC10	ENSG00000184374	8	DisGenNet;HPO;Phenolyser	3
COLEC11	ENSG00000118004	2	DDG2P;DisGenNet;HPO;Ilyas_M_(2020)_F1000Res;Vissers_LE_(2016)_Nat_Rev_Genet;Opentarget_textMining;Phenolyser;Radboudumc_:_Exome_panels;SysID_primary_ID_genes	9
COLQ	ENSG00000206561	3	DisGenNet;HPO;Opentarget_textMining;Phenolyser	4
COMT	ENSG00000093010	22	DisGenNet;HPO;IPA;Opentarget_textMining;Phenolyser	5
COPB1	ENSG00000129083	11	DDG2P;HPO;IPA;Opentarget_genetic_association;Orphanet;Radboudumc_:_Exome_panels;SysID_primary_ID_genes	7
COPB2	ENSG00000184432	3	DisGenNet;HPO;Phenolyser;Radboudumc_:_Exome_panels;SysID_primary_ID_genes	5
COQ2	ENSG00000173085	4	DisGenNet;HPO;Ilyas_M_(2020)_F1000Res;Vissers_LE_(2016)_Nat_Rev_Genet;Phenolyser;Radboudumc_:_Exome_panels;SysID_primary_ID_genes	7
COQ4	ENSG00000167113	9	DisGenNet;Ilyas_M_(2020)_F1000Res;Radboudumc_:_Exome_panels;SysID_primary_ID_genes	4
COQ5	ENSG00000110871	12	DisGenNet;IPA;Ilyas_M_(2020)_F1000Res;SysID_candidate_ID_genes	4
COQ7	ENSG00000167186	16	DisGenNet;HPO;Phenolyser	3
COQ8A	ENSG00000163050	1	DDG2P;DisGenNet;HPO;Ilyas_M_(2020)_F1000Res;Radboudumc_:_Exome_panels;SysID_primary_ID_genes	6
COQ9	ENSG00000088682	16	DDG2P;DisGenNet;HPO;Phenolyser	4
CORO1A	ENSG00000102879	16	DisGenNet;HPO;Opentarget_textMining;Phenolyser	4
COX10	ENSG00000006695	17	DDG2P;DisGenNet;Ilyas_M_(2020)_F1000Res;Vissers_LE_(2016)_Nat_Rev_Genet;Phenolyser;Radboudumc_:_Exome_panels;SysID_primary_ID_genes	7
COX14	ENSG00000178449	12	DDG2P;DisGenNet;Phenolyser;SysID_candidate_ID_genes	4
COX15	ENSG00000014919	10	DDG2P;DisGenNet;HPO;Ilyas_M_(2020)_F1000Res;Vissers_LE_(2016)_Nat_Rev_Genet;Phenolyser;Radboudumc_:_Exome_panels;SysID_primary_ID_genes	8
COX20	ENSG00000203667	1	DisGenNet;Opentarget_textMining;Phenolyser;SysID_candidate_ID_genes	4
COX4I2	ENSG00000131055	20	DisGenNet;HPO;Phenolyser	3
COX6B1	ENSG00000126267	19	DDG2P;DisGenNet;Ilyas_M_(2020)_F1000Res;Phenolyser;Radboudumc_:_Exome_panels;SysID_candidate_ID_genes	6
COX7B	ENSG00000131174	X	DisGenNet;HPO;Ilyas_M_(2020)_F1000Res;Phenolyser;SysID_candidate_ID_genes	5
COX8A	ENSG00000176340	11	DisGenNet;Phenolyser;SysID_candidate_ID_genes	3
CP	ENSG00000047457	3	Fulgent_:_gene_panel;Opentarget_textMining;Phenolyser	3
CPA6	ENSG00000165078	8	Fulgent_:_gene_panel;HPO;IPA;Opentarget_genetic_association;Opentarget_textMining;SysID_candidate_ID_genes	6
CPE	ENSG00000109472	4	DisGenNet;HPO;Opentarget_textMining;Radboudumc_:_Exome_panels;SysID_primary_ID_genes	5
CPLANE1	ENSG00000197603	5	DisGenNet;HPO;Opentarget_textMining;Radboudumc_:_Exome_panels;SysID_primary_ID_genes	5
CPLX1	ENSG00000168993	4	DisGenNet;HPO;Opentarget_textMining;Phenolyser;Radboudumc_:_Exome_panels;SysID_primary_ID_genes	6
CPS1	ENSG00000021826	2	DDG2P;DisGenNet;Fulgent_:_gene_panel;HPO;IPA;Ilyas_M_(2020)_F1000Res;Vissers_LE_(2016)_Nat_Rev_Genet;Opentarget_genetic_association;Phenolyser;Radboudumc_:_Exome_panels;SysID_candidate_ID_genes	11
CRADD	ENSG00000169372	12	DDG2P;DisGenNet;Fulgent_:_gene_panel;HPO;IPA;Ilyas_M_(2020)_F1000Res;Vissers_LE_(2016)_Nat_Rev_Genet;OMIM-2022-12-09;Opentarget_genetic_association;Opentarget_textMining;Orphanet;Phenolyser;Radboudumc_:_Exome_panels;SysID_primary_ID_genes	14
CRB1	ENSG00000134376	1	DisGenNet;HPO;IPA;Ilyas_M_(2020)_F1000Res;Opentarget_genetic_association;Phenolyser	6
CRB2	ENSG00000148204	9	Ilyas_M_(2020)_F1000Res;Phenolyser;SysID_candidate_ID_genes	3
CRBN	ENSG00000113851	3	DDG2P;DisGenNet;Fulgent_:_gene_panel;HPO;IPA;Ilyas_M_(2020)_F1000Res;Vissers_LE_(2016)_Nat_Rev_Genet;OMIM-2022-12-09;Opentarget_genetic_association;Opentarget_textMining;Orphanet;Phenolyser;Radboudumc_:_Exome_panels;SysID_primary_ID_genes	14
CREBBP	ENSG00000005339	16	DDG2P;DisGenNet;Fulgent_:_gene_panel;HPO;IPA;Coe_B.P_(2019)_Nat_Genet;Ilyas_M_(2020)_F1000Res;Mireia_Coll-TanÃ©_(2019)_Dis_Model_Mech;Vissers_LE_(2016)_Nat_Rev_Genet;Opentarget_genetic_association;Opentarget_textMining;Phenolyser;Radboudumc_:_Exome_panels;SysID_primary_ID_genes	14
CRIPT	ENSG00000119878	2	DisGenNet;HPO;Phenolyser	3
CRKL	ENSG00000099942	22	DisGenNet;HPO;Opentarget_textMining;Phenolyser	4
CRLF1	ENSG00000006016	19	HPO;Phenolyser;Radboudumc_:_Exome_panels;SysID_candidate_ID_genes	4
CRPPA	ENSG00000214960	7	DDG2P;DisGenNet;HPO;IPA;Opentarget_textMining;Orphanet;Radboudumc_:_Exome_panels;SysID_primary_ID_genes	8
CRX	ENSG00000105392	19	DisGenNet;HPO;Ilyas_M_(2020)_F1000Res;Phenolyser	4
CSDE1	ENSG00000009307	1	DDG2P;DisGenNet;Opentarget_genetic_association;Opentarget_textMining;Phenolyser;Radboudumc_:_Exome_panels;SysID_primary_ID_genes	7
CSNK1G1	ENSG00000169118	15	Opentarget_genetic_association;Radboudumc_:_Exome_panels;SysID_primary_ID_genes	3
CSNK2A1	ENSG00000101266	20	DisGenNet;Fulgent_:_gene_panel;HPO;IPA;Coe_B.P_(2019)_Nat_Genet;Ilyas_M_(2020)_F1000Res;Phenolyser;Radboudumc_:_Exome_panels;SysID_primary_ID_genes	9
CSNK2B	ENSG00000204435	6	DisGenNet;HPO;IPA;Ilyas_M_(2020)_F1000Res;Opentarget_genetic_association;Opentarget_textMining;Orphanet;Radboudumc_:_Exome_panels;SysID_primary_ID_genes	9
CSPP1	ENSG00000104218	8	DisGenNet;HPO;Ilyas_M_(2020)_F1000Res;Phenolyser;Radboudumc_:_Exome_panels;SysID_primary_ID_genes	6
CSTB	ENSG00000160213	21	DisGenNet;HPO;Ilyas_M_(2020)_F1000Res;Opentarget_genetic_association;Opentarget_textMining;Phenolyser;Radboudumc_:_Exome_panels;SysID_candidate_ID_genes	8
CTBP1	ENSG00000159692	4	DisGenNet;HPO;IPA;Opentarget_genetic_association;Opentarget_textMining;Phenolyser;Radboudumc_:_Exome_panels;SysID_primary_ID_genes	8
CTC1	ENSG00000178971	17	Fulgent_:_gene_panel;Ilyas_M_(2020)_F1000Res;Radboudumc_:_Exome_panels;SysID_candidate_ID_genes	4
CTCF	ENSG00000102974	16	AutDB;DDG2P;DisGenNet;Fulgent_:_gene_panel;HPO;IPA;Coe_B.P_(2019)_Nat_Genet;Ilyas_M_(2020)_F1000Res;Vissers_LE_(2016)_Nat_Rev_Genet;OMIM-2022-12-09;Opentarget_genetic_association;Opentarget_textMining;Phenolyser;Radboudumc_:_Exome_panels;SysID_primary_ID_genes	15
CTDP1	ENSG00000060069	18	DDG2P;DisGenNet;HPO;IPA;Ilyas_M_(2020)_F1000Res;Vissers_LE_(2016)_Nat_Rev_Genet;Phenolyser;Radboudumc_:_Exome_panels;SysID_primary_ID_genes	9
CTNNA2	ENSG00000066032	2	DDG2P;DisGenNet;HPO;IPA;Radboudumc_:_Exome_panels;SysID_primary_ID_genes	6
CTNNB1	ENSG00000168036	3	AutDB;DisGenNet;Fulgent_:_gene_panel;HPO;IPA;Coe_B.P_(2019)_Nat_Genet;Ilyas_M_(2020)_F1000Res;Vissers_LE_(2016)_Nat_Rev_Genet;Opentarget_genetic_association;Opentarget_textMining;Orphanet;Phenolyser;Radboudumc_:_Exome_panels;SysID_primary_ID_genes	14
CTNND1	ENSG00000198561	11	Opentarget_textMining;Radboudumc_:_Exome_panels;SysID_primary_ID_genes	3
CTNND2	ENSG00000169862	5	DisGenNet;Fulgent_:_gene_panel;HPO;Opentarget_textMining;Phenolyser;Radboudumc_:_Exome_panels;SysID_candidate_ID_genes	7
CTSA	ENSG00000064601	20	DDG2P;DisGenNet;Fulgent_:_gene_panel;HPO;Ilyas_M_(2020)_F1000Res;Vissers_LE_(2016)_Nat_Rev_Genet;Opentarget_genetic_association;Phenolyser;Radboudumc_:_Exome_panels;SysID_candidate_ID_genes	10
CTSD	ENSG00000117984	11	DDG2P;DisGenNet;Fulgent_:_gene_panel;HPO;Ilyas_M_(2020)_F1000Res;Vissers_LE_(2016)_Nat_Rev_Genet;Opentarget_genetic_association;Phenolyser;Radboudumc_:_Exome_panels;SysID_candidate_ID_genes	10
CTSF	ENSG00000174080	11	Fulgent_:_gene_panel;Ilyas_M_(2020)_F1000Res;Phenolyser	3
CTTNBP2	ENSG00000077063	7	Vissers_LE_(2016)_Nat_Rev_Genet;Radboudumc_:_Exome_panels;SysID_candidate_ID_genes	3
CUL3	ENSG00000036257	2	HPO;IPA;Coe_B.P_(2019)_Nat_Genet;Opentarget_genetic_association;Opentarget_textMining;Radboudumc_:_Exome_panels;SysID_primary_ID_genes	7
CUL4B	ENSG00000158290	X	DDG2P;DisGenNet;Fulgent_:_gene_panel;HPO;IPA;Ilyas_M_(2020)_F1000Res;Vissers_LE_(2016)_Nat_Rev_Genet;OMIM-2022-12-09;Opentarget_genetic_association;Opentarget_textMining;Orphanet;Phenolyser;Radboudumc_:_Exome_panels;SysID_primary_ID_genes	14
CUX1	ENSG00000257923	7	DisGenNet;HPO;IPA;OMIM-2022-12-09;Opentarget_genetic_association;Orphanet;Radboudumc_:_Exome_panels;SysID_primary_ID_genes	8
CUX2	ENSG00000111249	12	DisGenNet;HPO;Ilyas_M_(2020)_F1000Res;Opentarget_genetic_association;Phenolyser;Radboudumc_:_Exome_panels;SysID_primary_ID_genes	7
CWC27	ENSG00000153015	5	DDG2P;DisGenNet;HPO;Phenolyser;Radboudumc_:_Exome_panels;SysID_primary_ID_genes	6
CWF19L1	ENSG00000095485	10	DisGenNet;HPO;IPA;Opentarget_genetic_association;Opentarget_textMining;Phenolyser;Radboudumc_:_Exome_panels;SysID_primary_ID_genes	8
CYB5A	ENSG00000166347	18	DisGenNet;HPO;IPA	3
CYB5R3	ENSG00000100243	22	DisGenNet;Fulgent_:_gene_panel;HPO;IPA;Ilyas_M_(2020)_F1000Res;Vissers_LE_(2016)_Nat_Rev_Genet;Opentarget_genetic_association;Opentarget_textMining;Phenolyser;Radboudumc_:_Exome_panels;SysID_primary_ID_genes	11
CYFIP1	ENSG00000273749	15	DisGenNet;IPA;Opentarget_textMining;Phenolyser;SysID_candidate_ID_genes	5
CYFIP2	ENSG00000055163	5	DisGenNet;HPO;IPA;Opentarget_genetic_association;Opentarget_textMining;Radboudumc_:_Exome_panels;SysID_primary_ID_genes	7
CYP24A1	ENSG00000019186	20	DisGenNet;HPO;Phenolyser	3
CYP26B1	ENSG00000003137	2	DisGenNet;Opentarget_textMining;SysID_primary_ID_genes	3
CYP27A1	ENSG00000135929	2	DDG2P;DisGenNet;Fulgent_:_gene_panel;HPO;IPA;Ilyas_M_(2020)_F1000Res;Opentarget_genetic_association;Opentarget_textMining;Phenolyser;Radboudumc_:_Exome_panels;SysID_primary_ID_genes	11
CYP2U1	ENSG00000155016	4	DisGenNet;HPO;Ilyas_M_(2020)_F1000Res;Opentarget_genetic_association;Opentarget_textMining;Phenolyser;Radboudumc_:_Exome_panels;SysID_primary_ID_genes	8
D2HGDH	ENSG00000180902	2	DDG2P;DisGenNet;Fulgent_:_gene_panel;HPO;Ilyas_M_(2020)_F1000Res;Vissers_LE_(2016)_Nat_Rev_Genet;Phenolyser;Radboudumc_:_Exome_panels;SysID_primary_ID_genes	9
DACT1	ENSG00000165617	14	DisGenNet;HPO;Phenolyser	3
DAG1	ENSG00000173402	3	DDG2P;DisGenNet;HPO;IPA;Ilyas_M_(2020)_F1000Res;Opentarget_genetic_association;Opentarget_textMining;Phenolyser;Radboudumc_:_Exome_panels;SysID_primary_ID_genes	10
DARS1	ENSG00000115866	2	HPO;Radboudumc_:_Exome_panels;SysID_primary_ID_genes	3
DARS2	ENSG00000117593	1	DisGenNet;Fulgent_:_gene_panel;HPO;Ilyas_M_(2020)_F1000Res;Vissers_LE_(2016)_Nat_Rev_Genet;Radboudumc_:_Exome_panels;SysID_primary_ID_genes	7
DBT	ENSG00000137992	1	DDG2P;DisGenNet;Fulgent_:_gene_panel;HPO;Ilyas_M_(2020)_F1000Res;Vissers_LE_(2016)_Nat_Rev_Genet;Phenolyser;Radboudumc_:_Exome_panels;SysID_primary_ID_genes	9
DCAF17	ENSG00000115827	2	DDG2P;DisGenNet;HPO;IPA;Ilyas_M_(2020)_F1000Res;Vissers_LE_(2016)_Nat_Rev_Genet;Opentarget_textMining;Phenolyser;Radboudumc_:_Exome_panels;SysID_primary_ID_genes	10
DCC	ENSG00000187323	18	DDG2P;DisGenNet;HPO;IPA;Ilyas_M_(2020)_F1000Res;Phenolyser;Radboudumc_:_Exome_panels;SysID_primary_ID_genes	8
DCHS1	ENSG00000166341	11	DisGenNet;HPO;Ilyas_M_(2020)_F1000Res;Phenolyser;Radboudumc_:_Exome_panels;SysID_primary_ID_genes	6
DCPS	ENSG00000110063	11	DisGenNet;HPO;Opentarget_textMining;Orphanet;Radboudumc_:_Exome_panels;SysID_primary_ID_genes	6
DCX	ENSG00000077279	X	DDG2P;DisGenNet;Fulgent_:_gene_panel;HPO;IPA;Ilyas_M_(2020)_F1000Res;Vissers_LE_(2016)_Nat_Rev_Genet;Opentarget_textMining;Phenolyser;Radboudumc_:_Exome_panels;SysID_primary_ID_genes	11
DDB1	ENSG00000167986	11	HPO;Opentarget_genetic_association;Radboudumc_:_Exome_panels;SysID_primary_ID_genes	4
DDB2	ENSG00000134574	11	DisGenNet;HPO;Ilyas_M_(2020)_F1000Res;Phenolyser	4
DDC	ENSG00000132437	7	DDG2P;DisGenNet;HPO;Opentarget_genetic_association;Opentarget_textMining;Phenolyser	6
DDHD2	ENSG00000085788	8	DisGenNet;HPO;Ilyas_M_(2020)_F1000Res;Vissers_LE_(2016)_Nat_Rev_Genet;Opentarget_textMining;Phenolyser;Radboudumc_:_Exome_panels;SysID_primary_ID_genes	8
DDOST	ENSG00000244038	1	IPA;Ilyas_M_(2020)_F1000Res;Opentarget_genetic_association;Phenolyser;SysID_primary_ID_genes	5
DDR2	ENSG00000162733	1	DDG2P;DisGenNet;HPO;Phenolyser	4
DDX11	ENSG00000013573	12	DDG2P;DisGenNet;HPO;Ilyas_M_(2020)_F1000Res;Vissers_LE_(2016)_Nat_Rev_Genet;Opentarget_textMining;Phenolyser;Radboudumc_:_Exome_panels;SysID_candidate_ID_genes	9
DDX23	ENSG00000174243	12	IPA;Opentarget_genetic_association;Radboudumc_:_Exome_panels;SysID_primary_ID_genes	4
DDX3X	ENSG00000215301	X	AutDB;DDG2P;DisGenNet;Fulgent_:_gene_panel;HPO;IPA;Coe_B.P_(2019)_Nat_Genet;Ilyas_M_(2020)_F1000Res;Vissers_LE_(2016)_Nat_Rev_Genet;OMIM-2022-12-09;Opentarget_genetic_association;Opentarget_textMining;Orphanet;Phenolyser;Radboudumc_:_Exome_panels;SysID_primary_ID_genes	16
DDX47	ENSG00000213782	12	IPA;Opentarget_genetic_association;SysID_candidate_ID_genes	3
DDX54	ENSG00000123064	12	DDG2P;IPA;Opentarget_genetic_association;SysID_candidate_ID_genes	4
DDX59	ENSG00000118197	1	DisGenNet;HPO;Ilyas_M_(2020)_F1000Res;Opentarget_textMining;Phenolyser;Radboudumc_:_Exome_panels;SysID_primary_ID_genes	7
DDX6	ENSG00000110367	11	DDG2P;DisGenNet;HPO;IPA;OMIM-2022-12-09;Opentarget_genetic_association;Opentarget_textMining;Orphanet;Radboudumc_:_Exome_panels;SysID_primary_ID_genes	10
DEAF1	ENSG00000177030	11	AutDB;DDG2P;DisGenNet;HPO;IPA;Ilyas_M_(2020)_F1000Res;Vissers_LE_(2016)_Nat_Rev_Genet;Opentarget_genetic_association;Opentarget_textMining;Orphanet;Phenolyser;Radboudumc_:_Exome_panels;SysID_primary_ID_genes	13
DEGS1	ENSG00000143753	1	DisGenNet;HPO;Opentarget_genetic_association	3
DENND5A	ENSG00000184014	11	Ilyas_M_(2020)_F1000Res;Opentarget_genetic_association;Opentarget_textMining;Radboudumc_:_Exome_panels;SysID_primary_ID_genes	5
DEPDC5	ENSG00000100150	22	HPO;IPA;Ilyas_M_(2020)_F1000Res;Opentarget_genetic_association;Opentarget_textMining;Phenolyser;Radboudumc_:_Exome_panels;SysID_primary_ID_genes	8
DGCR2	ENSG00000070413	22	DisGenNet;HPO;Opentarget_textMining;Phenolyser	4
DGCR6	ENSG00000183628	22	DisGenNet;HPO;Phenolyser	3
DGCR8	ENSG00000128191	22	DisGenNet;HPO;IPA;Opentarget_textMining;Phenolyser	5
DHCR24	ENSG00000116133	1	DisGenNet;Fulgent_:_gene_panel;HPO;Ilyas_M_(2020)_F1000Res;Vissers_LE_(2016)_Nat_Rev_Genet;Phenolyser;Radboudumc_:_Exome_panels;SysID_primary_ID_genes	8
DHCR7	ENSG00000172893	11	DDG2P;DisGenNet;Fulgent_:_gene_panel;HPO;Ilyas_M_(2020)_F1000Res;Vissers_LE_(2016)_Nat_Rev_Genet;Opentarget_genetic_association;Opentarget_textMining;Phenolyser;Radboudumc_:_Exome_panels;SysID_primary_ID_genes	11
DHDDS	ENSG00000117682	1	DDG2P;DisGenNet;HPO;Ilyas_M_(2020)_F1000Res;Phenolyser;Radboudumc_:_Exome_panels;SysID_primary_ID_genes	7
DHFR	ENSG00000228716	5	Ilyas_M_(2020)_F1000Res;Vissers_LE_(2016)_Nat_Rev_Genet;Phenolyser;Radboudumc_:_Exome_panels;SysID_primary_ID_genes	5
DHPS	ENSG00000095059	19	DisGenNet;Opentarget_genetic_association;Radboudumc_:_Exome_panels;SysID_primary_ID_genes	4
DHTKD1	ENSG00000181192	10	DDG2P;DisGenNet;Ilyas_M_(2020)_F1000Res;Vissers_LE_(2016)_Nat_Rev_Genet;Phenolyser;Radboudumc_:_Exome_panels;SysID_primary_ID_genes	7
DHX16	ENSG00000204560	6	DDG2P;HPO;Opentarget_genetic_association;Radboudumc_:_Exome_panels;SysID_candidate_ID_genes	5
DHX30	ENSG00000132153	3	DDG2P;DisGenNet;HPO;Ilyas_M_(2020)_F1000Res;Opentarget_genetic_association;Opentarget_textMining;Phenolyser;Radboudumc_:_Exome_panels;SysID_primary_ID_genes	9
DHX34	ENSG00000134815	19	DDG2P;DisGenNet;IPA;Opentarget_genetic_association;SysID_candidate_ID_genes	5
DHX37	ENSG00000150990	12	DDG2P;Opentarget_genetic_association;Opentarget_textMining;Radboudumc_:_Exome_panels;SysID_candidate_ID_genes	5
DIAPH1	ENSG00000131504	5	DisGenNet;HPO;Ilyas_M_(2020)_F1000Res;Opentarget_genetic_association;Radboudumc_:_Exome_panels;SysID_primary_ID_genes	6
DICER1	ENSG00000100697	14	DisGenNet;HPO;Opentarget_textMining;Orphanet;Phenolyser	5
DIO2	ENSG00000211448	14	DisGenNet;Opentarget_textMining;Phenolyser	3
DIP2B	ENSG00000066084	12	DDG2P;DisGenNet;HPO;IPA;Ilyas_M_(2020)_F1000Res;Vissers_LE_(2016)_Nat_Rev_Genet;OMIM-2022-12-09;Opentarget_genetic_association;Opentarget_textMining;Phenolyser;Radboudumc_:_Exome_panels;SysID_primary_ID_genes	12
DIS3L2	ENSG00000144535	2	DisGenNet;HPO;Ilyas_M_(2020)_F1000Res;Phenolyser;Radboudumc_:_Exome_panels;SysID_primary_ID_genes	6
DISC1	ENSG00000162946	1	DisGenNet;Opentarget_textMining;Phenolyser	3
DISP1	ENSG00000154309	1	DisGenNet;HPO;Phenolyser;SysID_candidate_ID_genes	4
DKC1	ENSG00000130826	X	DisGenNet;Fulgent_:_gene_panel;HPO;Ilyas_M_(2020)_F1000Res;Vissers_LE_(2016)_Nat_Rev_Genet;Phenolyser;Radboudumc_:_Exome_panels;SysID_primary_ID_genes	8
DLAT	ENSG00000150768	11	DDG2P;DisGenNet;HPO;Ilyas_M_(2020)_F1000Res;Phenolyser;Radboudumc_:_Exome_panels;SysID_primary_ID_genes	7
DLD	ENSG00000091140	7	DDG2P;DisGenNet;IPA;Ilyas_M_(2020)_F1000Res;Vissers_LE_(2016)_Nat_Rev_Genet;Phenolyser;Radboudumc_:_Exome_panels;SysID_primary_ID_genes	8
DLG2	ENSG00000150672	11	DisGenNet;Ilyas_M_(2020)_F1000Res;Opentarget_textMining;SysID_candidate_ID_genes	4
DLG3	ENSG00000082458	X	DisGenNet;Fulgent_:_gene_panel;HPO;IPA;Ilyas_M_(2020)_F1000Res;Vissers_LE_(2016)_Nat_Rev_Genet;OMIM-2022-12-09;Opentarget_genetic_association;Opentarget_textMining;Orphanet;Phenolyser;Radboudumc_:_Exome_panels;SysID_primary_ID_genes	13
DLG4	ENSG00000132535	17	DDG2P;DisGenNet;HPO;IPA;Coe_B.P_(2019)_Nat_Genet;Ilyas_M_(2020)_F1000Res;OMIM-2022-12-09;Opentarget_genetic_association;Opentarget_textMining;Orphanet;Phenolyser;Radboudumc_:_Exome_panels;SysID_primary_ID_genes	13
DLK1	ENSG00000185559	14	DisGenNet;HPO;Opentarget_textMining	3
DLL1	ENSG00000198719	6	DDG2P;DisGenNet;HPO;Opentarget_genetic_association;Orphanet;Phenolyser;Radboudumc_:_Exome_panels;SysID_primary_ID_genes	8
DLL3	ENSG00000090932	19	DisGenNet;HPO;Ilyas_M_(2020)_F1000Res;Phenolyser	4
DLL4	ENSG00000128917	15	DisGenNet;HPO;Ilyas_M_(2020)_F1000Res;Phenolyser;SysID_candidate_ID_genes	5
DLX5	ENSG00000105880	7	DisGenNet;HPO;Opentarget_textMining;Phenolyser	4
DMD	ENSG00000198947	X	DDG2P;DisGenNet;Fulgent_:_gene_panel;HPO;IPA;Ilyas_M_(2020)_F1000Res;Vissers_LE_(2016)_Nat_Rev_Genet;Opentarget_genetic_association;Opentarget_textMining;Orphanet;Phenolyser;Radboudumc_:_Exome_panels;SysID_primary_ID_genes	13
DMPK	ENSG00000104936	19	DDG2P;DisGenNet;HPO;Vissers_LE_(2016)_Nat_Rev_Genet;Opentarget_textMining;Phenolyser;Radboudumc_:_Exome_panels;SysID_primary_ID_genes	8
DMXL2	ENSG00000104093	15	DisGenNet;HPO;IPA;Phenolyser;Radboudumc_:_Exome_panels;SysID_primary_ID_genes	6
DNA2	ENSG00000138346	10	DisGenNet;HPO;Phenolyser;SysID_candidate_ID_genes	4
DNAH3	ENSG00000158486	16	IPA;Opentarget_genetic_association;SysID_candidate_ID_genes	3
DNAJA1	ENSG00000086061	9	DisGenNet;Opentarget_textMining;SysID_candidate_ID_genes	3
DNAJC12	ENSG00000108176	10	DDG2P;DisGenNet;HPO;Ilyas_M_(2020)_F1000Res;Opentarget_textMining;Phenolyser;Radboudumc_:_Exome_panels;SysID_primary_ID_genes	8
DNAJC19	ENSG00000205981	3	DisGenNet;HPO;Ilyas_M_(2020)_F1000Res;Vissers_LE_(2016)_Nat_Rev_Genet;Phenolyser;Radboudumc_:_Exome_panels;SysID_primary_ID_genes	7
DNAJC21	ENSG00000168724	5	DisGenNet;HPO;Phenolyser	3
DNAJC3	ENSG00000102580	13	DisGenNet;HPO;Phenolyser	3
DNAJC6	ENSG00000116675	1	DisGenNet;HPO;Opentarget_textMining;Phenolyser;SysID_candidate_ID_genes	5
DNAL4	ENSG00000100246	22	DisGenNet;HPO;Phenolyser	3
DNM1	ENSG00000106976	9	DisGenNet;Fulgent_:_gene_panel;HPO;Coe_B.P_(2019)_Nat_Genet;Ilyas_M_(2020)_F1000Res;Vissers_LE_(2016)_Nat_Rev_Genet;Opentarget_textMining;Phenolyser;Radboudumc_:_Exome_panels;SysID_primary_ID_genes	10
DNM1L	ENSG00000087470	12	DisGenNet;HPO;Opentarget_textMining;Phenolyser	4
DNMT3A	ENSG00000119772	2	DDG2P;DisGenNet;Fulgent_:_gene_panel;HPO;IPA;Coe_B.P_(2019)_Nat_Genet;Ilyas_M_(2020)_F1000Res;Vissers_LE_(2016)_Nat_Rev_Genet;Opentarget_genetic_association;Opentarget_textMining;Phenolyser;Radboudumc_:_Exome_panels;SysID_primary_ID_genes	13
DNMT3B	ENSG00000088305	20	DDG2P;DisGenNet;HPO;IPA;Ilyas_M_(2020)_F1000Res;Vissers_LE_(2016)_Nat_Rev_Genet;Opentarget_textMining;Phenolyser;Radboudumc_:_Exome_panels;SysID_primary_ID_genes	10
DOCK3	ENSG00000088538	3	HPO;IPA;OMIM-2022-12-09;Opentarget_textMining;Orphanet;Radboudumc_:_Exome_panels;SysID_candidate_ID_genes	7
DOCK6	ENSG00000130158	19	DisGenNet;HPO;Ilyas_M_(2020)_F1000Res;Opentarget_genetic_association;Opentarget_textMining;Phenolyser;Radboudumc_:_Exome_panels;SysID_primary_ID_genes	8
DOCK7	ENSG00000116641	1	HPO;Ilyas_M_(2020)_F1000Res;Opentarget_textMining;Orphanet;Radboudumc_:_Exome_panels;SysID_primary_ID_genes	6
DOCK8	ENSG00000107099	9	DisGenNet;HPO;IPA;Ilyas_M_(2020)_F1000Res;Vissers_LE_(2016)_Nat_Rev_Genet;Opentarget_genetic_association;Opentarget_textMining;Orphanet;Phenolyser;SysID_candidate_ID_genes	10
DOHH	ENSG00000129932	19	HPO;Orphanet;SysID_primary_ID_genes	3
DOLK	ENSG00000175283	9	HPO;Ilyas_M_(2020)_F1000Res;Opentarget_textMining;Phenolyser;Radboudumc_:_Exome_panels;SysID_candidate_ID_genes	6
DONSON	ENSG00000159147	21	HPO;Opentarget_genetic_association;Phenolyser;Radboudumc_:_Exome_panels;SysID_primary_ID_genes	5
DPAGT1	ENSG00000172269	11	DisGenNet;HPO;Ilyas_M_(2020)_F1000Res;Vissers_LE_(2016)_Nat_Rev_Genet;Phenolyser;Radboudumc_:_Exome_panels;SysID_primary_ID_genes	7
DPF2	ENSG00000133884	11	DDG2P;DisGenNet;HPO;IPA;Ilyas_M_(2020)_F1000Res;Opentarget_genetic_association;Phenolyser;Radboudumc_:_Exome_panels;SysID_primary_ID_genes	9
DPH1	ENSG00000108963	17	DisGenNet;HPO;Opentarget_textMining;Orphanet;Phenolyser;Radboudumc_:_Exome_panels;SysID_primary_ID_genes	7
DPM1	ENSG00000000419	20	Ilyas_M_(2020)_F1000Res;Vissers_LE_(2016)_Nat_Rev_Genet;Opentarget_genetic_association;Phenolyser;Radboudumc_:_Exome_panels;SysID_primary_ID_genes	6
DPM2	ENSG00000136908	9	Orphanet;Phenolyser;Radboudumc_:_Exome_panels;SysID_candidate_ID_genes	4
DPM3	ENSG00000179085	1	HPO;IPA;Ilyas_M_(2020)_F1000Res;OMIM-2022-12-09;Phenolyser;SysID_candidate_ID_genes	6
DPP6	ENSG00000130226	7	DisGenNet;Fulgent_:_gene_panel;HPO;IPA;Ilyas_M_(2020)_F1000Res;Vissers_LE_(2016)_Nat_Rev_Genet;OMIM-2022-12-09;Opentarget_genetic_association;Opentarget_textMining;Phenolyser;Radboudumc_:_Exome_panels;SysID_primary_ID_genes	12
DPYD	ENSG00000188641	1	DisGenNet;Fulgent_:_gene_panel;HPO;Ilyas_M_(2020)_F1000Res;Vissers_LE_(2016)_Nat_Rev_Genet;Opentarget_genetic_association;Opentarget_textMining;Phenolyser;Radboudumc_:_Exome_panels;SysID_primary_ID_genes	10
DPYS	ENSG00000147647	8	DisGenNet;HPO;Phenolyser;Radboudumc_:_Exome_panels	4
DPYSL5	ENSG00000157851	2	HPO;Orphanet;Radboudumc_:_Exome_panels;SysID_primary_ID_genes	4
DRD2	ENSG00000149295	11	DisGenNet;IPA;Opentarget_textMining	3
DRD4	ENSG00000069696	11	DisGenNet;IPA;Opentarget_textMining	3
DSCAM	ENSG00000171587	21	DisGenNet;IPA;Opentarget_genetic_association;Opentarget_textMining;SysID_primary_ID_genes	5
DSCAML1	ENSG00000177103	11	IPA;Opentarget_genetic_association;Opentarget_textMining	3
DSG4	ENSG00000175065	18	DisGenNet;HPO;Phenolyser	3
DST	ENSG00000151914	6	IPA;Vissers_LE_(2016)_Nat_Rev_Genet;Opentarget_textMining;SysID_candidate_ID_genes	4
DTYMK	ENSG00000168393	2	HPO;Opentarget_genetic_association;Opentarget_textMining;SysID_candidate_ID_genes	4
DUOX2	ENSG00000140279	15	DisGenNet;HPO;Phenolyser;SysID_candidate_ID_genes	4
DUOXA2	ENSG00000140274	15	DisGenNet;HPO;Phenolyser;SysID_candidate_ID_genes	4
DVL1	ENSG00000107404	1	DisGenNet;HPO;Ilyas_M_(2020)_F1000Res;Opentarget_textMining;Phenolyser	5
DVL3	ENSG00000161202	3	DisGenNet;HPO;Phenolyser;SysID_candidate_ID_genes	4
DYM	ENSG00000141627	18	DisGenNet;HPO;Ilyas_M_(2020)_F1000Res;Vissers_LE_(2016)_Nat_Rev_Genet;Opentarget_textMining;Phenolyser;Radboudumc_:_Exome_panels;SysID_primary_ID_genes	8
DYNC1H1	ENSG00000197102	14	DisGenNet;Fulgent_:_gene_panel;HPO;IPA;Coe_B.P_(2019)_Nat_Genet;Ilyas_M_(2020)_F1000Res;Vissers_LE_(2016)_Nat_Rev_Genet;OMIM-2022-12-09;Opentarget_genetic_association;Opentarget_textMining;Orphanet;Phenolyser;Radboudumc_:_Exome_panels;SysID_primary_ID_genes	14
DYNC1I2	ENSG00000077380	2	DisGenNet;HPO;Opentarget_textMining;Radboudumc_:_Exome_panels;SysID_primary_ID_genes	5
DYNC2H1	ENSG00000187240	11	IPA;Ilyas_M_(2020)_F1000Res;Opentarget_genetic_association	3
DYNC2LI1	ENSG00000138036	2	DisGenNet;HPO;Phenolyser	3
DYRK1A	ENSG00000157540	21	AutDB;DisGenNet;Fulgent_:_gene_panel;HPO;IPA;Coe_B.P_(2019)_Nat_Genet;Ilyas_M_(2020)_F1000Res;Mireia_Coll-TanÃ©_(2019)_Dis_Model_Mech;Vissers_LE_(2016)_Nat_Rev_Genet;OMIM-2022-12-09;Opentarget_genetic_association;Opentarget_textMining;Orphanet;Phenolyser;Radboudumc_:_Exome_panels;SysID_primary_ID_genes	16
EARS2	ENSG00000103356	16	DisGenNet;HPO;Opentarget_genetic_association;Opentarget_textMining;Phenolyser	5
EBF3	ENSG00000108001	10	DDG2P;DisGenNet;HPO;IPA;Coe_B.P_(2019)_Nat_Genet;Ilyas_M_(2020)_F1000Res;Opentarget_genetic_association;Opentarget_textMining;Phenolyser;Radboudumc_:_Exome_panels;SysID_primary_ID_genes	11
EBP	ENSG00000147155	X	DDG2P;DisGenNet;Fulgent_:_gene_panel;HPO;Ilyas_M_(2020)_F1000Res;Vissers_LE_(2016)_Nat_Rev_Genet;Phenolyser;Radboudumc_:_Exome_panels;SysID_primary_ID_genes	9
ECE1	ENSG00000117298	1	DisGenNet;HPO;Phenolyser	3
ECHS1	ENSG00000127884	10	DisGenNet;HPO;Opentarget_textMining;Phenolyser;Radboudumc_:_Exome_panels;SysID_primary_ID_genes	6
EDC3	ENSG00000179151	15	DisGenNet;HPO;IPA;Ilyas_M_(2020)_F1000Res;OMIM-2022-12-09;Opentarget_textMining;Orphanet;Phenolyser;Radboudumc_:_Exome_panels;SysID_candidate_ID_genes	10
EDEM3	ENSG00000116406	1	HPO;Orphanet;Radboudumc_:_Exome_panels;SysID_primary_ID_genes	4
EDN3	ENSG00000124205	20	DisGenNet;HPO;Phenolyser	3
EDNRB	ENSG00000136160	13	DisGenNet;HPO;Phenolyser	3
EED	ENSG00000074266	11	DDG2P;DisGenNet;HPO;IPA;Ilyas_M_(2020)_F1000Res;Opentarget_textMining;Phenolyser;Radboudumc_:_Exome_panels;SysID_primary_ID_genes	9
EEF1A2	ENSG00000101210	20	DisGenNet;HPO;IPA;Coe_B.P_(2019)_Nat_Genet;Ilyas_M_(2020)_F1000Res;OMIM-2022-12-09;Opentarget_genetic_association;Opentarget_textMining;Orphanet;Phenolyser;Radboudumc_:_Exome_panels;SysID_primary_ID_genes	12
EEF1B2	ENSG00000114942	2	DisGenNet;IPA;Ilyas_M_(2020)_F1000Res;Opentarget_genetic_association;Opentarget_textMining;Orphanet;SysID_primary_ID_genes	7
EEF1D	ENSG00000104529	8	DisGenNet;IPA;Opentarget_textMining;SysID_candidate_ID_genes	4
EFL1	ENSG00000140598	15	DisGenNet;HPO;SysID_primary_ID_genes	3
EFNB1	ENSG00000090776	X	DisGenNet;Fulgent_:_gene_panel;HPO;Opentarget_textMining;Phenolyser;SysID_candidate_ID_genes	6
EFNB2	ENSG00000125266	13	DisGenNet;Opentarget_textMining;Radboudumc_:_Exome_panels;SysID_candidate_ID_genes	4
EFTUD2	ENSG00000108883	17	DisGenNet;Fulgent_:_gene_panel;HPO;IPA;Coe_B.P_(2019)_Nat_Genet;Ilyas_M_(2020)_F1000Res;Vissers_LE_(2016)_Nat_Rev_Genet;Opentarget_textMining;Phenolyser;Radboudumc_:_Exome_panels;SysID_primary_ID_genes	11
EGF	ENSG00000138798	4	DisGenNet;HPO;Orphanet;Phenolyser	4
EHMT1	ENSG00000181090	9	DDG2P;DisGenNet;Fulgent_:_gene_panel;HPO;IPA;Coe_B.P_(2019)_Nat_Genet;Ilyas_M_(2020)_F1000Res;Mireia_Coll-TanÃ©_(2019)_Dis_Model_Mech;Vissers_LE_(2016)_Nat_Rev_Genet;Opentarget_genetic_association;Opentarget_textMining;Phenolyser;Radboudumc_:_Exome_panels;SysID_primary_ID_genes	14
EI24	ENSG00000149547	11	IPA;Opentarget_genetic_association;SysID_candidate_ID_genes	3
EIF2AK2	ENSG00000055332	2	HPO;Radboudumc_:_Exome_panels;SysID_primary_ID_genes	3
EIF2AK3	ENSG00000172071	2	DisGenNet;HPO;Ilyas_M_(2020)_F1000Res;Vissers_LE_(2016)_Nat_Rev_Genet;Opentarget_textMining;Phenolyser;Radboudumc_:_Exome_panels;SysID_primary_ID_genes	8
EIF2S3	ENSG00000130741	X	DDG2P;DisGenNet;Fulgent_:_gene_panel;HPO;IPA;Ilyas_M_(2020)_F1000Res;Opentarget_textMining;Phenolyser;Radboudumc_:_Exome_panels;SysID_primary_ID_genes	10
EIF3F	ENSG00000175390	11	DDG2P;DisGenNet;IPA;Ilyas_M_(2020)_F1000Res;OMIM-2022-12-09;Opentarget_genetic_association;Opentarget_textMining;Radboudumc_:_Exome_panels;SysID_primary_ID_genes	9
EIF4A3	ENSG00000141543	17	DisGenNet;Ilyas_M_(2020)_F1000Res;Opentarget_genetic_association;Radboudumc_:_Exome_panels;SysID_primary_ID_genes	5
EIF4E	ENSG00000151247	4	DisGenNet;IPA;Phenolyser	3
EIF5A	ENSG00000132507	17	Opentarget_textMining;Orphanet;Radboudumc_:_Exome_panels;SysID_primary_ID_genes	4
ELAC2	ENSG00000006744	17	DisGenNet;Ilyas_M_(2020)_F1000Res;Opentarget_textMining;Radboudumc_:_Exome_panels;SysID_primary_ID_genes	5
ELMO2	ENSG00000062598	20	DisGenNet;HPO;Phenolyser;SysID_candidate_ID_genes	4
ELN	ENSG00000049540	7	DisGenNet;HPO;Ilyas_M_(2020)_F1000Res;Opentarget_textMining;Phenolyser	5
ELOVL4	ENSG00000118402	6	DDG2P;DisGenNet;Fulgent_:_gene_panel;HPO;IPA;Ilyas_M_(2020)_F1000Res;Vissers_LE_(2016)_Nat_Rev_Genet;OMIM-2022-12-09;Opentarget_textMining;Orphanet;Phenolyser;Radboudumc_:_Exome_panels;SysID_primary_ID_genes	13
ELP2	ENSG00000134759	18	AutDB;DisGenNet;HPO;IPA;Ilyas_M_(2020)_F1000Res;OMIM-2022-12-09;Opentarget_genetic_association;Opentarget_textMining;Phenolyser;Radboudumc_:_Exome_panels;SysID_primary_ID_genes	11
ELP4	ENSG00000109911	11	DisGenNet;IPA;Opentarget_textMining	3
EMC1	ENSG00000127463	1	DisGenNet;HPO;IPA;Opentarget_textMining;Phenolyser;Radboudumc_:_Exome_panels;SysID_primary_ID_genes	7
EMC10	ENSG00000161671	19	HPO;IPA;Opentarget_genetic_association;Opentarget_textMining;Orphanet;Radboudumc_:_Exome_panels;SysID_primary_ID_genes	7
EMG1	ENSG00000126749	12	DisGenNet;HPO;Phenolyser	3
EML1	ENSG00000066629	14	DisGenNet;HPO;Ilyas_M_(2020)_F1000Res;Opentarget_textMining;Phenolyser;Radboudumc_:_Exome_panels;SysID_primary_ID_genes	7
EMX2	ENSG00000170370	10	Ilyas_M_(2020)_F1000Res;Vissers_LE_(2016)_Nat_Rev_Genet;Opentarget_genetic_association;Radboudumc_:_Exome_panels;SysID_primary_ID_genes	5
ENTPD1	ENSG00000138185	10	DisGenNet;HPO;IPA;Ilyas_M_(2020)_F1000Res;Phenolyser;Radboudumc_:_Exome_panels;SysID_primary_ID_genes	7
EOGT	ENSG00000163378	3	DisGenNet;HPO;Ilyas_M_(2020)_F1000Res;Phenolyser;SysID_candidate_ID_genes	5
EP300	ENSG00000100393	22	DDG2P;DisGenNet;Fulgent_:_gene_panel;HPO;IPA;Coe_B.P_(2019)_Nat_Genet;Ilyas_M_(2020)_F1000Res;Vissers_LE_(2016)_Nat_Rev_Genet;Opentarget_genetic_association;Opentarget_textMining;Phenolyser;Radboudumc_:_Exome_panels;SysID_primary_ID_genes	13
EPB41L1	ENSG00000088367	20	DDG2P;DisGenNet;HPO;IPA;Ilyas_M_(2020)_F1000Res;Vissers_LE_(2016)_Nat_Rev_Genet;OMIM-2022-12-09;Opentarget_genetic_association;Opentarget_textMining;Orphanet;Phenolyser;SysID_candidate_ID_genes	12
EPG5	ENSG00000152223	18	DisGenNet;HPO;Ilyas_M_(2020)_F1000Res;Phenolyser;Radboudumc_:_Exome_panels;SysID_primary_ID_genes	6
EPHA7	ENSG00000135333	6	Opentarget_genetic_association;Radboudumc_:_Exome_panels;SysID_candidate_ID_genes	3
ERBB2	ENSG00000141736	17	HPO;IPA;Phenolyser	3
ERBB4	ENSG00000178568	2	DisGenNet;HPO;Opentarget_genetic_association;Opentarget_textMining;Orphanet;SysID_candidate_ID_genes	6
ERCC1	ENSG00000012061	19	HPO;Ilyas_M_(2020)_F1000Res;Phenolyser;Radboudumc_:_Exome_panels;SysID_primary_ID_genes	5
ERCC2	ENSG00000104884	19	DDG2P;DisGenNet;Fulgent_:_gene_panel;HPO;IPA;Ilyas_M_(2020)_F1000Res;Vissers_LE_(2016)_Nat_Rev_Genet;Phenolyser;Radboudumc_:_Exome_panels;SysID_primary_ID_genes	10
ERCC3	ENSG00000163161	2	DDG2P;DisGenNet;Fulgent_:_gene_panel;HPO;IPA;Ilyas_M_(2020)_F1000Res;Vissers_LE_(2016)_Nat_Rev_Genet;Phenolyser;Radboudumc_:_Exome_panels;SysID_primary_ID_genes	10
ERCC4	ENSG00000175595	16	DDG2P;DisGenNet;Fulgent_:_gene_panel;HPO;Ilyas_M_(2020)_F1000Res;Phenolyser;SysID_primary_ID_genes	7
ERCC5	ENSG00000134899	13	DisGenNet;Fulgent_:_gene_panel;HPO;Ilyas_M_(2020)_F1000Res;Vissers_LE_(2016)_Nat_Rev_Genet;Phenolyser;Radboudumc_:_Exome_panels;SysID_primary_ID_genes	8
ERCC6	ENSG00000225830	10	DDG2P;DisGenNet;Fulgent_:_gene_panel;HPO;IPA;Ilyas_M_(2020)_F1000Res;Vissers_LE_(2016)_Nat_Rev_Genet;Opentarget_textMining;Phenolyser;Radboudumc_:_Exome_panels;SysID_primary_ID_genes	11
ERCC8	ENSG00000049167	5	DDG2P;DisGenNet;Fulgent_:_gene_panel;HPO;Ilyas_M_(2020)_F1000Res;Vissers_LE_(2016)_Nat_Rev_Genet;Opentarget_textMining;Phenolyser;Radboudumc_:_Exome_panels;SysID_primary_ID_genes	10
ERF	ENSG00000105722	19	DisGenNet;Ilyas_M_(2020)_F1000Res;Phenolyser;SysID_primary_ID_genes	4
ERI1	ENSG00000104626	8	DisGenNet;Opentarget_genetic_association;Opentarget_textMining	3
ERLIN2	ENSG00000147475	8	DisGenNet;HPO;IPA;Ilyas_M_(2020)_F1000Res;Vissers_LE_(2016)_Nat_Rev_Genet;Opentarget_genetic_association;Opentarget_textMining;Orphanet;Phenolyser;Radboudumc_:_Exome_panels;SysID_primary_ID_genes	11
ERMARD	ENSG00000130023	6	DisGenNet;HPO;Ilyas_M_(2020)_F1000Res;Opentarget_textMining;Phenolyser;SysID_candidate_ID_genes	6
ESCO2	ENSG00000171320	8	DDG2P;DisGenNet;HPO;Ilyas_M_(2020)_F1000Res;Vissers_LE_(2016)_Nat_Rev_Genet;Opentarget_textMining;Phenolyser;Radboudumc_:_Exome_panels;SysID_primary_ID_genes	9
ESS2	ENSG00000100056	22	DisGenNet;HPO;Opentarget_textMining	3
ETFB	ENSG00000105379	19	Ilyas_M_(2020)_F1000Res;Vissers_LE_(2016)_Nat_Rev_Genet;Radboudumc_:_Exome_panels	3
ETHE1	ENSG00000105755	19	DDG2P;DisGenNet;HPO;Ilyas_M_(2020)_F1000Res;Vissers_LE_(2016)_Nat_Rev_Genet;Phenolyser;Radboudumc_:_Exome_panels;SysID_primary_ID_genes	8
EVC	ENSG00000072840	4	DDG2P;DisGenNet;HPO;Ilyas_M_(2020)_F1000Res;Phenolyser	5
EVC2	ENSG00000173040	4	DDG2P;DisGenNet;HPO;Ilyas_M_(2020)_F1000Res;Phenolyser	5
EXOC2	ENSG00000112685	6	Opentarget_genetic_association;Radboudumc_:_Exome_panels;SysID_candidate_ID_genes	3
EXOC6B	ENSG00000144036	2	DisGenNet;HPO;Opentarget_textMining	3
EXOC7	ENSG00000182473	17	HPO;Opentarget_genetic_association;Opentarget_textMining	3
EXOSC2	ENSG00000130713	9	DisGenNet;HPO;Opentarget_textMining;Phenolyser;Radboudumc_:_Exome_panels;SysID_primary_ID_genes	6
EXOSC3	ENSG00000107371	9	DDG2P;Ilyas_M_(2020)_F1000Res;Vissers_LE_(2016)_Nat_Rev_Genet;Opentarget_textMining;Phenolyser;Radboudumc_:_Exome_panels;SysID_primary_ID_genes	7
EXOSC8	ENSG00000120699	13	DisGenNet;HPO;Phenolyser	3
EXOSC9	ENSG00000123737	4	DisGenNet;HPO;Phenolyser	3
EXT1	ENSG00000182197	8	DDG2P;DisGenNet;HPO;Opentarget_textMining;Phenolyser	5
EXT2	ENSG00000151348	11	DisGenNet;HPO;Ilyas_M_(2020)_F1000Res;Opentarget_textMining;Phenolyser;SysID_primary_ID_genes	6
EXTL3	ENSG00000012232	8	DisGenNet;HPO;Ilyas_M_(2020)_F1000Res;Opentarget_textMining;Phenolyser;Radboudumc_:_Exome_panels;SysID_primary_ID_genes	7
EYA1	ENSG00000104313	8	DDG2P;DisGenNet;HPO;Ilyas_M_(2020)_F1000Res;Phenolyser	5
EYS	ENSG00000188107	6	DisGenNet;HPO;Phenolyser	3
EZH2	ENSG00000106462	7	DDG2P;DisGenNet;Fulgent_:_gene_panel;HPO;Ilyas_M_(2020)_F1000Res;Vissers_LE_(2016)_Nat_Rev_Genet;Opentarget_textMining;Phenolyser;Radboudumc_:_Exome_panels;SysID_primary_ID_genes	10
EZR	ENSG00000092820	6	DisGenNet;HPO;Opentarget_textMining;Orphanet;SysID_candidate_ID_genes	5
FA2H	ENSG00000103089	16	DisGenNet;HPO;Ilyas_M_(2020)_F1000Res;Opentarget_textMining;Phenolyser;Radboudumc_:_Exome_panels;SysID_candidate_ID_genes	7
FAAH2	ENSG00000165591	X	Fulgent_:_gene_panel;Ilyas_M_(2020)_F1000Res;Opentarget_genetic_association;Opentarget_textMining;SysID_candidate_ID_genes	5
FAM111A	ENSG00000166801	11	DisGenNet;HPO;Phenolyser	3
FAM120C	ENSG00000184083	X	DisGenNet;Ilyas_M_(2020)_F1000Res;Opentarget_textMining;SysID_candidate_ID_genes	4
FAM126A	ENSG00000122591	7	DDG2P;DisGenNet;Fulgent_:_gene_panel;IPA;Ilyas_M_(2020)_F1000Res;Vissers_LE_(2016)_Nat_Rev_Genet;Phenolyser;Radboudumc_:_Exome_panels;SysID_primary_ID_genes	9
FAM149B1	ENSG00000138286	10	DDG2P;DisGenNet;HPO;Radboudumc_:_Exome_panels;SysID_primary_ID_genes	5
FAM161A	ENSG00000170264	2	DisGenNet;HPO;Ilyas_M_(2020)_F1000Res;Phenolyser	4
FAM183A	ENSG00000186973	1	DisGenNet;Opentarget_textMining;SysID_candidate_ID_genes	3
FAM20C	ENSG00000177706	7	DisGenNet;HPO;Opentarget_textMining;Phenolyser	4
FAM50A	ENSG00000071859	X	HPO;IPA;OMIM-2022-12-09;Opentarget_genetic_association;Orphanet;Radboudumc_:_Exome_panels;SysID_primary_ID_genes	7
FANCA	ENSG00000187741	16	DDG2P;DisGenNet;HPO;Ilyas_M_(2020)_F1000Res;Phenolyser;SysID_candidate_ID_genes	6
FANCB	ENSG00000181544	X	DisGenNet;Fulgent_:_gene_panel;HPO;Phenolyser;SysID_candidate_ID_genes	5
FANCC	ENSG00000158169	9	DDG2P;DisGenNet;HPO;Ilyas_M_(2020)_F1000Res;Phenolyser;SysID_candidate_ID_genes	6
FANCD2	ENSG00000144554	3	DDG2P;DisGenNet;HPO;Ilyas_M_(2020)_F1000Res;Opentarget_genetic_association;Phenolyser;SysID_primary_ID_genes	7
FANCE	ENSG00000112039	6	DDG2P;DisGenNet;HPO;Ilyas_M_(2020)_F1000Res;Phenolyser;SysID_candidate_ID_genes	6
FANCF	ENSG00000183161	11	DisGenNet;HPO;Ilyas_M_(2020)_F1000Res;Phenolyser;SysID_candidate_ID_genes	5
FANCG	ENSG00000221829	9	DisGenNet;Fulgent_:_gene_panel;HPO;Ilyas_M_(2020)_F1000Res;Phenolyser;SysID_candidate_ID_genes	6
FANCI	ENSG00000140525	15	DisGenNet;HPO;Ilyas_M_(2020)_F1000Res;Phenolyser;SysID_candidate_ID_genes	5
FANCL	ENSG00000115392	2	DisGenNet;HPO;Phenolyser;SysID_candidate_ID_genes	4
FANCM	ENSG00000187790	14	DisGenNet;HPO;Phenolyser	3
FAR1	ENSG00000197601	11	DDG2P;DisGenNet;HPO;Ilyas_M_(2020)_F1000Res;Opentarget_textMining;Phenolyser;Radboudumc_:_Exome_panels;SysID_primary_ID_genes	8
FARS2	ENSG00000145982	6	DisGenNet;HPO;Opentarget_genetic_association;Opentarget_textMining;Phenolyser	5
FARSB	ENSG00000116120	2	DisGenNet;Opentarget_genetic_association;Radboudumc_:_Exome_panels;SysID_candidate_ID_genes	4
FASN	ENSG00000169710	17	DisGenNet;IPA;Ilyas_M_(2020)_F1000Res;SysID_candidate_ID_genes	4
FASTKD2	ENSG00000118246	2	DisGenNet;HPO;Opentarget_textMining;Phenolyser	4
FAT4	ENSG00000196159	4	DisGenNet;HPO;Ilyas_M_(2020)_F1000Res;Phenolyser;Radboudumc_:_Exome_panels;SysID_primary_ID_genes	6
FBN1	ENSG00000166147	15	DDG2P;DisGenNet;Fulgent_:_gene_panel;HPO;Ilyas_M_(2020)_F1000Res;Vissers_LE_(2016)_Nat_Rev_Genet;Phenolyser	7
FBP1	ENSG00000165140	9	DisGenNet;HPO;Ilyas_M_(2020)_F1000Res	3
FBRSL1	ENSG00000112787	12	Opentarget_genetic_association;Radboudumc_:_Exome_panels;SysID_primary_ID_genes	3
FBXL3	ENSG00000005812	13	DisGenNet;HPO;IPA;OMIM-2022-12-09;Opentarget_genetic_association;Opentarget_textMining;Radboudumc_:_Exome_panels;SysID_primary_ID_genes	8
FBXL4	ENSG00000112234	6	DisGenNet;HPO;Opentarget_genetic_association;Opentarget_textMining;Phenolyser	5
FBXO11	ENSG00000138081	2	DisGenNet;Fulgent_:_gene_panel;HPO;IPA;Coe_B.P_(2019)_Nat_Genet;Ilyas_M_(2020)_F1000Res;OMIM-2022-12-09;Opentarget_genetic_association;Opentarget_textMining;Phenolyser;Radboudumc_:_Exome_panels;SysID_primary_ID_genes	12
FBXO28	ENSG00000143756	1	DDG2P;DisGenNet;HPO;Opentarget_textMining;SysID_primary_ID_genes	5
FBXO31	ENSG00000103264	16	DisGenNet;HPO;IPA;Vissers_LE_(2016)_Nat_Rev_Genet;OMIM-2022-12-09;Opentarget_textMining;Orphanet;Phenolyser;Radboudumc_:_Exome_panels;SysID_primary_ID_genes	10
FBXW11	ENSG00000072803	5	DDG2P;DisGenNet;HPO;Opentarget_genetic_association;Orphanet;Radboudumc_:_Exome_panels;SysID_primary_ID_genes	7
FDFT1	ENSG00000079459	8	DisGenNet;Radboudumc_:_Exome_panels;SysID_primary_ID_genes	3
FDXR	ENSG00000161513	17	HPO;Opentarget_textMining;Orphanet	3
FGD1	ENSG00000102302	X	DDG2P;DisGenNet;Fulgent_:_gene_panel;HPO;IPA;Ilyas_M_(2020)_F1000Res;Vissers_LE_(2016)_Nat_Rev_Genet;OMIM-2022-12-09;Opentarget_genetic_association;Opentarget_textMining;Phenolyser;Radboudumc_:_Exome_panels;SysID_primary_ID_genes	13
FGF12	ENSG00000114279	3	DisGenNet;HPO;Ilyas_M_(2020)_F1000Res;Opentarget_textMining;Radboudumc_:_Exome_panels;SysID_primary_ID_genes	6
FGF13	ENSG00000129682	X	DisGenNet;HPO;Opentarget_genetic_association;Opentarget_textMining;Radboudumc_:_Exome_panels;SysID_primary_ID_genes	6
FGF14	ENSG00000102466	13	DisGenNet;Fulgent_:_gene_panel;HPO;Ilyas_M_(2020)_F1000Res;Phenolyser;Radboudumc_:_Exome_panels;SysID_candidate_ID_genes	7
FGF8	ENSG00000107831	10	DisGenNet;HPO;Phenolyser	3
FGFR1	ENSG00000077782	8	DDG2P;DisGenNet;Fulgent_:_gene_panel;HPO;IPA;Vissers_LE_(2016)_Nat_Rev_Genet;Opentarget_textMining;Phenolyser;Radboudumc_:_Exome_panels;SysID_primary_ID_genes	10
FGFR2	ENSG00000066468	10	DDG2P;DisGenNet;Fulgent_:_gene_panel;HPO;IPA;Ilyas_M_(2020)_F1000Res;Vissers_LE_(2016)_Nat_Rev_Genet;OMIM-2022-12-09;Opentarget_genetic_association;Opentarget_textMining;Phenolyser;Radboudumc_:_Exome_panels;SysID_primary_ID_genes	13
FGFR3	ENSG00000068078	4	DDG2P;DisGenNet;Fulgent_:_gene_panel;HPO;Vissers_LE_(2016)_Nat_Rev_Genet;Opentarget_textMining;Phenolyser;Radboudumc_:_Exome_panels;SysID_primary_ID_genes	9
FGFRL1	ENSG00000127418	4	DisGenNet;HPO;Opentarget_textMining;Phenolyser	4
FH	ENSG00000091483	1	DDG2P;HPO;Ilyas_M_(2020)_F1000Res;Vissers_LE_(2016)_Nat_Rev_Genet;Phenolyser;Radboudumc_:_Exome_panels;SysID_primary_ID_genes	7
FHIP2A	ENSG00000151553	10	IPA;Opentarget_textMining;SysID_candidate_ID_genes	3
FIBP	ENSG00000172500	11	DisGenNet;HPO;Opentarget_textMining;Orphanet;Phenolyser;Radboudumc_:_Exome_panels;SysID_primary_ID_genes	7
FIG4	ENSG00000112367	6	HPO;Ilyas_M_(2020)_F1000Res;Opentarget_textMining;Phenolyser;Radboudumc_:_Exome_panels;SysID_primary_ID_genes	6
FIGN	ENSG00000182263	2	Coe_B.P_(2019)_Nat_Genet;Vissers_LE_(2016)_Nat_Rev_Genet;Radboudumc_:_Exome_panels	3
FKRP	ENSG00000181027	19	DDG2P;DisGenNet;Fulgent_:_gene_panel;HPO;IPA;Ilyas_M_(2020)_F1000Res;Vissers_LE_(2016)_Nat_Rev_Genet;OMIM-2022-12-09;Opentarget_textMining;Orphanet;Phenolyser;Radboudumc_:_Exome_panels;SysID_primary_ID_genes	13
FKTN	ENSG00000106692	9	DDG2P;DisGenNet;Fulgent_:_gene_panel;HPO;IPA;Ilyas_M_(2020)_F1000Res;Vissers_LE_(2016)_Nat_Rev_Genet;OMIM-2022-12-09;Opentarget_textMining;Orphanet;Phenolyser;Radboudumc_:_Exome_panels;SysID_primary_ID_genes	13
FLCN	ENSG00000154803	17	DisGenNet;HPO;Phenolyser	3
FLI1	ENSG00000151702	11	DisGenNet;HPO;Phenolyser	3
FLII	ENSG00000177731	17	DisGenNet;HPO;Opentarget_textMining;Phenolyser	4
FLNA	ENSG00000196924	X	DDG2P;DisGenNet;Fulgent_:_gene_panel;HPO;IPA;Ilyas_M_(2020)_F1000Res;Mireia_Coll-TanÃ©_(2019)_Dis_Model_Mech;Vissers_LE_(2016)_Nat_Rev_Genet;Opentarget_genetic_association;Opentarget_textMining;Phenolyser;Radboudumc_:_Exome_panels;SysID_primary_ID_genes	13
FLNB	ENSG00000136068	3	DDG2P;DisGenNet;HPO;Ilyas_M_(2020)_F1000Res;Phenolyser;SysID_candidate_ID_genes	6
FLVCR1	ENSG00000162769	1	DDG2P;DisGenNet;HPO;Ilyas_M_(2020)_F1000Res;Vissers_LE_(2016)_Nat_Rev_Genet;Phenolyser;Radboudumc_:_Exome_panels;SysID_candidate_ID_genes	8
FLVCR2	ENSG00000119686	14	Ilyas_M_(2020)_F1000Res;Radboudumc_:_Exome_panels;SysID_candidate_ID_genes	3
FMN2	ENSG00000155816	1	DDG2P;DisGenNet;HPO;IPA;Ilyas_M_(2020)_F1000Res;Vissers_LE_(2016)_Nat_Rev_Genet;OMIM-2022-12-09;Opentarget_genetic_association;Opentarget_textMining;Orphanet;Phenolyser;Radboudumc_:_Exome_panels;SysID_primary_ID_genes	13
FMR1	ENSG00000102081	X	DDG2P;DisGenNet;Fulgent_:_gene_panel;HPO;IPA;Ilyas_M_(2020)_F1000Res;Mireia_Coll-TanÃ©_(2019)_Dis_Model_Mech;Vissers_LE_(2016)_Nat_Rev_Genet;Opentarget_genetic_association;Opentarget_textMining;Phenolyser;Radboudumc_:_Exome_panels;SysID_primary_ID_genes	13
FOLR1	ENSG00000110195	11	DDG2P;DisGenNet;Fulgent_:_gene_panel;HPO;IPA;Ilyas_M_(2020)_F1000Res;Opentarget_genetic_association;Phenolyser;Radboudumc_:_Exome_panels;SysID_primary_ID_genes	10
FOS	ENSG00000170345	14	DisGenNet;HPO;Opentarget_textMining;Phenolyser	4
FOXC1	ENSG00000054598	6	DisGenNet;Ilyas_M_(2020)_F1000Res;Opentarget_textMining	3
FOXE1	ENSG00000178919	9	DisGenNet;HPO;Ilyas_M_(2020)_F1000Res;Phenolyser	4
FOXF1	ENSG00000103241	16	DisGenNet;Ilyas_M_(2020)_F1000Res;Opentarget_textMining	3
FOXG1	ENSG00000176165	14	DDG2P;DisGenNet;Fulgent_:_gene_panel;HPO;IPA;Coe_B.P_(2019)_Nat_Genet;Ilyas_M_(2020)_F1000Res;Vissers_LE_(2016)_Nat_Rev_Genet;Opentarget_genetic_association;Opentarget_textMining;Phenolyser;Radboudumc_:_Exome_panels;SysID_primary_ID_genes	13
FOXH1	ENSG00000160973	8	DisGenNet;HPO;Phenolyser	3
FOXI1	ENSG00000168269	5	DisGenNet;HPO;Phenolyser	3
FOXP1	ENSG00000114861	3	AutDB;DisGenNet;Fulgent_:_gene_panel;HPO;IPA;Coe_B.P_(2019)_Nat_Genet;Ilyas_M_(2020)_F1000Res;Vissers_LE_(2016)_Nat_Rev_Genet;OMIM-2022-12-09;Opentarget_genetic_association;Opentarget_textMining;Orphanet;Phenolyser;Radboudumc_:_Exome_panels;SysID_primary_ID_genes	15
FOXP2	ENSG00000128573	7	DisGenNet;Fulgent_:_gene_panel;Coe_B.P_(2019)_Nat_Genet;Ilyas_M_(2020)_F1000Res;Vissers_LE_(2016)_Nat_Rev_Genet;Opentarget_genetic_association;Opentarget_textMining;Phenolyser;Radboudumc_:_Exome_panels;SysID_primary_ID_genes	10
FOXP4	ENSG00000137166	6	DisGenNet;Opentarget_genetic_association;Opentarget_textMining	3
FOXRED1	ENSG00000110074	11	DisGenNet;HPO;Ilyas_M_(2020)_F1000Res;Phenolyser;Radboudumc_:_Exome_panels;SysID_primary_ID_genes	6
FRA16E	0	0	DisGenNet;HPO;Phenolyser	3
FRAS1	ENSG00000138759	4	DDG2P;DisGenNet;HPO;Ilyas_M_(2020)_F1000Res;Vissers_LE_(2016)_Nat_Rev_Genet;Phenolyser;Radboudumc_:_Exome_panels;SysID_primary_ID_genes	8
FREM2	ENSG00000150893	13	DDG2P;DisGenNet;HPO;Ilyas_M_(2020)_F1000Res;Phenolyser;SysID_candidate_ID_genes	6
FRG1	ENSG00000109536	4	DisGenNet;HPO;Phenolyser	3
FRMD4A	ENSG00000151474	10	DisGenNet;HPO;Orphanet;Phenolyser;Radboudumc_:_Exome_panels;SysID_primary_ID_genes	6
FRMPD4	ENSG00000169933	X	DDG2P;DisGenNet;Fulgent_:_gene_panel;HPO;IPA;Ilyas_M_(2020)_F1000Res;OMIM-2022-12-09;Opentarget_genetic_association;Opentarget_textMining;Orphanet;Phenolyser;Radboudumc_:_Exome_panels;SysID_primary_ID_genes	13
FRRS1L	ENSG00000260230	9	DisGenNet;HPO;Opentarget_textMining;Orphanet;Phenolyser;Radboudumc_:_Exome_panels;SysID_primary_ID_genes	7
FRY	ENSG00000073910	13	DisGenNet;IPA;Ilyas_M_(2020)_F1000Res;SysID_primary_ID_genes	4
FSCN2	ENSG00000186765	17	DisGenNet;HPO;Phenolyser	3
FTCD	ENSG00000160282	21	DDG2P;DisGenNet;HPO;IPA;Ilyas_M_(2020)_F1000Res;Opentarget_genetic_association;Phenolyser;Radboudumc_:_Exome_panels;SysID_candidate_ID_genes	9
FTL	ENSG00000087086	19	DisGenNet;Ilyas_M_(2020)_F1000Res;Phenolyser	3
FTO	ENSG00000140718	16	DisGenNet;Fulgent_:_gene_panel;Ilyas_M_(2020)_F1000Res;Vissers_LE_(2016)_Nat_Rev_Genet;Opentarget_textMining;Radboudumc_:_Exome_panels;SysID_primary_ID_genes	7
FTSJ1	ENSG00000068438	X	DDG2P;DisGenNet;Fulgent_:_gene_panel;HPO;IPA;Ilyas_M_(2020)_F1000Res;Vissers_LE_(2016)_Nat_Rev_Genet;OMIM-2022-12-09;Opentarget_genetic_association;Opentarget_textMining;Orphanet;Phenolyser;Radboudumc_:_Exome_panels;SysID_primary_ID_genes	14
FUCA1	ENSG00000179163	1	DDG2P;DisGenNet;HPO;Ilyas_M_(2020)_F1000Res;Vissers_LE_(2016)_Nat_Rev_Genet;Opentarget_genetic_association;Phenolyser;Radboudumc_:_Exome_panels;SysID_primary_ID_genes	9
FUT8	ENSG00000033170	14	DisGenNet;HPO;Ilyas_M_(2020)_F1000Res;Opentarget_genetic_association;Phenolyser;Radboudumc_:_Exome_panels;SysID_primary_ID_genes	7
FXR1	ENSG00000114416	3	DisGenNet;IPA;Opentarget_genetic_association;Opentarget_textMining;SysID_candidate_ID_genes	5
FXR2	ENSG00000129245	17	DisGenNet;OMIM-2022-12-09;Opentarget_textMining	3
FZD2	ENSG00000180340	17	DisGenNet;HPO;Phenolyser;SysID_candidate_ID_genes	4
FZR1	ENSG00000105325	19	DDG2P;Opentarget_textMining;SysID_primary_ID_genes	3
G6PC3	ENSG00000141349	17	DisGenNet;Fulgent_:_gene_panel;Opentarget_textMining	3
GABBR2	ENSG00000136928	9	DisGenNet;HPO;IPA;Ilyas_M_(2020)_F1000Res;Opentarget_genetic_association;Phenolyser;Radboudumc_:_Exome_panels;SysID_primary_ID_genes	8
GABRA1	ENSG00000022355	5	DisGenNet;HPO;IPA;Ilyas_M_(2020)_F1000Res;Vissers_LE_(2016)_Nat_Rev_Genet;Opentarget_genetic_association;Opentarget_textMining;Phenolyser;Radboudumc_:_Exome_panels;SysID_primary_ID_genes	10
GABRA2	ENSG00000151834	4	DisGenNet;HPO;IPA;Opentarget_genetic_association;Opentarget_textMining;Radboudumc_:_Exome_panels;SysID_primary_ID_genes	7
GABRA3	ENSG00000011677	X	IPA;OMIM-2022-12-09;Opentarget_textMining;Radboudumc_:_Exome_panels;SysID_candidate_ID_genes	5
GABRA4	ENSG00000109158	4	IPA;Opentarget_textMining;Phenolyser	3
GABRA5	ENSG00000186297	15	DisGenNet;HPO;IPA;Opentarget_textMining;Radboudumc_:_Exome_panels;SysID_primary_ID_genes	6
GABRB1	ENSG00000163288	4	IPA;Radboudumc_:_Exome_panels;SysID_candidate_ID_genes	3
GABRB2	ENSG00000145864	5	DDG2P;DisGenNet;HPO;IPA;Coe_B.P_(2019)_Nat_Genet;Ilyas_M_(2020)_F1000Res;Opentarget_genetic_association;Opentarget_textMining;Phenolyser;Radboudumc_:_Exome_panels;SysID_primary_ID_genes	11
GABRB3	ENSG00000166206	15	DDG2P;DisGenNet;Fulgent_:_gene_panel;HPO;IPA;Coe_B.P_(2019)_Nat_Genet;Ilyas_M_(2020)_F1000Res;Opentarget_genetic_association;Opentarget_textMining;Phenolyser;Radboudumc_:_Exome_panels;SysID_primary_ID_genes	12
GABRD	ENSG00000187730	1	DisGenNet;HPO;IPA;Opentarget_genetic_association;Opentarget_textMining;Phenolyser;Radboudumc_:_Exome_panels;SysID_primary_ID_genes	8
GABRG2	ENSG00000113327	5	DisGenNet;Fulgent_:_gene_panel;HPO;IPA;Ilyas_M_(2020)_F1000Res;Opentarget_genetic_association;Radboudumc_:_Exome_panels;SysID_primary_ID_genes	8
GAD1	ENSG00000128683	2	DDG2P;DisGenNet;HPO;Ilyas_M_(2020)_F1000Res;Vissers_LE_(2016)_Nat_Rev_Genet;Opentarget_textMining;Phenolyser;Radboudumc_:_Exome_panels;SysID_primary_ID_genes	9
GALC	ENSG00000054983	14	IPA;Ilyas_M_(2020)_F1000Res;Opentarget_genetic_association;Radboudumc_:_Exome_panels;SysID_primary_ID_genes	5
GALE	ENSG00000117308	1	DDG2P;DisGenNet;Fulgent_:_gene_panel;HPO;Ilyas_M_(2020)_F1000Res;Vissers_LE_(2016)_Nat_Rev_Genet;Opentarget_genetic_association;Phenolyser;Radboudumc_:_Exome_panels;SysID_primary_ID_genes	10
GALNT2	ENSG00000143641	1	HPO;Radboudumc_:_Exome_panels;SysID_primary_ID_genes	3
GALT	ENSG00000213930	9	DDG2P;DisGenNet;HPO;Ilyas_M_(2020)_F1000Res;Vissers_LE_(2016)_Nat_Rev_Genet;Opentarget_genetic_association;Phenolyser;Radboudumc_:_Exome_panels;SysID_primary_ID_genes	9
GAMT	ENSG00000130005	19	DDG2P;DisGenNet;Fulgent_:_gene_panel;HPO;IPA;Ilyas_M_(2020)_F1000Res;Vissers_LE_(2016)_Nat_Rev_Genet;Opentarget_genetic_association;Opentarget_textMining;Phenolyser;Radboudumc_:_Exome_panels;SysID_primary_ID_genes	12
GAN	ENSG00000261609	16	DDG2P;DisGenNet;Fulgent_:_gene_panel;HPO;IPA;Opentarget_genetic_association;Phenolyser;SysID_primary_ID_genes	8
GARNL3	ENSG00000136895	9	DisGenNet;IPA;Opentarget_genetic_association;Opentarget_textMining;SysID_candidate_ID_genes	5
GAS1	ENSG00000180447	9	DisGenNet;HPO;Phenolyser	3
GATA1	ENSG00000102145	X	DisGenNet;HPO;Phenolyser	3
GATA4	ENSG00000136574	8	DisGenNet;HPO;Ilyas_M_(2020)_F1000Res;Opentarget_genetic_association;Opentarget_textMining;Phenolyser	6
GATA6	ENSG00000141448	18	DisGenNet;HPO;Ilyas_M_(2020)_F1000Res;Opentarget_textMining;Phenolyser;SysID_primary_ID_genes	6
GATAD2B	ENSG00000143614	1	DisGenNet;Fulgent_:_gene_panel;HPO;IPA;Coe_B.P_(2019)_Nat_Genet;Ilyas_M_(2020)_F1000Res;Vissers_LE_(2016)_Nat_Rev_Genet;Opentarget_genetic_association;Opentarget_textMining;Orphanet;Phenolyser;Radboudumc_:_Exome_panels;SysID_primary_ID_genes	13
GATM	ENSG00000171766	15	DisGenNet;HPO;IPA;Ilyas_M_(2020)_F1000Res;Vissers_LE_(2016)_Nat_Rev_Genet;Opentarget_genetic_association;Opentarget_textMining;Phenolyser;Radboudumc_:_Exome_panels;SysID_primary_ID_genes	10
GBA	ENSG00000177628	1	Fulgent_:_gene_panel;Ilyas_M_(2020)_F1000Res;SysID_candidate_ID_genes	3
GBA2	ENSG00000070610	9	DisGenNet;HPO;Ilyas_M_(2020)_F1000Res;Opentarget_genetic_association;Phenolyser;SysID_primary_ID_genes	6
GBE1	ENSG00000114480	3	DisGenNet;Fulgent_:_gene_panel;HPO;Phenolyser;SysID_candidate_ID_genes	5
GCDH	ENSG00000105607	19	Ilyas_M_(2020)_F1000Res;Opentarget_genetic_association;SysID_candidate_ID_genes	3
GCH1	ENSG00000131979	14	DDG2P;DisGenNet;HPO;IPA;Ilyas_M_(2020)_F1000Res;Vissers_LE_(2016)_Nat_Rev_Genet;Opentarget_genetic_association;Phenolyser;Radboudumc_:_Exome_panels;SysID_primary_ID_genes	10
GCK	ENSG00000106633	7	DisGenNet;Fulgent_:_gene_panel;HPO;Phenolyser	4
GCLC	ENSG00000001084	6	DisGenNet;HPO;Phenolyser	3
GCSH	ENSG00000140905	16	DDG2P;DisGenNet;HPO;Ilyas_M_(2020)_F1000Res;Vissers_LE_(2016)_Nat_Rev_Genet;Phenolyser;Radboudumc_:_Exome_panels;SysID_primary_ID_genes	8
GDF6	ENSG00000156466	8	DisGenNet;HPO;Ilyas_M_(2020)_F1000Res;Phenolyser	4
GDI1	ENSG00000203879	X	DDG2P;DisGenNet;Fulgent_:_gene_panel;HPO;IPA;Ilyas_M_(2020)_F1000Res;Vissers_LE_(2016)_Nat_Rev_Genet;OMIM-2022-12-09;Opentarget_genetic_association;Opentarget_textMining;Orphanet;Phenolyser;Radboudumc_:_Exome_panels;SysID_primary_ID_genes	14
GDNF	ENSG00000168621	5	DisGenNet;HPO;Opentarget_textMining;Phenolyser	4
GEMIN4	ENSG00000179409	17	DisGenNet;HPO;Opentarget_genetic_association;Phenolyser	4
GEMIN5	ENSG00000082516	5	Orphanet;Radboudumc_:_Exome_panels;SysID_primary_ID_genes	3
GFAP	ENSG00000131095	17	DisGenNet;Fulgent_:_gene_panel;Ilyas_M_(2020)_F1000Res;Vissers_LE_(2016)_Nat_Rev_Genet;Opentarget_genetic_association;Opentarget_textMining;Radboudumc_:_Exome_panels;SysID_primary_ID_genes	8
GFER	ENSG00000127554	16	DisGenNet;Ilyas_M_(2020)_F1000Res;Opentarget_genetic_association;Radboudumc_:_Exome_panels;SysID_candidate_ID_genes	5
GFM1	ENSG00000168827	3	Fulgent_:_gene_panel;Ilyas_M_(2020)_F1000Res;Radboudumc_:_Exome_panels;SysID_candidate_ID_genes	4
GFM2	ENSG00000164347	5	DisGenNet;HPO;Opentarget_textMining	3
GGT1	ENSG00000100031	22	DisGenNet;HPO;Phenolyser	3
GHR	ENSG00000112964	5	DisGenNet;Fulgent_:_gene_panel;HPO;Ilyas_M_(2020)_F1000Res;Opentarget_textMining;Phenolyser	6
GJA1	ENSG00000152661	6	DDG2P;DisGenNet;HPO;Ilyas_M_(2020)_F1000Res;Opentarget_genetic_association;Phenolyser;Radboudumc_:_Exome_panels;SysID_candidate_ID_genes	8
GJA5	ENSG00000265107	1	DisGenNet;HPO;IPA;Phenolyser	4
GJA8	ENSG00000121634	1	DisGenNet;HPO;IPA;Ilyas_M_(2020)_F1000Res;Phenolyser	5
GJB1	ENSG00000169562	X	Ilyas_M_(2020)_F1000Res;Vissers_LE_(2016)_Nat_Rev_Genet;Phenolyser;Radboudumc_:_Exome_panels	4
GJB2	ENSG00000165474	13	DisGenNet;Ilyas_M_(2020)_F1000Res;Opentarget_textMining;Phenolyser	4
GJB3	ENSG00000188910	1	DisGenNet;HPO;Ilyas_M_(2020)_F1000Res;Phenolyser	4
GJB4	ENSG00000189433	1	DisGenNet;HPO;Phenolyser	3
GJB6	ENSG00000121742	13	DisGenNet;Opentarget_textMining;Phenolyser	3
GJC2	ENSG00000198835	1	DisGenNet;IPA;Ilyas_M_(2020)_F1000Res;Vissers_LE_(2016)_Nat_Rev_Genet;Opentarget_genetic_association;Radboudumc_:_Exome_panels;SysID_primary_ID_genes	7
GK	ENSG00000198814	X	DDG2P;DisGenNet;Fulgent_:_gene_panel;HPO;Ilyas_M_(2020)_F1000Res;Vissers_LE_(2016)_Nat_Rev_Genet;Phenolyser;Radboudumc_:_Exome_panels;SysID_primary_ID_genes	9
GLB1	ENSG00000170266	3	DDG2P;DisGenNet;HPO;Ilyas_M_(2020)_F1000Res;Vissers_LE_(2016)_Nat_Rev_Genet;Opentarget_genetic_association;Opentarget_textMining;Phenolyser;Radboudumc_:_Exome_panels;SysID_primary_ID_genes	10
GLDC	ENSG00000178445	9	DDG2P;DisGenNet;HPO;Ilyas_M_(2020)_F1000Res;Vissers_LE_(2016)_Nat_Rev_Genet;Opentarget_textMining;Phenolyser;Radboudumc_:_Exome_panels;SysID_primary_ID_genes	9
GLI1	ENSG00000111087	12	DisGenNet;HPO;Opentarget_textMining;Phenolyser	4
GLI2	ENSG00000074047	2	DisGenNet;HPO;IPA;Ilyas_M_(2020)_F1000Res;Vissers_LE_(2016)_Nat_Rev_Genet;Opentarget_genetic_association;Phenolyser;Radboudumc_:_Exome_panels;SysID_primary_ID_genes	9
GLI3	ENSG00000106571	7	DDG2P;DisGenNet;Fulgent_:_gene_panel;HPO;IPA;Ilyas_M_(2020)_F1000Res;Vissers_LE_(2016)_Nat_Rev_Genet;Opentarget_textMining;Phenolyser;Radboudumc_:_Exome_panels;SysID_primary_ID_genes	11
GLIS3	ENSG00000107249	9	DisGenNet;HPO;Opentarget_textMining;Phenolyser	4
GLRA1	ENSG00000145888	5	DisGenNet;Fulgent_:_gene_panel;HPO;Phenolyser;SysID_candidate_ID_genes	5
GLRA2	ENSG00000101958	X	HPO;OMIM-2022-12-09;SysID_candidate_ID_genes	3
GLRB	ENSG00000109738	4	DisGenNet;HPO;Opentarget_textMining;Phenolyser	4
GLS	ENSG00000115419	2	IPA;OMIM-2022-12-09;Radboudumc_:_Exome_panels;SysID_primary_ID_genes	4
GLUD1	ENSG00000148672	10	DDG2P;DisGenNet;HPO;Opentarget_genetic_association;Phenolyser;Radboudumc_:_Exome_panels	6
GLUL	ENSG00000135821	1	DDG2P;DisGenNet;HPO;Opentarget_textMining;Phenolyser	5
GLYCTK	ENSG00000168237	3	DisGenNet;Fulgent_:_gene_panel;HPO;Ilyas_M_(2020)_F1000Res;Phenolyser;Radboudumc_:_Exome_panels;SysID_candidate_ID_genes	7
GM2A	ENSG00000196743	5	Fulgent_:_gene_panel;Ilyas_M_(2020)_F1000Res;Vissers_LE_(2016)_Nat_Rev_Genet;Radboudumc_:_Exome_panels;SysID_candidate_ID_genes	5
GMNN	ENSG00000112312	6	DisGenNet;HPO;Phenolyser;Radboudumc_:_Exome_panels;SysID_primary_ID_genes	5
GMPPA	ENSG00000144591	2	DDG2P;DisGenNet;HPO;IPA;Ilyas_M_(2020)_F1000Res;Vissers_LE_(2016)_Nat_Rev_Genet;OMIM-2022-12-09;Opentarget_textMining;Phenolyser;Radboudumc_:_Exome_panels;SysID_primary_ID_genes	11
GMPPB	ENSG00000173540	3	DisGenNet;HPO;IPA;Ilyas_M_(2020)_F1000Res;Vissers_LE_(2016)_Nat_Rev_Genet;OMIM-2022-12-09;Opentarget_textMining;Orphanet;Phenolyser;Radboudumc_:_Exome_panels;SysID_primary_ID_genes	11
GNAI1	ENSG00000127955	7	HPO;Coe_B.P_(2019)_Nat_Genet;Ilyas_M_(2020)_F1000Res;Radboudumc_:_Exome_panels;SysID_primary_ID_genes	5
GNAI2	ENSG00000114353	3	DisGenNet;Opentarget_textMining;SysID_candidate_ID_genes	3
GNAO1	ENSG00000087258	16	DisGenNet;Fulgent_:_gene_panel;HPO;Coe_B.P_(2019)_Nat_Genet;Ilyas_M_(2020)_F1000Res;Vissers_LE_(2016)_Nat_Rev_Genet;Opentarget_genetic_association;Opentarget_textMining;Phenolyser;Radboudumc_:_Exome_panels;SysID_primary_ID_genes	11
GNAQ	ENSG00000156052	9	DisGenNet;HPO;Phenolyser;SysID_candidate_ID_genes	4
GNAS	ENSG00000087460	20	DDG2P;DisGenNet;Fulgent_:_gene_panel;HPO;IPA;Ilyas_M_(2020)_F1000Res;Vissers_LE_(2016)_Nat_Rev_Genet;Opentarget_genetic_association;Opentarget_textMining;Phenolyser;Radboudumc_:_Exome_panels;SysID_primary_ID_genes	12
GNB1	ENSG00000078369	1	DDG2P;DisGenNet;HPO;IPA;Ilyas_M_(2020)_F1000Res;OMIM-2022-12-09;Opentarget_genetic_association;Opentarget_textMining;Orphanet;Phenolyser;Radboudumc_:_Exome_panels;SysID_primary_ID_genes	12
GNB2	ENSG00000172354	7	HPO;Opentarget_textMining;Orphanet;SysID_primary_ID_genes	4
GNB5	ENSG00000069966	15	DisGenNet;HPO;IPA;OMIM-2022-12-09;Opentarget_textMining;Orphanet;Phenolyser;Radboudumc_:_Exome_panels;SysID_primary_ID_genes	9
GNE	ENSG00000159921	9	DisGenNet;HPO;Phenolyser;SysID_candidate_ID_genes	4
GNPAT	ENSG00000116906	1	DDG2P;DisGenNet;Fulgent_:_gene_panel;HPO;Ilyas_M_(2020)_F1000Res;Vissers_LE_(2016)_Nat_Rev_Genet;Opentarget_textMining;Phenolyser;Radboudumc_:_Exome_panels;SysID_primary_ID_genes	10
GNPTAB	ENSG00000111670	12	DDG2P;DisGenNet;Fulgent_:_gene_panel;HPO;Ilyas_M_(2020)_F1000Res;Phenolyser;Radboudumc_:_Exome_panels;SysID_primary_ID_genes	8
GNPTG	ENSG00000090581	16	DDG2P;DisGenNet;Fulgent_:_gene_panel;HPO;Ilyas_M_(2020)_F1000Res;Phenolyser;Radboudumc_:_Exome_panels;SysID_primary_ID_genes	8
GNS	ENSG00000135677	12	DDG2P;DisGenNet;HPO;Ilyas_M_(2020)_F1000Res;Vissers_LE_(2016)_Nat_Rev_Genet;Opentarget_genetic_association;Phenolyser;Radboudumc_:_Exome_panels;SysID_primary_ID_genes	9
GON4L	ENSG00000116580	1	DisGenNet;IPA;Ilyas_M_(2020)_F1000Res;Opentarget_textMining;SysID_candidate_ID_genes	5
GORAB	ENSG00000120370	1	DisGenNet;HPO;Phenolyser	3
GOT2	ENSG00000125166	16	DisGenNet;HPO;Radboudumc_:_Exome_panels;SysID_primary_ID_genes	4
GP1BB	ENSG00000203618	22	DisGenNet;HPO;IPA;Phenolyser	4
GPAA1	ENSG00000197858	8	DisGenNet;HPO;Ilyas_M_(2020)_F1000Res;Phenolyser;Radboudumc_:_Exome_panels;SysID_primary_ID_genes	6
GPC3	ENSG00000147257	X	DisGenNet;Fulgent_:_gene_panel;HPO;IPA;Ilyas_M_(2020)_F1000Res;Vissers_LE_(2016)_Nat_Rev_Genet;Opentarget_genetic_association;Opentarget_textMining;Phenolyser;Radboudumc_:_Exome_panels;SysID_primary_ID_genes	11
GPC4	ENSG00000076716	X	DisGenNet;HPO;Opentarget_textMining;Phenolyser;Radboudumc_:_Exome_panels;SysID_primary_ID_genes	6
GPC6	ENSG00000183098	13	DisGenNet;HPO;Phenolyser	3
GPHN	ENSG00000171723	14	DisGenNet;HPO;Vissers_LE_(2016)_Nat_Rev_Genet;Opentarget_genetic_association;Phenolyser;Radboudumc_:_Exome_panels;SysID_primary_ID_genes	7
GPI	ENSG00000105220	19	DisGenNet;HPO;Opentarget_textMining;Phenolyser;SysID_candidate_ID_genes	5
GPR161	ENSG00000143147	1	DisGenNet;HPO;Phenolyser	3
GPR52	ENSG00000203737	1	DisGenNet;Opentarget_textMining;SysID_candidate_ID_genes	3
GPR56	ENSG00000205336	10	0	0
GPR88	ENSG00000181656	1	DisGenNet;HPO;Opentarget_textMining;Phenolyser	4
GPSM2	ENSG00000121957	1	HPO;Ilyas_M_(2020)_F1000Res;Phenolyser;Radboudumc_:_Exome_panels;SysID_candidate_ID_genes	5
GPT2	ENSG00000166123	16	DisGenNet;HPO;IPA;Ilyas_M_(2020)_F1000Res;Vissers_LE_(2016)_Nat_Rev_Genet;Opentarget_genetic_association;Opentarget_textMining;Orphanet;Phenolyser;Radboudumc_:_Exome_panels;SysID_primary_ID_genes	11
GRAMD1B	ENSG00000023171	11	IPA;Opentarget_genetic_association;Opentarget_textMining;SysID_candidate_ID_genes	4
GRIA1	ENSG00000155511	5	DisGenNet;HPO;IPA;Ilyas_M_(2020)_F1000Res;OMIM-2022-12-09;Opentarget_genetic_association;Orphanet;SysID_primary_ID_genes	8
GRIA2	ENSG00000120251	4	DisGenNet;HPO;IPA;Ilyas_M_(2020)_F1000Res;Opentarget_genetic_association;Opentarget_textMining;Radboudumc_:_Exome_panels;SysID_primary_ID_genes	8
GRIA3	ENSG00000125675	X	DDG2P;DisGenNet;Fulgent_:_gene_panel;HPO;IPA;Ilyas_M_(2020)_F1000Res;Vissers_LE_(2016)_Nat_Rev_Genet;OMIM-2022-12-09;Opentarget_genetic_association;Opentarget_textMining;Orphanet;Phenolyser;Radboudumc_:_Exome_panels;SysID_primary_ID_genes	14
GRIA4	ENSG00000152578	11	DisGenNet;HPO;IPA;Ilyas_M_(2020)_F1000Res;Opentarget_genetic_association;Opentarget_textMining;Orphanet;Phenolyser;Radboudumc_:_Exome_panels;SysID_primary_ID_genes	10
GRID2	ENSG00000152208	4	HPO;Ilyas_M_(2020)_F1000Res;Vissers_LE_(2016)_Nat_Rev_Genet;Opentarget_textMining;Radboudumc_:_Exome_panels;SysID_primary_ID_genes	6
GRIK2	ENSG00000164418	6	DDG2P;DisGenNet;Fulgent_:_gene_panel;HPO;IPA;Ilyas_M_(2020)_F1000Res;Mireia_Coll-TanÃ©_(2019)_Dis_Model_Mech;Vissers_LE_(2016)_Nat_Rev_Genet;OMIM-2022-12-09;Opentarget_genetic_association;Opentarget_textMining;Orphanet;Phenolyser;Radboudumc_:_Exome_panels;SysID_primary_ID_genes	15
GRIK4	ENSG00000149403	11	DisGenNet;Opentarget_textMining;SysID_candidate_ID_genes	3
GRIN1	ENSG00000176884	9	DisGenNet;Fulgent_:_gene_panel;HPO;IPA;Ilyas_M_(2020)_F1000Res;Vissers_LE_(2016)_Nat_Rev_Genet;Opentarget_genetic_association;Opentarget_textMining;Orphanet;Phenolyser;Radboudumc_:_Exome_panels;SysID_primary_ID_genes	12
GRIN2A	ENSG00000183454	16	DDG2P;DisGenNet;Fulgent_:_gene_panel;HPO;IPA;Ilyas_M_(2020)_F1000Res;Mireia_Coll-TanÃ©_(2019)_Dis_Model_Mech;Vissers_LE_(2016)_Nat_Rev_Genet;OMIM-2022-12-09;Opentarget_genetic_association;Opentarget_textMining;Orphanet;Phenolyser;Radboudumc_:_Exome_panels;SysID_primary_ID_genes	15
GRIN2B	ENSG00000273079	12	DisGenNet;Fulgent_:_gene_panel;HPO;IPA;Coe_B.P_(2019)_Nat_Genet;Ilyas_M_(2020)_F1000Res;Mireia_Coll-TanÃ©_(2019)_Dis_Model_Mech;Vissers_LE_(2016)_Nat_Rev_Genet;OMIM-2022-12-09;Opentarget_genetic_association;Opentarget_textMining;Orphanet;Phenolyser;Radboudumc_:_Exome_panels;SysID_primary_ID_genes	15
GRIN2D	ENSG00000105464	19	DisGenNet;HPO;IPA;Ilyas_M_(2020)_F1000Res;Opentarget_genetic_association;Opentarget_textMining;Radboudumc_:_Exome_panels;SysID_primary_ID_genes	8
GRIP1	ENSG00000155974	12	DisGenNet;HPO;IPA;Opentarget_genetic_association;Phenolyser;Radboudumc_:_Exome_panels	6
GRM1	ENSG00000152822	6	DDG2P;DisGenNet;Fulgent_:_gene_panel;HPO;Ilyas_M_(2020)_F1000Res;Vissers_LE_(2016)_Nat_Rev_Genet;Opentarget_textMining;Phenolyser;Radboudumc_:_Exome_panels;SysID_primary_ID_genes	10
GRM5	ENSG00000168959	11	DisGenNet;IPA;Opentarget_textMining	3
GRM7	ENSG00000196277	3	DisGenNet;HPO;IPA;Opentarget_genetic_association;Opentarget_textMining;Orphanet;Phenolyser;Radboudumc_:_Exome_panels;SysID_primary_ID_genes	9
GRN	ENSG00000030582	17	Fulgent_:_gene_panel;Phenolyser;Radboudumc_:_Exome_panels;SysID_candidate_ID_genes	4
GSPT2	ENSG00000189369	X	DDG2P;DisGenNet;Fulgent_:_gene_panel;Opentarget_textMining;SysID_candidate_ID_genes	5
GSS	ENSG00000100983	20	DisGenNet;Fulgent_:_gene_panel;HPO;Ilyas_M_(2020)_F1000Res;Vissers_LE_(2016)_Nat_Rev_Genet;Phenolyser;Radboudumc_:_Exome_panels;SysID_primary_ID_genes	8
GSX2	ENSG00000180613	4	Opentarget_genetic_association;Opentarget_textMining;SysID_primary_ID_genes	3
GTF2E2	ENSG00000197265	8	DisGenNet;HPO;IPA;Phenolyser;Radboudumc_:_Exome_panels;SysID_primary_ID_genes	6
GTF2H5	ENSG00000272047	6	DDG2P;DisGenNet;HPO;IPA;Ilyas_M_(2020)_F1000Res;Vissers_LE_(2016)_Nat_Rev_Genet;Phenolyser;Radboudumc_:_Exome_panels;SysID_primary_ID_genes	9
GTF2I	ENSG00000263001	7	DisGenNet;HPO;Opentarget_textMining;Phenolyser	4
GTF2IRD1	ENSG00000006704	7	DisGenNet;HPO;Phenolyser	3
GTF3C3	ENSG00000119041	2	DisGenNet;Opentarget_genetic_association;SysID_candidate_ID_genes	3
GTPBP2	ENSG00000172432	6	DisGenNet;HPO;IPA;Ilyas_M_(2020)_F1000Res;Opentarget_genetic_association;Opentarget_textMining;Phenolyser;Radboudumc_:_Exome_panels;SysID_primary_ID_genes	9
GTPBP3	ENSG00000130299	19	HPO;IPA;Ilyas_M_(2020)_F1000Res;Opentarget_genetic_association;Radboudumc_:_Exome_panels;SysID_primary_ID_genes	6
GUCA1B	ENSG00000112599	6	DisGenNet;HPO;Phenolyser	3
GUCY2D	ENSG00000132518	17	DisGenNet;HPO;Phenolyser;SysID_candidate_ID_genes	4
GUF1	ENSG00000151806	4	HPO;Phenolyser;SysID_candidate_ID_genes	3
GUSB	ENSG00000169919	7	DDG2P;DisGenNet;Fulgent_:_gene_panel;HPO;Ilyas_M_(2020)_F1000Res;Vissers_LE_(2016)_Nat_Rev_Genet;Opentarget_genetic_association;Phenolyser;Radboudumc_:_Exome_panels;SysID_primary_ID_genes	10
GYS2	ENSG00000111713	12	DisGenNet;HPO;Phenolyser	3
H1-4	ENSG00000168298	6	DDG2P;DisGenNet;HPO;IPA;Opentarget_textMining;Radboudumc_:_Exome_panels;SysID_primary_ID_genes	7
H19	ENSG00000130600	11	DisGenNet;HPO;Phenolyser	3
H3-3A	ENSG00000163041	1	DDG2P;DisGenNet;Opentarget_genetic_association;SysID_primary_ID_genes	4
H3-3B	ENSG00000132475	17	DisGenNet;Opentarget_genetic_association;SysID_primary_ID_genes	3
H3-4	ENSG00000168148	1	DisGenNet;IPA;SysID_candidate_ID_genes	3
H4C11	ENSG00000197238	6	DDG2P;DisGenNet;HPO;Opentarget_textMining;SysID_candidate_ID_genes	5
H4C2	ENSG00000278705	6	DisGenNet;IPA;Opentarget_textMining;SysID_candidate_ID_genes	4
H4C3	ENSG00000197061	6	DDG2P;DisGenNet;HPO;Orphanet;Radboudumc_:_Exome_panels;SysID_primary_ID_genes	6
H4C5	ENSG00000276966	6	DisGenNet;HPO;Orphanet	3
H4C9	ENSG00000276180	6	DisGenNet;HPO;Orphanet	3
HAAO	ENSG00000162882	2	HPO;Phenolyser;SysID_candidate_ID_genes	3
HACE1	ENSG00000085382	6	DDG2P;DisGenNet;HPO;Ilyas_M_(2020)_F1000Res;Phenolyser;Radboudumc_:_Exome_panels;SysID_primary_ID_genes	7
HADH	ENSG00000138796	4	DisGenNet;HPO;Ilyas_M_(2020)_F1000Res;Phenolyser;Radboudumc_:_Exome_panels	5
HADHA	ENSG00000084754	2	DisGenNet;HPO;Ilyas_M_(2020)_F1000Res;Phenolyser;Radboudumc_:_Exome_panels	5
HADHB	ENSG00000138029	2	DisGenNet;HPO;Phenolyser	3
HARS1	ENSG00000170445	5	Opentarget_genetic_association;Opentarget_textMining;SysID_primary_ID_genes	3
HAX1	ENSG00000143575	1	Fulgent_:_gene_panel;HPO;Ilyas_M_(2020)_F1000Res;Vissers_LE_(2016)_Nat_Rev_Genet;Radboudumc_:_Exome_panels;SysID_primary_ID_genes	6
HBA1	ENSG00000206172	16	DisGenNet;HPO;Orphanet;Phenolyser	4
HBA2	ENSG00000188536	16	DisGenNet;HPO;Orphanet;Phenolyser	4
HCCS	ENSG00000004961	X	DDG2P;DisGenNet;Fulgent_:_gene_panel;HPO;Ilyas_M_(2020)_F1000Res;Vissers_LE_(2016)_Nat_Rev_Genet;Opentarget_genetic_association;Phenolyser;Radboudumc_:_Exome_panels;SysID_primary_ID_genes	10
HCFC1	ENSG00000172534	X	DDG2P;DisGenNet;Fulgent_:_gene_panel;HPO;IPA;Ilyas_M_(2020)_F1000Res;Vissers_LE_(2016)_Nat_Rev_Genet;Opentarget_genetic_association;Opentarget_textMining;Orphanet;Phenolyser;Radboudumc_:_Exome_panels;SysID_primary_ID_genes	13
HCN1	ENSG00000164588	5	DisGenNet;HPO;IPA;Ilyas_M_(2020)_F1000Res;Vissers_LE_(2016)_Nat_Rev_Genet;Opentarget_genetic_association;Opentarget_textMining;Phenolyser;Radboudumc_:_Exome_panels;SysID_primary_ID_genes	10
HCN4	ENSG00000138622	15	DisGenNet;HPO;SysID_candidate_ID_genes	3
HDAC3	ENSG00000171720	5	DisGenNet;Opentarget_textMining;SysID_candidate_ID_genes	3
HDAC4	ENSG00000068024	2	AutDB;DDG2P;DisGenNet;Fulgent_:_gene_panel;HPO;IPA;Ilyas_M_(2020)_F1000Res;Vissers_LE_(2016)_Nat_Rev_Genet;Opentarget_genetic_association;Opentarget_textMining;Phenolyser;Radboudumc_:_Exome_panels;SysID_primary_ID_genes	13
HDAC6	ENSG00000094631	X	DisGenNet;HPO;Vissers_LE_(2016)_Nat_Rev_Genet;Phenolyser;Radboudumc_:_Exome_panels;SysID_candidate_ID_genes	6
HDAC8	ENSG00000147099	X	DDG2P;DisGenNet;Fulgent_:_gene_panel;HPO;IPA;Coe_B.P_(2019)_Nat_Genet;Ilyas_M_(2020)_F1000Res;Vissers_LE_(2016)_Nat_Rev_Genet;Opentarget_genetic_association;Opentarget_textMining;Phenolyser;Radboudumc_:_Exome_panels;SysID_primary_ID_genes	13
HEATR5B	ENSG00000008869	2	Opentarget_genetic_association;Radboudumc_:_Exome_panels;SysID_candidate_ID_genes	3
HECW2	ENSG00000138411	2	DDG2P;DisGenNet;Fulgent_:_gene_panel;HPO;Coe_B.P_(2019)_Nat_Genet;Ilyas_M_(2020)_F1000Res;Opentarget_genetic_association;Opentarget_textMining;Phenolyser;Radboudumc_:_Exome_panels;SysID_primary_ID_genes	11
HELLS	ENSG00000119969	10	DisGenNet;HPO;Opentarget_textMining;Phenolyser	4
HEPACAM	ENSG00000165478	11	DisGenNet;Fulgent_:_gene_panel;HPO;IPA;OMIM-2022-12-09;Opentarget_genetic_association;Opentarget_textMining;Orphanet;Phenolyser;Radboudumc_:_Exome_panels;SysID_primary_ID_genes	11
HEPHL1	ENSG00000181333	11	DisGenNet;HPO;Opentarget_textMining	3
HERC1	ENSG00000103657	15	DisGenNet;HPO;IPA;Ilyas_M_(2020)_F1000Res;Vissers_LE_(2016)_Nat_Rev_Genet;Opentarget_genetic_association;Opentarget_textMining;Phenolyser;Radboudumc_:_Exome_panels;SysID_primary_ID_genes	10
HERC2	ENSG00000128731	15	AutDB;DisGenNet;HPO;IPA;Ilyas_M_(2020)_F1000Res;Vissers_LE_(2016)_Nat_Rev_Genet;OMIM-2022-12-09;Opentarget_genetic_association;Opentarget_textMining;Phenolyser;Radboudumc_:_Exome_panels;SysID_primary_ID_genes	12
HES7	ENSG00000179111	17	DisGenNet;HPO;Opentarget_genetic_association;Phenolyser	4
HESX1	ENSG00000163666	3	DisGenNet;HPO;Ilyas_M_(2020)_F1000Res;Vissers_LE_(2016)_Nat_Rev_Genet;Phenolyser;Radboudumc_:_Exome_panels;SysID_primary_ID_genes	7
HEXA	ENSG00000213614	15	DisGenNet;IPA;Ilyas_M_(2020)_F1000Res;Vissers_LE_(2016)_Nat_Rev_Genet;Opentarget_genetic_association;Opentarget_textMining;Radboudumc_:_Exome_panels;SysID_candidate_ID_genes	8
HEXB	ENSG00000049860	5	Fulgent_:_gene_panel;IPA;Ilyas_M_(2020)_F1000Res;Vissers_LE_(2016)_Nat_Rev_Genet;Opentarget_textMining;Radboudumc_:_Exome_panels;SysID_candidate_ID_genes	7
HGSNAT	ENSG00000165102	8	DDG2P;DisGenNet;HPO;IPA;Ilyas_M_(2020)_F1000Res;Opentarget_genetic_association;Phenolyser;Radboudumc_:_Exome_panels;SysID_primary_ID_genes	9
HHAT	ENSG00000054392	1	DisGenNet;HPO;Phenolyser;SysID_candidate_ID_genes	4
HIBCH	ENSG00000198130	2	DisGenNet;HPO;Opentarget_textMining;Phenolyser	4
HIKESHI	ENSG00000149196	11	DisGenNet;HPO;Opentarget_textMining	3
HINT1	ENSG00000169567	5	DisGenNet;HPO;Ilyas_M_(2020)_F1000Res;Opentarget_textMining	4
HIRA	ENSG00000100084	22	DisGenNet;HPO;Opentarget_textMining;Phenolyser;SysID_candidate_ID_genes	5
HIST1H1E	ENSG00000168298	6	0	0
HIVEP2	ENSG00000010818	6	AutDB;DDG2P;DisGenNet;HPO;IPA;Coe_B.P_(2019)_Nat_Genet;Ilyas_M_(2020)_F1000Res;OMIM-2022-12-09;Opentarget_genetic_association;Opentarget_textMining;Orphanet;Phenolyser;Radboudumc_:_Exome_panels;SysID_primary_ID_genes	14
HK1	ENSG00000156515	10	DisGenNet;HPO;IPA;Opentarget_genetic_association;Radboudumc_:_Exome_panels;SysID_primary_ID_genes	6
HLCS	ENSG00000159267	21	Ilyas_M_(2020)_F1000Res;Vissers_LE_(2016)_Nat_Rev_Genet;Radboudumc_:_Exome_panels;SysID_primary_ID_genes	4
HMGA2	ENSG00000149948	12	DisGenNet;HPO;Opentarget_textMining;Phenolyser	4
HMGB1	ENSG00000189403	13	DDG2P;DisGenNet;Opentarget_genetic_association;Opentarget_textMining;SysID_primary_ID_genes	5
HMGB3	ENSG00000029993	X	DDG2P;DisGenNet;HPO;Phenolyser;SysID_candidate_ID_genes	5
HMGCL	ENSG00000117305	1	DisGenNet;HPO;Ilyas_M_(2020)_F1000Res;Opentarget_genetic_association;Radboudumc_:_Exome_panels;SysID_candidate_ID_genes	6
HNF1B	ENSG00000275410	17	DisGenNet;HPO;Ilyas_M_(2020)_F1000Res;Opentarget_textMining;Phenolyser;SysID_candidate_ID_genes	6
HNF4A	ENSG00000101076	20	DisGenNet;HPO;Ilyas_M_(2020)_F1000Res;Phenolyser	4
HNMT	ENSG00000150540	2	DisGenNet;HPO;IPA;Ilyas_M_(2020)_F1000Res;OMIM-2022-12-09;Opentarget_textMining;Orphanet;Phenolyser;Radboudumc_:_Exome_panels;SysID_primary_ID_genes	10
HNRNPA1	ENSG00000135486	12	DisGenNet;HPO;Phenolyser	3
HNRNPA2B1	ENSG00000122566	7	DisGenNet;HPO;Phenolyser	3
HNRNPH1	ENSG00000169045	5	DisGenNet;IPA;Radboudumc_:_Exome_panels;SysID_primary_ID_genes	4
HNRNPH2	ENSG00000126945	X	AutDB;DDG2P;DisGenNet;HPO;IPA;Ilyas_M_(2020)_F1000Res;OMIM-2022-12-09;Opentarget_textMining;Phenolyser;Radboudumc_:_Exome_panels;SysID_primary_ID_genes	11
HNRNPK	ENSG00000165119	9	DDG2P;DisGenNet;HPO;IPA;Coe_B.P_(2019)_Nat_Genet;Ilyas_M_(2020)_F1000Res;Opentarget_genetic_association;Opentarget_textMining;Phenolyser;Radboudumc_:_Exome_panels;SysID_primary_ID_genes	11
HNRNPR	ENSG00000125944	1	DDG2P;DisGenNet;Opentarget_genetic_association;SysID_primary_ID_genes	4
HNRNPU	ENSG00000153187	1	DisGenNet;HPO;IPA;Coe_B.P_(2019)_Nat_Genet;Ilyas_M_(2020)_F1000Res;Opentarget_genetic_association;Opentarget_textMining;Phenolyser;Radboudumc_:_Exome_panels;SysID_primary_ID_genes	10
HOXA1	ENSG00000105991	7	DisGenNet;Fulgent_:_gene_panel;IPA;Ilyas_M_(2020)_F1000Res;Vissers_LE_(2016)_Nat_Rev_Genet;Opentarget_genetic_association;Phenolyser;Radboudumc_:_Exome_panels;SysID_primary_ID_genes	9
HPD	ENSG00000158104	12	DDG2P;DisGenNet;Fulgent_:_gene_panel;HPO;Ilyas_M_(2020)_F1000Res;Vissers_LE_(2016)_Nat_Rev_Genet;Phenolyser;Radboudumc_:_Exome_panels;SysID_primary_ID_genes	9
HPDL	ENSG00000186603	1	HPO;Opentarget_textMining;Orphanet;Radboudumc_:_Exome_panels;SysID_primary_ID_genes	5
HPRT1	ENSG00000165704	X	DDG2P;DisGenNet;Fulgent_:_gene_panel;HPO;IPA;Ilyas_M_(2020)_F1000Res;Vissers_LE_(2016)_Nat_Rev_Genet;Phenolyser;Radboudumc_:_Exome_panels;SysID_primary_ID_genes	10
HRAS	ENSG00000174775	11	DDG2P;DisGenNet;Fulgent_:_gene_panel;HPO;IPA;Ilyas_M_(2020)_F1000Res;Vissers_LE_(2016)_Nat_Rev_Genet;Opentarget_genetic_association;Opentarget_textMining;Phenolyser;Radboudumc_:_Exome_panels;SysID_primary_ID_genes	12
HS2ST1	ENSG00000153936	1	HPO;Opentarget_genetic_association;Orphanet;Radboudumc_:_Exome_panels;SysID_primary_ID_genes	5
HS6ST2	ENSG00000171004	X	DisGenNet;IPA;Opentarget_textMining;SysID_candidate_ID_genes	4
HSD17B10	ENSG00000072506	X	DDG2P;DisGenNet;Fulgent_:_gene_panel;HPO;IPA;Ilyas_M_(2020)_F1000Res;Vissers_LE_(2016)_Nat_Rev_Genet;Opentarget_textMining;Phenolyser;Radboudumc_:_Exome_panels;SysID_primary_ID_genes	11
HSD17B4	ENSG00000133835	5	DDG2P;DisGenNet;HPO;Opentarget_textMining;Phenolyser	5
HSPD1	ENSG00000144381	2	DDG2P;Fulgent_:_gene_panel;HPO;Ilyas_M_(2020)_F1000Res;Vissers_LE_(2016)_Nat_Rev_Genet;Phenolyser;Radboudumc_:_Exome_panels;SysID_primary_ID_genes	8
HSPG2	ENSG00000142798	1	DDG2P;DisGenNet;HPO;Ilyas_M_(2020)_F1000Res;Phenolyser;SysID_candidate_ID_genes	6
HTR1A	ENSG00000178394	5	DisGenNet;IPA;Opentarget_textMining	3
HTR7	ENSG00000148680	10	DisGenNet;IPA;SysID_candidate_ID_genes	3
HTRA2	ENSG00000115317	2	Ilyas_M_(2020)_F1000Res;Radboudumc_:_Exome_panels;SysID_primary_ID_genes	3
HTT	ENSG00000197386	4	DisGenNet;HPO;Ilyas_M_(2020)_F1000Res;Orphanet;Phenolyser;SysID_primary_ID_genes	6
HUWE1	ENSG00000086758	X	DDG2P;DisGenNet;Fulgent_:_gene_panel;HPO;IPA;Coe_B.P_(2019)_Nat_Genet;Ilyas_M_(2020)_F1000Res;Vissers_LE_(2016)_Nat_Rev_Genet;OMIM-2022-12-09;Opentarget_genetic_association;Opentarget_textMining;Orphanet;Phenolyser;Radboudumc_:_Exome_panels;SysID_primary_ID_genes	15
HYLS1	ENSG00000198331	11	DisGenNet;HPO;IPA;Ilyas_M_(2020)_F1000Res;Phenolyser;Radboudumc_:_Exome_panels;SysID_candidate_ID_genes	7
IARS	ENSG00000196305	9	0	0
IARS1	ENSG00000196305	9	DDG2P;DisGenNet;HPO;IPA;OMIM-2022-12-09;Opentarget_genetic_association;Opentarget_textMining;Orphanet;Radboudumc_:_Exome_panels;SysID_primary_ID_genes	10
IBA57	ENSG00000181873	1	DisGenNet;Ilyas_M_(2020)_F1000Res;Opentarget_textMining;Radboudumc_:_Exome_panels;SysID_candidate_ID_genes	5
ICE2	ENSG00000128915	15	DisGenNet;Opentarget_genetic_association;Opentarget_textMining;SysID_candidate_ID_genes	4
IDH2	ENSG00000182054	15	DisGenNet;Ilyas_M_(2020)_F1000Res;Opentarget_textMining;SysID_primary_ID_genes	4
IDH3A	ENSG00000166411	15	DisGenNet;HPO;Opentarget_textMining;SysID_candidate_ID_genes	4
IDH3B	ENSG00000101365	20	DisGenNet;HPO;Phenolyser	3
IDS	ENSG00000010404	X	DDG2P;DisGenNet;Fulgent_:_gene_panel;HPO;Ilyas_M_(2020)_F1000Res;Vissers_LE_(2016)_Nat_Rev_Genet;Opentarget_textMining;Phenolyser;Radboudumc_:_Exome_panels;SysID_primary_ID_genes	10
IDUA	ENSG00000127415	4	DDG2P;DisGenNet;HPO;Ilyas_M_(2020)_F1000Res;Vissers_LE_(2016)_Nat_Rev_Genet;Phenolyser;Radboudumc_:_Exome_panels;SysID_primary_ID_genes	8
IER3IP1	ENSG00000134049	18	DisGenNet;HPO;Ilyas_M_(2020)_F1000Res;Vissers_LE_(2016)_Nat_Rev_Genet;Opentarget_genetic_association;Phenolyser;Radboudumc_:_Exome_panels;SysID_primary_ID_genes	8
IFIH1	ENSG00000115267	2	DisGenNet;HPO;Ilyas_M_(2020)_F1000Res;Phenolyser;Radboudumc_:_Exome_panels;SysID_primary_ID_genes	6
IFNG	ENSG00000111537	12	HPO;Opentarget_textMining;Phenolyser	3
IFT140	ENSG00000187535	16	DisGenNet;HPO;Phenolyser;SysID_candidate_ID_genes	4
IFT172	ENSG00000138002	2	DisGenNet;HPO;Ilyas_M_(2020)_F1000Res;Vissers_LE_(2016)_Nat_Rev_Genet;Phenolyser;Radboudumc_:_Exome_panels;SysID_primary_ID_genes	7
IFT27	ENSG00000100360	22	DisGenNet;HPO;Opentarget_textMining;Phenolyser;Radboudumc_:_Exome_panels;SysID_candidate_ID_genes	6
IFT74	ENSG00000096872	9	DisGenNet;HPO;Phenolyser;SysID_primary_ID_genes	4
IFT88	ENSG00000032742	13	DisGenNet;HPO;Phenolyser	3
IGBP1	ENSG00000089289	X	DDG2P;DisGenNet;Fulgent_:_gene_panel;HPO;IPA;Vissers_LE_(2016)_Nat_Rev_Genet;OMIM-2022-12-09;Orphanet;Phenolyser;Radboudumc_:_Exome_panels;SysID_candidate_ID_genes	11
IGF1	ENSG00000017427	12	DDG2P;DisGenNet;Fulgent_:_gene_panel;HPO;Ilyas_M_(2020)_F1000Res;Vissers_LE_(2016)_Nat_Rev_Genet;OMIM-2022-12-09;Opentarget_genetic_association;Opentarget_textMining;Phenolyser;Radboudumc_:_Exome_panels;SysID_primary_ID_genes	12
IGF1R	ENSG00000140443	15	DisGenNet;Fulgent_:_gene_panel;HPO;IPA;Ilyas_M_(2020)_F1000Res;Opentarget_genetic_association;Opentarget_textMining;Phenolyser;Radboudumc_:_Exome_panels;SysID_primary_ID_genes	10
IGF2	ENSG00000167244	11	DisGenNet;HPO;Ilyas_M_(2020)_F1000Res;Opentarget_textMining;Phenolyser;SysID_candidate_ID_genes	6
IKBKG	ENSG00000269335	X	DDG2P;DisGenNet;HPO;Ilyas_M_(2020)_F1000Res;Vissers_LE_(2016)_Nat_Rev_Genet;Opentarget_textMining;Phenolyser;Radboudumc_:_Exome_panels;SysID_primary_ID_genes	9
IL1RAPL1	ENSG00000169306	X	DDG2P;DisGenNet;Fulgent_:_gene_panel;HPO;IPA;Ilyas_M_(2020)_F1000Res;Mireia_Coll-TanÃ©_(2019)_Dis_Model_Mech;Vissers_LE_(2016)_Nat_Rev_Genet;OMIM-2022-12-09;Opentarget_genetic_association;Opentarget_textMining;Orphanet;Phenolyser;Radboudumc_:_Exome_panels;SysID_primary_ID_genes	15
IL1RAPL2	ENSG00000189108	X	DisGenNet;Ilyas_M_(2020)_F1000Res;Opentarget_textMining	3
IMMP2L	ENSG00000184903	7	Fulgent_:_gene_panel;Opentarget_textMining;SysID_candidate_ID_genes	3
IMPA1	ENSG00000133731	8	DisGenNet;Fulgent_:_gene_panel;HPO;IPA;Ilyas_M_(2020)_F1000Res;OMIM-2022-12-09;Opentarget_textMining;Orphanet;Phenolyser;Radboudumc_:_Exome_panels;SysID_primary_ID_genes	11
IMPDH1	ENSG00000106348	7	DisGenNet;HPO;Phenolyser	3
IMPG2	ENSG00000081148	3	DisGenNet;HPO;Phenolyser	3
INPP4A	ENSG00000040933	2	DisGenNet;IPA;Ilyas_M_(2020)_F1000Res;Opentarget_genetic_association;SysID_primary_ID_genes	5
INPP5E	ENSG00000148384	9	DDG2P;DisGenNet;HPO;IPA;Ilyas_M_(2020)_F1000Res;Vissers_LE_(2016)_Nat_Rev_Genet;OMIM-2022-12-09;Opentarget_textMining;Phenolyser;Radboudumc_:_Exome_panels;SysID_primary_ID_genes	11
INPP5K	ENSG00000132376	17	DDG2P;DisGenNet;HPO;IPA;Ilyas_M_(2020)_F1000Res;OMIM-2022-12-09;Opentarget_textMining;Phenolyser;Radboudumc_:_Exome_panels;SysID_primary_ID_genes	10
INS	ENSG00000254647	11	DisGenNet;HPO;Opentarget_textMining;Phenolyser	4
INSR	ENSG00000171105	19	DisGenNet;HPO;Opentarget_textMining;Phenolyser	4
INTS1	ENSG00000164880	7	DisGenNet;IPA;Opentarget_textMining;Radboudumc_:_Exome_panels;SysID_primary_ID_genes	5
INVS	ENSG00000119509	9	DisGenNet;HPO;Opentarget_textMining;Phenolyser	4
IPW	0	0	DisGenNet;HPO;Phenolyser	3
IQCB1	ENSG00000173226	3	DisGenNet;HPO;Phenolyser	3
IQSEC1	ENSG00000144711	3	DDG2P;DisGenNet;HPO;IPA;OMIM-2022-12-09;Opentarget_genetic_association;Opentarget_textMining;Orphanet;Radboudumc_:_Exome_panels;SysID_primary_ID_genes	10
IQSEC2	ENSG00000124313	X	AutDB;DDG2P;DisGenNet;Fulgent_:_gene_panel;HPO;IPA;Coe_B.P_(2019)_Nat_Genet;Ilyas_M_(2020)_F1000Res;Vissers_LE_(2016)_Nat_Rev_Genet;OMIM-2022-12-09;Opentarget_genetic_association;Opentarget_textMining;Orphanet;Phenolyser;Radboudumc_:_Exome_panels;SysID_primary_ID_genes	16
IRF2BPL	ENSG00000119669	14	DisGenNet;HPO;IPA;Ilyas_M_(2020)_F1000Res;Opentarget_genetic_association;Phenolyser;Radboudumc_:_Exome_panels;SysID_primary_ID_genes	8
IRF6	ENSG00000117595	1	DisGenNet;Ilyas_M_(2020)_F1000Res;Phenolyser	3
IRX5	ENSG00000176842	16	DisGenNet;Fulgent_:_gene_panel;HPO;IPA;Ilyas_M_(2020)_F1000Res;Orphanet;Phenolyser;Radboudumc_:_Exome_panels;SysID_primary_ID_genes	9
ISCA1	ENSG00000135070	9	DisGenNet;HPO;Phenolyser	3
ISPD	ENSG00000214960	7	0	0
ITCH	ENSG00000078747	20	DDG2P;DisGenNet;HPO;Phenolyser	4
ITGA7	ENSG00000135424	12	DDG2P;DisGenNet;Fulgent_:_gene_panel;HPO;Ilyas_M_(2020)_F1000Res;Phenolyser;Radboudumc_:_Exome_panels;SysID_candidate_ID_genes	8
ITGB3	ENSG00000259207	17	IPA;Opentarget_textMining;Phenolyser	3
ITGB6	ENSG00000115221	2	DisGenNet;HPO;Opentarget_textMining;Orphanet;Phenolyser	5
ITIH6	ENSG00000102313	X	IPA;Opentarget_genetic_association;SysID_candidate_ID_genes	3
ITPA	ENSG00000125877	20	Opentarget_genetic_association;Radboudumc_:_Exome_panels;SysID_primary_ID_genes	3
ITPR1	ENSG00000150995	3	DisGenNet;Fulgent_:_gene_panel;HPO;IPA;Coe_B.P_(2019)_Nat_Genet;Ilyas_M_(2020)_F1000Res;Vissers_LE_(2016)_Nat_Rev_Genet;Opentarget_genetic_association;Opentarget_textMining;Orphanet;Phenolyser;Radboudumc_:_Exome_panels;SysID_primary_ID_genes	13
ITSN1	ENSG00000205726	21	DisGenNet;HPO;Opentarget_textMining;Orphanet;SysID_primary_ID_genes	5
IVD	ENSG00000128928	15	DDG2P;DisGenNet;HPO;Phenolyser	4
IYD	ENSG00000009765	6	DisGenNet;HPO;Phenolyser;SysID_candidate_ID_genes	4
JAG1	ENSG00000101384	20	HPO;Ilyas_M_(2020)_F1000Res;Vissers_LE_(2016)_Nat_Rev_Genet;Phenolyser;Radboudumc_:_Exome_panels;SysID_candidate_ID_genes	6
JAM3	ENSG00000166086	11	Ilyas_M_(2020)_F1000Res;Vissers_LE_(2016)_Nat_Rev_Genet;Radboudumc_:_Exome_panels;SysID_primary_ID_genes	4
JARID2	ENSG00000008083	6	DisGenNet;HPO;OMIM-2022-12-09;Opentarget_genetic_association;Opentarget_textMining;Orphanet;Radboudumc_:_Exome_panels;SysID_primary_ID_genes	8
JMJD1C	ENSG00000171988	10	DisGenNet;HPO;IPA;Opentarget_genetic_association;Opentarget_textMining;Phenolyser;Radboudumc_:_Exome_panels;SysID_candidate_ID_genes	8
KALRN	ENSG00000160145	3	DisGenNet;Opentarget_textMining;SysID_candidate_ID_genes	3
KANK1	ENSG00000107104	9	DDG2P;DisGenNet;HPO;Vissers_LE_(2016)_Nat_Rev_Genet;Opentarget_textMining;Phenolyser;Radboudumc_:_Exome_panels;SysID_candidate_ID_genes	8
KANSL1	ENSG00000120071	17	DDG2P;DisGenNet;HPO;IPA;Coe_B.P_(2019)_Nat_Genet;Ilyas_M_(2020)_F1000Res;Vissers_LE_(2016)_Nat_Rev_Genet;Opentarget_genetic_association;Opentarget_textMining;Phenolyser;Radboudumc_:_Exome_panels;SysID_primary_ID_genes	12
KARS1	ENSG00000065427	16	DDG2P;DisGenNet;HPO;Opentarget_genetic_association;Opentarget_textMining	5
KAT5	ENSG00000172977	11	HPO;IPA;Opentarget_genetic_association;Radboudumc_:_Exome_panels;SysID_primary_ID_genes	5
KAT6A	ENSG00000083168	8	AutDB;DDG2P;DisGenNet;Fulgent_:_gene_panel;HPO;IPA;Coe_B.P_(2019)_Nat_Genet;Ilyas_M_(2020)_F1000Res;Vissers_LE_(2016)_Nat_Rev_Genet;Opentarget_genetic_association;Opentarget_textMining;Orphanet;Phenolyser;Radboudumc_:_Exome_panels;SysID_primary_ID_genes	15
KAT6B	ENSG00000156650	10	DDG2P;DisGenNet;Fulgent_:_gene_panel;HPO;IPA;Coe_B.P_(2019)_Nat_Genet;Ilyas_M_(2020)_F1000Res;Vissers_LE_(2016)_Nat_Rev_Genet;Opentarget_genetic_association;Opentarget_textMining;Orphanet;Phenolyser;Radboudumc_:_Exome_panels;SysID_primary_ID_genes	14
KAT8	ENSG00000103510	16	DisGenNet;HPO;IPA;Opentarget_genetic_association;Opentarget_textMining;Orphanet;Radboudumc_:_Exome_panels;SysID_primary_ID_genes	8
KATNAL2	ENSG00000167216	18	Fulgent_:_gene_panel;IPA;SysID_primary_ID_genes	3
KATNB1	ENSG00000140854	16	HPO;Radboudumc_:_Exome_panels;SysID_primary_ID_genes	3
KCNA1	ENSG00000111262	12	DisGenNet;HPO;SysID_primary_ID_genes	3
KCNA2	ENSG00000177301	1	DisGenNet;HPO;Ilyas_M_(2020)_F1000Res;Opentarget_genetic_association;Opentarget_textMining;Phenolyser;Radboudumc_:_Exome_panels;SysID_primary_ID_genes	8
KCNA4	ENSG00000182255	11	DDG2P;IPA;OMIM-2022-12-09;Opentarget_textMining;Radboudumc_:_Exome_panels;SysID_candidate_ID_genes	6
KCNAB2	ENSG00000069424	1	DisGenNet;HPO;Opentarget_textMining;Phenolyser	4
KCNB1	ENSG00000158445	20	DisGenNet;Fulgent_:_gene_panel;HPO;IPA;Ilyas_M_(2020)_F1000Res;Opentarget_genetic_association;Opentarget_textMining;Radboudumc_:_Exome_panels;SysID_primary_ID_genes	9
KCNC1	ENSG00000129159	11	DisGenNet;Ilyas_M_(2020)_F1000Res;Opentarget_textMining;Radboudumc_:_Exome_panels;SysID_primary_ID_genes	5
KCNC2	ENSG00000166006	12	HPO;Opentarget_genetic_association;SysID_primary_ID_genes	3
KCNC3	ENSG00000131398	19	DDG2P;DisGenNet;HPO;Ilyas_M_(2020)_F1000Res;Opentarget_textMining;Phenolyser;Radboudumc_:_Exome_panels;SysID_candidate_ID_genes	8
KCND3	ENSG00000171385	1	DisGenNet;Ilyas_M_(2020)_F1000Res;Opentarget_genetic_association;Opentarget_textMining;SysID_candidate_ID_genes	5
KCNE5	ENSG00000176076	X	DisGenNet;HPO;Opentarget_textMining;Orphanet	4
KCNH1	ENSG00000143473	1	DDG2P;DisGenNet;HPO;IPA;Coe_B.P_(2019)_Nat_Genet;Ilyas_M_(2020)_F1000Res;Vissers_LE_(2016)_Nat_Rev_Genet;Opentarget_genetic_association;Opentarget_textMining;Phenolyser;Radboudumc_:_Exome_panels;SysID_primary_ID_genes	12
KCNJ1	ENSG00000151704	11	DisGenNet;HPO;Opentarget_genetic_association;Phenolyser	4
KCNJ10	ENSG00000177807	1	DDG2P;DisGenNet;Fulgent_:_gene_panel;HPO;IPA;Ilyas_M_(2020)_F1000Res;Vissers_LE_(2016)_Nat_Rev_Genet;Opentarget_genetic_association;Opentarget_textMining;Phenolyser;Radboudumc_:_Exome_panels;SysID_primary_ID_genes	12
KCNJ11	ENSG00000187486	11	DisGenNet;Fulgent_:_gene_panel;HPO;Ilyas_M_(2020)_F1000Res;Vissers_LE_(2016)_Nat_Rev_Genet;Phenolyser;Radboudumc_:_Exome_panels;SysID_primary_ID_genes	8
KCNJ13	ENSG00000115474	2	DisGenNet;HPO;Phenolyser	3
KCNJ16	ENSG00000153822	17	DisGenNet;Opentarget_textMining;SysID_candidate_ID_genes	3
KCNJ6	ENSG00000157542	21	DDG2P;DisGenNet;HPO;IPA;Ilyas_M_(2020)_F1000Res;Opentarget_textMining;Phenolyser;Radboudumc_:_Exome_panels;SysID_primary_ID_genes	9
KCNJ8	ENSG00000121361	12	DisGenNet;HPO;Phenolyser	3
KCNK3	ENSG00000171303	2	Coe_B.P_(2019)_Nat_Genet;Opentarget_textMining;SysID_candidate_ID_genes	3
KCNK4	ENSG00000182450	11	DDG2P;DisGenNet;Opentarget_genetic_association;Opentarget_textMining;Orphanet;Radboudumc_:_Exome_panels;SysID_primary_ID_genes	7
KCNK9	ENSG00000169427	8	DDG2P;DisGenNet;Fulgent_:_gene_panel;HPO;IPA;Ilyas_M_(2020)_F1000Res;Vissers_LE_(2016)_Nat_Rev_Genet;Opentarget_textMining;Orphanet;Phenolyser;Radboudumc_:_Exome_panels;SysID_primary_ID_genes	12
KCNMA1	ENSG00000156113	10	DisGenNet;HPO;IPA;Opentarget_genetic_association;Opentarget_textMining;Orphanet;Phenolyser;Radboudumc_:_Exome_panels;SysID_primary_ID_genes	9
KCNN2	ENSG00000080709	5	HPO;Opentarget_genetic_association;Radboudumc_:_Exome_panels;SysID_primary_ID_genes	4
KCNN3	ENSG00000143603	1	HPO;IPA;Radboudumc_:_Exome_panels;SysID_primary_ID_genes	4
KCNQ1OT1	ENSG00000269821	11	DisGenNet;HPO;Opentarget_textMining;Phenolyser	4
KCNQ2	ENSG00000075043	20	DDG2P;DisGenNet;Fulgent_:_gene_panel;HPO;IPA;Coe_B.P_(2019)_Nat_Genet;Ilyas_M_(2020)_F1000Res;Vissers_LE_(2016)_Nat_Rev_Genet;Opentarget_genetic_association;Opentarget_textMining;Orphanet;Phenolyser;Radboudumc_:_Exome_panels;SysID_primary_ID_genes	14
KCNQ3	ENSG00000184156	8	DisGenNet;IPA;Coe_B.P_(2019)_Nat_Genet;Ilyas_M_(2020)_F1000Res;Opentarget_genetic_association;Opentarget_textMining;Radboudumc_:_Exome_panels;SysID_primary_ID_genes	8
KCNQ5	ENSG00000185760	6	DDG2P;DisGenNet;HPO;IPA;Ilyas_M_(2020)_F1000Res;OMIM-2022-12-09;Opentarget_genetic_association;Opentarget_textMining;Orphanet;Phenolyser;Radboudumc_:_Exome_panels;SysID_primary_ID_genes	12
KCNT1	ENSG00000107147	9	DisGenNet;HPO;Ilyas_M_(2020)_F1000Res;Vissers_LE_(2016)_Nat_Rev_Genet;Opentarget_textMining;Phenolyser;Radboudumc_:_Exome_panels;SysID_primary_ID_genes	8
KCNT2	ENSG00000162687	1	DDG2P;DisGenNet;HPO;Phenolyser	4
KCTD3	ENSG00000136636	1	Opentarget_textMining;Radboudumc_:_Exome_panels;SysID_candidate_ID_genes	3
KCTD7	ENSG00000243335	7	DDG2P;DisGenNet;Fulgent_:_gene_panel;HPO;Ilyas_M_(2020)_F1000Res;Vissers_LE_(2016)_Nat_Rev_Genet;Opentarget_genetic_association;Phenolyser;Radboudumc_:_Exome_panels;SysID_primary_ID_genes	10
KDM1A	ENSG00000004487	1	DisGenNet;IPA;Ilyas_M_(2020)_F1000Res;Opentarget_genetic_association;Opentarget_textMining;Radboudumc_:_Exome_panels;SysID_primary_ID_genes	7
KDM2B	ENSG00000089094	12	DisGenNet;Opentarget_textMining;SysID_candidate_ID_genes	3
KDM3B	ENSG00000120733	5	DDG2P;DisGenNet;HPO;IPA;Opentarget_genetic_association;Opentarget_textMining;Orphanet;Radboudumc_:_Exome_panels;SysID_primary_ID_genes	9
KDM4B	ENSG00000127663	19	HPO;IPA;OMIM-2022-12-09;Orphanet;Radboudumc_:_Exome_panels;SysID_primary_ID_genes	6
KDM5A	ENSG00000073614	12	DisGenNet;IPA;Ilyas_M_(2020)_F1000Res;Opentarget_genetic_association;Opentarget_textMining;SysID_primary_ID_genes	6
KDM5B	ENSG00000117139	1	DDG2P;DisGenNet;Fulgent_:_gene_panel;HPO;IPA;Ilyas_M_(2020)_F1000Res;OMIM-2022-12-09;Opentarget_genetic_association;Opentarget_textMining;Orphanet;Phenolyser;Radboudumc_:_Exome_panels;SysID_primary_ID_genes	13
KDM5C	ENSG00000126012	X	DDG2P;DisGenNet;Fulgent_:_gene_panel;HPO;IPA;Ilyas_M_(2020)_F1000Res;Vissers_LE_(2016)_Nat_Rev_Genet;OMIM-2022-12-09;Opentarget_genetic_association;Opentarget_textMining;Orphanet;Phenolyser;Radboudumc_:_Exome_panels;SysID_primary_ID_genes	14
KDM6A	ENSG00000147050	X	DisGenNet;Fulgent_:_gene_panel;HPO;IPA;Ilyas_M_(2020)_F1000Res;Vissers_LE_(2016)_Nat_Rev_Genet;Opentarget_genetic_association;Opentarget_textMining;Phenolyser;Radboudumc_:_Exome_panels;SysID_primary_ID_genes	11
KDM6B	ENSG00000132510	17	DisGenNet;Ilyas_M_(2020)_F1000Res;Opentarget_genetic_association;Opentarget_textMining;Radboudumc_:_Exome_panels;SysID_primary_ID_genes	6
KDSR	ENSG00000119537	18	DisGenNet;HPO;IPA;Phenolyser	4
KIAA0586	ENSG00000100578	14	DisGenNet;HPO;Ilyas_M_(2020)_F1000Res;Opentarget_genetic_association;Phenolyser;Radboudumc_:_Exome_panels;SysID_primary_ID_genes	7
KIAA0753	ENSG00000198920	17	DisGenNet;HPO;Phenolyser;SysID_candidate_ID_genes	4
KIAA1109	ENSG00000138688	4	DisGenNet;Ilyas_M_(2020)_F1000Res;Vissers_LE_(2016)_Nat_Rev_Genet;Phenolyser;Radboudumc_:_Exome_panels;SysID_primary_ID_genes	6
KIAA1279	ENSG00000198954	10	0	0
KIAA2022	ENSG00000050030	X	0	0
KIDINS220	ENSG00000134313	2	DDG2P;DisGenNet;HPO;IPA;Ilyas_M_(2020)_F1000Res;OMIM-2022-12-09;Opentarget_genetic_association;Opentarget_textMining;Orphanet;Phenolyser;Radboudumc_:_Exome_panels;SysID_primary_ID_genes	12
KIF11	ENSG00000138160	10	DDG2P;DisGenNet;Fulgent_:_gene_panel;HPO;IPA;Coe_B.P_(2019)_Nat_Genet;Ilyas_M_(2020)_F1000Res;Vissers_LE_(2016)_Nat_Rev_Genet;OMIM-2022-12-09;Opentarget_genetic_association;Opentarget_textMining;Phenolyser;Radboudumc_:_Exome_panels;SysID_primary_ID_genes	14
KIF14	ENSG00000118193	1	DDG2P;DisGenNet;HPO;Opentarget_textMining;Phenolyser;Radboudumc_:_Exome_panels;SysID_primary_ID_genes	7
KIF15	ENSG00000163808	3	DisGenNet;HPO;SysID_candidate_ID_genes	3
KIF16B	ENSG00000089177	20	DisGenNet;IPA;Opentarget_genetic_association;SysID_candidate_ID_genes	4
KIF1A	ENSG00000130294	2	DisGenNet;Fulgent_:_gene_panel;HPO;IPA;Coe_B.P_(2019)_Nat_Genet;Ilyas_M_(2020)_F1000Res;Vissers_LE_(2016)_Nat_Rev_Genet;Opentarget_genetic_association;Opentarget_textMining;Orphanet;Phenolyser;Radboudumc_:_Exome_panels;SysID_primary_ID_genes	13
KIF1B	ENSG00000054523	1	DisGenNet;IPA;Opentarget_genetic_association;Opentarget_textMining	4
KIF1C	ENSG00000129250	17	DisGenNet;HPO;IPA;Opentarget_genetic_association;Phenolyser	5
KIF21B	ENSG00000116852	1	Opentarget_genetic_association;Opentarget_textMining;Radboudumc_:_Exome_panels;SysID_primary_ID_genes	4
KIF2A	ENSG00000068796	5	IPA;Ilyas_M_(2020)_F1000Res;Opentarget_textMining;Phenolyser;Radboudumc_:_Exome_panels;SysID_primary_ID_genes	6
KIF4A	ENSG00000090889	X	DDG2P;DisGenNet;HPO;IPA;OMIM-2022-12-09;Opentarget_genetic_association;Opentarget_textMining;Phenolyser;Radboudumc_:_Exome_panels;SysID_primary_ID_genes	10
KIF5A	ENSG00000155980	12	DisGenNet;Fulgent_:_gene_panel;HPO;Ilyas_M_(2020)_F1000Res;Opentarget_genetic_association;Radboudumc_:_Exome_panels;SysID_primary_ID_genes	7
KIF5C	ENSG00000168280	2	DisGenNet;HPO;IPA;Ilyas_M_(2020)_F1000Res;Vissers_LE_(2016)_Nat_Rev_Genet;Opentarget_textMining;Phenolyser;Radboudumc_:_Exome_panels;SysID_primary_ID_genes	9
KIF7	ENSG00000166813	15	DDG2P;DisGenNet;Fulgent_:_gene_panel;HPO;IPA;Ilyas_M_(2020)_F1000Res;Vissers_LE_(2016)_Nat_Rev_Genet;Opentarget_genetic_association;Opentarget_textMining;Phenolyser;Radboudumc_:_Exome_panels;SysID_primary_ID_genes	12
KIFBP	ENSG00000198954	10	DDG2P;DisGenNet;HPO;Opentarget_textMining;Radboudumc_:_Exome_panels;SysID_primary_ID_genes	6
KIRREL3	ENSG00000149571	11	DDG2P;DisGenNet;Fulgent_:_gene_panel;HPO;IPA;Ilyas_M_(2020)_F1000Res;Vissers_LE_(2016)_Nat_Rev_Genet;Opentarget_genetic_association;Opentarget_textMining;Orphanet;Phenolyser;Radboudumc_:_Exome_panels;SysID_candidate_ID_genes	13
KIT	ENSG00000157404	4	DisGenNet;HPO;Ilyas_M_(2020)_F1000Res;Phenolyser	4
KIZ	ENSG00000088970	20	DisGenNet;HPO;Phenolyser	3
KLF7	ENSG00000118263	2	DisGenNet;Opentarget_genetic_association;Opentarget_textMining;Radboudumc_:_Exome_panels	4
KLF8	ENSG00000102349	X	DisGenNet;Fulgent_:_gene_panel;Opentarget_textMining	3
KLHL15	ENSG00000174010	X	DDG2P;DisGenNet;HPO;IPA;Ilyas_M_(2020)_F1000Res;OMIM-2022-12-09;Opentarget_genetic_association;Opentarget_textMining;Phenolyser;Radboudumc_:_Exome_panels;SysID_primary_ID_genes	11
KLHL7	ENSG00000122550	7	DisGenNet;HPO;Phenolyser;SysID_primary_ID_genes	4
KLLN	ENSG00000227268	10	DisGenNet;HPO;Phenolyser	3
KMT2A	ENSG00000118058	11	DDG2P;DisGenNet;Fulgent_:_gene_panel;HPO;IPA;Coe_B.P_(2019)_Nat_Genet;Ilyas_M_(2020)_F1000Res;Vissers_LE_(2016)_Nat_Rev_Genet;Opentarget_genetic_association;Opentarget_textMining;Phenolyser;Radboudumc_:_Exome_panels;SysID_primary_ID_genes	13
KMT2B	ENSG00000272333	19	DDG2P;DisGenNet;HPO;IPA;Ilyas_M_(2020)_F1000Res;OMIM-2022-12-09;Opentarget_genetic_association;Orphanet;Radboudumc_:_Exome_panels;SysID_primary_ID_genes	10
KMT2C	ENSG00000055609	7	DDG2P;DisGenNet;HPO;IPA;Coe_B.P_(2019)_Nat_Genet;Ilyas_M_(2020)_F1000Res;Mireia_Coll-TanÃ©_(2019)_Dis_Model_Mech;Opentarget_genetic_association;Opentarget_textMining;Phenolyser;Radboudumc_:_Exome_panels;SysID_primary_ID_genes	12
KMT2D	ENSG00000167548	12	DDG2P;DisGenNet;Fulgent_:_gene_panel;HPO;IPA;Ilyas_M_(2020)_F1000Res;Vissers_LE_(2016)_Nat_Rev_Genet;Opentarget_genetic_association;Opentarget_textMining;Phenolyser;Radboudumc_:_Exome_panels;SysID_primary_ID_genes	12
KMT2E	ENSG00000005483	7	DDG2P;DisGenNet;HPO;IPA;Opentarget_genetic_association;Opentarget_textMining;Orphanet;Radboudumc_:_Exome_panels;SysID_primary_ID_genes	9
KMT5B	ENSG00000110066	11	DDG2P;DisGenNet;Fulgent_:_gene_panel;HPO;IPA;OMIM-2022-12-09;Opentarget_genetic_association;Radboudumc_:_Exome_panels;SysID_primary_ID_genes	9
KNL1	ENSG00000137812	15	DisGenNet;HPO;Ilyas_M_(2020)_F1000Res;Radboudumc_:_Exome_panels;SysID_candidate_ID_genes	5
KPNA7	ENSG00000185467	7	DisGenNet;Opentarget_genetic_association;SysID_primary_ID_genes	3
KPTN	ENSG00000118162	19	AutDB;DisGenNet;HPO;IPA;Ilyas_M_(2020)_F1000Res;Vissers_LE_(2016)_Nat_Rev_Genet;OMIM-2022-12-09;Opentarget_genetic_association;Opentarget_textMining;Phenolyser;Radboudumc_:_Exome_panels;SysID_primary_ID_genes	12
KRAS	ENSG00000133703	12	DDG2P;DisGenNet;Fulgent_:_gene_panel;HPO;Ilyas_M_(2020)_F1000Res;Vissers_LE_(2016)_Nat_Rev_Genet;Phenolyser;Radboudumc_:_Exome_panels;SysID_primary_ID_genes	9
KRBOX4	ENSG00000147121	X	Vissers_LE_(2016)_Nat_Rev_Genet;Opentarget_textMining;SysID_candidate_ID_genes	3
KRT81	ENSG00000205426	12	DisGenNet;HPO;Phenolyser	3
KRT83	ENSG00000170523	12	DisGenNet;HPO;Phenolyser	3
KRT86	ENSG00000170442	12	DisGenNet;HPO;Phenolyser	3
KY	ENSG00000174611	3	DisGenNet;HPO;SysID_candidate_ID_genes	3
KYNU	ENSG00000115919	2	DisGenNet;HPO;Phenolyser;SysID_candidate_ID_genes	4
L1CAM	ENSG00000198910	X	DDG2P;DisGenNet;Fulgent_:_gene_panel;HPO;IPA;Ilyas_M_(2020)_F1000Res;Vissers_LE_(2016)_Nat_Rev_Genet;Opentarget_genetic_association;Opentarget_textMining;Phenolyser;Radboudumc_:_Exome_panels;SysID_primary_ID_genes	12
L2HGDH	ENSG00000087299	14	DDG2P;DisGenNet;HPO;IPA;Ilyas_M_(2020)_F1000Res;Vissers_LE_(2016)_Nat_Rev_Genet;Opentarget_textMining;Phenolyser;Radboudumc_:_Exome_panels;SysID_primary_ID_genes	10
LAGE3	ENSG00000196976	X	DisGenNet;HPO;Phenolyser;SysID_primary_ID_genes	4
LAMA1	ENSG00000101680	18	DisGenNet;HPO;IPA;Ilyas_M_(2020)_F1000Res;Vissers_LE_(2016)_Nat_Rev_Genet;Opentarget_textMining;Orphanet;Radboudumc_:_Exome_panels;SysID_primary_ID_genes	9
LAMA2	ENSG00000196569	6	DDG2P;DisGenNet;Fulgent_:_gene_panel;HPO;IPA;Ilyas_M_(2020)_F1000Res;Vissers_LE_(2016)_Nat_Rev_Genet;Opentarget_genetic_association;Opentarget_textMining;Phenolyser;Radboudumc_:_Exome_panels;SysID_primary_ID_genes	12
LAMB1	ENSG00000091136	7	DisGenNet;HPO;IPA;Ilyas_M_(2020)_F1000Res;Opentarget_genetic_association;Phenolyser;Radboudumc_:_Exome_panels;SysID_primary_ID_genes	8
LAMB2	ENSG00000172037	3	DisGenNet;HPO;Phenolyser;Radboudumc_:_Exome_panels	4
LAMC3	ENSG00000050555	9	Fulgent_:_gene_panel;IPA;Ilyas_M_(2020)_F1000Res;Vissers_LE_(2016)_Nat_Rev_Genet;Opentarget_genetic_association;Radboudumc_:_Exome_panels;SysID_primary_ID_genes	7
LAMP2	ENSG00000005893	X	DDG2P;DisGenNet;Fulgent_:_gene_panel;HPO;IPA;Ilyas_M_(2020)_F1000Res;Vissers_LE_(2016)_Nat_Rev_Genet;Opentarget_genetic_association;Opentarget_textMining;Phenolyser;Radboudumc_:_Exome_panels;SysID_primary_ID_genes	12
LARGE	ENSG00000133424	22	0	0
LARGE1	ENSG00000133424	22	DDG2P;DisGenNet;Fulgent_:_gene_panel;HPO;IPA;Ilyas_M_(2020)_F1000Res;Opentarget_genetic_association;Opentarget_textMining;Orphanet;Radboudumc_:_Exome_panels;SysID_primary_ID_genes	11
LARP4B	ENSG00000107929	10	IPA;Coe_B.P_(2019)_Nat_Genet;SysID_candidate_ID_genes	3
LARP7	ENSG00000174720	4	DDG2P;DisGenNet;HPO;IPA;Ilyas_M_(2020)_F1000Res;Vissers_LE_(2016)_Nat_Rev_Genet;Opentarget_genetic_association;Opentarget_textMining;Phenolyser;Radboudumc_:_Exome_panels;SysID_primary_ID_genes	11
LARS1	ENSG00000133706	5	DisGenNet;HPO;Opentarget_genetic_association;Opentarget_textMining	4
LAS1L	ENSG00000001497	X	DDG2P;DisGenNet;Fulgent_:_gene_panel;HPO;IPA;Opentarget_genetic_association;Phenolyser;Radboudumc_:_Exome_panels;SysID_primary_ID_genes	9
LBR	ENSG00000143815	1	DisGenNet;HPO;Phenolyser	3
LCA5	ENSG00000135338	6	DisGenNet;HPO;Phenolyser	3
LDHD	ENSG00000166816	16	DisGenNet;HPO;IPA;SysID_candidate_ID_genes	4
LEMD3	ENSG00000174106	12	DisGenNet;HPO;Ilyas_M_(2020)_F1000Res;Phenolyser	4
LEPR	ENSG00000116678	1	DisGenNet;Opentarget_textMining;Phenolyser	3
LETM1	ENSG00000168924	4	DisGenNet;HPO;Opentarget_genetic_association;Opentarget_textMining;Phenolyser	5
LFNG	ENSG00000106003	7	DisGenNet;HPO;Ilyas_M_(2020)_F1000Res;Phenolyser	4
LGI3	ENSG00000168481	8	HPO;OMIM-2022-12-09;SysID_candidate_ID_genes	3
LGI4	ENSG00000153902	19	DisGenNet;Ilyas_M_(2020)_F1000Res;SysID_candidate_ID_genes	3
LHX1	ENSG00000273706	17	DisGenNet;HPO;Phenolyser	3
LHX3	ENSG00000107187	9	DDG2P;DisGenNet;Fulgent_:_gene_panel;HPO;Ilyas_M_(2020)_F1000Res;Phenolyser;SysID_candidate_ID_genes	7
LHX4	ENSG00000121454	1	DisGenNet;HPO;Ilyas_M_(2020)_F1000Res;Phenolyser	4
LIAS	ENSG00000121897	4	DisGenNet;HPO;Phenolyser	3
LIG4	ENSG00000174405	13	DisGenNet;Fulgent_:_gene_panel;HPO;Ilyas_M_(2020)_F1000Res;Vissers_LE_(2016)_Nat_Rev_Genet;Opentarget_textMining;Phenolyser;Radboudumc_:_Exome_panels;SysID_primary_ID_genes	9
LIMK1	ENSG00000106683	7	DisGenNet;HPO;Opentarget_textMining;Phenolyser	4
LINGO1	ENSG00000169783	15	DDG2P;DisGenNet;HPO;IPA;OMIM-2022-12-09;Opentarget_textMining;Phenolyser;Radboudumc_:_Exome_panels;SysID_primary_ID_genes	9
LINS	ENSG00000140471	15	0	0
LINS1	ENSG00000140471	15	DisGenNet;HPO;IPA;Ilyas_M_(2020)_F1000Res;OMIM-2022-12-09;Opentarget_genetic_association;Opentarget_textMining;Orphanet;Radboudumc_:_Exome_panels;SysID_primary_ID_genes	10
LIPA	ENSG00000107798	10	DisGenNet;HPO;Phenolyser	3
LIPT1	ENSG00000144182	2	DDG2P;DisGenNet;HPO;Phenolyser	4
LIPT2	ENSG00000175536	11	DisGenNet;HPO;Phenolyser	3
LMAN2L	ENSG00000114988	2	DisGenNet;HPO;IPA;OMIM-2022-12-09;Opentarget_genetic_association;Opentarget_textMining;Orphanet;Phenolyser;Radboudumc_:_Exome_panels;SysID_candidate_ID_genes	10
LMBR1	ENSG00000105983	7	DisGenNet;HPO;Phenolyser	3
LMBRD1	ENSG00000168216	6	Fulgent_:_gene_panel;HPO;IPA;Ilyas_M_(2020)_F1000Res;Opentarget_textMining;Phenolyser;SysID_primary_ID_genes	7
LMBRD2	ENSG00000164187	5	DDG2P;HPO;Opentarget_genetic_association;Opentarget_textMining;Orphanet;Radboudumc_:_Exome_panels;SysID_primary_ID_genes	7
LMNA	ENSG00000160789	1	HPO;Ilyas_M_(2020)_F1000Res;Phenolyser;SysID_candidate_ID_genes	4
LMNB1	ENSG00000113368	5	DisGenNet;Phenolyser;Radboudumc_:_Exome_panels;SysID_primary_ID_genes	4
LMNB2	ENSG00000176619	19	DisGenNet;HPO;Phenolyser;Radboudumc_:_Exome_panels;SysID_primary_ID_genes	5
LNPK	ENSG00000144320	2	DisGenNet;Opentarget_genetic_association;SysID_primary_ID_genes	3
LONP1	ENSG00000196365	19	DisGenNet;HPO;Ilyas_M_(2020)_F1000Res;Opentarget_genetic_association;Radboudumc_:_Exome_panels;SysID_primary_ID_genes	6
LRAT	ENSG00000121207	4	DisGenNet;HPO;Phenolyser	3
LRP2	ENSG00000081479	2	DDG2P;DisGenNet;HPO;IPA;Ilyas_M_(2020)_F1000Res;Vissers_LE_(2016)_Nat_Rev_Genet;Opentarget_genetic_association;Opentarget_textMining;Phenolyser;Radboudumc_:_Exome_panels;SysID_primary_ID_genes	11
LRP5	ENSG00000162337	11	DDG2P;DisGenNet;HPO;Ilyas_M_(2020)_F1000Res;Phenolyser	5
LRPPRC	ENSG00000138095	2	Ilyas_M_(2020)_F1000Res;Vissers_LE_(2016)_Nat_Rev_Genet;Opentarget_genetic_association;Radboudumc_:_Exome_panels;SysID_primary_ID_genes	5
LRRC32	ENSG00000137507	11	DisGenNet;HPO;Opentarget_genetic_association	3
LRRC7	ENSG00000033122	1	IPA;Opentarget_genetic_association;SysID_candidate_ID_genes	3
LSS	ENSG00000160285	21	DisGenNet;HPO;IPA;OMIM-2022-12-09;Opentarget_genetic_association;Opentarget_textMining;Orphanet;Radboudumc_:_Exome_panels;SysID_primary_ID_genes	9
LTBP1	ENSG00000049323	2	HPO;Opentarget_textMining;SysID_primary_ID_genes	3
LTBP2	ENSG00000119681	14	DisGenNet;HPO;Ilyas_M_(2020)_F1000Res;Phenolyser	4
LTBP4	ENSG00000090006	19	DisGenNet;HPO;Phenolyser	3
LTC4S	ENSG00000213316	5	DisGenNet;HPO;Phenolyser	3
LYRM7	ENSG00000186687	5	DisGenNet;HPO;Phenolyser;Radboudumc_:_Exome_panels;SysID_primary_ID_genes	5
LYST	ENSG00000143669	1	DDG2P;DisGenNet;Fulgent_:_gene_panel;HPO;Phenolyser;Radboudumc_:_Exome_panels;SysID_candidate_ID_genes	7
LZTFL1	ENSG00000163818	3	DisGenNet;HPO;Ilyas_M_(2020)_F1000Res;Phenolyser;Radboudumc_:_Exome_panels;SysID_primary_ID_genes	6
LZTR1	ENSG00000099949	22	DDG2P;DisGenNet;HPO;IPA;Opentarget_textMining;Radboudumc_:_Exome_panels;SysID_primary_ID_genes	7
MAB21L1	ENSG00000180660	13	DDG2P;DisGenNet;IPA;Opentarget_genetic_association;Opentarget_textMining;Radboudumc_:_Exome_panels;SysID_primary_ID_genes	7
MAB21L2	ENSG00000181541	4	DisGenNet;HPO;Ilyas_M_(2020)_F1000Res;Opentarget_textMining;Phenolyser;Radboudumc_:_Exome_panels;SysID_primary_ID_genes	7
MACF1	ENSG00000127603	1	DisGenNet;Fulgent_:_gene_panel;IPA;Opentarget_genetic_association;Radboudumc_:_Exome_panels;SysID_primary_ID_genes	6
MACROD2	ENSG00000172264	20	DisGenNet;Opentarget_textMining;Phenolyser;SysID_candidate_ID_genes	4
MAD2L2	ENSG00000116670	1	DisGenNet;HPO;Phenolyser	3
MADD	ENSG00000110514	11	DisGenNet;HPO;IPA;Orphanet;Radboudumc_:_Exome_panels;SysID_primary_ID_genes	6
MAF	ENSG00000178573	16	DisGenNet;HPO;IPA;Ilyas_M_(2020)_F1000Res;Opentarget_genetic_association;Opentarget_textMining;Phenolyser;Radboudumc_:_Exome_panels;SysID_primary_ID_genes	9
MAFB	ENSG00000204103	20	DisGenNet;HPO;Phenolyser	3
MAG	ENSG00000105695	19	DisGenNet;HPO;Phenolyser;Radboudumc_:_Exome_panels;SysID_primary_ID_genes	5
MAGED2	ENSG00000102316	X	DisGenNet;Opentarget_textMining;SysID_candidate_ID_genes	3
MAGEL2	ENSG00000254585	15	DisGenNet;Fulgent_:_gene_panel;HPO;IPA;Ilyas_M_(2020)_F1000Res;Vissers_LE_(2016)_Nat_Rev_Genet;Opentarget_genetic_association;Opentarget_textMining;Phenolyser;Radboudumc_:_Exome_panels;SysID_primary_ID_genes	11
MAGT1	ENSG00000102158	X	DDG2P;DisGenNet;Fulgent_:_gene_panel;HPO;Vissers_LE_(2016)_Nat_Rev_Genet;Opentarget_textMining;Phenolyser;SysID_candidate_ID_genes	8
MAK	ENSG00000111837	6	DisGenNet;HPO;IPA;Phenolyser	4
MAN1B1	ENSG00000177239	9	DDG2P;DisGenNet;Fulgent_:_gene_panel;HPO;IPA;Ilyas_M_(2020)_F1000Res;Vissers_LE_(2016)_Nat_Rev_Genet;Opentarget_genetic_association;Opentarget_textMining;Orphanet;Phenolyser;Radboudumc_:_Exome_panels;SysID_primary_ID_genes	13
MAN2B1	ENSG00000104774	19	DDG2P;DisGenNet;Fulgent_:_gene_panel;HPO;IPA;Ilyas_M_(2020)_F1000Res;Vissers_LE_(2016)_Nat_Rev_Genet;Opentarget_genetic_association;Opentarget_textMining;Phenolyser;Radboudumc_:_Exome_panels;SysID_primary_ID_genes	12
MAN2C1	ENSG00000140400	15	DisGenNet;HPO;Opentarget_textMining;Orphanet	4
MANBA	ENSG00000109323	4	DDG2P;DisGenNet;Fulgent_:_gene_panel;HPO;Ilyas_M_(2020)_F1000Res;Vissers_LE_(2016)_Nat_Rev_Genet;Opentarget_genetic_association;Opentarget_textMining;Phenolyser;Radboudumc_:_Exome_panels;SysID_primary_ID_genes	11
MAOA	ENSG00000189221	X	DisGenNet;Fulgent_:_gene_panel;HPO;IPA;Ilyas_M_(2020)_F1000Res;Vissers_LE_(2016)_Nat_Rev_Genet;Opentarget_genetic_association;Opentarget_textMining;Phenolyser;Radboudumc_:_Exome_panels;SysID_primary_ID_genes	11
MAP1B	ENSG00000131711	5	DisGenNet;HPO;Opentarget_textMining;Radboudumc_:_Exome_panels;SysID_primary_ID_genes	5
MAP2K1	ENSG00000169032	15	DDG2P;DisGenNet;HPO;IPA;Coe_B.P_(2019)_Nat_Genet;Ilyas_M_(2020)_F1000Res;Vissers_LE_(2016)_Nat_Rev_Genet;Opentarget_textMining;Phenolyser;Radboudumc_:_Exome_panels;SysID_primary_ID_genes	11
MAP2K2	ENSG00000126934	19	DDG2P;DisGenNet;HPO;Ilyas_M_(2020)_F1000Res;Vissers_LE_(2016)_Nat_Rev_Genet;Opentarget_textMining;Phenolyser;Radboudumc_:_Exome_panels;SysID_primary_ID_genes	9
MAP3K7	ENSG00000135341	6	HPO;Phenolyser;SysID_primary_ID_genes	3
MAPK1	ENSG00000100030	22	DisGenNet;HPO;Opentarget_genetic_association;Opentarget_textMining;Phenolyser;Radboudumc_:_Exome_panels;SysID_primary_ID_genes	7
MAPK10	ENSG00000109339	4	DDG2P;DisGenNet;HPO;Ilyas_M_(2020)_F1000Res;Opentarget_textMining;Phenolyser;SysID_candidate_ID_genes	7
MAPK3	ENSG00000102882	16	DisGenNet;Opentarget_textMining;SysID_candidate_ID_genes	3
MAPK8IP3	ENSG00000138834	16	DDG2P;DisGenNet;Fulgent_:_gene_panel;HPO;Opentarget_genetic_association;Opentarget_textMining;Orphanet;Radboudumc_:_Exome_panels;SysID_primary_ID_genes	9
MAPRE2	ENSG00000166974	18	DisGenNet;HPO;Ilyas_M_(2020)_F1000Res;Opentarget_textMining;Phenolyser;Radboudumc_:_Exome_panels;SysID_candidate_ID_genes	7
2023-03-01	ENSG00000166986	12	DisGenNet;HPO;SysID_candidate_ID_genes	3
2023-03-02	ENSG00000247626	2	DisGenNet;HPO;Phenolyser;SysID_candidate_ID_genes	4
MASP1	ENSG00000127241	3	DDG2P;DisGenNet;HPO;Ilyas_M_(2020)_F1000Res;Opentarget_textMining;Phenolyser;Radboudumc_:_Exome_panels;SysID_primary_ID_genes	8
MAST1	ENSG00000105613	19	DisGenNet;Opentarget_genetic_association;Radboudumc_:_Exome_panels;SysID_primary_ID_genes	4
MAT1A	ENSG00000151224	10	DDG2P;Fulgent_:_gene_panel;HPO;Ilyas_M_(2020)_F1000Res;Vissers_LE_(2016)_Nat_Rev_Genet;Phenolyser;Radboudumc_:_Exome_panels;SysID_primary_ID_genes	8
MBD5	ENSG00000204406	2	DDG2P;DisGenNet;Fulgent_:_gene_panel;HPO;IPA;Coe_B.P_(2019)_Nat_Genet;Ilyas_M_(2020)_F1000Res;Mireia_Coll-TanÃ©_(2019)_Dis_Model_Mech;Vissers_LE_(2016)_Nat_Rev_Genet;OMIM-2022-12-09;Opentarget_genetic_association;Opentarget_textMining;Orphanet;Phenolyser;Radboudumc_:_Exome_panels;SysID_primary_ID_genes	16
MBOAT7	ENSG00000125505	19	AutDB;DDG2P;DisGenNet;HPO;IPA;Ilyas_M_(2020)_F1000Res;OMIM-2022-12-09;Opentarget_genetic_association;Opentarget_textMining;Orphanet;Phenolyser;Radboudumc_:_Exome_panels;SysID_primary_ID_genes	13
MBTPS2	ENSG00000012174	X	DisGenNet;Fulgent_:_gene_panel;HPO;Ilyas_M_(2020)_F1000Res;Vissers_LE_(2016)_Nat_Rev_Genet;Opentarget_textMining;Phenolyser;Radboudumc_:_Exome_panels;SysID_primary_ID_genes	9
MC2R	ENSG00000185231	18	DisGenNet;HPO;Ilyas_M_(2020)_F1000Res	3
MCCC1	ENSG00000078070	3	DDG2P;DisGenNet;Fulgent_:_gene_panel;HPO;Ilyas_M_(2020)_F1000Res;Vissers_LE_(2016)_Nat_Rev_Genet;Phenolyser;Radboudumc_:_Exome_panels;SysID_candidate_ID_genes	9
MCCC2	ENSG00000131844	5	DisGenNet;Fulgent_:_gene_panel;HPO;Ilyas_M_(2020)_F1000Res;Vissers_LE_(2016)_Nat_Rev_Genet;Phenolyser;Radboudumc_:_Exome_panels;SysID_primary_ID_genes	8
MCM3AP	ENSG00000160294	21	DisGenNet;HPO;IPA;OMIM-2022-12-09;Opentarget_textMining;SysID_primary_ID_genes	6
MCM4	ENSG00000104738	8	DisGenNet;HPO;Phenolyser	3
MCOLN1	ENSG00000090674	19	DDG2P;DisGenNet;Fulgent_:_gene_panel;HPO;Ilyas_M_(2020)_F1000Res;Vissers_LE_(2016)_Nat_Rev_Genet;Opentarget_genetic_association;Opentarget_textMining;Phenolyser;Radboudumc_:_Exome_panels;SysID_primary_ID_genes	11
MCPH1	ENSG00000147316	8	DDG2P;DisGenNet;Fulgent_:_gene_panel;HPO;IPA;Ilyas_M_(2020)_F1000Res;Vissers_LE_(2016)_Nat_Rev_Genet;Opentarget_genetic_association;Opentarget_textMining;Phenolyser;Radboudumc_:_Exome_panels;SysID_primary_ID_genes	12
MCTP2	ENSG00000140563	15	DisGenNet;HPO;Phenolyser	3
MDH2	ENSG00000146701	7	DDG2P;DisGenNet;HPO;Phenolyser	4
MECP2	ENSG00000169057	X	AutDB;DDG2P;DisGenNet;Fulgent_:_gene_panel;HPO;IPA;Coe_B.P_(2019)_Nat_Genet;Ilyas_M_(2020)_F1000Res;Vissers_LE_(2016)_Nat_Rev_Genet;OMIM-2022-12-09;Opentarget_genetic_association;Opentarget_textMining;Orphanet;Phenolyser;Radboudumc_:_Exome_panels;SysID_primary_ID_genes	16
MED12	ENSG00000184634	X	DDG2P;DisGenNet;Fulgent_:_gene_panel;HPO;IPA;Coe_B.P_(2019)_Nat_Genet;Ilyas_M_(2020)_F1000Res;Vissers_LE_(2016)_Nat_Rev_Genet;Opentarget_genetic_association;Opentarget_textMining;Orphanet;Phenolyser;Radboudumc_:_Exome_panels;SysID_primary_ID_genes	14
MED12L	ENSG00000144893	3	DisGenNet;HPO;IPA;Opentarget_genetic_association;Opentarget_textMining;Orphanet;Radboudumc_:_Exome_panels;SysID_primary_ID_genes	8
MED13	ENSG00000108510	17	DDG2P;DisGenNet;HPO;IPA;OMIM-2022-12-09;Opentarget_genetic_association;Opentarget_textMining;Orphanet;Radboudumc_:_Exome_panels;SysID_primary_ID_genes	10
MED13L	ENSG00000123066	12	AutDB;DDG2P;DisGenNet;Fulgent_:_gene_panel;HPO;IPA;Coe_B.P_(2019)_Nat_Genet;Ilyas_M_(2020)_F1000Res;Vissers_LE_(2016)_Nat_Rev_Genet;OMIM-2022-12-09;Opentarget_genetic_association;Opentarget_textMining;Phenolyser;Radboudumc_:_Exome_panels;SysID_primary_ID_genes	15
MED17	ENSG00000042429	11	DisGenNet;Fulgent_:_gene_panel;IPA;Ilyas_M_(2020)_F1000Res;Vissers_LE_(2016)_Nat_Rev_Genet;Opentarget_genetic_association;Opentarget_textMining;Radboudumc_:_Exome_panels;SysID_primary_ID_genes	9
MED23	ENSG00000112282	6	DisGenNet;Fulgent_:_gene_panel;HPO;IPA;Ilyas_M_(2020)_F1000Res;Vissers_LE_(2016)_Nat_Rev_Genet;OMIM-2022-12-09;Opentarget_genetic_association;Opentarget_textMining;Orphanet;Phenolyser;Radboudumc_:_Exome_panels;SysID_primary_ID_genes	13
MED25	ENSG00000104973	19	DisGenNet;HPO;IPA;Ilyas_M_(2020)_F1000Res;Orphanet;Radboudumc_:_Exome_panels;SysID_primary_ID_genes	7
MED27	ENSG00000160563	9	HPO;IPA;Opentarget_genetic_association;Orphanet;Radboudumc_:_Exome_panels;SysID_primary_ID_genes	6
MEF2C	ENSG00000081189	5	AutDB;DDG2P;DisGenNet;Fulgent_:_gene_panel;HPO;IPA;Coe_B.P_(2019)_Nat_Genet;Ilyas_M_(2020)_F1000Res;Vissers_LE_(2016)_Nat_Rev_Genet;Opentarget_genetic_association;Opentarget_textMining;Phenolyser;Radboudumc_:_Exome_panels;SysID_primary_ID_genes	14
MEGF8	ENSG00000105429	19	DDG2P;DisGenNet;HPO;Ilyas_M_(2020)_F1000Res;Opentarget_textMining;Phenolyser;Radboudumc_:_Exome_panels;SysID_primary_ID_genes	8
MEIS2	ENSG00000134138	15	DisGenNet;HPO;IPA;Coe_B.P_(2019)_Nat_Genet;OMIM-2022-12-09;Opentarget_textMining;Phenolyser;Radboudumc_:_Exome_panels;SysID_primary_ID_genes	9
MERTK	ENSG00000153208	2	DisGenNet;HPO;Phenolyser	3
MESP2	ENSG00000188095	15	DisGenNet;HPO;Ilyas_M_(2020)_F1000Res;Phenolyser	4
METAP1	ENSG00000164024	4	Opentarget_genetic_association;Opentarget_textMining;SysID_candidate_ID_genes	3
METTL23	ENSG00000181038	17	DDG2P;DisGenNet;HPO;IPA;Vissers_LE_(2016)_Nat_Rev_Genet;OMIM-2022-12-09;Opentarget_genetic_association;Opentarget_textMining;Orphanet;Phenolyser;Radboudumc_:_Exome_panels;SysID_primary_ID_genes	12
METTL5	ENSG00000138382	2	DDG2P;DisGenNet;HPO;IPA;OMIM-2022-12-09;Opentarget_genetic_association;Opentarget_textMining;Radboudumc_:_Exome_panels;SysID_primary_ID_genes	9
MFF	ENSG00000168958	2	DisGenNet;HPO;Opentarget_genetic_association;Opentarget_textMining;Phenolyser	5
MFN2	ENSG00000116688	1	DisGenNet;Opentarget_textMining;SysID_candidate_ID_genes	3
MFSD2A	ENSG00000168389	1	DisGenNet;HPO;Ilyas_M_(2020)_F1000Res;Opentarget_genetic_association;Opentarget_textMining;Phenolyser;Radboudumc_:_Exome_panels;SysID_primary_ID_genes	8
MFSD8	ENSG00000164073	4	Fulgent_:_gene_panel;Ilyas_M_(2020)_F1000Res;Opentarget_genetic_association;Phenolyser;Radboudumc_:_Exome_panels;SysID_candidate_ID_genes	6
MGAT2	ENSG00000168282	14	DDG2P;DisGenNet;Fulgent_:_gene_panel;HPO;Ilyas_M_(2020)_F1000Res;Vissers_LE_(2016)_Nat_Rev_Genet;Phenolyser;Radboudumc_:_Exome_panels;SysID_primary_ID_genes	9
MGME1	ENSG00000125871	20	DisGenNet;HPO;Ilyas_M_(2020)_F1000Res;Phenolyser;SysID_primary_ID_genes	5
MGP	ENSG00000111341	12	DDG2P;DisGenNet;HPO;Ilyas_M_(2020)_F1000Res;Phenolyser;Radboudumc_:_Exome_panels;SysID_candidate_ID_genes	7
MIA3	ENSG00000154305	1	HPO;Opentarget_textMining;Radboudumc_:_Exome_panels;SysID_candidate_ID_genes	4
MICOS13	ENSG00000174917	19	DisGenNet;HPO;SysID_primary_ID_genes	3
MICU1	ENSG00000107745	10	DisGenNet;HPO;Opentarget_textMining;Phenolyser	4
MID1	ENSG00000101871	X	DisGenNet;Fulgent_:_gene_panel;HPO;Ilyas_M_(2020)_F1000Res;Vissers_LE_(2016)_Nat_Rev_Genet;Opentarget_textMining;Phenolyser;Radboudumc_:_Exome_panels;SysID_primary_ID_genes	9
MID2	ENSG00000080561	X	DisGenNet;HPO;IPA;OMIM-2022-12-09;Opentarget_textMining;Orphanet;Phenolyser;Radboudumc_:_Exome_panels;SysID_candidate_ID_genes	9
MINPP1	ENSG00000107789	10	HPO;Radboudumc_:_Exome_panels;SysID_primary_ID_genes	3
MIPEP	ENSG00000027001	13	DisGenNet;HPO;Opentarget_textMining;Phenolyser	4
MIR137	ENSG00000284202	1	DisGenNet;Opentarget_textMining;SysID_candidate_ID_genes	3
MIR17HG	ENSG00000215417	13	DDG2P;DisGenNet;HPO;Ilyas_M_(2020)_F1000Res;Opentarget_genetic_association;Phenolyser;SysID_primary_ID_genes	7
MITF	ENSG00000187098	3	DisGenNet;IPA;Opentarget_genetic_association	3
MKKS	ENSG00000125863	20	DDG2P;DisGenNet;Fulgent_:_gene_panel;HPO;Ilyas_M_(2020)_F1000Res;Vissers_LE_(2016)_Nat_Rev_Genet;Opentarget_textMining;Phenolyser;Radboudumc_:_Exome_panels;SysID_primary_ID_genes	10
MKRN3	ENSG00000179455	15	DisGenNet;HPO;Opentarget_textMining;Phenolyser	4
MKRN3-AS1	0	0	DisGenNet;HPO;Phenolyser	3
MKS1	ENSG00000011143	17	DDG2P;DisGenNet;HPO;Ilyas_M_(2020)_F1000Res;Opentarget_textMining;Phenolyser;Radboudumc_:_Exome_panels;SysID_candidate_ID_genes	8
MLC1	ENSG00000100427	22	DDG2P;DisGenNet;HPO;Ilyas_M_(2020)_F1000Res;Phenolyser;Radboudumc_:_Exome_panels;SysID_primary_ID_genes	7
MLLT1	ENSG00000130382	19	DisGenNet;Opentarget_genetic_association;Opentarget_textMining	3
MLXIPL	ENSG00000009950	7	DisGenNet;HPO;Phenolyser	3
MLYCD	ENSG00000103150	16	DisGenNet;HPO;IPA;Ilyas_M_(2020)_F1000Res;Vissers_LE_(2016)_Nat_Rev_Genet;Opentarget_genetic_association;Radboudumc_:_Exome_panels;SysID_primary_ID_genes	8
MMAA	ENSG00000151611	4	DDG2P;DisGenNet;HPO;Opentarget_genetic_association;Phenolyser	5
MMAB	ENSG00000139428	12	DDG2P;DisGenNet;HPO;Phenolyser	4
MMACHC	ENSG00000132763	1	DDG2P;DisGenNet;HPO;Ilyas_M_(2020)_F1000Res;Vissers_LE_(2016)_Nat_Rev_Genet;Phenolyser;Radboudumc_:_Exome_panels;SysID_primary_ID_genes	8
MMADHC	ENSG00000168288	2	DDG2P;DisGenNet;Fulgent_:_gene_panel;HPO;Ilyas_M_(2020)_F1000Res;Vissers_LE_(2016)_Nat_Rev_Genet;Phenolyser;Radboudumc_:_Exome_panels;SysID_primary_ID_genes	9
MMUT	ENSG00000146085	6	DisGenNet;HPO;Radboudumc_:_Exome_panels;SysID_primary_ID_genes	4
MN1	ENSG00000169184	22	DDG2P;DisGenNet;HPO;IPA;Coe_B.P_(2019)_Nat_Genet;Opentarget_textMining;Radboudumc_:_Exome_panels;SysID_primary_ID_genes	8
MNX1	ENSG00000130675	7	DDG2P;DisGenNet;HPO;Phenolyser	4
MOCS1	ENSG00000124615	6	DisGenNet;HPO;Ilyas_M_(2020)_F1000Res;Vissers_LE_(2016)_Nat_Rev_Genet;Opentarget_genetic_association;Phenolyser;Radboudumc_:_Exome_panels;SysID_primary_ID_genes	8
MOCS2	ENSG00000164172	5	DDG2P;Fulgent_:_gene_panel;Ilyas_M_(2020)_F1000Res;Vissers_LE_(2016)_Nat_Rev_Genet;Radboudumc_:_Exome_panels;SysID_primary_ID_genes	6
MOGS	ENSG00000115275	2	Ilyas_M_(2020)_F1000Res;Vissers_LE_(2016)_Nat_Rev_Genet;Phenolyser;Radboudumc_:_Exome_panels;SysID_primary_ID_genes	5
MORC2	ENSG00000133422	22	HPO;IPA;Coe_B.P_(2019)_Nat_Genet;Opentarget_genetic_association;Radboudumc_:_Exome_panels;SysID_primary_ID_genes	6
MPC1	ENSG00000060762	6	DisGenNet;HPO;Phenolyser	3
MPDU1	ENSG00000129255	17	HPO;Ilyas_M_(2020)_F1000Res;Vissers_LE_(2016)_Nat_Rev_Genet;Phenolyser;Radboudumc_:_Exome_panels;SysID_primary_ID_genes	6
MPDZ	ENSG00000107186	9	DisGenNet;HPO;Ilyas_M_(2020)_F1000Res;Vissers_LE_(2016)_Nat_Rev_Genet;Phenolyser;Radboudumc_:_Exome_panels;SysID_primary_ID_genes	7
MPI	ENSG00000178802	15	Ilyas_M_(2020)_F1000Res;Phenolyser;SysID_candidate_ID_genes	3
MPLKIP	ENSG00000168303	7	DDG2P;DisGenNet;HPO;IPA;Ilyas_M_(2020)_F1000Res;Opentarget_textMining;Phenolyser;Radboudumc_:_Exome_panels;SysID_primary_ID_genes	9
MPV17	ENSG00000115204	2	DDG2P;DisGenNet;HPO;Opentarget_textMining;Phenolyser	5
MPZ	ENSG00000158887	1	DisGenNet;IPA;Opentarget_genetic_association;Opentarget_textMining;Phenolyser	5
MRAP	ENSG00000170262	21	DisGenNet;Fulgent_:_gene_panel;HPO	3
MRE11	ENSG00000020922	11	DisGenNet;Opentarget_textMining;SysID_primary_ID_genes	3
MRPL3	ENSG00000114686	3	DisGenNet;HPO;Phenolyser	3
MRPS2	ENSG00000122140	9	DisGenNet;HPO;Phenolyser;SysID_candidate_ID_genes	4
MRPS22	ENSG00000175110	3	Ilyas_M_(2020)_F1000Res;Vissers_LE_(2016)_Nat_Rev_Genet;Radboudumc_:_Exome_panels;SysID_primary_ID_genes	4
MRPS34	ENSG00000074071	16	DDG2P;DisGenNet;HPO;Phenolyser	4
MRT4	0	0	DisGenNet;OMIM-2022-12-09;Phenolyser	3
MRX73	0	0	DisGenNet;OMIM-2022-12-09;Phenolyser	3
MRX81	0	0	DisGenNet;OMIM-2022-12-09;Phenolyser	3
MRX82	0	0	DisGenNet;OMIM-2022-12-09;Phenolyser	3
MSL2	ENSG00000174579	3	IPA;Radboudumc_:_Exome_panels;SysID_candidate_ID_genes	3
MSL3	ENSG00000005302	X	DDG2P;DisGenNet;HPO;IPA;Coe_B.P_(2019)_Nat_Genet;Ilyas_M_(2020)_F1000Res;Opentarget_genetic_association;Radboudumc_:_Exome_panels;SysID_primary_ID_genes	9
MSMO1	ENSG00000052802	4	DisGenNet;HPO;Ilyas_M_(2020)_F1000Res;Phenolyser;Radboudumc_:_Exome_panels;SysID_candidate_ID_genes	6
MSTO1	ENSG00000125459	1	DisGenNet;HPO;Opentarget_textMining;Phenolyser;SysID_primary_ID_genes	5
MTF1	ENSG00000188786	1	DDG2P;DisGenNet;Opentarget_genetic_association;SysID_candidate_ID_genes	4
MTFMT	ENSG00000103707	15	DisGenNet;Fulgent_:_gene_panel;HPO;Phenolyser;Radboudumc_:_Exome_panels;SysID_primary_ID_genes	6
MTHFD1	ENSG00000100714	14	DisGenNet;HPO;Phenolyser	3
MTHFR	ENSG00000177000	1	DisGenNet;Fulgent_:_gene_panel;HPO;Ilyas_M_(2020)_F1000Res;Vissers_LE_(2016)_Nat_Rev_Genet;Opentarget_genetic_association;Opentarget_textMining;Phenolyser;Radboudumc_:_Exome_panels;SysID_candidate_ID_genes	10
MTHFS	ENSG00000136371	15	Phenolyser;Radboudumc_:_Exome_panels;SysID_candidate_ID_genes	3
MTO1	ENSG00000135297	6	IPA;Ilyas_M_(2020)_F1000Res;Opentarget_textMining;Radboudumc_:_Exome_panels;SysID_primary_ID_genes	5
MTOR	ENSG00000198793	1	DDG2P;DisGenNet;Fulgent_:_gene_panel;HPO;IPA;Ilyas_M_(2020)_F1000Res;Opentarget_genetic_association;Opentarget_textMining;Orphanet;Phenolyser;Radboudumc_:_Exome_panels;SysID_primary_ID_genes	12
MTR	ENSG00000116984	1	DDG2P;DisGenNet;Fulgent_:_gene_panel;HPO;IPA;Ilyas_M_(2020)_F1000Res;Vissers_LE_(2016)_Nat_Rev_Genet;Opentarget_genetic_association;Phenolyser;Radboudumc_:_Exome_panels;SysID_primary_ID_genes	11
MTRFR	ENSG00000130921	12	DDG2P;HPO;Opentarget_textMining;Radboudumc_:_Exome_panels;SysID_primary_ID_genes	5
MTRR	ENSG00000124275	5	DDG2P;DisGenNet;HPO;Ilyas_M_(2020)_F1000Res;Vissers_LE_(2016)_Nat_Rev_Genet;Phenolyser;Radboudumc_:_Exome_panels;SysID_primary_ID_genes	8
MTSS2	ENSG00000132613	16	DDG2P;OMIM-2022-12-09;Opentarget_genetic_association;SysID_candidate_ID_genes	4
MUT	ENSG00000146085	6	0	0
MVK	ENSG00000110921	12	DisGenNet;HPO;Ilyas_M_(2020)_F1000Res;Vissers_LE_(2016)_Nat_Rev_Genet;Phenolyser;Radboudumc_:_Exome_panels;SysID_primary_ID_genes	7
MYCN	ENSG00000134323	2	DDG2P;DisGenNet;Fulgent_:_gene_panel;HPO;Ilyas_M_(2020)_F1000Res;Vissers_LE_(2016)_Nat_Rev_Genet;Opentarget_genetic_association;Opentarget_textMining;Phenolyser;Radboudumc_:_Exome_panels;SysID_primary_ID_genes	11
MYH3	ENSG00000109063	17	DDG2P;HPO;Phenolyser	3
MYH7	ENSG00000092054	14	DisGenNet;HPO;Phenolyser	3
MYH9	ENSG00000100345	22	Ilyas_M_(2020)_F1000Res;Vissers_LE_(2016)_Nat_Rev_Genet;Radboudumc_:_Exome_panels	3
MYO5A	ENSG00000197535	15	DDG2P;DisGenNet;Fulgent_:_gene_panel;HPO;Ilyas_M_(2020)_F1000Res;Vissers_LE_(2016)_Nat_Rev_Genet;Opentarget_genetic_association;Opentarget_textMining;Phenolyser;Radboudumc_:_Exome_panels;SysID_primary_ID_genes	11
MYO5B	ENSG00000167306	18	DisGenNet;HPO;Phenolyser	3
MYO7A	ENSG00000137474	11	DisGenNet;HPO;Opentarget_genetic_association;Phenolyser	4
MYO9A	ENSG00000066933	15	DisGenNet;HPO;Phenolyser;Radboudumc_:_Exome_panels	4
MYT1	ENSG00000196132	20	DisGenNet;IPA;Opentarget_genetic_association	3
MYT1L	ENSG00000186487	2	AutDB;DisGenNet;Fulgent_:_gene_panel;HPO;IPA;Coe_B.P_(2019)_Nat_Genet;Ilyas_M_(2020)_F1000Res;Vissers_LE_(2016)_Nat_Rev_Genet;OMIM-2022-12-09;Opentarget_genetic_association;Opentarget_textMining;Orphanet;Phenolyser;Radboudumc_:_Exome_panels;SysID_primary_ID_genes	15
NAA10	ENSG00000102030	X	DisGenNet;Fulgent_:_gene_panel;HPO;IPA;Coe_B.P_(2019)_Nat_Genet;Ilyas_M_(2020)_F1000Res;Vissers_LE_(2016)_Nat_Rev_Genet;Opentarget_genetic_association;Opentarget_textMining;Phenolyser;Radboudumc_:_Exome_panels;SysID_primary_ID_genes	12
NAA15	ENSG00000164134	4	DDG2P;DisGenNet;HPO;IPA;Coe_B.P_(2019)_Nat_Genet;Ilyas_M_(2020)_F1000Res;OMIM-2022-12-09;Opentarget_genetic_association;Opentarget_textMining;Phenolyser;Radboudumc_:_Exome_panels;SysID_primary_ID_genes	12
NAA20	ENSG00000173418	20	HPO;OMIM-2022-12-09;Orphanet;Radboudumc_:_Exome_panels;SysID_primary_ID_genes	5
NACC1	ENSG00000160877	19	DDG2P;DisGenNet;HPO;IPA;Ilyas_M_(2020)_F1000Res;Opentarget_genetic_association;Phenolyser;Radboudumc_:_Exome_panels;SysID_primary_ID_genes	9
NADK2	ENSG00000152620	5	DisGenNet;HPO;Phenolyser	3
NAGA	ENSG00000198951	22	DDG2P;DisGenNet;Fulgent_:_gene_panel;HPO;Ilyas_M_(2020)_F1000Res;Vissers_LE_(2016)_Nat_Rev_Genet;Phenolyser;Radboudumc_:_Exome_panels;SysID_primary_ID_genes	9
NAGLU	ENSG00000108784	17	DDG2P;DisGenNet;HPO;IPA;Ilyas_M_(2020)_F1000Res;Vissers_LE_(2016)_Nat_Rev_Genet;Opentarget_genetic_association;Phenolyser;Radboudumc_:_Exome_panels;SysID_primary_ID_genes	10
NALCN	ENSG00000102452	13	DisGenNet;Fulgent_:_gene_panel;HPO;IPA;Ilyas_M_(2020)_F1000Res;Vissers_LE_(2016)_Nat_Rev_Genet;Opentarget_genetic_association;Opentarget_textMining;Radboudumc_:_Exome_panels;SysID_primary_ID_genes	10
NANS	ENSG00000095380	9	DDG2P;DisGenNet;HPO;IPA;Ilyas_M_(2020)_F1000Res;Phenolyser;Radboudumc_:_Exome_panels;SysID_primary_ID_genes	8
NARS1	ENSG00000134440	18	HPO;IPA;Radboudumc_:_Exome_panels;SysID_primary_ID_genes	4
NARS2	ENSG00000137513	11	HPO;Opentarget_textMining;Phenolyser;Radboudumc_:_Exome_panels;SysID_primary_ID_genes	5
NAT8L	ENSG00000185818	4	DisGenNet;HPO;Phenolyser	3
NBAS	ENSG00000151779	2	DisGenNet;Opentarget_genetic_association;Opentarget_textMining	3
NBEA	ENSG00000172915	13	DDG2P;DisGenNet;HPO;IPA;Mireia_Coll-TanÃ©_(2019)_Dis_Model_Mech;Opentarget_genetic_association;Orphanet;Radboudumc_:_Exome_panels;SysID_primary_ID_genes	9
NBN	ENSG00000104320	8	DDG2P;DisGenNet;Fulgent_:_gene_panel;HPO;Ilyas_M_(2020)_F1000Res;Vissers_LE_(2016)_Nat_Rev_Genet;Opentarget_textMining;Phenolyser;Radboudumc_:_Exome_panels;SysID_primary_ID_genes	10
NCAPD2	ENSG00000010292	12	DisGenNet;HPO;Phenolyser;SysID_candidate_ID_genes	4
NCAPD3	ENSG00000151503	11	DisGenNet;HPO;Opentarget_genetic_association;Phenolyser;SysID_candidate_ID_genes	5
NCAPG2	ENSG00000146918	7	Opentarget_textMining;Radboudumc_:_Exome_panels;SysID_primary_ID_genes	3
NCAPH	ENSG00000121152	2	DisGenNet;HPO;SysID_candidate_ID_genes	3
NCDN	ENSG00000020129	1	HPO;Opentarget_genetic_association;Orphanet;Radboudumc_:_Exome_panels;SysID_primary_ID_genes	5
NCKAP1	ENSG00000061676	2	DisGenNet;Opentarget_genetic_association;Opentarget_textMining;Radboudumc_:_Exome_panels;SysID_primary_ID_genes	5
NCOR1	ENSG00000141027	17	Opentarget_genetic_association;Opentarget_textMining;SysID_primary_ID_genes	3
ND3	ENSG00000198840	MT	0	0
ND5	ENSG00000198786	MT	0	0
ND6	ENSG00000198695	MT	0	0
NDE1	ENSG00000072864	16	DDG2P;DisGenNet;HPO;IPA;Ilyas_M_(2020)_F1000Res;Vissers_LE_(2016)_Nat_Rev_Genet;Opentarget_genetic_association;Opentarget_textMining;Phenolyser;Radboudumc_:_Exome_panels;SysID_primary_ID_genes	11
NDN	ENSG00000182636	15	DisGenNet;HPO;Opentarget_textMining;Phenolyser	4
NDP	ENSG00000124479	X	DDG2P;DisGenNet;Fulgent_:_gene_panel;HPO;Ilyas_M_(2020)_F1000Res;Vissers_LE_(2016)_Nat_Rev_Genet;Opentarget_textMining;Phenolyser;Radboudumc_:_Exome_panels;SysID_primary_ID_genes	10
NDST1	ENSG00000070614	5	DisGenNet;HPO;IPA;Ilyas_M_(2020)_F1000Res;Vissers_LE_(2016)_Nat_Rev_Genet;OMIM-2022-12-09;Opentarget_genetic_association;Opentarget_textMining;Orphanet;Phenolyser;Radboudumc_:_Exome_panels;SysID_primary_ID_genes	12
NDUFA1	ENSG00000125356	X	Fulgent_:_gene_panel;Ilyas_M_(2020)_F1000Res;Vissers_LE_(2016)_Nat_Rev_Genet;Radboudumc_:_Exome_panels;SysID_primary_ID_genes	5
NDUFA10	ENSG00000130414	2	DDG2P;DisGenNet;HPO;Phenolyser;SysID_candidate_ID_genes	5
NDUFA11	ENSG00000174886	19	Ilyas_M_(2020)_F1000Res;Vissers_LE_(2016)_Nat_Rev_Genet;Radboudumc_:_Exome_panels;SysID_primary_ID_genes	4
NDUFA12	ENSG00000184752	12	DisGenNet;HPO;Ilyas_M_(2020)_F1000Res;Vissers_LE_(2016)_Nat_Rev_Genet;Phenolyser;Radboudumc_:_Exome_panels;SysID_candidate_ID_genes	7
NDUFA13	ENSG00000186010	19	DisGenNet;HPO;Phenolyser;SysID_candidate_ID_genes	4
NDUFA2	ENSG00000131495	5	DisGenNet;HPO;Phenolyser;Radboudumc_:_Exome_panels;SysID_primary_ID_genes	5
NDUFA4	ENSG00000189043	7	DisGenNet;HPO;Phenolyser;SysID_candidate_ID_genes	4
NDUFA9	ENSG00000139180	12	DDG2P;DisGenNet;HPO;Phenolyser;SysID_candidate_ID_genes	5
NDUFAF1	ENSG00000137806	15	DisGenNet;HPO;Phenolyser	3
NDUFAF2	ENSG00000164182	5	DDG2P;DisGenNet;HPO;Ilyas_M_(2020)_F1000Res;Phenolyser;SysID_primary_ID_genes	6
NDUFAF3	ENSG00000178057	3	DisGenNet;HPO;Radboudumc_:_Exome_panels;SysID_primary_ID_genes	4
NDUFAF4	ENSG00000123545	6	DisGenNet;HPO;Phenolyser	3
NDUFAF5	ENSG00000101247	20	DisGenNet;Fulgent_:_gene_panel;HPO;Phenolyser;Radboudumc_:_Exome_panels;SysID_primary_ID_genes	6
NDUFAF6	ENSG00000156170	8	DisGenNet;HPO;Phenolyser;SysID_primary_ID_genes	4
NDUFB11	ENSG00000147123	X	DisGenNet;HPO;Phenolyser;SysID_candidate_ID_genes	4
NDUFB3	ENSG00000119013	2	DisGenNet;HPO;Phenolyser	3
NDUFB8	ENSG00000166136	10	DisGenNet;HPO;SysID_primary_ID_genes	3
NDUFB9	ENSG00000147684	8	DisGenNet;HPO;Phenolyser	3
NDUFS1	ENSG00000023228	2	DDG2P;DisGenNet;Fulgent_:_gene_panel;HPO;Ilyas_M_(2020)_F1000Res;Vissers_LE_(2016)_Nat_Rev_Genet;Phenolyser;Radboudumc_:_Exome_panels;SysID_primary_ID_genes	9
NDUFS2	ENSG00000158864	1	DisGenNet;HPO;Ilyas_M_(2020)_F1000Res;Vissers_LE_(2016)_Nat_Rev_Genet;Phenolyser;Radboudumc_:_Exome_panels;SysID_primary_ID_genes	7
NDUFS3	ENSG00000213619	11	DisGenNet;HPO;Ilyas_M_(2020)_F1000Res;Vissers_LE_(2016)_Nat_Rev_Genet;Phenolyser;Radboudumc_:_Exome_panels;SysID_primary_ID_genes	7
NDUFS4	ENSG00000164258	5	DDG2P;DisGenNet;HPO;Ilyas_M_(2020)_F1000Res;Vissers_LE_(2016)_Nat_Rev_Genet;Phenolyser;Radboudumc_:_Exome_panels;SysID_primary_ID_genes	8
NDUFS6	ENSG00000145494	5	IPA;Opentarget_genetic_association;Radboudumc_:_Exome_panels;SysID_candidate_ID_genes	4
NDUFS7	ENSG00000115286	19	DisGenNet;HPO;IPA;Ilyas_M_(2020)_F1000Res;Vissers_LE_(2016)_Nat_Rev_Genet;Opentarget_genetic_association;Phenolyser;Radboudumc_:_Exome_panels;SysID_primary_ID_genes	9
NDUFS8	ENSG00000110717	11	DDG2P;DisGenNet;HPO;Ilyas_M_(2020)_F1000Res;Vissers_LE_(2016)_Nat_Rev_Genet;Phenolyser;Radboudumc_:_Exome_panels;SysID_primary_ID_genes	8
NDUFV1	ENSG00000167792	11	DisGenNet;HPO;Ilyas_M_(2020)_F1000Res;Vissers_LE_(2016)_Nat_Rev_Genet;Opentarget_textMining;Phenolyser;Radboudumc_:_Exome_panels;SysID_primary_ID_genes	8
NDUFV2	ENSG00000178127	18	DisGenNet;HPO;Phenolyser;Radboudumc_:_Exome_panels;SysID_primary_ID_genes	5
NEB	ENSG00000183091	2	DisGenNet;Opentarget_textMining;SysID_candidate_ID_genes	3
NECAP1	ENSG00000089818	12	DisGenNet;HPO;Opentarget_genetic_association;SysID_primary_ID_genes	4
NECTIN1	ENSG00000110400	11	DisGenNet;HPO;Opentarget_textMining;SysID_primary_ID_genes	4
NEDD4L	ENSG00000049759	18	DDG2P;DisGenNet;HPO;IPA;Vissers_LE_(2016)_Nat_Rev_Genet;Opentarget_genetic_association;Phenolyser;Radboudumc_:_Exome_panels;SysID_primary_ID_genes	9
NEFL	ENSG00000277586	8	DisGenNet;IPA;Opentarget_textMining	3
NEGR1	ENSG00000172260	1	DisGenNet;Fulgent_:_gene_panel;Opentarget_textMining	3
NEK2	ENSG00000117650	1	DisGenNet;HPO;Phenolyser	3
NELFA	ENSG00000185049	4	DisGenNet;HPO;Opentarget_textMining;Phenolyser	4
NEMF	ENSG00000165525	14	HPO;IPA;OMIM-2022-12-09;Opentarget_genetic_association;Opentarget_textMining;Orphanet;Radboudumc_:_Exome_panels;SysID_primary_ID_genes	8
NEU1	ENSG00000204386	6	DDG2P;DisGenNet;HPO;Ilyas_M_(2020)_F1000Res;Vissers_LE_(2016)_Nat_Rev_Genet;Phenolyser;Radboudumc_:_Exome_panels;SysID_primary_ID_genes	8
NEUROD2	ENSG00000171532	17	DisGenNet;HPO;Radboudumc_:_Exome_panels;SysID_primary_ID_genes	4
NEXMIF	ENSG00000050030	X	AutDB;DDG2P;DisGenNet;Fulgent_:_gene_panel;HPO;IPA;Ilyas_M_(2020)_F1000Res;OMIM-2022-12-09;Opentarget_genetic_association;Opentarget_textMining;Orphanet;Radboudumc_:_Exome_panels;SysID_primary_ID_genes	13
NF1	ENSG00000196712	17	DDG2P;DisGenNet;Fulgent_:_gene_panel;HPO;IPA;Ilyas_M_(2020)_F1000Res;Mireia_Coll-TanÃ©_(2019)_Dis_Model_Mech;Vissers_LE_(2016)_Nat_Rev_Genet;Opentarget_genetic_association;Opentarget_textMining;Phenolyser;Radboudumc_:_Exome_panels;SysID_primary_ID_genes	13
NFE2L2	ENSG00000116044	2	DisGenNet;HPO;Phenolyser;Radboudumc_:_Exome_panels	4
NFIA	ENSG00000162599	1	DDG2P;DisGenNet;HPO;Ilyas_M_(2020)_F1000Res;Vissers_LE_(2016)_Nat_Rev_Genet;Opentarget_genetic_association;Opentarget_textMining;Phenolyser;Radboudumc_:_Exome_panels;SysID_primary_ID_genes	10
NFIB	ENSG00000147862	9	DDG2P;DisGenNet;IPA;OMIM-2022-12-09;Opentarget_genetic_association;Opentarget_textMining;Radboudumc_:_Exome_panels;SysID_primary_ID_genes	8
NFIX	ENSG00000008441	19	DisGenNet;HPO;IPA;Coe_B.P_(2019)_Nat_Genet;Ilyas_M_(2020)_F1000Res;Vissers_LE_(2016)_Nat_Rev_Genet;Opentarget_genetic_association;Opentarget_textMining;Phenolyser;Radboudumc_:_Exome_panels;SysID_primary_ID_genes	11
NFKB2	ENSG00000077150	10	DisGenNet;HPO;Phenolyser	3
NFU1	ENSG00000169599	2	DDG2P;DisGenNet;HPO;Phenolyser	4
NGF	ENSG00000134259	1	DisGenNet;Fulgent_:_gene_panel;HPO;Opentarget_textMining;Phenolyser	5
NGFR	ENSG00000064300	17	DisGenNet;Opentarget_textMining;SysID_candidate_ID_genes	3
NGLY1	ENSG00000151092	3	Fulgent_:_gene_panel;HPO;Ilyas_M_(2020)_F1000Res;Opentarget_genetic_association;Opentarget_textMining;Radboudumc_:_Exome_panels;SysID_primary_ID_genes	7
NHP2	ENSG00000145912	5	DDG2P;DisGenNet;Fulgent_:_gene_panel;HPO;Phenolyser;SysID_candidate_ID_genes	6
NHS	ENSG00000188158	X	DDG2P;DisGenNet;Fulgent_:_gene_panel;HPO;Ilyas_M_(2020)_F1000Res;Vissers_LE_(2016)_Nat_Rev_Genet;Opentarget_genetic_association;Opentarget_textMining;Phenolyser;Radboudumc_:_Exome_panels;SysID_primary_ID_genes	11
NIN	ENSG00000100503	14	DisGenNet;HPO;Phenolyser;SysID_candidate_ID_genes	4
NIPA1	ENSG00000170113	15	HPO;IPA;Opentarget_textMining	3
NIPA2	ENSG00000140157	15	HPO;IPA;Opentarget_textMining	3
NIPBL	ENSG00000164190	5	DDG2P;DisGenNet;Fulgent_:_gene_panel;HPO;IPA;Ilyas_M_(2020)_F1000Res;Vissers_LE_(2016)_Nat_Rev_Genet;Opentarget_genetic_association;Opentarget_textMining;Phenolyser;Radboudumc_:_Exome_panels;SysID_primary_ID_genes	12
NKAP	ENSG00000101882	X	DisGenNet;IPA;OMIM-2022-12-09;Opentarget_genetic_association;Radboudumc_:_Exome_panels;SysID_primary_ID_genes	6
NKX2-1	ENSG00000136352	14	DisGenNet;HPO;Ilyas_M_(2020)_F1000Res;Opentarget_textMining;Phenolyser;Radboudumc_:_Exome_panels;SysID_primary_ID_genes	7
NKX2-5	ENSG00000183072	5	DDG2P;DisGenNet;HPO;Phenolyser	4
NKX6-2	ENSG00000148826	10	DisGenNet;HPO;SysID_primary_ID_genes	3
NLGN1	ENSG00000169760	3	DisGenNet;IPA;Opentarget_genetic_association;Opentarget_textMining	4
NLGN2	ENSG00000169992	17	DisGenNet;Opentarget_textMining;Radboudumc_:_Exome_panels;SysID_candidate_ID_genes	4
NLGN3	ENSG00000196338	X	DisGenNet;Fulgent_:_gene_panel;HPO;IPA;Ilyas_M_(2020)_F1000Res;Vissers_LE_(2016)_Nat_Rev_Genet;Opentarget_genetic_association;Opentarget_textMining;Phenolyser;Radboudumc_:_Exome_panels;SysID_primary_ID_genes	11
NLGN4	ENSG00000146938	X	0	0
NLGN4X	ENSG00000146938	X	DDG2P;DisGenNet;Fulgent_:_gene_panel;HPO;IPA;Opentarget_genetic_association;Opentarget_textMining;Phenolyser;Radboudumc_:_Exome_panels;SysID_primary_ID_genes	10
NLGN4Y	ENSG00000165246	Y	DisGenNet;Opentarget_textMining;SysID_candidate_ID_genes	3
NLRP3	ENSG00000162711	1	DisGenNet;HPO;Vissers_LE_(2016)_Nat_Rev_Genet;Phenolyser;SysID_primary_ID_genes	5
NMNAT1	ENSG00000173614	1	DisGenNet;HPO;IPA;Ilyas_M_(2020)_F1000Res;OMIM-2022-12-09;Opentarget_textMining;Phenolyser;SysID_primary_ID_genes	8
NODAL	ENSG00000156574	10	DisGenNet;HPO;Ilyas_M_(2020)_F1000Res;Phenolyser	4
NOG	ENSG00000183691	17	DisGenNet;Ilyas_M_(2020)_F1000Res;Opentarget_textMining;Phenolyser	4
NONO	ENSG00000147140	X	DDG2P;DisGenNet;HPO;IPA;Coe_B.P_(2019)_Nat_Genet;Ilyas_M_(2020)_F1000Res;OMIM-2022-12-09;Opentarget_textMining;Orphanet;Phenolyser;Radboudumc_:_Exome_panels;SysID_primary_ID_genes	12
NOP10	ENSG00000182117	15	DDG2P;DisGenNet;HPO;Phenolyser	4
NOS1	ENSG00000089250	12	DisGenNet;IPA;Phenolyser	3
NOTCH1	ENSG00000148400	9	DisGenNet;HPO;Phenolyser;SysID_candidate_ID_genes	4
NOTCH3	ENSG00000074181	19	DisGenNet;HPO;Phenolyser	3
NOVA2	ENSG00000104967	19	DDG2P;HPO;IPA;Opentarget_genetic_association;Radboudumc_:_Exome_panels;SysID_primary_ID_genes	6
NPAP1	ENSG00000185823	15	DisGenNet;HPO;Opentarget_textMining;Phenolyser	4
NPAS3	ENSG00000151322	14	DisGenNet;Opentarget_textMining;SysID_candidate_ID_genes	3
NPAS4	ENSG00000174576	11	DisGenNet;Opentarget_textMining;SysID_candidate_ID_genes	3
NPC1	ENSG00000141458	18	DDG2P;DisGenNet;Fulgent_:_gene_panel;HPO;Ilyas_M_(2020)_F1000Res;Opentarget_genetic_association;Opentarget_textMining;Phenolyser;Radboudumc_:_Exome_panels;SysID_candidate_ID_genes	10
NPC2	ENSG00000119655	14	DDG2P;DisGenNet;Fulgent_:_gene_panel;HPO;Ilyas_M_(2020)_F1000Res;Phenolyser;Radboudumc_:_Exome_panels;SysID_candidate_ID_genes	8
NPHP1	ENSG00000144061	2	DisGenNet;HPO;Ilyas_M_(2020)_F1000Res;Vissers_LE_(2016)_Nat_Rev_Genet;Opentarget_textMining;Phenolyser;Radboudumc_:_Exome_panels;SysID_primary_ID_genes	8
NPHP3	ENSG00000113971	3	DisGenNet;HPO;Phenolyser	3
NPHP4	ENSG00000131697	1	DisGenNet;HPO;Phenolyser	3
NPR2	ENSG00000159899	9	IPA;Ilyas_M_(2020)_F1000Res;Opentarget_genetic_association	3
NPRL3	ENSG00000103148	16	HPO;IPA;Opentarget_genetic_association;SysID_candidate_ID_genes	4
NR1I3	ENSG00000143257	1	DDG2P;IPA;Mireia_Coll-TanÃ©_(2019)_Dis_Model_Mech;SysID_candidate_ID_genes	4
NR2E3	ENSG00000278570	15	DisGenNet;HPO;Phenolyser	3
NR2F1	ENSG00000175745	5	DisGenNet;Fulgent_:_gene_panel;HPO;Coe_B.P_(2019)_Nat_Genet;Ilyas_M_(2020)_F1000Res;Vissers_LE_(2016)_Nat_Rev_Genet;Opentarget_textMining;Orphanet;Phenolyser;Radboudumc_:_Exome_panels;SysID_primary_ID_genes	11
NR3C2	ENSG00000151623	4	IPA;Opentarget_textMining;SysID_candidate_ID_genes	3
NR4A2	ENSG00000153234	2	DisGenNet;HPO;IPA;Coe_B.P_(2019)_Nat_Genet;OMIM-2022-12-09;Opentarget_textMining;Radboudumc_:_Exome_panels;SysID_primary_ID_genes	8
NRAS	ENSG00000213281	1	DDG2P;DisGenNet;HPO;Ilyas_M_(2020)_F1000Res;Vissers_LE_(2016)_Nat_Rev_Genet;Opentarget_textMining;Phenolyser;Radboudumc_:_Exome_panels;SysID_primary_ID_genes	9
NRCAM	ENSG00000091129	7	DisGenNet;HPO;IPA;Opentarget_textMining;Orphanet	5
NRL	ENSG00000129535	14	DisGenNet;HPO;Phenolyser	3
NRTN	ENSG00000171119	19	DisGenNet;HPO;Phenolyser	3
NRXN1	ENSG00000179915	2	DDG2P;DisGenNet;Fulgent_:_gene_panel;HPO;IPA;Ilyas_M_(2020)_F1000Res;Vissers_LE_(2016)_Nat_Rev_Genet;Opentarget_genetic_association;Opentarget_textMining;Phenolyser;Radboudumc_:_Exome_panels;SysID_primary_ID_genes	12
NRXN2	ENSG00000110076	11	DDG2P;DisGenNet;IPA;Ilyas_M_(2020)_F1000Res;Opentarget_genetic_association;Opentarget_textMining;SysID_candidate_ID_genes	7
NRXN3	ENSG00000021645	14	DDG2P;DisGenNet;IPA;Opentarget_genetic_association;Phenolyser;SysID_candidate_ID_genes	6
NSD1	ENSG00000165671	5	DDG2P;DisGenNet;Fulgent_:_gene_panel;HPO;IPA;Coe_B.P_(2019)_Nat_Genet;Ilyas_M_(2020)_F1000Res;Vissers_LE_(2016)_Nat_Rev_Genet;Opentarget_genetic_association;Opentarget_textMining;Phenolyser;Radboudumc_:_Exome_panels;SysID_primary_ID_genes	13
NSD2	ENSG00000109685	4	DisGenNet;HPO;Opentarget_genetic_association;Opentarget_textMining;Radboudumc_:_Exome_panels;SysID_primary_ID_genes	6
NSDHL	ENSG00000147383	X	DDG2P;DisGenNet;Fulgent_:_gene_panel;HPO;IPA;Ilyas_M_(2020)_F1000Res;Vissers_LE_(2016)_Nat_Rev_Genet;Opentarget_genetic_association;Opentarget_textMining;Phenolyser;Radboudumc_:_Exome_panels;SysID_primary_ID_genes	12
NSF	ENSG00000073969	17	DisGenNet;HPO;Opentarget_genetic_association;Radboudumc_:_Exome_panels;SysID_candidate_ID_genes	5
NSMCE3	ENSG00000185115	15	DisGenNet;HPO;Opentarget_textMining	3
NSUN2	ENSG00000037474	5	DDG2P;DisGenNet;Fulgent_:_gene_panel;HPO;IPA;Ilyas_M_(2020)_F1000Res;Vissers_LE_(2016)_Nat_Rev_Genet;OMIM-2022-12-09;Opentarget_genetic_association;Opentarget_textMining;Orphanet;Phenolyser;Radboudumc_:_Exome_panels;SysID_primary_ID_genes	14
NT5C2	ENSG00000076685	10	DisGenNet;HPO;Ilyas_M_(2020)_F1000Res;Opentarget_genetic_association;Opentarget_textMining;Phenolyser;Radboudumc_:_Exome_panels;SysID_primary_ID_genes	8
NTF4	ENSG00000225950	19	DisGenNet;Opentarget_textMining;Phenolyser	3
NTN1	ENSG00000065320	17	DisGenNet;HPO;Phenolyser;SysID_candidate_ID_genes	4
NTNG1	ENSG00000162631	1	DisGenNet;Fulgent_:_gene_panel;HPO;Orphanet;Phenolyser;SysID_candidate_ID_genes	6
NTNG2	ENSG00000196358	9	DisGenNet;HPO;IPA;Opentarget_textMining;Orphanet;Radboudumc_:_Exome_panels;SysID_primary_ID_genes	7
NTRK1	ENSG00000198400	1	DDG2P;DisGenNet;HPO;IPA;Ilyas_M_(2020)_F1000Res;Vissers_LE_(2016)_Nat_Rev_Genet;Opentarget_genetic_association;Opentarget_textMining;Phenolyser;Radboudumc_:_Exome_panels;SysID_primary_ID_genes	11
NTRK2	ENSG00000148053	9	DDG2P;DisGenNet;HPO;Opentarget_genetic_association;Opentarget_textMining;Phenolyser;Radboudumc_:_Exome_panels;SysID_primary_ID_genes	8
NUBPL	ENSG00000151413	14	DDG2P;DisGenNet;HPO;Opentarget_textMining;Phenolyser	5
NUDT2	ENSG00000164978	9	DisGenNet;HPO;IPA;OMIM-2022-12-09;Opentarget_genetic_association;Opentarget_textMining;Radboudumc_:_Exome_panels;SysID_primary_ID_genes	8
NUFIP2	ENSG00000108256	17	DisGenNet;OMIM-2022-12-09;Opentarget_textMining	3
NUP107	ENSG00000111581	12	DisGenNet;HPO;Opentarget_genetic_association;Opentarget_textMining;Phenolyser	5
NUP205	ENSG00000155561	7	IPA;Opentarget_textMining;SysID_candidate_ID_genes	3
NUP214	ENSG00000126883	9	Opentarget_genetic_association;Radboudumc_:_Exome_panels;SysID_primary_ID_genes	3
NUP62	ENSG00000213024	19	DDG2P;DisGenNet;HPO;Ilyas_M_(2020)_F1000Res;Opentarget_genetic_association;Phenolyser;Radboudumc_:_Exome_panels;SysID_candidate_ID_genes	8
NUP85	ENSG00000125450	17	HPO;Radboudumc_:_Exome_panels;SysID_candidate_ID_genes	3
NUS1	ENSG00000153989	6	DDG2P;DisGenNet;HPO;IPA;OMIM-2022-12-09;Opentarget_genetic_association;Opentarget_textMining;Phenolyser;Radboudumc_:_Exome_panels;SysID_primary_ID_genes	10
NXF5	ENSG00000126952	X	DisGenNet;Opentarget_textMining;SysID_candidate_ID_genes	3
NXN	ENSG00000167693	17	DisGenNet;HPO;Phenolyser	3
OCA2	ENSG00000104044	15	HPO;IPA;Phenolyser	3
OCLN	ENSG00000197822	5	HPO;Ilyas_M_(2020)_F1000Res;Vissers_LE_(2016)_Nat_Rev_Genet;Opentarget_textMining;Phenolyser;Radboudumc_:_Exome_panels;SysID_primary_ID_genes	7
OCRL	ENSG00000122126	X	DDG2P;DisGenNet;Fulgent_:_gene_panel;HPO;IPA;Ilyas_M_(2020)_F1000Res;Vissers_LE_(2016)_Nat_Rev_Genet;Opentarget_genetic_association;Opentarget_textMining;Phenolyser;Radboudumc_:_Exome_panels;SysID_primary_ID_genes	12
ODC1	ENSG00000115758	2	DisGenNet;Coe_B.P_(2019)_Nat_Genet;Opentarget_genetic_association;Radboudumc_:_Exome_panels;SysID_primary_ID_genes	5
OFD1	ENSG00000046651	X	DDG2P;DisGenNet;Fulgent_:_gene_panel;HPO;Ilyas_M_(2020)_F1000Res;Vissers_LE_(2016)_Nat_Rev_Genet;Opentarget_genetic_association;Opentarget_textMining;Phenolyser;Radboudumc_:_Exome_panels;SysID_primary_ID_genes	11
OGDH	ENSG00000105953	7	DisGenNet;HPO;Phenolyser	3
OGT	ENSG00000147162	X	DisGenNet;Fulgent_:_gene_panel;HPO;IPA;Ilyas_M_(2020)_F1000Res;OMIM-2022-12-09;Opentarget_genetic_association;Opentarget_textMining;Phenolyser;Radboudumc_:_Exome_panels;SysID_primary_ID_genes	11
OPA1	ENSG00000198836	3	DisGenNet;HPO;IPA;Phenolyser	4
OPA3	ENSG00000125741	19	DisGenNet;HPO;Ilyas_M_(2020)_F1000Res;Phenolyser;Radboudumc_:_Exome_panels;SysID_candidate_ID_genes	6
OPHN1	ENSG00000079482	X	AutDB;DDG2P;DisGenNet;Fulgent_:_gene_panel;HPO;IPA;Ilyas_M_(2020)_F1000Res;Vissers_LE_(2016)_Nat_Rev_Genet;OMIM-2022-12-09;Opentarget_genetic_association;Opentarget_textMining;Orphanet;Phenolyser;Radboudumc_:_Exome_panels;SysID_primary_ID_genes	15
ORC1	ENSG00000085840	1	DDG2P;DisGenNet;Fulgent_:_gene_panel;HPO;Ilyas_M_(2020)_F1000Res;Vissers_LE_(2016)_Nat_Rev_Genet;Phenolyser;Radboudumc_:_Exome_panels;SysID_primary_ID_genes	9
ORC4	ENSG00000115947	2	DisGenNet;HPO;Phenolyser	3
ORC6	ENSG00000091651	16	DisGenNet;HPO;Ilyas_M_(2020)_F1000Res;Phenolyser	4
OSGEP	ENSG00000092094	14	DisGenNet;HPO;Ilyas_M_(2020)_F1000Res;Opentarget_genetic_association;Phenolyser;Radboudumc_:_Exome_panels;SysID_primary_ID_genes	7
OTC	ENSG00000036473	X	DDG2P;DisGenNet;Fulgent_:_gene_panel;HPO;Ilyas_M_(2020)_F1000Res;Vissers_LE_(2016)_Nat_Rev_Genet;Phenolyser;Radboudumc_:_Exome_panels;SysID_candidate_ID_genes	9
OTUD5	ENSG00000068308	X	HPO;Orphanet;Radboudumc_:_Exome_panels;SysID_primary_ID_genes	4
OTUD6B	ENSG00000155100	8	DDG2P;DisGenNet;HPO;IPA;Ilyas_M_(2020)_F1000Res;OMIM-2022-12-09;Opentarget_genetic_association;Opentarget_textMining;Phenolyser;Radboudumc_:_Exome_panels;SysID_primary_ID_genes	11
OTUD7A	ENSG00000169918	15	DDG2P;Radboudumc_:_Exome_panels;SysID_candidate_ID_genes	3
OTX2	ENSG00000165588	14	DisGenNet;HPO;Ilyas_M_(2020)_F1000Res;Opentarget_textMining;Phenolyser;Radboudumc_:_Exome_panels;SysID_primary_ID_genes	7
OXR1	ENSG00000164830	8	DisGenNet;Opentarget_textMining;Radboudumc_:_Exome_panels;SysID_primary_ID_genes	4
OXTR	ENSG00000180914	3	IPA;Opentarget_textMining;Phenolyser	3
P3H1	ENSG00000117385	1	DDG2P;DisGenNet;HPO	3
P4HB	ENSG00000185624	17	DisGenNet;HPO;Phenolyser	3
P4HTM	ENSG00000178467	3	DisGenNet;HPO;IPA;OMIM-2022-12-09;Opentarget_genetic_association;Opentarget_textMining;Radboudumc_:_Exome_panels;SysID_primary_ID_genes	8
PACS1	ENSG00000175115	11	DDG2P;DisGenNet;Fulgent_:_gene_panel;HPO;IPA;Coe_B.P_(2019)_Nat_Genet;Ilyas_M_(2020)_F1000Res;Vissers_LE_(2016)_Nat_Rev_Genet;Opentarget_genetic_association;Opentarget_textMining;Orphanet;Phenolyser;Radboudumc_:_Exome_panels;SysID_primary_ID_genes	14
PACS2	ENSG00000179364	14	DisGenNet;HPO;IPA;Ilyas_M_(2020)_F1000Res;Opentarget_genetic_association;Opentarget_textMining;Phenolyser;Radboudumc_:_Exome_panels;SysID_primary_ID_genes	9
PAFAH1B1	ENSG00000007168	17	DDG2P;DisGenNet;Fulgent_:_gene_panel;HPO;IPA;Ilyas_M_(2020)_F1000Res;Vissers_LE_(2016)_Nat_Rev_Genet;Opentarget_genetic_association;Opentarget_textMining;Phenolyser;Radboudumc_:_Exome_panels;SysID_primary_ID_genes	12
PAFAH1B3	ENSG00000079462	19	DisGenNet;IPA;Opentarget_textMining	3
PAH	ENSG00000171759	12	DDG2P;DisGenNet;Fulgent_:_gene_panel;HPO;IPA;Ilyas_M_(2020)_F1000Res;Vissers_LE_(2016)_Nat_Rev_Genet;Opentarget_genetic_association;Opentarget_textMining;Phenolyser;Radboudumc_:_Exome_panels;SysID_primary_ID_genes	12
PAK1	ENSG00000149269	11	DisGenNet;HPO;IPA;OMIM-2022-12-09;Opentarget_genetic_association;Opentarget_textMining;Radboudumc_:_Exome_panels;SysID_primary_ID_genes	8
PAK3	ENSG00000077264	X	DDG2P;DisGenNet;Fulgent_:_gene_panel;HPO;IPA;Ilyas_M_(2020)_F1000Res;Vissers_LE_(2016)_Nat_Rev_Genet;OMIM-2022-12-09;Opentarget_genetic_association;Opentarget_textMining;Orphanet;Phenolyser;Radboudumc_:_Exome_panels;SysID_primary_ID_genes	14
PALB2	ENSG00000083093	16	DisGenNet;HPO;Phenolyser	3
PALS1	ENSG00000072415	14	HPO;Opentarget_genetic_association;Orphanet;Radboudumc_:_Exome_panels;SysID_candidate_ID_genes	5
PAM16	ENSG00000217930	16	DisGenNet;HPO;Phenolyser	3
PANK2	ENSG00000125779	20	Ilyas_M_(2020)_F1000Res;Vissers_LE_(2016)_Nat_Rev_Genet;Radboudumc_:_Exome_panels;SysID_primary_ID_genes	4
PAPSS2	ENSG00000198682	10	DisGenNet;Ilyas_M_(2020)_F1000Res;Opentarget_textMining	3
PARN	ENSG00000140694	16	DisGenNet;HPO;Ilyas_M_(2020)_F1000Res;Phenolyser;Radboudumc_:_Exome_panels;SysID_primary_ID_genes	6
PARP1	ENSG00000143799	1	DisGenNet;Ilyas_M_(2020)_F1000Res;SysID_candidate_ID_genes	3
PARP6	ENSG00000137817	15	Opentarget_genetic_association;Radboudumc_:_Exome_panels;SysID_primary_ID_genes	3
PARS2	ENSG00000162396	1	DisGenNet;HPO;IPA;SysID_primary_ID_genes	4
PAX1	ENSG00000125813	20	DisGenNet;HPO;Vissers_LE_(2016)_Nat_Rev_Genet;Phenolyser;Radboudumc_:_Exome_panels;SysID_candidate_ID_genes	6
PAX2	ENSG00000075891	10	DDG2P;DisGenNet;HPO;Opentarget_textMining;Phenolyser	5
PAX3	ENSG00000135903	2	DisGenNet;HPO;IPA;Ilyas_M_(2020)_F1000Res;Opentarget_genetic_association;Opentarget_textMining;Phenolyser	7
PAX6	ENSG00000007372	11	DDG2P;DisGenNet;Fulgent_:_gene_panel;HPO;IPA;Ilyas_M_(2020)_F1000Res;Vissers_LE_(2016)_Nat_Rev_Genet;Opentarget_textMining;Orphanet;Phenolyser;Radboudumc_:_Exome_panels;SysID_primary_ID_genes	12
PAX7	ENSG00000009709	1	Phenolyser;Radboudumc_:_Exome_panels;SysID_candidate_ID_genes	3
PAX8	ENSG00000125618	2	DisGenNet;HPO;Ilyas_M_(2020)_F1000Res;Vissers_LE_(2016)_Nat_Rev_Genet;Phenolyser;Radboudumc_:_Exome_panels;SysID_candidate_ID_genes	7
PBX1	ENSG00000185630	1	DisGenNet;Opentarget_textMining;Radboudumc_:_Exome_panels;SysID_primary_ID_genes	4
PC	ENSG00000173599	11	DDG2P;DisGenNet;HPO;Ilyas_M_(2020)_F1000Res;Vissers_LE_(2016)_Nat_Rev_Genet;Phenolyser;Radboudumc_:_Exome_panels;SysID_primary_ID_genes	8
PCCA	ENSG00000175198	13	DisGenNet;HPO;Ilyas_M_(2020)_F1000Res;Phenolyser;Radboudumc_:_Exome_panels;SysID_candidate_ID_genes	6
PCCB	ENSG00000114054	3	DisGenNet;HPO;Ilyas_M_(2020)_F1000Res;Opentarget_textMining;Phenolyser;Radboudumc_:_Exome_panels;SysID_candidate_ID_genes	7
PCDH12	ENSG00000113555	5	DisGenNet;HPO;Opentarget_genetic_association;Phenolyser;Radboudumc_:_Exome_panels;SysID_primary_ID_genes	6
PCDH15	ENSG00000150275	10	DisGenNet;HPO;Phenolyser	3
PCDH19	ENSG00000165194	X	DisGenNet;Fulgent_:_gene_panel;HPO;IPA;Ilyas_M_(2020)_F1000Res;Vissers_LE_(2016)_Nat_Rev_Genet;Opentarget_genetic_association;Opentarget_textMining;Orphanet;Phenolyser;Radboudumc_:_Exome_panels;SysID_primary_ID_genes	12
PCDHGC4	ENSG00000242419	5	HPO;Orphanet;Radboudumc_:_Exome_panels;SysID_primary_ID_genes	4
PCGF2	ENSG00000277258	17	DDG2P;DisGenNet;Fulgent_:_gene_panel;HPO;IPA;Ilyas_M_(2020)_F1000Res;Vissers_LE_(2016)_Nat_Rev_Genet;Opentarget_genetic_association;Radboudumc_:_Exome_panels;SysID_primary_ID_genes	10
PCK1	ENSG00000124253	20	DisGenNet;HPO;Phenolyser	3
PCLO	ENSG00000186472	7	DisGenNet;Opentarget_textMining;Radboudumc_:_Exome_panels;SysID_primary_ID_genes	4
PCNA	ENSG00000132646	20	DisGenNet;HPO;Phenolyser	3
PCNT	ENSG00000160299	21	DDG2P;DisGenNet;Fulgent_:_gene_panel;HPO;Ilyas_M_(2020)_F1000Res;Vissers_LE_(2016)_Nat_Rev_Genet;Opentarget_genetic_association;Phenolyser;Radboudumc_:_Exome_panels;SysID_primary_ID_genes	10
PCYT1A	ENSG00000161217	3	DisGenNet;HPO;Opentarget_textMining;Phenolyser	4
PCYT2	ENSG00000185813	17	DDG2P;DisGenNet;HPO;Opentarget_genetic_association;Radboudumc_:_Exome_panels;SysID_primary_ID_genes	6
PDCD6IP	ENSG00000170248	3	HPO;Opentarget_genetic_association;SysID_candidate_ID_genes	3
PDE10A	ENSG00000112541	6	DisGenNet;HPO;Phenolyser;SysID_candidate_ID_genes	4
PDE2A	ENSG00000186642	11	HPO;IPA;OMIM-2022-12-09;Opentarget_genetic_association;Radboudumc_:_Exome_panels;SysID_primary_ID_genes	6
PDE4D	ENSG00000113448	5	DDG2P;DisGenNet;Fulgent_:_gene_panel;HPO;IPA;Ilyas_M_(2020)_F1000Res;Vissers_LE_(2016)_Nat_Rev_Genet;Opentarget_genetic_association;Opentarget_textMining;Phenolyser;Radboudumc_:_Exome_panels;SysID_primary_ID_genes	12
PDE6A	ENSG00000132915	5	DisGenNet;HPO;Phenolyser	3
PDE6B	ENSG00000133256	4	DisGenNet;HPO;Phenolyser	3
PDE6D	ENSG00000156973	2	DisGenNet;HPO;Phenolyser;SysID_primary_ID_genes	4
PDE6G	ENSG00000185527	17	DisGenNet;HPO;Ilyas_M_(2020)_F1000Res;Phenolyser	4
PDGFRB	ENSG00000113721	5	DisGenNet;Ilyas_M_(2020)_F1000Res;Opentarget_genetic_association;Radboudumc_:_Exome_panels;SysID_candidate_ID_genes	5
PDHA1	ENSG00000131828	X	DDG2P;DisGenNet;Fulgent_:_gene_panel;HPO;IPA;Coe_B.P_(2019)_Nat_Genet;Ilyas_M_(2020)_F1000Res;Vissers_LE_(2016)_Nat_Rev_Genet;Opentarget_genetic_association;Opentarget_textMining;Phenolyser;Radboudumc_:_Exome_panels;SysID_primary_ID_genes	13
PDHB	ENSG00000168291	3	IPA;Phenolyser;Radboudumc_:_Exome_panels	3
PDHX	ENSG00000110435	11	DDG2P;DisGenNet;Fulgent_:_gene_panel;HPO;IPA;Ilyas_M_(2020)_F1000Res;Phenolyser;Radboudumc_:_Exome_panels;SysID_primary_ID_genes	9
PDIA3	ENSG00000167004	15	DisGenNet;IPA;Opentarget_genetic_association;Opentarget_textMining	4
PDP1	ENSG00000164951	8	DisGenNet;HPO;Phenolyser;Radboudumc_:_Exome_panels;SysID_candidate_ID_genes	5
PDSS1	ENSG00000148459	10	DDG2P;DisGenNet;Fulgent_:_gene_panel;HPO;Ilyas_M_(2020)_F1000Res;Vissers_LE_(2016)_Nat_Rev_Genet;Phenolyser;Radboudumc_:_Exome_panels;SysID_primary_ID_genes	9
PDSS2	ENSG00000164494	6	Ilyas_M_(2020)_F1000Res;Vissers_LE_(2016)_Nat_Rev_Genet;Phenolyser;Radboudumc_:_Exome_panels;SysID_primary_ID_genes	5
PDX1	ENSG00000139515	13	DisGenNet;HPO;Phenolyser	3
PECR	ENSG00000115425	2	DisGenNet;Ilyas_M_(2020)_F1000Res;SysID_candidate_ID_genes	3
PEPD	ENSG00000124299	19	DisGenNet;HPO;Ilyas_M_(2020)_F1000Res;Vissers_LE_(2016)_Nat_Rev_Genet;Opentarget_textMining;Phenolyser;Radboudumc_:_Exome_panels;SysID_primary_ID_genes	8
PET100	ENSG00000229833	19	DDG2P;DisGenNet;HPO;Ilyas_M_(2020)_F1000Res;Opentarget_genetic_association;Phenolyser;Radboudumc_:_Exome_panels;SysID_primary_ID_genes	8
PEX1	ENSG00000127980	7	DDG2P;DisGenNet;HPO;Ilyas_M_(2020)_F1000Res;Vissers_LE_(2016)_Nat_Rev_Genet;Phenolyser;Radboudumc_:_Exome_panels;SysID_primary_ID_genes	8
PEX10	ENSG00000157911	1	DDG2P;DisGenNet;HPO;Ilyas_M_(2020)_F1000Res;Vissers_LE_(2016)_Nat_Rev_Genet;Phenolyser;Radboudumc_:_Exome_panels;SysID_primary_ID_genes	8
PEX11B	ENSG00000131779	1	DDG2P;DisGenNet;HPO;IPA;Ilyas_M_(2020)_F1000Res;Vissers_LE_(2016)_Nat_Rev_Genet;Opentarget_genetic_association;Phenolyser;Radboudumc_:_Exome_panels;SysID_candidate_ID_genes	10
PEX12	ENSG00000108733	17	DDG2P;DisGenNet;HPO;Ilyas_M_(2020)_F1000Res;Vissers_LE_(2016)_Nat_Rev_Genet;Phenolyser;Radboudumc_:_Exome_panels;SysID_primary_ID_genes	8
PEX13	ENSG00000162928	2	DDG2P;Ilyas_M_(2020)_F1000Res;Vissers_LE_(2016)_Nat_Rev_Genet;Phenolyser;Radboudumc_:_Exome_panels;SysID_primary_ID_genes	6
PEX14	ENSG00000142655	1	DDG2P;Ilyas_M_(2020)_F1000Res;Phenolyser;SysID_candidate_ID_genes	4
PEX16	ENSG00000121680	11	DDG2P;Ilyas_M_(2020)_F1000Res;Vissers_LE_(2016)_Nat_Rev_Genet;Phenolyser;Radboudumc_:_Exome_panels;SysID_candidate_ID_genes	6
PEX19	ENSG00000162735	1	DDG2P;Ilyas_M_(2020)_F1000Res;Vissers_LE_(2016)_Nat_Rev_Genet;Phenolyser;Radboudumc_:_Exome_panels;SysID_candidate_ID_genes	6
PEX2	ENSG00000164751	8	DDG2P;DisGenNet;HPO;Ilyas_M_(2020)_F1000Res;Vissers_LE_(2016)_Nat_Rev_Genet;Phenolyser;Radboudumc_:_Exome_panels;SysID_candidate_ID_genes	8
PEX26	ENSG00000215193	22	DDG2P;Ilyas_M_(2020)_F1000Res;Vissers_LE_(2016)_Nat_Rev_Genet;Phenolyser;Radboudumc_:_Exome_panels;SysID_primary_ID_genes	6
PEX3	ENSG00000034693	6	DDG2P;DisGenNet;Ilyas_M_(2020)_F1000Res;Vissers_LE_(2016)_Nat_Rev_Genet;Opentarget_textMining;Phenolyser;Radboudumc_:_Exome_panels;SysID_candidate_ID_genes	8
PEX5	ENSG00000139197	12	DDG2P;DisGenNet;HPO;Ilyas_M_(2020)_F1000Res;Vissers_LE_(2016)_Nat_Rev_Genet;Phenolyser;Radboudumc_:_Exome_panels;SysID_primary_ID_genes	8
PEX6	ENSG00000124587	6	DDG2P;DisGenNet;HPO;IPA;Ilyas_M_(2020)_F1000Res;Vissers_LE_(2016)_Nat_Rev_Genet;Phenolyser;Radboudumc_:_Exome_panels;SysID_primary_ID_genes	9
PEX7	ENSG00000112357	6	DDG2P;DisGenNet;Fulgent_:_gene_panel;HPO;IPA;Ilyas_M_(2020)_F1000Res;Vissers_LE_(2016)_Nat_Rev_Genet;Opentarget_genetic_association;Phenolyser;Radboudumc_:_Exome_panels;SysID_primary_ID_genes	11
PGAP1	ENSG00000197121	2	DDG2P;DisGenNet;HPO;IPA;Ilyas_M_(2020)_F1000Res;Vissers_LE_(2016)_Nat_Rev_Genet;Opentarget_textMining;Orphanet;Phenolyser;Radboudumc_:_Exome_panels;SysID_primary_ID_genes	11
PGAP2	ENSG00000148985	11	DDG2P;DisGenNet;HPO;IPA;Ilyas_M_(2020)_F1000Res;Vissers_LE_(2016)_Nat_Rev_Genet;OMIM-2022-12-09;Opentarget_genetic_association;Opentarget_textMining;Orphanet;Phenolyser;Radboudumc_:_Exome_panels;SysID_primary_ID_genes	13
PGAP3	ENSG00000161395	17	DisGenNet;HPO;IPA;Ilyas_M_(2020)_F1000Res;Vissers_LE_(2016)_Nat_Rev_Genet;OMIM-2022-12-09;Opentarget_textMining;Orphanet;Phenolyser;Radboudumc_:_Exome_panels;SysID_primary_ID_genes	11
PGK1	ENSG00000102144	X	DDG2P;DisGenNet;Fulgent_:_gene_panel;HPO;Ilyas_M_(2020)_F1000Res;Vissers_LE_(2016)_Nat_Rev_Genet;Opentarget_genetic_association;Opentarget_textMining;Phenolyser;Radboudumc_:_Exome_panels;SysID_primary_ID_genes	11
PGM1	ENSG00000079739	1	Ilyas_M_(2020)_F1000Res;Opentarget_textMining;Phenolyser;SysID_candidate_ID_genes	4
PGM3	ENSG00000013375	6	DisGenNet;HPO;Ilyas_M_(2020)_F1000Res;Opentarget_genetic_association;Phenolyser;Radboudumc_:_Exome_panels;SysID_primary_ID_genes	7
PHACTR1	ENSG00000112137	6	DDG2P;DisGenNet;HPO;Opentarget_textMining;Radboudumc_:_Exome_panels;SysID_candidate_ID_genes	6
PHC1	ENSG00000111752	12	DisGenNet;HPO;Opentarget_genetic_association;Opentarget_textMining;Phenolyser;SysID_candidate_ID_genes	6
PHF21A	ENSG00000135365	11	DDG2P;DisGenNet;HPO;IPA;Ilyas_M_(2020)_F1000Res;OMIM-2022-12-09;Opentarget_genetic_association;Opentarget_textMining;Phenolyser;Radboudumc_:_Exome_panels;SysID_primary_ID_genes	11
PHF3	ENSG00000118482	6	IPA;Opentarget_genetic_association;SysID_candidate_ID_genes	3
PHF6	ENSG00000156531	X	DDG2P;DisGenNet;Fulgent_:_gene_panel;HPO;IPA;Ilyas_M_(2020)_F1000Res;Vissers_LE_(2016)_Nat_Rev_Genet;Opentarget_genetic_association;Opentarget_textMining;Phenolyser;Radboudumc_:_Exome_panels;SysID_primary_ID_genes	12
PHF8	ENSG00000172943	X	DisGenNet;Fulgent_:_gene_panel;HPO;IPA;Coe_B.P_(2019)_Nat_Genet;Ilyas_M_(2020)_F1000Res;Vissers_LE_(2016)_Nat_Rev_Genet;OMIM-2022-12-09;Opentarget_genetic_association;Opentarget_textMining;Orphanet;Phenolyser;Radboudumc_:_Exome_panels;SysID_primary_ID_genes	14
PHGDH	ENSG00000092621	1	DDG2P;DisGenNet;HPO;Ilyas_M_(2020)_F1000Res;Vissers_LE_(2016)_Nat_Rev_Genet;Opentarget_textMining;Phenolyser;Radboudumc_:_Exome_panels;SysID_primary_ID_genes	9
PHIP	ENSG00000146247	6	AutDB;DDG2P;DisGenNet;HPO;IPA;Coe_B.P_(2019)_Nat_Genet;Ilyas_M_(2020)_F1000Res;Vissers_LE_(2016)_Nat_Rev_Genet;Opentarget_genetic_association;Opentarget_textMining;Orphanet;Phenolyser;Radboudumc_:_Exome_panels;SysID_primary_ID_genes	14
PHKA2	ENSG00000044446	X	DisGenNet;Fulgent_:_gene_panel;HPO;Opentarget_textMining	4
PHKG2	ENSG00000156873	16	DisGenNet;Fulgent_:_gene_panel;HPO	3
PHLPP1	ENSG00000081913	18	IPA;Opentarget_genetic_association;SysID_candidate_ID_genes	3
PHOX2B	ENSG00000109132	4	DisGenNet;HPO;Phenolyser	3
PHYH	ENSG00000107537	10	DisGenNet;HPO;Phenolyser	3
PI4KA	ENSG00000241973	22	HPO;IPA;Radboudumc_:_Exome_panels;SysID_primary_ID_genes	4
PIBF1	ENSG00000083535	13	DisGenNet;HPO;Opentarget_textMining;Phenolyser;Radboudumc_:_Exome_panels;SysID_primary_ID_genes	6
PIDD1	ENSG00000177595	11	HPO;IPA;OMIM-2022-12-09;Opentarget_genetic_association;Opentarget_textMining;Radboudumc_:_Exome_panels;SysID_primary_ID_genes	7
PIEZO1	ENSG00000103335	16	DisGenNet;HPO;Phenolyser	3
PIEZO2	ENSG00000154864	18	DisGenNet;HPO;Phenolyser;SysID_primary_ID_genes	4
PIGA	ENSG00000165195	X	DisGenNet;Fulgent_:_gene_panel;IPA;Ilyas_M_(2020)_F1000Res;Opentarget_genetic_association;Opentarget_textMining;Radboudumc_:_Exome_panels;SysID_primary_ID_genes	8
PIGB	ENSG00000069943	15	DisGenNet;IPA;Radboudumc_:_Exome_panels;SysID_primary_ID_genes	4
PIGC	ENSG00000135845	1	DisGenNet;HPO;IPA;Ilyas_M_(2020)_F1000Res;Opentarget_textMining;Orphanet;Phenolyser;Radboudumc_:_Exome_panels;SysID_primary_ID_genes	9
PIGF	ENSG00000151665	2	HPO;OMIM-2022-12-09;Radboudumc_:_Exome_panels;SysID_candidate_ID_genes	4
PIGG	ENSG00000174227	4	DDG2P;DisGenNet;HPO;IPA;Ilyas_M_(2020)_F1000Res;Opentarget_textMining;Orphanet;Phenolyser;Radboudumc_:_Exome_panels;SysID_primary_ID_genes	10
PIGH	ENSG00000100564	14	DisGenNet;HPO;Opentarget_textMining;Phenolyser	4
PIGK	ENSG00000142892	1	Opentarget_textMining;Radboudumc_:_Exome_panels;SysID_primary_ID_genes	3
PIGL	ENSG00000108474	17	DDG2P;DisGenNet;Fulgent_:_gene_panel;HPO;IPA;Ilyas_M_(2020)_F1000Res;Vissers_LE_(2016)_Nat_Rev_Genet;Opentarget_textMining;Orphanet;Phenolyser;Radboudumc_:_Exome_panels;SysID_primary_ID_genes	12
PIGN	ENSG00000197563	18	DisGenNet;HPO;IPA;Ilyas_M_(2020)_F1000Res;Vissers_LE_(2016)_Nat_Rev_Genet;Opentarget_genetic_association;Opentarget_textMining;Phenolyser;Radboudumc_:_Exome_panels;SysID_primary_ID_genes	10
PIGO	ENSG00000165282	9	DisGenNet;Fulgent_:_gene_panel;HPO;IPA;Ilyas_M_(2020)_F1000Res;Vissers_LE_(2016)_Nat_Rev_Genet;OMIM-2022-12-09;Opentarget_genetic_association;Opentarget_textMining;Orphanet;Phenolyser;Radboudumc_:_Exome_panels;SysID_primary_ID_genes	13
PIGP	ENSG00000185808	21	DisGenNet;HPO;Opentarget_genetic_association;Phenolyser;Radboudumc_:_Exome_panels;SysID_primary_ID_genes	6
PIGQ	ENSG00000007541	16	DisGenNet;HPO;Opentarget_textMining;Radboudumc_:_Exome_panels;SysID_primary_ID_genes	5
PIGS	ENSG00000087111	17	Opentarget_textMining;Radboudumc_:_Exome_panels;SysID_primary_ID_genes	3
PIGT	ENSG00000124155	20	HPO;Ilyas_M_(2020)_F1000Res;Vissers_LE_(2016)_Nat_Rev_Genet;Opentarget_textMining;Orphanet;Phenolyser;Radboudumc_:_Exome_panels;SysID_primary_ID_genes	8
PIGU	ENSG00000101464	20	DDG2P;DisGenNet;HPO;Radboudumc_:_Exome_panels;SysID_primary_ID_genes	5
PIGV	ENSG00000060642	1	DDG2P;DisGenNet;Fulgent_:_gene_panel;HPO;IPA;Ilyas_M_(2020)_F1000Res;Vissers_LE_(2016)_Nat_Rev_Genet;OMIM-2022-12-09;Opentarget_textMining;Orphanet;Phenolyser;Radboudumc_:_Exome_panels;SysID_primary_ID_genes	13
PIGW	ENSG00000277161	17	DisGenNet;HPO;IPA;Opentarget_textMining;Orphanet;Phenolyser;Radboudumc_:_Exome_panels;SysID_primary_ID_genes	8
PIGY	ENSG00000255072	4	DisGenNet;HPO;IPA;OMIM-2022-12-09;Opentarget_textMining;Orphanet;Phenolyser;Radboudumc_:_Exome_panels;SysID_primary_ID_genes	9
PIK3C2A	ENSG00000011405	11	DisGenNet;HPO;Opentarget_textMining	3
PIK3CA	ENSG00000121879	3	DDG2P;DisGenNet;HPO;Coe_B.P_(2019)_Nat_Genet;Ilyas_M_(2020)_F1000Res;Phenolyser;Radboudumc_:_Exome_panels;SysID_primary_ID_genes	8
PIK3CD	ENSG00000171608	1	DisGenNet;HPO;Opentarget_textMining	3
PIK3R2	ENSG00000105647	19	DDG2P;HPO;IPA;Ilyas_M_(2020)_F1000Res;Vissers_LE_(2016)_Nat_Rev_Genet;Opentarget_genetic_association;Phenolyser;Radboudumc_:_Exome_panels;SysID_primary_ID_genes	9
PISD	ENSG00000241878	22	DisGenNet;HPO;Opentarget_genetic_association;Orphanet;Radboudumc_:_Exome_panels;SysID_primary_ID_genes	6
PITRM1	ENSG00000107959	10	DisGenNet;HPO;Opentarget_genetic_association;Radboudumc_:_Exome_panels;SysID_primary_ID_genes	5
PITX2	ENSG00000164093	4	DisGenNet;Opentarget_textMining;Phenolyser	3
PITX3	ENSG00000107859	10	DisGenNet;HPO;Ilyas_M_(2020)_F1000Res;Opentarget_textMining;SysID_candidate_ID_genes	5
PJA1	ENSG00000181191	X	DisGenNet;Opentarget_genetic_association;Opentarget_textMining;Radboudumc_:_Exome_panels;SysID_candidate_ID_genes	5
PLA2G6	ENSG00000184381	22	DDG2P;DisGenNet;Fulgent_:_gene_panel;HPO;Ilyas_M_(2020)_F1000Res;Vissers_LE_(2016)_Nat_Rev_Genet;Phenolyser;Radboudumc_:_Exome_panels;SysID_primary_ID_genes	9
PLAA	ENSG00000137055	9	DisGenNet;HPO;Ilyas_M_(2020)_F1000Res;Phenolyser;Radboudumc_:_Exome_panels;SysID_primary_ID_genes	6
PLAG1	ENSG00000181690	8	DisGenNet;IPA;Opentarget_genetic_association	3
PLCB1	ENSG00000182621	20	Ilyas_M_(2020)_F1000Res;Vissers_LE_(2016)_Nat_Rev_Genet;Opentarget_textMining;Radboudumc_:_Exome_panels;SysID_primary_ID_genes	5
PLEKHG2	ENSG00000090924	19	DisGenNet;HPO;Opentarget_textMining;Phenolyser;SysID_primary_ID_genes	5
PLK4	ENSG00000142731	4	DisGenNet;HPO;Ilyas_M_(2020)_F1000Res;Phenolyser;Radboudumc_:_Exome_panels;SysID_primary_ID_genes	6
PLOD3	ENSG00000106397	7	DDG2P;DisGenNet;HPO;Phenolyser	4
PLP1	ENSG00000123560	X	DDG2P;DisGenNet;Fulgent_:_gene_panel;HPO;IPA;Ilyas_M_(2020)_F1000Res;Vissers_LE_(2016)_Nat_Rev_Genet;Opentarget_genetic_association;Opentarget_textMining;Phenolyser;Radboudumc_:_Exome_panels;SysID_primary_ID_genes	12
PLPBP	ENSG00000147471	8	DDG2P;DisGenNet;HPO;Ilyas_M_(2020)_F1000Res;Radboudumc_:_Exome_panels;SysID_primary_ID_genes	6
PLXNA1	ENSG00000114554	3	Opentarget_genetic_association;Opentarget_textMining;Orphanet;Radboudumc_:_Exome_panels;SysID_primary_ID_genes	5
PLXNA2	ENSG00000076356	1	Opentarget_genetic_association;Opentarget_textMining;Radboudumc_:_Exome_panels;SysID_candidate_ID_genes	4
PMM2	ENSG00000140650	16	DisGenNet;Fulgent_:_gene_panel;HPO;IPA;Ilyas_M_(2020)_F1000Res;Vissers_LE_(2016)_Nat_Rev_Genet;Opentarget_genetic_association;Opentarget_textMining;Phenolyser;Radboudumc_:_Exome_panels;SysID_primary_ID_genes	11
PMP22	ENSG00000109099	17	DisGenNet;HPO;Opentarget_textMining	3
PMPCA	ENSG00000165688	9	DisGenNet;HPO;Phenolyser;Radboudumc_:_Exome_panels;SysID_primary_ID_genes	5
PMPCB	ENSG00000105819	7	DisGenNet;HPO;Phenolyser;Radboudumc_:_Exome_panels;SysID_primary_ID_genes	5
PNKP	ENSG00000039650	19	DDG2P;DisGenNet;Fulgent_:_gene_panel;HPO;IPA;Ilyas_M_(2020)_F1000Res;Vissers_LE_(2016)_Nat_Rev_Genet;Opentarget_genetic_association;Opentarget_textMining;Phenolyser;Radboudumc_:_Exome_panels;SysID_primary_ID_genes	12
PNP	ENSG00000198805	14	DisGenNet;HPO;IPA;Ilyas_M_(2020)_F1000Res;Vissers_LE_(2016)_Nat_Rev_Genet;Phenolyser;Radboudumc_:_Exome_panels;SysID_primary_ID_genes	8
PNPLA6	ENSG00000032444	19	DisGenNet;HPO;IPA;Ilyas_M_(2020)_F1000Res;Phenolyser;Radboudumc_:_Exome_panels;SysID_primary_ID_genes	7
PNPO	ENSG00000108439	17	DisGenNet;HPO;Opentarget_genetic_association;Phenolyser	4
PNPT1	ENSG00000138035	2	DisGenNet;Ilyas_M_(2020)_F1000Res;SysID_primary_ID_genes	3
POC1A	ENSG00000164087	3	Ilyas_M_(2020)_F1000Res;Vissers_LE_(2016)_Nat_Rev_Genet;SysID_primary_ID_genes	3
PODXL	ENSG00000128567	7	DisGenNet;HPO;Phenolyser	3
POGZ	ENSG00000143442	1	DDG2P;DisGenNet;Fulgent_:_gene_panel;HPO;IPA;Coe_B.P_(2019)_Nat_Genet;Ilyas_M_(2020)_F1000Res;Vissers_LE_(2016)_Nat_Rev_Genet;Opentarget_genetic_association;Opentarget_textMining;Phenolyser;Radboudumc_:_Exome_panels;SysID_primary_ID_genes	13
POLA1	ENSG00000101868	X	DisGenNet;HPO;IPA;Orphanet;Phenolyser;Radboudumc_:_Exome_panels;SysID_primary_ID_genes	7
POLD1	ENSG00000062822	19	IPA;Ilyas_M_(2020)_F1000Res;Opentarget_genetic_association	3
POLG	ENSG00000140521	15	DisGenNet;HPO;IPA;Ilyas_M_(2020)_F1000Res;Vissers_LE_(2016)_Nat_Rev_Genet;Opentarget_genetic_association;Phenolyser;Radboudumc_:_Exome_panels;SysID_primary_ID_genes	9
POLR1C	ENSG00000171453	6	DisGenNet;HPO;Ilyas_M_(2020)_F1000Res;Phenolyser;Radboudumc_:_Exome_panels;SysID_primary_ID_genes	6
POLR1D	ENSG00000186184	13	DisGenNet;HPO;Phenolyser	3
POLR2A	ENSG00000181222	17	DDG2P;IPA;Radboudumc_:_Exome_panels;SysID_primary_ID_genes	4
POLR3A	ENSG00000148606	10	DisGenNet;HPO;Ilyas_M_(2020)_F1000Res;Vissers_LE_(2016)_Nat_Rev_Genet;Phenolyser;Radboudumc_:_Exome_panels;SysID_primary_ID_genes	7
POLR3B	ENSG00000013503	12	DisGenNet;HPO;Ilyas_M_(2020)_F1000Res;Vissers_LE_(2016)_Nat_Rev_Genet;Phenolyser;Radboudumc_:_Exome_panels;SysID_primary_ID_genes	7
POLRMT	ENSG00000099821	19	HPO;Opentarget_textMining;SysID_primary_ID_genes	3
POMGNT1	ENSG00000085998	1	DDG2P;DisGenNet;Fulgent_:_gene_panel;HPO;IPA;Ilyas_M_(2020)_F1000Res;Vissers_LE_(2016)_Nat_Rev_Genet;OMIM-2022-12-09;Opentarget_genetic_association;Phenolyser;Radboudumc_:_Exome_panels;SysID_primary_ID_genes	12
POMGNT2	ENSG00000144647	3	DisGenNet;HPO;IPA;Ilyas_M_(2020)_F1000Res;Opentarget_textMining;Phenolyser;Radboudumc_:_Exome_panels;SysID_primary_ID_genes	8
POMK	ENSG00000185900	8	DisGenNet;HPO;IPA;Opentarget_textMining;Phenolyser;Radboudumc_:_Exome_panels;SysID_primary_ID_genes	7
POMT1	ENSG00000130714	9	DDG2P;DisGenNet;Fulgent_:_gene_panel;HPO;IPA;Ilyas_M_(2020)_F1000Res;Vissers_LE_(2016)_Nat_Rev_Genet;OMIM-2022-12-09;Opentarget_genetic_association;Opentarget_textMining;Orphanet;Phenolyser;Radboudumc_:_Exome_panels;SysID_primary_ID_genes	14
POMT2	ENSG00000009830	14	DDG2P;DisGenNet;Fulgent_:_gene_panel;HPO;IPA;Ilyas_M_(2020)_F1000Res;Vissers_LE_(2016)_Nat_Rev_Genet;OMIM-2022-12-09;Opentarget_genetic_association;Opentarget_textMining;Orphanet;Phenolyser;Radboudumc_:_Exome_panels;SysID_primary_ID_genes	14
POR	ENSG00000127948	7	DisGenNet;HPO;Phenolyser;SysID_primary_ID_genes	4
PORCN	ENSG00000102312	X	DDG2P;DisGenNet;Fulgent_:_gene_panel;HPO;Ilyas_M_(2020)_F1000Res;Vissers_LE_(2016)_Nat_Rev_Genet;Phenolyser;Radboudumc_:_Exome_panels;SysID_primary_ID_genes	9
POU1F1	ENSG00000064835	3	DDG2P;DisGenNet;Fulgent_:_gene_panel;HPO;Ilyas_M_(2020)_F1000Res;Vissers_LE_(2016)_Nat_Rev_Genet;Opentarget_textMining;Phenolyser;Radboudumc_:_Exome_panels;SysID_candidate_ID_genes	10
POU3F2	ENSG00000184486	6	DisGenNet;Opentarget_textMining;SysID_candidate_ID_genes	3
POU3F3	ENSG00000198914	2	DDG2P;DisGenNet;HPO;Coe_B.P_(2019)_Nat_Genet;Opentarget_genetic_association;Opentarget_textMining;Radboudumc_:_Exome_panels;SysID_primary_ID_genes	8
POU3F4	ENSG00000196767	X	DisGenNet;HPO;Opentarget_textMining	3
PPARG	ENSG00000132170	3	DisGenNet;HPO;Opentarget_textMining;Phenolyser	4
PPFIBP1	ENSG00000110841	12	HPO;Opentarget_genetic_association;SysID_candidate_ID_genes	3
PPM1B	ENSG00000138032	2	DisGenNet;HPO;Phenolyser	3
PPM1D	ENSG00000170836	17	DDG2P;DisGenNet;HPO;IPA;Coe_B.P_(2019)_Nat_Genet;Ilyas_M_(2020)_F1000Res;Opentarget_textMining;Phenolyser;Radboudumc_:_Exome_panels;SysID_primary_ID_genes	10
PPOX	ENSG00000143224	1	Fulgent_:_gene_panel;Vissers_LE_(2016)_Nat_Rev_Genet;SysID_candidate_ID_genes	3
PPP1CB	ENSG00000213639	2	DisGenNet;Fulgent_:_gene_panel;HPO;Coe_B.P_(2019)_Nat_Genet;Ilyas_M_(2020)_F1000Res;Opentarget_textMining;Radboudumc_:_Exome_panels;SysID_primary_ID_genes	8
PPP1R12A	ENSG00000058272	12	DisGenNet;Opentarget_textMining;Radboudumc_:_Exome_panels;SysID_primary_ID_genes	4
PPP1R15B	ENSG00000158615	1	DDG2P;DisGenNet;HPO;Opentarget_textMining;Orphanet;Phenolyser;Radboudumc_:_Exome_panels;SysID_primary_ID_genes	8
PPP1R21	ENSG00000162869	2	Opentarget_textMining;Radboudumc_:_Exome_panels;SysID_candidate_ID_genes	3
PPP2CA	ENSG00000113575	5	DDG2P;DisGenNet;IPA;Opentarget_genetic_association;Opentarget_textMining;Radboudumc_:_Exome_panels;SysID_primary_ID_genes	7
PPP2R1A	ENSG00000105568	19	DDG2P;DisGenNet;Fulgent_:_gene_panel;HPO;IPA;Coe_B.P_(2019)_Nat_Genet;Ilyas_M_(2020)_F1000Res;Vissers_LE_(2016)_Nat_Rev_Genet;OMIM-2022-12-09;Opentarget_genetic_association;Orphanet;Phenolyser;Radboudumc_:_Exome_panels;SysID_primary_ID_genes	14
PPP2R5B	ENSG00000068971	11	DisGenNet;Opentarget_textMining;Radboudumc_:_Exome_panels;SysID_candidate_ID_genes	4
PPP2R5C	ENSG00000078304	14	IPA;Opentarget_genetic_association;Opentarget_textMining;Radboudumc_:_Exome_panels;SysID_candidate_ID_genes	5
PPP2R5D	ENSG00000112640	6	AutDB;DDG2P;DisGenNet;Fulgent_:_gene_panel;HPO;IPA;Coe_B.P_(2019)_Nat_Genet;Ilyas_M_(2020)_F1000Res;Vissers_LE_(2016)_Nat_Rev_Genet;OMIM-2022-12-09;Opentarget_genetic_association;Opentarget_textMining;Orphanet;Phenolyser;Radboudumc_:_Exome_panels;SysID_primary_ID_genes	16
PPP3CA	ENSG00000138814	4	DDG2P;DisGenNet;HPO;IPA;OMIM-2022-12-09;Opentarget_genetic_association;Orphanet;Phenolyser;Radboudumc_:_Exome_panels;SysID_primary_ID_genes	10
PPT1	ENSG00000131238	1	DisGenNet;Fulgent_:_gene_panel;HPO;IPA;Ilyas_M_(2020)_F1000Res;Vissers_LE_(2016)_Nat_Rev_Genet;Opentarget_genetic_association;Opentarget_textMining;Phenolyser;Radboudumc_:_Exome_panels;SysID_candidate_ID_genes	11
PQBP1	ENSG00000102103	X	DDG2P;DisGenNet;Fulgent_:_gene_panel;HPO;IPA;Ilyas_M_(2020)_F1000Res;Vissers_LE_(2016)_Nat_Rev_Genet;Opentarget_genetic_association;Opentarget_textMining;Orphanet;Phenolyser;Radboudumc_:_Exome_panels;SysID_primary_ID_genes	13
PRCD	ENSG00000214140	17	DisGenNet;HPO;Phenolyser	3
PRDM13	ENSG00000112238	6	HPO;OMIM-2022-12-09;Opentarget_textMining	3
PRDM16	ENSG00000142611	1	DisGenNet;HPO;IPA;Phenolyser	4
PRDX1	ENSG00000117450	1	DisGenNet;HPO;Phenolyser	3
PREPL	ENSG00000138078	2	DDG2P;DisGenNet;HPO;Opentarget_textMining;Phenolyser;SysID_primary_ID_genes	6
PRF1	ENSG00000180644	10	DisGenNet;HPO;Phenolyser	3
PRICKLE1	ENSG00000139174	12	DisGenNet;HPO;IPA;Opentarget_genetic_association;Opentarget_textMining;Phenolyser;SysID_candidate_ID_genes	7
PRICKLE2	ENSG00000163637	3	HPO;Opentarget_textMining;Orphanet;Radboudumc_:_Exome_panels;SysID_primary_ID_genes	5
PRKACB	ENSG00000142875	1	Opentarget_genetic_association;Radboudumc_:_Exome_panels;SysID_primary_ID_genes	3
PRKAR1A	ENSG00000108946	17	DDG2P;DisGenNet;Fulgent_:_gene_panel;HPO;Opentarget_textMining;Phenolyser;Radboudumc_:_Exome_panels	7
PRKAR1B	ENSG00000188191	7	Opentarget_genetic_association;Radboudumc_:_Exome_panels;SysID_primary_ID_genes	3
PRKCG	ENSG00000126583	19	DisGenNet;IPA;SysID_primary_ID_genes	3
PRKD1	ENSG00000184304	14	DisGenNet;HPO;Phenolyser	3
PRKN	ENSG00000185345	6	DisGenNet;Opentarget_textMining;SysID_candidate_ID_genes	3
PRKRA	ENSG00000180228	2	DisGenNet;HPO;IPA;Ilyas_M_(2020)_F1000Res;SysID_primary_ID_genes	5
PRL	ENSG00000172179	6	DisGenNet;Opentarget_textMining;Phenolyser	3
PRMT7	ENSG00000132600	16	DDG2P;DisGenNet;Fulgent_:_gene_panel;HPO;IPA;Ilyas_M_(2020)_F1000Res;OMIM-2022-12-09;Opentarget_genetic_association;Opentarget_textMining;Phenolyser;Radboudumc_:_Exome_panels;SysID_primary_ID_genes	12
PRMT9	ENSG00000164169	4	Ilyas_M_(2020)_F1000Res;OMIM-2022-12-09;Opentarget_textMining;SysID_candidate_ID_genes	4
PROC	ENSG00000115718	2	DisGenNet;HPO;Opentarget_textMining;Phenolyser	4
PRODH	ENSG00000100033	22	DisGenNet;HPO;Ilyas_M_(2020)_F1000Res;Vissers_LE_(2016)_Nat_Rev_Genet;Opentarget_textMining;Phenolyser;Radboudumc_:_Exome_panels;SysID_primary_ID_genes	8
PROKR2	ENSG00000101292	20	DisGenNet;HPO;Phenolyser	3
PROM1	ENSG00000007062	4	DisGenNet;HPO;Phenolyser	3
PROP1	ENSG00000175325	5	DisGenNet;Ilyas_M_(2020)_F1000Res;Phenolyser	3
PRORP	ENSG00000100890	14	HPO;Opentarget_textMining;SysID_primary_ID_genes	3
PRPF3	ENSG00000117360	1	DisGenNet;HPO;Phenolyser	3
PRPF31	ENSG00000105618	19	DisGenNet;HPO;Phenolyser	3
PRPF4	ENSG00000136875	9	DisGenNet;HPO;Phenolyser	3
PRPF6	ENSG00000101161	20	DisGenNet;HPO;Phenolyser	3
PRPF8	ENSG00000174231	17	DisGenNet;HPO;Orphanet;Phenolyser;SysID_candidate_ID_genes	5
PRPH2	ENSG00000112619	6	DisGenNet;HPO;Phenolyser	3
PRPS1	ENSG00000147224	X	DDG2P;DisGenNet;Fulgent_:_gene_panel;HPO;Ilyas_M_(2020)_F1000Res;Vissers_LE_(2016)_Nat_Rev_Genet;Opentarget_textMining;Orphanet;Phenolyser;Radboudumc_:_Exome_panels;SysID_primary_ID_genes	11
PRR12	ENSG00000126464	19	DDG2P;DisGenNet;HPO;IPA;Coe_B.P_(2019)_Nat_Genet;Opentarget_genetic_association;Opentarget_textMining;Radboudumc_:_Exome_panels;SysID_primary_ID_genes	9
PRRT2	ENSG00000167371	16	DisGenNet;HPO;Ilyas_M_(2020)_F1000Res;Opentarget_genetic_association;Opentarget_textMining;Phenolyser;SysID_primary_ID_genes	7
PRSS12	ENSG00000164099	4	DDG2P;DisGenNet;Fulgent_:_gene_panel;HPO;IPA;Ilyas_M_(2020)_F1000Res;Vissers_LE_(2016)_Nat_Rev_Genet;OMIM-2022-12-09;Opentarget_genetic_association;Opentarget_textMining;Orphanet;Phenolyser;Radboudumc_:_Exome_panels;SysID_primary_ID_genes	14
PRUNE1	ENSG00000143363	1	DDG2P;DisGenNet;HPO;Opentarget_textMining	4
PSAP	ENSG00000197746	10	Ilyas_M_(2020)_F1000Res;Vissers_LE_(2016)_Nat_Rev_Genet;Radboudumc_:_Exome_panels;SysID_candidate_ID_genes	4
PSAT1	ENSG00000135069	9	DisGenNet;Opentarget_textMining;Radboudumc_:_Exome_panels;SysID_candidate_ID_genes	4
PSEN1	ENSG00000080815	14	DisGenNet;HPO;Vissers_LE_(2016)_Nat_Rev_Genet;Phenolyser	4
PSEN2	ENSG00000143801	1	DisGenNet;HPO;Phenolyser	3
PSMB1	ENSG00000008018	6	HPO;Opentarget_textMining;SysID_candidate_ID_genes	3
PSMB8	ENSG00000204264	6	DDG2P;DisGenNet;HPO;Ilyas_M_(2020)_F1000Res;Phenolyser	5
PSMD12	ENSG00000197170	17	DDG2P;DisGenNet;HPO;IPA;Ilyas_M_(2020)_F1000Res;Opentarget_genetic_association;Opentarget_textMining;Orphanet;Phenolyser;Radboudumc_:_Exome_panels;SysID_primary_ID_genes	11
PSPH	ENSG00000146733	7	DisGenNet;HPO;Ilyas_M_(2020)_F1000Res;Opentarget_genetic_association;Opentarget_textMining;Phenolyser;Radboudumc_:_Exome_panels;SysID_primary_ID_genes	8
PTCH1	ENSG00000185920	9	DDG2P;DisGenNet;HPO;Ilyas_M_(2020)_F1000Res;Vissers_LE_(2016)_Nat_Rev_Genet;Opentarget_genetic_association;Opentarget_textMining;Phenolyser;Radboudumc_:_Exome_panels;SysID_primary_ID_genes	10
PTCH2	ENSG00000117425	1	DisGenNet;HPO;Phenolyser	3
PTCHD1	ENSG00000165186	X	DisGenNet;Fulgent_:_gene_panel;HPO;IPA;Coe_B.P_(2019)_Nat_Genet;Ilyas_M_(2020)_F1000Res;Opentarget_genetic_association;Opentarget_textMining;Orphanet;Phenolyser;Radboudumc_:_Exome_panels;SysID_primary_ID_genes	12
PTDSS1	ENSG00000156471	8	DDG2P;DisGenNet;HPO;Ilyas_M_(2020)_F1000Res;Vissers_LE_(2016)_Nat_Rev_Genet;Opentarget_textMining;Phenolyser;Radboudumc_:_Exome_panels;SysID_primary_ID_genes	9
PTEN	ENSG00000171862	10	DDG2P;DisGenNet;Fulgent_:_gene_panel;HPO;IPA;Ilyas_M_(2020)_F1000Res;Vissers_LE_(2016)_Nat_Rev_Genet;Opentarget_genetic_association;Opentarget_textMining;Orphanet;Phenolyser;Radboudumc_:_Exome_panels;SysID_primary_ID_genes	13
PTF1A	ENSG00000168267	10	Ilyas_M_(2020)_F1000Res;Radboudumc_:_Exome_panels;SysID_candidate_ID_genes	3
PTH2R	ENSG00000144407	2	DisGenNet;IPA;SysID_candidate_ID_genes	3
PTPN11	ENSG00000179295	12	DDG2P;DisGenNet;Fulgent_:_gene_panel;HPO;IPA;Coe_B.P_(2019)_Nat_Genet;Ilyas_M_(2020)_F1000Res;Vissers_LE_(2016)_Nat_Rev_Genet;Opentarget_genetic_association;Opentarget_textMining;Phenolyser;Radboudumc_:_Exome_panels;SysID_primary_ID_genes	13
PTPN23	ENSG00000076201	3	DisGenNet;HPO;IPA;Ilyas_M_(2020)_F1000Res;Opentarget_genetic_association;Opentarget_textMining;Orphanet;Radboudumc_:_Exome_panels;SysID_primary_ID_genes	9
PTPN4	ENSG00000088179	2	IPA;Opentarget_genetic_association;SysID_candidate_ID_genes	3
PTPRD	ENSG00000153707	9	IPA;Opentarget_genetic_association;Opentarget_textMining;SysID_candidate_ID_genes	4
PTPRT	ENSG00000196090	20	IPA;Opentarget_genetic_association;Opentarget_textMining;SysID_candidate_ID_genes	4
PTRH2	ENSG00000141378	17	DisGenNet;HPO;Opentarget_textMining;Phenolyser;Radboudumc_:_Exome_panels;SysID_primary_ID_genes	6
PTRHD1	ENSG00000184924	2	DisGenNet;Opentarget_genetic_association;Opentarget_textMining;Radboudumc_:_Exome_panels;SysID_primary_ID_genes	5
PTS	ENSG00000150787	11	DDG2P;DisGenNet;HPO;Ilyas_M_(2020)_F1000Res;Opentarget_genetic_association;Phenolyser;Radboudumc_:_Exome_panels;SysID_candidate_ID_genes	8
PUF60	ENSG00000179950	8	DisGenNet;HPO;IPA;Coe_B.P_(2019)_Nat_Genet;Ilyas_M_(2020)_F1000Res;Vissers_LE_(2016)_Nat_Rev_Genet;Opentarget_genetic_association;Opentarget_textMining;Orphanet;Radboudumc_:_Exome_panels;SysID_primary_ID_genes	11
PUM1	ENSG00000134644	1	DisGenNet;HPO;IPA;Opentarget_genetic_association;Opentarget_textMining;Phenolyser;Radboudumc_:_Exome_panels;SysID_primary_ID_genes	8
PURA	ENSG00000185129	5	DDG2P;DisGenNet;Fulgent_:_gene_panel;HPO;IPA;Coe_B.P_(2019)_Nat_Genet;Ilyas_M_(2020)_F1000Res;Vissers_LE_(2016)_Nat_Rev_Genet;Opentarget_genetic_association;Opentarget_textMining;Phenolyser;Radboudumc_:_Exome_panels;SysID_primary_ID_genes	13
PUS1	ENSG00000177192	12	DisGenNet;HPO;Ilyas_M_(2020)_F1000Res;Vissers_LE_(2016)_Nat_Rev_Genet;Opentarget_genetic_association;Phenolyser;Radboudumc_:_Exome_panels;SysID_primary_ID_genes	8
PUS3	ENSG00000110060	11	DisGenNet;HPO;IPA;Ilyas_M_(2020)_F1000Res;Opentarget_genetic_association;Opentarget_textMining;Orphanet;Phenolyser;Radboudumc_:_Exome_panels;SysID_primary_ID_genes	10
PUS7	ENSG00000091127	7	DDG2P;DisGenNet;HPO;IPA;OMIM-2022-12-09;Opentarget_genetic_association;Opentarget_textMining;Orphanet;Radboudumc_:_Exome_panels;SysID_primary_ID_genes	10
PWAR1	ENSG00000279050	15	DisGenNet;HPO;Opentarget_textMining;Phenolyser	4
PWRN1	ENSG00000259905	15	DisGenNet;HPO;Phenolyser	3
PYCR1	ENSG00000183010	17	DisGenNet;Fulgent_:_gene_panel;HPO;IPA;Ilyas_M_(2020)_F1000Res;Vissers_LE_(2016)_Nat_Rev_Genet;Opentarget_genetic_association;Opentarget_textMining;Phenolyser;Radboudumc_:_Exome_panels;SysID_primary_ID_genes	11
PYCR2	ENSG00000143811	1	DisGenNet;HPO;Ilyas_M_(2020)_F1000Res;Opentarget_genetic_association;Phenolyser;Radboudumc_:_Exome_panels;SysID_primary_ID_genes	7
QARS1	ENSG00000172053	3	Opentarget_genetic_association;Opentarget_textMining;Orphanet;Radboudumc_:_Exome_panels;SysID_primary_ID_genes	5
QDPR	ENSG00000151552	4	DDG2P;DisGenNet;HPO;Ilyas_M_(2020)_F1000Res;Opentarget_textMining;Phenolyser;Radboudumc_:_Exome_panels;SysID_candidate_ID_genes	8
QKI	ENSG00000112531	6	DDG2P;DisGenNet;Opentarget_genetic_association;Opentarget_textMining	4
QRICH1	ENSG00000198218	3	DisGenNet;HPO;IPA;Coe_B.P_(2019)_Nat_Genet;Ilyas_M_(2020)_F1000Res;Opentarget_genetic_association;Opentarget_textMining;Orphanet;Phenolyser;Radboudumc_:_Exome_panels;SysID_primary_ID_genes	11
RAB11A	ENSG00000103769	15	DDG2P;DisGenNet;HPO;Coe_B.P_(2019)_Nat_Genet;Opentarget_genetic_association;Opentarget_textMining;Orphanet;SysID_primary_ID_genes	8
RAB11B	ENSG00000185236	19	DDG2P;DisGenNet;Ilyas_M_(2020)_F1000Res;Opentarget_genetic_association;Radboudumc_:_Exome_panels;SysID_primary_ID_genes	6
RAB18	ENSG00000099246	10	DisGenNet;HPO;IPA;Ilyas_M_(2020)_F1000Res;Vissers_LE_(2016)_Nat_Rev_Genet;Phenolyser;Radboudumc_:_Exome_panels;SysID_primary_ID_genes	8
RAB23	ENSG00000112210	6	DDG2P;DisGenNet;HPO;Ilyas_M_(2020)_F1000Res;Opentarget_textMining;Phenolyser;Radboudumc_:_Exome_panels;SysID_primary_ID_genes	8
RAB27A	ENSG00000069974	15	Ilyas_M_(2020)_F1000Res;Vissers_LE_(2016)_Nat_Rev_Genet;Radboudumc_:_Exome_panels;SysID_primary_ID_genes	4
RAB39B	ENSG00000155961	X	AutDB;DDG2P;DisGenNet;Fulgent_:_gene_panel;HPO;IPA;Ilyas_M_(2020)_F1000Res;Vissers_LE_(2016)_Nat_Rev_Genet;OMIM-2022-12-09;Opentarget_textMining;Orphanet;Phenolyser;Radboudumc_:_Exome_panels;SysID_primary_ID_genes	14
RAB3GAP1	ENSG00000115839	2	DDG2P;DisGenNet;HPO;IPA;Ilyas_M_(2020)_F1000Res;Vissers_LE_(2016)_Nat_Rev_Genet;Opentarget_genetic_association;Opentarget_textMining;Orphanet;Phenolyser;Radboudumc_:_Exome_panels;SysID_primary_ID_genes	12
RAB3GAP2	ENSG00000118873	1	DDG2P;DisGenNet;HPO;IPA;Ilyas_M_(2020)_F1000Res;Vissers_LE_(2016)_Nat_Rev_Genet;Opentarget_textMining;Orphanet;Phenolyser;Radboudumc_:_Exome_panels;SysID_primary_ID_genes	11
RAB40AL	ENSG00000102128	X	DisGenNet;IPA;Vissers_LE_(2016)_Nat_Rev_Genet;Opentarget_textMining;Phenolyser;SysID_candidate_ID_genes	6
RAB5IF	ENSG00000101084	20	HPO;OMIM-2022-12-09;Opentarget_genetic_association	3
RABL6	ENSG00000196642	9	DisGenNet;IPA;Ilyas_M_(2020)_F1000Res;SysID_primary_ID_genes	4
RAC1	ENSG00000136238	7	DDG2P;DisGenNet;HPO;IPA;Coe_B.P_(2019)_Nat_Genet;Ilyas_M_(2020)_F1000Res;OMIM-2022-12-09;Opentarget_genetic_association;Opentarget_textMining;Orphanet;Phenolyser;Radboudumc_:_Exome_panels;SysID_primary_ID_genes	13
RAC3	ENSG00000169750	17	DDG2P;DisGenNet;HPO;Opentarget_genetic_association;Orphanet;Radboudumc_:_Exome_panels;SysID_primary_ID_genes	7
RAD21	ENSG00000164754	8	DisGenNet;HPO;Ilyas_M_(2020)_F1000Res;Vissers_LE_(2016)_Nat_Rev_Genet;Opentarget_textMining;Phenolyser;Radboudumc_:_Exome_panels;SysID_primary_ID_genes	8
RAD50	ENSG00000113522	5	DDG2P;DisGenNet;HPO;Opentarget_textMining;Phenolyser;SysID_candidate_ID_genes	6
RAD51	ENSG00000051180	15	DisGenNet;HPO;Opentarget_textMining;Phenolyser	4
RAD51C	ENSG00000108384	17	DisGenNet;HPO;Phenolyser	3
RAF1	ENSG00000132155	3	DisGenNet;HPO;Ilyas_M_(2020)_F1000Res;Vissers_LE_(2016)_Nat_Rev_Genet;Phenolyser;Radboudumc_:_Exome_panels;SysID_primary_ID_genes	7
RAI1	ENSG00000108557	17	DDG2P;DisGenNet;Fulgent_:_gene_panel;HPO;IPA;Ilyas_M_(2020)_F1000Res;Vissers_LE_(2016)_Nat_Rev_Genet;Opentarget_genetic_association;Opentarget_textMining;Phenolyser;Radboudumc_:_Exome_panels;SysID_primary_ID_genes	12
RALA	ENSG00000006451	7	DisGenNet;HPO;IPA;Opentarget_genetic_association;Opentarget_textMining;Radboudumc_:_Exome_panels;SysID_primary_ID_genes	7
RALGAPA1	ENSG00000174373	14	DisGenNet;Radboudumc_:_Exome_panels;SysID_primary_ID_genes	3
RALGDS	ENSG00000160271	9	DisGenNet;Ilyas_M_(2020)_F1000Res;SysID_candidate_ID_genes	3
RANBP2	ENSG00000153201	2	DisGenNet;HPO;SysID_candidate_ID_genes	3
RARB	ENSG00000077092	3	DisGenNet;HPO;Ilyas_M_(2020)_F1000Res;Opentarget_textMining;Phenolyser;Radboudumc_:_Exome_panels;SysID_primary_ID_genes	7
RARS1	ENSG00000113643	5	DisGenNet;HPO;Radboudumc_:_Exome_panels;SysID_primary_ID_genes	4
RARS2	ENSG00000146282	6	IPA;Ilyas_M_(2020)_F1000Res;Vissers_LE_(2016)_Nat_Rev_Genet;Opentarget_genetic_association;Opentarget_textMining;Phenolyser;Radboudumc_:_Exome_panels;SysID_primary_ID_genes	8
RASA1	ENSG00000145715	5	DisGenNet;Ilyas_M_(2020)_F1000Res;Phenolyser	3
RB1	ENSG00000139687	13	DisGenNet;HPO;Opentarget_textMining;Phenolyser	4
RBBP8	ENSG00000101773	18	DDG2P;DisGenNet;Fulgent_:_gene_panel;HPO;IPA;Ilyas_M_(2020)_F1000Res;Opentarget_textMining;Phenolyser;Radboudumc_:_Exome_panels;SysID_primary_ID_genes	10
RBFOX1	ENSG00000078328	16	DisGenNet;Fulgent_:_gene_panel;IPA;Opentarget_textMining;Radboudumc_:_Exome_panels;SysID_candidate_ID_genes	6
RBL2	ENSG00000103479	16	DisGenNet;Opentarget_textMining;SysID_primary_ID_genes	3
RBM10	ENSG00000182872	X	DisGenNet;Fulgent_:_gene_panel;HPO;Ilyas_M_(2020)_F1000Res;Vissers_LE_(2016)_Nat_Rev_Genet;Opentarget_genetic_association;Opentarget_textMining;Radboudumc_:_Exome_panels;SysID_primary_ID_genes	9
RBM28	ENSG00000106344	7	DDG2P;DisGenNet;HPO;Ilyas_M_(2020)_F1000Res;Vissers_LE_(2016)_Nat_Rev_Genet;Phenolyser;Radboudumc_:_Exome_panels;SysID_primary_ID_genes	8
RBM8A	ENSG00000265241	1	DisGenNet;HPO;IPA;Opentarget_textMining;Phenolyser	5
RBMX	ENSG00000147274	X	DisGenNet;HPO;IPA;OMIM-2022-12-09;Phenolyser;SysID_candidate_ID_genes	6
RBP3	ENSG00000265203	10	DisGenNet;HPO;Phenolyser	3
RBPJ	ENSG00000168214	4	DisGenNet;HPO;Ilyas_M_(2020)_F1000Res;Opentarget_textMining;Phenolyser;Radboudumc_:_Exome_panels;SysID_primary_ID_genes	7
RCAN1	ENSG00000159200	21	DisGenNet;Opentarget_textMining;Phenolyser;SysID_candidate_ID_genes	4
RCBTB1	ENSG00000136144	13	HPO;Radboudumc_:_Exome_panels;SysID_primary_ID_genes	3
RD3	ENSG00000198570	1	DisGenNet;HPO;Phenolyser	3
RDH11	ENSG00000072042	14	HPO;Orphanet;SysID_candidate_ID_genes	3
RDH12	ENSG00000139988	14	DisGenNet;HPO;Phenolyser	3
RECQL4	ENSG00000160957	8	DDG2P;DisGenNet;HPO;Opentarget_textMining;Phenolyser;Radboudumc_:_Exome_panels	6
REEP6	ENSG00000115255	19	DisGenNet;HPO;Phenolyser	3
RELN	ENSG00000189056	7	DisGenNet;Fulgent_:_gene_panel;HPO;IPA;Ilyas_M_(2020)_F1000Res;Vissers_LE_(2016)_Nat_Rev_Genet;Opentarget_genetic_association;Opentarget_textMining;Phenolyser;Radboudumc_:_Exome_panels;SysID_primary_ID_genes	11
RERE	ENSG00000142599	1	DisGenNet;HPO;IPA;Ilyas_M_(2020)_F1000Res;Opentarget_genetic_association;Opentarget_textMining;Phenolyser;Radboudumc_:_Exome_panels;SysID_primary_ID_genes	9
RET	ENSG00000165731	10	DDG2P;DisGenNet;HPO;Phenolyser	4
RFC2	ENSG00000049541	7	DisGenNet;HPO;Phenolyser	3
RFT1	ENSG00000163933	3	DisGenNet;HPO;Ilyas_M_(2020)_F1000Res;Vissers_LE_(2016)_Nat_Rev_Genet;Phenolyser;Radboudumc_:_Exome_panels;SysID_primary_ID_genes	7
RFWD3	ENSG00000168411	16	DisGenNet;HPO;Phenolyser	3
RFX3	ENSG00000080298	9	Opentarget_genetic_association;Radboudumc_:_Exome_panels;SysID_primary_ID_genes	3
RFX4	ENSG00000111783	12	Opentarget_genetic_association;Radboudumc_:_Exome_panels;SysID_primary_ID_genes	3
RFX7	ENSG00000181827	15	Opentarget_genetic_association;Radboudumc_:_Exome_panels;SysID_primary_ID_genes	3
RGMA	ENSG00000182175	15	DisGenNet;Opentarget_textMining;SysID_candidate_ID_genes	3
RGR	ENSG00000148604	10	DisGenNet;HPO;Phenolyser;SysID_candidate_ID_genes	4
RGS7	ENSG00000182901	1	DisGenNet;Ilyas_M_(2020)_F1000Res;SysID_candidate_ID_genes	3
RHO	ENSG00000163914	3	DisGenNet;HPO;Opentarget_textMining;Phenolyser	4
RHOBTB2	ENSG00000008853	8	DDG2P;DisGenNet;HPO;IPA;Ilyas_M_(2020)_F1000Res;Opentarget_genetic_association;Phenolyser;Radboudumc_:_Exome_panels;SysID_primary_ID_genes	9
RIC1	ENSG00000107036	9	HPO;IPA;Opentarget_genetic_association;Radboudumc_:_Exome_panels;SysID_primary_ID_genes	5
RIPK4	ENSG00000183421	21	DisGenNet;HPO;Phenolyser	3
RIPPLY2	ENSG00000203877	6	DisGenNet;HPO;Phenolyser	3
RIT1	ENSG00000143622	1	DisGenNet;Fulgent_:_gene_panel;HPO;Ilyas_M_(2020)_F1000Res;Vissers_LE_(2016)_Nat_Rev_Genet;Phenolyser;Radboudumc_:_Exome_panels;SysID_primary_ID_genes	8
RLBP1	ENSG00000140522	15	DisGenNet;HPO;Phenolyser	3
RLIM	ENSG00000131263	X	DDG2P;DisGenNet;HPO;IPA;Ilyas_M_(2020)_F1000Res;Opentarget_genetic_association;Opentarget_textMining;Orphanet;Phenolyser;Radboudumc_:_Exome_panels;SysID_primary_ID_genes	11
RMND1	ENSG00000155906	6	Ilyas_M_(2020)_F1000Res;Vissers_LE_(2016)_Nat_Rev_Genet;Radboudumc_:_Exome_panels;SysID_primary_ID_genes	4
RMRP	ENSG00000277027	9	DisGenNet;HPO;Ilyas_M_(2020)_F1000Res;Vissers_LE_(2016)_Nat_Rev_Genet;Phenolyser;Radboudumc_:_Exome_panels;SysID_primary_ID_genes	7
RNASEH2A	ENSG00000104889	19	DisGenNet;HPO;Ilyas_M_(2020)_F1000Res;Vissers_LE_(2016)_Nat_Rev_Genet;Phenolyser;Radboudumc_:_Exome_panels;SysID_primary_ID_genes	7
RNASEH2B	ENSG00000136104	13	DisGenNet;HPO;Ilyas_M_(2020)_F1000Res;Vissers_LE_(2016)_Nat_Rev_Genet;Phenolyser;Radboudumc_:_Exome_panels;SysID_primary_ID_genes	7
RNASEH2C	ENSG00000172922	11	DisGenNet;HPO;Ilyas_M_(2020)_F1000Res;Vissers_LE_(2016)_Nat_Rev_Genet;Phenolyser;Radboudumc_:_Exome_panels;SysID_primary_ID_genes	7
RNASET2	ENSG00000026297	6	DisGenNet;Ilyas_M_(2020)_F1000Res;Vissers_LE_(2016)_Nat_Rev_Genet;Opentarget_genetic_association;Radboudumc_:_Exome_panels;SysID_primary_ID_genes	6
RNF113A	ENSG00000125352	X	DisGenNet;HPO;IPA;Phenolyser;Radboudumc_:_Exome_panels;SysID_primary_ID_genes	6
RNF125	ENSG00000101695	18	DDG2P;DisGenNet;HPO;IPA;Ilyas_M_(2020)_F1000Res;Opentarget_genetic_association;Opentarget_textMining;Phenolyser;Radboudumc_:_Exome_panels;SysID_primary_ID_genes	10
RNF13	ENSG00000082996	3	DisGenNet;HPO;Opentarget_genetic_association;Radboudumc_:_Exome_panels;SysID_primary_ID_genes	5
RNF135	ENSG00000181481	17	DisGenNet;HPO;IPA;Ilyas_M_(2020)_F1000Res;Phenolyser;SysID_candidate_ID_genes	6
RNF168	ENSG00000163961	3	DDG2P;DisGenNet;HPO;Opentarget_textMining;Phenolyser	5
RNF2	ENSG00000121481	1	HPO;Opentarget_genetic_association;Orphanet;Radboudumc_:_Exome_panels;SysID_candidate_ID_genes	5
RNF213	ENSG00000173821	17	DisGenNet;HPO;Phenolyser	3
RNF220	ENSG00000187147	1	HPO;Opentarget_genetic_association;Opentarget_textMining;Radboudumc_:_Exome_panels;SysID_primary_ID_genes	5
RNU4ATAC	ENSG00000264229	2	DDG2P;DisGenNet;HPO;Ilyas_M_(2020)_F1000Res;Phenolyser;Radboudumc_:_Exome_panels;SysID_primary_ID_genes	7
ROBO1	ENSG00000169855	3	DisGenNet;HPO;IPA;Opentarget_genetic_association;Opentarget_textMining;Phenolyser;SysID_candidate_ID_genes	7
ROGDI	ENSG00000067836	16	DDG2P;DisGenNet;HPO;IPA;Ilyas_M_(2020)_F1000Res;Vissers_LE_(2016)_Nat_Rev_Genet;Phenolyser;Radboudumc_:_Exome_panels;SysID_primary_ID_genes	9
ROM1	ENSG00000149489	11	DisGenNet;HPO;Phenolyser	3
ROR2	ENSG00000169071	9	DDG2P;DisGenNet;HPO;Ilyas_M_(2020)_F1000Res;Phenolyser;Radboudumc_:_Exome_panels	6
RORA	ENSG00000069667	15	DDG2P;DisGenNet;Fulgent_:_gene_panel;HPO;IPA;Ilyas_M_(2020)_F1000Res;OMIM-2022-12-09;Opentarget_genetic_association;Opentarget_textMining;Phenolyser;Radboudumc_:_Exome_panels;SysID_primary_ID_genes	12
RORB	ENSG00000198963	9	DisGenNet;Opentarget_textMining;SysID_candidate_ID_genes	3
RP1	ENSG00000104237	8	DisGenNet;HPO;Phenolyser	3
RP2	ENSG00000102218	X	DisGenNet;HPO;Phenolyser	3
RP9	ENSG00000164610	7	DisGenNet;HPO;Phenolyser	3
RPE65	ENSG00000116745	1	DisGenNet;HPO;Ilyas_M_(2020)_F1000Res;Phenolyser	4
RPGR	ENSG00000156313	X	DisGenNet;HPO;Phenolyser	3
RPGRIP1	ENSG00000092200	14	DisGenNet;HPO;Ilyas_M_(2020)_F1000Res;Phenolyser;SysID_candidate_ID_genes	5
RPGRIP1L	ENSG00000103494	16	DDG2P;DisGenNet;Fulgent_:_gene_panel;HPO;IPA;Ilyas_M_(2020)_F1000Res;Vissers_LE_(2016)_Nat_Rev_Genet;Phenolyser;Radboudumc_:_Exome_panels;SysID_primary_ID_genes	10
RPIA	ENSG00000153574	2	DisGenNet;HPO;Opentarget_textMining;Phenolyser	4
RPL10	ENSG00000147403	X	DisGenNet;Fulgent_:_gene_panel;HPO;IPA;Ilyas_M_(2020)_F1000Res;Vissers_LE_(2016)_Nat_Rev_Genet;OMIM-2022-12-09;Opentarget_textMining;Orphanet;Phenolyser;Radboudumc_:_Exome_panels;SysID_primary_ID_genes	12
RPL35A	ENSG00000182899	3	DisGenNet;HPO;Phenolyser	3
RPS19	ENSG00000105372	19	HPO;Ilyas_M_(2020)_F1000Res;Phenolyser;Radboudumc_:_Exome_panels	4
RPS23	ENSG00000186468	5	DDG2P;DisGenNet;Ilyas_M_(2020)_F1000Res;Phenolyser;SysID_candidate_ID_genes	5
RPS28	ENSG00000233927	19	DisGenNet;HPO;Phenolyser	3
RPS6KA3	ENSG00000177189	X	DDG2P;DisGenNet;Fulgent_:_gene_panel;HPO;IPA;Ilyas_M_(2020)_F1000Res;Vissers_LE_(2016)_Nat_Rev_Genet;OMIM-2022-12-09;Opentarget_genetic_association;Opentarget_textMining;Orphanet;Phenolyser;Radboudumc_:_Exome_panels;SysID_primary_ID_genes	14
RREB1	ENSG00000124782	6	DisGenNet;HPO;Opentarget_textMining;Phenolyser;SysID_candidate_ID_genes	5
RRM2B	ENSG00000048392	8	DisGenNet;HPO;Ilyas_M_(2020)_F1000Res;Opentarget_genetic_association;Phenolyser;Radboudumc_:_Exome_panels;SysID_primary_ID_genes	7
RSPRY1	ENSG00000159579	16	DisGenNet;HPO;IPA;Opentarget_textMining;Orphanet;Phenolyser;Radboudumc_:_Exome_panels;SysID_primary_ID_genes	8
RSRC1	ENSG00000174891	3	DisGenNet;HPO;IPA;OMIM-2022-12-09;Opentarget_textMining;Orphanet;Radboudumc_:_Exome_panels;SysID_primary_ID_genes	8
RTEL1	ENSG00000258366	20	DisGenNet;HPO;Ilyas_M_(2020)_F1000Res;Vissers_LE_(2016)_Nat_Rev_Genet;Phenolyser;Radboudumc_:_Exome_panels;SysID_primary_ID_genes	7
RTL1	ENSG00000254656	14	DisGenNet;HPO;Opentarget_textMining	3
RTN4IP1	ENSG00000130347	6	DisGenNet;HPO;IPA;Ilyas_M_(2020)_F1000Res;OMIM-2022-12-09;Phenolyser;Radboudumc_:_Exome_panels;SysID_primary_ID_genes	8
RTTN	ENSG00000176225	18	DDG2P;DisGenNet;HPO;IPA;Ilyas_M_(2020)_F1000Res;Opentarget_genetic_association;Opentarget_textMining;Phenolyser;Radboudumc_:_Exome_panels;SysID_primary_ID_genes	10
RUBCN	ENSG00000145016	3	DisGenNet;HPO;Opentarget_genetic_association;Orphanet;Radboudumc_:_Exome_panels;SysID_candidate_ID_genes	6
RUSC2	ENSG00000198853	9	DisGenNet;HPO;IPA;OMIM-2022-12-09;Opentarget_textMining;Phenolyser;Radboudumc_:_Exome_panels;SysID_primary_ID_genes	8
RXYLT1	ENSG00000118600	12	DisGenNet;HPO;IPA;Opentarget_textMining;Radboudumc_:_Exome_panels;SysID_candidate_ID_genes	6
RYR1	ENSG00000196218	19	DisGenNet;HPO;IPA;Phenolyser	4
RYR2	ENSG00000198626	1	DDG2P;DisGenNet;IPA;Coe_B.P_(2019)_Nat_Genet;Opentarget_textMining;SysID_candidate_ID_genes	6
SACS	ENSG00000151835	13	DDG2P;DisGenNet;Fulgent_:_gene_panel;HPO;Ilyas_M_(2020)_F1000Res;Opentarget_genetic_association;Opentarget_textMining;Phenolyser;SysID_candidate_ID_genes	9
SAG	ENSG00000130561	2	DisGenNet;HPO;Phenolyser	3
SALL1	ENSG00000103449	16	DDG2P;DisGenNet;HPO;Ilyas_M_(2020)_F1000Res;Vissers_LE_(2016)_Nat_Rev_Genet;Phenolyser;Radboudumc_:_Exome_panels;SysID_primary_ID_genes	8
SALL4	ENSG00000101115	20	DisGenNet;HPO;Opentarget_textMining	3
SAMD12	ENSG00000177570	8	DisGenNet;HPO;Phenolyser	3
SAMD9	ENSG00000205413	7	DisGenNet;HPO;Opentarget_textMining;Phenolyser	4
SAMHD1	ENSG00000101347	20	Fulgent_:_gene_panel;HPO;Ilyas_M_(2020)_F1000Res;Phenolyser;Radboudumc_:_Exome_panels;SysID_primary_ID_genes	6
SAR1B	ENSG00000152700	5	DisGenNet;HPO;Phenolyser;SysID_candidate_ID_genes	4
SARS1	ENSG00000031698	1	DisGenNet;HPO;Orphanet;Radboudumc_:_Exome_panels;SysID_candidate_ID_genes	5
SARS2	ENSG00000104835	19	DisGenNet;Opentarget_textMining;SysID_candidate_ID_genes	3
SASS6	ENSG00000156876	1	DisGenNet;HPO;Phenolyser;SysID_primary_ID_genes	4
SATB1	ENSG00000182568	3	HPO;IPA;Opentarget_genetic_association;Orphanet;Radboudumc_:_Exome_panels;SysID_primary_ID_genes	6
SATB2	ENSG00000119042	2	DDG2P;DisGenNet;Fulgent_:_gene_panel;HPO;IPA;Coe_B.P_(2019)_Nat_Genet;Ilyas_M_(2020)_F1000Res;Vissers_LE_(2016)_Nat_Rev_Genet;Opentarget_genetic_association;Opentarget_textMining;Phenolyser;Radboudumc_:_Exome_panels;SysID_primary_ID_genes	13
SBDS	ENSG00000126524	7	DisGenNet;HPO;IPA;Ilyas_M_(2020)_F1000Res;Opentarget_genetic_association;Opentarget_textMining;Phenolyser;Radboudumc_:_Exome_panels;SysID_primary_ID_genes	9
SBF1	ENSG00000100241	22	HPO;IPA;Phenolyser;SysID_candidate_ID_genes	4
SC5D	ENSG00000109929	11	DDG2P;DisGenNet;HPO;Ilyas_M_(2020)_F1000Res;Opentarget_genetic_association;Phenolyser;Radboudumc_:_Exome_panels;SysID_primary_ID_genes	8
SCAF4	ENSG00000156304	21	Opentarget_genetic_association;Radboudumc_:_Exome_panels;SysID_primary_ID_genes	3
SCAMP4	ENSG00000227500	19	DisGenNet;Ilyas_M_(2020)_F1000Res;Opentarget_genetic_association	3
SCAMP5	ENSG00000198794	15	DisGenNet;IPA;Opentarget_genetic_association;Radboudumc_:_Exome_panels;SysID_primary_ID_genes	5
SCAPER	ENSG00000140386	15	DisGenNet;HPO;IPA;Ilyas_M_(2020)_F1000Res;OMIM-2022-12-09;Opentarget_genetic_association;Opentarget_textMining;Phenolyser;Radboudumc_:_Exome_panels;SysID_primary_ID_genes	10
SCARB2	ENSG00000138760	4	DisGenNet;HPO;Phenolyser	3
SCARF2	ENSG00000244486	22	DisGenNet;IPA;Ilyas_M_(2020)_F1000Res;Opentarget_textMining	4
SCN1A	ENSG00000144285	2	DisGenNet;Fulgent_:_gene_panel;HPO;IPA;Ilyas_M_(2020)_F1000Res;Vissers_LE_(2016)_Nat_Rev_Genet;Opentarget_genetic_association;Opentarget_textMining;Phenolyser;Radboudumc_:_Exome_panels;SysID_primary_ID_genes	11
SCN1B	ENSG00000105711	19	HPO;IPA;Opentarget_textMining;Radboudumc_:_Exome_panels;SysID_primary_ID_genes	5
SCN2A	ENSG00000136531	2	DisGenNet;Fulgent_:_gene_panel;HPO;IPA;Coe_B.P_(2019)_Nat_Genet;Ilyas_M_(2020)_F1000Res;Vissers_LE_(2016)_Nat_Rev_Genet;Opentarget_genetic_association;Opentarget_textMining;Radboudumc_:_Exome_panels;SysID_primary_ID_genes	11
SCN3A	ENSG00000153253	2	DisGenNet;HPO;IPA;Ilyas_M_(2020)_F1000Res;Opentarget_genetic_association;Opentarget_textMining;Radboudumc_:_Exome_panels;SysID_primary_ID_genes	8
SCN4A	ENSG00000007314	17	DisGenNet;HPO;IPA;Ilyas_M_(2020)_F1000Res;Phenolyser	5
SCN8A	ENSG00000196876	12	DDG2P;DisGenNet;Fulgent_:_gene_panel;HPO;IPA;Coe_B.P_(2019)_Nat_Genet;Ilyas_M_(2020)_F1000Res;Vissers_LE_(2016)_Nat_Rev_Genet;Opentarget_genetic_association;Opentarget_textMining;Orphanet;Phenolyser;Radboudumc_:_Exome_panels;SysID_primary_ID_genes	14
SCN9A	ENSG00000169432	2	DisGenNet;Opentarget_genetic_association;Opentarget_textMining	3
SCO1	ENSG00000133028	17	DDG2P;DisGenNet;Ilyas_M_(2020)_F1000Res;Phenolyser;Radboudumc_:_Exome_panels;SysID_candidate_ID_genes	6
SCO2	ENSG00000284194	22	DisGenNet;HPO;Ilyas_M_(2020)_F1000Res;Vissers_LE_(2016)_Nat_Rev_Genet;Phenolyser;Radboudumc_:_Exome_panels;SysID_primary_ID_genes	7
SCUBE3	ENSG00000146197	6	HPO;Radboudumc_:_Exome_panels;SysID_candidate_ID_genes	3
SCYL1	ENSG00000142186	11	DisGenNet;HPO;Opentarget_textMining;Phenolyser;Radboudumc_:_Exome_panels;SysID_primary_ID_genes	6
SDCCAG8	ENSG00000054282	1	DDG2P;DisGenNet;Fulgent_:_gene_panel;HPO;Ilyas_M_(2020)_F1000Res;Opentarget_genetic_association;Opentarget_textMining;Phenolyser;Radboudumc_:_Exome_panels;SysID_primary_ID_genes	10
SDHA	ENSG00000073578	5	DDG2P;DisGenNet;HPO;Ilyas_M_(2020)_F1000Res;Vissers_LE_(2016)_Nat_Rev_Genet;Phenolyser;Radboudumc_:_Exome_panels;SysID_primary_ID_genes	8
SDHB	ENSG00000117118	1	DisGenNet;HPO;Phenolyser;SysID_primary_ID_genes	4
SDHC	ENSG00000143252	1	DisGenNet;HPO;Phenolyser	3
SDHD	ENSG00000204370	11	DisGenNet;HPO;Phenolyser;SysID_primary_ID_genes	4
SEC23B	ENSG00000101310	20	DisGenNet;HPO;Ilyas_M_(2020)_F1000Res;Phenolyser	4
SEC24C	ENSG00000176986	10	DisGenNet;HPO;Phenolyser	3
SEC24D	ENSG00000150961	4	DisGenNet;HPO;Phenolyser	3
SELENOI	ENSG00000138018	2	DDG2P;DisGenNet;HPO;Opentarget_textMining;SysID_candidate_ID_genes	5
SEMA3C	ENSG00000075223	7	DisGenNet;HPO;IPA;Phenolyser	4
SEMA3D	ENSG00000153993	7	DisGenNet;HPO;Phenolyser	3
SEMA3E	ENSG00000170381	7	DisGenNet;HPO;Phenolyser;Radboudumc_:_Exome_panels;SysID_candidate_ID_genes	5
SEMA4A	ENSG00000196189	1	DisGenNet;HPO;Phenolyser	3
SEMA5A	ENSG00000112902	5	DisGenNet;HPO;IPA;Opentarget_genetic_association;Opentarget_textMining;Phenolyser;SysID_candidate_ID_genes	7
SEMA6B	ENSG00000167680	19	HPO;IPA;Opentarget_genetic_association;SysID_primary_ID_genes	4
SEPSECS	ENSG00000109618	4	HPO;Phenolyser;Radboudumc_:_Exome_panels;SysID_primary_ID_genes	4
SERAC1	ENSG00000122335	6	DisGenNet;HPO;Ilyas_M_(2020)_F1000Res;Vissers_LE_(2016)_Nat_Rev_Genet;Opentarget_textMining;Phenolyser;Radboudumc_:_Exome_panels;SysID_primary_ID_genes	8
SET	ENSG00000119335	9	DDG2P;DisGenNet;HPO;IPA;Coe_B.P_(2019)_Nat_Genet;Ilyas_M_(2020)_F1000Res;OMIM-2022-12-09;Opentarget_genetic_association;Opentarget_textMining;Orphanet;Phenolyser;Radboudumc_:_Exome_panels;SysID_primary_ID_genes	13
SETBP1	ENSG00000152217	18	AutDB;DDG2P;DisGenNet;Fulgent_:_gene_panel;HPO;IPA;Coe_B.P_(2019)_Nat_Genet;Ilyas_M_(2020)_F1000Res;Vissers_LE_(2016)_Nat_Rev_Genet;OMIM-2022-12-09;Opentarget_genetic_association;Opentarget_textMining;Orphanet;Phenolyser;Radboudumc_:_Exome_panels;SysID_primary_ID_genes	16
SETD1A	ENSG00000099381	16	DDG2P;DisGenNet;HPO;IPA;Ilyas_M_(2020)_F1000Res;Opentarget_genetic_association;Opentarget_textMining;Orphanet;Radboudumc_:_Exome_panels;SysID_primary_ID_genes	10
SETD1B	ENSG00000139718	12	DDG2P;DisGenNet;HPO;IPA;Coe_B.P_(2019)_Nat_Genet;Ilyas_M_(2020)_F1000Res;OMIM-2022-12-09;Opentarget_textMining;Orphanet;Radboudumc_:_Exome_panels;SysID_primary_ID_genes	11
SETD2	ENSG00000181555	3	DDG2P;DisGenNet;HPO;IPA;Coe_B.P_(2019)_Nat_Genet;Ilyas_M_(2020)_F1000Res;OMIM-2022-12-09;Opentarget_genetic_association;Opentarget_textMining;Phenolyser;Radboudumc_:_Exome_panels;SysID_primary_ID_genes	12
SETD5	ENSG00000168137	3	AutDB;DisGenNet;Fulgent_:_gene_panel;HPO;IPA;Coe_B.P_(2019)_Nat_Genet;Ilyas_M_(2020)_F1000Res;Vissers_LE_(2016)_Nat_Rev_Genet;OMIM-2022-12-09;Opentarget_genetic_association;Opentarget_textMining;Orphanet;Phenolyser;Radboudumc_:_Exome_panels;SysID_primary_ID_genes	15
SFXN4	ENSG00000183605	10	DisGenNet;HPO;Ilyas_M_(2020)_F1000Res;Phenolyser;Radboudumc_:_Exome_panels;SysID_primary_ID_genes	6
SGPL1	ENSG00000166224	10	Ilyas_M_(2020)_F1000Res;Radboudumc_:_Exome_panels;SysID_primary_ID_genes	3
SGSH	ENSG00000181523	17	DDG2P;DisGenNet;Fulgent_:_gene_panel;HPO;IPA;Ilyas_M_(2020)_F1000Res;Vissers_LE_(2016)_Nat_Rev_Genet;Opentarget_genetic_association;Opentarget_textMining;Phenolyser;Radboudumc_:_Exome_panels;SysID_primary_ID_genes	12
SH2B1	ENSG00000178188	16	DisGenNet;HPO;Opentarget_textMining;Phenolyser	4
SH3BP4	ENSG00000130147	2	DisGenNet;Opentarget_textMining;Phenolyser	3
SHANK1	ENSG00000161681	19	DDG2P;DisGenNet;Ilyas_M_(2020)_F1000Res;Mireia_Coll-TanÃ©_(2019)_Dis_Model_Mech;Opentarget_genetic_association;Opentarget_textMining;SysID_candidate_ID_genes	7
SHANK2	ENSG00000162105	11	DisGenNet;Fulgent_:_gene_panel;IPA;Ilyas_M_(2020)_F1000Res;Mireia_Coll-TanÃ©_(2019)_Dis_Model_Mech;Vissers_LE_(2016)_Nat_Rev_Genet;Opentarget_genetic_association;Opentarget_textMining;Phenolyser;Radboudumc_:_Exome_panels;SysID_candidate_ID_genes	11
[truncated: 538 more rows]

## Sheet: GDD_genotypic_diversity
Gene	Gene_ENSG	Chromosome	number_of_individual	number_of_variants	%_of GDD
ABCA4	ENSG00000198691	1	838	83	12.7201
POLG	ENSG00000140521	15	271	29	4.11354
USH2A	ENSG00000042781	1	237	69	3.59745
CEP290	ENSG00000198707	12	219	26	3.32423
SACS	ENSG00000151835	13	208	23	3.15726
SMPD1	ENSG00000166311	11	201	13	3.051
ATP7B	ENSG00000123191	13	186	36	2.82332
IFIH1	ENSG00000115267	2	181	3	2.74742
SNORD118	ENSG00000200463	17	181	36	2.74742
TMEM107	ENSG00000179029	17	181	36	2.74742
DHCR7	ENSG00000172893	11	177	18	2.6867
TUBB3	ENSG00000258947	16	174	12	2.64117
GJB2	ENSG00000165474	13	164	24	2.48937
PAH	ENSG00000171759	12	160	54	2.42866
FANCG	ENSG00000221829	9	158	9	2.3983
VCP	ENSG00000165280	9	158	9	2.3983
PHYH	ENSG00000107537	10	157	7	2.38312
PPOX	ENSG00000143224	1	153	1	2.3224
ACADM	ENSG00000117054	1	151	19	2.29205
SPTAN1	ENSG00000197694	9	147	9	2.23133
GATA4	ENSG00000136574	8	146	3	2.21615
RBM8A	ENSG00000265241	1	144	3	2.18579
KCNJ1	ENSG00000151704	11	143	4	2.17061
LRP5	ENSG00000162337	11	143	4	2.17061
SPG7	ENSG00000197912	16	140	12	2.12508
BCHE	ENSG00000114200	3	137	8	2.07954
PRRT2	ENSG00000167371	16	133	2	2.01882
HPDL	ENSG00000186603	1	132	14	2.00364
DPYD	ENSG00000188641	1	131	8	1.98846
GALC	ENSG00000054983	14	130	14	1.97328
OCA2	ENSG00000104044	15	130	17	1.97328
VPS13B	ENSG00000132549	8	128	28	1.94293
MKKS	ENSG00000125863	20	124	6	1.88221
SLC26A4	ENSG00000091137	7	124	29	1.88221
SLC36A2	ENSG00000186335	5	124	1	1.88221
SCN9A	ENSG00000169432	2	122	12	1.85185
ATM	ENSG00000149311	11	121	29	1.83667
ROM1	ENSG00000149489	11	120	5	1.82149
ATR	ENSG00000175054	3	119	5	1.80631
PDE6B	ENSG00000133256	4	112	9	1.70006
EHMT1	ENSG00000181090	9	110	7	1.6697
ACSF3	ENSG00000176715	16	105	10	1.59381
ANO5	ENSG00000171714	11	104	13	1.57863
DOCK7	ENSG00000116641	1	103	4	1.56345
PMM2	ENSG00000140650	16	103	17	1.56345
CHD2	ENSG00000173575	15	101	7	1.53309
PMP22	ENSG00000109099	17	100	2	1.51791
BTD	ENSG00000169814	3	99	20	1.50273
ATRX	ENSG00000085224	X	98	6	1.48755
GNPTAB	ENSG00000111670	12	98	10	1.48755
PEX11B	ENSG00000131779	1	98	2	1.48755
PIEZO1	ENSG00000103335	16	98	5	1.48755
PRKN	ENSG00000185345	6	93	12	1.41166
OFD1	ENSG00000046651	X	91	3	1.3813
CC2D1A	ENSG00000132024	19	89	2	1.35094
EP300	ENSG00000100393	22	88	8	1.33576
ASPM	ENSG00000066279	1	87	15	1.32058
OXTR	ENSG00000180914	3	81	5	1.22951
SBDS	ENSG00000126524	7	81	3	1.22951
HGSNAT	ENSG00000165102	8	79	12	1.19915
FANCI	ENSG00000140525	15	78	14	1.18397
PHOX2B	ENSG00000109132	4	78	5	1.18397
GLI3	ENSG00000106571	7	77	2	1.16879
LAMA2	ENSG00000196569	6	77	17	1.16879
AR	ENSG00000169083	X	76	7	1.15361
BBS5	ENSG00000163093	2	75	2	1.13843
HEXA	ENSG00000213614	15	75	15	1.13843
RYR1	ENSG00000196218	19	75	36	1.13843
KIF1C	ENSG00000129250	17	74	4	1.12325
GALT	ENSG00000213930	9	72	17	1.0929
NAGA	ENSG00000198951	22	72	3	1.0929
PTEN	ENSG00000171862	10	72	11	1.0929
TTN	ENSG00000155657	2	72	24	1.0929
GUCY2D	ENSG00000132518	17	71	6	1.07772
SCN1A	ENSG00000144285	2	71	14	1.07772
SLC12A1	ENSG00000074803	15	71	2	1.07772
ALDOB	ENSG00000136872	9	70	8	1.06254
DUOX2	ENSG00000140279	15	70	20	1.06254
GHR	ENSG00000112964	5	70	4	1.06254
KIAA0586	ENSG00000100578	14	70	6	1.06254
GLDC	ENSG00000178445	9	69	15	1.04736
CAPN3	ENSG00000092529	15	68	27	1.03218
EXOSC8	ENSG00000120699	13	68	1	1.03218
SLC6A19	ENSG00000174358	5	68	5	1.03218
PEX6	ENSG00000124587	6	67	9	1.017
WARS2	ENSG00000116874	1	67	4	1.017
GDF6	ENSG00000156466	8	65	5	0.986642
ANO10	ENSG00000160746	3	63	3	0.956284
DYNC2H1	ENSG00000187240	11	63	28	0.956284
HCN4	ENSG00000138622	15	63	1	0.956284
PDX1	ENSG00000139515	13	62	3	0.941105
ACO2	ENSG00000100412	22	61	2	0.925926
CDH23	ENSG00000107736	10	61	20	0.925926
PNPT1	ENSG00000138035	2	61	10	0.925926
SLC3A1	ENSG00000138079	2	61	10	0.925926
TERT	ENSG00000164362	5	61	6	0.925926
APC	ENSG00000134982	5	60	5	0.910747
CPLANE1	ENSG00000197603	5	60	11	0.910747
ASL	ENSG00000126522	7	59	16	0.895568
NPHP3	ENSG00000113971	3	58	10	0.880389
WFS1	ENSG00000109501	4	58	18	0.880389
GAN	ENSG00000261609	16	57	2	0.865209
MYO9A	ENSG00000066933	15	57	4	0.865209
NPC1	ENSG00000141458	18	57	22	0.865209
ACY1	ENSG00000243989	3	56	2	0.85003
EYS	ENSG00000188107	6	56	31	0.85003
GBA	ENSG00000177628	1	56	17	0.85003
GDNF	ENSG00000168621	5	54	1	0.819672
MKS1	ENSG00000011143	17	54	7	0.819672
TBC1D24	ENSG00000162065	16	54	7	0.819672
DHTKD1	ENSG00000181192	10	52	3	0.789314
FANCL	ENSG00000115392	2	52	5	0.789314
IDUA	ENSG00000127415	4	52	16	0.789314
MADD	ENSG00000110514	11	52	5	0.789314
MITF	ENSG00000187098	3	52	2	0.789314
ASAH1	ENSG00000104763	8	49	6	0.743777
MYH7	ENSG00000092054	14	49	23	0.743777
NUBPL	ENSG00000151413	14	49	5	0.743777
FTCD	ENSG00000160282	21	48	6	0.728597
MCCC2	ENSG00000131844	5	48	9	0.728597
PREPL	ENSG00000138078	2	48	6	0.728597
CREBBP	ENSG00000005339	16	47	13	0.713418
BBS1	ENSG00000174483	11	46	5	0.698239
CEP120	ENSG00000168944	5	46	3	0.698239
FANCA	ENSG00000187741	16	46	16	0.698239
ADAR	ENSG00000160710	1	45	3	0.68306
CEP41	ENSG00000106477	7	45	2	0.68306
POGZ	ENSG00000143442	1	45	12	0.68306
FLCN	ENSG00000154803	17	44	2	0.667881
FOXE1	ENSG00000178919	9	44	1	0.667881
MYO7A	ENSG00000137474	11	44	21	0.667881
DKC1	ENSG00000130826	X	43	2	0.652702
DMD	ENSG00000198947	X	43	3	0.652702
NEB	ENSG00000183091	2	43	22	0.652702
APOE	ENSG00000130203	19	42	7	0.637523
MVK	ENSG00000110921	12	42	7	0.637523
POLR3A	ENSG00000148606	10	42	9	0.637523
RELN	ENSG00000189056	7	42	4	0.637523
UNC80	ENSG00000144406	2	42	6	0.637523
ALOXE3	ENSG00000179148	17	41	9	0.622344
ANK2	ENSG00000145362	4	41	6	0.622344
BRPF1	ENSG00000156983	3	41	3	0.622344
CYP24A1	ENSG00000019186	20	41	6	0.622344
FBN1	ENSG00000166147	15	41	7	0.622344
RBFOX1	ENSG00000078328	16	41	2	0.622344
TG	ENSG00000042832	8	41	7	0.622344
UBA5	ENSG00000081307	3	41	4	0.622344
ACADSB	ENSG00000196177	10	40	6	0.607165
CRB1	ENSG00000134376	1	40	15	0.607165
KCNT1	ENSG00000107147	9	40	7	0.607165
MMACHC	ENSG00000132763	1	40	27	0.607165
PRPH2	ENSG00000112619	6	40	8	0.607165
SPINK5	ENSG00000133710	5	40	9	0.607165
PRDX1	ENSG00000117450	1	39	26	0.591985
RYR2	ENSG00000198626	1	39	6	0.591985
ASCC1	ENSG00000138303	10	38	2	0.576806
CEP164	ENSG00000110274	11	38	2	0.576806
CPA6	ENSG00000165078	8	38	3	0.576806
MFSD8	ENSG00000164073	4	38	3	0.576806
SIX3	ENSG00000138083	2	38	2	0.576806
CIC	ENSG00000079432	19	37	2	0.561627
PAFAH1B3	ENSG00000079462	19	37	2	0.561627
SYNE1	ENSG00000131018	6	37	4	0.561627
ABCC8	ENSG00000006071	11	36	17	0.546448
IQCB1	ENSG00000173226	3	36	5	0.546448
NDUFB3	ENSG00000119013	2	36	2	0.546448
ARSA	ENSG00000100299	22	35	12	0.531269
DOCK3	ENSG00000088538	3	35	3	0.531269
SPATA5	ENSG00000145375	4	35	12	0.531269
FH	ENSG00000091483	1	34	5	0.51609
GBE1	ENSG00000114480	3	34	8	0.51609
LRPPRC	ENSG00000138095	2	34	6	0.51609
BRCA2	ENSG00000139618	13	33	23	0.500911
FANCM	ENSG00000187790	14	33	5	0.500911
GNE	ENSG00000159921	9	33	15	0.500911
SGSH	ENSG00000181523	17	33	12	0.500911
TMEM67	ENSG00000164953	8	33	11	0.500911
GFAP	ENSG00000131095	17	32	6	0.485732
PEX1	ENSG00000127980	7	32	6	0.485732
RNASEH2B	ENSG00000136104	13	32	6	0.485732
CLPB	ENSG00000162129	11	31	4	0.470553
COL1A1	ENSG00000108821	17	31	9	0.470553
DEPDC5	ENSG00000100150	22	31	3	0.470553
LIPT1	ENSG00000144182	2	31	2	0.470553
NARS1	ENSG00000134440	18	31	3	0.470553
PCCB	ENSG00000114054	3	31	6	0.470553
DLG4	ENSG00000132535	17	30	10	0.455373
KCNQ2	ENSG00000075043	20	30	18	0.455373
POLR3B	ENSG00000013503	12	30	10	0.455373
PROKR2	ENSG00000101292	20	30	7	0.455373
RAD50	ENSG00000113522	5	30	13	0.455373
ACADS	ENSG00000122971	12	29	17	0.440194
CC2D2A	ENSG00000048342	4	29	12	0.440194
CEP152	ENSG00000103995	15	29	8	0.440194
CRB2	ENSG00000148204	9	29	4	0.440194
EDN3	ENSG00000124205	20	29	1	0.440194
MECP2	ENSG00000169057	X	29	16	0.440194
SHANK3	ENSG00000251322	22	29	6	0.440194
SLC25A46	ENSG00000164209	5	29	2	0.440194
CLN3	ENSG00000188603	16	28	7	0.425015
CNGB1	ENSG00000070729	16	28	11	0.425015
EFTUD2	ENSG00000108883	17	28	5	0.425015
TMEM126B	ENSG00000171204	11	28	2	0.425015
TRIT1	ENSG00000043514	1	28	4	0.425015
CNGA1	ENSG00000198515	4	27	8	0.409836
ERCC2	ENSG00000104884	19	27	8	0.409836
ERCC6	ENSG00000225830	10	27	12	0.409836
BRIP1	ENSG00000136492	17	26	15	0.394657
CP	ENSG00000047457	3	26	5	0.394657
GPR161	ENSG00000143147	1	26	1	0.394657
NBAS	ENSG00000151779	2	26	8	0.394657
TRPM1	ENSG00000134160	15	26	9	0.394657
GATM	ENSG00000171766	15	25	2	0.379478
GCDH	ENSG00000105607	19	25	17	0.379478
HERC2	ENSG00000128731	15	25	3	0.379478
PRF1	ENSG00000180644	10	25	5	0.379478
RARS2	ENSG00000146282	6	25	11	0.379478
SCN2A	ENSG00000136531	2	25	10	0.379478
SPATA5L1	ENSG00000171763	15	25	2	0.379478
ALG1	ENSG00000033011	16	24	4	0.364299
ANKRD11	ENSG00000167522	16	24	15	0.364299
FKRP	ENSG00000181027	19	24	2	0.364299
HPD	ENSG00000158104	12	24	2	0.364299
MCPH1	ENSG00000147316	8	24	8	0.364299
PIGG	ENSG00000174227	4	24	3	0.364299
TRIM32	ENSG00000119401	9	24	2	0.364299
GRIP1	ENSG00000155974	12	23	2	0.34912
IQSEC2	ENSG00000124313	X	23	11	0.34912
PIGN	ENSG00000197563	18	23	9	0.34912
PRMT7	ENSG00000132600	16	23	6	0.34912
DUOXA2	ENSG00000140274	15	22	10	0.33394
EIF3F	ENSG00000175390	11	22	1	0.33394
GAMT	ENSG00000130005	19	22	15	0.33394
GJB6	ENSG00000121742	13	22	2	0.33394
NDUFS7	ENSG00000115286	19	22	14	0.33394
SCO2	ENSG00000284194	22	22	18	0.33394
TYMP	ENSG00000025708	22	22	18	0.33394
ABCA7	ENSG00000064687	19	21	1	0.318761
ASS1	ENSG00000130707	9	21	12	0.318761
GMPPB	ENSG00000173540	3	21	7	0.318761
PSMB8	ENSG00000204264	6	21	1	0.318761
TSEN54	ENSG00000182173	17	21	2	0.318761
AGL	ENSG00000162688	1	20	13	0.303582
ARID1B	ENSG00000049618	6	20	18	0.303582
BLM	ENSG00000197299	15	20	11	0.303582
ELAC2	ENSG00000006744	17	20	2	0.303582
KMT2A	ENSG00000118058	11	20	17	0.303582
MBD5	ENSG00000204406	2	20	3	0.303582
PALB2	ENSG00000083093	16	20	11	0.303582
RECQL4	ENSG00000160957	8	20	11	0.303582
TPO	ENSG00000115705	2	20	6	0.303582
ALDH7A1	ENSG00000164904	5	19	8	0.288403
ALMS1	ENSG00000116127	2	19	13	0.288403
BBS10	ENSG00000179941	12	19	4	0.288403
CLTCL1	ENSG00000070371	22	19	8	0.288403
DST	ENSG00000151914	6	19	4	0.288403
KRT81	ENSG00000205426	12	19	2	0.288403
KRT86	ENSG00000170442	12	19	2	0.288403
LIPA	ENSG00000107798	10	19	4	0.288403
MFN2	ENSG00000116688	1	19	6	0.288403
NBN	ENSG00000104320	8	19	6	0.288403
NR2E3	ENSG00000278570	15	19	5	0.288403
PCDH19	ENSG00000165194	X	19	3	0.288403
PTPN23	ENSG00000076201	3	19	6	0.288403
STIL	ENSG00000123473	1	19	2	0.288403
ACAD9	ENSG00000177646	3	18	4	0.273224
ALG6	ENSG00000088035	1	18	7	0.273224
CDT1	ENSG00000167513	16	18	9	0.273224
DDX3X	ENSG00000215301	X	18	12	0.273224
FIG4	ENSG00000112367	6	18	6	0.273224
GRIN2B	ENSG00000273079	12	18	11	0.273224
GYS2	ENSG00000111713	12	18	8	0.273224
HEXB	ENSG00000049860	5	18	8	0.273224
IVD	ENSG00000128928	15	18	5	0.273224
LEMD3	ENSG00000174106	12	18	1	0.273224
MCCC1	ENSG00000078070	3	18	11	0.273224
NPC2	ENSG00000119655	14	18	6	0.273224
OPA1	ENSG00000198836	3	18	3	0.273224
PAPSS2	ENSG00000198682	10	18	1	0.273224
SYNGAP1	ENSG00000197283	6	18	18	0.273224
TCF4	ENSG00000196628	18	18	15	0.273224
TPP1	ENSG00000166340	11	18	9	0.273224
TSHR	ENSG00000165409	14	18	7	0.273224
UPB1	ENSG00000100024	22	18	4	0.273224
ZNF142	ENSG00000115568	2	18	16	0.273224
ADSL	ENSG00000239900	22	17	6	0.258045
AHI1	ENSG00000135541	6	17	8	0.258045
AIPL1	ENSG00000129221	17	17	4	0.258045
AP5Z1	ENSG00000242802	7	17	5	0.258045
ATP5F1E	ENSG00000124172	20	17	1	0.258045
CDHR1	ENSG00000148600	10	17	2	0.258045
CLCNKB	ENSG00000184908	1	17	6	0.258045
ELP4	ENSG00000109911	11	17	4	0.258045
NAGLU	ENSG00000108784	17	17	12	0.258045
NMNAT1	ENSG00000173614	1	17	5	0.258045
PAX6	ENSG00000007372	11	17	4	0.258045
PLA2G6	ENSG00000184381	22	17	12	0.258045
SLC39A8	ENSG00000138821	4	17	2	0.258045
SMARCAL1	ENSG00000138375	2	17	7	0.258045
SPG11	ENSG00000104133	15	17	10	0.258045
TINF2	ENSG00000092330	14	17	3	0.258045
ADA	ENSG00000196839	20	16	9	0.242866
APTX	ENSG00000137074	9	16	3	0.242866
BCS1L	ENSG00000074582	2	16	14	0.242866
BEST1	ENSG00000167995	11	16	12	0.242866
BRCA1	ENSG00000012048	17	16	15	0.242866
ECHS1	ENSG00000127884	10	16	10	0.242866
ERCC4	ENSG00000175595	16	16	5	0.242866
HADHA	ENSG00000084754	2	16	5	0.242866
MMAB	ENSG00000139428	12	16	6	0.242866
MMUT	ENSG00000146085	6	16	26	0.242866
MUT	ENSG00000146085	6	16	26	0.242866
NOTCH3	ENSG00000074181	19	16	5	0.242866
NPHP4	ENSG00000131697	1	16	10	0.242866
PTCH1	ENSG00000185920	9	16	8	0.242866
SDHA	ENSG00000073578	5	16	7	0.242866
UGT1A1	ENSG00000241635	2	16	6	0.242866
USH1C	ENSG00000006611	11	16	6	0.242866
ZFYVE26	ENSG00000072121	14	16	17	0.242866
ASXL3	ENSG00000141431	18	15	8	0.227687
ATRIP	ENSG00000164053	3	15	12	0.227687
BBS12	ENSG00000181004	4	15	9	0.227687
CERS1	ENSG00000223802	19	15	14	0.227687
EXOSC3	ENSG00000107371	9	15	3	0.227687
FOXG1	ENSG00000176165	14	15	10	0.227687
KPTN	ENSG00000118162	19	15	4	0.227687
NDE1	ENSG00000072864	16	15	2	0.227687
PCCA	ENSG00000175198	13	15	7	0.227687
PNKP	ENSG00000039650	19	15	5	0.227687
RET	ENSG00000165731	10	15	7	0.227687
TELO2	ENSG00000100726	16	15	5	0.227687
TOMM40	ENSG00000130204	19	15	2	0.227687
TREX1	ENSG00000213689	3	15	12	0.227687
UPF1	ENSG00000005007	19	15	14	0.227687
ADNP	ENSG00000101126	20	14	9	0.212508
AGRN	ENSG00000188157	1	14	2	0.212508
BPTF	ENSG00000171634	17	14	1	0.212508
DCHS1	ENSG00000166341	11	14	8	0.212508
DONSON	ENSG00000159147	21	14	10	0.212508
DPAGT1	ENSG00000172269	11	14	7	0.212508
IFT74	ENSG00000096872	9	14	2	0.212508
IKBKG	ENSG00000269335	X	14	2	0.212508
NDUFV1	ENSG00000167792	11	14	7	0.212508
PACS1	ENSG00000175115	11	14	1	0.212508
PIGL	ENSG00000108474	17	14	3	0.212508
PPT1	ENSG00000131238	1	14	6	0.212508
PROP1	ENSG00000175325	5	14	5	0.212508
RPE65	ENSG00000116745	1	14	12	0.212508
SLC17A5	ENSG00000119899	6	14	9	0.212508
SOD1	ENSG00000142168	21	14	5	0.212508
SON	ENSG00000159140	21	14	8	0.212508
SURF1	ENSG00000148290	9	14	5	0.212508
TSC2	ENSG00000103197	16	14	1	0.212508
TSFM	ENSG00000123297	12	14	4	0.212508
WWOX	ENSG00000186153	16	14	8	0.212508
BBS2	ENSG00000125124	16	13	9	0.197328
CEP83	ENSG00000173588	12	13	4	0.197328
CNTNAP1	ENSG00000108797	17	13	3	0.197328
DBT	ENSG00000137992	1	13	5	0.197328
IER3IP1	ENSG00000134049	18	13	1	0.197328
NGLY1	ENSG00000151092	3	13	5	0.197328
NKX2-5	ENSG00000183072	5	13	4	0.197328
PPP2R5D	ENSG00000112640	6	13	6	0.197328
SCAF4	ENSG00000156304	21	13	4	0.197328
STXBP1	ENSG00000136854	9	13	9	0.197328
TRAPPC4	ENSG00000196655	11	13	7	0.197328
TUBGCP4	ENSG00000137822	15	13	3	0.197328
ALG14	ENSG00000172339	1	12	6	0.182149
ARV1	ENSG00000173409	1	12	2	0.182149
CENPJ	ENSG00000151849	13	12	7	0.182149
CLCN2	ENSG00000114859	3	12	1	0.182149
CNOT3	ENSG00000088038	19	12	3	0.182149
COQ8A	ENSG00000163050	1	12	10	0.182149
CSTB	ENSG00000160213	21	12	2	0.182149
CYP27A1	ENSG00000135929	2	12	5	0.182149
DCPS	ENSG00000110063	11	12	1	0.182149
DOCK8	ENSG00000107099	9	12	3	0.182149
DPH1	ENSG00000108963	17	12	1	0.182149
FANCC	ENSG00000158169	9	12	6	0.182149
GFM2	ENSG00000164347	5	12	5	0.182149
HNRNPU	ENSG00000153187	1	12	2	0.182149
IFT140	ENSG00000187535	16	12	9	0.182149
IMPG2	ENSG00000081148	3	12	5	0.182149
KCNQ3	ENSG00000184156	8	12	6	0.182149
LZTR1	ENSG00000099949	22	12	8	0.182149
MAPK8IP3	ENSG00000138834	16	12	4	0.182149
MRPS34	ENSG00000074071	16	12	4	0.182149
MTHFR	ENSG00000177000	1	12	10	0.182149
PGAP3	ENSG00000161395	17	12	5	0.182149
PHF3	ENSG00000118482	6	12	17	0.182149
PROC	ENSG00000115718	2	12	7	0.182149
PTPN11	ENSG00000179295	12	12	11	0.182149
RIPPLY2	ENSG00000203877	6	12	1	0.182149
SERAC1	ENSG00000122335	6	12	4	0.182149
SOX3	ENSG00000134595	X	12	1	0.182149
TBCK	ENSG00000145348	4	12	7	0.182149
TTC8	ENSG00000165533	14	12	2	0.182149
ASXL1	ENSG00000171456	20	11	3	0.16697
B3GALTL	ENSG00000187676	13	11	2	0.16697
B3GLCT	ENSG00000187676	13	11	2	0.16697
B4GALT7	ENSG00000027847	5	11	4	0.16697
BSND	ENSG00000162399	1	11	5	0.16697
CACNA1A	ENSG00000141837	19	11	8	0.16697
CENPF	ENSG00000117724	1	11	4	0.16697
CLCN6	ENSG00000011021	1	11	8	0.16697
COX20	ENSG00000203667	1	11	1	0.16697
CRBN	ENSG00000113851	3	11	9	0.16697
DOCK6	ENSG00000130158	19	11	4	0.16697
DYNC2LI1	ENSG00000138036	2	11	6	0.16697
EBP	ENSG00000147155	X	11	1	0.16697
FANCD2	ENSG00000144554	3	11	6	0.16697
HAX1	ENSG00000143575	1	11	4	0.16697
ITGA7	ENSG00000135424	12	11	7	0.16697
ITPR1	ENSG00000150995	3	11	6	0.16697
KIF1A	ENSG00000130294	2	11	9	0.16697
NEK2	ENSG00000117650	1	11	1	0.16697
PCDH15	ENSG00000150275	10	11	9	0.16697
POMGNT1	ENSG00000085998	1	11	5	0.16697
PROM1	ENSG00000007062	4	11	9	0.16697
RP1	ENSG00000104237	8	11	9	0.16697
RPGRIP1	ENSG00000092200	14	11	5	0.16697
SAMHD1	ENSG00000101347	20	11	5	0.16697
SETD5	ENSG00000168137	3	11	7	0.16697
SHH	ENSG00000164690	7	11	3	0.16697
STRA6	ENSG00000137868	15	11	1	0.16697
TRNT1	ENSG00000072756	3	11	9	0.16697
AAAS	ENSG00000094914	12	10	7	0.151791
BCKDHB	ENSG00000083123	6	10	9	0.151791
CERKL	ENSG00000188452	2	10	4	0.151791
COL4A2	ENSG00000134871	13	10	1	0.151791
DYRK1A	ENSG00000157540	21	10	8	0.151791
FGFR1	ENSG00000077782	8	10	4	0.151791
GLB1	ENSG00000170266	3	10	7	0.151791
HTRA2	ENSG00000115317	2	10	1	0.151791
LAMB2	ENSG00000172037	3	10	4	0.151791
NF1	ENSG00000196712	17	10	9	0.151791
PDE6A	ENSG00000132915	5	10	7	0.151791
PNPO	ENSG00000108439	17	10	3	0.151791
POLR1C	ENSG00000171453	6	10	6	0.151791
RAB23	ENSG00000112210	6	10	1	0.151791
RDH12	ENSG00000139988	14	10	13	0.151791
RHO	ENSG00000163914	3	10	6	0.151791
SLC2A10	ENSG00000197496	20	10	4	0.151791
STUB1	ENSG00000103266	16	10	2	0.151791
TGDS	ENSG00000088451	13	10	1	0.151791
TRAPPC9	ENSG00000167632	8	10	4	0.151791
TRIO	ENSG00000038382	5	10	6	0.151791
TRMT5	ENSG00000126814	14	10	2	0.151791
TTC37	ENSG00000198677	5	10	4	0.151791
WASHC4	ENSG00000136051	12	10	1	0.151791
WDR19	ENSG00000157796	4	10	6	0.151791
WDR62	ENSG00000075702	19	10	6	0.151791
ZNF335	ENSG00000198026	20	10	2	0.151791
ATG7	ENSG00000197548	3	9	2	0.136612
B3GALNT2	ENSG00000162885	1	9	5	0.136612
BRAT1	ENSG00000106009	7	9	8	0.136612
CDK13	ENSG00000065883	7	9	4	0.136612
COX15	ENSG00000014919	10	9	2	0.136612
CSPP1	ENSG00000104218	8	9	7	0.136612
CTC1	ENSG00000178971	17	9	5	0.136612
DDX54	ENSG00000123064	12	9	2	0.136612
ERBB2	ENSG00000141736	17	9	5	0.136612
FBXL4	ENSG00000112234	6	9	6	0.136612
FGD1	ENSG00000102302	X	9	2	0.136612
FOXP1	ENSG00000114861	3	9	7	0.136612
GFM1	ENSG00000168827	3	9	8	0.136612
GJA5	ENSG00000265107	1	9	1	0.136612
GNAO1	ENSG00000087258	16	9	7	0.136612
KCNJ16	ENSG00000153822	17	9	1	0.136612
LARP7	ENSG00000174720	4	9	3	0.136612
LARS1	ENSG00000133706	5	9	2	0.136612
LIG4	ENSG00000174405	13	9	4	0.136612
LMNA	ENSG00000160789	1	9	6	0.136612
MAN2B1	ENSG00000104774	19	9	4	0.136612
NAA15	ENSG00000164134	4	9	6	0.136612
NCAPD2	ENSG00000010292	12	9	1	0.136612
NDUFAF3	ENSG00000178057	3	9	1	0.136612
OTC	ENSG00000036473	X	9	2	0.136612
PITX2	ENSG00000164093	4	9	1	0.136612
PRICKLE1	ENSG00000139174	12	9	1	0.136612
RAD51C	ENSG00000108384	17	9	6	0.136612
SPTBN2	ENSG00000173898	11	9	3	0.136612
TCN2	ENSG00000185339	22	9	1	0.136612
TMEM216	ENSG00000187049	11	9	3	0.136612
TRAPPC11	ENSG00000168538	4	9	4	0.136612
TULP1	ENSG00000112041	6	9	7	0.136612
VARS2	ENSG00000137411	6	9	4	0.136612
XRCC4	ENSG00000152422	5	9	2	0.136612
AQP2	ENSG00000167580	12	8	6	0.121433
AUTS2	ENSG00000158321	7	8	6	0.121433
BBS7	ENSG00000138686	4	8	5	0.121433
CCBE1	ENSG00000183287	18	8	3	0.121433
CLRN1	ENSG00000163646	3	8	5	0.121433
CNTNAP2	ENSG00000174469	7	8	4	0.121433
COL18A1	ENSG00000182871	21	8	5	0.121433
CTNNB1	ENSG00000168036	3	8	7	0.121433
CYB5R3	ENSG00000100243	22	8	5	0.121433
DNMT3A	ENSG00000119772	2	8	7	0.121433
DPYS	ENSG00000147647	8	8	5	0.121433
FLNA	ENSG00000196924	X	8	3	0.121433
FRAS1	ENSG00000138759	4	8	7	0.121433
GATAD2B	ENSG00000143614	1	8	5	0.121433
GCH1	ENSG00000131979	14	8	4	0.121433
GPSM2	ENSG00000121957	1	8	3	0.121433
HLCS	ENSG00000159267	21	8	4	0.121433
IYD	ENSG00000009765	6	8	2	0.121433
KCTD7	ENSG00000243335	7	8	4	0.121433
MMAA	ENSG00000151611	4	8	4	0.121433
MORC2	ENSG00000133422	22	8	6	0.121433
MRE11	ENSG00000020922	11	8	7	0.121433
MSTO1	ENSG00000125459	1	8	4	0.121433
MTFMT	ENSG00000103707	15	8	3	0.121433
NRXN3	ENSG00000021645	14	8	1	0.121433
ORC1	ENSG00000085840	1	8	3	0.121433
PANK2	ENSG00000125779	20	8	5	0.121433
PCNT	ENSG00000160299	21	8	6	0.121433
PDGFRB	ENSG00000113721	5	8	3	0.121433
PEX12	ENSG00000108733	17	8	5	0.121433
PIGV	ENSG00000060642	1	8	6	0.121433
RBBP8	ENSG00000101773	18	8	3	0.121433
RPS19	ENSG00000105372	19	8	1	0.121433
SCARB2	ENSG00000138760	4	8	6	0.121433
SEC23B	ENSG00000101310	20	8	5	0.121433
SLC13A5	ENSG00000141485	17	8	3	0.121433
SLC6A1	ENSG00000157103	3	8	5	0.121433
SZT2	ENSG00000198198	1	8	5	0.121433
TRMT10A	ENSG00000145331	4	8	1	0.121433
TXNRD2	ENSG00000184470	22	8	1	0.121433
UGDH	ENSG00000109814	4	8	3	0.121433
WDR45	ENSG00000196998	X	8	5	0.121433
AHDC1	ENSG00000126705	1	7	5	0.106254
ARX	ENSG00000004848	X	7	1	0.106254
BCKDHA	ENSG00000248098	19	7	5	0.106254
CENPE	ENSG00000138778	4	7	1	0.106254
CPS1	ENSG00000021826	2	7	3	0.106254
CRX	ENSG00000105392	19	7	3	0.106254
CSNK2A1	ENSG00000101266	20	7	4	0.106254
DHPS	ENSG00000095059	19	7	2	0.106254
EARS2	ENSG00000103356	16	7	5	0.106254
EEF1A2	ENSG00000101210	20	7	7	0.106254
EVC2	ENSG00000173040	4	7	6	0.106254
EXT2	ENSG00000151348	11	7	4	0.106254
FARS2	ENSG00000145982	6	7	4	0.106254
FBP1	ENSG00000165140	9	7	5	0.106254
FBXO11	ENSG00000138081	2	7	7	0.106254
FGFR3	ENSG00000068078	4	7	5	0.106254
FLVCR1	ENSG00000162769	1	7	3	0.106254
FXR1	ENSG00000114416	3	7	1	0.106254
GJB4	ENSG00000189433	1	7	2	0.106254
HARS1	ENSG00000170445	5	7	5	0.106254
KAT6B	ENSG00000156650	10	7	5	0.106254
KCND3	ENSG00000171385	1	7	5	0.106254
LAMA1	ENSG00000101680	18	7	3	0.106254
LMBRD1	ENSG00000168216	6	7	2	0.106254
MAP2K1	ENSG00000169032	15	7	6	0.106254
MC2R	ENSG00000185231	18	7	2	0.106254
MED13L	ENSG00000123066	12	7	6	0.106254
MPV17	ENSG00000115204	2	7	5	0.106254
MTOR	ENSG00000198793	1	7	2	0.106254
MTRR	ENSG00000124275	5	7	5	0.106254
NARS2	ENSG00000137513	11	7	5	0.106254
NDUFA9	ENSG00000139180	12	7	1	0.106254
NDUFAF2	ENSG00000164182	5	7	3	0.106254
NSD1	ENSG00000165671	5	7	7	0.106254
OSGEP	ENSG00000092094	14	7	4	0.106254
PCDH12	ENSG00000113555	5	7	2	0.106254
PEX10	ENSG00000157911	1	7	4	0.106254
POMT2	ENSG00000009830	14	7	4	0.106254
POR	ENSG00000127948	7	7	3	0.106254
RLBP1	ENSG00000140522	15	7	3	0.106254
RRM2B	ENSG00000048392	8	7	5	0.106254
SLC29A3	ENSG00000198246	10	7	4	0.106254
SLC6A8	ENSG00000130821	X	7	4	0.106254
SPATA7	ENSG00000042317	14	7	6	0.106254
TH	ENSG00000180176	11	7	5	0.106254
TRMT1	ENSG00000104907	19	7	1	0.106254
TUBB2A	ENSG00000137267	6	7	1	0.106254
YARS2	ENSG00000139131	12	7	7	0.106254
ALB	ENSG00000163631	4	6	4	0.0910747
ALDH4A1	ENSG00000159423	1	6	3	0.0910747
ALDH5A1	ENSG00000112294	6	6	3	0.0910747
ALG8	ENSG00000159063	11	6	2	0.0910747
ALOX12B	ENSG00000179477	17	6	3	0.0910747
ARL13B	ENSG00000169379	3	6	4	0.0910747
BRAF	ENSG00000157764	7	6	5	0.0910747
BRF1	ENSG00000185024	14	6	2	0.0910747
CASK	ENSG00000147044	X	6	4	0.0910747
CDK5RAP2	ENSG00000136861	9	6	3	0.0910747
CIB2	ENSG00000136425	15	6	3	0.0910747
COL2A1	ENSG00000139219	12	6	4	0.0910747
CYP2U1	ENSG00000155016	4	6	4	0.0910747
DHDDS	ENSG00000117682	1	6	3	0.0910747
DMPK	ENSG00000104936	19	6	2	0.0910747
DNM1L	ENSG00000087470	12	6	7	0.0910747
ERCC3	ENSG00000163161	2	6	3	0.0910747
FGF8	ENSG00000107831	10	6	1	0.0910747
GNPTG	ENSG00000090581	16	6	4	0.0910747
GRIN2A	ENSG00000183454	16	6	3	0.0910747
H1-4	ENSG00000168298	6	6	8	0.0910747
HIST1H1E	ENSG00000168298	6	6	8	0.0910747
HSD17B4	ENSG00000133835	5	6	3	0.0910747
HUWE1	ENSG00000086758	X	6	6	0.0910747
HYLS1	ENSG00000198331	11	6	6	0.0910747
JAG1	ENSG00000101384	20	6	1	0.0910747
MAN1B1	ENSG00000177239	9	6	5	0.0910747
MED12	ENSG00000184634	X	6	5	0.0910747
METTL23	ENSG00000181038	17	6	3	0.0910747
MOCS2	ENSG00000164172	5	6	1	0.0910747
MPI	ENSG00000178802	15	6	3	0.0910747
NUDT2	ENSG00000164978	9	6	1	0.0910747
ORC6	ENSG00000091651	16	6	1	0.0910747
P3H1	ENSG00000117385	1	6	4	0.0910747
PEX7	ENSG00000112357	6	6	2	0.0910747
PIGT	ENSG00000124155	20	6	3	0.0910747
POMT1	ENSG00000130714	9	6	5	0.0910747
PPM1D	ENSG00000170836	17	6	5	0.0910747
PUF60	ENSG00000179950	8	6	5	0.0910747
PURA	ENSG00000185129	5	6	6	0.0910747
PUS3	ENSG00000110060	11	6	6	0.0910747
RMND1	ENSG00000155906	6	6	2	0.0910747
RXYLT1	ENSG00000118600	12	6	4	0.0910747
SCN1B	ENSG00000105711	19	6	4	0.0910747
SDHB	ENSG00000117118	1	6	6	0.0910747
SETD1A	ENSG00000099381	16	6	1	0.0910747
SLC19A3	ENSG00000135917	2	6	2	0.0910747
SLC35C1	ENSG00000181830	11	6	1	0.0910747
SMAD4	ENSG00000141646	18	6	3	0.0910747
ST3GAL5	ENSG00000115525	2	6	4	0.0910747
STRADA	ENSG00000266173	17	6	2	0.0910747
THOC6	ENSG00000131652	16	6	3	0.0910747
TMCO1	ENSG00000143183	1	6	1	0.0910747
TMEM231	ENSG00000205084	16	6	2	0.0910747
TSHB	ENSG00000134200	1	6	1	0.0910747
TUBA1A	ENSG00000167552	12	6	5	0.0910747
UBE3A	ENSG00000114062	15	6	5	0.0910747
WAC	ENSG00000095787	10	6	5	0.0910747
ACTL6B	ENSG00000077080	7	5	4	0.0758956
AFG3L2	ENSG00000141385	18	5	2	0.0758956
AIMP2	ENSG00000106305	7	5	3	0.0758956
ARSL	ENSG00000157399	X	5	2	0.0758956
ATP1A3	ENSG00000105409	19	5	5	0.0758956
B9D1	ENSG00000108641	17	5	3	0.0758956
BCL11A	ENSG00000119866	2	5	4	0.0758956
C12ORF4	ENSG00000047621	12	5	2	0.0758956
C12orf4	ENSG00000047621	12	5	2	0.0758956
CLN5	ENSG00000102805	13	5	7	0.0758956
CLN8	ENSG00000182372	8	5	3	0.0758956
CTCF	ENSG00000102974	16	5	5	0.0758956
DARS2	ENSG00000117593	1	5	4	0.0758956
DDC	ENSG00000132437	7	5	3	0.0758956
DDX11	ENSG00000013573	12	5	3	0.0758956
DHX30	ENSG00000132153	3	5	3	0.0758956
DHX37	ENSG00000150990	12	5	3	0.0758956
DNA2	ENSG00000138346	10	5	3	0.0758956
EBF3	ENSG00000108001	10	5	4	0.0758956
EOGT	ENSG00000163378	3	5	3	0.0758956
FA2H	ENSG00000103089	16	5	2	0.0758956
FBXL3	ENSG00000005812	13	5	7	0.0758956
FOXRED1	ENSG00000110074	11	5	2	0.0758956
GATA6	ENSG00000141448	18	5	2	0.0758956
GJB1	ENSG00000169562	X	5	3	0.0758956
GPAA1	ENSG00000197858	8	5	3	0.0758956
HECW2	ENSG00000138411	2	5	4	0.0758956
HESX1	ENSG00000163666	3	5	5	0.0758956
HMGCL	ENSG00000117305	1	5	5	0.0758956
HNRNPH2	ENSG00000126945	X	5	1	0.0758956
IARS	ENSG00000196305	9	5	6	0.0758956
IARS1	ENSG00000196305	9	5	6	0.0758956
IMPDH1	ENSG00000106348	7	5	2	0.0758956
INPP5E	ENSG00000148384	9	5	4	0.0758956
KCNJ11	ENSG00000187486	11	5	5	0.0758956
KDM5B	ENSG00000117139	1	5	4	0.0758956
KIAA0753	ENSG00000198920	17	5	5	0.0758956
KIZ	ENSG00000088970	20	5	3	0.0758956
KMT2D	ENSG00000167548	12	5	4	0.0758956
LEPR	ENSG00000116678	1	5	1	0.0758956
LTBP2	ENSG00000119681	14	5	6	0.0758956
MEF2C	ENSG00000081189	5	5	4	0.0758956
MICU1	ENSG00000107745	10	5	3	0.0758956
MLC1	ENSG00000100427	22	5	2	0.0758956
MOCS1	ENSG00000124615	6	5	3	0.0758956
MTHFD1	ENSG00000100714	14	5	2	0.0758956
MYT1L	ENSG00000186487	2	5	4	0.0758956
NAA10	ENSG00000102030	X	5	4	0.0758956
NDUFAF5	ENSG00000101247	20	5	2	0.0758956
NDUFB9	ENSG00000147684	8	5	2	0.0758956
PACS2	ENSG00000179364	14	5	1	0.0758956
PC	ENSG00000173599	11	5	5	0.0758956
PHGDH	ENSG00000092621	1	5	3	0.0758956
PIGO	ENSG00000165282	9	5	3	0.0758956
PYCR1	ENSG00000183010	17	5	5	0.0758956
RARS1	ENSG00000113643	5	5	3	0.0758956
RCBTB1	ENSG00000136144	13	5	3	0.0758956
RPGRIP1L	ENSG00000103494	16	5	5	0.0758956
SATB2	ENSG00000119042	2	5	4	0.0758956
SEPSECS	ENSG00000109618	4	5	4	0.0758956
SLC6A5	ENSG00000165970	11	5	4	0.0758956
SMC1A	ENSG00000072501	X	5	4	0.0758956
STAR	ENSG00000147465	8	5	3	0.0758956
SUCLA2	ENSG00000136143	13	5	2	0.0758956
TAF1C	ENSG00000103168	16	5	2	0.0758956
TMEM70	ENSG00000175606	8	5	3	0.0758956
TMPRSS6	ENSG00000187045	22	5	3	0.0758956
TOR1A	ENSG00000136827	9	5	3	0.0758956
TPI1	ENSG00000111669	12	5	2	0.0758956
TUBB4A	ENSG00000104833	19	5	5	0.0758956
TUBGCP2	ENSG00000130640	10	5	1	0.0758956
USB1	ENSG00000103005	16	5	3	0.0758956
ZMYND11	ENSG00000015171	10	5	4	0.0758956
ACTG1	ENSG00000184009	17	4	3	0.0607165
ADGRG1	ENSG00000205336	16	4	4	0.0607165
AHCY	ENSG00000101444	20	4	2	0.0607165
ALG12	ENSG00000182858	22	4	3	0.0607165
AP4S1	ENSG00000100478	14	4	1	0.0607165
ARMC9	ENSG00000135931	2	4	3	0.0607165
ASNS	ENSG00000070669	7	4	4	0.0607165
ASPA	ENSG00000108381	17	4	3	0.0607165
B4GALNT1	ENSG00000135454	12	4	3	0.0607165
BBS4	ENSG00000140463	15	4	2	0.0607165
BCOR	ENSG00000183337	X	4	1	0.0607165
C12orf65	ENSG00000130921	12	4	4	0.0607165
CACNA1C	ENSG00000151067	12	4	3	0.0607165
CDC42BPB	ENSG00000198752	14	4	3	0.0607165
CHAT	ENSG00000070748	10	4	4	0.0607165
CHD7	ENSG00000171316	8	4	4	0.0607165
COL1A2	ENSG00000164692	7	4	2	0.0607165
COX10	ENSG00000006695	17	4	2	0.0607165
CTSA	ENSG00000064601	20	4	1	0.0607165
DDHD2	ENSG00000085788	8	4	3	0.0607165
DDOST	ENSG00000244038	1	4	3	0.0607165
DDR2	ENSG00000162733	1	4	2	0.0607165
DNAJC21	ENSG00000168724	5	4	3	0.0607165
ERF	ENSG00000105722	19	4	4	0.0607165
FAM161A	ENSG00000170264	2	4	3	0.0607165
GJB3	ENSG00000188910	1	4	3	0.0607165
GNB5	ENSG00000069966	15	4	3	0.0607165
GPR56	ENSG00000205336	10	4	4	0.0607165
HADHB	ENSG00000138029	2	4	4	0.0607165
HEPHL1	ENSG00000181333	11	4	1	0.0607165
HES7	ENSG00000179111	17	4	5	0.0607165
IFT172	ENSG00000138002	2	4	2	0.0607165
KARS1	ENSG00000065427	16	4	4	0.0607165
KAT6A	ENSG00000083168	8	4	3	0.0607165
KIF5C	ENSG00000168280	2	4	1	0.0607165
LIAS	ENSG00000121897	4	4	2	0.0607165
LMNB2	ENSG00000176619	19	4	2	0.0607165
MAGEL2	ENSG00000254585	15	4	3	0.0607165
MARS1	ENSG00000166986	12	4	2	0.0607165
MIPEP	ENSG00000027001	13	4	2	0.0607165
MTR	ENSG00000116984	1	4	1	0.0607165
MTRFR	ENSG00000130921	12	4	4	0.0607165
MYH3	ENSG00000109063	17	4	2	0.0607165
NALCN	ENSG00000102452	13	4	4	0.0607165
NFIX	ENSG00000008441	19	4	4	0.0607165
NRL	ENSG00000129535	14	4	2	0.0607165
PAFAH1B1	ENSG00000007168	17	4	2	0.0607165
PAX3	ENSG00000135903	2	4	3	0.0607165
PGM3	ENSG00000013375	6	4	1	0.0607165
PHKG2	ENSG00000156873	16	4	2	0.0607165
PIEZO2	ENSG00000154864	18	4	4	0.0607165
PIGP	ENSG00000185808	21	4	2	0.0607165
PIGS	ENSG00000087111	17	4	1	0.0607165
PNPLA6	ENSG00000032444	19	4	3	0.0607165
PQBP1	ENSG00000102103	X	4	6	0.0607165
PRKAR1A	ENSG00000108946	17	4	3	0.0607165
PSAP	ENSG00000197746	10	4	6	0.0607165
RAB27A	ENSG00000069974	15	4	3	0.0607165
RBP3	ENSG00000265203	10	4	4	0.0607165
RHOBTB2	ENSG00000008853	8	4	4	0.0607165
RTEL1	ENSG00000258366	20	4	4	0.0607165
SAR1B	ENSG00000152700	5	4	2	0.0607165
SCO1	ENSG00000133028	17	4	2	0.0607165
SETBP1	ENSG00000152217	18	4	4	0.0607165
SGPL1	ENSG00000166224	10	4	1	0.0607165
SH2B1	ENSG00000178188	16	4	2	0.0607165
SIGMAR1	ENSG00000147955	9	4	4	0.0607165
SIL1	ENSG00000120725	5	4	2	0.0607165
SLC25A1	ENSG00000100075	22	4	7	0.0607165
SLC35A2	ENSG00000102100	X	4	6	0.0607165
SLC9A6	ENSG00000198689	X	4	3	0.0607165
SMARCA2	ENSG00000080503	9	4	2	0.0607165
SOX2	ENSG00000181449	3	4	2	0.0607165
SPR	ENSG00000116096	2	4	1	0.0607165
TBX22	ENSG00000122145	X	4	1	0.0607165
TGFBR2	ENSG00000163513	3	4	3	0.0607165
TRIP12	ENSG00000153827	2	4	4	0.0607165
TTC19	ENSG00000011295	17	4	2	0.0607165
TUBGCP6	ENSG00000128159	22	4	2	0.0607165
WDR35	ENSG00000118965	2	4	3	0.0607165
XPA	ENSG00000136936	9	4	4	0.0607165
XRCC2	ENSG00000196584	7	4	2	0.0607165
ZBTB18	ENSG00000179456	1	4	3	0.0607165
ABCD1	ENSG00000101986	X	3	2	0.0455373
ABCD4	ENSG00000119688	14	3	3	0.0455373
ACAT1	ENSG00000075239	11	3	3	0.0455373
ACP5	ENSG00000102575	19	3	2	0.0455373
ACTB	ENSG00000075624	7	3	2	0.0455373
AGO1	ENSG00000092847	1	3	2	0.0455373
ALDH18A1	ENSG00000059573	10	3	3	0.0455373
ALDH3A2	ENSG00000072210	17	3	2	0.0455373
ALG11	ENSG00000253710	13	3	5	0.0455373
AMT	ENSG00000145020	3	3	2	0.0455373
ATP6V0A1	ENSG00000033627	17	3	1	0.0455373
AUH	ENSG00000148090	9	3	3	0.0455373
CBS	ENSG00000160200	21	3	2	0.0455373
CDC45	ENSG00000093009	22	3	3	0.0455373
CDKL5	ENSG00000008086	X	3	3	0.0455373
CEP135	ENSG00000174799	4	3	2	0.0455373
CEP63	ENSG00000182923	3	3	2	0.0455373
CERT1	ENSG00000113163	5	3	2	0.0455373
CHD3	ENSG00000170004	17	3	3	0.0455373
CHKB	ENSG00000100288	22	3	2	0.0455373
CLN6	ENSG00000128973	15	3	3	0.0455373
COG4	ENSG00000103051	16	3	1	0.0455373
COG7	ENSG00000168434	16	3	1	0.0455373
COL11A2	ENSG00000204248	6	3	3	0.0455373
COL4A3BP	ENSG00000113163	5	3	2	0.0455373
COX4I2	ENSG00000131055	20	3	1	0.0455373
COX7B	ENSG00000131174	X	3	2	0.0455373
CRPPA	ENSG00000214960	7	3	4	0.0455373
DCAF17	ENSG00000115827	2	3	1	0.0455373
DLAT	ENSG00000150768	11	3	2	0.0455373
DNAJC12	ENSG00000108176	10	3	3	0.0455373
DNAJC6	ENSG00000116675	1	3	2	0.0455373
DNM1	ENSG00000106976	9	3	3	0.0455373
DPF2	ENSG00000133884	11	3	2	0.0455373
DYNC1H1	ENSG00000197102	14	3	2	0.0455373
ELP2	ENSG00000134759	18	3	3	0.0455373
EPG5	ENSG00000152223	18	3	3	0.0455373
ERCC5	ENSG00000134899	13	3	3	0.0455373
FANCE	ENSG00000112039	6	3	2	0.0455373
FASTKD2	ENSG00000118246	2	3	2	0.0455373
FAT4	ENSG00000196159	4	3	1	0.0455373
FGF12	ENSG00000114279	3	3	1	0.0455373
FSCN2	ENSG00000186765	17	3	2	0.0455373
G6PC3	ENSG00000141349	17	3	3	0.0455373
GABRA1	ENSG00000022355	5	3	3	0.0455373
GCK	ENSG00000106633	7	3	3	0.0455373
GFER	ENSG00000127554	16	3	2	0.0455373
GLRB	ENSG00000109738	4	3	2	0.0455373
GNB1	ENSG00000078369	1	3	3	0.0455373
GPI	ENSG00000105220	19	3	2	0.0455373
GRIN1	ENSG00000176884	9	3	3	0.0455373
GTPBP2	ENSG00000172432	6	3	1	0.0455373
GUSB	ENSG00000169919	7	3	3	0.0455373
HACE1	ENSG00000085382	6	3	2	0.0455373
HBA1	ENSG00000206172	16	3	4	0.0455373
HBA2	ENSG00000188536	16	3	4	0.0455373
HDAC8	ENSG00000147099	X	3	2	0.0455373
HINT1	ENSG00000169567	5	3	2	0.0455373
IFT27	ENSG00000100360	22	3	2	0.0455373
INPP5K	ENSG00000132376	17	3	2	0.0455373
ISPD	ENSG00000214960	7	3	4	0.0455373
ITGB6	ENSG00000115221	2	3	2	0.0455373
ITPA	ENSG00000125877	20	3	3	0.0455373
KANSL1	ENSG00000120071	17	3	3	0.0455373
KAT5	ENSG00000172977	11	3	2	0.0455373
KCNB1	ENSG00000158445	20	3	3	0.0455373
KCNH1	ENSG00000143473	1	3	1	0.0455373
KCNJ10	ENSG00000177807	1	3	2	0.0455373
KLHL7	ENSG00000122550	7	3	2	0.0455373
KMT5B	ENSG00000110066	11	3	6	0.0455373
KNL1	ENSG00000137812	15	3	1	0.0455373
LINS	ENSG00000140471	15	3	2	0.0455373
LINS1	ENSG00000140471	15	3	2	0.0455373
LYST	ENSG00000143669	1	3	3	0.0455373
MAGT1	ENSG00000102158	X	3	2	0.0455373
MAK	ENSG00000111837	6	3	2	0.0455373
MANBA	ENSG00000109323	4	3	3	0.0455373
MAT1A	ENSG00000151224	10	3	3	0.0455373
MYCN	ENSG00000134323	2	3	2	0.0455373
NDUFS2	ENSG00000158864	1	3	1	0.0455373
NDUFV2	ENSG00000178127	18	3	2	0.0455373
NKX6-2	ENSG00000148826	10	3	1	0.0455373
NPHP1	ENSG00000144061	2	3	2	0.0455373
NUP107	ENSG00000111581	12	3	2	0.0455373
OCLN	ENSG00000197822	5	3	2	0.0455373
PDHX	ENSG00000110435	11	3	3	0.0455373
PEPD	ENSG00000124299	19	3	3	0.0455373
PEX16	ENSG00000121680	11	3	3	0.0455373
PHF6	ENSG00000156531	X	3	3	0.0455373
PIBF1	ENSG00000083535	13	3	1	0.0455373
PIGW	ENSG00000277161	17	3	1	0.0455373
PNP	ENSG00000198805	14	3	2	0.0455373
POC1A	ENSG00000164087	3	3	1	0.0455373
POU1F1	ENSG00000064835	3	3	2	0.0455373
PPARG	ENSG00000132170	3	3	2	0.0455373
PPP2R1A	ENSG00000105568	19	3	3	0.0455373
PRORP	ENSG00000100890	14	3	1	0.0455373
PRSS12	ENSG00000164099	4	3	2	0.0455373
PSAT1	ENSG00000135069	9	3	2	0.0455373
PSEN2	ENSG00000143801	1	3	2	0.0455373
PTS	ENSG00000150787	11	3	3	0.0455373
PUS1	ENSG00000177192	12	3	1	0.0455373
RAC1	ENSG00000136238	7	3	2	0.0455373
RFT1	ENSG00000163933	3	3	2	0.0455373
RNASEH2C	ENSG00000172922	11	3	2	0.0455373
RTTN	ENSG00000176225	18	3	1	0.0455373
RUBCN	ENSG00000145016	3	3	1	0.0455373
SAG	ENSG00000130561	2	3	2	0.0455373
SARS2	ENSG00000104835	19	3	1	0.0455373
SCN4A	ENSG00000007314	17	3	3	0.0455373
SCN8A	ENSG00000196876	12	3	3	0.0455373
SEMA4A	ENSG00000196189	1	3	1	0.0455373
SLC25A20	ENSG00000178537	3	3	3	0.0455373
SLC2A1	ENSG00000117394	1	3	2	0.0455373
SLC45A1	ENSG00000162426	1	3	1	0.0455373
SLC46A1	ENSG00000076351	17	3	2	0.0455373
SLC7A14	ENSG00000013293	3	3	1	0.0455373
SLC7A7	ENSG00000155465	14	3	3	0.0455373
SNAP29	ENSG00000099940	22	3	1	0.0455373
SOS1	ENSG00000115904	2	3	3	0.0455373
SOX5	ENSG00000134532	12	3	3	0.0455373
SPAST	ENSG00000021574	2	3	1	0.0455373
SRCAP	ENSG00000080603	16	3	2	0.0455373
SRD5A3	ENSG00000128039	4	3	1	0.0455373
STAMBP	ENSG00000124356	2	3	2	0.0455373
SUMF1	ENSG00000144455	3	3	3	0.0455373
SUOX	ENSG00000139531	12	3	3	0.0455373
SUV420H1	ENSG00000110066	11	3	6	0.0455373
TBL1XR1	ENSG00000177565	3	3	3	0.0455373
TBR1	ENSG00000136535	2	3	1	0.0455373
TCTN1	ENSG00000204852	12	3	1	0.0455373
TDP2	ENSG00000111802	6	3	1	0.0455373
TGIF1	ENSG00000177426	18	3	2	0.0455373
TNR	ENSG00000116147	1	3	1	0.0455373
TSEN2	ENSG00000154743	3	3	2	0.0455373
UMPS	ENSG00000114491	3	3	1	0.0455373
UPF3B	ENSG00000125351	X	3	2	0.0455373
USP9X	ENSG00000124486	X	3	2	0.0455373
WDPCP	ENSG00000143951	2	3	1	0.0455373
WDR11	ENSG00000120008	10	3	2	0.0455373
XPC	ENSG00000154767	3	3	3	0.0455373
YWHAG	ENSG00000170027	7	3	3	0.0455373
AARS1	ENSG00000090861	16	2	2	0.0303582
ABCC9	ENSG00000069431	12	2	2	0.0303582
ACSL4	ENSG00000068366	X	2	1	0.0303582
ACTA1	ENSG00000143632	1	2	2	0.0303582
ADAMTSL2	ENSG00000197859	9	2	2	0.0303582
ADCY5	ENSG00000173175	3	2	2	0.0303582
AGA	ENSG00000038002	4	2	2	0.0303582
AGBL5	ENSG00000084693	2	2	1	0.0303582
AHSG	ENSG00000145192	3	2	1	0.0303582
AIFM1	ENSG00000156709	X	2	2	0.0303582
AIMP1	ENSG00000164022	4	2	1	0.0303582
ALG3	ENSG00000214160	3	2	1	0.0303582
AP1G1	ENSG00000166747	16	2	2	0.0303582
ARID1A	ENSG00000117713	1	2	2	0.0303582
ASH1L	ENSG00000116539	1	2	1	0.0303582
ATL1	ENSG00000198513	14	2	2	0.0303582
ATN1	ENSG00000111676	12	2	2	0.0303582
ATP13A2	ENSG00000159363	1	2	2	0.0303582
ATP8A2	ENSG00000132932	13	2	1	0.0303582
B3GALT6	ENSG00000176022	1	2	2	0.0303582
BUB1B	ENSG00000156970	15	2	2	0.0303582
C12orf57	ENSG00000111678	12	2	2	0.0303582
CACNA1D	ENSG00000157388	3	2	1	0.0303582
CACNA1E	ENSG00000198216	1	2	2	0.0303582
CACNG7	ENSG00000105605	19	2	3	0.0303582
CANT1	ENSG00000171302	17	2	2	0.0303582
CASR	ENSG00000036828	3	2	2	0.0303582
CBL	ENSG00000110395	11	2	2	0.0303582
CCDC115	ENSG00000136710	2	2	1	0.0303582
CDH15	ENSG00000129910	16	2	1	0.0303582
CHAMP1	ENSG00000198824	13	2	1	0.0303582
CHD4	ENSG00000111642	12	2	2	0.0303582
CHD8	ENSG00000100888	14	2	2	0.0303582
CLCN4	ENSG00000073464	X	2	2	0.0303582
CLIC2	ENSG00000155962	X	2	1	0.0303582
CLTC	ENSG00000141367	17	2	4	0.0303582
COG8	ENSG00000213380	16	2	2	0.0303582
COLQ	ENSG00000206561	3	2	2	0.0303582
COPB2	ENSG00000184432	3	2	2	0.0303582
COQ4	ENSG00000167113	9	2	1	0.0303582
CWF19L1	ENSG00000095485	10	2	2	0.0303582
CYFIP2	ENSG00000055163	5	2	2	0.0303582
D2HGDH	ENSG00000180902	2	2	2	0.0303582
DCX	ENSG00000077279	X	2	2	0.0303582
DICER1	ENSG00000100697	14	2	2	0.0303582
DMXL2	ENSG00000104093	15	2	1	0.0303582
DNMT3B	ENSG00000088305	20	2	2	0.0303582
DPYSL5	ENSG00000157851	2	2	1	0.0303582
DSG4	ENSG00000175065	18	2	2	0.0303582
EDEM3	ENSG00000116406	1	2	2	0.0303582
ELN	ENSG00000049540	7	2	1	0.0303582
ESCO2	ENSG00000171320	8	2	2	0.0303582
ETFB	ENSG00000105379	19	2	2	0.0303582
ETHE1	ENSG00000105755	19	2	1	0.0303582
EVC	ENSG00000072840	4	2	2	0.0303582
EXTL3	ENSG00000012232	8	2	1	0.0303582
FANCF	ENSG00000183161	11	2	2	0.0303582
FDXR	ENSG00000161513	17	2	2	0.0303582
FGF13	ENSG00000129682	X	2	2	0.0303582
FGFR2	ENSG00000066468	10	2	2	0.0303582
FKTN	ENSG00000106692	9	2	2	0.0303582
FOXI1	ENSG00000168269	5	2	1	0.0303582
FREM2	ENSG00000150893	13	2	2	0.0303582
GABBR2	ENSG00000136928	9	2	1	0.0303582
GABRB3	ENSG00000166206	15	2	2	0.0303582
GABRG2	ENSG00000113327	5	2	2	0.0303582
GALE	ENSG00000117308	1	2	3	0.0303582
GBA2	ENSG00000070610	9	2	2	0.0303582
GJC2	ENSG00000198835	1	2	1	0.0303582
GNAS	ENSG00000087460	20	2	2	0.0303582
GPHN	ENSG00000171723	14	2	1	0.0303582
GRN	ENSG00000030582	17	2	2	0.0303582
H3-3A	ENSG00000163041	1	2	2	0.0303582
HADH	ENSG00000138796	4	2	1	0.0303582
HIVEP2	ENSG00000010818	6	2	2	0.0303582
HK1	ENSG00000156515	10	2	1	0.0303582
HNF4A	ENSG00000101076	20	2	2	0.0303582
HRAS	ENSG00000174775	11	2	2	0.0303582
INTS1	ENSG00000164880	7	2	2	0.0303582
INVS	ENSG00000119509	9	2	1	0.0303582
KCNC1	ENSG00000129159	11	2	2	0.0303582
KDM5C	ENSG00000126012	X	2	1	0.0303582
KDM6A	ENSG00000147050	X	2	2	0.0303582
KIAA1279	ENSG00000198954	10	2	2	0.0303582
KIAA2022	ENSG00000050030	X	2	4	0.0303582
KIF1B	ENSG00000054523	1	2	1	0.0303582
KIF7	ENSG00000166813	15	2	3	0.0303582
KIFBP	ENSG00000198954	10	2	2	0.0303582
KIT	ENSG00000157404	4	2	2	0.0303582
LCA5	ENSG00000135338	6	2	2	0.0303582
LONP1	ENSG00000196365	19	2	2	0.0303582
LSS	ENSG00000160285	21	2	2	0.0303582
MASP1	ENSG00000127241	3	2	2	0.0303582
MED17	ENSG00000042429	11	2	2	0.0303582
MERTK	ENSG00000153208	2	2	1	0.0303582
MN1	ENSG00000169184	22	2	2	0.0303582
MPDZ	ENSG00000107186	9	2	2	0.0303582
MRAP	ENSG00000170262	21	2	1	0.0303582
MRPS22	ENSG00000175110	3	2	2	0.0303582
MTO1	ENSG00000135297	6	2	2	0.0303582
NDP	ENSG00000124479	X	2	1	0.0303582
NDUFAF6	ENSG00000156170	8	2	2	0.0303582
NDUFS1	ENSG00000023228	2	2	2	0.0303582
NDUFS4	ENSG00000164258	5	2	2	0.0303582
NEDD4L	ENSG00000049759	18	2	2	0.0303582
NEMF	ENSG00000165525	14	2	2	0.0303582
NEXMIF	ENSG00000050030	X	2	4	0.0303582
NFIA	ENSG00000162599	1	2	2	0.0303582
NFU1	ENSG00000169599	2	2	2	0.0303582
NIPBL	ENSG00000164190	5	2	2	0.0303582
NR2F1	ENSG00000175745	5	2	2	0.0303582
NT5C2	ENSG00000076685	10	2	1	0.0303582
OTUD5	ENSG00000068308	X	2	1	0.0303582
OTUD6B	ENSG00000155100	8	2	1	0.0303582
PARN	ENSG00000140694	16	2	2	0.0303582
PBX1	ENSG00000185630	1	2	1	0.0303582
PCYT2	ENSG00000185813	17	2	1	0.0303582
PDE10A	ENSG00000112541	6	2	1	0.0303582
PDHA1	ENSG00000131828	X	2	2	0.0303582
PEX2	ENSG00000164751	8	2	2	0.0303582
PEX26	ENSG00000215193	22	2	2	0.0303582
PGAP2	ENSG00000148985	11	2	2	0.0303582
PIGQ	ENSG00000007541	16	2	1	0.0303582
PLEKHG2	ENSG00000090924	19	2	1	0.0303582
PLXNA1	ENSG00000114554	3	2	2	0.0303582
POLR2A	ENSG00000181222	17	2	2	0.0303582
PRDM16	ENSG00000142611	1	2	1	0.0303582
PRKCG	ENSG00000126583	19	2	3	0.0303582
PSEN1	ENSG00000080815	14	2	2	0.0303582
PSPH	ENSG00000146733	7	2	1	0.0303582
PTRH2	ENSG00000141378	17	2	4	0.0303582
QARS1	ENSG00000172053	3	2	3	0.0303582
RAB11B	ENSG00000185236	19	2	1	0.0303582
RAB18	ENSG00000099246	10	2	1	0.0303582
RAB3GAP2	ENSG00000118873	1	2	2	0.0303582
RAD51	ENSG00000051180	15	2	1	0.0303582
RNASEH2A	ENSG00000104889	19	2	3	0.0303582
RNF213	ENSG00000173821	17	2	2	0.0303582
ROR2	ENSG00000169071	9	2	2	0.0303582
RTN4IP1	ENSG00000130347	6	2	1	0.0303582
SBF1	ENSG00000100241	22	2	2	0.0303582
SCUBE3	ENSG00000146197	6	2	2	0.0303582
SETD2	ENSG00000181555	3	2	1	0.0303582
SLC12A2	ENSG00000064651	5	2	2	0.0303582
SLC12A6	ENSG00000140199	15	2	2	0.0303582
SLC16A2	ENSG00000147100	X	2	2	0.0303582
SLC18A2	ENSG00000165646	10	2	2	0.0303582
SLC1A4	ENSG00000115902	2	2	1	0.0303582
SLC25A15	ENSG00000102743	13	2	1	0.0303582
SLC35A1	ENSG00000164414	6	2	3	0.0303582
SLC5A6	ENSG00000138074	2	2	1	0.0303582
SLX4	ENSG00000188827	16	2	1	0.0303582
SMO	ENSG00000128602	7	2	1	0.0303582
SMS	ENSG00000102172	X	2	2	0.0303582
SNAP25	ENSG00000132639	20	2	2	0.0303582
SNIP1	ENSG00000163877	1	2	1	0.0303582
SPART	ENSG00000133104	13	2	1	0.0303582
SPECC1L	ENSG00000100014	22	2	1	0.0303582
SPG21	ENSG00000090487	15	2	1	0.0303582
SPOP	ENSG00000121067	17	2	2	0.0303582
SPRED2	ENSG00000198369	2	2	1	0.0303582
STAC3	ENSG00000185482	12	2	2	0.0303582
SYN1	ENSG00000008056	X	2	2	0.0303582
TBCD	ENSG00000141556	17	2	2	0.0303582
TBCE	ENSG00000284770	1	2	3	0.0303582
TBCE	ENSG00000285053	1	2	3	0.0303582
TDGF1	ENSG00000241186	3	2	1	0.0303582
TECPR2	ENSG00000196663	14	2	1	0.0303582
TFG	ENSG00000114354	3	2	1	0.0303582
TGFB1	ENSG00000105329	19	2	2	0.0303582
THRA	ENSG00000126351	17	2	2	0.0303582
TLK2	ENSG00000146872	17	2	2	0.0303582
TMEM138	ENSG00000149483	11	2	2	0.0303582
TMEM237	ENSG00000155755	2	2	1	0.0303582
TMX2	ENSG00000213593	11	2	1	0.0303582
TOE1	ENSG00000132773	1	2	2	0.0303582
TRAF3IP1	ENSG00000204104	2	2	1	0.0303582
TRIM37	ENSG00000108395	17	2	1	0.0303582
TRIP13	ENSG00000071539	5	2	2	0.0303582
TUB	ENSG00000166402	11	2	2	0.0303582
TUBG1	ENSG00000131462	17	2	1	0.0303582
UGP2	ENSG00000169764	2	2	1	0.0303582
USH1G	ENSG00000182040	17	2	2	0.0303582
VPS37A	ENSG00000155975	8	2	1	0.0303582
VPS4A	ENSG00000132612	16	2	2	0.0303582
WRAP53	ENSG00000141499	17	2	1	0.0303582
WT1	ENSG00000184937	11	2	2	0.0303582
YIF1B	ENSG00000167645	19	2	1	0.0303582
ZC4H2	ENSG00000126970	X	2	2	0.0303582
ZEB2	ENSG00000169554	2	2	2	0.0303582
ZMIZ1	ENSG00000108175	10	2	2	0.0303582
ZNF408	ENSG00000175213	11	2	1	0.0303582
ZNF513	ENSG00000163795	2	2	1	0.0303582
ABCB7	ENSG00000131269	X	1	1	0.0151791
ABHD5	ENSG00000011198	3	1	1	0.0151791
ACBD6	ENSG00000230124	1	1	1	0.0151791
ACD	ENSG00000102977	16	1	1	0.0151791
ADAMTS10	ENSG00000142303	19	1	1	0.0151791
AFF3	ENSG00000144218	2	1	1	0.0151791
AGO2	ENSG00000123908	8	1	1	0.0151791
AKT3	ENSG00000117020	1	1	1	0.0151791
ALDH6A1	ENSG00000119711	14	1	1	0.0151791
ALG13	ENSG00000101901	X	1	1	0.0151791
ALG2	ENSG00000119523	9	1	1	0.0151791
ANKH	ENSG00000154122	5	1	1	0.0151791
AP2S1	ENSG00000042753	19	1	1	0.0151791
ARF1	ENSG00000143761	1	1	1	0.0151791
ARFGEF1	ENSG00000066777	8	1	1	0.0151791
ARG1	ENSG00000118520	6	1	1	0.0151791
ARHGEF18	ENSG00000104880	19	1	1	0.0151791
ARNT2	ENSG00000172379	15	1	1	0.0151791
ASTN1	ENSG00000152092	1	1	1	0.0151791
ATAD3A	ENSG00000197785	1	1	1	0.0151791
ATIC	ENSG00000138363	2	1	1	0.0151791
ATP1A1	ENSG00000163399	1	1	1	0.0151791
ATP1A2	ENSG00000018625	1	1	1	0.0151791
ATP2A2	ENSG00000174437	12	1	1	0.0151791
BBIP1	ENSG00000214413	10	1	1	0.0151791
BCKDK	ENSG00000103507	16	1	2	0.0151791
BCORL1	ENSG00000085185	X	1	1	0.0151791
BMP4	ENSG00000125378	14	1	1	0.0151791
BOLA3	ENSG00000163170	2	1	1	0.0151791
BSCL2	ENSG00000168000	11	1	1	0.0151791
CA4	ENSG00000167434	17	1	1	0.0151791
CACNA1B	ENSG00000148408	9	1	1	0.0151791
CACNA1G	ENSG00000006283	17	1	1	0.0151791
CACNA2D2	ENSG00000007402	3	1	1	0.0151791
CAD	ENSG00000084774	2	1	1	0.0151791
CAMK2A	ENSG00000070808	5	1	1	0.0151791
CAPZA2	ENSG00000198898	7	1	1	0.0151791
CARS2	ENSG00000134905	13	1	1	0.0151791
CCDC88C	ENSG00000015133	14	1	1	0.0151791
CCNA2	ENSG00000145386	4	1	2	0.0151791
CCND2	ENSG00000118971	12	1	1	0.0151791
CDK10	ENSG00000185324	16	1	1	0.0151791
CDK8	ENSG00000132964	13	1	1	0.0151791
CEP85L	ENSG00000111860	6	1	1	0.0151791
CKAP2L	ENSG00000169607	2	1	1	0.0151791
CLP1	ENSG00000172409	11	1	1	0.0151791
CNKSR2	ENSG00000149970	X	1	1	0.0151791
COA8	ENSG00000256053	14	1	1	0.0151791
COASY	ENSG00000068120	17	1	1	0.0151791
COG6	ENSG00000133103	13	1	1	0.0151791
COL13A1	ENSG00000197467	10	1	1	0.0151791
COL9A2	ENSG00000049089	1	1	1	0.0151791
COL9A3	ENSG00000092758	20	1	1	0.0151791
COQ2	ENSG00000173085	4	1	1	0.0151791
COX14	ENSG00000178449	12	1	1	0.0151791
CPE	ENSG00000109472	4	1	1	0.0151791
CRLF1	ENSG00000006016	19	1	1	0.0151791
CSDE1	ENSG00000009307	1	1	2	0.0151791
CTBP1	ENSG00000159692	4	1	1	0.0151791
CTNND1	ENSG00000198561	11	1	1	0.0151791
CTSF	ENSG00000174080	11	1	1	0.0151791
CUL4B	ENSG00000158290	X	1	1	0.0151791
CUX2	ENSG00000111249	12	1	1	0.0151791
DARS1	ENSG00000115866	2	1	1	0.0151791
DCC	ENSG00000187323	18	1	1	0.0151791
DDB1	ENSG00000167986	11	1	1	0.0151791
DEAF1	ENSG00000177030	11	1	1	0.0151791
DEGS1	ENSG00000143753	1	1	1	0.0151791
DIAPH1	ENSG00000131504	5	1	1	0.0151791
DLL3	ENSG00000090932	19	1	1	0.0151791
DPM1	ENSG00000000419	20	1	1	0.0151791
DPM2	ENSG00000136908	9	1	1	0.0151791
DYM	ENSG00000141627	18	1	1	0.0151791
DYNC1I2	ENSG00000077380	2	1	1	0.0151791
ECE1	ENSG00000117298	1	1	1	0.0151791
EDNRB	ENSG00000136160	13	1	1	0.0151791
EIF2AK3	ENSG00000172071	2	1	1	0.0151791
EMC10	ENSG00000161671	19	1	1	0.0151791
ERBB4	ENSG00000178568	2	1	1	0.0151791
ERCC1	ENSG00000012061	19	1	1	0.0151791
ERCC8	ENSG00000049167	5	1	1	0.0151791
EXOSC9	ENSG00000123737	4	1	1	0.0151791
EZH2	ENSG00000106462	7	1	1	0.0151791
FRRS1L	ENSG00000260230	9	1	1	0.0151791
GABRB1	ENSG00000163288	4	1	1	0.0151791
GABRB2	ENSG00000145864	5	1	1	0.0151791
GAD1	ENSG00000128683	2	1	1	0.0151791
GCSH	ENSG00000140905	16	1	1	0.0151791
GJA1	ENSG00000152661	6	1	1	0.0151791
GK	ENSG00000198814	X	1	1	0.0151791
GLIS3	ENSG00000107249	9	1	1	0.0151791
GLYCTK	ENSG00000168237	3	1	1	0.0151791
GP1BB	ENSG00000203618	22	1	1	0.0151791
GPC3	ENSG00000147257	X	1	1	0.0151791
GPT2	ENSG00000166123	16	1	1	0.0151791
GRIA1	ENSG00000155511	5	1	1	0.0151791
GRIA3	ENSG00000125675	X	1	1	0.0151791
GRIN2D	ENSG00000105464	19	1	1	0.0151791
GSS	ENSG00000100983	20	1	1	0.0151791
GTF2H5	ENSG00000272047	6	1	1	0.0151791
HEPACAM	ENSG00000165478	11	1	1	0.0151791
HNF1B	ENSG00000275410	17	1	1	0.0151791
HNRNPK	ENSG00000165119	9	1	1	0.0151791
HNRNPR	ENSG00000125944	1	1	1	0.0151791
HSD17B10	ENSG00000072506	X	1	1	0.0151791
HSPG2	ENSG00000142798	1	1	1	0.0151791
IBA57	ENSG00000181873	1	1	1	0.0151791
INS	ENSG00000254647	11	1	2	0.0151791
INSR	ENSG00000171105	19	1	1	0.0151791
IRF2BPL	ENSG00000119669	14	1	1	0.0151791
ITGB3	ENSG00000259207	17	1	1	0.0151791
ITSN1	ENSG00000205726	21	1	1	0.0151791
KAT8	ENSG00000103510	16	1	2	0.0151791
KCNAB2	ENSG00000069424	1	1	2	0.0151791
KCNK3	ENSG00000171303	2	1	1	0.0151791
KCNT2	ENSG00000162687	1	1	1	0.0151791
KCTD3	ENSG00000136636	1	1	2	0.0151791
KDM2B	ENSG00000089094	12	1	1	0.0151791
KDM6B	ENSG00000132510	17	1	1	0.0151791
KIAA1109	ENSG00000138688	4	1	1	0.0151791
KIDINS220	ENSG00000134313	2	1	1	0.0151791
KIF11	ENSG00000138160	10	1	1	0.0151791
KIF5A	ENSG00000155980	12	1	1	0.0151791
KLLN	ENSG00000227268	10	1	2	0.0151791
KMT2E	ENSG00000005483	7	1	1	0.0151791
KRAS	ENSG00000133703	12	1	1	0.0151791
KYNU	ENSG00000115919	2	1	1	0.0151791
LAMC3	ENSG00000050555	9	1	1	0.0151791
LAS1L	ENSG00000001497	X	1	1	0.0151791
LBR	ENSG00000143815	1	1	1	0.0151791
LDHD	ENSG00000166816	16	1	1	0.0151791
LGI4	ENSG00000153902	19	1	1	0.0151791
LHX4	ENSG00000121454	1	1	1	0.0151791
LIPT2	ENSG00000175536	11	1	1	0.0151791
LRP2	ENSG00000081479	2	1	1	0.0151791
LZTFL1	ENSG00000163818	3	1	1	0.0151791
MAP1B	ENSG00000131711	5	1	1	0.0151791
MAP3K7	ENSG00000135341	6	1	1	0.0151791
MAPK1	ENSG00000100030	22	1	1	0.0151791
MARS2	ENSG00000247626	2	1	1	0.0151791
MCM4	ENSG00000104738	8	1	1	0.0151791
MCOLN1	ENSG00000090674	19	1	1	0.0151791
MED23	ENSG00000112282	6	1	1	0.0151791
MEIS2	ENSG00000134138	15	1	1	0.0151791
MLYCD	ENSG00000103150	16	1	1	0.0151791
MMADHC	ENSG00000168288	2	1	1	0.0151791
MOGS	ENSG00000115275	2	1	1	0.0151791
MPLKIP	ENSG00000168303	7	1	1	0.0151791
MRPS2	ENSG00000122140	9	1	1	0.0151791
NACC1	ENSG00000160877	19	1	1	0.0151791
NANS	ENSG00000095380	9	1	1	0.0151791
NCAPD3	ENSG00000151503	11	1	1	0.0151791
NCOR1	ENSG00000141027	17	1	1	0.0151791
NDUFAF1	ENSG00000137806	15	1	1	0.0151791
NDUFS3	ENSG00000213619	11	1	1	0.0151791
NDUFS8	ENSG00000110717	11	1	1	0.0151791
NKX2-1	ENSG00000136352	14	1	1	0.0151791
NODAL	ENSG00000156574	10	1	1	0.0151791
NOTCH1	ENSG00000148400	9	1	1	0.0151791
NPR2	ENSG00000159899	9	1	1	0.0151791
NRAS	ENSG00000213281	1	1	2	0.0151791
NRXN1	ENSG00000179915	2	1	1	0.0151791
NSMCE3	ENSG00000185115	15	1	1	0.0151791
NTRK1	ENSG00000198400	1	1	1	0.0151791
OPA3	ENSG00000125741	19	1	1	0.0151791
PAM16	ENSG00000217930	16	1	1	0.0151791
PAX2	ENSG00000075891	10	1	1	0.0151791
PCGF2	ENSG00000277258	17	1	1	0.0151791
PCK1	ENSG00000124253	20	1	1	0.0151791
PCYT1A	ENSG00000161217	3	1	1	0.0151791
PDHB	ENSG00000168291	3	1	1	0.0151791
PEX19	ENSG00000162735	1	1	1	0.0151791
PGAP1	ENSG00000197121	2	1	1	0.0151791
PGM1	ENSG00000079739	1	1	1	0.0151791
PIGA	ENSG00000165195	X	1	1	0.0151791
PIGB	ENSG00000069943	15	1	2	0.0151791
PIGH	ENSG00000100564	14	1	1	0.0151791
PIGK	ENSG00000142892	1	1	1	0.0151791
PIK3CA	ENSG00000121879	3	1	1	0.0151791
PISD	ENSG00000241878	22	1	1	0.0151791
PITX3	ENSG00000107859	10	1	1	0.0151791
PLK4	ENSG00000142731	4	1	1	0.0151791
PLOD3	ENSG00000106397	7	1	1	0.0151791
PLP1	ENSG00000123560	X	1	1	0.0151791
PLPBP	ENSG00000147471	8	1	1	0.0151791
PMPCA	ENSG00000165688	9	1	1	0.0151791
PMPCB	ENSG00000105819	7	1	1	0.0151791
POMGNT2	ENSG00000144647	3	1	1	0.0151791
POMK	ENSG00000185900	8	1	1	0.0151791
POU3F3	ENSG00000198914	2	1	1	0.0151791
PPP1CB	ENSG00000213639	2	1	1	0.0151791
PRKRA	ENSG00000180228	2	1	1	0.0151791
PRUNE1	ENSG00000143363	1	1	1	0.0151791
PTCH2	ENSG00000117425	1	1	1	0.0151791
PYCR2	ENSG00000143811	1	1	1	0.0151791
QRICH1	ENSG00000198218	3	1	2	0.0151791
RAB3GAP1	ENSG00000115839	2	1	1	0.0151791
RABL6	ENSG00000196642	9	1	1	0.0151791
RAF1	ENSG00000132155	3	1	1	0.0151791
RASA1	ENSG00000145715	5	1	1	0.0151791
RB1	ENSG00000139687	13	1	1	0.0151791
RDH11	ENSG00000072042	14	1	1	0.0151791
RERE	ENSG00000142599	1	1	1	0.0151791
RIT1	ENSG00000143622	1	1	1	0.0151791
RORA	ENSG00000069667	15	1	1	0.0151791
RORB	ENSG00000198963	9	1	1	0.0151791
RP2	ENSG00000102218	X	1	1	0.0151791
RUSC2	ENSG00000198853	9	1	1	0.0151791
SAMD9	ENSG00000205413	7	1	1	0.0151791
SATB1	ENSG00000182568	3	1	1	0.0151791
SCN3A	ENSG00000153253	2	1	1	0.0151791
SCYL1	ENSG00000142186	11	1	1	0.0151791
SDCCAG8	ENSG00000054282	1	1	1	0.0151791
SFXN4	ENSG00000183605	10	1	1	0.0151791
SHANK2	ENSG00000162105	11	1	1	0.0151791
SHMT2	ENSG00000182199	12	1	1	0.0151791
SIM2	ENSG00000159263	21	1	2	0.0151791
SLC16A1	ENSG00000155380	1	1	1	0.0151791
SLC1A2	ENSG00000110436	11	1	1	0.0151791
SLC25A19	ENSG00000125454	17	1	1	0.0151791
SLC2A2	ENSG00000163581	3	1	1	0.0151791
SLC35A3	ENSG00000117620	1	1	1	0.0151791
SLC6A3	ENSG00000142319	5	1	1	0.0151791
SLC6A9	ENSG00000196517	1	1	1	0.0151791
SMARCA4	ENSG00000127616	19	1	1	0.0151791
SMARCB1	ENSG00000099956	22	1	1	0.0151791
SMARCC2	ENSG00000139613	12	1	1	0.0151791
SMARCD1	ENSG00000066117	12	1	1	0.0151791
SMARCE1	ENSG00000073584	17	1	1	0.0151791
SMPD4	ENSG00000136699	2	1	1	0.0151791
SNX27	ENSG00000143376	1	1	1	0.0151791
SOS2	ENSG00000100485	14	1	1	0.0151791
SOST	ENSG00000167941	17	1	1	0.0151791
SPEN	ENSG00000065526	1	1	1	0.0151791
STAG1	ENSG00000118007	3	1	1	0.0151791
STX1B	ENSG00000099365	16	1	1	0.0151791
SUFU	ENSG00000107882	10	1	1	0.0151791
TAF1	ENSG00000147133	X	1	1	0.0151791
TANC2	ENSG00000170921	17	1	1	0.0151791
TANGO2	ENSG00000183597	22	1	1	0.0151791
TARS2	ENSG00000143374	1	1	1	0.0151791
TBX1	ENSG00000184058	22	1	1	0.0151791
TCF12	ENSG00000140262	15	1	1	0.0151791
TCF20	ENSG00000100207	22	1	1	0.0151791
TCOF1	ENSG00000070814	5	1	1	0.0151791
TCTN2	ENSG00000168778	12	1	1	0.0151791
TCTN3	ENSG00000119977	10	1	1	0.0151791
TET3	ENSG00000187605	2	1	1	0.0151791
TFE3	ENSG00000068323	X	1	1	0.0151791
TGM6	ENSG00000166948	20	1	1	0.0151791
THRB	ENSG00000151090	3	1	1	0.0151791
TK2	ENSG00000166548	16	1	1	0.0151791
TMEM94	ENSG00000177728	17	1	1	0.0151791
TNPO2	ENSG00000105576	19	1	1	0.0151791
TP53	ENSG00000141510	17	1	1	0.0151791
TPR	ENSG00000047410	1	1	1	0.0151791
TRAF7	ENSG00000131653	16	1	1	0.0151791
TRAIP	ENSG00000183763	3	1	1	0.0151791
TRAPPC2	ENSG00000196459	X	1	2	0.0151791
TRAPPC6B	ENSG00000182400	14	1	1	0.0151791
TREM2	ENSG00000095970	6	1	1	0.0151791
TRPM3	ENSG00000083067	9	1	1	0.0151791
TRPV4	ENSG00000111199	12	1	1	0.0151791
TRRAP	ENSG00000196367	7	1	1	0.0151791
TTC5	ENSG00000136319	14	1	1	0.0151791
TUBB	ENSG00000196230	6	1	1	0.0151791
TUSC3	ENSG00000104723	8	1	1	0.0151791
TWNK	ENSG00000107815	10	1	1	0.0151791
TXN2	ENSG00000100348	22	1	1	0.0151791
UBE2A	ENSG00000077721	X	1	1	0.0151791
UBTF	ENSG00000108312	17	1	1	0.0151791
UFSP2	ENSG00000109775	4	1	1	0.0151791
VAMP1	ENSG00000139190	12	1	1	0.0151791
VIPAS39	ENSG00000151445	14	1	1	0.0151791
VPS33B	ENSG00000184056	15	1	1	0.0151791
VPS41	ENSG00000006715	7	1	1	0.0151791
VPS53	ENSG00000141252	17	1	1	0.0151791
VRK1	ENSG00000100749	14	1	1	0.0151791
WASF1	ENSG00000112290	6	1	1	0.0151791
WDR26	ENSG00000162923	1	1	1	0.0151791
WDR37	ENSG00000047056	10	1	1	0.0151791
ZBTB20	ENSG00000181722	3	1	1	0.0151791
ZDHHC15	ENSG00000102383	X	1	1	0.0151791
ZDHHC9	ENSG00000188706	X	1	1	0.0151791
ZIC2	ENSG00000043355	13	1	1	0.0151791
ZNF292	ENSG00000188994	6	1	1	0.0151791
ZNF462	ENSG00000148143	9	1	1	0.0151791
ZNHIT3	ENSG00000273611	17	1	1	0.0151791
ZSWIM6	ENSG00000130449	5	1	1	0.0151791
