# Supplementary material for: Developing a cluster-based approach for deciphering complexity in individuals with neurodevelopmental differences
Source: Front Pediatr. 2023 Sep 18;11:1171920. doi: 10.3389/fped.2023.1171920 (PMC10543689; doi:10.3389/fped.2023.1171920)
Supplement: Supplementary file 2 [file Table2.xlsx]

## Sheet: Breakdown of specific seizure
HPO term	Phenotype	# of all GDD	% of all GDD
HP:0001250	Seizure	796	12.08
HP:0002197	Generalized-onset seizure	178	2.70
HP:0002121	Generalized non-motor (absence) seizure	121	1.84
HP:0002069	Bilateral tonic-clonic seizure	108	1.64
HP:0011097	Epileptic spasm	93	1.41
HP:0002373	Febrile seizure (within the age range of 3 months to 6 years)	81	1.23
HP:0002123	Generalized myoclonic seizure	75	1.14
HP:0007359	Focal-onset seizure	46	0.70
HP:0002384	Focal impaired awareness seizure	27	0.41
HP:0010819	Atonic seizure	17	0.26
HP:0010818	Generalized tonic seizure	15	0.23
HP:0002133	Status epilepticus	14	0.21
HP:0011171	Simple febrile seizure	11	0.17
HP:0011169	Generalized clonic seizure	10	0.15
HP:0011172	Complex febrile seizure	9	0.14
HP:0011166	Focal myoclonic seizure	9	0.14
HP:0002349	Focal aware seizure	8	0.12
HP:0011147	Typical absence seizure	7	0.11
HP:0011153	Focal motor seizure	7	0.11
HP:0002266	Focal clonic seizure	6	0.09
HP:0011170	Generalized myoclonic-atonic seizure	6	0.09
HP:0011152	Early onset absence seizures	6	0.09
HP:0007334	Bilateral tonic-clonic seizure with focal onset	5	0.08
HP:0010821	Focal emotional seizure with laughing	4	0.06
HP:0011167	Focal tonic seizure	4	0.06
HP:0011146	Dialeptic seizure	4	0.06
HP:0011145	Symptomatic seizures	4	0.06
HP:0007270	Atypical absence seizure	3	0.05
HP:0007207	Photosensitive tonic-clonic seizure	3	0.05
HP:0011150	Myoclonic absence seizure	3	0.05
HP:0100622	Maternal seizure	2	0.03
HP:0007193	Generalized tonic-clonic seizures on awakening	2	0.03
HP:0012469	Infantile spasms	2	0.03
HP:0002173	Hypoglycemic seizures	2	0.03
HP:0011151	Atypical absence status epilepticus	1	0.02
HP:0006813	Focal hemiclonic seizure	1	0.02
HP:0032755	Focal impaired awareness autonomic seizure	1	0.02
HP:0011154	Focal autonomic seizure	1	0.02
HP:0011149	Absence seizure with eyelid myoclonia	1	0.02
HP:0002199	Hypocalcemic seizures	1	0.02
