# Supplementary material for: Developing a cluster-based approach for deciphering complexity in individuals with neurodevelopmental differences
Source: Front Pediatr. 2023 Sep 18;11:1171920. doi: 10.3389/fped.2023.1171920 (PMC10543689; doi:10.3389/fped.2023.1171920)
Supplement: Supplementary file 3 [file Table3.xlsx]

## Sheet: Morphological phenotypes >1%
Morphological Phenotype	# of all GDD	% of all GDD
Nervous system
Delayed CNS myelination	104	1.58
Ventriculomegaly	90	1.36
Hypoplasia of the corpus callosum	88	1.33
Agenesis of corpus callosum	68	1.03
Head
Microcephaly	997	15.11
Abnormal facial shape	427	6.47
Brachycephaly	273	4.14
Macrocephaly	236	3.58
Plagiocephaly	210	3.18
Micrognathia	159	2.41
Postnatal microcephaly	130	1.97
Frontal bossing	115	1.74
Congenital microcephaly	100	1.52
Progressive microcephaly	93	1.41
Highly arched eyebrow	92	1.39
Prominent metopic ridge	80	1.21
Low anterior hairline	73	1.11
Relative macrocephaly	71	1.08
Face
Broad forehead	137	2.08
Prominent forehead	128	1.94
Mandibular prognathia	111	1.68
Malar flattening	108	1.64
Coarse facial features	96	1.45
Facial asymmetry	77	1.17
Frontal upsweep of hair	71	1.08
Full cheeks	66	1.00
Eye
Hypertelorism	444	6.73
Epicanthus	415	6.29
Deeply set eye	340	5.15
Downslanted palpebral fissures	299	4.53
Upslanted palpebral fissure	287	4.35
Synophrys	151	2.29
Long eyelashes	114	1.73
Long palpebral fissure	106	1.61
Blepharophimosis	99	1.50
Hypotelorism	76	1.15
Thick eyebrow	76	1.15
Ear
Low-set ears	255	3.86
Protruding ear	124	1.88
Low-set, posteriorly rotated ears	98	1.49
Macrotia	95	1.44
Cupped ear	71	1.08
Microtia	68	1.03
Posteriorly rotated ears	67	1.02
Nose
Anteverted nares	192	2.91
Depressed nasal bridge	172	2.61
Wide nasal bridge	151	2.29
Short nose	128	1.94
Prominent nasal bridge	109	1.65
Mouth
High palate	229	3.47
Wide mouth	170	2.58
Narrow mouth	141	2.14
Thick lower lip vermilion	139	2.11
Short philtrum	137	2.08
Thin upper lip vermilion	136	2.06
Smooth philtrum	129	1.95
Long philtrum	128	1.94
Thin vermilion border	125	1.89
Cleft palate	107	1.62
Downturned corners of mouth	83	1.26
Tented upper lip vermilion	72	1.09
Widely spaced teeth	71	1.08
Thick upper lip vermilion	68	1.03
Growth
Short stature	385	5.83
Intrauterine growth retardation	209	3.17
Obesity	141	2.14
Proportionate short stature	124	1.88
Failure to thrive	84	1.27
Tall stature	82	1.24
Arm
Clinodactyly of the 5th finger	280	4.24
Tapered finger	230	3.49
Prominent fingertip pads	147	2.23
Long fingers	111	1.68
Single transverse palmar crease	97	1.47
Bilateral single transverse palmar creases	84	1.27
Broad thumb	68	1.03
Leg
Pes planus	196	2.97
2-3 toe syndactyly	159	2.41
Pectus excavatum	117	1.77
Short foot	106	1.61
Sandal gap	85	1.29
Broad hallux	76	1.15
Talipes	74	1.12
Overlapping toe	72	1.09
Breast
Inverted nipples	106	1.61
Wide intermamillary distance	75	1.14
Cardiovascular system
Ventricular septal defect	149	2.26
Atrial septal defect	129	1.95
Respiratory system
Laryngomalacia	71	1.08
Digestive system
Inguinal hernia	101	1.53
Umbilical hernia	77	1.17
Reproductive system
Cryptorchidism	244	3.70
Hypospadias	72	1.09
Spine
Scoliosis	170	2.58
Sacral dimple	68	1.03
Other
Polyhydramnios	87	1.32
Sparse scalp hair	85	1.29
