# Supplementary material for: Developing a cluster-based approach for deciphering complexity in individuals with neurodevelopmental differences
Source: Front Pediatr. 2023 Sep 18;11:1171920. doi: 10.3389/fped.2023.1171920 (PMC10543689; doi:10.3389/fped.2023.1171920)
Supplement: Supplementary file 4 [file Table4.xlsx]

## Sheet: MCL clusters for cluster 4
#clustering method	cluster number	cluster color	gene count	protein name	protein description
MCL	1	Red	106	ACTB	Actin, cytoplasmic 1; Actins are highly conserved proteins that are involved in various types of cell motility and are ubiquitously expressed in all eukaryotic cells
MCL	1	Red	106	ADCK3	Atypical kinase COQ8A, mitochondrial; Atypical kinase involved in the biosynthesis of coenzyme Q, also named ubiquinone, an essential lipid-soluble electron transporter for aerobic cellular respiration. Its substrate specificity is unclear: does not show any protein kinase activity. Probably acts as a small molecule kinase, possibly a lipid kinase that phosphorylates a prenyl lipid in the ubiquin…
MCL	1	Red	106	ALB	Serum albumin; Serum albumin, the main protein of plasma, has a good binding capacity for water, Ca(2+), Na(+), K(+), fatty acids, hormones, bilirubin and drugs. Its main function is the regulation of the colloidal osmotic pressure of blood. Major zinc transporter in plasma, typically binds about 80% of all plasma zinc; Belongs to the ALB/AFP/VDB family
MCL	1	Red	106	ANKRD11	Ankyrin repeat domain-containing protein 11; Chromatin regulator which modulates histone acetylation and gene expression in neural precursor cells (By similarity). May recruit histone deacetylases (HDACs) to the p160 coactivators/nuclear receptor complex to inhibit ligand-dependent transactivation. Has a role in proliferation and development of cortical neural precursors. May also regulate bone h…
MCL	1	Red	106	ANO10	Anoctamin-10; Does not exhibit calcium-activated chloride channel (CaCC) activity. Can inhibit the activity of ANO1; Belongs to the anoctamin family
MCL	1	Red	106	APC	Adenomatous polyposis coli protein; Tumor suppressor. Promotes rapid degradation of CTNNB1 and participates in Wnt signaling as a negative regulator. APC activity is correlated with its phosphorylation state. Activates the GEF activity of SPATA13 and ARHGEF4. Plays a role in hepatocyte growth factor (HGF)-induced cell migration. Required for MMP9 up-regulation via the JNK signaling pathway in col…
MCL	1	Red	106	AR	Androgen receptor; Steroid hormone receptors are ligand-activated transcription factors that regulate eukaryotic gene expression and affect cellular proliferation and differentiation in target tissues. Transcription factor activity is modulated by bound coactivator and corepressor proteins. Transcription activation is down-regulated by NR0B2. Activated, but not phosphorylated, by HIPK3 and ZIPK/D…
MCL	1	Red	106	ASPM	Abnormal spindle-like microcephaly-associated protein; Involved in mitotic spindle regulation and coordination of mitotic processes. The function in regulating microtubule dynamics at spindle poles including spindle orientation, astral microtubule density and poleward microtubule flux seems to depend on the association with the katanin complex formed by KATNA1 and KATNB1. Enhances the microtubule…
MCL	1	Red	106	ASXL1	Additional sex combs like 1, transcriptional regulator; Putative Polycomb group protein ASXL1; Probable Polycomb group (PcG) protein involved in transcriptional regulation mediated by ligand-bound nuclear hormone receptors, such as retinoic acid receptors (RARs) and peroxisome proliferator-activated receptor gamma (PPARG). Acts as coactivator of RARA and RXRA through association with NCOA1. Acts …
MCL	1	Red	106	ATM	Serine-protein kinase ATM; Serine/threonine protein kinase which activates checkpoint signaling upon double strand breaks (DSBs), apoptosis and genotoxic stresses such as ionizing ultraviolet A light (UVA), thereby acting as a DNA damage sensor. Recognizes the substrate consensus sequence [ST]-Q. Phosphorylates 'Ser-139' of histone variant H2AX/H2AFX at double strand breaks (DSBs), thereby regula…
MCL	1	Red	106	ATR	Serine/threonine-protein kinase ATR; Serine/threonine protein kinase which activates checkpoint signaling upon genotoxic stresses such as ionizing radiation (IR), ultraviolet light (UV), or DNA replication stalling, thereby acting as a DNA damage sensor. Recognizes the substrate consensus sequence [ST]-Q. Phosphorylates BRCA1, CHEK1, MCM2, RAD17, RPA2, SMC1 and p53/TP53, which collectively inhibi…
MCL	1	Red	106	ATRX	Transcriptional regulator ATRX; Involved in transcriptional regulation and chromatin remodeling. Facilitates DNA replication in multiple cellular environments and is required for efficient replication of a subset of genomic loci. Binds to DNA tandem repeat sequences in both telomeres and euchromatin and in vitro binds DNA quadruplex structures. May help stabilizing G-rich regions into regular chr…
MCL	1	Red	106	BRCA1	Breast cancer type 1 susceptibility protein; E3 ubiquitin-protein ligase that specifically mediates the formation of 'Lys-6'-linked polyubiquitin chains and plays a central role in DNA repair by facilitating cellular responses to DNA damage. It is unclear whether it also mediates the formation of other types of polyubiquitin chains. The E3 ubiquitin-protein ligase activity is required for its tum…
MCL	1	Red	106	BRCA2	Breast cancer type 2 susceptibility protein; Involved in double-strand break repair and/or homologous recombination. Binds RAD51 and potentiates recombinational DNA repair by promoting assembly of RAD51 onto single-stranded DNA (ssDNA). Acts by targeting RAD51 to ssDNA over double-stranded DNA, enabling RAD51 to displace replication protein-A (RPA) from ssDNA and stabilizing RAD51-ssDNA filaments…
MCL	1	Red	106	BRPF1	Peregrin; Component of the MOZ/MORF complex which has a histone H3 acetyltransferase activity. Preferentially mediates histone H3-K23 acetylation. Positively regulates the transcription of RUNX1 and RUNX2; Bromodomain containing
MCL	1	Red	106	CDK13	Cyclin-dependent kinase 13; Cyclin-dependent kinase which displays CTD kinase activity and is required for RNA splicing. Has CTD kinase activity by hyperphosphorylating the C-terminal heptapeptide repeat domain (CTD) of the largest RNA polymerase II subunit RPB1, thereby acting as a key regulator of transcription elongation. Required for RNA splicing, probably by phosphorylating SRSF1/SF2. Requir…
MCL	1	Red	106	CDK5RAP2	CDK5 regulatory subunit-associated protein 2; Potential regulator of CDK5 activity via its interaction with CDK5R1. Negative regulator of centriole disengagement (licensing) which maintains centriole engagement and cohesion. Involved in regulation of mitotic spindle orientation (By similarity). Plays a role in the spindle checkpoint activation by acting as a transcriptional regulator of both BUBR…
MCL	1	Red	106	CDT1	DNA replication factor Cdt1; Required for both DNA replication and mitosis. DNA replication licensing factor, required for pre-replication complex assembly. Cooperates with CDC6 and the origin recognition complex (ORC) during G1 phase of the cell cycle to promote the loading of the mini-chromosome maintenance (MCM) complex onto DNA to generate pre-replication complexes (pre- RC). Required also fo…
MCL	1	Red	106	CENPJ	Centromere protein J; Plays an important role in cell division and centrosome function by participating in centriole duplication. Inhibits microtubule nucleation from the centrosome. Involved in the regulation of slow processive growth of centriolar microtubules. Acts as microtubule plus-end tracking protein that stabilizes centriolar microtubules and inhibits microtubule polymerization and exten…
MCL	1	Red	106	CHD2	Chromodomain-helicase-DNA-binding protein 2; DNA-binding helicase that specifically binds to the promoter of target genes, leading to chromatin remodeling, possibly by promoting deposition of histone H3.3. Involved in myogenesis via interaction with MYOD1: binds to myogenic gene regulatory sequences and mediates incorporation of histone H3.3 prior to the onset of myogenic gene expression, promoti…
MCL	1	Red	106	CREBBP	CREB-binding protein; Acetylates histones, giving a specific tag for transcriptional activation. Also acetylates non-histone proteins, like NCOA3 and FOXO1. Binds specifically to phosphorylated CREB and enhances its transcriptional activity toward cAMP-responsive genes. Acts as a coactivator of ALX1. Acts as a circadian transcriptional coactivator which enhances the activity of the circadian tran…
MCL	1	Red	106	CSNK2A1	Casein kinase II subunit alpha; Catalytic subunit of a constitutively active serine/threonine-protein kinase complex that phosphorylates a large number of substrates containing acidic residues C-terminal to the phosphorylated serine or threonine. Regulates numerous cellular processes, such as cell cycle progression, apoptosis and transcription, as well as viral infection. May act as a regulatory …
MCL	1	Red	106	DDX3X	ATP-dependent RNA helicase DDX3X; Multifunctional ATP-dependent RNA helicase. The ATPase activity can be stimulated by various ribo- and deoxynucleic acids indicative for a relaxed substrate specificity. In vitro can unwind partially double-stranded DNA with a preference for 5'- single-stranded DNA overhangs. Is involved in several steps of gene expression, such as transcription, mRNA maturation,…
MCL	1	Red	106	DKC1	H/ACA ribonucleoprotein complex subunit 4; Isoform 1: Required for ribosome biogenesis and telomere maintenance. Probable catalytic subunit of H/ACA small nucleolar ribonucleoprotein (H/ACA snoRNP) complex, which catalyzes pseudouridylation of rRNA. This involves the isomerization of uridine such that the ribose is subsequently attached to C5, instead of the normal N1. Each rRNA can contain up to…
MCL	1	Red	106	DNAJC6	Dnaj heat shock protein family (hsp40) member c6; Putative tyrosine-protein phosphatase auxilin; Recruits HSPA8/HSC70 to clathrin-coated vesicles and promotes uncoating of clathrin-coated vesicles. Plays a role in clathrin-mediated endocytosis in neurons (By similarity); C2 tensin-type domain containing
MCL	1	Red	106	DNM1L	Dynamin-1-like protein; Functions in mitochondrial and peroxisomal division. Mediates membrane fission through oligomerization into membrane- associated tubular structures that wrap around the scission site to constrict and sever the mitochondrial membrane through a GTP hydrolysis-dependent mechanism. Through its function in mitochondrial division, ensures the survival of at least some types of p…
MCL	1	Red	106	EHMT1	[histone h3]-lysine9 n-trimethyltransferase ehmt; Histone-lysine N-methyltransferase EHMT1; Histone methyltransferase that specifically mono- and dimethylates 'Lys-9' of histone H3 (H3K9me1 and H3K9me2, respectively) in euchromatin. H3K9me represents a specific tag for epigenetic transcriptional repression by recruiting HP1 proteins to methylated histones. Also weakly methylates 'Lys-27' of histo…
MCL	1	Red	106	EIF3F	Eukaryotic translation initiation factor 3 subunit F; Component of the eukaryotic translation initiation factor 3 (eIF-3) complex, which is required for several steps in the initiation of protein synthesis. The eIF-3 complex associates with the 40S ribosome and facilitates the recruitment of eIF-1, eIF-1A, eIF-2:GTP:methionyl-tRNAi and eIF-5 to form the 43S pre- initiation complex (43S PIC). The …
MCL	1	Red	106	EP300	Histone acetyltransferase p300; Functions as histone acetyltransferase and regulates transcription via chromatin remodeling. Acetylates all four core histones in nucleosomes. Histone acetylation gives an epigenetic tag for transcriptional activation. Mediates cAMP-gene regulation by binding specifically to phosphorylated CREB protein. Mediates acetylation of histone H3 at 'Lys-122' (H3K122ac), a …
MCL	1	Red	106	ERCC6	DNA excision repair protein ERCC-6; Essential factor involved in transcription-coupled nucleotide excision repair which allows RNA polymerase II-blocking lesions to be rapidly removed from the transcribed strand of active genes. Upon DNA-binding, it locally modifies DNA conformation by wrapping the DNA around itself, thereby modifying the interface between stalled RNA polymerase II and DNA. It is…
MCL	1	Red	106	FANCA	Fanconi anemia group A protein; DNA repair protein that may operate in a postreplication repair or a cell cycle checkpoint function. May be involved in interstrand DNA cross-link repair and in the maintenance of normal chromosome stability; Fanconi anemia complementation groups
MCL	1	Red	106	FANCC	Fanconi anemia group C protein; DNA repair protein that may operate in a postreplication repair or a cell cycle checkpoint function. May be implicated in interstrand DNA cross-link repair and in the maintenance of normal chromosome stability. Upon IFNG induction, may facilitate STAT1 activation by recruiting STAT1 to IFNGR1; Fanconi anemia complementation groups
MCL	1	Red	106	FANCG	Fanconi anemia group G protein; DNA repair protein that may operate in a postreplication repair or a cell cycle checkpoint function. May be implicated in interstrand DNA cross-link repair and in the maintenance of normal chromosome stability. Candidate tumor suppressor gene; Fanconi anemia complementation groups
MCL	1	Red	106	FANCI	Fanconi anemia group I protein; Plays an essential role in the repair of DNA double- strand breaks by homologous recombination and in the repair of interstrand DNA cross-links (ICLs) by promoting FANCD2 monoubiquitination by FANCL and participating in recruitment to DNA repair sites. Required for maintenance of chromosomal stability. Specifically binds branched DNA: binds both single- stranded DN…
MCL	1	Red	106	FANCL	E3 ubiquitin-protein ligase FANCL; Ubiquitin ligase protein that mediates monoubiquitination of FANCD2 in the presence of UBE2T, a key step in the DNA damage pathway. Also mediates monoubiquitination of FANCI. May stimulate the ubiquitin release from UBE2W. May be required for proper primordial germ cell proliferation in the embryonic stage, whereas it is probably not needed for spermatogonial pr…
MCL	1	Red	106	FANCM	Fanconi anemia group M protein; DNA-dependent ATPase component of the Fanconi anemia (FA) core complex. Required for the normal activation of the FA pathway, leading to monoubiquitination of the FANCI-FANCD2 complex in response to DNA damage, cellular resistance to DNA cross-linking drugs, and prevention of chromosomal breakage. In complex with CENPS and CENPX, binds double-stranded DNA (dsDNA), …
MCL	1	Red	106	FRAS1	Fraser extracellular matrix complex subunit 1
MCL	1	Red	106	GATA4	Transcription factor GATA-4; Transcriptional activator that binds to the consensus sequence 5'-AGATAG-3' and plays a key role in cardiac development and function. In cooperation with TBX5, it binds to cardiac super-enhancers and promotes cardiomyocyte gene expression, while it downregulates endocardial and endothelial gene expression. Involved in bone morphogenetic protein (BMP)-mediated inductio…
MCL	1	Red	106	GDNF	Glial cell line-derived neurotrophic factor; Neurotrophic factor that enhances survival and morphological differentiation of dopaminergic neurons and increases their high-affinity dopamine uptake; Belongs to the TGF-beta family. GDNF subfamily
MCL	1	Red	106	GFAP	Glial fibrillary acidic protein; GFAP, a class-III intermediate filament, is a cell- specific marker that, during the development of the central nervous system, distinguishes astrocytes from other glial cells
MCL	1	Red	106	GHR	Growth hormone receptor; Receptor for pituitary gland growth hormone involved in regulating postnatal body growth. On ligand binding, couples to the JAK2/STAT5 pathway (By similarity); Belongs to the type I cytokine receptor family. Type 1 subfamily
MCL	1	Red	106	GRIP1	Glutamate receptor-interacting protein 1; May play a role as a localized scaffold for the assembly of a multiprotein signaling complex and as mediator of the trafficking of its binding partners at specific subcellular location in neurons. Through complex formation with NSG1, GRIA2 and STX12 controls the intracellular fate of AMPAR and the endosomal sorting of the GRIA2 subunit toward recycling an…
MCL	1	Red	106	HDAC8	Histone deacetylase 8; Responsible for the deacetylation of lysine residues on the N-terminal part of the core histones (H2A, H2B, H3 and H4). Histone deacetylation gives a tag for epigenetic repression and plays an important role in transcriptional regulation, cell cycle progression and developmental events. Histone deacetylases act via the formation of large multiprotein complexes. Also involve…
MCL	1	Red	106	HERC2	E3 ubiquitin-protein ligase HERC2; E3 ubiquitin-protein ligase that regulates ubiquitin- dependent retention of repair proteins on damaged chromosomes. Recruited to sites of DNA damage in response to ionizing radiation (IR) and facilitates the assembly of UBE2N and RNF8 promoting DNA damage-induced formation of 'Lys-63'-linked ubiquitin chains. Acts as a mediator of binding specificity between UB…
MCL	1	Red	106	HNRNPU	Heterogeneous nuclear ribonucleoprotein U; DNA- and RNA-binding protein involved in several cellular processes such as nuclear chromatin organization, telomere-length regulation, transcription, mRNA alternative splicing and stability, Xist-mediated transcriptional silencing and mitotic cell progression. Plays a role in the regulation of interphase large-scale gene-rich chromatin organization thro…
MCL	1	Red	106	HTRA2	Serine protease HTRA2, mitochondrial; Serine protease that shows proteolytic activity against a non-specific substrate beta-casein. Promotes or induces cell death either by direct binding to and inhibition of BIRC proteins (also called inhibitor of apoptosis proteins, IAPs), leading to an increase in caspase activity, or by a BIRC inhibition-independent, caspase-independent and serine protease ac…
MCL	1	Red	106	KANSL1	KAT8 regulatory NSL complex subunit 1; As part of the NSL complex it is involved in acetylation of nucleosomal histone H4 on several lysine residues and therefore may be involved in the regulation of transcription
MCL	1	Red	106	KAT6A	Histone acetyltransferase KAT6A; Histone acetyltransferase that acetylates lysine residues in histone H3 and histone H4 (in vitro). Component of the MOZ/MORF complex which has a histone H3 acetyltransferase activity. May act as a transcriptional coactivator for RUNX1 and RUNX2. Acetylates p53/TP53 at 'Lys-120' and 'Lys-382' and controls its transcriptional activity via association with PML; MYST …
MCL	1	Red	106	KIT	Mast/stem cell growth factor receptor Kit; Tyrosine-protein kinase that acts as cell-surface receptor for the cytokine KITLG/SCF and plays an essential role in the regulation of cell survival and proliferation, hematopoiesis, stem cell maintenance, gametogenesis, mast cell development, migration and function, and in melanogenesis. In response to KITLG/SCF binding, KIT can activate several signali…
MCL	1	Red	106	KMT2A	[histone h3]-lysine4 n-trimethyltransferase mll1; Histone-lysine N-methyltransferase 2A; Histone methyltransferase that plays an essential role in early development and hematopoiesis. Catalytic subunit of the MLL1/MLL complex, a multiprotein complex that mediates both methylation of 'Lys-4' of histone H3 (H3K4me) complex and acetylation of 'Lys-16' of histone H4 (H4K16ac). In the MLL1/MLL complex…
MCL	1	Red	106	KMT2D	[histone h3]-lysine4 n-trimethyltransferase mll2; Histone-lysine N-methyltransferase 2D; Histone methyltransferase. Methylates 'Lys-4' of histone H3 (H3K4me). H3K4me represents a specific tag for epigenetic transcriptional activation. Acts as a coactivator for estrogen receptor by being recruited by ESR1, thereby activating transcription; Belongs to the class V-like SAM-binding methyltransferase …
MCL	1	Red	106	LRP5	Low-density lipoprotein receptor-related protein 5; Component of the Wnt-Fzd-LRP5-LRP6 complex that triggers beta-catenin signaling through inducing aggregation of receptor- ligand complexes into ribosome-sized signalsomes. Cell-surface coreceptor of Wnt/beta-catenin signaling, which plays a pivotal role in bone formation. Plays a role in norrin (NDP) signal transduction. The Wnt-induced Fzd/LRP6…
MCL	1	Red	106	MCPH1	Microcephalin 1; Microcephalin; Implicated in chromosome condensation and DNA damage induced cellular responses. May play a role in neurogenesis and regulation of the size of the cerebral cortex
MCL	1	Red	106	MFN2	Mitofusin-2; Mitochondrial outer membrane GTPase that mediates mitochondrial clustering and fusion. Mitochondria are highly dynamic organelles, and their morphology is determined by the equilibrium between mitochondrial fusion and fission events. Overexpression induces the formation of mitochondrial networks. Membrane clustering requires GTPase activity and may involve a major rearrangement of th…
MCL	1	Red	106	MICU1	Calcium uptake protein 1, mitochondrial; Key regulator of mitochondrial calcium uniporter (MCU) that senses calcium level via its EF-hand domains. MICU1 and MICU2 form a disulfide-linked heterodimer that stimulates and inhibits MCU activity, depending on the concentration of calcium. MICU1 acts both as an activator or inhibitor of mitochondrial calcium uptake. Acts as a gatekeeper of MCU at low c…
MCL	1	Red	106	MITF	Microphthalmia-associated transcription factor; Transcription factor that regulates the expression of genes with essential roles in cell differentiation, proliferation and survival. Binds to M-boxes (5'-TCATGTG-3') and symmetrical DNA sequences (E-boxes) (5'-CACGTG-3') found in the promoters of target genes, such as BCL2 and tyrosinase (TYR). Plays an important role in melanocyte development by r…
MCL	1	Red	106	MRE11A	Double-strand break repair protein MRE11; Component of the MRN complex, which plays a central role in double-strand break (DSB) repair, DNA recombination, maintenance of telomere integrity and meiosis. The complex possesses single-strand endonuclease activity and double-strand- specific 3'-5' exonuclease activity, which are provided by MRE11. RAD50 may be required to bind DNA ends and hold them i…
MCL	1	Red	106	MTOR	Serine/threonine-protein kinase mTOR; Serine/threonine protein kinase which is a central regulator of cellular metabolism, growth and survival in response to hormones, growth factors, nutrients, energy and stress signals. MTOR directly or indirectly regulates the phosphorylation of at least 800 proteins. Functions as part of 2 structurally and functionally distinct signaling complexes mTORC1 and …
MCL	1	Red	106	MYH7	Myosin heavy chain 6/7; Myosin-7; Myosins are actin-based motor molecules with ATPase activity essential for muscle contraction. Forms regular bipolar thick filaments that, together with actin thin filaments, constitute the fundamental contractile unit of skeletal and cardiac muscle; Belongs to the TRAFAC class myosin-kinesin ATPase superfamily. Myosin family
MCL	1	Red	106	NBN	Nibrin; Component of the MRE11-RAD50-NBN (MRN complex) which plays a critical role in the cellular response to DNA damage and the maintenance of chromosome integrity. The complex is involved in double-strand break (DSB) repair, DNA recombination, maintenance of telomere integrity, cell cycle checkpoint control and meiosis. The complex possesses single-strand endonuclease activity and double-stran…
MCL	1	Red	106	NF1	Neurofibromin; Stimulates the GTPase activity of Ras. NF1 shows greater affinity for Ras GAP, but lower specific activity. May be a regulator of Ras activity; Armadillo-like helical domain containing
MCL	1	Red	106	NKX2-5	Homeobox protein Nkx-2.5; Implicated in commitment to and/or differentiation of the myocardial lineage. Acts as a transcriptional activator of ANF in cooperation with GATA4 (By similarity). Binds to the core DNA motif of NPPA promoter. It is transcriptionally controlled by PBX1 and acts as a transcriptional repressor of CDKN2B (By similarity). It is required for spleen development; NKL subclass h…
MCL	1	Red	106	NOTCH3	Neurogenic locus notch homolog protein 3; Functions as a receptor for membrane-bound ligands Jagged1, Jagged2 and Delta1 to regulate cell-fate determination. Upon ligand activation through the released notch intracellular domain (NICD) it forms a transcriptional activator complex with RBPJ/RBPSUH and activates genes of the enhancer of split locus. Affects the implementation of differentiation, pr…
MCL	1	Red	106	OCA2	OCA2 melanosomal transmembrane protein; P protein; Could be involved in the transport of tyrosine, the precursor to melanin synthesis, within the melanocyte. Regulates the pH of melanosome and the melanosome maturation. One of the components of the mammalian pigmentary system. Seems to regulate the post-translational processing of tyrosinase, which catalyzes the limiting reaction in melanin synth…
MCL	1	Red	106	OPA1	Dynamin-like 120 kDa protein, mitochondrial; Dynamin-related GTPase that is essential for normal mitochondrial morphology by regulating the equilibrium between mitochondrial fusion and mitochondrial fission. Coexpression of isoform 1 with shorter alternative products is required for optimal activity in promoting mitochondrial fusion. Binds lipid membranes enriched in negatively charged phospholip…
MCL	1	Red	106	PARK2	E3 ubiquitin-protein ligase parkin; Functions within a multiprotein E3 ubiquitin ligase complex, catalyzing the covalent attachment of ubiquitin moieties onto substrate proteins, such as BCL2, SYT11, CCNE1, GPR37, RHOT1/MIRO1, MFN1, MFN2, STUB1, SNCAIP, SEPT5, TOMM20, USP30, ZNF746 and AIMP2. Mediates monoubiquitination as well as 'Lys-6', 'Lys-11', 'Lys-48'-linked and 'Lys-63'-linked polyubiquit…
MCL	1	Red	106	PAX6	Paired box protein Pax-6; Transcription factor with important functions in the development of the eye, nose, central nervous system and pancreas. Required for the differentiation of pancreatic islet alpha cells (By similarity). Competes with PAX4 in binding to a common element in the glucagon, insulin and somatostatin promoters. Regulates specification of the ventral neuron subtypes by establishi…
MCL	1	Red	106	PDX1	Pancreas/duodenum homeobox protein 1; Activates insulin, somatostatin, glucokinase, islet amyloid polypeptide and glucose transporter type 2 gene transcription. Particularly involved in glucose-dependent regulation of insulin gene transcription. As part of a PDX1:PBX1b:MEIS2b complex in pancreatic acinar cells is involved in the transcriptional activation of the ELA1 enhancer; the complex binds t…
MCL	1	Red	106	PHOX2B	Paired mesoderm homeobox protein 2B; Involved in the development of several major noradrenergic neuron populations, including the locus coeruleus. Transcription factor which could determine a neurotransmitter phenotype in vertebrates. Enhances second-messenger-mediated activation of the dopamine beta-hydrolase and c-fos promoters, and of several enhancers including cAMP-response element and serum…
MCL	1	Red	106	PPP2R1A	Serine/threonine-protein phosphatase 2A 65 kDa regulatory subunit A alpha isoform; The PR65 subunit of protein phosphatase 2A serves as a scaffolding molecule to coordinate the assembly of the catalytic subunit and a variable regulatory B subunit. Upon interaction with GNA12 promotes dephosphorylation of microtubule associated protein TAU/MAPT. Required for proper chromosome segregation and for c…
MCL	1	Red	106	PRMT7	Protein arginine N-methyltransferase 7; Arginine methyltransferase that can both catalyze the formation of omega-N monomethylarginine (MMA) and symmetrical dimethylarginine (sDMA), with a preference for the formation of MMA. Specifically mediates the symmetrical dimethylation of arginine residues in the small nuclear ribonucleoproteins Sm D1 (SNRPD1) and Sm D3 (SNRPD3); such methylation being req…
MCL	1	Red	106	PROC	Vitamin K-dependent protein C; Protein C is a vitamin K-dependent serine protease that regulates blood coagulation by inactivating factors Va and VIIIa in the presence of calcium ions and phospholipids. Exerts a protective effect on the endothelial cell barrier function; Belongs to the peptidase S1 family
MCL	1	Red	106	PROKR2	Prokineticin receptor 2; Receptor for prokineticin 2. Exclusively coupled to the G(q) subclass of heteromeric G proteins. Activation leads to mobilization of calcium, stimulation of phosphoinositide turnover and activation of p44/p42 mitogen-activated protein kinase
MCL	1	Red	106	PROP1	Homeobox protein prophet of Pit-1; Possibly involved in the ontogenesis of pituitary gonadotropes, as well as somatotropes, lactotropes and caudomedial thyrotropes; PRD class homeoboxes and pseudogenes
MCL	1	Red	106	PSEN2	Presenilin-2; Probable catalytic subunit of the gamma-secretase complex, an endoprotease complex that catalyzes the intramembrane cleavage of integral membrane proteins such as Notch receptors and APP (amyloid-beta precursor protein). Requires the other members of the gamma-secretase complex to have a protease activity. May play a role in intracellular signaling and gene expression or in linking …
MCL	1	Red	106	PTEN	Phosphatase and tensin homolog; Tumor suppressor. Acts as a dual-specificity protein phosphatase, dephosphorylating tyrosine-, serine- and threonine- phosphorylated proteins. Also acts as a lipid phosphatase, removing the phosphate in the D3 position of the inositol ring from phosphatidylinositol 3,4,5-trisphosphate, phosphatidylinositol 3,4-diphosphate, phosphatidylinositol 3- phosphate and inos…
MCL	1	Red	106	PTPN11	Tyrosine-protein phosphatase non-receptor type 11; Acts downstream of various receptor and cytoplasmic protein tyrosine kinases to participate in the signal transduction from the cell surface to the nucleus. Positively regulates MAPK signal transduction pathway. Dephosphorylates GAB1, ARHGAP35 and EGFR. Dephosphorylates ROCK2 at 'Tyr-722' resulting in stimulatation of its RhoA binding activity. D…
MCL	1	Red	106	RAD50	DNA repair protein RAD50; Component of the MRN complex, which plays a central role in double-strand break (DSB) repair, DNA recombination, maintenance of telomere integrity and meiosis. The complex possesses single-strand endonuclease activity and double-strand- specific 3'-5' exonuclease activity, which are provided by MRE11. RAD50 may be required to bind DNA ends and hold them in close proximit…
MCL	1	Red	106	RAD51C	DNA repair protein RAD51 homolog 3; Essential for the homologous recombination (HR) pathway of DNA repair. Involved in the homologous recombination repair (HRR) pathway of double-stranded DNA breaks arising during DNA replication or induced by DNA-damaging agents. Part of the RAD21 paralog protein complexes BCDX2 and CX3 which act at different stages of the BRCA1-BRCA2-dependent HR pathway. Upon …
MCL	1	Red	106	RECQL4	ATP-dependent DNA helicase Q4; DNA-dependent ATPase. May modulate chromosome segregation; Belongs to the helicase family. RecQ subfamily
MCL	1	Red	106	RET	Proto-oncogene tyrosine-protein kinase receptor Ret; Receptor tyrosine-protein kinase involved in numerous cellular mechanisms including cell proliferation, neuronal navigation, cell migration, and cell differentiation upon binding with glial cell derived neurotrophic factor family ligands. Phosphorylates PTK2/FAK1. Regulates both cell death/survival balance and positional information. Required f…
MCL	1	Red	106	RPS19	40S ribosomal protein S19; Required for pre-rRNA processing and maturation of 40S ribosomal subunits; Belongs to the eukaryotic ribosomal protein eS19 family
MCL	1	Red	106	RTEL1	Regulator of telomere elongation helicase 1; ATP-dependent DNA helicase implicated in telomere-length regulation, DNA repair and the maintenance of genomic stability. Acts as an anti-recombinase to counteract toxic recombination and limit crossover during meiosis. Regulates meiotic recombination and crossover homeostasis by physically dissociating strand invasion events and thereby promotes noncr…
MCL	1	Red	106	SACS	Sacsin; Co-chaperone which acts as a regulator of the Hsp70 chaperone machinery and may be involved in the processing of other ataxia-linked proteins; DNAJ heat shock proteins
MCL	1	Red	106	SETD1A	Histone-lysine N-methyltransferase SETD1A; Histone methyltransferase that specifically methylates 'Lys-4' of histone H3, when part of the SET1 histone methyltransferase (HMT) complex, but not if the neighboring 'Lys- 9' residue is already methylated. H3 'Lys-4' methylation represents a specific tag for epigenetic transcriptional activation. The non-overlapping localization with SETD1B suggests th…
MCL	1	Red	106	SHH	Sonic hedgehog protein; Sonic hedgehog protein: The C-terminal part of the sonic hedgehog protein precursor displays an autoproteolysis and a cholesterol transferase activity (By similarity). Both activities result in the cleavage of the full-length protein into two parts (ShhN and ShhC) followed by the covalent attachment of a cholesterol moiety to the C-terminal of the newly generated ShhN (By …
MCL	1	Red	106	SIX3	Homeobox protein SIX3; Transcriptional regulator which can act as both a transcriptional repressor and activator by binding a ATTA homeodomain core recognition sequence on these target genes. During forebrain development represses WNT1 expression allowing zona limitans intrathalamica formation and thereby ensuring proper anterio-posterior patterning of the diencephalon and formation of the rostra…
MCL	1	Red	106	SLC18A2	Mfs transporter, dha1 family, solute carrier family 18 (vesicular amine transporter), member 1/2; Synaptic vesicular amine transporter; Involved in the ATP-dependent vesicular transport of biogenic amine neurotransmitters. Pumps cytosolic monoamines including dopamine, norepinephrine, serotonin, and histamine into synaptic vesicles. Requisite for vesicular amine storage prior to secretion via exo…
MCL	1	Red	106	SLC6A9	Solute carrier family 6 (neurotransmitter transporter, glycine) member 5/9; Sodium- and chloride-dependent glycine transporter 1; Terminates the action of glycine by its high affinity sodium-dependent reuptake into presynaptic terminals. May play a role in regulation of glycine levels in NMDA receptor-mediated neurotransmission; Solute carriers
MCL	1	Red	106	SMAD4	Mothers against decapentaplegic homolog 4; In muscle physiology, plays a central role in the balance between atrophy and hypertrophy. When recruited by MSTN, promotes atrophy response via phosphorylated SMAD2/4. MSTN decrease causes SMAD4 release and subsequent recruitment by the BMP pathway to promote hypertrophy via phosphorylated SMAD1/5/8. Acts synergistically with SMAD1 and YY1 in bone morph…
MCL	1	Red	106	SMC1A	Structural maintenance of chromosomes protein 1A; Involved in chromosome cohesion during cell cycle and in DNA repair. Central component of cohesin complex. The cohesin complex is required for the cohesion of sister chromatids after DNA replication. The cohesin complex apparently forms a large proteinaceous ring within which sister chromatids can be trapped. At anaphase, the complex is cleaved an…
MCL	1	Red	106	SOD1	Superoxide dismutase, cu-zn family; Superoxide dismutase [Cu-Zn]; Destroys radicals which are normally produced within the cells and which are toxic to biological systems
MCL	1	Red	106	SOX3	Transcription factor SOX-3; Transcription factor required during the formation of the hypothalamo-pituitary axis. May function as a switch in neuronal development. Keeps neural cells undifferentiated by counteracting the activity of proneural proteins and suppresses neuronal differentiation. Required also within the pharyngeal epithelia for craniofacial morphogenesis. Controls a genetic switch in…
MCL	1	Red	106	STIL	SCL-interrupting locus protein; Immediate-early gene. Plays an important role in embryonic development as well as in cellular growth and proliferation; its long-term silencing affects cell survival and cell cycle distribution as well as decreases CDK1 activity correlated with reduced phosphorylation of CDK1. Plays a role as a positive regulator of the sonic hedgehog pathway, acting downstream of …
MCL	1	Red	106	SYNE1	Nesprin-1; Multi-isomeric modular protein which forms a linking network between organelles and the actin cytoskeleton to maintain the subcellular spatial organization. As a component of the LINC (LInker of Nucleoskeleton and Cytoskeleton) complex involved in the connection between the nuclear lamina and the cytoskeleton. The nucleocytoplasmic interactions established by the LINC complex play an i…
MCL	1	Red	106	TCF4	Transcription factor 4; Transcription factor that binds to the immunoglobulin enchancer Mu-E5/KE5-motif. Involved in the initiation of neuronal differentiation. Activates transcription by binding to the E box (5'-CANNTG-3'). Binds to the E-box present in the somatostatin receptor 2 initiator element (SSTR2-INR) to activate transcription (By similarity). Preferentially binds to either 5'-ACANNTGT-…
MCL	1	Red	106	TDP2	Tyrosyl-DNA phosphodiesterase 2; DNA repair enzyme that can remove a variety of covalent adducts from DNA through hydrolysis of a 5'-phosphodiester bond, giving rise to DNA with a free 5' phosphate. Catalyzes the hydrolysis of dead-end complexes between DNA and the topoisomerase 2 (TOP2) active site tyrosine residue. The 5'-tyrosyl DNA phosphodiesterase activity can enable the repair of TOP2-indu…
MCL	1	Red	106	TERT	Telomerase reverse transcriptase; Telomerase is a ribonucleoprotein enzyme essential for the replication of chromosome termini in most eukaryotes. Active in progenitor and cancer cells. Inactive, or very low activity, in normal somatic cells. Catalytic component of the teleromerase holoenzyme complex whose main activity is the elongation of telomeres by acting as a reverse transcriptase that adds…
MCL	1	Red	106	TGFBR2	Transforming growth factor beta receptor 2; TGF-beta receptor type-2; Transmembrane serine/threonine kinase forming with the TGF-beta type I serine/threonine kinase receptor, TGFBR1, the non- promiscuous receptor for the TGF-beta cytokines TGFB1, TGFB2 and TGFB3. Transduces the TGFB1, TGFB2 and TGFB3 signal from the cell surface to the cytoplasm and is thus regulating a plethora of physiological …
MCL	1	Red	106	TINF2	TERF1-interacting nuclear factor 2; Component of the shelterin complex (telosome) that is involved in the regulation of telomere length and protection. Shelterin associates with arrays of double-stranded TTAGGG repeats added by telomerase and protects chromosome ends; without its protective activity, telomeres are no longer hidden from the DNA damage surveillance and chromosome ends are inappropr…
MCL	1	Red	106	TUBB3	Tubulin beta-3 chain; Tubulin is the major constituent of microtubules. It binds two moles of GTP, one at an exchangeable site on the beta chain and one at a non-exchangeable site on the alpha chain. TUBB3 plays a critical role in proper axon guidance and mantainance; Belongs to the tubulin family
MCL	1	Red	106	TUBGCP6	Tubulin gamma complex associated protein 6; Gamma-tubulin complex component 6; Gamma-tubulin complex is necessary for microtubule nucleation at the centrosome
MCL	1	Red	106	VCP	Transitional endoplasmic reticulum ATPase; Necessary for the fragmentation of Golgi stacks during mitosis and for their reassembly after mitosis. Involved in the formation of the transitional endoplasmic reticulum (tER). The transfer of membranes from the endoplasmic reticulum to the Golgi apparatus occurs via 50-70 nm transition vesicles which derive from part-rough, part-smooth transitional ele…
MCL	1	Red	106	WT1	Wilms tumor protein; Transcription factor that plays an important role in cellular development and cell survival. Recognizes and binds to the DNA sequence 5'-GCG(T/G)GGGCG-3'. Regulates the expression of numerous target genes, including EPO. Plays an essential role for development of the urogenital system. It has a tumor suppressor as well as an oncogenic role in tumor formation. Function may be …
MCL	1	Red	106	WWOX	WW domain-containing oxidoreductase; Putative oxidoreductase. Acts as a tumor suppressor and plays a role in apoptosis. Required for normal bone development (By similarity). May function synergistically with p53/TP53 to control genotoxic stress-induced cell death. Plays a role in TGFB1 signaling and TGFB1-mediated cell death. May also play a role in tumor necrosis factor (TNF)-mediated cell death…
MCL	1	Red	106	ZNF335	Zinc finger protein 335; Component or associated component of some histone methyltransferase complexes may regulate transcription through recruitment of those complexes on gene promoters. Enhances ligand- dependent transcriptional activation by nuclear hormone receptors. Plays an important role in neural progenitor cell proliferation and self-renewal through the regulation of specific genes invol…
MCL	2	Salmon	65	ABCA4	Atp-binding cassette, subfamily a (abc1), member 4; Retinal-specific ATP-binding cassette transporter; In the visual cycle, acts as an inward-directed retinoid flipase, retinoid substrates imported by ABCA4 from the extracellular or intradiscal (rod) membrane surfaces to the cytoplasmic membrane surface are all-trans-retinaldehyde (ATR) and N-retinyl-phosphatidyl-ethanolamine (NR-PE). Once transp…
MCL	2	Salmon	65	AHI1	Abelson helper integration site 1; Jouberin; Involved in vesicle trafficking and required for ciliogenesis, formation of primary non-motile cilium, and recruitment of RAB8A to the basal body of primary cilium. Component of the tectonic-like complex, a complex localized at the transition zone of primary cilia and acting as a barrier that prevents diffusion of transmembrane proteins between the cil…
MCL	2	Salmon	65	ALMS1	ALMS1, centrosome and basal body associated protein; Alstrom syndrome protein 1; Involved in PCM1-dependent intracellular transport. Required, directly or indirectly, for the localization of NCAPD2 to the proximal ends of centrioles. Required for proper formation and/or maintenance of primary cilia (PC), microtubule-based structures that protrude from the surface of epithelial cells
MCL	2	Salmon	65	BBS1	Bardet-Biedl syndrome 1 protein; The BBSome complex is thought to function as a coat complex required for sorting of specific membrane proteins to the primary cilia. The BBSome complex is required for ciliogenesis but is dispensable for centriolar satellite function. This ciliogenic function is mediated in part by the Rab8 GDP/GTP exchange factor, which localizes to the basal body and contacts th…
MCL	2	Salmon	65	BBS10	Bardet-Biedl syndrome 10 protein; Probable molecular chaperone. Assists the folding of proteins upon ATP hydrolysis. As part of the BBS/CCT complex may play a role in the assembly of BBSome, a complex involved in ciliogenesis regulating transports vesicles to the cilia. Involved in adipogenic differentiation; Belongs to the TCP-1 chaperonin family
MCL	2	Salmon	65	BBS12	Bardet-Biedl syndrome 12 protein; Probable molecular chaperone. Assists the folding of proteins upon ATP hydrolysis. As part of the BBS/CCT complex may play a role in the assembly of BBSome, a complex involved in ciliogenesis regulating transports vesicles to the cilia. Involved in adipogenic differentiation; Belongs to the TCP-1 chaperonin family. BBS12 subfamily
MCL	2	Salmon	65	BBS5	Bardet-Biedl syndrome 5 protein; The BBSome complex is thought to function as a coat complex required for sorting of specific membrane proteins to the primary cilia. The BBSome complex is required for ciliogenesis but is dispensable for centriolar satellite function. This ciliogenic function is mediated in part by the Rab8 GDP/GTP exchange factor, which localizes to the basal body and contacts th…
MCL	2	Salmon	65	BBS7	Bardet-Biedl syndrome 7 protein; The BBSome complex is thought to function as a coat complex required for sorting of specific membrane proteins to the primary cilia. The BBSome complex is required for ciliogenesis but is dispensable for centriolar satellite function. This ciliogenic function is mediated in part by the Rab8 GDP/GTP exchange factor, which localizes to the basal body and contacts th…
MCL	2	Salmon	65	BEST1	Bestrophin-1; Forms calcium-sensitive chloride channels. Highly permeable to bicarbonate; Bestrophins
MCL	2	Salmon	65	C5orf42	Protein JBTS17; Involved in ciliogenesis. Involved in the establishment of cell polarity required for directional cell migration. Proposed to act in association with the CPLANE (ciliogenesis and planar polarity effectors) complex. Involved in recruitment of peripheral IFT-A proteins to basal bodies (By similarity)
MCL	2	Salmon	65	CDH23	Cadherin related 23; Cadherin-23; Cadherins are calcium-dependent cell adhesion proteins. They preferentially interact with themselves in a homophilic manner in connecting cells. CDH23 is required for establishing and/or maintaining the proper organization of the stereocilia bundle of hair cells in the cochlea and the vestibule during late embryonic/early postnatal development. It is part of the …
MCL	2	Salmon	65	CDHR1	Cadherin-related family member 1; Potential calcium-dependent cell-adhesion protein. May be required for the structural integrity of the outer segment (OS) of photoreceptor cells (By similarity); Cadherin related
MCL	2	Salmon	65	CEP120	Centrosomal protein of 120 kDa; Plays a role in the microtubule-dependent coupling of the nucleus and the centrosome. Involved in the processes that regulate centrosome-mediated interkinetic nuclear migration (INM) of neural progenitors and for proper positioning of neurons during brain development. Also implicated in the migration and selfrenewal of neural progenitors. Required for centriole dup…
MCL	2	Salmon	65	CEP164	Centrosomal protein of 164 kDa; Plays a role in microtubule organization and/or maintenance for the formation of primary cilia (PC), a microtubule-based structure that protrudes from the surface of epithelial cells. Plays a critical role in G2/M checkpoint and nuclear divisions. A key player in the DNA damage-activated ATR/ATM signaling cascade since it is required for the proper phosphorylation …
MCL	2	Salmon	65	CEP290	Centrosomal protein of 290 kDa; Involved in early and late steps in cilia formation. Its association with CCP110 is required for inhibition of primary cilia formation by CCP110. May play a role in early ciliogenesis in the disappearance of centriolar satellites and in the transition of primary ciliar vesicles (PCVs) to capped ciliary vesicles (CCVs). Required for the centrosomal recruitment of RA…
MCL	2	Salmon	65	CEP41	Centrosomal protein of 41 kDa; Required during ciliogenesis for tubulin glutamylation in cilium. Probably acts by participating in the transport of TTLL6, a tubulin polyglutamylase, between the basal body and the cilium; Belongs to the CEP41 family
MCL	2	Salmon	65	CLRN1	Clarin-1; May have a role in the excitatory ribbon synapse junctions between hair cells and cochlear ganglion cells and presumably also in analogous synapses within the retina; Belongs to the clarin family
MCL	2	Salmon	65	CNGA1	cGMP-gated cation channel alpha-1; Visual signal transduction is mediated by a G-protein coupled cascade using cGMP as second messenger. This protein can be activated by cyclic GMP which leads to an opening of the cation channel and thereby causing a depolarization of rod photoreceptors; Belongs to the cyclic nucleotide-gated cation channel (TC 1.A.1.5) family. CNGA1 subfamily
MCL	2	Salmon	65	CNGB1	Cyclic nucleotide-gated cation channel beta-1; Subunit of cyclic nucleotide-gated (CNG) channels, nonselective cation channels, which play important roles in both visual and olfactory signal transduction. When associated with CNGA1, it is involved in the regulation of ion flow into the rod photoreceptor outer segment (ROS), in response to light-induced alteration of the levels of intracellular cG…
MCL	2	Salmon	65	CRB1	Protein crumbs homolog 1; Plays a role in photoreceptor morphogenesis in the retina. May maintain cell polarization and adhesion; Belongs to the Crumbs protein family
MCL	2	Salmon	65	CSPP1	Centrosome and spindle pole-associated protein 1; May play a role in cell-cycle-dependent microtubule organization
MCL	2	Salmon	65	DCHS1	Protocadherin-16; Calcium-dependent cell-adhesion protein. Mediates functions in neuroprogenitor cell proliferation and differentiation. In the heart, has a critical role for proper morphogenesis of the mitral valve, acting in the regulation of cell migration involved in valve formation; Cadherin related
MCL	2	Salmon	65	DOCK7	Dedicator of cytokinesis protein 7; Functions as a guanine nucleotide exchange factor (GEF), which activates Rac1 and Rac3 Rho small GTPases by exchanging bound GDP for free GTP. Does not have a GEF activity for CDC42. Required for STMN1 'Ser-15' phosphorylation during axon formation and consequently for neuronal polarization. Has a role in pigmentation (By similarity). Involved in the regulation…
MCL	2	Salmon	65	DYNC2H1	Cytoplasmic dynein 2 heavy chain 1; May function as a motor for intraflagellar retrograde transport. Functions in cilia biogenesis. May play a role in transport between endoplasmic reticulum and Golgi or organization of the Golgi in cells (By similarity); Dyneins, cytoplasmic
MCL	2	Salmon	65	DYNC2LI1	Cytoplasmic dynein 2 light intermediate chain 1; Required for correct intraflagellar transport (IFT), the bi-directional movement of particles required for the assembly, maintenance and functioning of primary cilia. Involved in the regulation of ciliary length; Dyneins, cytoplasmic
MCL	2	Salmon	65	EVC2	Ellis van creveld syndrome protein 2; Limbin; Component of the EvC complex that positively regulates ciliary Hedgehog (Hh) signaling. Plays a critical role in bone formation and skeletal development. May be involved in early embryonic morphogenesis
MCL	2	Salmon	65	EYS	Protein eyes shut homolog; Required to maintain the integrity of photoreceptor cells; Belongs to the EYS family
MCL	2	Salmon	65	FAM161A	Family with sequence similarity 161 member a; Protein FAM161A; Involved in ciliogenesis
MCL	2	Salmon	65	GDF6	Growth/differentiation factor 6; Growth factor that controls proliferation and cellular differentiation in the retina and bone formation. Plays a key role in regulating apoptosis during retinal development. Establishes dorsal-ventral positional information in the retina and controls the formation of the retinotectal map. Required for normal formation of bones and joints in the limbs, skull, digit…
MCL	2	Salmon	65	GJB2	Gap junction beta-2 protein; One gap junction consists of a cluster of closely packed pairs of transmembrane channels, the connexons, through which materials of low MW diffuse from one cell to a neighboring cell; Deafness associated genes
MCL	2	Salmon	65	GJB4	Gap junction beta-4 protein; One gap junction consists of a cluster of closely packed pairs of transmembrane channels, the connexons, through which materials of low MW diffuse from one cell to a neighboring cell; Belongs to the connexin family. Beta-type (group I) subfamily
MCL	2	Salmon	65	GLI3	Transcriptional activator GLI3; Has a dual function as a transcriptional activator and a repressor of the sonic hedgehog (Shh) pathway, and plays a role in limb development. The full-length GLI3 form (GLI3FL) after phosphorylation and nuclear translocation, acts as an activator (GLI3A) while GLI3R, its C-terminally truncated form, acts as a repressor. A proper balance between the GLI3 activator a…
MCL	2	Salmon	65	GNB5	Guanine nucleotide-binding protein subunit beta-5; Enhances GTPase-activating protein (GAP) activity of regulator of G protein signaling (RGS) proteins, hence involved in the termination of the signaling initiated by the G protein coupled receptors (GPCRs) by accelerating the GTP hydrolysis on the G-alpha subunits, thereby promoting their inactivation (Probable). Increases RGS9 GTPase-activating …
MCL	2	Salmon	65	GPR161	G-protein coupled receptor 161; Key negative regulator of Shh signaling, which promotes the processing of GLI3 into GLI3R during neural tube development. Recruited by TULP3 and the IFT-A complex to primary cilia and acts as a regulator of the PKA-dependent basal repression machinery in Shh signaling by increasing cAMP levels, leading to promote the PKA-dependent processing of GLI3 into GLI3R and …
MCL	2	Salmon	65	GUCY2D	Retinal guanylyl cyclase 1; Probably plays a specific functional role in the rods and/or cones of photoreceptors. It may be the enzyme involved in the resynthesis of cGMP required for recovery of the dark state after phototransduction; Guanylate cyclase receptors
MCL	2	Salmon	65	IFT74	Intraflagellar transport protein 74 homolog; Component of the intraflagellar transport (IFT) complex B: together with IFT81, forms a tubulin-binding module that specifically mediates transport of tubulin within the cilium. Binds beta-tubulin via its basic region. Required for ciliogenesis; Belongs to the IFT74 family
MCL	2	Salmon	65	IMPG2	Interphotoreceptor matrix proteoglycan 2; Chondroitin sulfate- and hyaluronan-binding proteoglycan involved in the organization of interphotoreceptor matrix; may participate in the maturation and maintenance of the light- sensitive photoreceptor outer segment. Binds heparin
MCL	2	Salmon	65	KIAA0586	Protein TALPID3; Required for ciliogenesis and sonic hedgehog/SHH signaling. Required for the centrosomal recruitment of RAB8A and for the targeting of centriole satellite proteins to centrosomes such as of PCM1. May play a role in early ciliogenesis in the disappearance of centriolar satellites that preceeds ciliary vesicle formation. Involved in regulation of cell intracellular organization. In…
MCL	2	Salmon	65	KIF7	Kinesin-like protein KIF7; Essential for hedgehog signaling regulation: acts as both a negative and positive regulator of sonic hedgehog (Shh) and Indian hedgehog (Ihh) pathways, acting downstream of SMO, through both SUFU-dependent and -independent mechanisms. Involved in the regulation of microtubular dynamics. Required for proper organization of the ciliary tip and control of ciliary localizat…
MCL	2	Salmon	65	LCA5	LCA5, lebercilin; Lebercilin; Might be involved in minus end-directed microtubule transport
MCL	2	Salmon	65	MAK	Serine/threonine-protein kinase MAK; Essential for the regulation of ciliary length and required for the long-term survival of photoreceptors (By similarity). Phosphorylates FZR1 in a cell cycle-dependent manner. Plays a role in the transcriptional coactivation of AR. Could play an important function in spermatogenesis. May play a role in chromosomal stability in prostate cancer cells
MCL	2	Salmon	65	MKKS	McKusick-Kaufman/Bardet-Biedl syndromes putative chaperonin; Probable molecular chaperone. Assists the folding of proteins upon ATP hydrolysis. As part of the BBS/CCT complex plays a role in the assembly of BBSome, a complex involved in ciliogenesis regulating transports vesicles to the cilia. May play a role in protein processing in limb, cardiac and reproductive system development. May play a r…
MCL	2	Salmon	65	MKS1	Meckel syndrome type 1 protein; Component of the tectonic-like complex, a complex localized at the transition zone of primary cilia and acting as a barrier that prevents diffusion of transmembrane proteins between the cilia and plasma membranes. Involved in centrosome migration to the apical cell surface during early ciliogenesis. Required for ciliary structure and function, including a role in r…
MCL	2	Salmon	65	MYO7A	Unconventional myosin-VIIa; Myosins are actin-based motor molecules with ATPase activity. Unconventional myosins serve in intracellular movements. Their highly divergent tails bind to membranous compartments, which are then moved relative to actin filaments. In the retina, plays an important role in the renewal of the outer photoreceptor disks. Plays an important role in the distribution and migr…
MCL	2	Salmon	65	MYO9A	Unconventional myosin-IXa; Myosins are actin-based motor molecules with ATPase activity. Unconventional myosins serve in intracellular movements. Regulates Rho activity in neurons, has a role in the regulation of neuronal morphology and function (By similarity); Belongs to the TRAFAC class myosin-kinesin ATPase superfamily. Myosin family
MCL	2	Salmon	65	NMNAT1	Nicotinamide/nicotinic acid mononucleotide adenylyltransferase 1; Catalyzes the formation of NAD(+) from nicotinamide mononucleotide (NMN) and ATP. Can also use the deamidated form; nicotinic acid mononucleotide (NaMN) as substrate with the same efficiency. Can use triazofurin monophosphate (TrMP) as substrate. Also catalyzes the reverse reaction, i.e. the pyrophosphorolytic cleavage of NAD(+). F…
MCL	2	Salmon	65	NPHP3	Nephrocystin-3; Required for normal ciliary development and function. Inhibits disheveled-1-induced canonical Wnt-signaling activity and may also play a role in the control of non-canonical Wnt signaling which regulates planar cell polarity. Probably acts as a molecular switch between different Wnt signaling pathways. Required for proper convergent extension cell movements
MCL	2	Salmon	65	OFD1	Oral-facial-digital syndrome 1 protein; Component of the centrioles controlling mother and daughter centrioles length. Recruits to the centriole IFT88 and centriole distal appendage-specific proteins including CEP164. Involved in the biogenesis of the cilium, a centriole-associated function. The cilium is a cell surface projection found in many vertebrate cells required to transduce signals impor…
MCL	2	Salmon	65	PCDH15	Protocadherin-15; Calcium-dependent cell-adhesion protein. Essential for maintenance of normal retinal and cochlear function; Cadherin related
MCL	2	Salmon	65	PDE6A	Rod cGMP-specific 3',5'-cyclic phosphodiesterase subunit alpha; This protein participates in processes of transmission and amplification of the visual signal; Belongs to the cyclic nucleotide phosphodiesterase family
MCL	2	Salmon	65	PDE6B	Rod cGMP-specific 3',5'-cyclic phosphodiesterase subunit beta; This protein participates in processes of transmission and amplification of the visual signal. Necessary for the formation of a functional phosphodiesterase holoenzyme; Belongs to the cyclic nucleotide phosphodiesterase family
MCL	2	Salmon	65	PRPH2	Peripherin-2; May function as an adhesion molecule involved in stabilization and compaction of outer segment disks or in the maintenance of the curvature of the rim. It is essential for disk morphogenesis; Belongs to the PRPH2/ROM1 family
MCL	2	Salmon	65	PTCH1	Protein patched homolog 1; Acts as a receptor for sonic hedgehog (SHH), indian hedgehog (IHH) and desert hedgehog (DHH). Associates with the smoothened protein (SMO) to transduce the hedgehog's proteins signal. Seems to have a tumor suppressor function, as inactivation of this protein is probably a necessary, if not sufficient step for tumorigenesis; Belongs to the patched family
MCL	2	Salmon	65	RBP3	Retinol-binding protein 3; IRBP shuttles 11-cis and all trans retinoids between the retinol isomerase in the pigment epithelium and the visual pigments in the photoreceptor cells of the retina
MCL	2	Salmon	65	ROM1	Rod outer segment membrane protein 1; May function as an adhesion molecule involved in stabilization and compaction of outer segment disks or in the maintenance of the curvature of the rim. It is essential for disk morphogenesis; Tetraspanins
MCL	2	Salmon	65	RPE65	Retinoid isomerohydrolase / lutein isomerase; Retinoid isomerohydrolase; Critical isomerohydrolase in the retinoid cycle involved in regeneration of 11-cis-retinal, the chromophore of rod and cone opsins. Catalyzes the cleavage and isomerization of all-trans- retinyl fatty acid esters to 11-cis-retinol which is further oxidized by 11-cis retinol dehydrogenase to 11-cis-retinal for use as visual c…
MCL	2	Salmon	65	TMEM107	Transmembrane protein 107; Plays a role in cilia formation and embryonic patterning. Requires for normal Sonic hedgehog (Shh) signaling in the neural tube and acts in combination with GLI2 and GLI3 to pattern ventral and intermediate neuronal cell types (By similarity). During ciliogenesis regulates the ciliary transition zone localization of some MKS complex proteins
MCL	2	Salmon	65	TMEM231	Transmembrane protein 231; Transmembrane component of the tectonic-like complex, a complex localized at the transition zone of primary cilia and acting as a barrier that prevents diffusion of transmembrane proteins between the cilia and plasma membranes. Required for ciliogenesis and sonic hedgehog/SHH signaling (By similarity)
MCL	2	Salmon	65	TMEM67	Transmembrane protein 67; Meckelin; Required for ciliary structure and function. Part of the tectonic-like complex which is required for tissue-specific ciliogenesis and may regulate ciliary membrane composition (By similarity). Involved in centrosome migration to the apical cell surface during early ciliogenesis. Involved in the regulation of cilia length and appropriate number through the contr…
MCL	2	Salmon	65	TRIM32	E3 ubiquitin-protein ligase TRIM32; Has an E3 ubiquitin ligase activity. Ubiquitinates DTNBP1 (dysbindin) and promotes its degradation. May ubiquitinate BBS2. May play a significant role in mediating the biological activity of the HIV-1 Tat protein in vivo. Binds specifically to the activation domain of HIV-1 Tat and can also interact with the HIV-2 and EIAV Tat proteins in vivo; Belongs to the T…
MCL	2	Salmon	65	TUB	Tubby bipartite transcription factor; Tubby protein homolog; Functions in signal transduction from heterotrimeric G protein-coupled receptors. Binds to membranes containing phosphatidylinositol 4,5-bisphosphate. Can bind DNA (in vitro). May contribute to the regulation of transcription in the nucleus. Could be involved in the hypothalamic regulation of body weight (By similarity). Contribute to s…
MCL	2	Salmon	65	USH1C	Harmonin; Anchoring/scaffolding protein that is a part of the functional network formed by USH1C, USH1G, CDH23 and MYO7A that mediates mechanotransduction in cochlear hair cells. Required for normal development and maintenance of cochlear hair cell bundles (By similarity). As part of the intermicrovillar adhesion complex/IMAC plays a role in brush border differentiation, controlling microvilli or…
MCL	2	Salmon	65	USH2A	Usherin; Involved in hearing and vision; Fibronectin type III domain containing
MCL	2	Salmon	65	WDR19	WD repeat-containing protein 19; Component of the IFT complex A (IFT-A), a complex required for retrograde ciliary transport. Involved in cilia function and/or assembly (By similarity). Associates with the BBSome complex to mediate ciliary transport (By similarity); Intraflagellar transport proteins
MCL	2	Salmon	65	WFS1	Wolframin er transmembrane glycoprotein; Wolframin; Participates in the regulation of cellular Ca(2+) homeostasis, at least partly, by modulating the filling state of the endoplasmic reticulum Ca(2+) store; Deafness associated genes
MCL	3	Fire Brick	41	ABCC8	ATP-binding cassette sub-family C member 8; Subunit of the beta-cell ATP-sensitive potassium channel (KATP). Regulator of ATP-sensitive K(+) channels and insulin release; ATP binding cassette subfamily C
MCL	3	Fire Brick	41	ANK2	Ankyrin-2; In skeletal muscle, required for proper localization of DMD and DCTN4 and for the formation and/or stability of a special subset of microtubules associated with costameres and neuromuscular junctions. Attaches integral membrane proteins to cytoskeletal elements. Also binds to cytoskeletal proteins. Required for coordinate assembly of Na/Ca exchanger, Na/K ATPase and InsP3 receptor at s…
MCL	3	Fire Brick	41	ARX	Homeobox protein ARX; Transcription factor required for normal brain development. May be important for maintenance of specific neuronal subtypes in the cerebral cortex and axonal guidance in the floor plate; Belongs to the paired homeobox family. Bicoid subfamily
MCL	3	Fire Brick	41	CACNA1A	Voltage-dependent P/Q-type calcium channel subunit alpha-1A; Voltage-sensitive calcium channels (VSCC) mediate the entry of calcium ions into excitable cells and are also involved in a variety of calcium-dependent processes, including muscle contraction, hormone or neurotransmitter release, gene expression, cell motility, cell division and cell death. The isoform alpha-1A gives rise to P and/or Q…
MCL	3	Fire Brick	41	CACNA1D	Voltage-dependent L-type calcium channel subunit alpha-1D; Voltage-sensitive calcium channels (VSCC) mediate the entry of calcium ions into excitable cells and are also involved in a variety of calcium-dependent processes, including muscle contraction, hormone or neurotransmitter release, gene expression, cell motility, cell division and cell death. The isoform alpha-1D gives rise to L-type calci…
MCL	3	Fire Brick	41	CDKL5	Cyclin-dependent kinase-like 5; Mediates phosphorylation of MECP2; Cilia and flagella associated
MCL	3	Fire Brick	41	CNTNAP1	Contactin-associated protein 1; Required, with CNTNAP2, for radial and longitudinal organization of myelinated axons. Plays a role in the formation of functional distinct domains critical for saltatory conduction of nerve impulses in myelinated nerve fibers. Demarcates the paranodal region of the axo-glial junction. In association with contactin involved in the signaling between axons and myelina…
MCL	3	Fire Brick	41	CNTNAP2	Contactin-associated protein-like 2; Required, with CNTNAP1, for radial and longitudinal organization of myelinated axons. Plays a role in the formation of functional distinct domains critical for saltatory conduction of nerve impulses in myelinated nerve fibers. Demarcates the juxtaparanodal region of the axo-glial junction; Belongs to the neurexin family
MCL	3	Fire Brick	41	COG8	Conserved oligomeric Golgi complex subunit 8; Required for normal Golgi function; Components of oligomeric golgi complex
MCL	3	Fire Brick	41	DEPDC5	Dep domain containing 5, gator1 subcomplex subunit; GATOR complex protein DEPDC5; As a component of the GATOR1 complex functions as an inhibitor of the amino acid-sensing branch of the TORC1 pathway. The GATOR1 complex strongly increases GTP hydrolysis by RRAGA and RRAGB within RRAGC-containing heterodimers, thereby deactivating RRAGs, releasing mTORC1 from lysosomal surface and inhibiting mTORC1…
MCL	3	Fire Brick	41	DLG4	Disks large homolog 4; Interacts with the cytoplasmic tail of NMDA receptor subunits and shaker-type potassium channels. Required for synaptic plasticity associated with NMDA receptor signaling. Overexpression or depletion of DLG4 changes the ratio of excitatory to inhibitory synapses in hippocampal neurons. May reduce the amplitude of ASIC3 acid-evoked currents by retaining the channel intracell…
MCL	3	Fire Brick	41	DOCK3	Dedicator of cytokinesis protein 3; Potential guanine nucleotide exchange factor (GEF). GEF proteins activate some small GTPases by exchanging bound GDP for free GTP. Its interaction with presenilin proteins as well as its ability to stimulate Tau/MAPT phosphorylation suggest that it may be involved in Alzheimer disease. Ectopic expression in nerve cells decreases the secretion of amyloid-beta AP…
MCL	3	Fire Brick	41	FBXO11	F-box only protein 11; Substrate recognition component of a SCF (SKP1-CUL1-F- box protein) E3 ubiquitin-protein ligase complex which mediates the ubiquitination and subsequent proteasomal degradation of target proteins, such as DTL/CDT2, BCL6 and PRDM1/BLIMP1. The SCF(FBXO11) complex mediates ubiquitination and degradation of BCL6, thereby playing a role in the germinal center B-cells terminal di…
MCL	3	Fire Brick	41	GJA5	Gap junction alpha-5 protein; One gap junction consists of a cluster of closely packed pairs of transmembrane channels, the connexons, through which materials of low MW diffuse from one cell to a neighboring cell
MCL	3	Fire Brick	41	GRIA1	Glutamate ionotropic receptor ampa type subunit 1; Glutamate receptor 1; Ionotropic glutamate receptor. L-glutamate acts as an excitatory neurotransmitter at many synapses in the central nervous system. Binding of the excitatory neurotransmitter L- glutamate induces a conformation change, leading to the opening of the cation channel, and thereby converts the chemical signal to an electrical impul…
MCL	3	Fire Brick	41	GRIN2B	Glutamate receptor ionotropic, NMDA 2B; Component of NMDA receptor complexes that function as heterotetrameric, ligand-gated ion channels with high calcium permeability and voltage-dependent sensitivity to magnesium. Channel activation requires binding of the neurotransmitter glutamate to the epsilon subunit, glycine binding to the zeta subunit, plus membrane depolarization to eliminate channel i…
MCL	3	Fire Brick	41	HCN4	Potassium/sodium hyperpolarization-activated cyclic nucleotide-gated channel 4; Hyperpolarization-activated ion channel with very slow activation and inactivation exhibiting weak selectivity for potassium over sodium ions. Contributes to the native pacemaker currents in heart (If) that regulate the rhythm of heart beat. May contribute to the native pacemaker currents in neurons (Ih). May mediate …
MCL	3	Fire Brick	41	HOMER2	Homer protein homolog 2; Postsynaptic density scaffolding protein. Binds and cross-links cytoplasmic regions of GRM1, GRM5, ITPR1, DNM3, RYR1, RYR2, SHANK1 and SHANK3. By physically linking GRM1 and GRM5 with ER-associated ITPR1 receptors, it aids the coupling of surface receptors to intracellular calcium release. May also couple GRM1 to PI3 kinase through its interaction with AGAP2. Isoforms can…
MCL	3	Fire Brick	41	ITPR1	Inositol 1,4,5-trisphosphate receptor type 1; Intracellular channel that mediates calcium release from the endoplasmic reticulum following stimulation by inositol 1,4,5- trisphosphate. Involved in the regulation of epithelial secretion of electrolytes and fluid through the interaction with AHCYL1 (By similarity). Plays a role in ER stress-induced apoptosis. Cytoplasmic calcium released from the E…
MCL	3	Fire Brick	41	KCND3	Potassium voltage-gated channel subfamily D member 3; Pore-forming (alpha) subunit of voltage-gated rapidly inactivating A-type potassium channels. May contribute to I(To) current in heart and I(Sa) current in neurons. Channel properties are modulated by interactions with other alpha subunits and with regulatory subunits; Belongs to the potassium channel family. D (Shal) (TC 1.A.1.2) subfamily. K…
MCL	3	Fire Brick	41	KCNQ3	Potassium voltage-gated channel subfamily KQT member 3; Associates with KCNQ2 or KCNQ5 to form a potassium channel with essentially identical properties to the channel underlying the native M-current, a slowly activating and deactivating potassium conductance which plays a critical role in determining the subthreshold electrical excitability of neurons as well as the responsiveness to synaptic in…
MCL	3	Fire Brick	41	KCNT1	Potassium channel subfamily T member 1; Outwardly rectifying potassium channel subunit that may coassemble with other Slo-type channel subunits. Activated by high intracellular sodium or chloride levels. Activated upon stimulation of G-protein coupled receptors, such as CHRM1 and GRIA1. May be regulated by calcium in the absence of sodium ions (in vitro) (By similarity); Belongs to the potassium …
MCL	3	Fire Brick	41	KCNT2	Potassium channel subfamily T member 2; Outward rectifying potassium channel. Produces rapidly activating outward rectifier K(+) currents. Activated by high intracellular sodium and chloride levels. Channel activity is inhibited by ATP and by inhalation anesthetics, such as isoflurane (By similarity). Inhibited upon stimulation of G-protein coupled receptors, such as CHRM1 and GRIA1; Belongs to t…
MCL	3	Fire Brick	41	KCTD7	Potassium channel tetramerization domain containing 7; BTB/POZ domain-containing protein KCTD7; May be involved in the control of excitability of cortical neurons
MCL	3	Fire Brick	41	MECP2	Methyl-CpG-binding protein 2; Chromosomal protein that binds to methylated DNA. It can bind specifically to a single methyl-CpG pair. It is not influenced by sequences flanking the methyl-CpGs. Mediates transcriptional repression through interaction with histone deacetylase and the corepressor SIN3A. Binds both 5-methylcytosine (5mC) and 5-hydroxymethylcytosine (5hmC)-containing DNA, with a prefe…
MCL	3	Fire Brick	41	NRXN3	Neurexin-3; Neuronal cell surface protein that may be involved in cell recognition and cell adhesion. May mediate intracellular signaling; Neurexins
MCL	3	Fire Brick	41	OXTR	Oxytocin receptor; Receptor for oxytocin. The activity of this receptor is mediated by G proteins which activate a phosphatidylinositol- calcium second messenger system; Arginine vasopressin and oxytocin receptors
MCL	3	Fire Brick	41	PCDH19	Protocadherin-19; Potential calcium-dependent cell-adhesion protein; Non-clustered protocadherins
MCL	3	Fire Brick	41	PNKP	Bifunctional polynucleotide phosphatase/kinase; Plays a key role in the repair of DNA damage, functioning as part of both the non-homologous end-joining (NHEJ) and base excision repair (BER) pathways. Through its two catalytic activities, PNK ensures that DNA termini are compatible with extension and ligation by either removing 3'-phosphates from, or by phosphorylating 5'-hydroxyl groups on, the …
MCL	3	Fire Brick	41	PNPO	Pyridoxine-5'-phosphate oxidase; Catalyzes the oxidation of either pyridoxine 5'- phosphate (PNP) or pyridoxamine 5'-phosphate (PMP) into pyridoxal 5'-phosphate (PLP)
MCL	3	Fire Brick	41	PRRT2	Proline rich transmembrane protein 2; Interferon induced transmembrane protein domain containing; Belongs to the CD225/Dispanin family
MCL	3	Fire Brick	41	RBFOX1	RNA binding protein fox-1 homolog 1; RNA-binding protein that regulates alternative splicing events by binding to 5'-UGCAUGU-3' elements. Regulates alternative splicing of tissue-specific exons and of differentially spliced exons during erythropoiesis
MCL	3	Fire Brick	41	RELN	Reelin; Extracellular matrix serine protease that plays a role in layering of neurons in the cerebral cortex and cerebellum. Regulates microtubule function in neurons and neuronal migration. Affects migration of sympathetic preganglionic neurons in the spinal cord, where it seems to act as a barrier to neuronal migration. Enzymatic activity is important for the modulation of cell adhesion. Bindin…
MCL	3	Fire Brick	41	RYR2	Ryanodine receptor 2; Calcium channel that mediates the release of Ca(2+) from the sarcoplasmic reticulum into the cytoplasm and thereby plays a key role in triggering cardiac muscle contraction. Aberrant channel activation can lead to cardiac arrhythmia. In cardiac myocytes, calcium release is triggered by increased Ca(2+) levels due to activation of the L-type calcium channel CACNA1C. The calci…
MCL	3	Fire Brick	41	SCN1A	Sodium channel protein type 1 subunit alpha; Mediates the voltage-dependent sodium ion permeability of excitable membranes. Assuming opened or closed conformations in response to the voltage difference across the membrane, the protein forms a sodium-selective channel through which Na(+) ions may pass in accordance with their electrochemical gradient. Plays a key role in brain, probably by regulat…
MCL	3	Fire Brick	41	SCN9A	Sodium channel protein type 9 subunit alpha; Mediates the voltage-dependent sodium ion permeability of excitable membranes. Assuming opened or closed conformations in response to the voltage difference across the membrane, the protein forms a sodium-selective channel through which Na(+) ions may pass in accordance with their electrochemical gradient. It is a tetrodotoxin-sensitive Na(+) channel i…
MCL	3	Fire Brick	41	SHANK2	SH3 and multiple ankyrin repeat domains protein 2; Seems to be an adapter protein in the postsynaptic density (PSD) of excitatory synapses that interconnects receptors of the postsynaptic membrane including NMDA-type and metabotropic glutamate receptors, and the actin-based cytoskeleton. May play a role in the structural and functional organization of the dendritic spine and synaptic junction; Be…
MCL	3	Fire Brick	41	SPTAN1	Spectrin alpha chain, non-erythrocytic 1; Fodrin, which seems to be involved in secretion, interacts with calmodulin in a calcium-dependent manner and is thus candidate for the calcium-dependent movement of the cytoskeleton at the membrane; EF-hand domain containing
MCL	3	Fire Brick	41	TBC1D24	TBC1 domain family member 24; May act as a GTPase-activating protein for Rab family protein(s). Involved in neuronal projections development, probably through a negative modulation of ARF6 function; Deafness associated genes
MCL	3	Fire Brick	41	TET3	Methylcytosine dioxygenase TET3; Dioxygenase that catalyzes the conversion of the modified genomic base 5-methylcytosine (5mC) into 5- hydroxymethylcytosine (5hmC) and plays a key role in epigenetic chromatin reprogramming in the zygote following fertilization. Also mediates subsequent conversion of 5hmC into 5-formylcytosine (5fC), and conversion of 5fC to 5-carboxylcytosine (5caC). Conversion o…
MCL	3	Fire Brick	41	UNC80	Unc-80 homolog, NALCN channel complex subunit; Protein unc-80 homolog; Component of the NALCN sodium channel complex, required for channel regulation. This complex is a cation channel activated by neuropeptides substance P, neurotensin, and extracellular calcium that regulates neuronal excitability by controlling the sizes of NALCN-dependent sodium-leak current. UNC80 is essential for NALCN sensi…
MCL	4	Sandy Brown	38	ACADM	Medium-chain specific acyl-CoA dehydrogenase, mitochondrial; Acyl-CoA dehydrogenase specific for acyl chain lengths of 4 to 16 that catalyzes the initial step of fatty acid beta- oxidation. Utilizes the electron transfer flavoprotein (ETF) as an electron acceptor to transfer electrons to the main mitochondrial respiratory chain via ETF-ubiquinone oxidoreductase (ETF dehydrogenase)
MCL	4	Sandy Brown	38	ACADS	Short-chain specific acyl-CoA dehydrogenase, mitochondrial; Introduces a double bond at position 2 in saturated acyl-CoA's of short chain length, i.e. less than 6 carbon atoms; Belongs to the acyl-CoA dehydrogenase family
MCL	4	Sandy Brown	38	ACADSB	Short/branched chain specific acyl-CoA dehydrogenase, mitochondrial; Has greatest activity toward short branched chain acyl- CoA derivative such as (s)-2-methylbutyryl-CoA, isobutyryl-CoA, and 2-methylhexanoyl-CoA as well as toward short straight chain acyl-CoAs such as butyryl-CoA and hexanoyl-CoA. Can use valproyl- CoA as substrate and may play a role in controlling the metabolic flux of valpro…
MCL	4	Sandy Brown	38	ACO2	Aconitate hydratase, mitochondrial; Catalyzes the isomerization of citrate to isocitrate via cis-aconitate; Belongs to the aconitase/IPM isomerase family
MCL	4	Sandy Brown	38	ACSF3	Acyl-CoA synthetase family member 3, mitochondrial; Catalyzes the initial reaction in intramitochondrial fatty acid synthesis, by activating malonate and methylmalonate, but not acetate, into their respective CoA thioester. May have some preference toward very-long-chain substrates; Acyl-CoA synthetase family
MCL	4	Sandy Brown	38	ACY1	ABHD14A-ACY1 readthrough; Aminoacylase-1; Involved in the hydrolysis of N-acylated or N-acetylated amino acids (except L-aspartate); Belongs to the peptidase M20A family
MCL	4	Sandy Brown	38	ALDH5A1	Succinate-semialdehyde dehydrogenase, mitochondrial; Catalyzes one step in the degradation of the inhibitory neurotransmitter gamma-aminobutyric acid (GABA); Aldehyde dehydrogenases
MCL	4	Sandy Brown	38	ALDOB	Fructose-bisphosphate aldolase, class i; Belongs to the class I fructose-bisphosphate aldolase family
MCL	4	Sandy Brown	38	ASL	Argininosuccinate lyase
MCL	4	Sandy Brown	38	ASPA	Aspartoacylase; Catalyzes the deacetylation of N-acetylaspartic acid (NAA) to produce acetate and L-aspartate. NAA occurs in high concentration in brain and its hydrolysis NAA plays a significant part in the maintenance of intact white matter. In other tissues it act as a scavenger of NAA from body fluids
MCL	4	Sandy Brown	38	ASS1	Argininosuccinate synthase; One of the enzymes of the urea cycle, the metabolic pathway transforming neurotoxic amonia produced by protein catabolism into inocuous urea in the liver of ureotelic animals. Catalyzes the formation of arginosuccinate from aspartate, citrulline and ATP and together with ASL it is responsible for the biosynthesis of arginine in most body tissues; Belongs to the arginin…
MCL	4	Sandy Brown	38	BCKDHA	Branched chain keto acid dehydrogenase e1, alpha polypeptide; 2-oxoisovalerate dehydrogenase subunit alpha, mitochondrial; The branched-chain alpha-keto dehydrogenase complex catalyzes the overall conversion of alpha-keto acids to acyl-CoA and CO(2). It contains multiple copies of three enzymatic components: branched-chain alpha-keto acid decarboxylase (E1), lipoamide acyltransferase (E2) and lip…
MCL	4	Sandy Brown	38	BTD	Biotinidase; Catalytic release of biotin from biocytin, the product of biotin-dependent carboxylases degradation
MCL	4	Sandy Brown	38	CPA6	Carboxypeptidase A6; May be involved in the proteolytic inactivation of enkephalins and neurotensin in some brain areas. May convert inactive angiotensin I into the biologically active angiotensin II. Releases a C-terminal amino acid, with preference for large hydrophobic C-terminal amino acids and shows only very weak activity toward small amino acids and histidine; M14 carboxypeptidases
MCL	4	Sandy Brown	38	DBT	2-oxoisovalerate dehydrogenase E2 component (dihydrolipoyl transacylase); Dihydrolipoamide branched chain transacylase E2; The branched-chain alpha-keto dehydrogenase complex catalyzes the overall conversion of alpha-keto acids to acyl-CoA and CO(2). It contains multiple copies of three enzymatic components: branched-chain alpha-keto acid decarboxylase (E1), lipoamide acyltransferase (E2) and lip…
MCL	4	Sandy Brown	38	DHTKD1	Probable 2-oxoglutarate dehydrogenase E1 component DHKTD1, mitochondrial; The 2-oxoglutarate dehydrogenase complex catalyzes the overall conversion of 2-oxoglutarate to succinyl-CoA and CO(2). It contains multiple copies of three enzymatic components: 2- oxoglutarate dehydrogenase (E1), dihydrolipoamide succinyltransferase (E2) and lipoamide dehydrogenase (E3) (By similarity)
MCL	4	Sandy Brown	38	ECHS1	Enoyl-CoA hydratase, mitochondrial; Straight-chain enoyl-CoA thioesters from C4 up to at least C16 are processed, although with decreasing catalytic rate. Has high substrate specificity for crotonyl-CoA and moderate specificity for acryloyl-CoA, 3-methylcrotonyl-CoA and methacrylyl-CoA. It is noteworthy that binds tiglyl-CoA, but hydrates only a small amount of this substrate
MCL	4	Sandy Brown	38	FH	Fumarate hydratase, mitochondrial; Also acts as a tumor suppressor; Belongs to the class-II fumarase/aspartase family. Fumarase subfamily
MCL	4	Sandy Brown	38	FTCD	Formimidoyltransferase-cyclodeaminase; Folate-dependent enzyme, that displays both transferase and deaminase activity. Serves to channel one-carbon units from formiminoglutamate to the folate pool; In the N-terminal section; belongs to the formiminotransferase family
MCL	4	Sandy Brown	38	GCDH	Glutaryl-CoA dehydrogenase, mitochondrial; Catalyzes the oxidative decarboxylation of glutaryl-CoA to crotonyl-CoA and CO(2) in the degradative pathway of L-lysine, L-hydroxylysine, and L-tryptophan metabolism. It uses electron transfer flavoprotein as its electron acceptor. Isoform Short is inactive; Belongs to the acyl-CoA dehydrogenase family
MCL	4	Sandy Brown	38	GLDC	Glycine dehydrogenase (decarboxylating), mitochondrial; The glycine cleavage system catalyzes the degradation of glycine. The P protein (GLDC) binds the alpha-amino group of glycine through its pyridoxal phosphate cofactor; CO(2) is released and the remaining methylamine moiety is then transferred to the lipoamide cofactor of the H protein (GCSH)
MCL	4	Sandy Brown	38	GSS	Glutathione synthetase; Belongs to the eukaryotic GSH synthase family
MCL	4	Sandy Brown	38	HADHA	Trifunctional enzyme subunit alpha, mitochondrial; Bifunctional subunit; In the central section; belongs to the 3-hydroxyacyl- CoA dehydrogenase family
MCL	4	Sandy Brown	38	HLCS	Holocarboxylase synthetase; Biotin--protein ligase; Post-translational modification of specific protein by attachment of biotin. Acts on various carboxylases such as acetyl- CoA-carboxylase, pyruvate carboxylase, propionyl CoA carboxylase, and 3-methylcrotonyl CoA carboxylase
MCL	4	Sandy Brown	38	HMGCL	Hydroxymethylglutaryl-CoA lyase, mitochondrial; Key enzyme in ketogenesis (ketone body formation). Terminal step in leucine catabolism. Ketone bodies (beta- hydroxybutyrate, acetoacetate and acetone) are essential as an alternative source of energy to glucose, as lipid precursors and as regulators of metabolism
MCL	4	Sandy Brown	38	IVD	Isovaleryl-CoA dehydrogenase, mitochondrial; Acyl-CoA dehydrogenase family
MCL	4	Sandy Brown	38	KYNU	Kynureninase; Catalyzes the cleavage of L-kynurenine (L-Kyn) and L-3- hydroxykynurenine (L-3OHKyn) into anthranilic acid (AA) and 3- hydroxyanthranilic acid (3-OHAA), respectively. Has a preference for the L-3-hydroxy form. Also has cysteine-conjugate-beta-lyase activity
MCL	4	Sandy Brown	38	LIPT1	Lipoyltransferase 1, mitochondrial; Catalyzes the transfer of the lipoyl group from lipoyl- AMP to the specific lysine residue of lipoyl domains of lipoate- dependent enzymes; Belongs to the LplA family
MCL	4	Sandy Brown	38	MCCC1	Methylcrotonoyl-CoA carboxylase subunit alpha, mitochondrial; Biotin-attachment subunit of the 3-methylcrotonyl-CoA carboxylase, an enzyme that catalyzes the conversion of 3- methylcrotonyl-CoA to 3-methylglutaconyl-CoA, a critical step for leucine and isovaleric acid catabolism
MCL	4	Sandy Brown	38	MCCC2	Methylcrotonoyl-CoA carboxylase beta chain, mitochondrial; Carboxyltransferase subunit of the 3-methylcrotonyl-CoA carboxylase, an enzyme that catalyzes the conversion of 3- methylcrotonyl-CoA to 3-methylglutaconyl-CoA, a critical step for leucine and isovaleric acid catabolism; Belongs to the AccD/PCCB family
MCL	4	Sandy Brown	38	MMAA	Methylmalonic aciduria type A protein, mitochondrial; GTPase, binds and hydrolyzes GTP. Involved in intracellular vitamin B12 metabolism, mediates the transport of cobalamin (Cbl) into mitochondria for the final steps of adenosylcobalamin (AdoCbl) synthesis. Functions as a G-protein chaperone that assists AdoCbl cofactor delivery from MMAB to the methylmalonyl-CoA mutase (MUT) and reactivation of…
MCL	4	Sandy Brown	38	MMAB	Cob(I)yrinic acid a,c-diamide adenosyltransferase, mitochondrial; Adenosyltransferase involved in intracellular vitamin B12 metabolism. Generates adenosylcobalamin (AdoCbl) and directly delivers the cofactor to MUT in a transfer taht is stimulated by ATP-binding to MMAB and gated by MMAA; Cilia and flagella associated
MCL	4	Sandy Brown	38	MTRR	5-methyltetrahydrofolate-homocysteine methyltransferase reductase; Methionine synthase reductase; Involved in the reductive regeneration of cob(I)alamin (vitamin B12) cofactor required for the maintenance of methionine synthase in a functional state. Necessary for utilization of methylgroups from the folate cycle, thereby affecting transgenerational epigenetic inheritance. Folate pathway donates …
MCL	4	Sandy Brown	38	OTC	Ornithine carbamoyltransferase, mitochondrial; Ornithine carbamoyltransferase; Belongs to the ATCase/OTCase family
MCL	4	Sandy Brown	38	PC	Pyruvate carboxylase, mitochondrial; Pyruvate carboxylase catalyzes a 2-step reaction, involving the ATP-dependent carboxylation of the covalently attached biotin in the first step and the transfer of the carboxyl group to pyruvate in the second. Catalyzes in a tissue specific manner, the initial reactions of glucose (liver, kidney) and lipid (adipose tissue, liver, brain) synthesis from pyruvate
MCL	4	Sandy Brown	38	PCCA	This is one of the 2 subunits of the biotin-dependent propionyl-CoA carboxylase (PCC), a mitochondrial enzyme involved in the catabolism of odd chain fatty acids, branched-chain amino acids isoleucine, threonine, methionine, and valine and other metabolites . Propionyl-CoA carboxylase catalyzes the carboxylation of propionyl-CoA/propanoyl-CoA to D-methylmalonyl- CoA/(S)-methylmalonyl-CoA Within t…
MCL	4	Sandy Brown	38	PCCB	This is one of the 2 subunits of the biotin-dependent propionyl-CoA carboxylase (PCC), a mitochondrial enzyme involved in the catabolism of odd chain fatty acids, branched-chain amino acids isoleucine, threonine, methionine, and valine and other metabolites . Propionyl-CoA carboxylase catalyzes the carboxylation of propionyl-CoA/propanoyl-CoA to D-methylmalonyl- CoA/(S)-methylmalonyl-CoA . Within…
MCL	4	Sandy Brown	38	SMS	Spermine synthase; Catalyzes the production of spermine from spermidine and decarboxylated S-adenosylmethionine (dcSAM)
MCL	5	Brown	26	AIMP1	Aminoacyl tRNA synthase complex-interacting multifunctional protein 1; Non-catalytic component of the multisynthase complex. Stimulates the catalytic activity of cytoplasmic arginyl-tRNA synthase. Binds tRNA. Possesses inflammatory cytokine activity. Negatively regulates TGF-beta signaling through stabilization of SMURF2 by binding to SMURF2 and inhibiting its SMAD7-mediated degradation. Involved…
MCL	5	Brown	26	ASNS	Asparagine synthetase (glutamine-hydrolyzing); Asparagine synthetase
MCL	5	Brown	26	C12orf65	Probable peptide chain release factor C12orf65, mitochondrial; May act as a codon-independent translation release factor that has lost all stop codon specificity and directs the termination of translation in mitochondrion. May help rescuing stalled mitoribosomes during translation (By similarity)
MCL	5	Brown	26	CARS2	Probable cysteine--tRNA ligase, mitochondrial; cysteinyl-tRNA synthetase 2, mitochondrial; Belongs to the class-I aminoacyl-tRNA synthetase family
MCL	5	Brown	26	EFTUD2	116 kDa U5 small nuclear ribonucleoprotein component; Component of the U5 snRNP and the U4/U6-U5 tri-snRNP complex required for pre-mRNA splicing. Binds GTP; Belongs to the TRAFAC class translation factor GTPase superfamily. Classic translation factor GTPase family. EF-G/EF-2 subfamily
MCL	5	Brown	26	ELAC2	Zinc phosphodiesterase ELAC protein 2; Zinc phosphodiesterase, which displays mitochondrial tRNA 3'-processing endonuclease activity. Involved in tRNA maturation, by removing a 3'-trailer from precursor tRNA
MCL	5	Brown	26	FARS2	Phenylalanine--tRNA ligase, mitochondrial; Is responsible for the charging of tRNA(Phe) with phenylalanine in mitochondrial translation. To a lesser extent, also catalyzes direct attachment of m-Tyr (an oxidized version of Phe) to tRNA(Phe), thereby opening the way for delivery of the misacylated tRNA to the ribosome and incorporation of ROS-damaged amino acid into proteins; Belongs to the class-…
MCL	5	Brown	26	FBXL4	F-box and leucine rich repeat protein 4
MCL	5	Brown	26	GFM1	Elongation factor G, mitochondrial; Mitochondrial GTPase that catalyzes the GTP-dependent ribosomal translocation step during translation elongation. During this step, the ribosome changes from the pre-translocational (PRE) to the post-translocational (POST) state as the newly formed A- site-bound peptidyl-tRNA and P-site-bound deacylated tRNA move to the P and E sites, respectively. Catalyzes th…
MCL	5	Brown	26	IARS	Isoleucine--tRNA ligase, cytoplasmic; Catalyzes the specific attachment of an amino acid to its cognate tRNA in a 2 step reaction: the amino acid (AA) is first activated by ATP to form AA-AMP and then transferred to the acceptor end of the tRNA; Aminoacyl tRNA synthetases, Class I
MCL	5	Brown	26	KARS	Lysine--tRNA ligase; Catalyzes the specific attachment of an amino acid to its cognate tRNA in a 2 step reaction: the amino acid (AA) is first activated by ATP to form AA-AMP and then transferred to the acceptor end of the tRNA. When secreted, acts as a signaling molecule that induces immune response through the activation of monocyte/macrophages. Catalyzes the synthesis of the signaling molecule…
MCL	5	Brown	26	MTFMT	Methionyl-tRNA formyltransferase, mitochondrial; Formylates methionyl-tRNA in mitochondria. A single tRNA(Met) gene gives rise to both an initiator and an elongator species via an unknown mechanism (By similarity)
MCL	5	Brown	26	NARS	Asparagine--tRNA ligase, cytoplasmic; Aminoacyl tRNA synthetases, Class II
MCL	5	Brown	26	NARS2	Probable asparagine--tRNA ligase, mitochondrial; asparaginyl-tRNA synthetase 2, mitochondrial; Belongs to the class-II aminoacyl-tRNA synthetase family
MCL	5	Brown	26	POLR1C	DNA-directed RNA polymerases I and III subunit RPAC1; DNA-dependent RNA polymerase catalyzes the transcription of DNA into RNA using the four ribonucleoside triphosphates as substrates. Common component of RNA polymerases I and III which synthesize ribosomal RNA precursors and small RNAs, such as 5S rRNA and tRNAs, respectively. RPAC1 is part of the Pol core element with the central large cleft a…
MCL	5	Brown	26	POLR3A	DNA-directed RNA polymerase III subunit RPC1; DNA-dependent RNA polymerase catalyzes the transcription of DNA into RNA using the four ribonucleoside triphosphates as substrates. Largest and catalytic core component of RNA polymerase III which synthesizes small RNAs, such as 5S rRNA and tRNAs. Forms the polymerase active center together with the second largest subunit. A single-stranded DNA templa…
MCL	5	Brown	26	POLR3B	DNA-directed RNA polymerase III subunit RPC2; DNA-dependent RNA polymerase catalyzes the transcription of DNA into RNA using the four ribonucleoside triphosphates as substrates. Second largest core component of RNA polymerase III which synthesizes small RNAs, such as 5S rRNA and tRNAs. Proposed to contribute to the polymerase catalytic activity and forms the polymerase active center together with…
MCL	5	Brown	26	PRF1	Perforin-1; Plays a key role in secretory granule-dependent cell death, and in defense against virus-infected or neoplastic cells. Plays an important role in killing other cells that are recognized as non-self by the immune system, e.g. in transplant rejection or some forms of autoimmune disease. Can insert into the membrane of target cells in its calcium-bound form, oligomerize and form large po…
MCL	5	Brown	26	RARS2	Probable arginine--tRNA ligase, mitochondrial; arginyl-tRNA synthetase 2, mitochondrial; Aminoacyl tRNA synthetases, Class I
MCL	5	Brown	26	SARS2	Serine--tRNA ligase, mitochondrial; Catalyzes the attachment of serine to tRNA(Ser). Is also probably able to aminoacylate tRNA(Sec) with serine, to form the misacylated tRNA L-seryl-tRNA(Sec), which will be further converted into selenocysteinyl-tRNA(Sec); Aminoacyl tRNA synthetases, Class II
MCL	5	Brown	26	TRIT1	tRNA dimethylallyltransferase; Catalyzes the transfer of a dimethylallyl group onto the adenine at position 37 of both cytosolic and mitochondrial tRNAs, leading to the formation of N6-(dimethylallyl)adenosine (i(6)A); Belongs to the IPP transferase family
MCL	5	Brown	26	TRMT1	tRNA (guanine(26)-N(2))-dimethyltransferase; Dimethylates a single guanine residue at position 26 of most tRNAs using S-adenosyl-L-methionine as donor of the methyl groups; Belongs to the class I-like SAM-binding methyltransferase superfamily. Trm1 family
MCL	5	Brown	26	TRMT5	tRNA (guanine(37)-N1)-methyltransferase; Involved in mitochondrial tRNA methylation. Specifically methylates the N1 position of guanosine-37 in various tRNAs. Methylation is not dependent on the nature of the nucleoside 5' of the target nucleoside. This is the first step in the biosynthesis of wybutosine (yW), a modified base adjacent to the anticodon of tRNAs and required for accurate decoding
MCL	5	Brown	26	TSFM	Elongation factor Ts, mitochondrial; Associates with the EF-Tu.GDP complex and induces the exchange of GDP to GTP. It remains bound to the aminoacyl-tRNA.EF- Tu.GTP complex up to the GTP hydrolysis stage on the ribosome; Belongs to the EF-Ts family
MCL	5	Brown	26	WARS2	Tryptophanyl trna synthetase 2, mitochondrial; Tryptophan--tRNA ligase, mitochondrial; Mitochondrial aminoacyl-tRNA synthetase that activate and transfer the amino acids to their corresponding tRNAs during the translation of mitochondrial genes and protein synthesis
MCL	5	Brown	26	YARS2	Tyrosine--tRNA ligase, mitochondrial; Catalyzes the attachment of tyrosine to tRNA(Tyr) in a two-step reaction: tyrosine is first activated by ATP to form Tyr- AMP and then transferred to the acceptor end of tRNA(Tyr); Belongs to the class-I aminoacyl-tRNA synthetase family
MCL	6	Yellow	22	BCS1L	Mitochondrial chaperone BCS1; Chaperone necessary for the assembly of mitochondrial respiratory chain complex III. Plays an important role in the maintenance of mitochondrial tubular networks, respiratory chain assembly and formation of the LETM1 complex; AAA ATPases
MCL	6	Yellow	22	COX20	Cytochrome c oxidase protein 20 homolog; Mitochondrial respiratory chain complex assembly factors; Belongs to the COX20 family
MCL	6	Yellow	22	ETHE1	Persulfide dioxygenase ETHE1, mitochondrial; Sulfur dioxygenase that plays an essential role in hydrogen sulfide catabolism in the mitochondrial matrix. Hydrogen sulfide (H(2)S) is first oxidized by SQRDL, giving rise to cysteine persulfide residues. ETHE1 consumes molecular oxygen to catalyze the oxidation of the persulfide, once it has been transferred to a thiophilic acceptor, such as glutathi…
MCL	6	Yellow	22	IBA57	Iron-sulfur cluster assembly factor iba57; Putative transferase CAF17, mitochondrial; Involved in the maturation of mitochondrial 4Fe-4S proteins functioning late in the iron-sulfur cluster assembly pathway
MCL	6	Yellow	22	LIAS	Lipoyl synthase, mitochondrial; Catalyzes the radical-mediated insertion of two sulfur atoms into the C-6 and C-8 positions of the octanoyl moiety bound to the lipoyl domains of lipoate-dependent enzymes, thereby converting the octanoylated domains into lipoylated derivatives
MCL	6	Yellow	22	NDUFA9	NADH dehydrogenase [ubiquinone] 1 alpha subcomplex subunit 9, mitochondrial; Accessory subunit of the mitochondrial membrane respiratory chain NADH dehydrogenase (Complex I), that is believed not to be involved in catalysis. Complex I functions in the transfer of electrons from NADH to the respiratory chain. The immediate electron acceptor for the enzyme is believed to be ubiquinone; NADH:ubiquin…
MCL	6	Yellow	22	NDUFAF2	NADH dehydrogenase [ubiquinone] 1 alpha subcomplex assembly factor 2; Acts as a molecular chaperone for mitochondrial complex I assembly. Complex I functions in the transfer of electrons from NADH to the respiratory chain. The immediate electron acceptor for the enzyme is believed to be ubiquinone
MCL	6	Yellow	22	NDUFAF3	NADH dehydrogenase [ubiquinone] 1 alpha subcomplex assembly factor 3; Essential factor for the assembly of mitochondrial NADH:ubiquinone oxidoreductase complex (complex I)
MCL	6	Yellow	22	NDUFAF5	Nadh dehydrogenase [ubiquinone] 1 alpha subcomplex assembly factor 5; Arginine-hydroxylase NDUFAF5, mitochondrial; Arginine hydroxylase involved in the assembly of mitochondrial NADH:ubiquinone oxidoreductase complex (complex I, MT-ND1) at early stages. Acts by mediating hydroxylation of 'Arg-111' of NDUFS7. May also have methyltransferase activity (Probable)
MCL	6	Yellow	22	NDUFB3	NADH dehydrogenase [ubiquinone] 1 beta subcomplex subunit 3; Accessory subunit of the mitochondrial membrane respiratory chain NADH dehydrogenase (Complex I), that is believed not to be involved in catalysis. Complex I functions in the transfer of electrons from NADH to the respiratory chain. The immediate electron acceptor for the enzyme is believed to be ubiquinone
MCL	6	Yellow	22	NDUFS4	NADH dehydrogenase [ubiquinone] iron-sulfur protein 4, mitochondrial; Accessory subunit of the mitochondrial membrane respiratory chain NADH dehydrogenase (Complex I), that is believed not to be involved in catalysis. Complex I functions in the transfer of electrons from NADH to the respiratory chain. The immediate electron acceptor for the enzyme is believed to be ubiquinone; NADH:ubiquinone oxi…
MCL	6	Yellow	22	NFU1	NFU1 iron-sulfur cluster scaffold homolog, mitochondrial; Iron-sulfur cluster scaffold protein which can assemble [4Fe-2S] clusters and deliver them to target proteins; Belongs to the NifU family
MCL	6	Yellow	22	NUBPL	Iron-sulfur protein NUBPL; Required for the assembly of the mitochondrial membrane respiratory chain NADH dehydrogenase (Complex I). May deliver of one or more Fe-S clusters to complex I subunits; Belongs to the Mrp/NBP35 ATP-binding proteins family
MCL	6	Yellow	22	POLG	DNA polymerase subunit gamma-1; Involved in the replication of mitochondrial DNA. Associates with mitochondrial DNA; Belongs to the DNA polymerase type-A family
MCL	6	Yellow	22	SCO2	Protein SCO2 homolog, mitochondrial; Acts as a copper chaperone, transporting copper to the Cu(A) site on the cytochrome c oxidase subunit II (COX2); Mitochondrial respiratory chain complex assembly factors
MCL	6	Yellow	22	SDHA	Succinate dehydrogenase [ubiquinone] flavoprotein subunit, mitochondrial; Flavoprotein (FP) subunit of succinate dehydrogenase (SDH) that is involved in complex II of the mitochondrial electron transport chain and is responsible for transferring electrons from succinate to ubiquinone (coenzyme Q). Can act as a tumor suppressor; Belongs to the FAD-dependent oxidoreductase 2 family. FRD/SDH subfami…
MCL	6	Yellow	22	SDHB	Succinate dehydrogenase [ubiquinone] iron-sulfur subunit, mitochondrial; Iron-sulfur protein (IP) subunit of succinate dehydrogenase (SDH) that is involved in complex II of the mitochondrial electron transport chain and is responsible for transferring electrons from succinate to ubiquinone (coenzyme Q)
MCL	6	Yellow	22	SUOX	Sulfite oxidase, mitochondrial; Sulfite oxidase
MCL	6	Yellow	22	SURF1	SURF1, cytochrome c oxidase assembly factor; Surfeit locus protein 1; Component of the MITRAC (mitochondrial translation regulation assembly intermediate of cytochrome c oxidase complex) complex, that regulates cytochrome c oxidase assembly
MCL	6	Yellow	22	TMEM126B	Complex I assembly factor TMEM126B, mitochondrial; Chaperone protein involved in the assembly of the mitochondrial NADH:ubiquinone oxidoreductase complex (complex I). Participates in constructing the membrane arm of complex I
MCL	6	Yellow	22	TTC19	Tetratricopeptide repeat protein 19, mitochondrial; Required for the preservation of the structural and functional integrity of mitochondrial respiratory complex III by allowing the physiological turnover of the Rieske protein UQCRFS1. Involved in the clearance of UQCRFS1 N-terminal fragments, which are produced upon incorporation of UQCRFS1 into the complex III and whose presence is detrimental …
MCL	6	Yellow	22	ZBTB18	Zinc finger and BTB domain-containing protein 18; Transcriptional repressor that plays a role in various developmental processes such as myogenesis and brain development. Plays a key role in myogenesis by directly repressing the expression of ID2 and ID3, 2 inhibitors of skeletal myogenesis. Also involved in controlling cell division of progenitor cells and regulating the survival of postmitotic …
MCL	7	Dark Golden Rod	20	ARSA	Arylsulfatase A; Hydrolyzes cerebroside sulfate; Belongs to the sulfatase family
MCL	7	Dark Golden Rod	20	ASAH1	N-acylsphingosine amidohydrolase 1; Acid ceramidase; Hydrolyzes the sphingolipid ceramide into sphingosine and free fatty acid
MCL	7	Dark Golden Rod	20	B4GALNT1	Beta-1,4 N-acetylgalactosaminyltransferase 1; Involved in the biosynthesis of gangliosides GM2, GD2 and GA2; Beta 4-glycosyltransferases
MCL	7	Dark Golden Rod	20	CERS1	annotation not available
MCL	7	Dark Golden Rod	20	GALC	Galactosylceramidase; Galactocerebrosidase; Hydrolyzes the galactose ester bonds of galactosylceramide, galactosylsphingosine, lactosylceramide, and monogalactosyldiglyceride. Enzyme with very low activity responsible for the lysosomal catabolism of galactosylceramide, a major lipid in myelin, kidney and epithelial cells of small intestine and colon; Belongs to the glycosyl hydrolase 59 family
MCL	7	Dark Golden Rod	20	GBA	Glucosylceramidase that catalyzes, within the lysosomal compartment, the hydrolysis of glucosylceramide/GlcCer into free ceramide and glucose . Thereby, plays a central role in the degradation of complex lipids and the turnover of cellular membranes . Through the production of ceramides, participates to the PKC-activated salvage pathway of ceramide formation . Also plays a role in cholesterol met…
MCL	7	Dark Golden Rod	20	HEXA	Beta-hexosaminidase subunit alpha; Responsible for the degradation of GM2 gangliosides, and a variety of other molecules containing terminal N-acetyl hexosamines, in the brain and other tissues. The form B is active against certain oligosaccharides. The form S has no measurable activity; Belongs to the glycosyl hydrolase 20 family
MCL	7	Dark Golden Rod	20	HGSNAT	Heparan-alpha-glucosaminide N-acetyltransferase; Lysosomal acetyltransferase that acetylates the non- reducing terminal alpha-glucosamine residue of intralysosomal heparin or heparan sulfate, converting it into a substrate for luminal alpha-N-acetyl glucosaminidase
MCL	7	Dark Golden Rod	20	IDUA	Alpha-L-iduronidase; Iduronidase, alpha-L-
MCL	7	Dark Golden Rod	20	MANBA	Beta-mannosidase; Exoglycosidase that cleaves the single beta-linked mannose residue from the non-reducing end of all N-linked glycoprotein oligosaccharides; Mannosidases type beta
MCL	7	Dark Golden Rod	20	MFSD8	Major facilitator superfamily domain-containing protein 8; May be a carrier that transport small solutes by using chemiosmotic ion gradients; Belongs to the major facilitator superfamily
MCL	7	Dark Golden Rod	20	NAGA	Alpha-N-acetylgalactosaminidase; Removes terminal alpha-N-acetylgalactosamine residues from glycolipids and glycopeptides. Required for the breakdown of glycolipids
MCL	7	Dark Golden Rod	20	NAGLU	Alpha-N-acetylglucosaminidase; Involved in the degradation of heparan sulfate
MCL	7	Dark Golden Rod	20	NPC1	Niemann-Pick C1 protein; Intracellular cholesterol transporter which acts in concert with NPC2 and plays an important role in the egress of cholesterol from the endosomal/lysosomal compartment. Both NPC1 and NPC2 function as the cellular 'tag team duo' (TTD) to catalyze the mobilization of cholesterol within the multivesicular environment of the late endosome (LE) to effect egress through the lim…
MCL	7	Dark Golden Rod	20	NPC2	Epididymal secretory protein E1; Intracellular cholesterol transporter which acts in concert with NPC1 and plays an important role in the egress of cholesterol from the endosomal/lysosomal compartment. Both NPC1 and NPC2 function as the cellular 'tag team duo' (TTD) to catalyze the mobilization of cholesterol within the multivesicular environment of the late endosome (LE) to effect egress through…
MCL	7	Dark Golden Rod	20	PPOX	Protoporphyrinogen/coproporphyrinogen iii oxidase; Protoporphyrinogen oxidase; Catalyzes the 6-electron oxidation of protoporphyrinogen-IX to form protoporphyrin-IX
MCL	7	Dark Golden Rod	20	PSAP	Prosaposin; Saposins are specific low-molecular mass non-enzymic proteins, they participate in the lysosomal degradation of sphingolipids, which takes place by the sequential action of specific hydrolases; Endogenous ligands
MCL	7	Dark Golden Rod	20	SGSH	N-sulphoglucosamine sulphohydrolase; Catalyzes a step in lysosomal heparan sulfate degradation; Belongs to the sulfatase family
MCL	7	Dark Golden Rod	20	SMPD1	Sphingomyelin phosphodiesterase; Converts sphingomyelin to ceramide. Also has phospholipase C activities toward 1,2-diacylglycerolphosphocholine and 1,2-diacylglycerolphosphoglycerol
MCL	7	Dark Golden Rod	20	TPP1	Tripeptidyl-peptidase 1; Lysosomal serine protease with tripeptidyl-peptidase I activity. May act as a non-specific lysosomal peptidase which generates tripeptides from the breakdown products produced by lysosomal proteinases. Requires substrates with an unsubstituted N-terminus (By similarity)
MCL	8	Khaki	18	ANO5	Anoctamin-5; Does not exhibit calcium-activated chloride channel (CaCC) activity; Anoctamins
MCL	8	Khaki	18	CAPN3	Calpain-3; Calcium-regulated non-lysosomal thiol-protease; Calpains
MCL	8	Khaki	18	COL18A1	Collagen alpha-1(XVIII) chain; Probably plays a major role in determining the retinal structure as well as in the closure of the neural tube; Belongs to the multiplexin collagen family
MCL	8	Khaki	18	COL1A1	Collagen alpha-1(I) chain; Type I collagen is a member of group I collagen (fibrillar forming collagen); Collagens
MCL	8	Khaki	18	COL4A2	Collagen alpha-2(IV) chain; Type IV collagen is the major structural component of glomerular basement membranes (GBM), forming a 'chicken-wire' meshwork together with laminins, proteoglycans and entactin/nidogen
MCL	8	Khaki	18	DMD	Dystrophin; Anchors the extracellular matrix to the cytoskeleton via F-actin. Ligand for dystroglycan. Component of the dystrophin- associated glycoprotein complex which accumulates at the neuromuscular junction (NMJ) and at a variety of synapses in the peripheral and central nervous systems and has a structural function in stabilizing the sarcolemma. Also implicated in signaling events and synap…
MCL	8	Khaki	18	FBN1	Fibrillin-1; Fibrillin-1: Structural component of the 10-12 nm diameter microfibrils of the extracellular matrix, which conveys both structural and regulatory properties to load-bearing connective tissues. Fibrillin-1- containing microfibrils provide long-term force bearing structural support. In tissues such as the lung, blood vessels and skin, microfibrils form the periphery of the elastic fibe…
MCL	8	Khaki	18	FKTN	Fukutin; Glycosyltransferase involved in the biosynthesis of the phosphorylated O-mannosyl trisaccharide (N-acetylgalactosamine- beta-3-N-acetylglucosamine-beta-4-(phosphate-6-)mannose), a carbohydrate structure present in alpha-dystroglycan (DAG1), which is required for binding laminin G-like domain-containing extracellular proteins with high affinity. May interact with and reinforce a large com…
MCL	8	Khaki	18	ITGA7	Integrin subunit alpha 7; Integrin alpha-7; Integrin alpha-7/beta-1 is the primary laminin receptor on skeletal myoblasts and adult myofibers. During myogenic differentiation, it may induce changes in the shape and mobility of myoblasts, and facilitate their localization at laminin-rich sites of secondary fiber formation. It is involved in the maintenance of the myofibers cytoarchitecture as well…
MCL	8	Khaki	18	LAMA1	Laminin subunit alpha-1; Binding to cells via a high affinity receptor, laminin is thought to mediate the attachment, migration and organization of cells into tissues during embryonic development by interacting with other extracellular matrix components
MCL	8	Khaki	18	LAMA2	Laminin subunit alpha-2; Binding to cells via a high affinity receptor, laminin is thought to mediate the attachment, migration and organization of cells into tissues during embryonic development by interacting with other extracellular matrix components
MCL	8	Khaki	18	LTBP2	Latent-transforming growth factor beta-binding protein 2; May play an integral structural role in elastic-fiber architectural organization and/or assembly; Latent transforming growth factor beta binding proteins
MCL	8	Khaki	18	NEB	Nebulin
MCL	8	Khaki	18	PMP22	Peripheral myelin protein 22; Might be involved in growth regulation, and in myelinization in the peripheral nervous system; Belongs to the PMP-22/EMP/MP20 family
MCL	8	Khaki	18	POMGNT1	Protein O-linked-mannose beta-1,2-N-acetylglucosaminyltransferase 1; Participates in O-mannosyl glycosylation. May be responsible for the synthesis of the GlcNAc(beta1-2)Man(alpha1-)O- Ser/Thr moiety on alpha-dystroglycan and other O-mannosylated proteins. Is specific for alpha linked terminal mannose and does not have MGAT3, MGAT4, MGAT5, MGAT7 or MGAT8 activity; Belongs to the glycosyltransfera…
MCL	8	Khaki	18	RYR1	Ryanodine receptor 1; Calcium channel that mediates the release of Ca(2+) from the sarcoplasmic reticulum into the cytoplasm and thereby plays a key role in triggering muscle contraction following depolarization of T-tubules. Repeated very high-level exercise increases the open probability of the channel and leads to Ca(2+) leaking into the cytoplasm. Can also mediate the release of Ca(2+) from i…
MCL	8	Khaki	18	TNR	Tenascin-R; Neural extracellular matrix (ECM) protein involved in interactions with different cells and matrix components. These interactions can influence cellular behavior by either evoking a stable adhesion and differentiation, or repulsion and inhibition of neurite growth. Binding to cell surface gangliosides inhibits RGD-dependent integrin-mediated cell adhesion and results in an inhibition …
MCL	8	Khaki	18	TTN	Titin; Key component in the assembly and functioning of vertebrate striated muscles. By providing connections at the level of individual microfilaments, it contributes to the fine balance of forces between the two halves of the sarcomere. The size and extensibility of the cross-links are the main determinants of sarcomere extensibility properties of muscle. In non-muscle cells, seems to play a ro…
MCL	9	Olive Drab	14	ADA	Adenosine deaminase; Catalyzes the hydrolytic deamination of adenosine and 2- deoxyadenosine. Plays an important role in purine metabolism and in adenosine homeostasis. Modulates signaling by extracellular adenosine, and so contributes indirectly to cellular signaling events. Acts as a positive regulator of T-cell coactivation, by binding DPP4. Its interaction with DPP4 regulates lymphocyte- epit…
MCL	9	Olive Drab	14	ADAR	Double-stranded RNA-specific adenosine deaminase; Catalyzes the hydrolytic deamination of adenosine to inosine in double-stranded RNA (dsRNA) referred to as A-to-I RNA editing. This may affect gene expression and function in a number of ways that include mRNA translation by changing codons and hence the amino acid sequence of proteins; pre-mRNA splicing by altering splice site recognition sequenc…
MCL	9	Olive Drab	14	ADNP	Activity-dependent neuroprotector homeobox protein; Potential transcription factor. May mediate some of the neuroprotective peptide VIP-associated effects involving normal growth and cancer proliferation; ZF class homeoboxes and pseudogenes
MCL	9	Olive Drab	14	DPH1	2-(3-amino-3-carboxypropyl)histidine synthase subunit 1; Required for the first step in the synthesis of diphthamide, a post-translational modification of histidine which occurs in translation elongation factor 2 (EEF2). When overexpressed, suppresses colony formation ability and growth rate of ovarian cancer cells. Acts also as a tumor suppressor in lung and breast cancers (By similarity). Plays…
MCL	9	Olive Drab	14	IFIH1	Interferon-induced helicase C domain-containing protein 1; Innate immune receptor which acts as a cytoplasmic sensor of viral nucleic acids and plays a major role in sensing viral infection and in the activation of a cascade of antiviral responses including the induction of type I interferons and proinflammatory cytokines. Its ligands include mRNA lacking 2'-O- methylation at their 5' cap and lon…
MCL	9	Olive Drab	14	LARP7	La-related protein 7; Negative transcriptional regulator of polymerase II genes, acting by means of the 7SK RNP system. Within the 7SK RNP complex, the positive transcription elongation factor b (P-TEFb) is sequestered in an inactive form, preventing RNA polymerase II phosphorylation and subsequent transcriptional elongation; La ribonucleoprotein domain containing
MCL	9	Olive Drab	14	NBAS	Neuroblastoma-amplified sequence; Involved in Golgi-to-endoplasmic reticulum (ER) retrograde transport; the function is proposed to depend on its association in the NRZ complex which is believed to play a role in SNARE assembly at the ER
MCL	9	Olive Drab	14	PHF3	PHD finger protein 3
MCL	9	Olive Drab	14	POGZ	Pogo transposable element with ZNF domain; Plays a role in mitotic cell cycle progression and is involved in kinetochore assembly and mitotic sister chromatid cohesion. Probably through its association with CBX5 plays a role in mitotic chromosome segregation by regulating aurora kinase B/AURKB activation and AURKB and CBX5 dissociation from chromosome arms; DNA transposon derived genes
MCL	9	Olive Drab	14	RBM8A	RNA-binding protein 8A; Core component of the splicing-dependent multiprotein exon junction complex (EJC) deposited at splice junctions on mRNAs. The EJC is a dynamic structure consisting of core proteins and several peripheral nuclear and cytoplasmic associated factors that join the complex only transiently either during EJC assembly or during subsequent mRNA metabolism. The EJC marks the positi…
MCL	9	Olive Drab	14	RNASEH2B	Ribonuclease H2 subunit B; Non catalytic subunit of RNase H2, an endonuclease that specifically degrades the RNA of RNA:DNA hybrids. Participates in DNA replication, possibly by mediating the removal of lagging- strand Okazaki fragment RNA primers during DNA replication. Mediates the excision of single ribonucleotides from DNA:RNA duplexes
MCL	9	Olive Drab	14	SCAF4	Splicing factor, arginine/serine-rich 15; May act to physically and functionally link transcription and pre-mRNA processing; Belongs to the splicing factor SR family
MCL	9	Olive Drab	14	UPF1	Regulator of nonsense transcripts 1; RNA-dependent helicase and ATPase required for nonsense- mediated decay (NMD) of mRNAs containing premature stop codons. Is recruited to mRNAs upon translation termination and undergoes a cycle of phosphorylation and dephosphorylation; its phosphorylation appears to be a key step in NMD. Recruited by release factors to stalled ribosomes together with the SMG1C…
MCL	9	Olive Drab	14	UPF3B	Regulator of nonsense transcripts 3B; Involved in nonsense-mediated decay (NMD) of mRNAs containing premature stop codons by associating with the nuclear exon junction complex (EJC) and serving as link between the EJC core and NMD machinery. Recruits UPF2 at the cytoplasmic side of the nuclear envelope and the subsequent formation of an UPF1-UPF2- UPF3 surveillance complex (including UPF1 bound t…
MCL	10	Green	13	ATP1A1	Sodium/potassium-transporting ATPase subunit alpha-1; This is the catalytic component of the active enzyme, which catalyzes the hydrolysis of ATP coupled with the exchange of sodium and potassium ions across the plasma membrane. This action creates the electrochemical gradient of sodium and potassium ions, providing the energy for active transport of various nutrients; ATPase Na+/K+ transporting …
MCL	10	Green	13	BSND	Barttin (chloride channel ka/b beta subunit); Barttin; Functions as a beta-subunit for CLCNKA and CLCNKB chloride channels. In the kidney CLCNK/BSND heteromers mediate chloride reabsorption by facilitating its basolateral efflux. In the stria, CLCNK/BSND channels drive potassium secretion by recycling chloride for the basolateral SLC12A2 cotransporter
MCL	10	Green	13	DUOX2	Dual oxidase 2; Generates hydrogen peroxide which is required for the activity of thyroid peroxidase/TPO and lactoperoxidase/LPO. Plays a role in thyroid hormones synthesis and lactoperoxidase-mediated antimicrobial defense at the surface of mucosa. May have its own peroxidase activity through its N-terminal peroxidase-like domain
MCL	10	Green	13	DUOXA2	Dual oxidase maturation factor 2; Required for the maturation and the transport from the endoplasmic reticulum to the plasma membrane of functional DUOX2. May play a role in thyroid hormone synthesis; Belongs to the DUOXA family
MCL	10	Green	13	FOXE1	Forkhead box protein E1; Transcription factor that binds consensus sites on a variety of gene promoters and activate their transcription. Involved in proper palate formation, most probably through the expression of MSX1 and TGFB3 genes which are direct targets of this transcription factor. Also implicated in thyroid gland morphogenesis. May indirectly play a role in cell growth and migration thro…
MCL	10	Green	13	IYD	Iodotyrosine deiodinase 1; Catalyzes the oxidative NADPH-dependent deiodination of monoiodotyrosine (L-MIT) or diiodotyrosine (L-DIT). Acts during the hydrolysis of thyroglobulin to liberate iodide, which can then reenter the hormone-producing pathways. Acts more efficiently on monoiodotyrosine than on diiodotyrosine; Belongs to the nitroreductase family
MCL	10	Green	13	KCNJ1	ATP-sensitive inward rectifier potassium channel 1; In the kidney, probably plays a major role in potassium homeostasis. Inward rectifier potassium channels are characterized by a greater tendency to allow potassium to flow into the cell rather than out of it. Their voltage dependence is regulated by the concentration of extracellular potassium; as external potassium is raised, the voltage range …
MCL	10	Green	13	PAH	Phenylalanine-4-hydroxylase; Catalyzes the hydroxylation of L-phenylalanine to L-tyrosine
MCL	10	Green	13	SLC12A1	Solute carrier family 12 member 1; Electrically silent transporter system. Mediates sodium and chloride reabsorption. Plays a vital role in the regulation of ionic balance and cell volume; Belongs to the SLC12A transporter family
MCL	10	Green	13	SLC12A6	Solute carrier family 12 member 6; Mediates electroneutral potassium-chloride cotransport. May be activated by cell swelling. May contribute to cell volume homeostasis in single cells; Belongs to the SLC12A transporter family
MCL	10	Green	13	SLC26A4	Solute carrier family 26 (sodium-independent chloride/iodide transporter), member 4; Pendrin; Sodium-independent transporter of chloride and iodide; Belongs to the SLC26A/SulP transporter (TC 2.A.53) family
MCL	10	Green	13	TG	Thyroglobulin; Precursor of the iodinated thyroid hormones thyroxine (T4) and triiodothyronine (T3); Belongs to the type-B carboxylesterase/lipase family
MCL	10	Green	13	TPO	Thyroid peroxidase; Iodination and coupling of the hormonogenic tyrosines in thyroglobulin to yield the thyroid hormones T(3) and T(4); Belongs to the peroxidase family. XPO subfamily
MCL	11	Cyan	13	ATP7B	Copper-transporting ATPase 2; Copper ion transmembrane transporter involved in the export of copper out of the cells, such as the efflux of hepatic copper into the bile; ATPase copper transporting
MCL	11	Cyan	13	CP	Ceruloplasmin; Ceruloplasmin is a blue, copper-binding (6-7 atoms per molecule) glycoprotein. It has ferroxidase activity oxidizing Fe(2+) to Fe(3+) without releasing radical oxygen species. It is involved in iron transport across the cell membrane. Provides Cu(2+) ions for the ascorbate-mediated deaminase degradation of the heparan sulfate chains of GPC1. May also play a role in fetal lung devel…
MCL	11	Cyan	13	DCAF17	DDB1- and CUL4-associated factor 17; May function as a substrate receptor for CUL4-DDB1 E3 ubiquitin-protein ligase complex; DDB1 and CUL4 associated factors
MCL	11	Cyan	13	DDHD2	Phospholipase DDHD2; Phospholipase that hydrolyzes preferentially phosphatidic acid, including 1,2-dioleoyl-sn-phosphatidic acid, and phosphatidylethanolamine. Specifically binds to phosphatidylinositol 3-phosphate (PI(3)P), phosphatidylinositol 4- phosphate (PI(4)P), phosphatidylinositol 5-phosphate (PI(5)P) and possibly phosphatidylinositol 4,5-bisphosphate (PI(4,5)P2). May be involved in the m…
MCL	11	Cyan	13	EPG5	Ectopic P granules protein 5 homolog; Involved in autophagy. May play a role in a late step of autophagy, such as clearance of autophagosomal cargo
MCL	11	Cyan	13	FA2H	Fatty acid 2-hydroxylase; Required for alpha-hydroxylation of free fatty acids and the formation of alpha-hydroxylated sphingolipids; Belongs to the sterol desaturase family. SCS7 subfamily
MCL	11	Cyan	13	HEPHL1	Hephaestin-like protein 1; May function as a ferroxidase and may be involved in copper transport and homeostasis
MCL	11	Cyan	13	KIF1C	Kinesin-like protein KIF1C; Motor required for the retrograde transport of Golgi vesicles to the endoplasmic reticulum. Has a microtubule plus end- directed motility; Kinesins
MCL	11	Cyan	13	KIF5A	Kinesin heavy chain isoform 5A; Microtubule-dependent motor required for slow axonal transport of neurofilament proteins (NFH, NFM and NFL). Can induce formation of neurite-like membrane protrusions in non-neuronal cells in a ZFYVE27-dependent manner. The ZFYVE27-KIF5A complex contributes to the vesicular transport of VAPA, VAPB, SURF4, RAB11A, RAB11B and RTN3 proteins in neurons; Belongs to the …
MCL	11	Cyan	13	PANK2	Pantothenate kinase 2, mitochondrial; May be the master regulator of the CoA biosynthesis; Belongs to the type II pantothenate kinase family
MCL	11	Cyan	13	SLC39A8	Solute carrier family 39 (zinc transporter), member 8; Zinc transporter ZIP8; Acts as a manganese and zinc influx transporter. Plays a role in manganese reabsorption in the proximal tubule of the kidney and in manganese uptake into the brain; Belongs to the ZIP transporter (TC 2.A.5) family
MCL	11	Cyan	13	SPG7	Paraplegin; ATP-dependent zinc metalloprotease. Plays a role in the formation and regulation of the mitochondrial permeability transition pore (mPTP) and its proteolytic activity is dispensable for this function; In the N-terminal section; belongs to the AAA ATPase family
MCL	11	Cyan	13	WDR45	WD repeat domain phosphoinositide-interacting protein 4; Plays an important role in the autophagy pathway, which is the major intracellular degradation system by which cytoplasmic materials are packaged into autophagosomes and delivered to lysosomes for degradation; Belongs to the WD repeat SVP1 family
MCL	12	Sky Blue 2	12	ALG12	Dol-P-Man:Man(7)GlcNAc(2)-PP-Dol alpha-1,6-mannosyltransferase; Adds the eighth mannose residue in an alpha-1,6 linkage onto the dolichol-PP-oligosaccharide precursor (dolichol-PP- Man(7)GlcNAc(2)) required for protein glycosylation; Belongs to the glycosyltransferase 22 family
MCL	12	Sky Blue 2	12	ALG6	Dolichyl pyrophosphate Man9GlcNAc2 alpha-1,3-glucosyltransferase; Adds the first glucose residue to the lipid-linked oligosaccharide precursor for N-linked glycosylation. Transfers glucose from dolichyl phosphate glucose (Dol-P-Glc) onto the lipid-linked oligosaccharide Man(9)GlcNAc(2)-PP-Dol; Alpha-1,3-glucosyltransferases
MCL	12	Sky Blue 2	12	ALG8	Probable dolichyl pyrophosphate Glc1Man9GlcNAc2 alpha-1,3-glucosyltransferase; Adds the second glucose residue to the lipid-linked oligosaccharide precursor for N-linked glycosylation. Transfers glucose from dolichyl phosphate glucose (Dol-P-Glc) onto the lipid-linked oligosaccharide Glc(1)Man(9)GlcNAc(2)-PP-Dol (By similarity); Alpha-1,3-glucosyltransferases
MCL	12	Sky Blue 2	12	COG4	Conserved oligomeric Golgi complex subunit 4; Required for normal Golgi function. Plays a role in SNARE-pin assembly and Golgi-to-ER retrograde transport via its interaction with SCFD1; Belongs to the COG4 family
MCL	12	Sky Blue 2	12	DPAGT1	UDP-N-acetylglucosamine--dolichyl-phosphate N-acetylglucosaminephosphotransferase; Catalyzes the initial step in the synthesis of dolichol- P-P-oligosaccharides
MCL	12	Sky Blue 2	12	GALT	UDPglucose--hexose-1-phosphate uridylyltransferase; Galactose-1-phosphate uridylyltransferase; Plays an important role in galactose metabolism
MCL	12	Sky Blue 2	12	GMPPB	Mannose-1-phosphate guanyltransferase beta; Catalyzes the formation of GDP-mannose, an essential precursor of glycan moieties of glycoproteins and glycolipids; Belongs to the transferase hexapeptide repeat family
MCL	12	Sky Blue 2	12	GNE	Bifunctional UDP-N-acetylglucosamine 2-epimerase/N-acetylmannosamine kinase; Regulates and initiates biosynthesis of N- acetylneuraminic acid (NeuAc), a precursor of sialic acids. Plays an essential role in early development (By similarity). Required for normal sialylation in hematopoietic cells. Sialylation is implicated in cell adhesion, signal transduction, tumorigenicity and metastatic behavi…
MCL	12	Sky Blue 2	12	LEMD3	Inner nuclear membrane protein Man1; Can function as a specific repressor of TGF-beta, activin, and BMP signaling through its interaction with the R-SMAD proteins. Antagonizes TGF-beta-induced cell proliferation arrest; LEM domain containing
MCL	12	Sky Blue 2	12	MAN1B1	Endoplasmic reticulum mannosyl-oligosaccharide 1,2-alpha-mannosidase; Involved in glycoprotein quality control targeting of misfolded glycoproteins for degradation. It primarily trims a single alpha-1,2-linked mannose residue from Man(9)GlcNAc(2) to produce Man(8)GlcNAc(2), but at high enzyme concentrations, as found in the ER quality control compartment (ERQC), it further trims the carbohydrates…
MCL	12	Sky Blue 2	12	PMM2	Phosphomannomutase 2; Involved in the synthesis of the GDP-mannose and dolichol-phosphate-mannose required for a number of critical mannosyl transfer reactions; HAD Asp-based non-protein phosphatases
MCL	12	Sky Blue 2	12	TUSC3	Oligosaccharyltransferase complex subunit gamma; Tumor suppressor candidate 3; Acts as accessory component of the N-oligosaccharyl transferase (OST) complex which catalyzes the transfer of a high mannose oligosaccharide from a lipid-linked oligosaccharide donor to an asparagine residue within an Asn-X-Ser/Thr consensus motif in nascent polypeptide chains. Involved in N-glycosylation of STT3B-depe…
MCL	13	Sky Blue	8	AGL	Amylo-alpha-1, 6-glucosidase, 4-alpha-glucanotransferase; Glycogen debranching enzyme; Multifunctional enzyme acting as 1,4-alpha-D-glucan:1,4- alpha-D-glucan 4-alpha-D-glycosyltransferase and amylo-1,6- glucosidase in glycogen degradation; Belongs to the glycogen debranching enzyme family
MCL	13	Sky Blue	8	GBE1	1,4-alpha-glucan-branching enzyme; Required for normal glycogen accumulation. The alpha 1-6 branches of glycogen play an important role in increasing the solubility of the molecule (Probable); Belongs to the glycosyl hydrolase 13 family. GlgB subfamily
MCL	13	Sky Blue	8	PIGK	Phosphatidylinositol glycan anchor biosynthesis class k; GPI-anchor transamidase; Mediates GPI anchoring in the endoplasmic reticulum, by replacing a protein's C-terminal GPI attachment signal peptide with a pre-assembled GPI. During this transamidation reaction, the GPI transamidase forms a carbonyl intermediate with the substrate protein; Belongs to the peptidase C13 family
MCL	13	Sky Blue	8	PIGL	N-acetylglucosaminyl-phosphatidylinositol de-N-acetylase; Involved in the second step of GPI biosynthesis. De-N- acetylation of N-acetylglucosaminyl-phosphatidylinositol; Belongs to the PIGL family
MCL	13	Sky Blue	8	PIGO	GPI ethanolamine phosphate transferase 3; Ethanolamine phosphate transferase involved in glycosylphosphatidylinositol-anchor biosynthesis. Transfers ethanolamine phosphate to the GPI third mannose which links the GPI-anchor to the C-terminus of the proteins by an amide bond; Belongs to the PIGG/PIGN/PIGO family. PIGO subfamily
MCL	13	Sky Blue	8	PIGT	Phosphatidylinositol glycan anchor biosynthesis class t; GPI transamidase component PIG-T; Component of the GPI transamidase complex. Essential for transfer of GPI to proteins, particularly for formation of carbonyl intermediates; Belongs to the PIGT family
MCL	13	Sky Blue	8	PIGW	Phosphatidylinositol-glycan biosynthesis class W protein; Required for the transport of GPI-anchored proteins to the plasma membrane. Probable acetyltransferase, which acetylates the inositol ring of phosphatidylinositol during biosynthesis of GPI-anchor. Acetylation during GPI-anchor biosynthesis is not essential for the subsequent mannosylation and is usually removed soon after the attachment o…
MCL	13	Sky Blue	8	TCF20	Transcription factor 20; Transcriptional activator that binds to the regulatory region of MMP3 and thereby controls stromelysin expression. It stimulates the activity of various transcriptional activators such as JUN, SP1, PAX6 and ETS1, suggesting a function as a coactivator
MCL	14	Cornflower Blue 2	8	BCHE	Butyrylcholinesterase; Cholinesterase; Esterase with broad substrate specificity. Contributes to the inactivation of the neurotransmitter acetylcholine. Can degrade neurotoxic organophosphate esters; Belongs to the type-B carboxylesterase/lipase family
MCL	14	Cornflower Blue 2	8	CYP24A1	1,25-dihydroxyvitamin D(3) 24-hydroxylase, mitochondrial; Has a role in maintaining calcium homeostasis. Catalyzes the NADPH-dependent 24-hydroxylation of calcidiol (25- hydroxyvitamin D(3)) and calcitriol (1-alpha,25-dihydroxyvitamin D(3)). The enzyme can perform up to 6 rounds of hydroxylation of calcitriol leading to calcitroic acid. It also shows 23- hydroxylating activity leading to 1-alpha,…
MCL	14	Cornflower Blue 2	8	CYP27A1	Sterol 26-hydroxylase, mitochondrial; Catalyzes the first step in the oxidation of the side chain of sterol intermediates; the 27-hydroxylation of 5-beta- cholestane-3-alpha,7-alpha,12-alpha-triol. Has also a vitamin D3- 25-hydroxylase activity; Belongs to the cytochrome P450 family
MCL	14	Cornflower Blue 2	8	DHCR7	7-dehydrocholesterol reductase; Production of cholesterol by reduction of C7-C8 double bond of 7-dehydrocholesterol (7-DHC); Belongs to the ERG4/ERG24 family
MCL	14	Cornflower Blue 2	8	EBP	3-beta-hydroxysteroid-Delta(8),Delta(7)-isomerase; Catalyzes the conversion of Delta(8)-sterols to their corresponding Delta(7)-isomers; Belongs to the EBP family
MCL	14	Cornflower Blue 2	8	LIPA	Lysosomal acid lipase/cholesteryl ester hydrolase; Crucial for the intracellular hydrolysis of cholesteryl esters and triglycerides that have been internalized via receptor- mediated endocytosis of lipoprotein particles. Important in mediating the effect of LDL (low density lipoprotein) uptake on suppression of hydroxymethylglutaryl-CoA reductase and activation of endogenous cellular cholesteryl …
MCL	14	Cornflower Blue 2	8	MVK	Mevalonate kinase; May be a regulatory site in cholesterol biosynthetic pathway; Belongs to the GHMP kinase family. Mevalonate kinase subfamily
MCL	14	Cornflower Blue 2	8	SLC6A8	Solute carrier family 6 (neurotransmitter transporter, creatine) member 8; Sodium- and chloride-dependent creatine transporter 1; Required for the uptake of creatine in muscles and brain; Solute carriers
MCL	15	Blue	8	ABCD1	ATP-binding cassette sub-family D member 1; Probable transporter. The nucleotide-binding fold acts as an ATP-binding subunit with ATPase activity; Belongs to the ABC transporter superfamily. ABCD family. Peroxisomal fatty acyl CoA transporter (TC 3.A.1.203) subfamily
MCL	15	Blue	8	ELP4	Elongator complex protein 4; Acts as subunit of the RNA polymerase II elongator complex, which is a histone acetyltransferase component of the RNA polymerase II (Pol II) holoenzyme and is involved in transcriptional elongation. Elongator may play a role in chromatin remodeling and is involved in acetylation of histones H3 and probably H4
MCL	15	Blue	8	HSD17B4	Peroxisomal multifunctional enzyme type 2; Bifunctional enzyme acting on the peroxisomal beta- oxidation pathway for fatty acids. Catalyzes the formation of 3- ketoacyl-CoA intermediates from both straight-chain and 2-methyl- branched-chain fatty acids; Short chain dehydrogenase/reductase superfamily
MCL	15	Blue	8	PEX1	Peroxisomal biogenesis factor 1; Peroxisome biogenesis factor 1; Required for stability of PEX5 and protein import into the peroxisome matrix. Anchored by PEX26 to peroxisome membranes, possibly to form heteromeric AAA ATPase complexes required for the import of proteins into peroxisomes
MCL	15	Blue	8	PEX11B	Peroxisomal membrane protein 11B; Involved in peroxisomal proliferation. May regulate peroxisome division by recruiting the dynamin-related GTPase DNM1L to the peroxisomal membrane. Promotes membrane protrusion and elongation on the peroxisomal surface; Belongs to the peroxin-11 family
MCL	15	Blue	8	PEX16	Peroxisomal membrane protein PEX16; Required for peroxisome membrane biogenesis. May play a role in early stages of peroxisome assembly. Can recruit other peroxisomal proteins, such as PEX3 and PMP34, to de novo peroxisomes derived from the endoplasmic reticulum (ER). May function as receptor for PEX3; Belongs to the peroxin-16 family
MCL	15	Blue	8	PEX6	Peroxisomal biogenesis factor 6; Peroxisome assembly factor 2; Involved in peroxisome biosynthesis. Required for stability of the PTS1 receptor. Anchored by PEX26 to peroxisome membranes, possibly to form heteromeric AAA ATPase complexes required for the import of proteins into peroxisomes
MCL	15	Blue	8	PHYH	Phytanoyl-CoA dioxygenase, peroxisomal; Converts phytanoyl-CoA to 2-hydroxyphytanoyl-CoA
MCL	16	Cornflower Blue	7	CAPZA2	Capping actin protein of muscle z-line alpha subunit 2; F-actin-capping protein subunit alpha-2; F-actin-capping proteins bind in a Ca(2+)-independent manner to the fast growing ends of actin filaments (barbed end) thereby blocking the exchange of subunits at these ends. Unlike other capping proteins (such as gelsolin and severin), these proteins do not sever actin filaments
MCL	16	Cornflower Blue	7	CNOT3	CCR4-NOT transcription complex subunit 3; Component of the CCR4-NOT complex which is one of the major cellular mRNA deadenylases and is linked to various cellular processes including bulk mRNA degradation, miRNA-mediated repression, translational repression during translational initiation and general transcription regulation. Additional complex functions may be a consequence of its influence on m…
MCL	16	Cornflower Blue	7	CRB2	Crumbs 2, cell polarity complex component; Protein crumbs homolog 2; Apical polarity protein that plays a central role during the epithelial-to-mesenchymal transition (EMT) at gastrulation, when newly specified mesodermal cells move inside the embryo. Acts by promoting cell ingression, the process by which cells leave the epithelial epiblast and move inside the embryo to form a new tissue layer. …
MCL	16	Cornflower Blue	7	DMXL2	DmX-like protein 2; May serve as a scaffold protein for MADD and RAB3GA on synaptic vesicles. Plays a role in the brain as a key controller of neuronal and endocrine homeostatic processes (By similarity); Deafness associated genes
MCL	16	Cornflower Blue	7	FLCN	Folliculin; May be a tumor suppressor. May be involved in energy and/or nutrient sensing through the AMPK and mTOR signaling pathways. May regulate phosphorylation of RPS6KB1; DENN/MADD domain containing
MCL	16	Cornflower Blue	7	MADD	MAP kinase-activating death domain protein; Plays a significant role in regulating cell proliferation, survival and death through alternative mRNA splicing. Isoform 5 shows increased cell proliferation and isoform 2 shows decreased. Converts GDP-bound inactive form of RAB3A, RAB3C and RAB3D to the GTP-bound active forms. Component of the TNFRSF1A signaling complex: MADD links TNFRSF1A with MAP ki…
MCL	16	Cornflower Blue	7	RAB3GAP1	Rab3 GTPase-activating protein catalytic subunit; Probable catalytic subunit of a GTPase activating protein that has specificity for Rab3 subfamily (RAB3A, RAB3B, RAB3C and RAB3D). Rab3 proteins are involved in regulated exocytosis of neurotransmitters and hormones. Specifically converts active Rab3-GTP to the inactive form Rab3-GDP. Required for normal eye and brain development. May participate …
MCL	17	Purple	6	DPYD	Dihydropyrimidine dehydrogenase [NADP(+)]; Involved in pyrimidine base degradation. Catalyzes the reduction of uracil and thymine. Also involved the degradation of the chemotherapeutic drug 5-fluorouracil; Belongs to the dihydropyrimidine dehydrogenase family
MCL	17	Purple	6	HPDL	4-hydroxyphenylpyruvate dioxygenase-like protein; May have dioxygenase activity
MCL	17	Purple	6	MTHFR	Methylenetetrahydrofolate reductase (nadph); Methylenetetrahydrofolate reductase; Catalyzes the conversion of 5,10- methylenetetrahydrofolate to 5-methyltetrahydrofolate, a co- substrate for homocysteine remethylation to methionine
MCL	17	Purple	6	TYMP	Thymidine phosphorylase; May have a role in maintaining the integrity of the blood vessels. Has growth promoting activity on endothelial cells, angiogenic activity in vivo and chemotactic activity on endothelial cells in vitro; Minor histocompatibility antigens
MCL	17	Purple	6	UGT1A1	Udp glucuronosyltransferase family 1 member a1; UDP-glucuronosyltransferase 1-8; UDPGT is of major importance in the conjugation and subsequent elimination of potentially toxic xenobiotics and endogenous compounds. This isoform glucuronidates bilirubin IX- alpha to form both the IX-alpha-C8 and IX-alpha-C12 monoconjugates and diconjugate. Is also able to catalyze the glucuronidation of 17beta-est…
MCL	17	Purple	6	UPB1	Beta-ureidopropionase 1; Beta-ureidopropionase; Converts N-carbamoyl-beta-aminoisobutyrate and N- carbamoyl-beta-alanine (3-ureidopropanoate) to, respectively, beta-aminoisobutyrate and beta-alanine, ammonia and carbon dioxide
MCL	18	Medium Purple	6	ALOX12B	Arachidonate 12-lipoxygenase, 12R-type; Non-heme iron-containing dioxygenase that catalyzes the stereo-specific peroxidation of free and esterified polyunsaturated fatty acids generating a spectrum of bioactive lipid mediators. Mainly converts arachidonic acid to (12R)- hydroperoxyeicosatetraenoic acid/(12R)-HPETE and minor stereoisomers. In the skin, acts upstream of ALOXE3 on the lineolate moie…
MCL	18	Medium Purple	6	ALOXE3	Hydroperoxy icosatetraenoate dehydratase/isomerase; Hydroperoxide isomerase ALOXE3; Non-heme iron-containing lipoxygenase which is atypical in that it displays a prominent hydroperoxide isomerase activity and a reduced dioxygenase activity compared to other lipoxygenases. The hydroperoxide isomerase activity catalyzes the isomerization of hydroperoxides, derived from arachidonic and linoleic acid…
MCL	18	Medium Purple	6	HES7	Transcription factor HES-7; Transcriptional repressor. Represses transcription from both N box- and E box-containing promoters. May with HES1, cooperatively regulate somite formation in the presomitic mesoderm (PSM). May function as a segmentation clock, which is essential for coordinated somite segmentation (By similarity); Basic helix-loop-helix proteins
MCL	18	Medium Purple	6	RIPPLY2	Ripply transcriptional repressor 2; Protein ripply2; Plays a role in somitogenesis. Required for somite segregation and establishment of rostrocaudal polarity in somites (By similarity)
MCL	18	Medium Purple	6	SPINK5	Serine protease inhibitor Kazal-type 5; Serine protease inhibitor, probably important for the anti-inflammatory and/or antimicrobial protection of mucous epithelia. Contribute to the integrity and protective barrier function of the skin by regulating the activity of defense- activating and desquamation-involved proteases. Inhibits KLK5, it's major target, in a pH-dependent manner. Inhibits KLK7, …
MCL	18	Medium Purple	6	ZNF142	Zinc finger protein 142; May be involved in transcriptional regulation; Zinc fingers C2H2-type
MCL	19	Medium Purple 2	5	PREPL	Prolyl endopeptidase-like; Probable serine peptidase whose precise substrate specificity remains unclear. Does not cleave peptides after a arginine or lysine residue. May play a role in the regulation of synaptic vesiscle exocytosis
MCL	19	Medium Purple 2	5	SLC2A2	Solute carrier family 2, facilitated glucose transporter member 2; Facilitative glucose transporter. This isoform likely mediates the bidirectional transfer of glucose across the plasma membrane of hepatocytes and is responsible for uptake of glucose by the beta cells; may comprise part of the glucose-sensing mechanism of the beta cell. May also participate with the Na(+)/glucose cotransporter in…
MCL	19	Medium Purple 2	5	SLC36A2	Proton-coupled amino acid transporter 2; Involved in a pH-dependent electrogenic neuronal transport and sequestration of small amino acids. Transports glycine and proline. Inhibited by sarcosine (By similarity); Belongs to the amino acid/polyamine transporter 2 family
MCL	19	Medium Purple 2	5	SLC3A1	Neutral and basic amino acid transport protein rBAT; Involved in the high-affinity, sodium-independent transport of cystine and neutral and dibasic amino acids (system B(0,+)-like activity). May function as an activator of SLC7A9 and be involved in the high-affinity reabsorption of cystine in the kidney tubule; Solute carriers
MCL	19	Medium Purple 2	5	SLC6A19	Sodium-dependent neutral amino acid transporter B(0)AT1; Transporter that mediates resorption of neutral amino acids across the apical membrane of renal and intestinal epithelial cells. This uptake is sodium-dependent and chloride- independent; Belongs to the sodium:neurotransmitter symporter (SNF) (TC 2.A.22) family. SLC6A19 subfamily
MCL	20	Orchid 3	5	CLTCL1	Clathrin heavy chain like 1; Clathrin heavy chain 2; Clathrin is the major protein of the polyhedral coat of coated pits and vesicles. Two different adapter protein complexes link the clathrin lattice either to the plasma membrane or to the trans-Golgi network (By similarity)
MCL	20	Orchid 3	5	DST	Dystonin; Cytoskeletal linker protein. Acts as an integrator of intermediate filaments, actin and microtubule cytoskeleton networks. Required for anchoring either intermediate filaments to the actin cytoskeleton in neural and muscle cells or keratin- containing intermediate filaments to hemidesmosomes in epithelial cells. The proteins may self-aggregate to form filaments or a two- dimensional mes…
MCL	20	Orchid 3	5	GAN	Kelch-like protein 16 (gigaxonin); Gigaxonin; Probable cytoskeletal component that directly or indirectly plays an important role in neurofilament architecture. May act as a substrate-specific adapter of an E3 ubiquitin-protein ligase complex which mediates the ubiquitination and subsequent proteasomal degradation of target proteins. Controls degradation of TBCB. Controls degradation of MAP1B and…
MCL	20	Orchid 3	5	LZTR1	Leucine-zipper-like transcriptional regulator 1; Probable transcriptional regulator that may play a crucial role in embryogenesis; BTB domain containing
MCL	20	Orchid 3	5	SEC23B	SEC23 homolog B, COPII coat complex component; Protein transport protein Sec23B; Component of the coat protein complex II (COPII) which promotes the formation of transport vesicles from the endoplasmic reticulum (ER). The coat has two main functions, the physical deformation of the endoplasmic reticulum membrane into vesicles and the selection of cargo molecules for their transport to the Golgi c…
MCL	21	Orchid 2	5	SLC13A5	Solute carrier family 13 member 5; High-affinity sodium/citrate cotransporter that mediates citrate entry into cells. The transport process is electrogenic; it is the trivalent form of citrate rather than the divalent form that is recognized as a substrate. May facilitate the utilization of circulating citrate for the generation of metabolic energy and for the synthesis of fatty acids and cholest…
MCL	21	Orchid 2	5	SLC25A1	Tricarboxylate transport protein, mitochondrial; Involved in citrate-H(+)/malate exchange. Important for the bioenergetics of hepatic cells as it provides a carbon source for fatty acid and sterol biosyntheses, and NAD(+) for the glycolytic pathway; Solute carriers
MCL	21	Orchid 2	5	SLC25A46	Solute carrier family 25 member 46; May play a role in mitochondrial dynamics by controlling mitochondrial membrane fission; Belongs to the mitochondrial carrier (TC 2.A.29) family
MCL	21	Orchid 2	5	SLC5A6	Sodium-dependent multivitamin transporter; Transports pantothenate, biotin and lipoate in the presence of sodium; Solute carriers
MCL	21	Orchid 2	5	VPS13B	Vacuolar protein sorting-associated protein 13B; May be involved in protein sorting in post Golgi membrane traffic; Belongs to the VPS13 family
MCL	22	Violet	5	ASCC1	Activating signal cointegrator 1 complex subunit 1; Enhances NF-kappa-B, SRF and AP1 transactivation. In cells responding to gastrin-activated paracrine signals, it is involved in the induction of SERPINB2 expression by gastrin. May also play a role in the development of neuromuscular junction
MCL	22	Violet	5	GATM	Glycine amidinotransferase, mitochondrial; Catalyzes the biosynthesis of guanidinoacetate, the immediate precursor of creatine. Creatine plays a vital role in energy metabolism in muscle tissues. May play a role in embryonic and central nervous system development. May be involved in the response to heart failure by elevating local creatine synthesis; Belongs to the amidinotransferase family
MCL	22	Violet	5	SPATA5	Spermatogenesis-associated protein 5; May be involved in morphological and functional mitochondrial transformations during spermatogenesis; Belongs to the AAA ATPase family. AFG2 subfamily
MCL	22	Violet	5	SPATA5L1	Spermatogenesis-associated protein 5-like protein 1; Spermatogenesis associated 5 like 1; Belongs to the AAA ATPase family. AFG2 subfamily
MCL	22	Violet	5	SPRED2	Sprouty-related, EVH1 domain-containing protein 2; Negatively regulates Ras signaling pathways and downstream activation of MAP kinases
MCL	23	Violet 2	5	DONSON	Dna replication fork stabilization factor donson; Protein downstream neighbor of Son; Replisome component that maintains genome stability by protecting stalled or damaged replication forks. After the induction of replication stress, required for the stabilization of stalled replication forks, the efficient activation of the intra- S-phase and G/2M cell-cycle checkpoints and the maintenance of gen…
MCL	23	Violet 2	5	GNPTAB	N-acetylglucosamine-1-phosphotransferase subunits alpha/beta; Catalyzes the formation of mannose 6-phosphate (M6P) markers on high mannose type oligosaccharides in the Golgi apparatus. M6P residues are required to bind to the M6P receptors (MPR), which mediate the vesicular transport of lysosomal enzymes to the endosomal/prelysosomal compartment; EF-hand domain containing
MCL	23	Violet 2	5	PUF60	Poly(U)-binding-splicing factor PUF60; DNA- and RNA-binding protein, involved in several nuclear processes such as pre-mRNA splicing, apoptosis and transcription regulation. In association with FUBP1 regulates MYC transcription at the P2 promoter through the core-TFIIH basal transcription factor. Acts as a transcriptional repressor through the core-TFIIH basal transcription factor. Represses FUBP…
MCL	23	Violet 2	5	PURA	Transcriptional activator protein Pur-alpha; This is a probable transcription activator that specifically binds the purine-rich single strand of the PUR element located upstream of the MYC gene. May play a role in the initiation of DNA replication and in recombination
MCL	23	Violet 2	5	SON	Protein SON; RNA-binding protein that acts as a mRNA splicing cofactor by promoting efficient splicing of transcripts that possess weak splice sites. Specifically promotes splicing of many cell-cycle and DNA-repair transcripts that possess weak splice sites, such as TUBG1, KATNB1, TUBGCP2, AURKB, PCNT, AKT1, RAD23A, and FANCG. Probably acts by facilitating the interaction between Serine/arginine-…
MCL	24	Orchid	5	EXOSC3	Exosome complex component RRP40; Non-catalytic component of the RNA exosome complex which has 3'->5' exoribonuclease activity and participates in a multitude of cellular RNA processing and degradation events. In the nucleus, the RNA exosome complex is involved in proper maturation of stable RNA species such as rRNA, snRNA and snoRNA, in the elimination of RNA processing by-products and non-coding…
MCL	24	Orchid	5	EXOSC8	Exosome complex component RRP43; Non-catalytic component of the RNA exosome complex which has 3'->5' exoribonuclease activity and participates in a multitude of cellular RNA processing and degradation events. In the nucleus, the RNA exosome complex is involved in proper maturation of stable RNA species such as rRNA, snRNA and snoRNA, in the elimination of RNA processing by-products and non-coding…
MCL	24	Orchid	5	PARN	Poly(A)-specific ribonuclease PARN; 3'-exoribonuclease that has a preference for poly(A) tails of mRNAs, thereby efficiently degrading poly(A) tails. Exonucleolytic degradation of the poly(A) tail is often the first step in the decay of eukaryotic mRNAs and is also used to silence certain maternal mRNAs translationally during oocyte maturation and early embryonic development. Interacts with both …
MCL	24	Orchid	5	PNPT1	Polyribonucleotide nucleotidyltransferase 1, mitochondrial; RNA-binding protein implicated in numerous RNA metabolic processes. Catalyzes the phosphorolysis of single-stranded polyribonucleotides processively in the 3'-to-5' direction. Mitochondrial intermembrane factor with RNA-processing exoribonulease activity. Component of the mitochondrial degradosome (mtEXO) complex, that degrades 3' overha…
MCL	24	Orchid	5	SBDS	Ribosome maturation protein SBDS; Required for the assembly of mature ribosomes and ribosome biogenesis. Together with EFL1, triggers the GTP- dependent release of EIF6 from 60S pre-ribosomes in the cytoplasm, thereby activating ribosomes for translation competence by allowing 80S ribosome assembly and facilitating EIF6 recycling to the nucleus, where it is required for 60S rRNA processing and nu…
MCL	25	Pink	4	PACS1	Phosphofurin acidic cluster sorting protein 1; Coat protein that is involved in the localization of trans-Golgi network (TGN) membrane proteins that contain acidic cluster sorting motifs. Controls the endosome-to-Golgi trafficking of furin and mannose-6-phosphate receptor by connecting the acidic-cluster-containing cytoplasmic domain of these molecules with the adapter-protein complex-1 (AP-1) of…
MCL	25	Pink	4	PIEZO1	Piezo-type mechanosensitive ion channel component 1; Pore-forming subunit of a mechanosensitive non-specific cation channel. Generates currents characterized by a linear current-voltage relationship that are sensitive to ruthenium red and gadolinium. Plays a key role in epithelial cell adhesion by maintaining integrin activation through R-Ras recruitment to the ER, most probably in its activated …
MCL	25	Pink	4	TRPM1	Transient receptor potential cation channel subfamily M member 1; Cation channel essential for the depolarizing photoresponse of retinal ON bipolar cells. It is part of the GRM6 signaling cascade. May play a role in metastasis suppression (By similarity). May act as a spontaneously active, calcium-permeable plasma membrane channel; Belongs to the transient receptor (TC 1.A.4) family. LTrpC subfam…
MCL	25	Pink	4	TRPV4	Transient receptor potential cation channel subfamily V member 4; Non-selective calcium permeant cation channel involved in osmotic sensitivity and mechanosensitivity. Activation by exposure to hypotonicity within the physiological range exhibits an outward rectification. Also activated by heat, low pH, citrate and phorbol esters. Increase of intracellular Ca(2+) potentiates currents. Channel act…
MCL	26	Pale Violet Red	4	CC2D1A	Coiled-coil and C2 domain-containing protein 1A; Transcription factor that binds specifically to the DRE (dual repressor element) and represses HTR1A gene transcription in neuronal cells. The combination of calcium and ATP specifically inactivates the binding with FRE. May play a role in the altered regulation of HTR1A associated with anxiety and major depression. Mediates HDAC-independent repres…
MCL	26	Pale Violet Red	4	PRSS12	Serine protease 12; Neurotrypsin; Plays a role in neuronal plasticity and the proteolytic action may subserve structural reorganizations associated with learning and memory operations; Belongs to the peptidase S1 family
MCL	26	Pale Violet Red	4	PTPN23	Tyrosine-protein phosphatase non-receptor type 23; Plays a role in sorting of endocytic ubiquitinated cargos into multivesicular bodies (MVBs) via its interaction with the ESCRT-I complex (endosomal sorting complex required for transport I), and possibly also other ESCRT complexes. May act as a negative regulator of Ras-mediated mitogenic activity. Plays a role in ciliogenesis; Protein tyrosine p…
MCL	26	Pale Violet Red	4	VPS4A	Vacuolar protein sorting-associated protein 4A; Involved in late steps of the endosomal multivesicular bodies (MVB) pathway. Recognizes membrane-associated ESCRT-III assemblies and catalyzes their disassembly, possibly in combination with membrane fission. Redistributes the ESCRT-III components to the cytoplasm for further rounds of MVB sorting. MVBs contain intraluminal vesicles (ILVs) that are …
MCL	27	Light Coral	2	B4GALT7	Xylosylprotein 4-beta-galactosyltransferase; Beta-1,4-galactosyltransferase 7; Required for the biosynthesis of the tetrasaccharide linkage region of proteoglycans, especially for small proteoglycans in skin fibroblasts; Belongs to the glycosyltransferase 7 family
MCL	27	Light Coral	2	EXT2	Glucuronyl/n-acetylglucosaminyl transferase ext2; Exostosin-2; Glycosyltransferase required for the biosynthesis of heparan-sulfate. The EXT1/EXT2 complex possesses substantially higher glycosyltransferase activity than EXT1 or EXT2 alone. Appears to be a tumor suppressor. Required for the exosomal release of SDCBP, CD63 and syndecan

## Sheet: Enrichment subnetwork1
#category	term ID	term description	observed gene count	background gene count	strength	false discovery rate	matching proteins in your network (labels)
GO Biological Process
GO Process	GO:0016043	Cellular component organization	79	5447	0.43	4.77e-19	PHOX2B,MFN2,TUBGCP6,APC,HTRA2,CREBBP,KANSL1,SETD1A,EP300,NOTCH3,NBN,TINF2,FANCM,SOD1,ATM,HNRNPU,KIT,FANCC,MITF,ALB,SHH,CDT1,KMT2D,TERT,TUBB3,SMC1A,PPP2R1A,ZNF335,MRE11A,NKX2-5,WT1,RAD51C,PTPN11,SMAD4,MCPH1,PRMT7,ATR,CDK5RAP2,RET,ERCC6,ACTB,NF1,VCP,RTEL1,MICU1,MTOR,OPA1,PSEN2,PARK2,SYNE1,ASPM,DKC1,DNAJC6,STIL,PTEN,ATRX,HDAC8,ASXL1,FANCG,RAD50,BRCA2,CENPJ,BRPF1,FANCA,CHD2,KAT6A,GRIP1,TCF4,DDX3X,PAX…
GO Process	GO:0006996	Organelle organization	62	3450	0.52	3.54e-17	MFN2,TUBGCP6,HTRA2,CREBBP,KANSL1,SETD1A,EP300,NBN,TINF2,FANCM,SOD1,ATM,HNRNPU,KIT,SHH,CDT1,KMT2D,TERT,TUBB3,SMC1A,PPP2R1A,ZNF335,MRE11A,NKX2-5,RAD51C,MCPH1,PRMT7,ATR,CDK5RAP2,ERCC6,ACTB,NF1,VCP,RTEL1,MTOR,OPA1,PARK2,SYNE1,ASPM,DKC1,STIL,PTEN,ATRX,HDAC8,ASXL1,FANCG,RAD50,BRCA2,CENPJ,BRPF1,FANCA,CHD2,KAT6A,DDX3X,PAX6,EHMT1,BRCA1,KMT2A,DNM1L,GFAP,RPS19,RECQL4
GO Process	GO:0045935	Positive regulation of nucleobase-containing compound metabolic process	47	1927	0.65	1.89e-16	CDK13,PHOX2B,SIX3,CREBBP,EP300,NOTCH3,NBN,ATM,HNRNPU,LRP5,MITF,SHH,KMT2D,TERT,PROP1,MRE11A,NKX2-5,WT1,GATA4,SMAD4,ATR,CDK5RAP2,RET,ERCC6,VCP,RTEL1,MTOR,PARK2,DKC1,ATRX,HDAC8,AR,ASXL1,RAD50,BRCA2,PDX1,CENPJ,BRPF1,KAT6A,GRIP1,TCF4,DDX3X,PAX6,GDNF,BRCA1,KMT2A,WWOX
GO Process	GO:0051173	Positive regulation of nitrogen compound metabolic process	58	3239	0.52	1.37e-15	CDK13,CSNK2A1,PHOX2B,APC,HTRA2,SIX3,CREBBP,EP300,NOTCH3,NBN,FANCM,SOD1,ATM,HNRNPU,KIT,LRP5,MITF,SHH,KMT2D,TERT,FANCI,PROP1,MRE11A,NKX2-5,WT1,GATA4,PTPN11,SMAD4,ATR,CDK5RAP2,RET,ERCC6,VCP,TGFBR2,RTEL1,MTOR,PARK2,DKC1,PTEN,ATRX,HDAC8,AR,ASXL1,RAD50,BRCA2,PDX1,CENPJ,BRPF1,KAT6A,GRIP1,TCF4,DDX3X,PAX6,GDNF,BRCA1,KMT2A,WWOX,GHR
GO Process	GO:0009893	Positive regulation of metabolic process	63	3893	0.48	1.57e-15	CDK13,CSNK2A1,PHOX2B,MFN2,APC,HTRA2,SIX3,CREBBP,EP300,NOTCH3,NBN,FANCM,SOD1,ATM,HNRNPU,KIT,LRP5,MITF,SHH,CDT1,KMT2D,TERT,FANCI,PROP1,MRE11A,NKX2-5,WT1,GATA4,PTPN11,SMAD4,ATR,CDK5RAP2,RET,ERCC6,ACTB,VCP,TGFBR2,RTEL1,MTOR,PARK2,DKC1,PTEN,ATRX,HDAC8,AR,ASXL1,RAD50,BRCA2,PDX1,CENPJ,BRPF1,KAT6A,GRIP1,TCF4,DDX3X,PAX6,GDNF,EHMT1,BRCA1,KMT2A,WWOX,RPS19,GHR
GO Process	GO:0010604	Positive regulation of macromolecule metabolic process	60	3600	0.49	4.58e-15	CDK13,CSNK2A1,PHOX2B,APC,HTRA2,SIX3,CREBBP,EP300,NOTCH3,NBN,FANCM,SOD1,ATM,HNRNPU,KIT,LRP5,MITF,SHH,CDT1,KMT2D,TERT,FANCI,PROP1,MRE11A,NKX2-5,WT1,GATA4,PTPN11,SMAD4,ATR,CDK5RAP2,RET,ERCC6,ACTB,VCP,TGFBR2,RTEL1,MTOR,PARK2,DKC1,PTEN,ATRX,HDAC8,AR,ASXL1,RAD50,BRCA2,PDX1,CENPJ,BRPF1,KAT6A,GRIP1,TCF4,DDX3X,PAX6,GDNF,BRCA1,KMT2A,WWOX,GHR
GO Process	GO:0051276	Chromosome organization	35	1066	0.78	4.58e-15	CREBBP,KANSL1,SETD1A,EP300,NBN,TINF2,FANCM,ATM,HNRNPU,CDT1,KMT2D,TERT,SMC1A,PPP2R1A,ZNF335,MRE11A,RAD51C,PRMT7,ATR,ERCC6,ACTB,RTEL1,DKC1,ATRX,HDAC8,ASXL1,RAD50,BRCA2,BRPF1,CHD2,KAT6A,DDX3X,EHMT1,KMT2A,RECQL4
GO Process	GO:0048523	Negative regulation of cellular process	69	4874	0.42	6.04e-15	CDK13,CSNK2A1,PHOX2B,PROC,MFN2,APC,HTRA2,SIX3,CREBBP,EP300,NOTCH3,NBN,TINF2,SOD1,ATM,HNRNPU,KIT,LRP5,MITF,ALB,SHH,SLC18A2,CDT1,KMT2D,TERT,PROP1,PPP2R1A,MRE11A,NKX2-5,WT1,GATA4,PTPN11,SMAD4,MCPH1,ATR,CDK5RAP2,ERCC6,NF1,VCP,TGFBR2,RTEL1,MTOR,OPA1,PSEN2,PARK2,ASPM,DKC1,SOX3,STIL,PTEN,ATRX,HDAC8,AR,ASXL1,TDP2,RAD50,BRCA2,PDX1,CENPJ,SACS,KAT6A,DDX3X,PAX6,GDNF,EHMT1,BRCA1,KMT2A,DNM1L,WWOX
GO Process	GO:0031325	Positive regulation of cellular metabolic process	58	3413	0.5	8.43e-15	CDK13,PHOX2B,MFN2,HTRA2,SIX3,CREBBP,EP300,NOTCH3,NBN,FANCM,SOD1,ATM,HNRNPU,KIT,LRP5,MITF,SHH,CDT1,KMT2D,TERT,FANCI,PROP1,MRE11A,NKX2-5,WT1,GATA4,PTPN11,SMAD4,ATR,CDK5RAP2,RET,ERCC6,VCP,TGFBR2,RTEL1,MTOR,PARK2,DKC1,PTEN,ATRX,HDAC8,AR,ASXL1,RAD50,BRCA2,PDX1,CENPJ,BRPF1,KAT6A,GRIP1,TCF4,DDX3X,PAX6,GDNF,BRCA1,KMT2A,WWOX,GHR
GO Process	GO:0044260	Cellular macromolecule metabolic process	69	4976	0.41	1.59e-14	CDK13,CSNK2A1,PROC,APC,HTRA2,HERC2,CREBBP,KANSL1,SETD1A,EP300,NOTCH3,NBN,TINF2,FANCM,ATM,KIT,FANCC,MITF,ALB,CDT1,KMT2D,TERT,FANCI,SMC1A,PPP2R1A,ZNF335,MRE11A,RAD51C,PTPN11,SMAD4,PRMT7,ATR,RET,ERCC6,ACTB,NF1,VCP,TGFBR2,RTEL1,MTOR,ADCK3,PSEN2,PARK2,DKC1,DNAJC6,PTEN,ATRX,HDAC8,AR,ASXL1,TDP2,FANCG,RAD50,BRCA2,PDX1,BRPF1,FANCA,KAT6A,DDX3X,FANCL,PAX6,GDNF,EHMT1,BRCA1,EIF3F,KMT2A,RPS19,RECQL4,GHR
GO Process	GO:0032502	Developmental process	74	5841	0.37	3.57e-14	CDK13,PHOX2B,MFN2,APC,HTRA2,SIX3,HERC2,CREBBP,EP300,NOTCH3,NBN,SOD1,ATM,HNRNPU,KIT,FANCC,LRP5,MITF,SHH,SLC18A2,ANKRD11,KMT2D,TERT,PROP1,TUBB3,SMC1A,ZNF335,FRAS1,NKX2-5,WT1,GATA4,RAD51C,PTPN11,SMAD4,MCPH1,PRMT7,ATR,CDK5RAP2,OCA2,MYH7,RET,ERCC6,ACTB,NF1,TGFBR2,MTOR,OPA1,PARK2,SYNE1,ASPM,SOX3,STIL,PTEN,ATRX,AR,ASXL1,TDP2,FANCG,BRCA2,PDX1,FANCA,CHD2,KAT6A,GRIP1,TCF4,DDX3X,PAX6,GDNF,BRCA1,KMT2A,DNM1L,…
GO Process	GO:0045595	Regulation of cell differentiation	43	1874	0.63	4.25e-14	CDK13,PHOX2B,PROC,APC,SIX3,CREBBP,SETD1A,EP300,NOTCH3,SOD1,HNRNPU,KIT,LRP5,MITF,SHH,KMT2D,TERT,PPP2R1A,ZNF335,NKX2-5,GATA4,PTPN11,SMAD4,CDK5RAP2,RET,NF1,TGFBR2,MTOR,OPA1,PARK2,ASPM,SOX3,PTEN,AR,ASXL1,FANCA,GRIP1,TCF4,PAX6,GDNF,KMT2A,DNM1L,RPS19
GO Process	GO:0010557	Positive regulation of macromolecule biosynthetic process	43	1906	0.62	7.25e-14	CDK13,PHOX2B,SIX3,CREBBP,EP300,NOTCH3,ATM,HNRNPU,LRP5,MITF,SHH,CDT1,KMT2D,TERT,PROP1,NKX2-5,WT1,GATA4,SMAD4,ATR,CDK5RAP2,RET,ERCC6,MTOR,PARK2,DKC1,ATRX,HDAC8,AR,ASXL1,BRCA2,PDX1,CENPJ,BRPF1,KAT6A,GRIP1,TCF4,DDX3X,PAX6,GDNF,BRCA1,KMT2A,WWOX
GO Process	GO:0031328	Positive regulation of cellular biosynthetic process	44	2005	0.61	7.25e-14	CDK13,PHOX2B,SIX3,CREBBP,EP300,NOTCH3,ATM,HNRNPU,LRP5,MITF,SHH,CDT1,KMT2D,TERT,PROP1,NKX2-5,WT1,GATA4,SMAD4,ATR,CDK5RAP2,RET,ERCC6,VCP,MTOR,PARK2,DKC1,ATRX,HDAC8,AR,ASXL1,BRCA2,PDX1,CENPJ,BRPF1,KAT6A,GRIP1,TCF4,DDX3X,PAX6,GDNF,BRCA1,KMT2A,WWOX
GO Process	GO:0051171	Regulation of nitrogen compound metabolic process	73	5836	0.36	1.26e-13	CDK13,CSNK2A1,PHOX2B,APC,HTRA2,SIX3,CREBBP,EP300,NOTCH3,NBN,TINF2,FANCM,SOD1,ATM,HNRNPU,KIT,LRP5,MITF,SHH,CDT1,KMT2D,TERT,FANCI,PROP1,PPP2R1A,ZNF335,MRE11A,NKX2-5,WT1,GATA4,PTPN11,SMAD4,MCPH1,ATR,CDK5RAP2,RET,ERCC6,ACTB,NF1,VCP,TGFBR2,RTEL1,MTOR,PARK2,DKC1,SOX3,PTEN,ATRX,HDAC8,AR,ASXL1,TDP2,RAD50,BRCA2,PDX1,CENPJ,BRPF1,FANCA,CHD2,KAT6A,GRIP1,TCF4,DDX3X,PAX6,GDNF,EHMT1,BRCA1,EIF3F,KMT2A,DNM1L,WWOX…
GO Process	GO:0048519	Negative regulation of biological process	70	5389	0.38	1.47e-13	CDK13,CSNK2A1,PHOX2B,PROC,MFN2,APC,HTRA2,SIX3,CREBBP,EP300,NOTCH3,NBN,TINF2,SOD1,ATM,HNRNPU,KIT,LRP5,MITF,ALB,SHH,SLC18A2,CDT1,KMT2D,TERT,PROP1,PPP2R1A,MRE11A,NKX2-5,WT1,GATA4,PTPN11,SMAD4,MCPH1,ATR,CDK5RAP2,ERCC6,NF1,VCP,TGFBR2,RTEL1,MTOR,OPA1,PSEN2,PARK2,ASPM,DKC1,SOX3,STIL,PTEN,ATRX,HDAC8,AR,ASXL1,TDP2,RAD50,BRCA2,PDX1,CENPJ,SACS,KAT6A,DDX3X,PAX6,GDNF,EHMT1,BRCA1,KMT2A,DNM1L,WWOX,RPS19
GO Process	GO:1903508	Positive regulation of nucleic acid-templated transcription	40	1670	0.65	1.47e-13	CDK13,PHOX2B,SIX3,CREBBP,EP300,NOTCH3,ATM,HNRNPU,LRP5,MITF,SHH,KMT2D,TERT,PROP1,NKX2-5,WT1,GATA4,SMAD4,CDK5RAP2,RET,ERCC6,MTOR,PARK2,ATRX,HDAC8,AR,ASXL1,BRCA2,PDX1,CENPJ,BRPF1,KAT6A,GRIP1,TCF4,DDX3X,PAX6,GDNF,BRCA1,KMT2A,WWOX
GO Process	GO:0045893	Positive regulation of transcription, dna-templated	39	1587	0.66	1.50e-13	CDK13,PHOX2B,SIX3,CREBBP,EP300,NOTCH3,ATM,HNRNPU,LRP5,MITF,SHH,KMT2D,TERT,PROP1,NKX2-5,WT1,GATA4,SMAD4,CDK5RAP2,RET,ERCC6,MTOR,PARK2,ATRX,HDAC8,AR,ASXL1,BRCA2,PDX1,BRPF1,KAT6A,GRIP1,TCF4,DDX3X,PAX6,GDNF,BRCA1,KMT2A,WWOX
GO Process	GO:0031323	Regulation of cellular metabolic process	75	6239	0.35	1.98e-13	CDK13,CSNK2A1,PHOX2B,MFN2,APC,HTRA2,SIX3,CREBBP,EP300,NOTCH3,NBN,TINF2,FANCM,SOD1,ATM,HNRNPU,KIT,LRP5,MITF,SHH,SLC18A2,CDT1,KMT2D,TERT,FANCI,PROP1,PPP2R1A,ZNF335,MRE11A,NKX2-5,WT1,GATA4,PTPN11,SMAD4,MCPH1,ATR,CDK5RAP2,RET,ERCC6,ACTB,NF1,VCP,TGFBR2,RTEL1,MTOR,PARK2,DKC1,SOX3,PTEN,ATRX,HDAC8,AR,ASXL1,TDP2,RAD50,BRCA2,PDX1,CENPJ,BRPF1,FANCA,CHD2,KAT6A,GRIP1,TCF4,DDX3X,PAX6,GDNF,EHMT1,BRCA1,EIF3F,KMT…
GO Process	GO:0031324	Negative regulation of cellular metabolic process	49	2630	0.54	2.17e-13	CSNK2A1,APC,HTRA2,SIX3,CREBBP,EP300,NOTCH3,NBN,TINF2,ATM,HNRNPU,LRP5,MITF,SHH,SLC18A2,KMT2D,TERT,PROP1,PPP2R1A,NKX2-5,WT1,GATA4,SMAD4,MCPH1,ATR,ERCC6,NF1,RTEL1,MTOR,PARK2,DKC1,SOX3,PTEN,ATRX,HDAC8,AR,TDP2,RAD50,BRCA2,PDX1,CENPJ,KAT6A,DDX3X,PAX6,GDNF,EHMT1,BRCA1,KMT2A,WWOX
GO Process	GO:0050793	Regulation of developmental process	49	2648	0.53	2.73e-13	CDK13,PHOX2B,PROC,APC,HTRA2,SIX3,CREBBP,SETD1A,EP300,NOTCH3,SOD1,HNRNPU,KIT,LRP5,MITF,SHH,KMT2D,TERT,PPP2R1A,ZNF335,NKX2-5,WT1,GATA4,PTPN11,SMAD4,CDK5RAP2,RET,NF1,TGFBR2,MTOR,OPA1,PARK2,ASPM,SOX3,PTEN,AR,ASXL1,BRCA2,FANCA,GRIP1,TCF4,PAX6,GDNF,EHMT1,BRCA1,KMT2A,DNM1L,RPS19,GHR
GO Process	GO:0006259	DNA metabolic process	28	750	0.84	2.98e-13	HERC2,EP300,NBN,TINF2,FANCM,ATM,FANCC,TERT,FANCI,SMC1A,MRE11A,RAD51C,PRMT7,ATR,ERCC6,VCP,RTEL1,DKC1,ATRX,TDP2,FANCG,RAD50,BRCA2,FANCA,FANCL,EHMT1,BRCA1,RECQL4
GO Process	GO:0080090	Regulation of primary metabolic process	73	6032	0.35	5.71e-13	CDK13,CSNK2A1,PHOX2B,APC,HTRA2,SIX3,CREBBP,EP300,NOTCH3,NBN,TINF2,FANCM,SOD1,ATM,HNRNPU,KIT,LRP5,MITF,SHH,CDT1,KMT2D,TERT,FANCI,PROP1,PPP2R1A,ZNF335,MRE11A,NKX2-5,WT1,GATA4,PTPN11,SMAD4,MCPH1,ATR,CDK5RAP2,RET,ERCC6,ACTB,NF1,VCP,TGFBR2,RTEL1,MTOR,PARK2,DKC1,SOX3,PTEN,ATRX,HDAC8,AR,ASXL1,TDP2,RAD50,BRCA2,PDX1,CENPJ,BRPF1,FANCA,CHD2,KAT6A,GRIP1,TCF4,DDX3X,PAX6,GDNF,EHMT1,BRCA1,EIF3F,KMT2A,DNM1L,WWOX…
GO Process	GO:0048856	Anatomical structure development	69	5402	0.37	5.97e-13	CDK13,PHOX2B,MFN2,APC,HTRA2,SIX3,CREBBP,EP300,NOTCH3,NBN,SOD1,ATM,HNRNPU,KIT,FANCC,LRP5,MITF,SHH,SLC18A2,ANKRD11,KMT2D,TERT,PROP1,TUBB3,ZNF335,FRAS1,NKX2-5,WT1,GATA4,PTPN11,SMAD4,MCPH1,ATR,CDK5RAP2,OCA2,MYH7,RET,ERCC6,ACTB,NF1,TGFBR2,MTOR,OPA1,PARK2,SYNE1,ASPM,SOX3,STIL,PTEN,ATRX,AR,ASXL1,TDP2,FANCG,BRCA2,PDX1,FANCA,CHD2,KAT6A,GRIP1,TCF4,PAX6,GDNF,BRCA1,KMT2A,DNM1L,WWOX,RPS19,RECQL4
GO Process	GO:0048522	Positive regulation of cellular process	70	5579	0.36	7.04e-13	CDK13,CSNK2A1,PHOX2B,PROC,MFN2,APC,HTRA2,SIX3,CREBBP,EP300,NOTCH3,NBN,FANCM,SOD1,ATM,HNRNPU,KIT,LRP5,MITF,SHH,CDT1,KMT2D,TERT,FANCI,PROP1,PPP2R1A,ZNF335,MRE11A,NKX2-5,WT1,GATA4,RAD51C,PTPN11,SMAD4,ATR,CDK5RAP2,RET,ERCC6,NF1,VCP,TGFBR2,RTEL1,MTOR,OPA1,PSEN2,PARK2,ASPM,DKC1,PTEN,ATRX,HDAC8,AR,ASXL1,RAD50,BRCA2,PDX1,CENPJ,BRPF1,KAT6A,GRIP1,TCF4,DDX3X,PAX6,GDNF,BRCA1,KMT2A,DNM1L,WWOX,RPS19,GHR
GO Process	GO:0032501	Multicellular organismal process	78	6933	0.32	7.17e-13	CDK13,PHOX2B,PROC,MFN2,APC,HTRA2,SIX3,HERC2,CREBBP,EP300,NOTCH3,NBN,SOD1,ATM,HNRNPU,KIT,FANCC,LRP5,MITF,ALB,SHH,SLC18A2,ANKRD11,KMT2D,TERT,PROP1,TUBB3,SMC1A,PPP2R1A,ZNF335,FRAS1,NKX2-5,WT1,GATA4,RAD51C,PTPN11,SMAD4,MCPH1,PRMT7,ATR,CDK5RAP2,OCA2,MYH7,RET,ERCC6,ACTB,NF1,TGFBR2,MTOR,OPA1,PARK2,SYNE1,ASPM,SOX3,STIL,PTEN,ATRX,AR,ASXL1,TDP2,FANCG,BRCA2,PDX1,FANCA,CHD2,KAT6A,GRIP1,TCF4,DDX3X,FANCL,PAX6,…
GO Process	GO:0060255	Regulation of macromolecule metabolic process	75	6407	0.33	7.17e-13	CDK13,CSNK2A1,PHOX2B,APC,HTRA2,SIX3,CREBBP,EP300,NOTCH3,NBN,TINF2,FANCM,SOD1,ATM,HNRNPU,KIT,LRP5,MITF,SHH,CDT1,KMT2D,TERT,FANCI,PROP1,PPP2R1A,ZNF335,MRE11A,NKX2-5,WT1,GATA4,PTPN11,SMAD4,MCPH1,PRMT7,ATR,CDK5RAP2,RET,ERCC6,ACTB,NF1,VCP,TGFBR2,RTEL1,MTOR,PARK2,DKC1,SOX3,PTEN,ATRX,HDAC8,AR,ASXL1,TDP2,RAD50,BRCA2,PDX1,CENPJ,BRPF1,FANCA,CHD2,KAT6A,GRIP1,TCF4,DDX3X,PAX6,GDNF,EHMT1,BRCA1,EIF3F,KMT2A,DNM1…
GO Process	GO:0019219	Regulation of nucleobase-containing compound metabolic process	59	3982	0.44	7.33e-13	CDK13,PHOX2B,SIX3,CREBBP,EP300,NOTCH3,NBN,TINF2,ATM,HNRNPU,KIT,LRP5,MITF,SHH,CDT1,KMT2D,TERT,PROP1,PPP2R1A,ZNF335,MRE11A,NKX2-5,WT1,GATA4,SMAD4,MCPH1,ATR,CDK5RAP2,RET,ERCC6,VCP,RTEL1,MTOR,PARK2,DKC1,SOX3,PTEN,ATRX,HDAC8,AR,ASXL1,TDP2,RAD50,BRCA2,PDX1,CENPJ,BRPF1,FANCA,CHD2,KAT6A,GRIP1,TCF4,DDX3X,PAX6,GDNF,EHMT1,BRCA1,KMT2A,WWOX
GO Process	GO:0007275	Multicellular organism development	66	5023	0.38	1.15e-12	CDK13,PHOX2B,MFN2,APC,HTRA2,SIX3,CREBBP,EP300,NOTCH3,NBN,SOD1,ATM,HNRNPU,KIT,FANCC,LRP5,MITF,SHH,SLC18A2,ANKRD11,TERT,PROP1,TUBB3,ZNF335,FRAS1,NKX2-5,WT1,GATA4,PTPN11,SMAD4,MCPH1,ATR,CDK5RAP2,MYH7,RET,ERCC6,ACTB,NF1,TGFBR2,MTOR,OPA1,PARK2,ASPM,SOX3,STIL,PTEN,ATRX,AR,ASXL1,TDP2,FANCG,BRCA2,PDX1,FANCA,CHD2,KAT6A,GRIP1,TCF4,PAX6,GDNF,BRCA1,KMT2A,DNM1L,WWOX,RPS19,RECQL4
GO Process	GO:0045934	Negative regulation of nucleobase-containing compound metabolic process	37	1528	0.65	1.15e-12	SIX3,CREBBP,EP300,NOTCH3,NBN,TINF2,ATM,HNRNPU,MITF,SHH,KMT2D,TERT,PROP1,NKX2-5,WT1,SMAD4,MCPH1,ERCC6,RTEL1,MTOR,PARK2,DKC1,SOX3,ATRX,HDAC8,AR,TDP2,RAD50,PDX1,CENPJ,KAT6A,PAX6,GDNF,EHMT1,BRCA1,KMT2A,WWOX
GO Process	GO:0048869	Cellular developmental process	57	3757	0.45	1.15e-12	PHOX2B,APC,HTRA2,SIX3,EP300,NOTCH3,SOD1,ATM,HNRNPU,KIT,FANCC,LRP5,MITF,SHH,KMT2D,TERT,PROP1,TUBB3,ZNF335,NKX2-5,WT1,GATA4,PTPN11,SMAD4,PRMT7,ATR,CDK5RAP2,OCA2,RET,ERCC6,ACTB,NF1,TGFBR2,MTOR,OPA1,PARK2,SYNE1,ASPM,SOX3,PTEN,ATRX,AR,ASXL1,TDP2,FANCG,BRCA2,PDX1,CHD2,KAT6A,GRIP1,TCF4,DDX3X,PAX6,GDNF,DNM1L,WWOX,RPS19
GO Process	GO:0010628	Positive regulation of gene expression	45	2337	0.55	1.29e-12	CDK13,PHOX2B,SIX3,CREBBP,EP300,NOTCH3,SOD1,ATM,HNRNPU,KIT,LRP5,MITF,SHH,KMT2D,TERT,PROP1,MRE11A,NKX2-5,WT1,GATA4,PTPN11,SMAD4,CDK5RAP2,RET,ERCC6,ACTB,MTOR,PARK2,PTEN,ATRX,HDAC8,AR,ASXL1,BRCA2,PDX1,BRPF1,KAT6A,GRIP1,TCF4,DDX3X,PAX6,GDNF,BRCA1,KMT2A,WWOX
GO Process	GO:0033554	Cellular response to stress	39	1725	0.62	1.29e-12	MFN2,APC,HTRA2,HERC2,CREBBP,EP300,NBN,FANCM,SOD1,ATM,FANCC,ALB,TERT,FANCI,SMC1A,MRE11A,RAD51C,PTPN11,ATR,ERCC6,NF1,VCP,RTEL1,MTOR,OPA1,PARK2,PTEN,ATRX,TDP2,FANCG,RAD50,BRCA2,FANCA,CHD2,KAT6A,DDX3X,FANCL,BRCA1,RECQL4
GO Process	GO:0048468	Cell development	38	1629	0.63	1.29e-12	PHOX2B,HTRA2,SIX3,EP300,NOTCH3,SOD1,ATM,HNRNPU,KIT,FANCC,LRP5,SHH,KMT2D,TUBB3,ZNF335,NKX2-5,WT1,GATA4,PTPN11,SMAD4,OCA2,RET,ERCC6,ACTB,NF1,TGFBR2,MTOR,ASPM,PTEN,ATRX,AR,ASXL1,TDP2,FANCG,BRCA2,GRIP1,PAX6,GDNF
GO Process	GO:0030154	Cell differentiation	56	3702	0.45	2.45e-12	PHOX2B,APC,HTRA2,SIX3,EP300,NOTCH3,SOD1,ATM,HNRNPU,KIT,FANCC,LRP5,MITF,SHH,KMT2D,TERT,PROP1,TUBB3,ZNF335,NKX2-5,WT1,GATA4,PTPN11,SMAD4,PRMT7,CDK5RAP2,OCA2,RET,ERCC6,ACTB,NF1,TGFBR2,MTOR,OPA1,PARK2,SYNE1,ASPM,SOX3,PTEN,ATRX,AR,ASXL1,TDP2,FANCG,BRCA2,PDX1,CHD2,KAT6A,GRIP1,TCF4,DDX3X,PAX6,GDNF,DNM1L,WWOX,RPS19
GO Process	GO:0048513	Animal organ development	52	3197	0.48	2.49e-12	CDK13,PHOX2B,MFN2,HTRA2,SIX3,EP300,NOTCH3,SOD1,ATM,HNRNPU,KIT,FANCC,LRP5,MITF,SHH,ANKRD11,PROP1,TUBB3,ZNF335,FRAS1,NKX2-5,WT1,GATA4,PTPN11,SMAD4,MCPH1,CDK5RAP2,MYH7,RET,ACTB,NF1,TGFBR2,MTOR,OPA1,ASPM,SOX3,STIL,PTEN,ATRX,AR,ASXL1,FANCG,BRCA2,PDX1,FANCA,CHD2,KAT6A,PAX6,GDNF,KMT2A,WWOX,RPS19
GO Process	GO:0051726	Regulation of cell cycle	33	1230	0.69	2.80e-12	CDK13,CSNK2A1,PHOX2B,APC,HTRA2,SIX3,EP300,NBN,ATM,HNRNPU,LRP5,CDT1,TERT,PPP2R1A,MRE11A,RAD51C,PTPN11,MCPH1,ATR,CDK5RAP2,ERCC6,ACTB,MTOR,ASPM,STIL,PTEN,ATRX,HDAC8,BRCA2,CENPJ,DDX3X,EHMT1,BRCA1
GO Process	GO:0090304	Nucleic acid metabolic process	43	2178	0.56	2.80e-12	CDK13,HERC2,CREBBP,EP300,NOTCH3,NBN,TINF2,FANCM,ATM,HNRNPU,FANCC,MITF,TERT,FANCI,SMC1A,PPP2R1A,MRE11A,WT1,RAD51C,SMAD4,PRMT7,ATR,ERCC6,VCP,RTEL1,DKC1,PTEN,ATRX,AR,ASXL1,TDP2,FANCG,RAD50,BRCA2,PDX1,FANCA,DDX3X,FANCL,PAX6,EHMT1,BRCA1,RPS19,RECQL4
GO Process	GO:0019222	Regulation of metabolic process	77	6948	0.31	2.84e-12	CDK13,CSNK2A1,PHOX2B,MFN2,APC,HTRA2,SIX3,CREBBP,EP300,NOTCH3,NBN,TINF2,FANCM,SOD1,ATM,HNRNPU,KIT,LRP5,MITF,SHH,SLC18A2,CDT1,KMT2D,TERT,FANCI,PROP1,PPP2R1A,ZNF335,MRE11A,NKX2-5,WT1,GATA4,PTPN11,SMAD4,MCPH1,PRMT7,ATR,CDK5RAP2,RET,ERCC6,ACTB,NF1,VCP,TGFBR2,RTEL1,MTOR,PARK2,DKC1,SOX3,PTEN,ATRX,HDAC8,AR,ASXL1,TDP2,RAD50,BRCA2,PDX1,CENPJ,BRPF1,FANCA,CHD2,KAT6A,GRIP1,TCF4,DDX3X,PAX6,GDNF,EHMT1,BRCA1,EIF…
GO Process	GO:0051128	Regulation of cellular component organization	45	2402	0.54	2.99e-12	CDK13,CSNK2A1,MFN2,APC,HTRA2,SETD1A,EP300,NBN,TINF2,ATM,HNRNPU,KIT,LRP5,CDT1,PPP2R1A,ZNF335,MRE11A,WT1,PTPN11,SMAD4,MCPH1,ATR,CDK5RAP2,RET,VCP,RTEL1,MTOR,OPA1,PARK2,DKC1,DNAJC6,STIL,PTEN,ATRX,HDAC8,AR,RAD50,CENPJ,SACS,GRIP1,DDX3X,BRCA1,KMT2A,DNM1L,GFAP
GO Process	GO:0048518	Positive regulation of biological process	72	6112	0.34	3.36e-12	CDK13,CSNK2A1,PHOX2B,PROC,MFN2,APC,HTRA2,SIX3,CREBBP,EP300,NOTCH3,NBN,FANCM,SOD1,ATM,HNRNPU,KIT,LRP5,MITF,SHH,CDT1,KMT2D,TERT,FANCI,PROP1,PPP2R1A,ZNF335,MRE11A,NKX2-5,WT1,GATA4,RAD51C,PTPN11,SMAD4,ATR,CDK5RAP2,RET,ERCC6,ACTB,NF1,VCP,TGFBR2,RTEL1,MTOR,OPA1,PSEN2,PARK2,ASPM,DKC1,PTEN,ATRX,HDAC8,AR,ASXL1,RAD50,BRCA2,PDX1,CENPJ,BRPF1,KAT6A,GRIP1,TCF4,DDX3X,PAX6,GDNF,EHMT1,BRCA1,KMT2A,DNM1L,WWOX,RPS19…
GO Process	GO:0006281	DNA repair	23	522	0.91	3.45e-12	HERC2,EP300,NBN,FANCM,ATM,FANCC,FANCI,SMC1A,MRE11A,RAD51C,ATR,ERCC6,VCP,RTEL1,ATRX,TDP2,FANCG,RAD50,BRCA2,FANCA,FANCL,BRCA1,RECQL4
GO Process	GO:0006950	Response to stress	54	3485	0.46	3.45e-12	PROC,MFN2,APC,HTRA2,HERC2,CREBBP,EP300,NBN,FANCM,SOD1,ATM,KIT,FANCC,ALB,SHH,TERT,FANCI,SMC1A,MRE11A,GATA4,RAD51C,PTPN11,SMAD4,ATR,MYH7,RET,ERCC6,ACTB,NF1,VCP,TGFBR2,RTEL1,MICU1,MTOR,OPA1,PSEN2,PARK2,PTEN,ATRX,TDP2,FANCG,RAD50,BRCA2,PDX1,FANCA,CHD2,KAT6A,DDX3X,FANCL,PAX6,BRCA1,DNM1L,RPS19,RECQL4
GO Process	GO:0033044	Regulation of chromosome organization	20	359	2023-01-01	3.46e-12	APC,SETD1A,NBN,TINF2,ATM,HNRNPU,CDT1,ZNF335,MRE11A,SMAD4,MCPH1,ATR,CDK5RAP2,RTEL1,DKC1,ATRX,HDAC8,RAD50,BRCA1,KMT2A
GO Process	GO:0009892	Negative regulation of metabolic process	51	3124	0.48	3.86e-12	CSNK2A1,APC,HTRA2,SIX3,CREBBP,EP300,NOTCH3,NBN,TINF2,SOD1,ATM,HNRNPU,LRP5,MITF,SHH,SLC18A2,KMT2D,TERT,PROP1,PPP2R1A,NKX2-5,WT1,GATA4,SMAD4,MCPH1,ATR,ERCC6,NF1,RTEL1,MTOR,PARK2,DKC1,SOX3,PTEN,ATRX,HDAC8,AR,TDP2,RAD50,BRCA2,PDX1,CENPJ,KAT6A,DDX3X,PAX6,GDNF,EHMT1,BRCA1,KMT2A,WWOX,RPS19
GO Process	GO:0043170	Macromolecule metabolic process	72	6137	0.34	3.86e-12	CDK13,CSNK2A1,PROC,APC,HTRA2,HERC2,CREBBP,KANSL1,SETD1A,EP300,NOTCH3,NBN,TINF2,FANCM,ATM,HNRNPU,KIT,FANCC,MITF,ALB,SHH,CDT1,KMT2D,TERT,FANCI,SMC1A,PPP2R1A,ZNF335,MRE11A,WT1,RAD51C,PTPN11,SMAD4,PRMT7,ATR,RET,ERCC6,ACTB,NF1,VCP,TGFBR2,RTEL1,MTOR,ADCK3,PSEN2,PARK2,DKC1,DNAJC6,PTEN,ATRX,HDAC8,AR,ASXL1,TDP2,FANCG,RAD50,BRCA2,PDX1,BRPF1,FANCA,KAT6A,DDX3X,FANCL,PAX6,GDNF,EHMT1,BRCA1,EIF3F,KMT2A,RPS19,RE…
GO Process	GO:0045944	Positive regulation of transcription by rna polymerase ii	33	1253	0.69	3.86e-12	CDK13,PHOX2B,SIX3,CREBBP,EP300,NOTCH3,ATM,HNRNPU,LRP5,MITF,SHH,KMT2D,TERT,PROP1,NKX2-5,WT1,GATA4,SMAD4,ERCC6,PARK2,ATRX,HDAC8,AR,ASXL1,PDX1,KAT6A,TCF4,DDX3X,PAX6,GDNF,BRCA1,KMT2A,WWOX
GO Process	GO:0006974	Cellular response to dna damage stimulus	27	793	0.8	4.58e-12	APC,HTRA2,HERC2,EP300,NBN,FANCM,ATM,FANCC,FANCI,SMC1A,MRE11A,RAD51C,PTPN11,ATR,ERCC6,VCP,RTEL1,ATRX,TDP2,FANCG,RAD50,BRCA2,FANCA,CHD2,FANCL,BRCA1,RECQL4
GO Process	GO:0009889	Regulation of biosynthetic process	59	4210	0.41	5.88e-12	CDK13,PHOX2B,SIX3,CREBBP,EP300,NOTCH3,NBN,TINF2,SOD1,ATM,HNRNPU,KIT,LRP5,MITF,SHH,SLC18A2,CDT1,KMT2D,TERT,PROP1,PPP2R1A,ZNF335,NKX2-5,WT1,GATA4,SMAD4,MCPH1,ATR,CDK5RAP2,RET,ERCC6,VCP,MTOR,PARK2,DKC1,SOX3,PTEN,ATRX,HDAC8,AR,ASXL1,TDP2,BRCA2,PDX1,CENPJ,BRPF1,FANCA,CHD2,KAT6A,GRIP1,TCF4,DDX3X,PAX6,GDNF,EHMT1,BRCA1,EIF3F,KMT2A,WWOX
GO Process	GO:0043067	Regulation of programmed cell death	36	1569	0.63	9.75e-12	CSNK2A1,PROC,MFN2,APC,HTRA2,CREBBP,SOD1,ATM,KIT,LRP5,MITF,ALB,SHH,TERT,PROP1,PPP2R1A,MRE11A,NKX2-5,WT1,GATA4,RET,NF1,VCP,MTOR,OPA1,PSEN2,PARK2,STIL,PTEN,AR,PDX1,DDX3X,GDNF,BRCA1,DNM1L,WWOX
GO Process	GO:0010564	Regulation of cell cycle process	26	760	0.8	1.26e-11	CDK13,CSNK2A1,PHOX2B,APC,SIX3,EP300,NBN,ATM,HNRNPU,LRP5,CDT1,TERT,PPP2R1A,MRE11A,RAD51C,MCPH1,CDK5RAP2,STIL,PTEN,ATRX,HDAC8,BRCA2,CENPJ,DDX3X,EHMT1,BRCA1
GO Process	GO:0022414	Reproductive process	34	1400	0.65	1.26e-11	TUBGCP6,HERC2,NBN,FANCM,SOD1,ATM,KIT,FANCC,SHH,KMT2D,SMC1A,PPP2R1A,MRE11A,WT1,GATA4,RAD51C,PTPN11,SMAD4,PRMT7,OCA2,TGFBR2,MTOR,SYNE1,ASPM,SOX3,PTEN,ATRX,AR,FANCG,RAD50,BRCA2,FANCA,DDX3X,FANCL
GO Process	GO:0048731	System development	60	4426	0.4	1.26e-11	CDK13,PHOX2B,MFN2,HTRA2,SIX3,EP300,NOTCH3,NBN,SOD1,ATM,HNRNPU,KIT,FANCC,LRP5,MITF,SHH,ANKRD11,TERT,PROP1,TUBB3,ZNF335,FRAS1,NKX2-5,WT1,GATA4,PTPN11,SMAD4,MCPH1,CDK5RAP2,MYH7,RET,ERCC6,ACTB,NF1,TGFBR2,MTOR,OPA1,PARK2,ASPM,SOX3,STIL,PTEN,ATRX,AR,ASXL1,TDP2,FANCG,BRCA2,PDX1,FANCA,CHD2,KAT6A,GRIP1,TCF4,PAX6,GDNF,KMT2A,DNM1L,WWOX,RPS19
GO Process	GO:1901360	Organic cyclic compound metabolic process	50	3118	0.47	1.42e-11	CDK13,HTRA2,HERC2,CREBBP,EP300,NOTCH3,NBN,TINF2,FANCM,ATM,HNRNPU,FANCC,LRP5,MITF,SHH,TERT,FANCI,SMC1A,PPP2R1A,MRE11A,WT1,RAD51C,SMAD4,PRMT7,ATR,OCA2,ERCC6,VCP,RTEL1,MTOR,OPA1,PARK2,DKC1,PTEN,ATRX,AR,ASXL1,TDP2,FANCG,RAD50,BRCA2,PDX1,FANCA,DDX3X,FANCL,PAX6,EHMT1,BRCA1,RPS19,RECQL4
GO Process	GO:0010941	Regulation of cell death	37	1696	0.6	1.57e-11	CSNK2A1,PROC,MFN2,APC,HTRA2,CREBBP,SOD1,ATM,KIT,LRP5,MITF,ALB,SHH,TERT,PROP1,PPP2R1A,MRE11A,NKX2-5,WT1,GATA4,SMAD4,RET,NF1,VCP,MTOR,OPA1,PSEN2,PARK2,STIL,PTEN,AR,PDX1,DDX3X,GDNF,BRCA1,DNM1L,WWOX
GO Process	GO:0051172	Negative regulation of nitrogen compound metabolic process	44	2429	0.52	1.65e-11	CSNK2A1,APC,SIX3,CREBBP,EP300,NOTCH3,NBN,TINF2,ATM,HNRNPU,LRP5,MITF,SHH,KMT2D,TERT,PROP1,PPP2R1A,NKX2-5,WT1,SMAD4,MCPH1,ERCC6,NF1,RTEL1,MTOR,PARK2,DKC1,SOX3,PTEN,ATRX,HDAC8,AR,TDP2,RAD50,PDX1,CENPJ,KAT6A,DDX3X,PAX6,GDNF,EHMT1,BRCA1,KMT2A,WWOX
GO Process	GO:0065008	Regulation of biological quality	57	4042	0.42	1.65e-11	PHOX2B,PROC,MFN2,APC,CREBBP,EP300,NBN,TINF2,SOD1,ATM,HNRNPU,KIT,FANCC,LRP5,ALB,SHH,SLC18A2,ANKRD11,TERT,MRE11A,GATA4,RAD51C,PTPN11,SMAD4,ATR,MYH7,RET,ERCC6,ACTB,NF1,VCP,RTEL1,SLC6A9,MICU1,MTOR,OPA1,PARK2,SYNE1,ASPM,DKC1,PTEN,ATRX,HDAC8,AR,ASXL1,RAD50,BRCA2,PDX1,GRIP1,DDX3X,PAX6,GDNF,EHMT1,DNM1L,RPS19,RECQL4,GHR
GO Process	GO:0042981	Regulation of apoptotic process	35	1550	0.62	3.39e-11	CSNK2A1,PROC,MFN2,APC,HTRA2,CREBBP,SOD1,ATM,LRP5,MITF,ALB,SHH,TERT,PROP1,PPP2R1A,MRE11A,NKX2-5,WT1,GATA4,RET,NF1,VCP,MTOR,OPA1,PSEN2,PARK2,STIL,PTEN,AR,PDX1,DDX3X,GDNF,BRCA1,DNM1L,WWOX
GO Process	GO:0010556	Regulation of macromolecule biosynthetic process	56	3976	0.41	3.40e-11	CDK13,PHOX2B,SIX3,CREBBP,EP300,NOTCH3,NBN,TINF2,ATM,HNRNPU,KIT,LRP5,MITF,SHH,CDT1,KMT2D,TERT,PROP1,PPP2R1A,ZNF335,NKX2-5,WT1,GATA4,SMAD4,MCPH1,ATR,CDK5RAP2,RET,ERCC6,MTOR,PARK2,DKC1,SOX3,PTEN,ATRX,HDAC8,AR,ASXL1,TDP2,BRCA2,PDX1,CENPJ,BRPF1,FANCA,CHD2,KAT6A,GRIP1,TCF4,DDX3X,PAX6,GDNF,EHMT1,BRCA1,EIF3F,KMT2A,WWOX
GO Process	GO:0031326	Regulation of cellular biosynthetic process	57	4125	0.41	3.80e-11	CDK13,PHOX2B,SIX3,CREBBP,EP300,NOTCH3,NBN,TINF2,ATM,HNRNPU,KIT,LRP5,MITF,SHH,CDT1,KMT2D,TERT,PROP1,PPP2R1A,ZNF335,NKX2-5,WT1,GATA4,SMAD4,MCPH1,ATR,CDK5RAP2,RET,ERCC6,VCP,MTOR,PARK2,DKC1,SOX3,PTEN,ATRX,HDAC8,AR,ASXL1,TDP2,BRCA2,PDX1,CENPJ,BRPF1,FANCA,CHD2,KAT6A,GRIP1,TCF4,DDX3X,PAX6,GDNF,EHMT1,BRCA1,EIF3F,KMT2A,WWOX
GO Process	GO:0051239	Regulation of multicellular organismal process	50	3227	0.46	4.87e-11	PHOX2B,PROC,MFN2,APC,HTRA2,SIX3,CREBBP,SETD1A,EP300,NOTCH3,SOD1,KIT,LRP5,MITF,SHH,KMT2D,TERT,PPP2R1A,ZNF335,MRE11A,NKX2-5,WT1,GATA4,PTPN11,SMAD4,CDK5RAP2,MYH7,RET,NF1,TGFBR2,MTOR,OPA1,PARK2,ASPM,SOX3,PTEN,AR,BRCA2,FANCA,GRIP1,TCF4,DDX3X,PAX6,GDNF,EHMT1,BRCA1,KMT2A,DNM1L,RPS19,GHR
GO Process	GO:0010605	Negative regulation of macromolecule metabolic process	47	2875	0.48	5.79e-11	CSNK2A1,APC,SIX3,CREBBP,EP300,NOTCH3,NBN,TINF2,ATM,HNRNPU,LRP5,MITF,SHH,KMT2D,TERT,PROP1,PPP2R1A,NKX2-5,WT1,SMAD4,MCPH1,ATR,ERCC6,NF1,RTEL1,MTOR,PARK2,DKC1,SOX3,PTEN,ATRX,HDAC8,AR,TDP2,RAD50,BRCA2,PDX1,CENPJ,KAT6A,DDX3X,PAX6,GDNF,EHMT1,BRCA1,KMT2A,WWOX,RPS19
GO Process	GO:0006725	Cellular aromatic compound metabolic process	47	2882	0.48	6.24e-11	CDK13,HERC2,CREBBP,EP300,NOTCH3,NBN,TINF2,FANCM,ATM,HNRNPU,FANCC,MITF,TERT,FANCI,SMC1A,PPP2R1A,MRE11A,WT1,RAD51C,SMAD4,PRMT7,ATR,OCA2,ERCC6,VCP,RTEL1,MTOR,OPA1,PARK2,DKC1,PTEN,ATRX,AR,ASXL1,TDP2,FANCG,RAD50,BRCA2,PDX1,FANCA,DDX3X,FANCL,PAX6,EHMT1,BRCA1,RPS19,RECQL4
GO Process	GO:2000026	Regulation of multicellular organismal development	40	2096	0.55	6.61e-11	PHOX2B,PROC,SIX3,CREBBP,SETD1A,EP300,NOTCH3,SOD1,KIT,MITF,SHH,KMT2D,TERT,ZNF335,NKX2-5,WT1,GATA4,PTPN11,SMAD4,CDK5RAP2,RET,NF1,TGFBR2,MTOR,OPA1,PARK2,ASPM,SOX3,PTEN,AR,BRCA2,FANCA,GRIP1,TCF4,PAX6,GDNF,EHMT1,BRCA1,KMT2A,DNM1L
GO Process	GO:0006139	Nucleobase-containing compound metabolic process	45	2659	0.49	7.18e-11	CDK13,HERC2,CREBBP,EP300,NOTCH3,NBN,TINF2,FANCM,ATM,HNRNPU,FANCC,MITF,TERT,FANCI,SMC1A,PPP2R1A,MRE11A,WT1,RAD51C,SMAD4,PRMT7,ATR,ERCC6,VCP,RTEL1,MTOR,OPA1,DKC1,PTEN,ATRX,AR,ASXL1,TDP2,FANCG,RAD50,BRCA2,PDX1,FANCA,DDX3X,FANCL,PAX6,EHMT1,BRCA1,RPS19,RECQL4
GO Process	GO:0060249	Anatomical structure homeostasis	19	380	0.97	7.20e-11	NBN,TINF2,SOD1,ATM,ALB,ANKRD11,TERT,MRE11A,RAD51C,PTPN11,ATR,ERCC6,ACTB,RTEL1,PARK2,DKC1,RAD50,BRCA2,RECQL4
GO Process	GO:0048589	Developmental growth	19	389	0.96	1.05e-10	EP300,NBN,ATM,SHH,ANKRD11,KMT2D,NKX2-5,GATA4,PTPN11,SMAD4,ERCC6,TGFBR2,MTOR,ASPM,STIL,PTEN,ATRX,AR,BRCA2
GO Process	GO:0009790	Embryo development	28	1002	0.71	1.09e-10	MFN2,SIX3,CREBBP,EP300,NBN,SOD1,ATM,KIT,LRP5,SHH,ANKRD11,ZNF335,FRAS1,NKX2-5,WT1,GATA4,SMAD4,RET,NF1,TGFBR2,STIL,AR,BRCA2,PDX1,PAX6,GDNF,BRCA1,KMT2A
GO Process	GO:0048583	Regulation of response to stimulus	56	4114	0.4	1.27e-10	CSNK2A1,PROC,MFN2,APC,HTRA2,SIX3,CREBBP,EP300,NOTCH3,NBN,SOD1,ATM,KIT,LRP5,SHH,KMT2D,TERT,PPP2R1A,MRE11A,NKX2-5,GATA4,PTPN11,SMAD4,MCPH1,ATR,MYH7,RET,ERCC6,ACTB,NF1,VCP,TGFBR2,RTEL1,MICU1,MTOR,OPA1,PARK2,ASPM,PTEN,AR,ASXL1,RAD50,PDX1,CENPJ,BRPF1,FANCA,KAT6A,DDX3X,GDNF,EHMT1,BRCA1,KMT2A,DNM1L,WWOX,RPS19,GHR
GO Process	GO:1903506	Regulation of nucleic acid-templated transcription	51	3447	0.44	1.27e-10	CDK13,PHOX2B,SIX3,CREBBP,EP300,NOTCH3,ATM,HNRNPU,KIT,LRP5,MITF,SHH,CDT1,KMT2D,TERT,PROP1,PPP2R1A,ZNF335,NKX2-5,WT1,GATA4,SMAD4,MCPH1,CDK5RAP2,RET,ERCC6,MTOR,PARK2,SOX3,PTEN,ATRX,HDAC8,AR,ASXL1,TDP2,BRCA2,PDX1,CENPJ,BRPF1,FANCA,CHD2,KAT6A,GRIP1,TCF4,DDX3X,PAX6,GDNF,EHMT1,BRCA1,KMT2A,WWOX
GO Process	GO:0060322	Head development	25	788	0.77	1.55e-10	PHOX2B,HTRA2,SIX3,EP300,NOTCH3,ATM,FANCC,SHH,ANKRD11,PROP1,ZNF335,PTPN11,MCPH1,CDK5RAP2,ACTB,NF1,TGFBR2,MTOR,ASPM,SOX3,STIL,PTEN,ATRX,BRCA2,PAX6
GO Process	GO:0065007	Biological regulation	98	12171	0.17	1.64e-10	CDK13,CSNK2A1,PROKR2,PHOX2B,PROC,MFN2,APC,HTRA2,SIX3,HERC2,CREBBP,SETD1A,EP300,NOTCH3,NBN,TINF2,FANCM,SOD1,ATM,HNRNPU,KIT,FANCC,LRP5,MITF,ALB,SHH,SLC18A2,CDT1,ANKRD11,KMT2D,TERT,FANCI,PROP1,TUBB3,PPP2R1A,ZNF335,MRE11A,NKX2-5,WT1,GATA4,RAD51C,PTPN11,SMAD4,MCPH1,PRMT7,ATR,CDK5RAP2,MYH7,RET,ERCC6,ACTB,NF1,VCP,TGFBR2,RTEL1,SLC6A9,MICU1,MTOR,OPA1,PSEN2,PARK2,SYNE1,ASPM,DKC1,SOX3,DNAJC6,STIL,PTEN,ATRX,…
GO Process	GO:2000112	Regulation of cellular macromolecule biosynthetic process	54	3878	0.41	1.75e-10	CDK13,PHOX2B,SIX3,CREBBP,EP300,NOTCH3,NBN,TINF2,ATM,HNRNPU,KIT,LRP5,MITF,SHH,CDT1,KMT2D,TERT,PROP1,PPP2R1A,ZNF335,NKX2-5,WT1,GATA4,SMAD4,MCPH1,ATR,CDK5RAP2,RET,ERCC6,MTOR,PARK2,DKC1,SOX3,PTEN,ATRX,HDAC8,AR,ASXL1,BRCA2,PDX1,BRPF1,FANCA,CHD2,KAT6A,GRIP1,TCF4,DDX3X,PAX6,GDNF,EHMT1,BRCA1,EIF3F,KMT2A,WWOX
GO Process	GO:0051130	Positive regulation of cellular component organization	30	1209	0.66	2.33e-10	MFN2,APC,HTRA2,EP300,NBN,ATM,HNRNPU,KIT,LRP5,CDT1,MRE11A,SMAD4,ATR,CDK5RAP2,RET,VCP,RTEL1,MTOR,OPA1,PARK2,DKC1,ATRX,AR,RAD50,CENPJ,GRIP1,DDX3X,BRCA1,KMT2A,DNM1L
GO Process	GO:0006807	Nitrogen compound metabolic process	73	6852	0.29	2.53e-10	CDK13,CSNK2A1,PROC,APC,HTRA2,HERC2,CREBBP,KANSL1,SETD1A,EP300,NOTCH3,NBN,TINF2,FANCM,SOD1,ATM,HNRNPU,KIT,FANCC,MITF,ALB,SHH,KMT2D,TERT,FANCI,SMC1A,PPP2R1A,ZNF335,MRE11A,WT1,RAD51C,PTPN11,SMAD4,PRMT7,ATR,RET,ERCC6,ACTB,NF1,VCP,TGFBR2,RTEL1,MTOR,OPA1,ADCK3,PSEN2,PARK2,DKC1,DNAJC6,PTEN,ATRX,HDAC8,AR,ASXL1,TDP2,FANCG,RAD50,BRCA2,PDX1,BRPF1,FANCA,KAT6A,DDX3X,FANCL,PAX6,GDNF,EHMT1,BRCA1,EIF3F,KMT2A,RPS…
GO Process	GO:0033043	Regulation of organelle organization	31	1306	0.64	2.70e-10	CDK13,MFN2,APC,HTRA2,SETD1A,EP300,NBN,TINF2,ATM,HNRNPU,LRP5,CDT1,ZNF335,MRE11A,SMAD4,MCPH1,ATR,CDK5RAP2,RTEL1,MTOR,OPA1,PARK2,DKC1,STIL,ATRX,HDAC8,RAD50,CENPJ,BRCA1,KMT2A,DNM1L
GO Process	GO:0009887	Animal organ morphogenesis	27	967	0.71	2.73e-10	MFN2,SIX3,EP300,SOD1,FANCC,LRP5,SHH,ANKRD11,PROP1,ZNF335,FRAS1,NKX2-5,WT1,GATA4,SMAD4,MYH7,NF1,TGFBR2,MTOR,STIL,PTEN,AR,ASXL1,PDX1,PAX6,GDNF,WWOX
GO Process	GO:0007049	Cell cycle	31	1313	0.64	3.02e-10	CSNK2A1,TUBGCP6,APC,EP300,NBN,FANCM,ATM,HNRNPU,CDT1,FANCI,TUBB3,SMC1A,PPP2R1A,MRE11A,RAD51C,PTPN11,MCPH1,CDK5RAP2,VCP,RTEL1,MTOR,ASPM,STIL,ATRX,HDAC8,RAD50,BRCA2,CENPJ,FANCA,PAX6,BRCA1
GO Process	GO:0034641	Cellular nitrogen compound metabolic process	49	3282	0.44	3.13e-10	CDK13,HTRA2,HERC2,CREBBP,EP300,NOTCH3,NBN,TINF2,FANCM,SOD1,ATM,HNRNPU,FANCC,MITF,TERT,FANCI,SMC1A,PPP2R1A,MRE11A,WT1,RAD51C,SMAD4,PRMT7,ATR,ERCC6,VCP,RTEL1,MTOR,OPA1,PSEN2,DKC1,PTEN,ATRX,AR,ASXL1,TDP2,FANCG,RAD50,BRCA2,PDX1,FANCA,DDX3X,FANCL,PAX6,EHMT1,BRCA1,EIF3F,RPS19,RECQL4
GO Process	GO:0010468	Regulation of gene expression	60	4813	0.36	3.75e-10	CDK13,PHOX2B,SIX3,CREBBP,EP300,NOTCH3,SOD1,ATM,HNRNPU,KIT,LRP5,MITF,SHH,CDT1,KMT2D,TERT,PROP1,PPP2R1A,ZNF335,MRE11A,NKX2-5,WT1,GATA4,PTPN11,SMAD4,MCPH1,PRMT7,CDK5RAP2,RET,ERCC6,ACTB,NF1,TGFBR2,MTOR,PARK2,DKC1,SOX3,PTEN,ATRX,HDAC8,AR,ASXL1,BRCA2,PDX1,BRPF1,FANCA,CHD2,KAT6A,GRIP1,TCF4,DDX3X,PAX6,GDNF,EHMT1,BRCA1,EIF3F,KMT2A,DNM1L,WWOX,RPS19
GO Process	GO:0000723	Telomere maintenance	12	112	2023-03-01	4.46e-10	NBN,TINF2,ATM,TERT,MRE11A,RAD51C,ATR,RTEL1,DKC1,RAD50,BRCA2,RECQL4
GO Process	GO:0032204	Regulation of telomere maintenance	11	83	1.39	4.49e-10	NBN,TINF2,ATM,HNRNPU,MRE11A,ATR,RTEL1,DKC1,ATRX,HDAC8,RAD50
GO Process	GO:0051252	Regulation of rna metabolic process	52	3722	0.41	5.13e-10	CDK13,PHOX2B,SIX3,CREBBP,EP300,NOTCH3,ATM,HNRNPU,KIT,LRP5,MITF,SHH,CDT1,KMT2D,TERT,PROP1,PPP2R1A,ZNF335,NKX2-5,WT1,GATA4,SMAD4,MCPH1,CDK5RAP2,RET,ERCC6,MTOR,PARK2,DKC1,SOX3,PTEN,ATRX,HDAC8,AR,ASXL1,TDP2,BRCA2,PDX1,CENPJ,BRPF1,FANCA,CHD2,KAT6A,GRIP1,TCF4,DDX3X,PAX6,GDNF,EHMT1,BRCA1,KMT2A,WWOX
GO Process	GO:0044237	Cellular metabolic process	76	7513	0.27	6.02e-10	CDK13,CSNK2A1,PROC,MFN2,APC,HTRA2,HERC2,CREBBP,KANSL1,SETD1A,EP300,NOTCH3,NBN,TINF2,FANCM,SOD1,ATM,HNRNPU,KIT,FANCC,MITF,ALB,SHH,CDT1,KMT2D,TERT,FANCI,SMC1A,PPP2R1A,ZNF335,MRE11A,WT1,RAD51C,PTPN11,SMAD4,PRMT7,ATR,OCA2,RET,ERCC6,ACTB,NF1,VCP,TGFBR2,RTEL1,MTOR,OPA1,ADCK3,PSEN2,PARK2,DKC1,DNAJC6,PTEN,ATRX,HDAC8,AR,ASXL1,TDP2,FANCG,RAD50,BRCA2,PDX1,BRPF1,FANCA,KAT6A,DDX3X,FANCL,PAX6,GDNF,EHMT1,BRCA1,…
GO Process	GO:0009653	Anatomical structure morphogenesis	39	2165	0.52	6.57e-10	PHOX2B,MFN2,SIX3,CREBBP,EP300,NOTCH3,SOD1,ATM,FANCC,LRP5,SHH,ANKRD11,PROP1,TUBB3,ZNF335,FRAS1,NKX2-5,WT1,GATA4,PTPN11,SMAD4,MYH7,RET,ACTB,NF1,TGFBR2,MTOR,OPA1,SOX3,STIL,PTEN,ATRX,AR,ASXL1,PDX1,PAX6,GDNF,DNM1L,WWOX
GO Process	GO:0010638	Positive regulation of organelle organization	22	633	0.81	6.70e-10	MFN2,HTRA2,NBN,ATM,HNRNPU,LRP5,CDT1,MRE11A,SMAD4,ATR,CDK5RAP2,RTEL1,MTOR,OPA1,PARK2,DKC1,ATRX,RAD50,CENPJ,BRCA1,KMT2A,DNM1L
GO Process	GO:0009966	Regulation of signal transduction	47	3107	0.45	6.85e-10	CSNK2A1,MFN2,APC,HTRA2,SIX3,CREBBP,EP300,NOTCH3,NBN,SOD1,ATM,KIT,SHH,KMT2D,TERT,PPP2R1A,MRE11A,NKX2-5,GATA4,PTPN11,SMAD4,ATR,RET,ERCC6,NF1,VCP,TGFBR2,MTOR,OPA1,PARK2,ASPM,PTEN,AR,ASXL1,RAD50,PDX1,CENPJ,BRPF1,FANCA,KAT6A,DDX3X,GDNF,EHMT1,BRCA1,DNM1L,WWOX,GHR
GO Process	GO:0006357	Regulation of transcription by rna polymerase ii	39	2172	0.52	7.02e-10	CDK13,PHOX2B,SIX3,CREBBP,EP300,NOTCH3,ATM,HNRNPU,KIT,LRP5,MITF,SHH,KMT2D,TERT,PROP1,ZNF335,NKX2-5,WT1,GATA4,SMAD4,MCPH1,ERCC6,PARK2,SOX3,ATRX,HDAC8,AR,ASXL1,PDX1,CHD2,KAT6A,TCF4,DDX3X,PAX6,GDNF,EHMT1,BRCA1,KMT2A,WWOX
GO Process	GO:0065009	Regulation of molecular function	60	4913	0.35	8.45e-10	CSNK2A1,PHOX2B,APC,HTRA2,SIX3,HERC2,CREBBP,EP300,NBN,SOD1,HNRNPU,KIT,LRP5,MITF,SHH,CDT1,KMT2D,TERT,PROP1,PPP2R1A,ZNF335,MRE11A,NKX2-5,WT1,GATA4,PTPN11,SMAD4,MCPH1,PRMT7,RET,ERCC6,ACTB,NF1,VCP,TGFBR2,MTOR,PSEN2,PARK2,DKC1,SOX3,PTEN,HDAC8,AR,ASXL1,TDP2,RAD50,PDX1,CENPJ,FANCA,KAT6A,GRIP1,TCF4,DDX3X,PAX6,GDNF,BRCA1,KMT2A,DNM1L,WWOX,GHR
GO Process	GO:0006355	Regulation of transcription, dna-templated	49	3388	0.43	8.99e-10	CDK13,PHOX2B,SIX3,CREBBP,EP300,NOTCH3,ATM,HNRNPU,KIT,LRP5,MITF,SHH,CDT1,KMT2D,TERT,PROP1,PPP2R1A,ZNF335,NKX2-5,WT1,GATA4,SMAD4,MCPH1,CDK5RAP2,RET,ERCC6,MTOR,PARK2,SOX3,PTEN,ATRX,HDAC8,AR,ASXL1,BRCA2,PDX1,BRPF1,FANCA,CHD2,KAT6A,GRIP1,TCF4,DDX3X,PAX6,GDNF,EHMT1,BRCA1,KMT2A,WWOX
GO Process	GO:0051240	Positive regulation of multicellular organismal process	35	1770	0.56	9.23e-10	PHOX2B,MFN2,APC,CREBBP,EP300,SOD1,KIT,LRP5,SHH,TERT,ZNF335,MRE11A,NKX2-5,WT1,GATA4,PTPN11,SMAD4,RET,TGFBR2,MTOR,OPA1,PARK2,ASPM,PTEN,AR,GRIP1,TCF4,DDX3X,PAX6,GDNF,EHMT1,BRCA1,DNM1L,RPS19,GHR
GO Process	GO:0060284	Regulation of cell development	26	956	0.7	1.15e-09	PHOX2B,PROC,SIX3,EP300,NOTCH3,KIT,SHH,TERT,PPP2R1A,ZNF335,NKX2-5,SMAD4,CDK5RAP2,RET,NF1,MTOR,OPA1,PARK2,ASPM,SOX3,PTEN,GRIP1,TCF4,PAX6,DNM1L,RPS19
GO Process	GO:0048609	Multicellular organismal reproductive process	24	807	0.74	1.37e-09	HERC2,SOD1,ATM,KIT,FANCC,KMT2D,PPP2R1A,WT1,RAD51C,PTPN11,SMAD4,PRMT7,OCA2,MTOR,SYNE1,ASPM,PTEN,ATRX,AR,FANCG,BRCA2,FANCA,DDX3X,FANCL
GO Process	GO:2001233	Regulation of apoptotic signaling pathway	18	409	0.91	1.68e-09	CSNK2A1,HTRA2,SOD1,TERT,PPP2R1A,GATA4,RET,NF1,OPA1,PARK2,PTEN,AR,PDX1,DDX3X,GDNF,BRCA1,DNM1L,WWOX
GO Process	GO:0022402	Cell cycle process	26	976	0.69	1.73e-09	TUBGCP6,APC,EP300,NBN,FANCM,ATM,CDT1,SMC1A,PPP2R1A,MRE11A,RAD51C,MCPH1,CDK5RAP2,VCP,RTEL1,MTOR,ASPM,STIL,ATRX,HDAC8,RAD50,BRCA2,CENPJ,FANCA,PAX6,BRCA1
GO Process	GO:0050896	Response to stimulus	78	8046	0.25	1.75e-09	CDK13,CSNK2A1,PROKR2,PHOX2B,PROC,MFN2,APC,HTRA2,HERC2,CREBBP,EP300,NOTCH3,NBN,FANCM,SOD1,ATM,HNRNPU,KIT,FANCC,LRP5,MITF,ALB,SHH,SLC18A2,CDT1,KMT2D,TERT,FANCI,PROP1,TUBB3,SMC1A,PPP2R1A,MRE11A,WT1,GATA4,RAD51C,PTPN11,SMAD4,ATR,MYH7,RET,ERCC6,ACTB,NF1,VCP,TGFBR2,RTEL1,MICU1,MTOR,OPA1,PSEN2,PARK2,STIL,PTEN,ATRX,AR,ASXL1,TDP2,FANCG,RAD50,BRCA2,PDX1,CENPJ,FANCA,CHD2,KAT6A,GRIP1,DDX3X,FANCL,PAX6,GDNF,EH…
GO Process	GO:0007420	Brain development	23	745	0.76	1.83e-09	PHOX2B,HTRA2,SIX3,NOTCH3,ATM,FANCC,SHH,PROP1,ZNF335,PTPN11,MCPH1,CDK5RAP2,ACTB,NF1,TGFBR2,MTOR,ASPM,SOX3,STIL,PTEN,ATRX,BRCA2,PAX6
GO Process	GO:0007276	Gamete generation	22	673	0.78	1.85e-09	HERC2,SOD1,ATM,KIT,FANCC,KMT2D,PPP2R1A,WT1,RAD51C,SMAD4,PRMT7,OCA2,MTOR,SYNE1,ASPM,ATRX,AR,FANCG,BRCA2,FANCA,DDX3X,FANCL
GO Process	GO:0007346	Regulation of mitotic cell cycle	22	676	0.78	2.00e-09	CDK13,PHOX2B,APC,EP300,NBN,ATM,HNRNPU,LRP5,CDT1,TERT,PPP2R1A,MRE11A,RAD51C,PTPN11,MCPH1,CDK5RAP2,PTEN,ATRX,BRCA2,CENPJ,DDX3X,BRCA1
GO Process	GO:0007399	Nervous system development	40	2371	0.49	2.00e-09	PHOX2B,HTRA2,SIX3,EP300,NOTCH3,SOD1,ATM,KIT,FANCC,SHH,TERT,PROP1,TUBB3,ZNF335,NKX2-5,PTPN11,SMAD4,MCPH1,CDK5RAP2,RET,ERCC6,ACTB,NF1,TGFBR2,MTOR,OPA1,PARK2,ASPM,SOX3,STIL,PTEN,ATRX,TDP2,BRCA2,PDX1,GRIP1,TCF4,PAX6,GDNF,DNM1L
GO Process	GO:0007417	Central nervous system development	26	988	0.69	2.11e-09	PHOX2B,HTRA2,SIX3,NOTCH3,ATM,FANCC,SHH,PROP1,ZNF335,PTPN11,MCPH1,CDK5RAP2,ACTB,NF1,TGFBR2,MTOR,PARK2,ASPM,SOX3,STIL,PTEN,ATRX,BRCA2,PDX1,PAX6,GDNF
GO Process	GO:0043069	Negative regulation of programmed cell death	25	908	0.71	2.16e-09	CSNK2A1,PROC,HTRA2,SOD1,KIT,MITF,ALB,SHH,TERT,PROP1,MRE11A,NKX2-5,WT1,GATA4,MTOR,OPA1,PSEN2,PARK2,STIL,PTEN,AR,PDX1,DDX3X,GDNF,BRCA1
GO Process	GO:0051716	Cellular response to stimulus	69	6489	0.29	2.42e-09	CSNK2A1,PROKR2,PHOX2B,MFN2,APC,HTRA2,HERC2,CREBBP,EP300,NOTCH3,NBN,FANCM,SOD1,ATM,HNRNPU,KIT,FANCC,LRP5,MITF,ALB,SHH,TERT,FANCI,PROP1,TUBB3,SMC1A,PPP2R1A,MRE11A,WT1,GATA4,RAD51C,PTPN11,SMAD4,ATR,RET,ERCC6,ACTB,NF1,VCP,TGFBR2,RTEL1,MTOR,OPA1,PSEN2,PARK2,STIL,PTEN,ATRX,AR,TDP2,FANCG,RAD50,BRCA2,PDX1,CENPJ,FANCA,CHD2,KAT6A,GRIP1,DDX3X,FANCL,PAX6,GDNF,BRCA1,DNM1L,WWOX,RPS19,RECQL4,GHR
GO Process	GO:0008152	Metabolic process	79	8298	0.24	2.50e-09	CDK13,CSNK2A1,PROC,MFN2,APC,HTRA2,HERC2,CREBBP,KANSL1,SETD1A,EP300,NOTCH3,NBN,TINF2,FANCM,SOD1,ATM,HNRNPU,KIT,FANCC,LRP5,MITF,ALB,SHH,CDT1,KMT2D,TERT,FANCI,SMC1A,PPP2R1A,ZNF335,MRE11A,WT1,RAD51C,PTPN11,SMAD4,PRMT7,ATR,OCA2,MYH7,RET,ERCC6,ACTB,NF1,VCP,TGFBR2,RTEL1,MTOR,OPA1,ADCK3,PSEN2,PARK2,DKC1,DNAJC6,PTEN,ATRX,HDAC8,AR,ASXL1,TDP2,FANCG,RAD50,BRCA2,PDX1,BRPF1,FANCA,KAT6A,DDX3X,FANCL,PAX6,GDNF,EH…
GO Process	GO:0042127	Regulation of cell population proliferation	33	1642	0.57	2.56e-09	CDK13,CSNK2A1,PHOX2B,MFN2,APC,SIX3,NOTCH3,TINF2,ATM,HNRNPU,KIT,LRP5,MITF,SHH,KMT2D,TERT,ZNF335,NKX2-5,WT1,SMAD4,NF1,TGFBR2,MTOR,ASPM,PTEN,AR,BRCA2,PDX1,FANCA,FANCL,PAX6,GDNF,BRCA1
GO Process	GO:0060548	Negative regulation of cell death	26	999	0.68	2.56e-09	CSNK2A1,PROC,HTRA2,SOD1,KIT,MITF,ALB,SHH,TERT,PROP1,MRE11A,NKX2-5,WT1,GATA4,SMAD4,MTOR,OPA1,PSEN2,PARK2,STIL,PTEN,AR,PDX1,DDX3X,GDNF,BRCA1
GO Process	GO:0009987	Cellular process	105	15024	0.11	2.72e-09	CDK13,CSNK2A1,PROKR2,PHOX2B,PROC,MFN2,TUBGCP6,APC,HTRA2,SIX3,HERC2,CREBBP,KANSL1,SETD1A,EP300,NOTCH3,NBN,TINF2,FANCM,SOD1,ATM,HNRNPU,KIT,FANCC,ANO10,LRP5,MITF,ALB,SHH,SLC18A2,CDT1,KMT2D,TERT,FANCI,PROP1,TUBB3,SMC1A,PPP2R1A,ZNF335,MRE11A,FRAS1,NKX2-5,WT1,GATA4,RAD51C,PTPN11,SMAD4,MCPH1,PRMT7,ATR,CDK5RAP2,OCA2,MYH7,RET,ERCC6,ACTB,NF1,VCP,TGFBR2,RTEL1,SLC6A9,MICU1,MTOR,OPA1,ADCK3,PSEN2,PARK2,SYNE1,A…
GO Process	GO:0071704	Organic substance metabolic process	76	7755	0.26	2.86e-09	CDK13,CSNK2A1,PROC,APC,HTRA2,HERC2,CREBBP,KANSL1,SETD1A,EP300,NOTCH3,NBN,TINF2,FANCM,SOD1,ATM,HNRNPU,KIT,FANCC,LRP5,MITF,ALB,SHH,CDT1,KMT2D,TERT,FANCI,SMC1A,PPP2R1A,ZNF335,MRE11A,WT1,RAD51C,PTPN11,SMAD4,PRMT7,ATR,OCA2,RET,ERCC6,ACTB,NF1,VCP,TGFBR2,RTEL1,MTOR,OPA1,ADCK3,PSEN2,PARK2,DKC1,DNAJC6,PTEN,ATRX,HDAC8,AR,ASXL1,TDP2,FANCG,RAD50,BRCA2,PDX1,BRPF1,FANCA,KAT6A,DDX3X,FANCL,PAX6,GDNF,EHMT1,BRCA1,…
GO Process	GO:0031399	Regulation of protein modification process	35	1870	0.54	3.51e-09	APC,EP300,NBN,TINF2,FANCM,SOD1,ATM,KIT,LRP5,FANCI,PPP2R1A,ZNF335,MRE11A,GATA4,PTPN11,SMAD4,RET,ERCC6,ACTB,NF1,VCP,TGFBR2,MTOR,PARK2,PTEN,ATRX,HDAC8,AR,RAD50,DDX3X,PAX6,BRCA1,KMT2A,DNM1L,GHR
GO Process	GO:2001252	Positive regulation of chromosome organization	13	184	2023-12-01	5.16e-09	NBN,ATM,HNRNPU,CDT1,MRE11A,SMAD4,ATR,RTEL1,DKC1,ATRX,RAD50,BRCA1,KMT2A
GO Process	GO:0044238	Primary metabolic process	73	7332	0.26	6.83e-09	CDK13,CSNK2A1,PROC,APC,HTRA2,HERC2,CREBBP,KANSL1,SETD1A,EP300,NOTCH3,NBN,TINF2,FANCM,ATM,HNRNPU,KIT,FANCC,LRP5,MITF,ALB,SHH,KMT2D,TERT,FANCI,SMC1A,PPP2R1A,ZNF335,MRE11A,WT1,RAD51C,PTPN11,SMAD4,PRMT7,ATR,RET,ERCC6,ACTB,NF1,VCP,TGFBR2,RTEL1,MTOR,OPA1,ADCK3,PSEN2,PARK2,DKC1,DNAJC6,PTEN,ATRX,HDAC8,AR,ASXL1,TDP2,FANCG,RAD50,BRCA2,PDX1,BRPF1,FANCA,KAT6A,DDX3X,FANCL,PAX6,GDNF,EHMT1,BRCA1,EIF3F,KMT2A,RPS…
GO Process	GO:0019953	Sexual reproduction	23	810	0.72	8.14e-09	HERC2,SOD1,ATM,KIT,FANCC,KMT2D,PPP2R1A,WT1,RAD51C,SMAD4,PRMT7,OCA2,MTOR,SYNE1,ASPM,PTEN,ATRX,AR,FANCG,BRCA2,FANCA,DDX3X,FANCL
GO Process	GO:0051253	Negative regulation of rna metabolic process	30	1422	0.59	8.14e-09	SIX3,CREBBP,EP300,NOTCH3,HNRNPU,MITF,SHH,KMT2D,TERT,PROP1,NKX2-5,WT1,SMAD4,MCPH1,MTOR,PARK2,DKC1,SOX3,ATRX,HDAC8,AR,TDP2,PDX1,CENPJ,KAT6A,PAX6,GDNF,EHMT1,BRCA1,WWOX
GO Process	GO:0009890	Negative regulation of biosynthetic process	32	1624	0.56	8.65e-09	SIX3,CREBBP,EP300,NOTCH3,TINF2,SOD1,HNRNPU,MITF,SHH,SLC18A2,KMT2D,PROP1,NKX2-5,WT1,SMAD4,MCPH1,ATR,PARK2,SOX3,ATRX,HDAC8,AR,TDP2,BRCA2,PDX1,CENPJ,KAT6A,DDX3X,PAX6,EHMT1,BRCA1,WWOX
GO Process	GO:0043066	Negative regulation of apoptotic process	24	893	0.7	8.65e-09	CSNK2A1,PROC,HTRA2,SOD1,MITF,ALB,SHH,TERT,PROP1,MRE11A,NKX2-5,WT1,GATA4,MTOR,OPA1,PSEN2,PARK2,STIL,PTEN,AR,PDX1,DDX3X,GDNF,BRCA1
GO Process	GO:0010646	Regulation of cell communication	48	3514	0.4	1.03e-08	CSNK2A1,MFN2,APC,HTRA2,SIX3,CREBBP,EP300,NOTCH3,NBN,SOD1,ATM,KIT,LRP5,SHH,KMT2D,TERT,PPP2R1A,MRE11A,NKX2-5,GATA4,PTPN11,SMAD4,ATR,RET,ERCC6,NF1,VCP,TGFBR2,MTOR,OPA1,PARK2,ASPM,PTEN,AR,ASXL1,RAD50,PDX1,CENPJ,BRPF1,FANCA,KAT6A,DDX3X,GDNF,EHMT1,BRCA1,DNM1L,WWOX,GHR
GO Process	GO:0048585	Negative regulation of response to stimulus	32	1636	0.56	1.03e-08	CSNK2A1,PROC,MFN2,APC,HTRA2,SIX3,NOTCH3,SOD1,ATM,SHH,TERT,PPP2R1A,NKX2-5,GATA4,SMAD4,ERCC6,NF1,VCP,TGFBR2,RTEL1,MTOR,OPA1,PARK2,PTEN,AR,ASXL1,PDX1,DDX3X,GDNF,BRCA1,WWOX,RPS19
GO Process	GO:0045597	Positive regulation of cell differentiation	25	993	0.67	1.21e-08	PHOX2B,PROC,EP300,HNRNPU,KIT,LRP5,SHH,TERT,ZNF335,NKX2-5,GATA4,SMAD4,RET,TGFBR2,MTOR,OPA1,PARK2,ASPM,PTEN,AR,GRIP1,TCF4,PAX6,GDNF,DNM1L
GO Process	GO:0048699	Generation of neurons	31	1551	0.57	1.27e-08	PHOX2B,HTRA2,SIX3,EP300,NOTCH3,SOD1,KIT,SHH,TERT,TUBB3,ZNF335,NKX2-5,PTPN11,SMAD4,CDK5RAP2,RET,ERCC6,ACTB,NF1,MTOR,OPA1,PARK2,ASPM,SOX3,PTEN,TDP2,GRIP1,TCF4,PAX6,GDNF,DNM1L
GO Process	GO:0048732	Gland development	17	410	0.88	1.27e-08	SIX3,SOD1,ATM,LRP5,SHH,PROP1,NKX2-5,WT1,SMAD4,NF1,TGFBR2,SOX3,PTEN,AR,ASXL1,PDX1,PAX6
GO Process	GO:0023051	Regulation of signaling	48	3553	0.4	1.47e-08	CSNK2A1,MFN2,APC,HTRA2,SIX3,CREBBP,EP300,NOTCH3,NBN,SOD1,ATM,KIT,LRP5,SHH,KMT2D,TERT,PPP2R1A,MRE11A,NKX2-5,GATA4,PTPN11,SMAD4,ATR,RET,ERCC6,NF1,VCP,TGFBR2,MTOR,OPA1,PARK2,ASPM,PTEN,AR,ASXL1,RAD50,PDX1,CENPJ,BRPF1,FANCA,KAT6A,DDX3X,GDNF,EHMT1,BRCA1,DNM1L,WWOX,GHR
GO Process	GO:0006302	Double-strand break repair	13	204	2023-07-01	1.57e-08	HERC2,NBN,FANCM,ATM,MRE11A,RAD51C,ERCC6,VCP,TDP2,RAD50,BRCA2,BRCA1,RECQL4
GO Process	GO:0051052	Regulation of dna metabolic process	16	360	0.91	1.72e-08	NBN,TINF2,ATM,HNRNPU,CDT1,MRE11A,WT1,ATR,ERCC6,RTEL1,DKC1,ATRX,HDAC8,RAD50,BRCA1,KMT2A
GO Process	GO:0042592	Homeostatic process	32	1676	0.55	1.78e-08	CREBBP,NBN,TINF2,SOD1,ATM,KIT,FANCC,LRP5,ALB,ANKRD11,TERT,MRE11A,GATA4,RAD51C,PTPN11,SMAD4,ATR,ERCC6,ACTB,RTEL1,MICU1,OPA1,PARK2,DKC1,ASXL1,RAD50,BRCA2,PDX1,DDX3X,PAX6,RPS19,RECQL4
GO Process	GO:0050794	Regulation of cellular process	90	10932	0.18	1.81e-08	CDK13,CSNK2A1,PROKR2,PHOX2B,PROC,MFN2,APC,HTRA2,SIX3,CREBBP,SETD1A,EP300,NOTCH3,NBN,TINF2,FANCM,SOD1,ATM,HNRNPU,KIT,LRP5,MITF,ALB,SHH,SLC18A2,CDT1,KMT2D,TERT,FANCI,PROP1,TUBB3,PPP2R1A,ZNF335,MRE11A,NKX2-5,WT1,GATA4,RAD51C,PTPN11,SMAD4,MCPH1,ATR,CDK5RAP2,RET,ERCC6,ACTB,NF1,VCP,TGFBR2,RTEL1,MICU1,MTOR,OPA1,PSEN2,PARK2,ASPM,DKC1,SOX3,DNAJC6,STIL,PTEN,ATRX,HDAC8,AR,ASXL1,TDP2,RAD50,BRCA2,PDX1,CENPJ,S…
GO Process	GO:0007548	Sex differentiation	14	259	1.0	2.25e-08	SOD1,ATM,KIT,SHH,WT1,GATA4,PTPN11,SMAD4,ASPM,ATRX,AR,FANCG,BRCA2,FANCA
GO Process	GO:0050789	Regulation of biological process	92	11475	0.17	2.82e-08	CDK13,CSNK2A1,PROKR2,PHOX2B,PROC,MFN2,APC,HTRA2,SIX3,CREBBP,SETD1A,EP300,NOTCH3,NBN,TINF2,FANCM,SOD1,ATM,HNRNPU,KIT,LRP5,MITF,ALB,SHH,SLC18A2,CDT1,KMT2D,TERT,FANCI,PROP1,TUBB3,PPP2R1A,ZNF335,MRE11A,NKX2-5,WT1,GATA4,RAD51C,PTPN11,SMAD4,MCPH1,PRMT7,ATR,CDK5RAP2,MYH7,RET,ERCC6,ACTB,NF1,VCP,TGFBR2,RTEL1,MICU1,MTOR,OPA1,PSEN2,PARK2,ASPM,DKC1,SOX3,DNAJC6,STIL,PTEN,ATRX,HDAC8,AR,ASXL1,TDP2,RAD50,BRCA2,P…
GO Process	GO:0010647	Positive regulation of cell communication	33	1823	0.52	3.20e-08	CSNK2A1,HTRA2,CREBBP,EP300,SOD1,ATM,KIT,SHH,KMT2D,TERT,PPP2R1A,GATA4,PTPN11,SMAD4,ATR,RET,ERCC6,NF1,VCP,MTOR,OPA1,PARK2,ASPM,PTEN,AR,ASXL1,PDX1,CENPJ,DDX3X,GDNF,DNM1L,WWOX,GHR
GO Process	GO:0023056	Positive regulation of signaling	33	1831	0.52	3.55e-08	CSNK2A1,HTRA2,CREBBP,EP300,SOD1,ATM,KIT,SHH,KMT2D,TERT,PPP2R1A,GATA4,PTPN11,SMAD4,ATR,RET,ERCC6,NF1,VCP,MTOR,OPA1,PARK2,ASPM,PTEN,AR,ASXL1,PDX1,CENPJ,DDX3X,GDNF,DNM1L,WWOX,GHR
GO Process	GO:0051321	Meiotic cell cycle	13	220	2023-04-01	3.56e-08	TUBGCP6,NBN,FANCM,ATM,SMC1A,PPP2R1A,MRE11A,RAD51C,ASPM,ATRX,RAD50,BRCA2,FANCA
GO Process	GO:0002520	Immune system development	20	652	0.75	3.98e-08	CDK13,EP300,NBN,SOD1,ATM,KIT,LRP5,MITF,SHH,NKX2-5,PTPN11,RET,TGFBR2,MTOR,ASXL1,BRCA2,CHD2,KAT6A,KMT2A,RPS19
GO Process	GO:0009628	Response to abiotic stimulus	26	1147	0.62	3.98e-08	HTRA2,CREBBP,EP300,SOD1,ATM,KIT,LRP5,TERT,SMC1A,GATA4,PTPN11,SMAD4,ATR,ERCC6,NF1,VCP,TGFBR2,MTOR,OPA1,PSEN2,PTEN,FANCG,BRCA2,DDX3X,BRCA1,DNM1L
GO Process	GO:0044703	Multi-organism reproductive process	24	971	0.66	3.98e-08	HERC2,SOD1,ATM,KIT,FANCC,KMT2D,PPP2R1A,WT1,RAD51C,SMAD4,PRMT7,OCA2,TGFBR2,MTOR,SYNE1,ASPM,PTEN,ATRX,AR,FANCG,BRCA2,FANCA,DDX3X,FANCL
GO Process	GO:0010558	Negative regulation of macromolecule biosynthetic process	30	1534	0.56	4.18e-08	SIX3,CREBBP,EP300,NOTCH3,TINF2,HNRNPU,MITF,SHH,KMT2D,PROP1,NKX2-5,WT1,SMAD4,MCPH1,ATR,PARK2,SOX3,ATRX,HDAC8,AR,TDP2,BRCA2,PDX1,CENPJ,KAT6A,DDX3X,PAX6,EHMT1,BRCA1,WWOX
GO Process	GO:0043412	Macromolecule modification	45	3277	0.4	4.37e-08	CDK13,CSNK2A1,PROC,APC,HERC2,CREBBP,KANSL1,SETD1A,EP300,ATM,KIT,ALB,KMT2D,PPP2R1A,ZNF335,PTPN11,SMAD4,PRMT7,ATR,RET,ERCC6,ACTB,NF1,VCP,TGFBR2,MTOR,ADCK3,PARK2,DKC1,DNAJC6,PTEN,ATRX,HDAC8,AR,ASXL1,BRCA2,BRPF1,KAT6A,FANCL,GDNF,EHMT1,BRCA1,EIF3F,KMT2A,GHR
GO Process	GO:1901796	Regulation of signal transduction by p53 class mediator	12	182	2023-09-01	5.19e-08	CSNK2A1,EP300,NBN,ATM,MRE11A,ATR,PARK2,RAD50,BRPF1,KAT6A,EHMT1,BRCA1
GO Process	GO:0009967	Positive regulation of signal transduction	31	1654	0.54	5.37e-08	CSNK2A1,HTRA2,CREBBP,EP300,SOD1,ATM,KIT,SHH,KMT2D,TERT,PPP2R1A,GATA4,PTPN11,SMAD4,ATR,RET,ERCC6,NF1,VCP,MTOR,OPA1,PARK2,ASPM,PTEN,AR,ASXL1,CENPJ,DDX3X,DNM1L,WWOX,GHR
GO Process	GO:0032508	DNA duplex unwinding	10	106	1.24	5.86e-08	NBN,FANCM,MRE11A,ERCC6,RTEL1,ATRX,RAD50,CHD2,DDX3X,RECQL4
GO Process	GO:0050767	Regulation of neurogenesis	22	828	0.69	6.18e-08	PHOX2B,SIX3,EP300,NOTCH3,KIT,SHH,TERT,ZNF335,NKX2-5,CDK5RAP2,RET,NF1,MTOR,OPA1,PARK2,ASPM,SOX3,PTEN,GRIP1,TCF4,PAX6,DNM1L
GO Process	GO:0009968	Negative regulation of signal transduction	27	1271	0.59	6.44e-08	CSNK2A1,MFN2,APC,HTRA2,SIX3,NOTCH3,ATM,SHH,TERT,PPP2R1A,NKX2-5,GATA4,SMAD4,NF1,VCP,TGFBR2,MTOR,OPA1,PARK2,PTEN,AR,ASXL1,PDX1,DDX3X,GDNF,BRCA1,WWOX
GO Process	GO:0006464	Cellular protein modification process	43	3063	0.41	6.49e-08	CDK13,CSNK2A1,PROC,APC,HERC2,CREBBP,KANSL1,SETD1A,EP300,ATM,KIT,ALB,KMT2D,PPP2R1A,ZNF335,PTPN11,SMAD4,PRMT7,ATR,RET,ERCC6,ACTB,NF1,VCP,TGFBR2,MTOR,ADCK3,PARK2,DNAJC6,PTEN,HDAC8,AR,ASXL1,BRCA2,BRPF1,KAT6A,FANCL,GDNF,EHMT1,BRCA1,EIF3F,KMT2A,GHR
GO Process	GO:0032268	Regulation of cellular protein metabolic process	40	2693	0.44	6.73e-08	CSNK2A1,APC,HTRA2,EP300,NBN,TINF2,FANCM,SOD1,ATM,KIT,LRP5,SHH,FANCI,PPP2R1A,ZNF335,MRE11A,WT1,GATA4,PTPN11,SMAD4,RET,ERCC6,ACTB,NF1,VCP,TGFBR2,MTOR,PARK2,PTEN,ATRX,HDAC8,AR,RAD50,DDX3X,PAX6,BRCA1,EIF3F,KMT2A,DNM1L,GHR
GO Process	GO:0006915	Apoptotic process	23	918	0.67	6.96e-08	CSNK2A1,MFN2,HTRA2,SIX3,EP300,NBN,ATM,LRP5,SHH,PPP2R1A,NKX2-5,ERCC6,NF1,TGFBR2,MTOR,OPA1,PTEN,BRCA2,DDX3X,BRCA1,KMT2A,DNM1L,WWOX
GO Process	GO:0051246	Regulation of protein metabolic process	41	2828	0.43	7.54e-08	CSNK2A1,APC,HTRA2,EP300,NBN,TINF2,FANCM,SOD1,ATM,KIT,LRP5,SHH,FANCI,PPP2R1A,ZNF335,MRE11A,WT1,GATA4,PTPN11,SMAD4,RET,ERCC6,ACTB,NF1,VCP,TGFBR2,MTOR,PARK2,PTEN,ATRX,HDAC8,AR,RAD50,DDX3X,PAX6,BRCA1,EIF3F,KMT2A,DNM1L,GFAP,GHR
GO Process	GO:0010648	Negative regulation of cell communication	28	1382	0.57	7.86e-08	CSNK2A1,MFN2,APC,HTRA2,SIX3,NOTCH3,ATM,SHH,TERT,PPP2R1A,NKX2-5,GATA4,PTPN11,SMAD4,NF1,VCP,TGFBR2,MTOR,OPA1,PARK2,PTEN,AR,ASXL1,PDX1,DDX3X,GDNF,BRCA1,WWOX
GO Process	GO:0032206	Positive regulation of telomere maintenance	8	51	1.46	7.86e-08	NBN,ATM,MRE11A,ATR,RTEL1,DKC1,ATRX,RAD50
GO Process	GO:0023057	Negative regulation of signaling	28	1385	0.57	8.18e-08	CSNK2A1,MFN2,APC,HTRA2,SIX3,NOTCH3,ATM,SHH,TERT,PPP2R1A,NKX2-5,GATA4,PTPN11,SMAD4,NF1,VCP,TGFBR2,MTOR,OPA1,PARK2,PTEN,AR,ASXL1,PDX1,DDX3X,GDNF,BRCA1,WWOX
GO Process	GO:0051094	Positive regulation of developmental process	28	1389	0.57	8.66e-08	PHOX2B,PROC,EP300,HNRNPU,KIT,LRP5,SHH,TERT,ZNF335,NKX2-5,WT1,GATA4,SMAD4,RET,TGFBR2,MTOR,OPA1,PARK2,ASPM,PTEN,AR,GRIP1,TCF4,PAX6,GDNF,BRCA1,DNM1L,GHR
GO Process	GO:0031327	Negative regulation of cellular biosynthetic process	30	1592	0.54	8.92e-08	SIX3,CREBBP,EP300,NOTCH3,TINF2,HNRNPU,MITF,SHH,KMT2D,PROP1,NKX2-5,WT1,SMAD4,MCPH1,ATR,PARK2,SOX3,ATRX,HDAC8,AR,TDP2,BRCA2,PDX1,CENPJ,KAT6A,DDX3X,PAX6,EHMT1,BRCA1,WWOX
GO Process	GO:0016570	Histone modification	15	351	0.9	9.23e-08	CREBBP,KANSL1,SETD1A,EP300,ATM,KMT2D,ZNF335,PRMT7,HDAC8,ASXL1,BRCA2,BRPF1,KAT6A,EHMT1,KMT2A
GO Process	GO:0048534	Hematopoietic or lymphoid organ development	19	619	0.75	9.90e-08	CDK13,EP300,SOD1,ATM,KIT,LRP5,MITF,SHH,NKX2-5,PTPN11,RET,TGFBR2,MTOR,ASXL1,BRCA2,CHD2,KAT6A,KMT2A,RPS19
GO Process	GO:0048584	Positive regulation of response to stimulus	36	2257	0.47	9.92e-08	CSNK2A1,HTRA2,CREBBP,EP300,SOD1,ATM,KIT,SHH,KMT2D,TERT,PPP2R1A,GATA4,PTPN11,SMAD4,ATR,RET,ERCC6,ACTB,NF1,VCP,MTOR,OPA1,PARK2,ASPM,PTEN,AR,ASXL1,PDX1,CENPJ,DDX3X,BRCA1,KMT2A,DNM1L,WWOX,RPS19,GHR
GO Process	GO:0000278	Mitotic cell cycle	20	695	0.73	9.99e-08	TUBGCP6,APC,EP300,NBN,ATM,CDT1,TUBB3,SMC1A,PPP2R1A,MRE11A,PTPN11,MCPH1,CDK5RAP2,VCP,RTEL1,STIL,BRCA2,CENPJ,PAX6,BRCA1
GO Process	GO:0003006	Developmental process involved in reproduction	23	945	0.65	1.11e-07	HERC2,SOD1,ATM,KIT,FANCC,SHH,KMT2D,WT1,GATA4,RAD51C,PTPN11,SMAD4,OCA2,MTOR,SYNE1,ASPM,SOX3,PTEN,ATRX,AR,FANCG,BRCA2,FANCA
GO Process	GO:0070198	Protein localization to chromosome, telomeric region	6	16	1.84	1.13e-07	TINF2,ATM,TERT,ATR,ATRX,BRCA2
GO Process	GO:0006325	Chromatin organization	20	713	0.71	1.48e-07	CREBBP,KANSL1,SETD1A,EP300,ATM,HNRNPU,KMT2D,ZNF335,PRMT7,ERCC6,ACTB,ATRX,HDAC8,ASXL1,BRCA2,BRPF1,CHD2,KAT6A,EHMT1,KMT2A
GO Process	GO:0051129	Negative regulation of cellular component organization	20	713	0.71	1.48e-07	APC,HTRA2,EP300,NBN,TINF2,ATM,HNRNPU,SMAD4,CDK5RAP2,RTEL1,OPA1,PARK2,PTEN,ATRX,AR,RAD50,SACS,DDX3X,BRCA1,DNM1L
GO Process	GO:0044267	Cellular protein metabolic process	47	3696	0.37	1.56e-07	CDK13,CSNK2A1,PROC,APC,HTRA2,HERC2,CREBBP,KANSL1,SETD1A,EP300,ATM,KIT,ALB,KMT2D,PPP2R1A,ZNF335,PTPN11,SMAD4,PRMT7,ATR,RET,ERCC6,ACTB,NF1,VCP,TGFBR2,MTOR,ADCK3,PSEN2,PARK2,DNAJC6,PTEN,HDAC8,AR,ASXL1,BRCA2,BRPF1,KAT6A,DDX3X,FANCL,GDNF,EHMT1,BRCA1,EIF3F,KMT2A,RPS19,GHR
GO Process	GO:0006260	DNA replication	12	205	2023-03-01	1.57e-07	NBN,FANCM,ATM,CDT1,MRE11A,ATR,RTEL1,ATRX,RAD50,BRCA2,BRCA1,RECQL4
GO Process	GO:0008406	Gonad development	12	205	2023-03-01	1.57e-07	SOD1,ATM,KIT,WT1,GATA4,SMAD4,ASPM,ATRX,AR,FANCG,BRCA2,FANCA
GO Process	GO:0012501	Programmed cell death	24	1054	0.62	1.58e-07	CSNK2A1,MFN2,HTRA2,SIX3,EP300,NBN,ATM,KIT,LRP5,SHH,PPP2R1A,NKX2-5,ERCC6,NF1,TGFBR2,MTOR,OPA1,PTEN,BRCA2,DDX3X,BRCA1,KMT2A,DNM1L,WWOX
GO Process	GO:0035264	Multicellular organism growth	9	86	1.29	1.58e-07	EP300,ATM,ANKRD11,PTPN11,ERCC6,MTOR,STIL,ATRX,AR
GO Process	GO:2001236	Regulation of extrinsic apoptotic signaling pathway	11	161	2023-01-01	1.62e-07	HTRA2,TERT,PPP2R1A,RET,NF1,PTEN,AR,DDX3X,GDNF,BRCA1,WWOX
GO Process	GO:0045786	Negative regulation of cell cycle	18	571	0.76	1.73e-07	PHOX2B,APC,HTRA2,EP300,NBN,ATM,CDT1,MRE11A,PTPN11,MCPH1,ATR,CDK5RAP2,ERCC6,MTOR,PTEN,ATRX,EHMT1,BRCA1
GO Process	GO:0048285	Organelle fission	14	318	0.91	2.14e-07	FANCM,ATM,CDT1,SMC1A,PPP2R1A,MRE11A,RAD51C,OPA1,PARK2,ASPM,RAD50,BRCA2,FANCA,DNM1L
GO Process	GO:0051093	Negative regulation of developmental process	23	983	0.64	2.14e-07	CDK13,PHOX2B,SIX3,NOTCH3,HNRNPU,LRP5,SHH,TERT,NKX2-5,WT1,PTPN11,SMAD4,CDK5RAP2,NF1,TGFBR2,PARK2,ASPM,SOX3,PTEN,ASXL1,BRCA2,PAX6,DNM1L
GO Process	GO:0022607	Cellular component assembly	36	2359	0.45	2.90e-07	MFN2,TUBGCP6,APC,CREBBP,EP300,NBN,TINF2,KIT,FANCC,MITF,CDT1,KMT2D,TERT,SMC1A,PPP2R1A,NKX2-5,SMAD4,PRMT7,CDK5RAP2,ACTB,VCP,MICU1,OPA1,PARK2,ASPM,PTEN,ATRX,CENPJ,FANCA,KAT6A,TCF4,DDX3X,EIF3F,KMT2A,DNM1L,RPS19
GO Process	GO:1901987	Regulation of cell cycle phase transition	16	452	0.82	2.93e-07	PHOX2B,APC,SIX3,EP300,NBN,ATM,CDT1,TERT,PPP2R1A,MRE11A,RAD51C,CDK5RAP2,PTEN,CENPJ,DDX3X,BRCA1
GO Process	GO:0008284	Positive regulation of cell population proliferation	22	919	0.65	3.26e-07	CDK13,CSNK2A1,MFN2,NOTCH3,HNRNPU,KIT,LRP5,SHH,KMT2D,TERT,ZNF335,NKX2-5,SMAD4,NF1,TGFBR2,MTOR,ASPM,PTEN,AR,PDX1,PAX6,GDNF
GO Process	GO:0034645	Cellular macromolecule biosynthetic process	29	1592	0.53	3.37e-07	CDK13,CREBBP,NOTCH3,NBN,FANCM,ATM,MITF,CDT1,TERT,MRE11A,SMAD4,ATR,ERCC6,VCP,RTEL1,DKC1,PTEN,ATRX,AR,ASXL1,RAD50,BRCA2,PDX1,DDX3X,PAX6,BRCA1,EIF3F,RPS19,RECQL4
GO Process	GO:1902531	Regulation of intracellular signal transduction	31	1807	0.5	3.44e-07	CSNK2A1,MFN2,HTRA2,EP300,NBN,SOD1,ATM,KIT,PPP2R1A,MRE11A,GATA4,PTPN11,SMAD4,ATR,RET,ERCC6,NF1,MTOR,OPA1,PARK2,PTEN,AR,RAD50,PDX1,BRPF1,KAT6A,DDX3X,EHMT1,BRCA1,DNM1L,GHR
GO Process	GO:0010639	Negative regulation of organelle organization	15	395	0.85	3.69e-07	APC,HTRA2,NBN,TINF2,ATM,HNRNPU,SMAD4,CDK5RAP2,RTEL1,OPA1,PARK2,ATRX,RAD50,BRCA1,DNM1L
GO Process	GO:0007569	Cell aging	8	66	1.35	4.13e-07	SOD1,ATM,TERT,ATR,MTOR,OPA1,BRCA2,KAT6A
GO Process	GO:0072091	Regulation of stem cell proliferation	8	68	1.34	5.07e-07	SIX3,HNRNPU,SHH,TERT,ZNF335,NF1,ASPM,PAX6
GO Process	GO:0044093	Positive regulation of molecular function	31	1842	0.49	5.24e-07	HTRA2,EP300,NBN,SOD1,HNRNPU,KIT,LRP5,SHH,CDT1,TERT,MRE11A,PTPN11,RET,ERCC6,NF1,VCP,TGFBR2,MTOR,PSEN2,PARK2,DKC1,PTEN,AR,RAD50,PDX1,DDX3X,PAX6,GDNF,KMT2A,DNM1L,GHR
GO Process	GO:0051338	Regulation of transferase activity	23	1036	0.61	5.28e-07	APC,NBN,SOD1,HNRNPU,KIT,LRP5,PPP2R1A,MRE11A,PTPN11,MCPH1,RET,ERCC6,ACTB,NF1,TGFBR2,MTOR,PARK2,DKC1,PTEN,RAD50,DDX3X,DNM1L,GHR
GO Process	GO:0022412	Cellular process involved in reproduction in multicellular organism	14	345	0.87	5.39e-07	ATM,KIT,FANCC,KMT2D,PPP2R1A,WT1,RAD51C,PRMT7,OCA2,MTOR,ASPM,FANCG,BRCA2,FANCA
GO Process	GO:1903507	Negative regulation of nucleic acid-templated transcription	26	1324	0.56	5.50e-07	SIX3,CREBBP,EP300,NOTCH3,HNRNPU,MITF,SHH,KMT2D,PROP1,NKX2-5,WT1,SMAD4,MCPH1,PARK2,SOX3,ATRX,HDAC8,AR,TDP2,PDX1,CENPJ,KAT6A,PAX6,EHMT1,BRCA1,WWOX
GO Process	GO:0000724	Double-strand break repair via homologous recombination	9	102	1.21	5.65e-07	NBN,FANCM,ATM,MRE11A,RAD51C,RAD50,BRCA2,BRCA1,RECQL4
GO Process	GO:0050769	Positive regulation of neurogenesis	16	479	0.79	6.02e-07	PHOX2B,EP300,KIT,SHH,ZNF335,NKX2-5,RET,MTOR,OPA1,PARK2,ASPM,PTEN,GRIP1,TCF4,PAX6,DNM1L
GO Process	GO:1901990	Regulation of mitotic cell cycle phase transition	15	416	0.82	6.75e-07	PHOX2B,APC,EP300,NBN,ATM,CDT1,TERT,PPP2R1A,MRE11A,RAD51C,CDK5RAP2,PTEN,CENPJ,DDX3X,BRCA1
GO Process	GO:0010720	Positive regulation of cell development	17	556	0.75	6.91e-07	PHOX2B,PROC,EP300,KIT,SHH,ZNF335,NKX2-5,RET,MTOR,OPA1,PARK2,ASPM,PTEN,GRIP1,TCF4,PAX6,DNM1L
GO Process	GO:0048608	Reproductive structure development	15	420	0.82	7.56e-07	SOD1,ATM,KIT,SHH,WT1,GATA4,PTPN11,SMAD4,ASPM,PTEN,ATRX,AR,FANCG,BRCA2,FANCA
GO Process	GO:0044085	Cellular component biogenesis	37	2583	0.42	7.88e-07	MFN2,TUBGCP6,APC,CREBBP,EP300,NBN,TINF2,KIT,FANCC,MITF,CDT1,KMT2D,TERT,SMC1A,PPP2R1A,NKX2-5,SMAD4,PRMT7,CDK5RAP2,ACTB,VCP,MICU1,OPA1,PARK2,ASPM,DKC1,PTEN,ATRX,CENPJ,FANCA,KAT6A,TCF4,DDX3X,EIF3F,KMT2A,DNM1L,RPS19
GO Process	GO:0042221	Response to chemical	50	4333	0.33	7.98e-07	PROKR2,PHOX2B,MFN2,APC,HTRA2,CREBBP,EP300,NOTCH3,SOD1,ATM,HNRNPU,KIT,FANCC,LRP5,ALB,SHH,SLC18A2,CDT1,KMT2D,TERT,TUBB3,PPP2R1A,WT1,GATA4,PTPN11,SMAD4,ATR,RET,ERCC6,ACTB,VCP,TGFBR2,MTOR,OPA1,PARK2,PTEN,ATRX,AR,ASXL1,PDX1,GRIP1,DDX3X,PAX6,GDNF,EHMT1,BRCA1,DNM1L,WWOX,RPS19,GHR
GO Process	GO:2000113	Negative regulation of cellular macromolecule biosynthetic process	27	1470	0.53	1.00e-06	SIX3,CREBBP,EP300,NOTCH3,TINF2,HNRNPU,MITF,SHH,KMT2D,PROP1,NKX2-5,WT1,SMAD4,MCPH1,ATR,PARK2,ATRX,HDAC8,AR,BRCA2,PDX1,KAT6A,DDX3X,PAX6,EHMT1,BRCA1,WWOX
GO Process	GO:2001241	Positive regulation of extrinsic apoptotic signaling pathway in absence of ligand	5	11	1.92	1.06e-06	HTRA2,PPP2R1A,RET,NF1,WWOX
GO Process	GO:2001239	Regulation of extrinsic apoptotic signaling pathway in absence of ligand	7	48	1.43	1.08e-06	HTRA2,TERT,PPP2R1A,RET,NF1,GDNF,WWOX
GO Process	GO:0051054	Positive regulation of dna metabolic process	11	200	2023-01-01	1.16e-06	NBN,ATM,MRE11A,WT1,ATR,ERCC6,RTEL1,DKC1,ATRX,RAD50,BRCA1
GO Process	GO:0045664	Regulation of neuron differentiation	18	665	0.7	1.45e-06	PHOX2B,SIX3,EP300,NOTCH3,SHH,NKX2-5,CDK5RAP2,RET,MTOR,OPA1,PARK2,ASPM,SOX3,PTEN,GRIP1,TCF4,PAX6,DNM1L
GO Process	GO:0043549	Regulation of kinase activity	21	918	0.63	1.46e-06	APC,NBN,SOD1,HNRNPU,KIT,LRP5,PPP2R1A,MRE11A,PTPN11,MCPH1,RET,ERCC6,ACTB,NF1,TGFBR2,MTOR,PARK2,PTEN,RAD50,DDX3X,GHR
GO Process	GO:0007507	Heart development	16	522	0.75	1.79e-06	EP300,ATM,HNRNPU,SHH,NKX2-5,WT1,GATA4,PTPN11,SMAD4,MYH7,NF1,TGFBR2,MTOR,STIL,PTEN,ASXL1
GO Process	GO:0042325	Regulation of phosphorylation	28	1626	0.5	1.92e-06	APC,EP300,NBN,SOD1,ATM,HNRNPU,KIT,LRP5,PPP2R1A,MRE11A,GATA4,PTPN11,SMAD4,MCPH1,RET,ERCC6,ACTB,NF1,VCP,TGFBR2,MTOR,PARK2,PTEN,AR,RAD50,DDX3X,PAX6,GHR
GO Process	GO:0035270	Endocrine system development	9	120	1.14	1.93e-06	SIX3,SHH,PROP1,NKX2-5,WT1,NF1,SOX3,PDX1,PAX6
GO Process	GO:0030900	Forebrain development	14	387	0.82	1.95e-06	HTRA2,SIX3,NOTCH3,SHH,PROP1,ZNF335,MCPH1,NF1,ASPM,SOX3,STIL,PTEN,ATRX,PAX6
GO Process	GO:0045787	Positive regulation of cell cycle	14	388	0.82	2.00e-06	PHOX2B,EP300,ATM,HNRNPU,LRP5,CDT1,TERT,RAD51C,PTPN11,ATRX,BRCA2,CENPJ,DDX3X,BRCA1
GO Process	GO:0035295	Tube development	20	851	0.64	2.09e-06	EP300,NOTCH3,KIT,LRP5,SHH,NKX2-5,WT1,GATA4,SMAD4,RET,NF1,TGFBR2,STIL,PTEN,ATRX,AR,ASXL1,PDX1,PAX6,GDNF
GO Process	GO:1903046	Meiotic cell cycle process	10	165	2023-05-01	2.14e-06	FANCM,ATM,PPP2R1A,MRE11A,RAD51C,ASPM,ATRX,RAD50,BRCA2,FANCA
GO Process	GO:0043933	Protein-containing complex subunit organization	27	1539	0.51	2.42e-06	TUBGCP6,APC,CREBBP,EP300,FANCC,MITF,ALB,CDT1,KMT2D,TERT,PPP2R1A,SMAD4,PRMT7,VCP,MICU1,OPA1,PARK2,DNAJC6,ATRX,CENPJ,FANCA,KAT6A,TCF4,EIF3F,KMT2A,DNM1L,RPS19
GO Process	GO:0051641	Cellular localization	39	2967	0.38	2.61e-06	CDK13,PROC,MFN2,SIX3,HERC2,TINF2,SOD1,ATM,HNRNPU,KIT,ALB,SHH,SLC18A2,CDT1,TERT,PPP2R1A,MCPH1,ATR,CDK5RAP2,ACTB,NF1,VCP,SLC6A9,MTOR,OPA1,PSEN2,PARK2,SYNE1,ASPM,DNAJC6,STIL,ATRX,BRCA2,CENPJ,GRIP1,DDX3X,PAX6,DNM1L,RPS19
GO Process	GO:0007568	Aging	12	274	0.91	2.66e-06	HTRA2,SOD1,ATM,TERT,ATR,TGFBR2,MTOR,OPA1,PTEN,BRCA2,PDX1,KAT6A
GO Process	GO:0036297	Interstrand cross-link repair	7	56	1.36	2.67e-06	FANCM,FANCC,FANCI,ATR,FANCG,FANCA,FANCL
GO Process	GO:1903047	Mitotic cell cycle process	17	616	0.71	2.67e-06	APC,EP300,NBN,ATM,CDT1,SMC1A,PPP2R1A,MRE11A,MCPH1,CDK5RAP2,VCP,RTEL1,STIL,BRCA2,CENPJ,PAX6,BRCA1
GO Process	GO:0018193	Peptidyl-amino acid modification	20	867	0.63	2.73e-06	CSNK2A1,CREBBP,KANSL1,SETD1A,EP300,ATM,KIT,KMT2D,ZNF335,PRMT7,ATR,RET,TGFBR2,MTOR,BRCA2,BRPF1,KAT6A,EHMT1,KMT2A,GHR
GO Process	GO:1902692	Regulation of neuroblast proliferation	6	32	1.54	2.88e-06	SIX3,SHH,ZNF335,NF1,ASPM,PAX6
GO Process	GO:0072359	Circulatory system development	20	872	0.63	2.97e-06	EP300,NOTCH3,ATM,HNRNPU,LRP5,SHH,PROP1,NKX2-5,WT1,GATA4,PTPN11,SMAD4,MYH7,NF1,TGFBR2,MTOR,STIL,PTEN,ASXL1,PAX6
GO Process	GO:0014706	Striated muscle tissue development	12	280	0.9	3.24e-06	PHOX2B,EP300,HNRNPU,SHH,NKX2-5,WT1,GATA4,SMAD4,MYH7,NF1,MTOR,PTEN
GO Process	GO:0044087	Regulation of cellular component biogenesis	21	971	0.6	3.44e-06	APC,EP300,ATM,HNRNPU,KIT,CDT1,PTPN11,SMAD4,ATR,CDK5RAP2,VCP,RTEL1,MTOR,PARK2,STIL,PTEN,CENPJ,SACS,DDX3X,BRCA1,GFAP
GO Process	GO:0019538	Protein metabolic process	48	4251	0.32	3.59e-06	CDK13,CSNK2A1,PROC,APC,HTRA2,HERC2,CREBBP,KANSL1,SETD1A,EP300,ATM,KIT,ALB,SHH,KMT2D,PPP2R1A,ZNF335,PTPN11,SMAD4,PRMT7,ATR,RET,ERCC6,ACTB,NF1,VCP,TGFBR2,MTOR,ADCK3,PSEN2,PARK2,DNAJC6,PTEN,HDAC8,AR,ASXL1,BRCA2,BRPF1,KAT6A,DDX3X,FANCL,GDNF,EHMT1,BRCA1,EIF3F,KMT2A,RPS19,GHR
GO Process	GO:0097190	Apoptotic signaling pathway	12	286	0.89	4.00e-06	HTRA2,EP300,NBN,ATM,SHH,ERCC6,NF1,BRCA2,DDX3X,BRCA1,DNM1L,WWOX
GO Process	GO:0048729	Tissue morphogenesis	16	561	0.72	4.30e-06	SIX3,LRP5,SHH,FRAS1,NKX2-5,WT1,GATA4,SMAD4,MYH7,RET,ACTB,TGFBR2,STIL,AR,PDX1,GDNF
GO Process	GO:2001234	Negative regulation of apoptotic signaling pathway	11	232	0.94	4.41e-06	CSNK2A1,HTRA2,TERT,GATA4,OPA1,PARK2,AR,PDX1,DDX3X,GDNF,BRCA1
GO Process	GO:0007423	Sensory organ development	16	563	0.72	4.47e-06	PHOX2B,MFN2,SIX3,SOD1,KIT,LRP5,MITF,SHH,WT1,PTPN11,RET,NF1,TGFBR2,OPA1,SOX3,PAX6
GO Process	GO:0045596	Negative regulation of cell differentiation	18	728	0.66	4.91e-06	CDK13,PHOX2B,SIX3,NOTCH3,HNRNPU,LRP5,SHH,TERT,NKX2-5,PTPN11,SMAD4,CDK5RAP2,NF1,ASPM,SOX3,PTEN,ASXL1,PAX6
GO Process	GO:2001251	Negative regulation of chromosome organization	9	137	2023-08-01	5.13e-06	APC,NBN,TINF2,ATM,HNRNPU,RTEL1,ATRX,RAD50,BRCA1
GO Process	GO:0030097	Hemopoiesis	16	570	0.71	5.20e-06	CDK13,EP300,ATM,KIT,MITF,SHH,NKX2-5,PTPN11,TGFBR2,MTOR,ASXL1,BRCA2,CHD2,KAT6A,KMT2A,RPS19
GO Process	GO:0090068	Positive regulation of cell cycle process	12	294	0.88	5.20e-06	PHOX2B,EP300,ATM,HNRNPU,LRP5,CDT1,TERT,RAD51C,ATRX,CENPJ,DDX3X,BRCA1
GO Process	GO:0065003	Protein-containing complex assembly	24	1293	0.53	5.37e-06	TUBGCP6,APC,CREBBP,EP300,FANCC,MITF,CDT1,KMT2D,TERT,PPP2R1A,SMAD4,PRMT7,MICU1,OPA1,PARK2,ATRX,CENPJ,FANCA,KAT6A,TCF4,EIF3F,KMT2A,DNM1L,RPS19
GO Process	GO:0007389	Pattern specification process	14	432	0.78	6.44e-06	APC,SIX3,EP300,ATM,LRP5,SHH,PROP1,NKX2-5,WT1,GATA4,SMAD4,TGFBR2,STIL,PAX6
GO Process	GO:0033365	Protein localization to organelle	18	743	0.65	6.44e-06	MFN2,SIX3,TINF2,ATM,HNRNPU,SHH,TERT,MCPH1,ATR,PARK2,SYNE1,STIL,ATRX,BRCA2,DDX3X,PAX6,DNM1L,RPS19
GO Process	GO:0060429	Epithelium development	22	1109	0.56	6.56e-06	SIX3,EP300,SOD1,ATM,LRP5,SHH,FRAS1,NKX2-5,WT1,GATA4,SMAD4,RET,ACTB,NF1,TGFBR2,STIL,ATRX,AR,ASXL1,PDX1,PAX6,GDNF
GO Process	GO:0032205	Negative regulation of telomere maintenance	6	38	1.46	6.62e-06	NBN,TINF2,ATM,HNRNPU,RTEL1,RAD50
GO Process	GO:0002009	Morphogenesis of an epithelium	14	435	0.77	6.91e-06	LRP5,SHH,FRAS1,NKX2-5,WT1,GATA4,SMAD4,RET,ACTB,TGFBR2,STIL,AR,PDX1,GDNF
GO Process	GO:0007010	Cytoskeleton organization	22	1126	0.56	8.40e-06	TUBGCP6,SOD1,KIT,SHH,TUBB3,SMC1A,PPP2R1A,NKX2-5,MCPH1,CDK5RAP2,ACTB,NF1,VCP,SYNE1,ASPM,STIL,ATRX,BRCA2,CENPJ,PAX6,BRCA1,GFAP
GO Process	GO:0051983	Regulation of chromosome segregation	8	104	1.15	8.40e-06	CSNK2A1,APC,ATM,HNRNPU,CDT1,CDK5RAP2,ATRX,HDAC8
GO Process	GO:0009888	Tissue development	28	1760	0.47	8.55e-06	PHOX2B,SIX3,EP300,SOD1,ATM,HNRNPU,LRP5,SHH,TUBB3,FRAS1,NKX2-5,WT1,GATA4,SMAD4,MYH7,RET,ACTB,NF1,TGFBR2,MTOR,STIL,PTEN,ATRX,AR,ASXL1,PDX1,PAX6,GDNF
GO Process	GO:0000075	Cell cycle checkpoint	10	198	0.97	9.49e-06	APC,EP300,NBN,ATM,CDT1,MRE11A,PTPN11,ATR,ERCC6,BRCA1
GO Process	GO:0009719	Response to endogenous stimulus	25	1447	0.5	1.02e-05	PROKR2,PHOX2B,APC,EP300,SOD1,HNRNPU,KIT,LRP5,KMT2D,SMC1A,WT1,PTPN11,SMAD4,ACTB,TGFBR2,MTOR,OPA1,PARK2,PTEN,AR,PDX1,GRIP1,BRCA1,WWOX,GHR
GO Process	GO:0031570	DNA integrity checkpoint	9	151	2023-04-01	1.06e-05	EP300,NBN,ATM,CDT1,MRE11A,PTPN11,ATR,ERCC6,BRCA1
GO Process	GO:0097193	Intrinsic apoptotic signaling pathway	9	151	2023-04-01	1.06e-05	HTRA2,EP300,NBN,ATM,ERCC6,BRCA2,DDX3X,BRCA1,WWOX
GO Process	GO:0140013	Meiotic nuclear division	9	152	2023-04-01	1.11e-05	FANCM,ATM,PPP2R1A,MRE11A,RAD51C,ASPM,RAD50,BRCA2,FANCA
GO Process	GO:0031401	Positive regulation of protein modification process	23	1252	0.53	1.19e-05	NBN,FANCM,SOD1,ATM,KIT,FANCI,MRE11A,GATA4,PTPN11,SMAD4,RET,ERCC6,VCP,TGFBR2,MTOR,PARK2,PTEN,AR,RAD50,DDX3X,BRCA1,KMT2A,GHR
GO Process	GO:2000648	Positive regulation of stem cell proliferation	6	43	1.41	1.23e-05	HNRNPU,SHH,TERT,ZNF335,ASPM,PAX6
GO Process	GO:0070200	Establishment of protein localization to telomere	4	7	2023-02-02	1.27e-05	ATM,TERT,ATR,BRCA2
GO Process	GO:0006303	Double-strand break repair via nonhomologous end joining	7	74	1.24	1.34e-05	HERC2,NBN,ATM,MRE11A,ERCC6,RAD50,BRCA1
GO Process	GO:0045931	Positive regulation of mitotic cell cycle	9	156	2023-03-01	1.34e-05	PHOX2B,HNRNPU,LRP5,CDT1,TERT,RAD51C,PTPN11,BRCA2,DDX3X
GO Process	GO:0046661	Male sex differentiation	9	156	2023-03-01	1.34e-05	KIT,SHH,WT1,GATA4,SMAD4,ASPM,ATRX,AR,FANCA
GO Process	GO:0048863	Stem cell differentiation	9	156	2023-03-01	1.34e-05	PHOX2B,SIX3,KIT,SHH,SMAD4,RET,PDX1,CHD2,GDNF
GO Process	GO:0010948	Negative regulation of cell cycle process	12	328	0.83	1.47e-05	PHOX2B,APC,EP300,NBN,ATM,CDT1,MRE11A,CDK5RAP2,PTEN,ATRX,EHMT1,BRCA1
GO Process	GO:0070887	Cellular response to chemical stimulus	37	2919	0.37	1.47e-05	PROKR2,PHOX2B,APC,HTRA2,CREBBP,EP300,SOD1,ATM,HNRNPU,KIT,FANCC,ALB,SHH,TERT,WT1,GATA4,PTPN11,SMAD4,RET,ACTB,VCP,TGFBR2,MTOR,OPA1,PARK2,PTEN,ATRX,AR,GRIP1,DDX3X,PAX6,GDNF,BRCA1,DNM1L,WWOX,RPS19,GHR
GO Process	GO:0045892	Negative regulation of transcription, dna-templated	23	1273	0.52	1.53e-05	SIX3,CREBBP,EP300,NOTCH3,HNRNPU,MITF,SHH,KMT2D,PROP1,NKX2-5,WT1,SMAD4,MCPH1,PARK2,ATRX,HDAC8,AR,PDX1,KAT6A,PAX6,EHMT1,BRCA1,WWOX
GO Process	GO:0010721	Negative regulation of cell development	12	330	0.83	1.54e-05	PHOX2B,SIX3,NOTCH3,SHH,TERT,SMAD4,CDK5RAP2,NF1,ASPM,SOX3,PTEN,PAX6
GO Process	GO:0007059	Chromosome segregation	11	268	0.88	1.55e-05	FANCM,ATM,CDT1,SMC1A,PPP2R1A,MRE11A,RAD51C,CDK5RAP2,HDAC8,DDX3X,BRCA1
GO Process	GO:0000729	DNA double-strand break processing	5	23	2023-06-01	1.75e-05	NBN,ATM,MRE11A,RAD50,BRCA1
GO Process	GO:0000122	Negative regulation of transcription by rna polymerase ii	19	895	0.59	1.81e-05	CREBBP,EP300,NOTCH3,HNRNPU,MITF,SHH,PROP1,NKX2-5,WT1,SMAD4,MCPH1,PARK2,ATRX,HDAC8,AR,PDX1,PAX6,EHMT1,WWOX
GO Process	GO:0010942	Positive regulation of cell death	17	719	0.64	1.88e-05	MFN2,APC,HTRA2,SOD1,ATM,PPP2R1A,WT1,RET,NF1,VCP,MTOR,PSEN2,PTEN,PDX1,DDX3X,DNM1L,WWOX
GO Process	GO:0051179	Localization	55	5591	0.26	1.95e-05	CDK13,PHOX2B,PROC,MFN2,APC,SIX3,HERC2,TINF2,SOD1,ATM,HNRNPU,KIT,ANO10,LRP5,ALB,SHH,SLC18A2,CDT1,TERT,PROP1,PPP2R1A,FRAS1,PTPN11,MCPH1,ATR,CDK5RAP2,OCA2,RET,ACTB,NF1,VCP,TGFBR2,SLC6A9,MICU1,MTOR,OPA1,PSEN2,PARK2,SYNE1,ASPM,DKC1,DNAJC6,STIL,PTEN,ATRX,BRCA2,PDX1,CENPJ,GRIP1,DDX3X,PAX6,GDNF,DNM1L,RPS19,GHR
GO Process	GO:0043009	Chordate embryonic development	16	640	0.66	2.07e-05	MFN2,EP300,NBN,ATM,SHH,ANKRD11,ZNF335,NKX2-5,SMAD4,NF1,TGFBR2,STIL,AR,BRCA2,PAX6,BRCA1
GO Process	GO:0006310	DNA recombination	10	219	0.93	2.11e-05	NBN,FANCM,ATM,MRE11A,RAD51C,RTEL1,RAD50,BRCA2,BRCA1,RECQL4
GO Process	GO:0001666	Response to hypoxia	12	342	0.81	2.15e-05	CREBBP,EP300,ATM,TERT,SMAD4,NF1,TGFBR2,MTOR,OPA1,PSEN2,PTEN,DNM1L
GO Process	GO:0007017	Microtubule-based process	17	727	0.64	2.15e-05	TUBGCP6,SOD1,HNRNPU,TUBB3,SMC1A,PPP2R1A,MCPH1,CDK5RAP2,VCP,OPA1,ASPM,STIL,ATRX,BRCA2,CENPJ,PAX6,BRCA1
GO Process	GO:0016579	Protein deubiquitination	11	281	0.86	2.34e-05	APC,EP300,SMAD4,ACTB,VCP,PARK2,PTEN,AR,ASXL1,BRCA1,EIF3F
GO Process	GO:0033045	Regulation of sister chromatid segregation	7	83	1.19	2.56e-05	APC,ATM,HNRNPU,CDT1,CDK5RAP2,ATRX,HDAC8
GO Process	GO:0000226	Microtubule cytoskeleton organization	14	492	0.72	2.57e-05	TUBGCP6,TUBB3,SMC1A,PPP2R1A,MCPH1,CDK5RAP2,VCP,ASPM,STIL,ATRX,BRCA2,CENPJ,PAX6,BRCA1
GO Process	GO:0048598	Embryonic morphogenesis	15	571	0.69	2.62e-05	SIX3,CREBBP,SOD1,LRP5,SHH,FRAS1,NKX2-5,GATA4,SMAD4,RET,TGFBR2,STIL,PDX1,PAX6,GDNF
GO Process	GO:0080135	Regulation of cellular response to stress	17	739	0.63	2.62e-05	HTRA2,CREBBP,EP300,SOD1,ATM,TERT,GATA4,ATR,ERCC6,RTEL1,MICU1,MTOR,OPA1,PARK2,PTEN,PDX1,BRCA1
GO Process	GO:0001656	Metanephros development	7	84	1.19	2.73e-05	SHH,FRAS1,WT1,SMAD4,RET,NF1,GDNF
GO Process	GO:0032879	Regulation of localization	35	2740	0.37	2.75e-05	APC,HTRA2,SOD1,ATM,HNRNPU,KIT,LRP5,MITF,SHH,CDT1,TERT,NKX2-5,GATA4,PTPN11,SMAD4,RET,ACTB,NF1,TGFBR2,MTOR,PSEN2,PARK2,DKC1,DNAJC6,PTEN,HDAC8,AR,ASXL1,PDX1,CENPJ,PAX6,GDNF,KMT2A,DNM1L,RPS19
GO Process	GO:0044249	Cellular biosynthetic process	34	2611	0.38	2.75e-05	CDK13,CSNK2A1,CREBBP,NOTCH3,NBN,FANCM,SOD1,ATM,MITF,CDT1,TERT,MRE11A,SMAD4,ATR,OCA2,ERCC6,VCP,RTEL1,MTOR,ADCK3,DKC1,PTEN,ATRX,AR,ASXL1,RAD50,BRCA2,PDX1,DDX3X,PAX6,BRCA1,EIF3F,RPS19,RECQL4
GO Process	GO:2001238	Positive regulation of extrinsic apoptotic signaling pathway	6	51	1.34	2.76e-05	HTRA2,PPP2R1A,RET,NF1,PTEN,WWOX
GO Process	GO:0050768	Negative regulation of neurogenesis	11	287	0.85	2.78e-05	PHOX2B,SIX3,NOTCH3,SHH,TERT,CDK5RAP2,NF1,ASPM,SOX3,PTEN,PAX6
GO Process	GO:0051053	Negative regulation of dna metabolic process	8	126	2023-07-01	2.88e-05	NBN,TINF2,ATM,HNRNPU,ERCC6,RTEL1,RAD50,KMT2A
GO Process	GO:0010033	Response to organic substance	37	3011	0.36	2.90e-05	PROKR2,PHOX2B,MFN2,APC,HTRA2,EP300,SOD1,ATM,HNRNPU,KIT,LRP5,SLC18A2,CDT1,KMT2D,PPP2R1A,WT1,GATA4,PTPN11,SMAD4,RET,ACTB,VCP,TGFBR2,MTOR,OPA1,PARK2,PTEN,ATRX,AR,ASXL1,PDX1,GRIP1,PAX6,BRCA1,DNM1L,WWOX,GHR
GO Process	GO:0000280	Nuclear division	11	291	0.84	3.11e-05	FANCM,ATM,CDT1,SMC1A,PPP2R1A,MRE11A,RAD51C,ASPM,RAD50,BRCA2,FANCA
GO Process	GO:0009314	Response to radiation	13	431	0.75	3.43e-05	CREBBP,EP300,ATM,KIT,LRP5,SMC1A,ATR,ERCC6,NF1,MTOR,FANCG,BRCA2,BRCA1
GO Process	GO:0001932	Regulation of protein phosphorylation	24	1459	0.48	3.85e-05	APC,NBN,SOD1,ATM,KIT,LRP5,PPP2R1A,MRE11A,GATA4,PTPN11,SMAD4,RET,ERCC6,ACTB,NF1,TGFBR2,MTOR,PARK2,PTEN,AR,RAD50,DDX3X,PAX6,GHR
GO Process	GO:0018205	Peptidyl-lysine modification	11	299	0.83	3.97e-05	CREBBP,KANSL1,SETD1A,EP300,KMT2D,ZNF335,BRCA2,BRPF1,KAT6A,EHMT1,KMT2A
GO Process	GO:0008584	Male gonad development	8	133	2023-05-01	4.11e-05	KIT,WT1,GATA4,SMAD4,ASPM,ATRX,AR,FANCA
GO Process	GO:0008585	Female gonad development	7	91	1.15	4.29e-05	SOD1,ATM,KIT,SMAD4,FANCG,BRCA2,FANCA
GO Process	GO:0051640	Organelle localization	15	598	0.67	4.31e-05	MFN2,ATM,KIT,ALB,CDT1,PPP2R1A,MCPH1,CDK5RAP2,MTOR,OPA1,PSEN2,ASPM,CENPJ,PAX6,DNM1L
GO Process	GO:0030111	Regulation of wnt signaling pathway	12	370	0.78	4.39e-05	CSNK2A1,APC,SIX3,SHH,TERT,PPP2R1A,NKX2-5,VCP,PARK2,ASPM,DDX3X,WWOX
GO Process	GO:0048880	Sensory system development	12	371	0.78	4.50e-05	PHOX2B,MFN2,SIX3,LRP5,MITF,SHH,WT1,RET,NF1,TGFBR2,OPA1,PAX6
GO Process	GO:1903320	Regulation of protein modification by small protein conjugation or removal	10	242	0.88	4.56e-05	FANCM,FANCI,VCP,MTOR,PARK2,PTEN,HDAC8,DDX3X,BRCA1,DNM1L
GO Process	GO:0016571	Histone methylation	7	93	1.14	4.83e-05	CREBBP,SETD1A,KMT2D,ZNF335,PRMT7,EHMT1,KMT2A
GO Process	GO:0060562	Epithelial tube morphogenesis	11	307	0.82	4.94e-05	LRP5,SHH,NKX2-5,WT1,GATA4,SMAD4,RET,TGFBR2,STIL,AR,GDNF
GO Process	GO:0032990	Cell part morphogenesis	14	525	0.69	4.98e-05	PHOX2B,NOTCH3,SHH,TUBB3,ZNF335,PTPN11,SMAD4,RET,ACTB,OPA1,PTEN,PAX6,GDNF,DNM1L
GO Process	GO:0051247	Positive regulation of protein metabolic process	26	1715	0.45	5.34e-05	CSNK2A1,APC,HTRA2,NBN,FANCM,SOD1,ATM,KIT,FANCI,MRE11A,GATA4,PTPN11,SMAD4,RET,ERCC6,VCP,TGFBR2,MTOR,PARK2,PTEN,AR,RAD50,DDX3X,BRCA1,KMT2A,GHR
GO Process	GO:0008285	Negative regulation of cell population proliferation	16	696	0.63	5.41e-05	PHOX2B,MFN2,APC,TINF2,ATM,SHH,TERT,WT1,SMAD4,NF1,TGFBR2,PTEN,AR,BRCA2,PDX1,PAX6
GO Process	GO:0045165	Cell fate commitment	10	248	0.87	5.52e-05	APC,NOTCH3,MITF,SHH,NKX2-5,WT1,GATA4,SMAD4,MTOR,PAX6
GO Process	GO:0000077	DNA damage checkpoint	8	140	2023-02-01	5.66e-05	EP300,NBN,ATM,MRE11A,PTPN11,ATR,ERCC6,BRCA1
GO Process	GO:0032989	Cellular component morphogenesis	15	614	0.65	5.71e-05	PHOX2B,NOTCH3,SHH,TUBB3,ZNF335,NKX2-5,PTPN11,SMAD4,RET,ACTB,OPA1,PTEN,PAX6,GDNF,DNM1L
GO Process	GO:0035265	Organ growth	7	96	1.13	5.73e-05	SHH,NKX2-5,GATA4,PTPN11,TGFBR2,PTEN,AR
GO Process	GO:0071495	Cellular response to endogenous stimulus	21	1181	0.52	5.93e-05	PROKR2,PHOX2B,APC,SOD1,HNRNPU,KIT,SMC1A,WT1,PTPN11,SMAD4,ACTB,TGFBR2,MTOR,OPA1,PARK2,PTEN,AR,GRIP1,BRCA1,WWOX,GHR
GO Process	GO:0001655	Urogenital system development	11	315	0.81	6.06e-05	NOTCH3,SHH,FRAS1,WT1,SMAD4,RET,NF1,PTEN,AR,ASXL1,GDNF
GO Process	GO:0031297	Replication fork processing	5	32	1.46	6.32e-05	FANCM,MRE11A,RTEL1,ATRX,BRCA2
GO Process	GO:0048854	Brain morphogenesis	5	32	1.46	6.32e-05	FANCC,PROP1,ZNF335,NF1,PTEN
GO Process	GO:0043010	Camera-type eye development	11	318	0.81	6.56e-05	MFN2,SIX3,LRP5,MITF,SHH,WT1,RET,NF1,TGFBR2,OPA1,PAX6
GO Process	GO:0048232	Male gamete generation	14	543	0.68	6.98e-05	HERC2,SOD1,ATM,KIT,RAD51C,SMAD4,OCA2,SYNE1,ASPM,ATRX,AR,FANCG,BRCA2,FANCA
GO Process	GO:0007281	Germ cell development	10	256	0.86	6.99e-05	ATM,KIT,FANCC,KMT2D,WT1,OCA2,MTOR,ASPM,FANCG,BRCA2
GO Process	GO:0007051	Spindle organization	8	145	2023-01-01	7.00e-05	TUBGCP6,SMC1A,PPP2R1A,VCP,ASPM,STIL,ATRX,CENPJ
GO Process	GO:0010389	Regulation of g2/m transition of mitotic cell cycle	9	198	0.92	7.15e-05	PHOX2B,NBN,ATM,PPP2R1A,MRE11A,RAD51C,CDK5RAP2,CENPJ,BRCA1
GO Process	GO:1904356	Regulation of telomere maintenance via telomere lengthening	6	64	1.24	8.29e-05	TINF2,ATM,HNRNPU,ATR,RTEL1,DKC1
GO Process	GO:0071103	DNA conformation change	11	328	0.79	8.57e-05	NBN,FANCM,MRE11A,ERCC6,RTEL1,ATRX,RAD50,CHD2,KAT6A,DDX3X,RECQL4
GO Process	GO:0000902	Cell morphogenesis	16	726	0.61	8.67e-05	PHOX2B,EP300,NOTCH3,SOD1,SHH,TUBB3,ZNF335,PTPN11,SMAD4,RET,ACTB,PTEN,AR,ASXL1,PAX6,GDNF
GO Process	GO:0003002	Regionalization	11	332	0.79	9.50e-05	SIX3,EP300,ATM,LRP5,SHH,PROP1,NKX2-5,WT1,GATA4,SMAD4,PAX6
GO Process	GO:0010629	Negative regulation of gene expression	28	2014	0.41	9.50e-05	SIX3,CREBBP,EP300,NOTCH3,ATM,HNRNPU,MITF,SHH,KMT2D,TERT,PROP1,PPP2R1A,NKX2-5,WT1,SMAD4,MCPH1,PARK2,ATRX,HDAC8,AR,PDX1,KAT6A,DDX3X,PAX6,EHMT1,BRCA1,WWOX,RPS19
GO Process	GO:0016573	Histone acetylation	7	105	2023-09-01	9.50e-05	CREBBP,KANSL1,EP300,BRCA2,BRPF1,KAT6A,KMT2A
GO Process	GO:0061061	Muscle structure development	13	479	0.7	9.50e-05	PHOX2B,EP300,HNRNPU,SHH,NKX2-5,WT1,GATA4,SMAD4,MYH7,NF1,MTOR,SYNE1,CHD2
GO Process	GO:0048666	Neuron development	17	827	0.58	0.00010	PHOX2B,HTRA2,NOTCH3,SOD1,SHH,TUBB3,ZNF335,PTPN11,SMAD4,RET,ERCC6,ACTB,PTEN,TDP2,GRIP1,PAX6,GDNF
GO Process	GO:0120036	Plasma membrane bounded cell projection organization	20	1122	0.52	0.00010	PHOX2B,NOTCH3,SOD1,KIT,SHH,TUBB3,PPP2R1A,ZNF335,PTPN11,SMAD4,CDK5RAP2,RET,ERCC6,ACTB,MTOR,PTEN,CENPJ,GRIP1,PAX6,GDNF
GO Process	GO:0000904	Cell morphogenesis involved in differentiation	14	566	0.66	0.00011	PHOX2B,EP300,NOTCH3,SOD1,SHH,TUBB3,PTPN11,SMAD4,RET,ACTB,PTEN,AR,PAX6,GDNF
GO Process	GO:0048511	Rhythmic process	10	271	0.83	0.00011	CSNK2A1,PROKR2,SIX3,CREBBP,EP300,HNRNPU,MTOR,PTEN,KMT2A,DNM1L
GO Process	GO:0051241	Negative regulation of multicellular organismal process	21	1231	0.5	0.00011	PHOX2B,PROC,SIX3,NOTCH3,SOD1,LRP5,SHH,TERT,WT1,PTPN11,SMAD4,CDK5RAP2,NF1,TGFBR2,MTOR,ASPM,SOX3,PTEN,BRCA2,PAX6,RPS19
GO Process	GO:0070192	Chromosome organization involved in meiotic cell cycle	6	68	1.21	0.00011	ATM,PPP2R1A,MRE11A,RAD51C,ATRX,RAD50
GO Process	GO:1901700	Response to oxygen-containing compound	24	1567	0.45	0.00011	APC,HTRA2,SOD1,ATM,FANCC,LRP5,CDT1,WT1,GATA4,RET,ERCC6,ACTB,VCP,TGFBR2,MTOR,OPA1,PARK2,PTEN,AR,ASXL1,PDX1,BRCA1,DNM1L,GHR
GO Process	GO:0009952	Anterior/posterior pattern specification	9	214	0.89	0.00012	SIX3,EP300,ATM,LRP5,SHH,WT1,GATA4,SMAD4,PAX6
GO Process	GO:0031396	Regulation of protein ubiquitination	9	212	0.89	0.00012	FANCM,FANCI,MTOR,PARK2,PTEN,HDAC8,DDX3X,BRCA1,DNM1L
GO Process	GO:0043065	Positive regulation of apoptotic process	15	660	0.62	0.00012	MFN2,APC,HTRA2,SOD1,ATM,PPP2R1A,WT1,RET,NF1,VCP,PSEN2,PTEN,DDX3X,DNM1L,WWOX
GO Process	GO:0060485	Mesenchyme development	9	212	0.89	0.00012	PHOX2B,SHH,NKX2-5,WT1,GATA4,SMAD4,RET,TGFBR2,GDNF
GO Process	GO:0008630	Intrinsic apoptotic signaling pathway in response to dna damage	6	71	1.19	0.00013	HTRA2,EP300,ATM,ERCC6,BRCA2,BRCA1
GO Process	GO:0009725	Response to hormone	17	849	0.57	0.00013	PROKR2,APC,EP300,HNRNPU,KIT,LRP5,KMT2D,WT1,PTPN11,TGFBR2,MTOR,PTEN,AR,PDX1,GRIP1,BRCA1,GHR
GO Process	GO:0033047	Regulation of mitotic sister chromatid segregation	6	71	1.19	0.00013	APC,ATM,HNRNPU,CDT1,CDK5RAP2,ATRX
GO Process	GO:0048738	Cardiac muscle tissue development	8	160	0.97	0.00013	HNRNPU,NKX2-5,WT1,GATA4,SMAD4,MYH7,MTOR,PTEN
GO Process	GO:0007088	Regulation of mitotic nuclear division	8	162	0.96	0.00014	CDK13,APC,ATM,HNRNPU,LRP5,CDT1,CDK5RAP2,ATRX
GO Process	GO:0007224	Smoothened signaling pathway	6	72	1.19	0.00014	SHH,TGFBR2,STIL,PDX1,CENPJ,PAX6
GO Process	GO:0045665	Negative regulation of neuron differentiation	9	222	0.87	0.00016	PHOX2B,SIX3,NOTCH3,SHH,CDK5RAP2,ASPM,SOX3,PTEN,PAX6
GO Process	GO:0031175	Neuron projection development	15	680	0.61	0.00017	PHOX2B,NOTCH3,SOD1,SHH,TUBB3,ZNF335,PTPN11,SMAD4,RET,ERCC6,ACTB,PTEN,GRIP1,PAX6,GDNF
GO Process	GO:0031860	Telomeric 3 overhang formation	3	4	2.14	0.00018	NBN,MRE11A,RAD50
GO Process	GO:1901576	Organic substance biosynthetic process	33	2734	0.35	0.00018	CDK13,CSNK2A1,CREBBP,NOTCH3,NBN,FANCM,ATM,MITF,CDT1,TERT,MRE11A,SMAD4,ATR,OCA2,ERCC6,VCP,RTEL1,MTOR,ADCK3,DKC1,PTEN,ATRX,AR,ASXL1,RAD50,BRCA2,PDX1,DDX3X,PAX6,BRCA1,EIF3F,RPS19,RECQL4
GO Process	GO:0006261	DNA-dependent DNA replication	7	119	2023-04-01	0.00019	FANCM,CDT1,MRE11A,RTEL1,ATRX,BRCA2,RECQL4
GO Process	GO:0007062	Sister chromatid cohesion	5	42	1.34	0.00019	SMC1A,PPP2R1A,MRE11A,RAD51C,HDAC8
GO Process	GO:2000736	Regulation of stem cell differentiation	7	119	2023-04-01	0.00019	CDK13,SETD1A,HNRNPU,NKX2-5,GATA4,GDNF,KMT2A
GO Process	GO:0001667	Ameboidal-type cell migration	8	173	0.93	0.00021	PHOX2B,KIT,LRP5,SHH,PTPN11,RET,PTEN,GDNF
GO Process	GO:0048646	Anatomical structure formation involved in morphogenesis	17	883	0.55	0.00021	MFN2,EP300,NOTCH3,ATM,SHH,NKX2-5,WT1,GATA4,PTPN11,SMAD4,RET,TGFBR2,STIL,PTEN,AR,PAX6,GDNF
GO Process	GO:0071900	Regulation of protein serine/threonine kinase activity	13	521	0.66	0.00021	APC,SOD1,KIT,LRP5,PPP2R1A,PTPN11,RET,ERCC6,ACTB,NF1,PTEN,DDX3X,GHR
GO Process	GO:1901564	Organonitrogen compound metabolic process	50	5244	0.25	0.00021	CDK13,CSNK2A1,PROC,APC,HTRA2,HERC2,CREBBP,KANSL1,SETD1A,EP300,SOD1,ATM,KIT,ALB,SHH,KMT2D,PPP2R1A,ZNF335,PTPN11,SMAD4,PRMT7,ATR,RET,ERCC6,ACTB,NF1,VCP,TGFBR2,MTOR,OPA1,ADCK3,PSEN2,PARK2,DNAJC6,PTEN,HDAC8,AR,ASXL1,BRCA2,BRPF1,KAT6A,DDX3X,FANCL,GDNF,EHMT1,BRCA1,EIF3F,KMT2A,RPS19,GHR
GO Process	GO:0018027	Peptidyl-lysine dimethylation	4	19	1.59	0.00022	SETD1A,KMT2D,EHMT1,KMT2A
GO Process	GO:0032270	Positive regulation of cellular protein metabolic process	24	1635	0.43	0.00022	HTRA2,NBN,FANCM,SOD1,ATM,KIT,FANCI,MRE11A,GATA4,PTPN11,SMAD4,RET,ERCC6,VCP,TGFBR2,MTOR,PARK2,PTEN,AR,RAD50,DDX3X,BRCA1,KMT2A,GHR
GO Process	GO:0048667	Cell morphogenesis involved in neuron differentiation	12	445	0.7	0.00022	PHOX2B,NOTCH3,SOD1,SHH,TUBB3,PTPN11,SMAD4,RET,ACTB,PTEN,PAX6,GDNF
GO Process	GO:0072331	Signal transduction by p53 class mediator	7	123	2023-02-01	0.00023	EP300,NBN,ATM,ATRX,BRCA2,BRCA1,WWOX
GO Process	GO:0009611	Response to wounding	13	532	0.65	0.00025	PROC,MFN2,SOD1,SHH,GATA4,RAD51C,PTPN11,ACTB,NF1,TGFBR2,MTOR,PDX1,PAX6
GO Process	GO:0080182	Histone h3-k4 trimethylation	4	20	1.57	0.00026	SETD1A,KMT2D,ZNF335,KMT2A
GO Process	GO:0030330	DNA damage response, signal transduction by p53 class mediator	6	82	1.13	0.00027	EP300,NBN,ATM,ATRX,BRCA2,BRCA1
GO Process	GO:0045666	Positive regulation of neuron differentiation	11	377	0.73	0.00027	PHOX2B,EP300,NKX2-5,RET,MTOR,OPA1,PARK2,PTEN,GRIP1,TCF4,DNM1L
GO Process	GO:2001235	Positive regulation of apoptotic signaling pathway	8	180	0.91	0.00027	HTRA2,SOD1,PPP2R1A,RET,NF1,PTEN,DNM1L,WWOX
GO Process	GO:0014042	Positive regulation of neuron maturation	3	5	2023-04-02	0.00028	RET,MTOR,OPA1
GO Process	GO:0045930	Negative regulation of mitotic cell cycle	10	308	0.78	0.00029	APC,EP300,NBN,ATM,CDT1,MRE11A,MCPH1,PTEN,ATRX,BRCA1
GO Process	GO:0080134	Regulation of response to stress	22	1437	0.45	0.00029	PROC,HTRA2,CREBBP,EP300,SOD1,ATM,TERT,GATA4,PTPN11,MCPH1,ATR,ERCC6,RTEL1,MICU1,MTOR,OPA1,PARK2,PTEN,PDX1,FANCA,BRCA1,RPS19
GO Process	GO:0060993	Kidney morphogenesis	6	84	2023-12-01	0.00030	SHH,FRAS1,WT1,SMAD4,ASXL1,GDNF
GO Process	GO:0007154	Cell communication	50	5320	0.24	0.00031	CSNK2A1,PROKR2,APC,HTRA2,CREBBP,EP300,NOTCH3,NBN,SOD1,ATM,KIT,LRP5,MITF,ALB,SHH,SLC18A2,PROP1,TUBB3,PPP2R1A,FRAS1,GATA4,PTPN11,SMAD4,RET,ERCC6,ACTB,NF1,VCP,TGFBR2,SLC6A9,MTOR,PSEN2,PARK2,STIL,PTEN,ATRX,AR,TDP2,BRCA2,PDX1,CENPJ,GRIP1,DDX3X,PAX6,GDNF,BRCA1,DNM1L,WWOX,RPS19,GHR
GO Process	GO:0007409	Axonogenesis	11	384	0.72	0.00031	PHOX2B,NOTCH3,SHH,TUBB3,PTPN11,SMAD4,RET,ACTB,PTEN,PAX6,GDNF
GO Process	GO:0048754	Branching morphogenesis of an epithelial tube	7	131	0.99	0.00032	LRP5,SHH,WT1,SMAD4,TGFBR2,AR,GDNF
GO Process	GO:0060070	Canonical wnt signaling pathway	6	85	2023-11-01	0.00032	APC,LRP5,MITF,SHH,PROP1,PTEN
GO Process	GO:0007004	Telomere maintenance via telomerase	4	22	1.53	0.00036	TERT,MRE11A,DKC1,RAD50
GO Process	GO:0003007	Heart morphogenesis	9	251	0.82	0.00037	SHH,NKX2-5,GATA4,SMAD4,MYH7,TGFBR2,MTOR,STIL,ASXL1
GO Process	GO:0060341	Regulation of cellular localization	18	1027	0.51	0.00037	APC,HTRA2,HNRNPU,LRP5,SHH,CDT1,TERT,PTPN11,ACTB,NF1,PARK2,DKC1,PTEN,HDAC8,AR,PDX1,GDNF,DNM1L
GO Process	GO:0009798	Axis specification	6	88	2023-01-01	0.00038	SIX3,SHH,WT1,SMAD4,STIL,PAX6
GO Process	GO:0019827	Stem cell population maintenance	7	135	0.98	0.00038	KIT,FANCC,LRP5,SMC1A,SMAD4,MCPH1,ASPM
GO Process	GO:0044648	Histone h3-k4 dimethylation	3	6	1.97	0.00040	SETD1A,KMT2D,KMT2A
GO Process	GO:0002052	Positive regulation of neuroblast proliferation	4	23	1.51	0.00041	SHH,ZNF335,ASPM,PAX6
GO Process	GO:0007166	Cell surface receptor signaling pathway	29	2325	0.36	0.00041	CSNK2A1,APC,CREBBP,EP300,NOTCH3,SOD1,KIT,LRP5,MITF,SHH,PROP1,TUBB3,PTPN11,SMAD4,RET,ACTB,NF1,TGFBR2,PSEN2,STIL,PTEN,TDP2,PDX1,CENPJ,DDX3X,PAX6,WWOX,RPS19,GHR
GO Process	GO:0022616	DNA strand elongation	4	23	1.51	0.00041	NBN,TERT,MRE11A,RAD50
GO Process	GO:0046599	Regulation of centriole replication	4	23	1.51	0.00041	CDK5RAP2,STIL,CENPJ,BRCA1
GO Process	GO:0035239	Tube morphogenesis	14	656	0.6	0.00046	NOTCH3,LRP5,SHH,NKX2-5,WT1,GATA4,SMAD4,RET,NF1,TGFBR2,STIL,PTEN,AR,GDNF
GO Process	GO:1903429	Regulation of cell maturation	4	24	1.49	0.00046	PPP2R1A,RET,MTOR,OPA1
GO Process	GO:0001541	Ovarian follicle development	5	53	1.24	0.00047	SOD1,ATM,KIT,SMAD4,FANCG
GO Process	GO:0007131	Reciprocal meiotic recombination	5	53	1.24	0.00047	FANCM,ATM,MRE11A,RAD51C,RAD50
GO Process	GO:0043085	Positive regulation of catalytic activity	22	1489	0.44	0.00047	HTRA2,NBN,SOD1,HNRNPU,KIT,TERT,MRE11A,PTPN11,RET,ERCC6,NF1,VCP,TGFBR2,MTOR,PSEN2,DKC1,PTEN,RAD50,DDX3X,GDNF,DNM1L,GHR
GO Process	GO:1902275	Regulation of chromatin organization	8	198	0.87	0.00049	SETD1A,ATM,HNRNPU,ZNF335,SMAD4,ATRX,BRCA1,KMT2A
GO Process	GO:1901701	Cellular response to oxygen-containing compound	18	1055	0.5	0.00050	APC,HTRA2,SOD1,ATM,FANCC,WT1,GATA4,RET,ACTB,VCP,MTOR,OPA1,PARK2,PTEN,AR,BRCA1,DNM1L,GHR
GO Process	GO:0048638	Regulation of developmental growth	10	333	0.74	0.00051	HTRA2,SOD1,NKX2-5,WT1,TGFBR2,MTOR,PARK2,PTEN,AR,GHR
GO Process	GO:0060348	Bone development	8	199	0.87	0.00051	EP300,KIT,LRP5,ANKRD11,PTPN11,MCPH1,TGFBR2,ASXL1
GO Process	GO:0006928	Movement of cell or subcellular component	22	1501	0.43	0.00052	PHOX2B,APC,SIX3,NOTCH3,SOD1,HNRNPU,KIT,LRP5,SHH,PROP1,TUBB3,PTPN11,SMAD4,MYH7,RET,ACTB,OPA1,ASPM,PTEN,PAX6,GDNF,RPS19
GO Process	GO:1903706	Regulation of hemopoiesis	12	493	0.65	0.00054	CREBBP,SETD1A,EP300,SOD1,MITF,SHH,KMT2D,NF1,TGFBR2,MTOR,FANCA,KMT2A
GO Process	GO:0032210	Regulation of telomere maintenance via telomerase	5	55	1.22	0.00055	TINF2,ATM,HNRNPU,ATR,DKC1
GO Process	GO:0040029	Regulation of gene expression, epigenetic	8	202	0.86	0.00055	EP300,HNRNPU,KMT2D,ZNF335,PRMT7,ERCC6,ACTB,BRCA1
GO Process	GO:0048812	Neuron projection morphogenesis	12	495	0.65	0.00056	PHOX2B,NOTCH3,SHH,TUBB3,ZNF335,PTPN11,SMAD4,RET,ACTB,PTEN,PAX6,GDNF
GO Process	GO:0046620	Regulation of organ growth	6	96	2023-06-01	0.00057	SOD1,NKX2-5,WT1,TGFBR2,MTOR,PTEN
GO Process	GO:1904353	Regulation of telomere capping	4	26	1.45	0.00059	NBN,ATM,RTEL1,RAD50
GO Process	GO:0040008	Regulation of growth	14	676	0.58	0.00060	CSNK2A1,HTRA2,SOD1,PPP2R1A,NKX2-5,WT1,SMAD4,TGFBR2,MTOR,PARK2,PTEN,AR,DDX3X,GHR
GO Process	GO:1903322	Positive regulation of protein modification by small protein conjugation or removal	7	147	0.94	0.00060	FANCM,FANCI,VCP,PARK2,PTEN,DDX3X,BRCA1
GO Process	GO:0001822	Kidney development	9	271	0.79	0.00062	NOTCH3,SHH,FRAS1,WT1,SMAD4,RET,NF1,ASXL1,GDNF
GO Process	GO:0050790	Regulation of catalytic activity	29	2386	0.35	0.00062	CSNK2A1,APC,HTRA2,NBN,SOD1,HNRNPU,KIT,LRP5,TERT,PPP2R1A,MRE11A,PTPN11,MCPH1,RET,ERCC6,ACTB,NF1,VCP,TGFBR2,MTOR,PSEN2,PARK2,DKC1,PTEN,RAD50,DDX3X,GDNF,DNM1L,GHR
GO Process	GO:0022612	Gland morphogenesis	6	99	2023-05-01	0.00066	LRP5,SHH,PROP1,TGFBR2,AR,PAX6
GO Process	GO:0031329	Regulation of cellular catabolic process	16	875	0.53	0.00066	CSNK2A1,MFN2,HTRA2,EP300,ATM,HNRNPU,SHH,GATA4,VCP,MTOR,PARK2,DKC1,PTEN,GDNF,DNM1L,GFAP
GO Process	GO:0098813	Nuclear chromosome segregation	8	209	0.85	0.00068	FANCM,ATM,CDT1,SMC1A,PPP2R1A,MRE11A,RAD51C,HDAC8
GO Process	GO:1902532	Negative regulation of intracellular signal transduction	12	508	0.64	0.00070	MFN2,HTRA2,ATM,PPP2R1A,SMAD4,NF1,MTOR,OPA1,PARK2,PTEN,PDX1,DDX3X
GO Process	GO:0097692	Histone h3-k4 monomethylation	3	8	1.84	0.00072	SETD1A,KMT2D,KMT2A
GO Process	GO:1904354	Negative regulation of telomere capping	3	8	1.84	0.00072	NBN,ATM,RAD50
GO Process	GO:0031954	Positive regulation of protein autophosphorylation	4	28	1.42	0.00075	NBN,MRE11A,RAD50,DDX3X
GO Process	GO:0042327	Positive regulation of phosphorylation	18	1093	0.48	0.00075	NBN,SOD1,ATM,KIT,MRE11A,GATA4,PTPN11,SMAD4,RET,ERCC6,VCP,TGFBR2,MTOR,PTEN,AR,RAD50,DDX3X,GHR
GO Process	GO:0022603	Regulation of anatomical structure morphogenesis	18	1095	0.48	0.00076	KIT,SHH,TERT,WT1,GATA4,SMAD4,RET,NF1,TGFBR2,MTOR,OPA1,PARK2,PTEN,AR,GRIP1,GDNF,BRCA1,DNM1L
GO Process	GO:0046605	Regulation of centrosome cycle	5	60	1.19	0.00077	MCPH1,CDK5RAP2,STIL,CENPJ,BRCA1
GO Process	GO:0051569	Regulation of histone h3-k4 methylation	4	29	1.41	0.00084	ZNF335,SMAD4,BRCA1,KMT2A
GO Process	GO:1904837	beta-catenin-TCF complex assembly	4	29	1.41	0.00084	CREBBP,EP300,KMT2D,TERT
GO Process	GO:0051347	Positive regulation of transferase activity	14	705	0.56	0.00091	NBN,SOD1,KIT,MRE11A,PTPN11,RET,ERCC6,TGFBR2,MTOR,DKC1,PTEN,RAD50,DDX3X,GHR
GO Process	GO:0007283	Spermatogenesis	12	525	0.63	0.00093	HERC2,SOD1,KIT,RAD51C,SMAD4,OCA2,SYNE1,ASPM,ATRX,AR,FANCG,BRCA2
GO Process	GO:0044818	Mitotic g2/m transition checkpoint	4	30	1.39	0.00094	NBN,ATM,MRE11A,BRCA1
GO Process	GO:0051298	Centrosome duplication	4	30	1.39	0.00094	CDK5RAP2,STIL,BRCA2,CENPJ
GO Process	GO:0023052	Signaling	48	5239	0.23	0.00098	CSNK2A1,PROKR2,APC,HTRA2,CREBBP,EP300,NOTCH3,NBN,SOD1,ATM,KIT,LRP5,MITF,SHH,SLC18A2,PROP1,TUBB3,PPP2R1A,GATA4,PTPN11,SMAD4,RET,ERCC6,ACTB,NF1,VCP,TGFBR2,SLC6A9,MTOR,PSEN2,PARK2,STIL,PTEN,ATRX,AR,TDP2,BRCA2,PDX1,CENPJ,GRIP1,DDX3X,PAX6,GDNF,BRCA1,DNM1L,WWOX,RPS19,GHR
GO Process	GO:0001947	Heart looping	5	64	1.16	0.0010	SHH,NKX2-5,GATA4,TGFBR2,STIL
GO Process	GO:0035051	Cardiocyte differentiation	6	109	2023-01-01	0.0010	HNRNPU,NKX2-5,WT1,GATA4,SMAD4,MTOR
GO Process	GO:0045859	Regulation of protein kinase activity	15	812	0.53	0.0010	APC,SOD1,KIT,LRP5,PPP2R1A,PTPN11,RET,ERCC6,ACTB,NF1,TGFBR2,MTOR,PTEN,DDX3X,GHR
GO Process	GO:0001934	Positive regulation of protein phosphorylation	17	1019	0.49	0.0011	NBN,SOD1,ATM,KIT,MRE11A,GATA4,PTPN11,SMAD4,RET,ERCC6,TGFBR2,MTOR,PTEN,AR,RAD50,DDX3X,GHR
GO Process	GO:0006275	Regulation of dna replication	6	111	1.0	0.0011	NBN,CDT1,PPP2R1A,ATR,ATRX,BRCA2
GO Process	GO:0016233	Telomere capping	4	32	1.36	0.0011	NBN,TINF2,MRE11A,RAD50
GO Process	GO:0031572	G2 DNA damage checkpoint	4	32	1.36	0.0011	NBN,ATM,MRE11A,BRCA1
GO Process	GO:0048568	Embryonic organ development	11	448	0.66	0.0011	SIX3,SOD1,KIT,SHH,NKX2-5,GATA4,TGFBR2,STIL,PAX6,GDNF,KMT2A
GO Process	GO:1905818	Regulation of chromosome separation	5	65	1.15	0.0011	CSNK2A1,APC,ATM,CDT1,CDK5RAP2
GO Process	GO:2001242	Regulation of intrinsic apoptotic signaling pathway	7	164	0.9	0.0011	HTRA2,SOD1,OPA1,PARK2,PDX1,DDX3X,DNM1L
GO Process	GO:0007127	Meiosis i	6	112	1.0	0.0012	FANCM,ATM,MRE11A,RAD51C,RAD50,BRCA2
GO Process	GO:0040011	Locomotion	19	1251	0.45	0.0012	PHOX2B,APC,SIX3,EP300,NOTCH3,KIT,LRP5,SHH,PROP1,TUBB3,PTPN11,SMAD4,RET,ACTB,ASPM,PTEN,PAX6,GDNF,RPS19
GO Process	GO:0051098	Regulation of binding	10	373	0.69	0.0012	EP300,CDT1,TERT,SMAD4,PRMT7,ACTB,PARK2,HDAC8,PDX1,PAX6
GO Process	GO:0060420	Regulation of heart growth	5	67	1.14	0.0012	NKX2-5,WT1,TGFBR2,MTOR,PTEN
GO Process	GO:1902850	Microtubule cytoskeleton organization involved in mitosis	6	112	1.0	0.0012	SMC1A,MCPH1,CDK5RAP2,VCP,STIL,PAX6
GO Process	GO:0009894	Regulation of catabolic process	17	1038	0.48	0.0013	CSNK2A1,MFN2,APC,HTRA2,EP300,ATM,HNRNPU,SHH,GATA4,VCP,MTOR,PARK2,DKC1,PTEN,GDNF,DNM1L,GFAP
GO Process	GO:0032880	Regulation of protein localization	16	934	0.5	0.0013	APC,HTRA2,LRP5,SHH,CDT1,TERT,PTPN11,ACTB,NF1,PARK2,DKC1,HDAC8,AR,PDX1,CENPJ,DNM1L
GO Process	GO:0071310	Cellular response to organic substance	28	2369	0.34	0.0013	PROKR2,PHOX2B,APC,HTRA2,EP300,SOD1,ATM,HNRNPU,KIT,WT1,GATA4,PTPN11,SMAD4,RET,ACTB,VCP,TGFBR2,MTOR,OPA1,PARK2,PTEN,AR,GRIP1,PAX6,BRCA1,DNM1L,WWOX,GHR
GO Process	GO:0031060	Regulation of histone methylation	5	70	2023-12-01	0.0014	ZNF335,SMAD4,ATRX,BRCA1,KMT2A
GO Process	GO:0048853	Forebrain morphogenesis	3	11	2023-07-01	0.0014	PROP1,NF1,PTEN
GO Process	GO:2000615	Regulation of histone h3-k9 acetylation	3	11	2023-07-01	0.0014	SMAD4,BRCA1,KMT2A
GO Process	GO:0034968	Histone lysine methylation	5	71	2023-11-01	0.0015	SETD1A,KMT2D,ZNF335,EHMT1,KMT2A
GO Process	GO:0003208	Cardiac ventricle morphogenesis	5	72	2023-11-01	0.0016	NKX2-5,GATA4,SMAD4,MYH7,TGFBR2
GO Process	GO:0007219	Notch signaling pathway	6	120	0.97	0.0016	CREBBP,EP300,NOTCH3,TGFBR2,PSEN2,RPS19
GO Process	GO:0018130	Heterocycle biosynthetic process	17	1061	0.47	0.0016	CDK13,CREBBP,NOTCH3,MITF,TERT,MRE11A,SMAD4,ERCC6,VCP,MTOR,DKC1,PTEN,AR,ASXL1,RAD50,PDX1,PAX6
GO Process	GO:0031346	Positive regulation of cell projection organization	10	391	0.67	0.0016	APC,EP300,KIT,RET,MTOR,OPA1,PARK2,CENPJ,GRIP1,DNM1L
GO Process	GO:0000722	Telomere maintenance via recombination	3	12	1.66	0.0017	RAD51C,RAD50,BRCA2
GO Process	GO:0010001	Glial cell differentiation	7	178	0.86	0.0017	PHOX2B,SOD1,SHH,PTPN11,NF1,PTEN,PAX6
GO Process	GO:0048484	Enteric nervous system development	3	12	1.66	0.0017	PHOX2B,RET,GDNF
GO Process	GO:0060736	Prostate gland growth	3	12	1.66	0.0017	SHH,PTEN,AR
GO Process	GO:0072520	Seminiferous tubule development	3	12	1.66	0.0017	SMAD4,ATRX,AR
GO Process	GO:0019438	Aromatic compound biosynthetic process	17	1070	0.47	0.0018	CDK13,CREBBP,NOTCH3,MITF,TERT,MRE11A,SMAD4,OCA2,ERCC6,VCP,DKC1,PTEN,AR,ASXL1,RAD50,PDX1,PAX6
GO Process	GO:0021536	Diencephalon development	5	74	2023-01-01	0.0018	SIX3,SHH,PROP1,SOX3,PAX6
GO Process	GO:0097659	Nucleic acid-templated transcription	12	568	0.59	0.0018	CDK13,CREBBP,NOTCH3,MITF,TERT,SMAD4,ERCC6,PTEN,AR,ASXL1,PDX1,PAX6
GO Process	GO:1903827	Regulation of cellular protein localization	12	568	0.59	0.0018	APC,HTRA2,SHH,CDT1,TERT,PTPN11,ACTB,NF1,PARK2,DKC1,HDAC8,AR
GO Process	GO:1904358	Positive regulation of telomere maintenance via telomere lengthening	4	37	2023-03-01	0.0018	ATM,ATR,RTEL1,DKC1
GO Process	GO:0003156	Regulation of animal organ formation	4	38	1.29	0.0020	SHH,WT1,AR,GDNF
GO Process	GO:0031398	Positive regulation of protein ubiquitination	6	126	0.94	0.0020	FANCM,FANCI,PARK2,PTEN,DDX3X,BRCA1
GO Process	GO:0043414	Macromolecule methylation	8	249	0.77	0.0020	CREBBP,SETD1A,KMT2D,ZNF335,PRMT7,ATRX,EHMT1,KMT2A
GO Process	GO:0072006	Nephron development	6	126	0.94	0.0020	NOTCH3,SHH,WT1,SMAD4,ASXL1,GDNF
GO Process	GO:0000212	Meiotic spindle organization	3	13	1.63	0.0021	PPP2R1A,ASPM,ATRX
GO Process	GO:0010635	Regulation of mitochondrial fusion	3	13	1.63	0.0021	OPA1,PARK2,DNM1L
GO Process	GO:0021978	Telencephalon regionalization	3	13	1.63	0.0021	SIX3,SHH,PAX6
GO Process	GO:0090399	Replicative senescence	3	13	1.63	0.0021	ATM,TERT,ATR
GO Process	GO:0048565	Digestive tract development	6	128	0.94	0.0022	KIT,SHH,GATA4,RET,TGFBR2,PDX1
GO Process	GO:0051101	Regulation of dna binding	6	128	0.94	0.0022	EP300,CDT1,PARK2,HDAC8,PDX1,PAX6
GO Process	GO:0010467	Gene expression	25	2056	0.35	0.0023	CDK13,HTRA2,CREBBP,EP300,NOTCH3,HNRNPU,KIT,MITF,SHH,TERT,PPP2R1A,WT1,SMAD4,PRMT7,ERCC6,PSEN2,DKC1,PTEN,AR,ASXL1,PDX1,DDX3X,PAX6,EIF3F,RPS19
GO Process	GO:0090184	Positive regulation of kidney development	4	40	1.27	0.0023	SHH,WT1,RET,GDNF
GO Process	GO:1900034	Regulation of cellular response to heat	5	79	2023-07-01	0.0023	CREBBP,EP300,ATM,ATR,MTOR
GO Process	GO:1901362	Organic cyclic compound biosynthetic process	18	1211	0.44	0.0023	CDK13,CREBBP,NOTCH3,MITF,TERT,MRE11A,SMAD4,OCA2,ERCC6,VCP,MTOR,DKC1,PTEN,AR,ASXL1,RAD50,PDX1,PAX6
GO Process	GO:0031330	Negative regulation of cellular catabolic process	8	258	0.76	0.0024	CSNK2A1,HTRA2,HNRNPU,SHH,GATA4,MTOR,DKC1,GDNF
GO Process	GO:0032481	Positive regulation of type i interferon production	5	80	2023-06-01	0.0024	CREBBP,EP300,MRE11A,PTPN11,DDX3X
GO Process	GO:0034654	Nucleobase-containing compound biosynthetic process	16	995	0.47	0.0024	CDK13,CREBBP,NOTCH3,MITF,TERT,MRE11A,SMAD4,ERCC6,VCP,DKC1,PTEN,AR,ASXL1,RAD50,PDX1,PAX6
GO Process	GO:0050680	Negative regulation of epithelial cell proliferation	6	131	0.93	0.0024	TINF2,NF1,PTEN,AR,BRCA2,PAX6
GO Process	GO:0072073	Kidney epithelium development	6	130	0.93	0.0024	SHH,WT1,SMAD4,RET,ASXL1,GDNF
GO Process	GO:0072075	Metanephric mesenchyme development	3	14	2023-06-01	0.0024	SHH,WT1,SMAD4
GO Process	GO:0072216	Positive regulation of metanephros development	3	14	2023-06-01	0.0024	WT1,RET,GDNF
GO Process	GO:1904923	Regulation of autophagy of mitochondrion in response to mitochondrial depolarization	3	14	2023-06-01	0.0024	MFN2,HTRA2,PARK2
GO Process	GO:0007098	Centrosome cycle	5	81	2023-06-01	0.0025	CDK5RAP2,STIL,BRCA2,CENPJ,BRCA1
GO Process	GO:0045637	Regulation of myeloid cell differentiation	8	260	0.75	0.0025	CREBBP,SETD1A,EP300,MITF,KMT2D,NF1,MTOR,KMT2A
GO Process	GO:0055024	Regulation of cardiac muscle tissue development	5	81	2023-06-01	0.0025	NKX2-5,SMAD4,TGFBR2,MTOR,PTEN
GO Process	GO:0070507	Regulation of microtubule cytoskeleton organization	7	192	0.83	0.0025	APC,HNRNPU,MCPH1,CDK5RAP2,STIL,CENPJ,BRCA1
GO Process	GO:0000819	Sister chromatid segregation	6	133	0.92	0.0026	CDT1,SMC1A,PPP2R1A,MRE11A,RAD51C,HDAC8
GO Process	GO:0016202	Regulation of striated muscle tissue development	6	133	0.92	0.0026	SHH,NKX2-5,SMAD4,TGFBR2,MTOR,PTEN
GO Process	GO:0021983	Pituitary gland development	4	42	1.25	0.0026	SIX3,PROP1,SOX3,PAX6
GO Process	GO:1901992	Positive regulation of mitotic cell cycle phase transition	5	82	2023-05-01	0.0026	PHOX2B,CDT1,TERT,RAD51C,DDX3X
GO Process	GO:0010506	Regulation of autophagy	9	340	0.69	0.0027	MFN2,HTRA2,EP300,ATM,GATA4,MTOR,PARK2,DNM1L,GFAP
GO Process	GO:0031400	Negative regulation of protein modification process	12	602	0.57	0.0028	APC,TINF2,LRP5,PPP2R1A,SMAD4,NF1,MTOR,PARK2,PTEN,HDAC8,PAX6,BRCA1
GO Process	GO:0007292	Female gamete generation	6	136	0.91	0.0029	ATM,KMT2D,PPP2R1A,RAD51C,ASPM,BRCA2
GO Process	GO:0035556	Intracellular signal transduction	22	1712	0.38	0.0029	HTRA2,EP300,NBN,ATM,KIT,SHH,PPP2R1A,SMAD4,RET,ERCC6,NF1,MTOR,PSEN2,PTEN,ATRX,BRCA2,PDX1,GRIP1,DDX3X,GDNF,BRCA1,WWOX
GO Process	GO:0048660	Regulation of smooth muscle cell proliferation	6	136	0.91	0.0029	MFN2,NOTCH3,TERT,TGFBR2,MTOR,PTEN
GO Process	GO:0055007	Cardiac muscle cell differentiation	5	84	2023-04-01	0.0029	HNRNPU,NKX2-5,WT1,GATA4,MTOR
GO Process	GO:1903146	Regulation of autophagy of mitochondrion	4	43	1.23	0.0029	MFN2,HTRA2,PARK2,DNM1L
GO Process	GO:0001658	Branching involved in ureteric bud morphogenesis	4	44	1.22	0.0030	SHH,WT1,SMAD4,GDNF
GO Process	GO:0014033	Neural crest cell differentiation	5	85	2023-04-01	0.0030	PHOX2B,SHH,SMAD4,RET,GDNF
GO Process	GO:0036294	Cellular response to decreased oxygen levels	7	199	0.81	0.0030	CREBBP,EP300,TERT,MTOR,OPA1,PTEN,DNM1L
GO Process	GO:0048483	Autonomic nervous system development	4	44	1.22	0.0030	PHOX2B,RET,NF1,GDNF
GO Process	GO:0001657	Ureteric bud development	5	86	2023-03-01	0.0031	SHH,WT1,SMAD4,RET,GDNF
GO Process	GO:0014070	Response to organic cyclic compound	15	911	0.48	0.0031	SOD1,HNRNPU,WT1,ACTB,TGFBR2,MTOR,OPA1,PARK2,PTEN,AR,PDX1,GRIP1,BRCA1,DNM1L,GHR
GO Process	GO:0007165	Signal transduction	44	4876	0.22	0.0033	CSNK2A1,PROKR2,APC,HTRA2,CREBBP,EP300,NOTCH3,NBN,SOD1,ATM,KIT,LRP5,MITF,SHH,PROP1,TUBB3,PPP2R1A,PTPN11,SMAD4,RET,ERCC6,ACTB,NF1,VCP,TGFBR2,MTOR,PSEN2,STIL,PTEN,ATRX,AR,TDP2,BRCA2,PDX1,CENPJ,GRIP1,DDX3X,PAX6,GDNF,BRCA1,DNM1L,WWOX,RPS19,GHR
GO Process	GO:0016055	Wnt signaling pathway	9	351	0.68	0.0033	CSNK2A1,APC,LRP5,MITF,SHH,PROP1,PTEN,DDX3X,WWOX
GO Process	GO:0034613	Cellular protein localization	21	1610	0.38	0.0033	MFN2,SIX3,HERC2,TINF2,ATM,HNRNPU,SHH,TERT,MCPH1,ATR,VCP,PARK2,SYNE1,STIL,ATRX,BRCA2,GRIP1,DDX3X,PAX6,DNM1L,RPS19
GO Process	GO:0045132	Meiotic chromosome segregation	5	87	2023-03-01	0.0033	FANCM,ATM,PPP2R1A,MRE11A,RAD51C
GO Process	GO:0007411	Axon guidance	8	275	0.73	0.0034	NOTCH3,SHH,TUBB3,PTPN11,SMAD4,RET,PAX6,GDNF
GO Process	GO:0007623	Circadian rhythm	6	142	0.89	0.0034	PROKR2,SIX3,EP300,HNRNPU,PTEN,KMT2A
GO Process	GO:0048661	Positive regulation of smooth muscle cell proliferation	5	88	2023-02-01	0.0034	MFN2,NOTCH3,TERT,TGFBR2,MTOR
GO Process	GO:0060047	Heart contraction	5	88	2023-02-01	0.0034	SOD1,NKX2-5,MYH7,MTOR,DNM1L
GO Process	GO:0007140	Male meiotic nuclear division	4	46	1.21	0.0035	ATM,RAD51C,BRCA2,FANCA
GO Process	GO:0042060	Wound healing	10	439	0.62	0.0035	PROC,MFN2,SHH,GATA4,RAD51C,PTPN11,ACTB,NF1,TGFBR2,MTOR
GO Process	GO:0048538	Thymus development	4	46	1.21	0.0035	SOD1,ATM,SHH,ASXL1
GO Process	GO:0051646	Mitochondrion localization	4	46	1.21	0.0035	MFN2,ALB,OPA1,DNM1L
GO Process	GO:0110110	Positive regulation of animal organ morphogenesis	5	89	2023-02-01	0.0035	WT1,SMAD4,TGFBR2,AR,GDNF
GO Process	GO:0033674	Positive regulation of kinase activity	12	624	0.55	0.0037	NBN,SOD1,KIT,MRE11A,PTPN11,RET,ERCC6,TGFBR2,MTOR,RAD50,DDX3X,GHR
GO Process	GO:0035855	Megakaryocyte development	3	17	1.51	0.0037	EP300,KIT,PTPN11
GO Process	GO:1902533	Positive regulation of intracellular signal transduction	16	1041	0.45	0.0037	EP300,SOD1,ATM,KIT,GATA4,PTPN11,ATR,RET,ERCC6,MTOR,PARK2,PTEN,AR,DDX3X,DNM1L,GHR
GO Process	GO:0032269	Negative regulation of cellular protein metabolic process	16	1043	0.45	0.0038	CSNK2A1,APC,TINF2,LRP5,SHH,PPP2R1A,WT1,SMAD4,NF1,MTOR,PARK2,PTEN,HDAC8,DDX3X,PAX6,BRCA1
GO Process	GO:0043408	Regulation of mapk cascade	13	725	0.52	0.0038	SOD1,KIT,PPP2R1A,GATA4,PTPN11,SMAD4,RET,ERCC6,NF1,PARK2,PTEN,AR,GHR
GO Process	GO:0097694	Establishment of rna localization to telomere	2	2	2.27	0.0038	ATM,ATR
GO Process	GO:0097695	Establishment of protein-containing complex localization to telomere	2	2	2.27	0.0038	ATM,ATR
GO Process	GO:1904884	Positive regulation of telomerase catalytic core complex assembly	2	2	2.27	0.0038	ATM,ATR
GO Process	GO:0048806	Genitalia development	4	48	1.19	0.0039	SHH,WT1,PTPN11,AR
GO Process	GO:0060324	Face development	4	48	1.19	0.0039	EP300,ANKRD11,PTPN11,SOX3
GO Process	GO:0010035	Response to inorganic substance	11	538	0.58	0.0040	SOD1,KIT,FANCC,SHH,TERT,ERCC6,VCP,PARK2,PTEN,ATRX,PDX1
GO Process	GO:0000303	Response to superoxide	3	18	1.49	0.0041	SOD1,FANCC,ERCC6
GO Process	GO:0007221	Positive regulation of transcription of notch receptor target	3	18	1.49	0.0041	CREBBP,EP300,NOTCH3
GO Process	GO:0042326	Negative regulation of phosphorylation	10	449	0.61	0.0041	APC,HNRNPU,LRP5,PPP2R1A,SMAD4,NF1,MTOR,PARK2,PTEN,PAX6
GO Process	GO:0051571	Positive regulation of histone h3-k4 methylation	3	18	1.49	0.0041	SMAD4,BRCA1,KMT2A
GO Process	GO:1901524	Regulation of mitophagy	3	18	1.49	0.0041	MFN2,HTRA2,PARK2
GO Process	GO:1905207	Regulation of cardiocyte differentiation	4	49	1.18	0.0041	NKX2-5,GATA4,SMAD4,MTOR
GO Process	GO:0043254	Regulation of protein-containing complex assembly	10	451	0.61	0.0042	EP300,ATM,CDT1,PTPN11,ATR,CDK5RAP2,VCP,MTOR,DDX3X,GFAP
GO Process	GO:0044271	Cellular nitrogen compound biosynthetic process	20	1522	0.38	0.0042	CDK13,CREBBP,NOTCH3,MITF,TERT,MRE11A,SMAD4,ERCC6,VCP,MTOR,DKC1,PTEN,AR,ASXL1,RAD50,PDX1,DDX3X,PAX6,EIF3F,RPS19
GO Process	GO:0035108	Limb morphogenesis	6	150	0.87	0.0043	CREBBP,LRP5,SHH,FRAS1,SMAD4,ATRX
GO Process	GO:0031056	Regulation of histone modification	6	151	0.87	0.0045	ATM,ZNF335,SMAD4,ATRX,BRCA1,KMT2A
GO Process	GO:0042330	Taxis	11	547	0.57	0.0045	EP300,NOTCH3,KIT,SHH,TUBB3,PTPN11,SMAD4,RET,PAX6,GDNF,RPS19
GO Process	GO:0007517	Muscle organ development	8	291	0.71	0.0046	PHOX2B,EP300,NKX2-5,WT1,SMAD4,MYH7,NF1,CHD2
GO Process	GO:0032784	Regulation of dna-templated transcription, elongation	4	51	1.16	0.0047	CDK13,HNRNPU,SHH,ERCC6
GO Process	GO:0090329	Regulation of dna-dependent dna replication	4	51	1.16	0.0047	NBN,CDT1,ATRX,BRCA2
GO Process	GO:0009636	Response to toxic substance	7	219	0.77	0.0048	HTRA2,SOD1,FANCC,ALB,ERCC6,PARK2,EHMT1
GO Process	GO:1901991	Negative regulation of mitotic cell cycle phase transition	7	219	0.77	0.0048	APC,EP300,NBN,ATM,MRE11A,PTEN,BRCA1
GO Process	GO:0001755	Neural crest cell migration	4	52	1.15	0.0050	PHOX2B,SHH,RET,GDNF
GO Process	GO:0003179	Heart valve morphogenesis	4	52	1.15	0.0050	GATA4,SMAD4,TGFBR2,MTOR
GO Process	GO:0030099	Myeloid cell differentiation	7	221	0.77	0.0050	EP300,KIT,MITF,PTPN11,TGFBR2,KAT6A,RPS19
GO Process	GO:0032147	Activation of protein kinase activity	9	376	0.65	0.0050	SOD1,KIT,PTPN11,RET,ERCC6,TGFBR2,MTOR,DDX3X,GHR
GO Process	GO:0043489	RNA stabilization	4	52	1.15	0.0050	HNRNPU,MTOR,DKC1,GDNF
GO Process	GO:0051653	Spindle localization	4	52	1.15	0.0050	MCPH1,CDK5RAP2,ASPM,PAX6
GO Process	GO:0072009	Nephron epithelium development	5	98	0.97	0.0050	SHH,WT1,SMAD4,ASXL1,GDNF
GO Process	GO:0033993	Response to lipid	14	858	0.48	0.0051	HTRA2,ATM,HNRNPU,GATA4,RET,TGFBR2,PTEN,AR,ASXL1,PDX1,GRIP1,BRCA1,DNM1L,GHR
GO Process	GO:0000266	Mitochondrial fission	3	20	1.44	0.0052	OPA1,PARK2,DNM1L
GO Process	GO:0007093	Mitotic cell cycle checkpoint	6	156	0.85	0.0052	APC,EP300,NBN,ATM,MRE11A,BRCA1
GO Process	GO:0043967	Histone h4 acetylation	4	53	1.14	0.0052	KANSL1,EP300,BRCA2,KMT2A
GO Process	GO:1901862	Negative regulation of muscle tissue development	4	53	1.14	0.0052	SHH,SMAD4,TGFBR2,PTEN
GO Process	GO:1902236	Negative regulation of endoplasmic reticulum stress-induced intrinsic apoptotic signaling pathway	3	20	1.44	0.0052	OPA1,PARK2,PDX1
GO Process	GO:2001243	Negative regulation of intrinsic apoptotic signaling pathway	5	99	0.97	0.0052	HTRA2,OPA1,PARK2,PDX1,DDX3X
GO Process	GO:0000187	Activation of mapk activity	6	157	0.85	0.0053	SOD1,KIT,PTPN11,RET,ERCC6,GHR
GO Process	GO:0001701	In utero embryonic development	9	382	0.64	0.0055	MFN2,NBN,ANKRD11,ZNF335,SMAD4,TGFBR2,STIL,AR,BRCA2
GO Process	GO:0009416	Response to light stimulus	8	302	0.69	0.0056	CREBBP,EP300,KIT,ATR,ERCC6,NF1,MTOR,BRCA2
GO Process	GO:0048562	Embryonic organ morphogenesis	8	301	0.69	0.0056	SIX3,SOD1,SHH,NKX2-5,GATA4,TGFBR2,STIL,PAX6
GO Process	GO:0071897	DNA biosynthetic process	5	101	0.96	0.0056	TERT,MRE11A,VCP,DKC1,RAD50
GO Process	GO:0003285	Septum secundum development	2	3	2023-09-02	0.0058	NKX2-5,GATA4
GO Process	GO:0006351	Transcription, dna-templated	11	567	0.55	0.0058	CDK13,CREBBP,NOTCH3,MITF,SMAD4,ERCC6,PTEN,AR,ASXL1,PDX1,PAX6
GO Process	GO:0007095	Mitotic g2 dna damage checkpoint	3	21	1.42	0.0058	NBN,ATM,MRE11A
GO Process	GO:0018076	N-terminal peptidyl-lysine acetylation	2	3	2023-09-02	0.0058	CREBBP,EP300
GO Process	GO:0030318	Melanocyte differentiation	3	21	1.42	0.0058	KIT,MITF,OCA2
GO Process	GO:0048485	Sympathetic nervous system development	3	21	1.42	0.0058	PHOX2B,NF1,GDNF
GO Process	GO:0048708	Astrocyte differentiation	4	55	1.13	0.0058	SHH,PTPN11,NF1,PAX6
GO Process	GO:0060769	Positive regulation of epithelial cell proliferation involved in prostate gland development	2	3	2023-09-02	0.0058	SHH,AR
GO Process	GO:0032870	Cellular response to hormone stimulus	11	569	0.55	0.0059	PROKR2,APC,HNRNPU,KIT,WT1,PTPN11,PTEN,AR,GRIP1,BRCA1,GHR
GO Process	GO:0007610	Behavior	11	572	0.55	0.0061	HTRA2,SIX3,EP300,SOD1,KIT,SLC18A2,NF1,MTOR,PARK2,PTEN,GDNF
GO Process	GO:0030071	Regulation of mitotic metaphase/anaphase transition	4	56	2023-12-01	0.0061	APC,ATM,CDT1,CDK5RAP2
GO Process	GO:0090257	Regulation of muscle system process	7	231	0.75	0.0061	SOD1,KIT,NKX2-5,GATA4,SMAD4,MYH7,MTOR
GO Process	GO:0007530	Sex determination	3	22	2023-04-01	0.0064	WT1,SOX3,AR
GO Process	GO:0016070	RNA metabolic process	20	1584	0.37	0.0064	CDK13,CREBBP,NOTCH3,ATM,HNRNPU,MITF,TERT,PPP2R1A,WT1,SMAD4,PRMT7,ERCC6,DKC1,PTEN,AR,ASXL1,PDX1,DDX3X,PAX6,RPS19
GO Process	GO:0035162	Embryonic hemopoiesis	3	22	2023-04-01	0.0064	KIT,TGFBR2,KMT2A
GO Process	GO:0055013	Cardiac muscle cell development	4	57	2023-11-01	0.0065	HNRNPU,NKX2-5,GATA4,MTOR
GO Process	GO:2001237	Negative regulation of extrinsic apoptotic signaling pathway	5	106	0.94	0.0066	TERT,AR,DDX3X,GDNF,BRCA1
GO Process	GO:0051649	Establishment of localization in cell	26	2375	0.31	0.0067	CDK13,PROC,MFN2,SIX3,HERC2,SOD1,ATM,HNRNPU,KIT,ALB,SLC18A2,CDT1,MCPH1,CDK5RAP2,ACTB,NF1,VCP,SLC6A9,OPA1,PARK2,DNAJC6,GRIP1,DDX3X,PAX6,DNM1L,RPS19
GO Process	GO:0010332	Response to gamma radiation	4	58	2023-01-01	0.0069	ATM,ATR,ERCC6,BRCA2
GO Process	GO:0006359	Regulation of transcription by rna polymerase iii	3	23	1.38	0.0071	MTOR,AR,BRCA1
GO Process	GO:0030539	Male genitalia development	3	23	1.38	0.0071	SHH,WT1,AR
GO Process	GO:0097150	Neuronal stem cell population maintenance	3	23	1.38	0.0071	FANCC,MCPH1,ASPM
GO Process	GO:0043388	Positive regulation of dna binding	4	59	2023-01-01	0.0072	EP300,PARK2,PDX1,PAX6
GO Process	GO:0016477	Cell migration	14	896	0.46	0.0073	PHOX2B,APC,SIX3,KIT,LRP5,SHH,PROP1,PTPN11,RET,ASPM,PTEN,PAX6,GDNF,RPS19
GO Process	GO:1901214	Regulation of neuron death	8	317	0.67	0.0073	HTRA2,SOD1,ATM,TERT,NF1,MTOR,PARK2,GDNF
GO Process	GO:0051270	Regulation of cellular component movement	15	1009	0.44	0.0074	APC,ATM,KIT,MITF,SHH,TERT,GATA4,RET,NF1,TGFBR2,MTOR,PTEN,PAX6,DNM1L,RPS19
GO Process	GO:0008283	Cell population proliferation	10	493	0.57	0.0075	SIX3,NBN,KIT,SHH,MRE11A,NKX2-5,SMAD4,OCA2,ASPM,BRCA2
GO Process	GO:0021510	Spinal cord development	5	110	0.92	0.0076	SHH,NF1,MTOR,PAX6,GDNF
GO Process	GO:0003181	Atrioventricular valve morphogenesis	3	24	1.36	0.0078	GATA4,SMAD4,TGFBR2
GO Process	GO:0006366	Transcription by rna polymerase ii	9	406	0.61	0.0079	CDK13,CREBBP,NOTCH3,SMAD4,ERCC6,PTEN,AR,PDX1,PAX6
GO Process	GO:0042692	Muscle cell differentiation	7	244	0.72	0.0080	HNRNPU,SHH,NKX2-5,WT1,GATA4,MTOR,SYNE1
GO Process	GO:0042733	Embryonic digit morphogenesis	4	61	2023-08-01	0.0080	CREBBP,LRP5,SHH,SMAD4
GO Process	GO:0048870	Cell motility	15	1018	0.43	0.0080	PHOX2B,APC,SIX3,KIT,LRP5,SHH,PROP1,PTPN11,RET,ACTB,ASPM,PTEN,PAX6,GDNF,RPS19
GO Process	GO:0055021	Regulation of cardiac muscle tissue growth	4	61	2023-08-01	0.0080	NKX2-5,TGFBR2,MTOR,PTEN
GO Process	GO:0001501	Skeletal system development	10	499	0.57	0.0081	EP300,KIT,LRP5,SHH,ANKRD11,PTPN11,MCPH1,TGFBR2,ASXL1,WWOX
GO Process	GO:0001568	Blood vessel development	10	500	0.57	0.0081	NOTCH3,LRP5,SHH,PROP1,NKX2-5,WT1,NF1,TGFBR2,PTEN,PAX6
GO Process	GO:0008104	Protein localization	24	2139	0.32	0.0081	MFN2,SIX3,HERC2,TINF2,ATM,HNRNPU,SHH,TERT,FRAS1,MCPH1,ATR,ACTB,VCP,PARK2,SYNE1,STIL,ATRX,BRCA2,PDX1,GRIP1,DDX3X,PAX6,DNM1L,RPS19
GO Process	GO:0009743	Response to carbohydrate	6	174	0.8	0.0081	CDT1,GATA4,TGFBR2,OPA1,PTEN,PDX1
GO Process	GO:0009786	Regulation of asymmetric cell division	2	4	1.97	0.0081	ASPM,PAX6
GO Process	GO:0010636	Positive regulation of mitochondrial fusion	2	4	1.97	0.0081	OPA1,PARK2
GO Process	GO:1990086	Lens fiber cell apoptotic process	2	4	1.97	0.0081	SIX3,TGFBR2
GO Process	GO:0001933	Negative regulation of protein phosphorylation	9	411	0.61	0.0083	APC,LRP5,PPP2R1A,SMAD4,NF1,MTOR,PARK2,PTEN,PAX6
GO Process	GO:0006508	Proteolysis	17	1256	0.4	0.0083	PROC,APC,HTRA2,HERC2,EP300,SHH,SMAD4,RET,ACTB,VCP,PSEN2,PARK2,PTEN,AR,ASXL1,BRCA1,EIF3F
GO Process	GO:0010823	Negative regulation of mitochondrion organization	4	62	2023-08-01	0.0083	HTRA2,OPA1,PARK2,DNM1L
GO Process	GO:0051099	Positive regulation of binding	6	175	0.8	0.0083	EP300,CDT1,TERT,PARK2,PDX1,PAX6
GO Process	GO:0002053	Positive regulation of mesenchymal cell proliferation	3	25	1.35	0.0084	LRP5,SHH,TGFBR2
GO Process	GO:0044030	Regulation of dna methylation	3	25	1.35	0.0084	WT1,BRCA1,KMT2A
GO Process	GO:0007267	Cell-cell signaling	16	1145	0.41	0.0088	CSNK2A1,APC,LRP5,MITF,SHH,SLC18A2,PROP1,GATA4,NF1,SLC6A9,PARK2,PTEN,AR,PDX1,DDX3X,WWOX
GO Process	GO:0031334	Positive regulation of protein-containing complex assembly	7	249	0.72	0.0088	ATM,CDT1,ATR,CDK5RAP2,VCP,MTOR,DDX3X
GO Process	GO:0002682	Regulation of immune system process	19	1514	0.36	0.0092	CREBBP,SETD1A,EP300,SOD1,ATM,KIT,MITF,SHH,KMT2D,ZNF335,PTPN11,ACTB,NF1,TGFBR2,MTOR,FANCA,KMT2A,DNM1L,RPS19
GO Process	GO:0030177	Positive regulation of wnt signaling pathway	6	182	0.78	0.0100	CSNK2A1,SHH,TERT,VCP,ASPM,DDX3X
GO Process	GO:0033673	Negative regulation of kinase activity	7	255	0.7	0.0100	APC,HNRNPU,LRP5,PPP2R1A,NF1,PARK2,PTEN
GO Process	GO:0001504	Neurotransmitter uptake	3	27	1.31	0.0101	SLC18A2,SLC6A9,PARK2
GO Process	GO:0003148	Outflow tract septum morphogenesis	3	27	1.31	0.0101	NKX2-5,SMAD4,TGFBR2
GO Process	GO:0010660	Regulation of muscle cell apoptotic process	4	66	2023-05-01	0.0101	MFN2,NKX2-5,GATA4,PTEN
GO Process	GO:0048663	Neuron fate commitment	4	66	2023-05-01	0.0101	NOTCH3,SHH,SMAD4,PAX6
GO Process	GO:1902175	Regulation of oxidative stress-induced intrinsic apoptotic signaling pathway	3	27	1.31	0.0101	HTRA2,SOD1,PARK2
GO Process	GO:0021537	Telencephalon development	7	257	0.7	0.0103	SIX3,SHH,MCPH1,NF1,ASPM,PTEN,PAX6
GO Process	GO:0050678	Regulation of epithelial cell proliferation	8	339	0.64	0.0105	TINF2,SHH,NF1,MTOR,PTEN,AR,BRCA2,PAX6
GO Process	GO:1903201	Regulation of oxidative stress-induced cell death	4	67	2023-04-01	0.0106	HTRA2,SOD1,GATA4,PARK2
GO Process	GO:0048859	Formation of anatomical boundary	2	5	1.87	0.0107	SHH,SMAD4
GO Process	GO:0061734	Parkin-mediated stimulation of mitophagy in response to mitochondrial depolarization	2	5	1.87	0.0107	MFN2,PARK2
GO Process	GO:0010822	Positive regulation of mitochondrion organization	5	121	0.88	0.0108	MFN2,HTRA2,OPA1,PARK2,DNM1L
GO Process	GO:0048593	Camera-type eye morphogenesis	5	121	0.88	0.0108	MFN2,SIX3,LRP5,NF1,PAX6
GO Process	GO:0003338	Metanephros morphogenesis	3	28	2023-03-01	0.0109	FRAS1,WT1,GDNF
GO Process	GO:0043405	Regulation of map kinase activity	8	342	0.64	0.0109	SOD1,KIT,PPP2R1A,PTPN11,RET,ERCC6,NF1,GHR
GO Process	GO:1902742	Apoptotic process involved in development	3	28	2023-03-01	0.0109	SIX3,LRP5,NKX2-5
GO Process	GO:1905209	Positive regulation of cardiocyte differentiation	3	28	2023-03-01	0.0109	NKX2-5,GATA4,MTOR
GO Process	GO:0033036	Macromolecule localization	26	2473	0.29	0.0112	MFN2,SIX3,HERC2,TINF2,ATM,HNRNPU,SHH,TERT,FRAS1,MCPH1,ATR,ACTB,VCP,TGFBR2,PARK2,SYNE1,DKC1,STIL,ATRX,BRCA2,PDX1,GRIP1,DDX3X,PAX6,DNM1L,RPS19
GO Process	GO:2000377	Regulation of reactive oxygen species metabolic process	6	188	0.77	0.0114	SOD1,SLC18A2,TGFBR2,MTOR,PARK2,BRCA1
GO Process	GO:0009880	Embryonic pattern specification	4	69	2023-03-01	0.0115	SHH,WT1,SMAD4,STIL
GO Process	GO:0071456	Cellular response to hypoxia	6	189	0.77	0.0116	CREBBP,EP300,TERT,MTOR,OPA1,PTEN
GO Process	GO:0030511	Positive regulation of transforming growth factor beta receptor signaling pathway	3	29	1.28	0.0119	CREBBP,EP300,SMAD4
GO Process	GO:0034243	Regulation of transcription elongation from rna polymerase ii promoter	3	29	1.28	0.0119	CDK13,HNRNPU,SHH
GO Process	GO:1902115	Regulation of organelle assembly	6	191	0.76	0.0122	HNRNPU,SMAD4,CDK5RAP2,STIL,CENPJ,BRCA1
GO Process	GO:1901698	Response to nitrogen compound	15	1070	0.41	0.0123	APC,SOD1,LRP5,SLC18A2,WT1,ACTB,VCP,MTOR,OPA1,PARK2,PTEN,ATRX,PDX1,BRCA1,GHR
GO Process	GO:0045927	Positive regulation of growth	7	267	0.68	0.0124	CSNK2A1,WT1,TGFBR2,MTOR,PARK2,DDX3X,GHR
GO Process	GO:0001649	Osteoblast differentiation	5	127	0.86	0.0129	HNRNPU,LRP5,SHH,NF1,WWOX
GO Process	GO:0007143	Female meiotic nuclear division	3	30	1.27	0.0129	ATM,PPP2R1A,RAD51C
GO Process	GO:0030326	Embryonic limb morphogenesis	5	127	0.86	0.0129	CREBBP,LRP5,SHH,FRAS1,SMAD4
GO Process	GO:0033048	Negative regulation of mitotic sister chromatid segregation	3	30	1.27	0.0129	APC,ATM,ATRX
GO Process	GO:0007626	Locomotory behavior	6	194	0.76	0.0130	HTRA2,SOD1,SLC18A2,PARK2,PTEN,GDNF
GO Process	GO:0001570	Vasculogenesis	4	72	2023-01-01	0.0131	SHH,NKX2-5,WT1,TGFBR2
GO Process	GO:0002064	Epithelial cell development	6	195	0.75	0.0133	SIX3,SOD1,ATRX,AR,ASXL1,PAX6
GO Process	GO:0000019	Regulation of mitotic recombination	2	6	1.79	0.0136	MRE11A,RAD50
GO Process	GO:0003281	Ventricular septum development	4	73	1.0	0.0136	NKX2-5,GATA4,SMAD4,TGFBR2
GO Process	GO:0010821	Regulation of mitochondrion organization	6	196	0.75	0.0136	MFN2,HTRA2,EP300,OPA1,PARK2,DNM1L
GO Process	GO:0044089	Positive regulation of cellular component biogenesis	10	542	0.53	0.0136	APC,ATM,KIT,CDT1,ATR,CDK5RAP2,VCP,MTOR,CENPJ,DDX3X
GO Process	GO:0051891	Positive regulation of cardioblast differentiation	2	6	1.79	0.0136	NKX2-5,GATA4
GO Process	GO:0060685	Regulation of prostatic bud formation	2	6	1.79	0.0136	SHH,AR
GO Process	GO:0060923	Cardiac muscle cell fate commitment	2	6	1.79	0.0136	NKX2-5,WT1
GO Process	GO:0070842	Aggresome assembly	2	6	1.79	0.0136	VCP,PARK2
GO Process	GO:0072298	Regulation of metanephric glomerulus development	2	6	1.79	0.0136	WT1,RET
GO Process	GO:1903689	Regulation of wound healing, spreading of epidermal cells	2	6	1.79	0.0136	MTOR,PTEN
GO Process	GO:0010165	Response to x-ray	3	31	1.25	0.0137	ATM,ERCC6,BRCA2
GO Process	GO:0060325	Face morphogenesis	3	31	1.25	0.0137	EP300,ANKRD11,PTPN11
GO Process	GO:0060541	Respiratory system development	6	197	0.75	0.0137	PHOX2B,EP300,SHH,WT1,TGFBR2,ASXL1
GO Process	GO:0099003	Vesicle-mediated transport in synapse	5	130	0.85	0.0139	SLC18A2,ACTB,DNAJC6,GRIP1,DNM1L
GO Process	GO:1901699	Cellular response to nitrogen compound	11	645	0.5	0.0139	APC,SOD1,WT1,ACTB,MTOR,OPA1,PARK2,PTEN,ATRX,BRCA1,GHR
GO Process	GO:0001895	Retina homeostasis	4	74	1.0	0.0140	SOD1,ALB,ERCC6,ACTB
GO Process	GO:0006935	Chemotaxis	10	545	0.53	0.0140	NOTCH3,KIT,SHH,TUBB3,PTPN11,SMAD4,RET,PAX6,GDNF,RPS19
GO Process	GO:0043627	Response to estrogen	4	74	1.0	0.0140	EP300,KMT2D,TGFBR2,BRCA1
GO Process	GO:0060411	Cardiac septum morphogenesis	4	74	1.0	0.0140	NKX2-5,GATA4,SMAD4,TGFBR2
GO Process	GO:1901983	Regulation of protein acetylation	4	74	1.0	0.0140	SMAD4,DDX3X,BRCA1,KMT2A
GO Process	GO:0051493	Regulation of cytoskeleton organization	10	546	0.53	0.0141	APC,HNRNPU,SMAD4,MCPH1,CDK5RAP2,MTOR,PARK2,STIL,CENPJ,BRCA1
GO Process	GO:0000132	Establishment of mitotic spindle orientation	3	32	1.24	0.0146	MCPH1,CDK5RAP2,PAX6
GO Process	GO:0030334	Regulation of cell migration	13	865	0.44	0.0146	APC,ATM,KIT,MITF,SHH,TERT,RET,NF1,TGFBR2,MTOR,PTEN,PAX6,DNM1L
GO Process	GO:0044403	Symbiotic process	13	865	0.44	0.0146	CDK13,CREBBP,EP300,NBN,HNRNPU,MRE11A,VCP,PARK2,TDP2,RAD50,DDX3X,EIF3F,RPS19
GO Process	GO:0051146	Striated muscle cell differentiation	6	200	0.74	0.0146	HNRNPU,SHH,NKX2-5,WT1,GATA4,MTOR
GO Process	GO:0051234	Establishment of localization	39	4479	0.21	0.0148	CDK13,PROC,MFN2,SIX3,HERC2,SOD1,ATM,HNRNPU,KIT,ANO10,LRP5,ALB,SHH,SLC18A2,CDT1,TERT,FRAS1,MCPH1,ATR,CDK5RAP2,OCA2,ACTB,NF1,VCP,TGFBR2,SLC6A9,MICU1,OPA1,PSEN2,PARK2,DNAJC6,BRCA2,PDX1,GRIP1,DDX3X,PAX6,DNM1L,RPS19,GHR
GO Process	GO:0046425	Regulation of receptor signaling pathway via jak-stat	5	133	0.84	0.0150	KIT,PPP2R1A,RET,CENPJ,GHR
GO Process	GO:0033143	Regulation of intracellular steroid hormone receptor signaling pathway	4	76	0.99	0.0152	EP300,KMT2D,AR,BRCA1
GO Process	GO:0010243	Response to organonitrogen compound	14	987	0.42	0.0157	APC,SOD1,LRP5,SLC18A2,WT1,ACTB,VCP,MTOR,OPA1,PARK2,PTEN,PDX1,BRCA1,GHR
GO Process	GO:0035850	Epithelial cell differentiation involved in kidney development	3	33	1.22	0.0157	WT1,ASXL1,GDNF
GO Process	GO:0048872	Homeostasis of number of cells	6	204	0.73	0.0159	SOD1,KIT,FANCC,PTPN11,ASXL1,RPS19
GO Process	GO:0071901	Negative regulation of protein serine/threonine kinase activity	5	136	0.83	0.0163	APC,LRP5,PPP2R1A,NF1,PTEN
GO Process	GO:0003360	Brainstem development	2	7	1.72	0.0165	PHOX2B,SMAD4
GO Process	GO:0021798	Forebrain dorsal/ventral pattern formation	2	7	1.72	0.0165	SIX3,PAX6
GO Process	GO:0030174	Regulation of dna-dependent dna replication initiation	2	7	1.72	0.0165	NBN,CDT1
GO Process	GO:0036302	Atrioventricular canal development	2	7	1.72	0.0165	PTPN11,SMAD4
GO Process	GO:0060290	Transdifferentiation	2	7	1.72	0.0165	GATA4,PDX1
GO Process	GO:0060463	Lung lobe morphogenesis	2	7	1.72	0.0165	SHH,TGFBR2
GO Process	GO:0060998	Regulation of dendritic spine development	4	78	0.98	0.0165	MTOR,OPA1,PTEN,DNM1L
GO Process	GO:0032212	Positive regulation of telomere maintenance via telomerase	3	34	1.21	0.0166	ATM,ATR,DKC1
GO Process	GO:0046685	Response to arsenic-containing substance	3	34	1.21	0.0166	VCP,PTEN,DDX3X
GO Process	GO:0055026	Negative regulation of cardiac muscle tissue development	3	34	1.21	0.0166	SMAD4,TGFBR2,PTEN
GO Process	GO:1902105	Regulation of leukocyte differentiation	7	285	0.66	0.0166	SOD1,MITF,SHH,NF1,TGFBR2,MTOR,FANCA
GO Process	GO:0009749	Response to glucose	5	138	0.83	0.0170	GATA4,TGFBR2,OPA1,PTEN,PDX1
GO Process	GO:0010976	Positive regulation of neuron projection development	7	288	0.65	0.0175	EP300,RET,MTOR,OPA1,PARK2,GRIP1,DNM1L
GO Process	GO:0016032	Viral process	12	776	0.46	0.0175	CDK13,CREBBP,EP300,NBN,HNRNPU,MRE11A,VCP,TDP2,RAD50,DDX3X,EIF3F,RPS19
GO Process	GO:0010665	Regulation of cardiac muscle cell apoptotic process	3	35	2023-02-01	0.0178	NKX2-5,GATA4,PTEN
GO Process	GO:1905332	Positive regulation of morphogenesis of an epithelium	3	35	2023-02-01	0.0178	MTOR,AR,GDNF
GO Process	GO:0030855	Epithelial cell differentiation	11	673	0.48	0.0183	SIX3,SOD1,WT1,GATA4,SMAD4,ATRX,AR,ASXL1,PDX1,PAX6,GDNF
GO Process	GO:0060828	Regulation of canonical wnt signaling pathway	7	291	0.65	0.0183	APC,SHH,NKX2-5,VCP,PARK2,ASPM,DDX3X
GO Process	GO:0007050	Cell cycle arrest	5	141	0.82	0.0184	APC,NBN,ATM,MCPH1,MTOR
GO Process	GO:0043523	Regulation of neuron apoptotic process	6	212	0.72	0.0185	SOD1,ATM,TERT,NF1,PARK2,GDNF
GO Process	GO:0030521	Androgen receptor signaling pathway	3	36	1.19	0.0190	AR,GRIP1,BRCA1
GO Process	GO:0045652	Regulation of megakaryocyte differentiation	4	82	0.95	0.0190	SETD1A,EP300,KMT2D,KMT2A
GO Process	GO:0048645	Animal organ formation	3	36	1.19	0.0190	SHH,TGFBR2,AR
GO Process	GO:0061053	Somite development	4	82	0.95	0.0190	EP300,ATM,SHH,SMAD4
GO Process	GO:0003190	Atrioventricular valve formation	2	8	1.66	0.0196	GATA4,SMAD4
GO Process	GO:0009953	Dorsal/ventral pattern formation	4	83	0.95	0.0196	SIX3,SHH,PROP1,PAX6
GO Process	GO:0048312	Intracellular distribution of mitochondria	2	8	1.66	0.0196	OPA1,DNM1L
GO Process	GO:0048477	Oogenesis	4	83	0.95	0.0196	ATM,KMT2D,ASPM,BRCA2
GO Process	GO:0051177	Meiotic sister chromatid cohesion	2	8	1.66	0.0196	PPP2R1A,RAD51C
GO Process	GO:0060020	Bergmann glial cell differentiation	2	8	1.66	0.0196	SHH,PTPN11
GO Process	GO:0085020	Protein k6-linked ubiquitination	2	8	1.66	0.0196	PARK2,BRCA1
GO Process	GO:2000617	Positive regulation of histone h3-k9 acetylation	2	8	1.66	0.0196	SMAD4,BRCA1
GO Process	GO:0009411	Response to uv	5	144	0.81	0.0197	CREBBP,EP300,ATR,ERCC6,BRCA2
GO Process	GO:0072698	Protein localization to microtubule cytoskeleton	3	37	1.18	0.0200	HNRNPU,MCPH1,STIL
GO Process	GO:1902116	Negative regulation of organelle assembly	3	37	1.18	0.0200	SMAD4,CDK5RAP2,BRCA1
GO Process	GO:0010212	Response to ionizing radiation	5	145	0.8	0.0202	ATM,ATR,ERCC6,BRCA2,BRCA1
GO Process	GO:0030178	Negative regulation of wnt signaling pathway	6	218	0.71	0.0207	APC,SIX3,SHH,NKX2-5,PARK2,WWOX
GO Process	GO:0120035	Regulation of plasma membrane bounded cell projection organization	11	687	0.47	0.0207	APC,EP300,KIT,RET,MTOR,OPA1,PARK2,PTEN,CENPJ,GRIP1,DNM1L
GO Process	GO:0001894	Tissue homeostasis	6	219	0.7	0.0211	SOD1,ALB,ANKRD11,PTPN11,ERCC6,ACTB
GO Process	GO:0009791	Post-embryonic development	4	86	0.93	0.0217	ATM,SLC18A2,MTOR,ATRX
GO Process	GO:0007596	Blood coagulation	7	303	0.63	0.0221	PROC,MFN2,SHH,GATA4,RAD51C,PTPN11,ACTB
GO Process	GO:0051258	Protein polymerization	4	87	0.93	0.0225	TUBGCP6,PARK2,CENPJ,DNM1L
GO Process	GO:0071417	Cellular response to organonitrogen compound	10	590	0.5	0.0226	APC,SOD1,WT1,ACTB,MTOR,OPA1,PARK2,PTEN,BRCA1,GHR
GO Process	GO:0000578	Embryonic axis specification	3	39	1.15	0.0227	WT1,SMAD4,STIL
GO Process	GO:0002376	Immune system process	25	2481	0.27	0.0227	CDK13,CREBBP,EP300,NBN,SOD1,ATM,KIT,FANCC,LRP5,MITF,SHH,NKX2-5,PTPN11,RET,ACTB,VCP,TGFBR2,MTOR,ASXL1,BRCA2,CHD2,KAT6A,DDX3X,KMT2A,RPS19
GO Process	GO:0040019	Positive regulation of embryonic development	3	39	1.15	0.0227	SHH,AR,GDNF
GO Process	GO:0048599	Oocyte development	3	39	1.15	0.0227	ATM,KMT2D,BRCA2
GO Process	GO:0044057	Regulation of system process	10	592	0.49	0.0229	PHOX2B,SOD1,KIT,NKX2-5,GATA4,PTPN11,SMAD4,MYH7,MTOR,PTEN
GO Process	GO:0010637	Negative regulation of mitochondrial fusion	2	9	1.61	0.0230	PARK2,DNM1L
GO Process	GO:0046600	Negative regulation of centriole replication	2	9	1.61	0.0230	CDK5RAP2,BRCA1
GO Process	GO:0048539	Bone marrow development	2	9	1.61	0.0230	LRP5,ASXL1
GO Process	GO:0048617	Embryonic foregut morphogenesis	2	9	1.61	0.0230	SHH,GATA4
GO Process	GO:0051050	Positive regulation of transport	13	923	0.41	0.0232	HTRA2,SOD1,SHH,TERT,NKX2-5,PTPN11,SMAD4,ACTB,PARK2,PDX1,GDNF,KMT2A,DNM1L
GO Process	GO:0048713	Regulation of oligodendrocyte differentiation	3	40	1.14	0.0238	SHH,NF1,MTOR
GO Process	GO:0051494	Negative regulation of cytoskeleton organization	5	152	0.78	0.0239	APC,SMAD4,CDK5RAP2,PARK2,BRCA1
GO Process	GO:0051896	Regulation of protein kinase b signaling	6	226	0.69	0.0239	KIT,GATA4,PTPN11,RET,MTOR,PTEN
GO Process	GO:0034622	Cellular protein-containing complex assembly	12	816	0.43	0.0246	TUBGCP6,CDT1,SMAD4,PRMT7,PARK2,ATRX,CENPJ,KAT6A,TCF4,EIF3F,DNM1L,RPS19
GO Process	GO:0010717	Regulation of epithelial to mesenchymal transition	4	90	0.91	0.0247	SMAD4,TGFBR2,MTOR,PTEN
GO Process	GO:0051147	Regulation of muscle cell differentiation	5	154	0.78	0.0250	KIT,SHH,NKX2-5,SMAD4,MTOR
GO Process	GO:0033146	Regulation of intracellular estrogen receptor signaling pathway	3	41	1.13	0.0252	KMT2D,AR,BRCA1
GO Process	GO:0051651	Maintenance of location in cell	4	91	0.91	0.0255	HNRNPU,ALB,SYNE1,ASPM
GO Process	GO:0060021	Roof of mouth development	4	91	0.91	0.0255	SHH,FRAS1,SMAD4,TGFBR2
GO Process	GO:0071214	Cellular response to abiotic stimulus	7	313	0.62	0.0255	CREBBP,EP300,ATM,PTPN11,ATR,PTEN,DDX3X
GO Process	GO:0001505	Regulation of neurotransmitter levels	6	231	0.68	0.0262	SLC18A2,NF1,SLC6A9,PARK2,GDNF,DNM1L
GO Process	GO:2000045	Regulation of g1/s transition of mitotic cell cycle	5	156	0.77	0.0262	EP300,ATM,TERT,PTEN,DDX3X
GO Process	GO:0043473	Pigmentation	4	92	0.9	0.0264	KIT,MITF,OCA2,NF1
GO Process	GO:0002327	Immature b cell differentiation	2	10	1.57	0.0266	ATM,KIT
GO Process	GO:0036444	Calcium import into the mitochondrion	2	10	1.57	0.0266	MICU1,OPA1
GO Process	GO:0045792	Negative regulation of cell size	2	10	1.57	0.0266	MTOR,PTEN
GO Process	GO:0051418	Microtubule nucleation by microtubule organizing center	2	10	1.57	0.0266	TUBGCP6,CENPJ
GO Process	GO:0060412	Ventricular septum morphogenesis	3	42	2023-12-01	0.0266	NKX2-5,SMAD4,TGFBR2
GO Process	GO:0060443	Mammary gland morphogenesis	3	42	2023-12-01	0.0266	LRP5,TGFBR2,AR
GO Process	GO:1904036	Negative regulation of epithelial cell apoptotic process	3	42	2023-12-01	0.0266	TERT,MTOR,PDX1
GO Process	GO:2000144	Positive regulation of dna-templated transcription, initiation	3	42	2023-12-01	0.0266	MITF,NKX2-5,ERCC6
GO Process	GO:0048514	Blood vessel morphogenesis	8	410	0.56	0.0273	NOTCH3,LRP5,SHH,NKX2-5,WT1,NF1,TGFBR2,PTEN
GO Process	GO:0033260	Nuclear dna replication	3	43	2023-11-01	0.0278	CDT1,RTEL1,BRCA2
GO Process	GO:0060043	Regulation of cardiac muscle cell proliferation	3	43	2023-11-01	0.0278	NKX2-5,TGFBR2,PTEN
GO Process	GO:0031058	Positive regulation of histone modification	4	95	0.89	0.0288	ATM,SMAD4,BRCA1,KMT2A
GO Process	GO:0006468	Protein phosphorylation	13	952	0.4	0.0290	CDK13,CSNK2A1,ATM,KIT,ATR,RET,ERCC6,NF1,TGFBR2,MTOR,ADCK3,GDNF,GHR
GO Process	GO:0051235	Maintenance of location	5	161	0.76	0.0292	HNRNPU,ALB,SLC18A2,SYNE1,ASPM
GO Process	GO:0003197	Endocardial cushion development	3	44	2023-01-01	0.0294	GATA4,SMAD4,TGFBR2
GO Process	GO:0060999	Positive regulation of dendritic spine development	3	44	2023-01-01	0.0294	MTOR,OPA1,DNM1L
GO Process	GO:1901985	Positive regulation of protein acetylation	3	44	2023-01-01	0.0294	SMAD4,DDX3X,BRCA1
GO Process	GO:0006937	Regulation of muscle contraction	5	162	0.76	0.0297	SOD1,KIT,NKX2-5,GATA4,MYH7
GO Process	GO:0045945	Positive regulation of transcription by rna polymerase iii	2	11	1.53	0.0303	MTOR,AR
GO Process	GO:0046929	Negative regulation of neurotransmitter secretion	2	11	1.53	0.0303	NF1,PARK2
GO Process	GO:0051152	Positive regulation of smooth muscle cell differentiation	2	11	1.53	0.0303	KIT,SHH
GO Process	GO:0051657	Maintenance of organelle location	2	11	1.53	0.0303	ALB,ASPM
GO Process	GO:0060439	Trachea morphogenesis	2	11	1.53	0.0303	SHH,TGFBR2
GO Process	GO:0090657	Telomeric loop disassembly	2	11	1.53	0.0303	RTEL1,RECQL4
GO Process	GO:0035282	Segmentation	4	97	0.88	0.0304	EP300,ATM,WT1,SMAD4
GO Process	GO:0120162	Positive regulation of cold-induced thermogenesis	4	97	0.88	0.0304	PHOX2B,MFN2,APC,EHMT1
GO Process	GO:0043966	Histone h3 acetylation	3	45	2023-09-01	0.0307	BRCA2,BRPF1,KAT6A
GO Process	GO:0048255	mRNA stabilization	3	45	2023-09-01	0.0307	HNRNPU,MTOR,GDNF
GO Process	GO:0070925	Organelle assembly	11	735	0.44	0.0318	MFN2,TUBGCP6,SMC1A,PPP2R1A,NKX2-5,CDK5RAP2,ASPM,PTEN,CENPJ,DDX3X,RPS19
GO Process	GO:0035272	Exocrine system development	3	46	2023-08-01	0.0325	SHH,PDX1,PAX6
GO Process	GO:0090092	Regulation of transmembrane receptor protein serine/threonine kinase signaling pathway	6	244	0.66	0.0325	CREBBP,EP300,SHH,GATA4,SMAD4,TGFBR2
GO Process	GO:1905953	Negative regulation of lipid localization	3	46	2023-08-01	0.0325	SHH,PTPN11,ASXL1
GO Process	GO:2000241	Regulation of reproductive process	5	166	0.75	0.0325	SHH,PPP2R1A,WT1,ASPM,AR
GO Process	GO:0043409	Negative regulation of mapk cascade	5	168	0.74	0.0340	PPP2R1A,SMAD4,NF1,PARK2,PTEN
GO Process	GO:0008542	Visual learning	3	47	2023-07-01	0.0342	KIT,NF1,MTOR
GO Process	GO:0010718	Positive regulation of epithelial to mesenchymal transition	3	47	2023-07-01	0.0342	SMAD4,TGFBR2,MTOR
GO Process	GO:0045926	Negative regulation of growth	6	247	0.65	0.0342	PPP2R1A,WT1,SMAD4,TGFBR2,PTEN,DDX3X
GO Process	GO:1903202	Negative regulation of oxidative stress-induced cell death	3	47	2023-07-01	0.0342	HTRA2,GATA4,PARK2
GO Process	GO:0002065	Columnar/cuboidal epithelial cell differentiation	4	101	0.86	0.0343	SOD1,GATA4,PDX1,PAX6
GO Process	GO:0009408	Response to heat	4	101	0.86	0.0343	HTRA2,SOD1,NF1,VCP
GO Process	GO:0033148	Positive regulation of intracellular estrogen receptor signaling pathway	2	12	1.49	0.0343	KMT2D,AR
GO Process	GO:0044773	Mitotic dna damage checkpoint	4	101	0.86	0.0343	EP300,NBN,ATM,MRE11A
GO Process	GO:0072425	Signal transduction involved in g2 dna damage checkpoint	2	12	1.49	0.0343	ATM,BRCA1
GO Process	GO:2000105	Positive regulation of dna-dependent dna replication	2	12	1.49	0.0343	CDT1,ATRX
GO Process	GO:1901342	Regulation of vasculature development	7	336	0.58	0.0350	KIT,TERT,WT1,GATA4,NF1,TGFBR2,BRCA1
GO Process	GO:0051153	Regulation of striated muscle cell differentiation	4	102	0.86	0.0353	SHH,NKX2-5,SMAD4,MTOR
GO Process	GO:0006306	DNA methylation	3	48	2023-06-01	0.0356	PRMT7,ATRX,EHMT1
GO Process	GO:0048488	Synaptic vesicle endocytosis	3	48	2023-06-01	0.0356	ACTB,DNAJC6,DNM1L
GO Process	GO:0055010	Ventricular cardiac muscle tissue morphogenesis	3	48	2023-06-01	0.0356	NKX2-5,SMAD4,MYH7
GO Process	GO:0061001	Regulation of dendritic spine morphogenesis	3	48	2023-06-01	0.0356	OPA1,PTEN,DNM1L
GO Process	GO:0002521	Leukocyte differentiation	7	338	0.58	0.0357	EP300,ATM,KIT,MITF,SHH,TGFBR2,MTOR
GO Process	GO:0006897	Endocytosis	8	433	0.53	0.0357	LRP5,ALB,SHH,ACTB,TGFBR2,DNAJC6,DNM1L,GHR
GO Process	GO:0021543	Pallium development	5	171	0.73	0.0357	MCPH1,NF1,ASPM,PTEN,PAX6
GO Process	GO:0008593	Regulation of notch signaling pathway	4	103	0.86	0.0360	CREBBP,EP300,NOTCH3,KIT
GO Process	GO:0070201	Regulation of establishment of protein localization	10	642	0.46	0.0366	HTRA2,LRP5,SHH,PTPN11,NF1,PARK2,DKC1,PDX1,CENPJ,DNM1L
GO Process	GO:0045104	Intermediate filament cytoskeleton organization	3	49	2023-05-01	0.0371	SOD1,SHH,GFAP
GO Process	GO:0071407	Cellular response to organic cyclic compound	9	537	0.49	0.0371	SOD1,HNRNPU,WT1,ACTB,PARK2,AR,GRIP1,BRCA1,DNM1L
GO Process	GO:0090199	Regulation of release of cytochrome c from mitochondria	3	49	2023-05-01	0.0371	OPA1,PARK2,DNM1L
GO Process	GO:0120034	Positive regulation of plasma membrane bounded cell projection assembly	4	104	0.85	0.0371	APC,KIT,MTOR,CENPJ
GO Process	GO:1903829	Positive regulation of cellular protein localization	7	342	0.58	0.0377	APC,HTRA2,SHH,CDT1,TERT,PARK2,DKC1
GO Process	GO:2000058	Regulation of ubiquitin-dependent protein catabolic process	5	174	0.72	0.0379	CSNK2A1,SHH,VCP,PARK2,PTEN
GO Process	GO:0002320	Lymphoid progenitor cell differentiation	2	13	1.45	0.0383	KIT,SHH
GO Process	GO:0015872	Dopamine transport	2	13	1.45	0.0383	SLC18A2,PARK2
GO Process	GO:0019430	Removal of superoxide radicals	2	13	1.45	0.0383	SOD1,FANCC
GO Process	GO:0031274	Positive regulation of pseudopodium assembly	2	13	1.45	0.0383	APC,KIT
GO Process	GO:0034244	Negative regulation of transcription elongation from rna polymerase ii promoter	2	13	1.45	0.0383	HNRNPU,SHH
GO Process	GO:0043201	Response to leucine	2	13	1.45	0.0383	MTOR,PDX1
GO Process	GO:0051988	Regulation of attachment of spindle microtubules to kinetochore	2	13	1.45	0.0383	APC,HNRNPU
GO Process	GO:0045747	Positive regulation of notch signaling pathway	3	50	2023-04-01	0.0385	CREBBP,EP300,KIT
GO Process	GO:0000018	Regulation of dna recombination	4	106	0.84	0.0388	MRE11A,ERCC6,RTEL1,RAD50
GO Process	GO:2001022	Positive regulation of response to dna damage stimulus	4	106	0.84	0.0388	ATM,ATR,ERCC6,BRCA1
GO Process	GO:0043410	Positive regulation of mapk cascade	9	543	0.49	0.0389	SOD1,KIT,GATA4,PTPN11,RET,ERCC6,PTEN,AR,GHR
GO Process	GO:0048639	Positive regulation of developmental growth	5	176	0.72	0.0390	WT1,TGFBR2,MTOR,PARK2,GHR
GO Process	GO:2000027	Regulation of animal organ morphogenesis	6	257	0.63	0.0393	SHH,WT1,SMAD4,TGFBR2,AR,GDNF
GO Process	GO:0018105	Peptidyl-serine phosphorylation	5	177	0.72	0.0399	CSNK2A1,ATM,ATR,TGFBR2,MTOR
GO Process	GO:0050730	Regulation of peptidyl-tyrosine phosphorylation	6	258	0.63	0.0400	KIT,PPP2R1A,PTPN11,ERCC6,MTOR,GHR
GO Process	GO:0072332	Intrinsic apoptotic signaling pathway by p53 class mediator	3	51	2023-04-01	0.0401	EP300,BRCA2,WWOX
GO Process	GO:0071902	Positive regulation of protein serine/threonine kinase activity	7	348	0.57	0.0403	SOD1,KIT,PTPN11,RET,ERCC6,DDX3X,GHR
GO Process	GO:0007611	Learning or memory	6	259	0.63	0.0406	EP300,KIT,NF1,MTOR,PARK2,PTEN
GO Process	GO:0002262	Myeloid cell homeostasis	4	108	0.83	0.0409	SOD1,KIT,FANCC,RPS19
GO Process	GO:0051049	Regulation of transport	19	1776	0.3	0.0413	HTRA2,SOD1,LRP5,SHH,TERT,NKX2-5,PTPN11,SMAD4,ACTB,NF1,MTOR,PSEN2,PARK2,DNAJC6,PTEN,PDX1,GDNF,KMT2A,DNM1L
GO Process	GO:0003214	Cardiac left ventricle morphogenesis	2	14	1.42	0.0420	SMAD4,TGFBR2
GO Process	GO:0007512	Adult heart development	2	14	1.42	0.0420	NKX2-5,MYH7
GO Process	GO:0009948	Anterior/posterior axis specification	3	52	2023-03-01	0.0420	SHH,WT1,SMAD4
GO Process	GO:0021761	Limbic system development	4	109	0.83	0.0420	PROP1,NF1,SOX3,PTEN
GO Process	GO:0031648	Protein destabilization	3	52	2023-03-01	0.0420	CREBBP,EP300,PARK2
GO Process	GO:0032526	Response to retinoic acid	4	109	0.83	0.0420	HTRA2,ATM,RET,ASXL1
GO Process	GO:0043984	Histone h4-k16 acetylation	2	14	1.42	0.0420	KANSL1,KMT2A
GO Process	GO:0051547	Regulation of keratinocyte migration	2	14	1.42	0.0420	MTOR,PTEN
GO Process	GO:0090266	Regulation of mitotic cell cycle spindle assembly checkpoint	2	14	1.42	0.0420	CDT1,CDK5RAP2
GO Process	GO:0097237	Cellular response to toxic substance	4	109	0.83	0.0420	SOD1,FANCC,ALB,PARK2
GO Process	GO:1902916	Positive regulation of protein polyubiquitination	2	14	1.42	0.0420	PARK2,DDX3X
GO Process	GO:1904705	Regulation of vascular associated smooth muscle cell proliferation	3	52	2023-03-01	0.0420	MFN2,TERT,PTEN
GO Process	GO:1905330	Regulation of morphogenesis of an epithelium	5	180	0.71	0.0420	SHH,MTOR,PTEN,AR,GDNF
GO Process	GO:0071156	Regulation of cell cycle arrest	4	110	0.83	0.0426	PHOX2B,EP300,ATM,BRCA1
GO Process	GO:0090100	Positive regulation of transmembrane receptor protein serine/threonine kinase signaling pathway	4	110	0.83	0.0426	CREBBP,EP300,GATA4,SMAD4
GO Process	GO:0032835	Glomerulus development	3	53	2023-02-01	0.0432	NOTCH3,WT1,ASXL1
GO Process	GO:0090596	Sensory organ morphogenesis	6	264	0.62	0.0432	MFN2,SIX3,SOD1,LRP5,NF1,PAX6
GO Process	GO:0032101	Regulation of response to external stimulus	13	1013	0.37	0.0435	PROC,CREBBP,EP300,SOD1,ATM,PTPN11,MCPH1,TGFBR2,MTOR,PTEN,FANCA,DNM1L,RPS19
GO Process	GO:0006289	Nucleotide-excision repair	4	111	0.82	0.0437	EP300,FANCC,ERCC6,BRCA2
GO Process	GO:0021953	Central nervous system neuron differentiation	5	183	0.7	0.0440	PHOX2B,SHH,ZNF335,PTEN,PAX6
GO Process	GO:0021782	Glial cell development	4	112	0.82	0.0449	SOD1,SHH,NF1,PTEN
GO Process	GO:0051148	Negative regulation of muscle cell differentiation	3	54	2023-01-01	0.0450	SHH,NKX2-5,SMAD4
GO Process	GO:0051272	Positive regulation of cellular component movement	9	561	0.47	0.0459	APC,ATM,KIT,TERT,RET,TGFBR2,MTOR,DNM1L,RPS19
GO Process	GO:0070647	Protein modification by small protein conjugation or removal	13	1021	0.37	0.0461	APC,HERC2,EP300,SMAD4,ACTB,VCP,PARK2,PTEN,AR,ASXL1,FANCL,BRCA1,EIF3F
GO Process	GO:0006978	DNA damage response, signal transduction by p53 class mediator resulting in transcription of p21 class mediator	2	15	1.39	0.0462	BRCA2,BRCA1
GO Process	GO:0008053	Mitochondrial fusion	2	15	1.39	0.0462	MFN2,OPA1
GO Process	GO:0014733	Regulation of skeletal muscle adaptation	2	15	1.39	0.0462	MYH7,MTOR
GO Process	GO:0043369	CD4-positive or CD8-positive, alpha-beta T cell lineage commitment	2	15	1.39	0.0462	SHH,MTOR
GO Process	GO:0060044	Negative regulation of cardiac muscle cell proliferation	2	15	1.39	0.0462	TGFBR2,PTEN
GO Process	GO:0001819	Positive regulation of cytokine production	8	461	0.51	0.0476	CREBBP,EP300,SOD1,MRE11A,GATA4,PTPN11,DDX3X,BRCA1
GO Process	GO:0051091	Positive regulation of dna-binding transcription factor activity	6	271	0.61	0.0478	EP300,KIT,LRP5,SHH,PTEN,AR
GO Process	GO:0042593	Glucose homeostasis	5	188	0.69	0.0483	GATA4,PTPN11,OPA1,PDX1,PAX6
GO Process	GO:0060688	Regulation of morphogenesis of a branching structure	3	56	1.0	0.0487	SHH,AR,GDNF
GO Process	GO:1904018	Positive regulation of vasculature development	5	189	0.69	0.0492	KIT,TERT,GATA4,TGFBR2,BRCA1
GO Process	GO:0021987	Cerebral cortex development	4	116	0.8	0.0495	MCPH1,NF1,ASPM,PAX6
GO Molecular Function
GO Function	GO:0003677	DNA binding	48	2470	0.55	4.71e-13	CDK13,PHOX2B,SIX3,CREBBP,EP300,NBN,TINF2,FANCM,ATM,HNRNPU,MITF,ALB,CDT1,KMT2D,TERT,FANCI,PROP1,ZNF335,MRE11A,NKX2-5,WT1,GATA4,RAD51C,SMAD4,ATR,CDK5RAP2,ERCC6,RTEL1,MTOR,PARK2,SOX3,ATRX,AR,ASXL1,TDP2,FANCG,RAD50,BRCA2,PDX1,BRPF1,CHD2,KAT6A,TCF4,DDX3X,PAX6,BRCA1,KMT2A,RECQL4
GO Function	GO:0005515	Protein binding	80	7026	0.32	4.71e-13	CDK13,CSNK2A1,MFN2,TUBGCP6,APC,HTRA2,SIX3,HERC2,CREBBP,KANSL1,SETD1A,EP300,NOTCH3,NBN,SOD1,ATM,HNRNPU,KIT,LRP5,MITF,ALB,SHH,CDT1,KMT2D,TERT,FANCI,PROP1,TUBB3,SMC1A,PPP2R1A,MRE11A,NKX2-5,WT1,GATA4,PTPN11,SMAD4,MCPH1,PRMT7,CDK5RAP2,MYH7,ERCC6,ACTB,VCP,TGFBR2,RTEL1,MICU1,MTOR,OPA1,PARK2,SYNE1,ASPM,DNAJC6,STIL,PTEN,ATRX,HDAC8,AR,ASXL1,RAD50,BRCA2,PDX1,CENPJ,SACS,CHD2,KAT6A,GRIP1,TCF4,DDX3X,FANCL,PAX6…
GO Function	GO:0003676	Nucleic acid binding	55	3947	0.41	5.78e-10	CDK13,PHOX2B,SIX3,CREBBP,SETD1A,EP300,NBN,TINF2,FANCM,ATM,HNRNPU,MITF,ALB,CDT1,KMT2D,TERT,FANCI,PROP1,SMC1A,ZNF335,MRE11A,NKX2-5,WT1,GATA4,RAD51C,SMAD4,ATR,CDK5RAP2,ERCC6,VCP,RTEL1,MTOR,PARK2,SYNE1,DKC1,SOX3,ATRX,AR,ASXL1,TDP2,FANCG,RAD50,BRCA2,PDX1,BRPF1,CHD2,KAT6A,TCF4,DDX3X,PAX6,BRCA1,EIF3F,KMT2A,RPS19,RECQL4
GO Function	GO:0008134	Transcription factor binding	23	672	0.8	1.63e-09	CDK13,SIX3,CREBBP,SETD1A,EP300,NBN,HNRNPU,TERT,NKX2-5,GATA4,SMAD4,ACTB,MTOR,HDAC8,AR,ASXL1,PDX1,KAT6A,GRIP1,TCF4,DDX3X,PAX6,BRCA1
GO Function	GO:1901363	Heterocyclic compound binding	66	5831	0.32	3.68e-09	CDK13,CSNK2A1,PHOX2B,MFN2,SIX3,CREBBP,SETD1A,EP300,NBN,TINF2,FANCM,ATM,HNRNPU,KIT,MITF,ALB,CDT1,KMT2D,TERT,FANCI,PROP1,TUBB3,SMC1A,ZNF335,MRE11A,NKX2-5,WT1,GATA4,RAD51C,SMAD4,ATR,CDK5RAP2,MYH7,RET,ERCC6,ACTB,VCP,TGFBR2,RTEL1,MTOR,OPA1,ADCK3,PARK2,SYNE1,DKC1,SOX3,ATRX,AR,ASXL1,TDP2,FANCG,RAD50,BRCA2,PDX1,BRPF1,CHD2,KAT6A,TCF4,DDX3X,PAX6,BRCA1,EIF3F,KMT2A,DNM1L,RPS19,RECQL4
GO Function	GO:0005488	Binding	98	12516	0.16	5.75e-09	CDK13,CSNK2A1,PROKR2,PHOX2B,PROC,MFN2,TUBGCP6,APC,HTRA2,SIX3,HERC2,CREBBP,KANSL1,SETD1A,EP300,NOTCH3,NBN,TINF2,FANCM,SOD1,ATM,HNRNPU,KIT,LRP5,MITF,ALB,SHH,CDT1,KMT2D,TERT,FANCI,PROP1,TUBB3,SMC1A,PPP2R1A,ZNF335,MRE11A,FRAS1,NKX2-5,WT1,GATA4,RAD51C,PTPN11,SMAD4,MCPH1,PRMT7,ATR,CDK5RAP2,MYH7,RET,ERCC6,ACTB,NF1,VCP,TGFBR2,RTEL1,MICU1,MTOR,OPA1,ADCK3,PARK2,SYNE1,ASPM,DKC1,SOX3,DNAJC6,STIL,PTEN,ATRX,HD…
GO Function	GO:0097159	Organic cyclic compound binding	66	5916	0.31	5.75e-09	CDK13,CSNK2A1,PHOX2B,MFN2,SIX3,CREBBP,SETD1A,EP300,NBN,TINF2,FANCM,ATM,HNRNPU,KIT,MITF,ALB,CDT1,KMT2D,TERT,FANCI,PROP1,TUBB3,SMC1A,ZNF335,MRE11A,NKX2-5,WT1,GATA4,RAD51C,SMAD4,ATR,CDK5RAP2,MYH7,RET,ERCC6,ACTB,VCP,TGFBR2,RTEL1,MTOR,OPA1,ADCK3,PARK2,SYNE1,DKC1,SOX3,ATRX,AR,ASXL1,TDP2,FANCG,RAD50,BRCA2,PDX1,BRPF1,CHD2,KAT6A,TCF4,DDX3X,PAX6,BRCA1,EIF3F,KMT2A,DNM1L,RPS19,RECQL4
GO Function	GO:0003690	Double-stranded dna binding	27	1156	0.63	3.90e-08	CDK13,PHOX2B,SIX3,CREBBP,EP300,HNRNPU,MITF,KMT2D,PROP1,ZNF335,MRE11A,NKX2-5,WT1,GATA4,SMAD4,CDK5RAP2,MTOR,PARK2,SOX3,AR,RAD50,PDX1,CHD2,TCF4,PAX6,BRCA1,KMT2A
GO Function	GO:0000976	Transcription regulatory region sequence-specific dna binding	25	1028	0.65	8.80e-08	CDK13,PHOX2B,SIX3,CREBBP,EP300,HNRNPU,MITF,KMT2D,PROP1,ZNF335,NKX2-5,WT1,GATA4,SMAD4,CDK5RAP2,MTOR,PARK2,SOX3,AR,PDX1,CHD2,TCF4,PAX6,BRCA1,KMT2A
GO Function	GO:0043565	Sequence-specific dna binding	28	1331	0.59	1.23e-07	CDK13,PHOX2B,SIX3,CREBBP,EP300,TINF2,HNRNPU,MITF,KMT2D,TERT,PROP1,ZNF335,NKX2-5,WT1,GATA4,SMAD4,CDK5RAP2,MTOR,PARK2,SOX3,AR,RAD50,PDX1,CHD2,TCF4,PAX6,BRCA1,KMT2A
GO Function	GO:0019899	Enzyme binding	36	2239	0.47	2.54e-07	CDK13,MFN2,APC,SIX3,HERC2,KANSL1,NOTCH3,SOD1,HNRNPU,KIT,CDT1,FANCI,GATA4,PTPN11,CDK5RAP2,ERCC6,ACTB,VCP,TGFBR2,RTEL1,MTOR,OPA1,PARK2,SYNE1,PTEN,AR,BRCA2,CENPJ,FANCL,PAX6,GDNF,BRCA1,DNM1L,WWOX,RPS19,GHR
GO Function	GO:0042802	Identical protein binding	32	1896	0.49	8.94e-07	CSNK2A1,HTRA2,NOTCH3,SOD1,ATM,HNRNPU,KIT,ALB,TERT,MRE11A,NKX2-5,SMAD4,MCPH1,ACTB,VCP,MICU1,MTOR,PARK2,SYNE1,STIL,PTEN,RAD50,BRCA2,CENPJ,TCF4,GDNF,BRCA1,KMT2A,DNM1L,GFAP,RPS19,GHR
GO Function	GO:0140097	Catalytic activity, acting on dna	11	184	2023-04-01	1.81e-06	FANCM,TERT,MRE11A,RAD51C,RTEL1,DKC1,ATRX,TDP2,CHD2,DDX3X,RECQL4
GO Function	GO:0008013	Beta-catenin binding	8	86	1.23	8.35e-06	APC,SETD1A,EP300,PROP1,PARK2,AR,GRIP1,TCF4
GO Function	GO:0008094	DNA-dependent ATPase activity	8	93	2023-02-01	1.38e-05	FANCM,RAD51C,ERCC6,RTEL1,ATRX,CHD2,DDX3X,RECQL4
GO Function	GO:0003682	Chromatin binding	16	570	0.71	1.74e-05	CREBBP,EP300,FANCM,HNRNPU,MITF,CDT1,PROP1,SMC1A,NKX2-5,SMAD4,ERCC6,ATRX,AR,ASXL1,PDX1,PAX6
GO Function	GO:0140110	Transcription regulator activity	27	1657	0.48	3.13e-05	PHOX2B,SIX3,CREBBP,EP300,HNRNPU,MITF,KMT2D,PROP1,ZNF335,NKX2-5,WT1,GATA4,SMAD4,PARK2,SOX3,AR,ASXL1,TDP2,PDX1,CENPJ,KAT6A,GRIP1,TCF4,PAX6,BRCA1,KMT2A,WWOX
GO Function	GO:0000987	Cis-regulatory region sequence-specific dna binding	17	701	0.65	4.55e-05	PHOX2B,SIX3,CREBBP,EP300,HNRNPU,MITF,PROP1,ZNF335,NKX2-5,GATA4,SMAD4,MTOR,AR,PDX1,CHD2,TCF4,PAX6
GO Function	GO:0003712	Transcription coregulator activity	15	571	0.69	8.85e-05	SIX3,CREBBP,EP300,HNRNPU,KMT2D,GATA4,SMAD4,SOX3,ASXL1,TDP2,CENPJ,KAT6A,GRIP1,BRCA1,WWOX
GO Function	GO:0035639	Purine ribonucleoside triphosphate binding	27	1799	0.44	0.00013	CDK13,CSNK2A1,MFN2,FANCM,ATM,HNRNPU,KIT,TUBB3,SMC1A,RAD51C,ATR,MYH7,RET,ERCC6,ACTB,VCP,TGFBR2,RTEL1,MTOR,OPA1,ADCK3,ATRX,RAD50,CHD2,DDX3X,DNM1L,RECQL4
GO Function	GO:0043015	Gamma-tubulin binding	5	29	2023-05-01	0.00014	TUBGCP6,CDK5RAP2,BRCA2,CENPJ,DDX3X
GO Function	GO:0003713	Transcription coactivator activity	11	316	0.81	0.00021	SIX3,CREBBP,EP300,KMT2D,GATA4,ASXL1,CENPJ,KAT6A,GRIP1,BRCA1,WWOX
GO Function	GO:0003824	Catalytic activity	53	5486	0.25	0.00021	CDK13,CSNK2A1,PROC,MFN2,HTRA2,HERC2,CREBBP,SETD1A,EP300,FANCM,SOD1,ATM,KIT,SHH,KMT2D,TERT,TUBB3,PPP2R1A,MRE11A,RAD51C,PTPN11,PRMT7,ATR,MYH7,RET,ERCC6,VCP,TGFBR2,RTEL1,MTOR,OPA1,ADCK3,PSEN2,PARK2,DKC1,DNAJC6,PTEN,ATRX,HDAC8,TDP2,RAD50,BRCA2,CHD2,KAT6A,DDX3X,FANCL,EHMT1,BRCA1,EIF3F,KMT2A,DNM1L,WWOX,RECQL4
GO Function	GO:0032555	Purine ribonucleotide binding	27	1864	0.43	0.00022	CDK13,CSNK2A1,MFN2,FANCM,ATM,HNRNPU,KIT,TUBB3,SMC1A,RAD51C,ATR,MYH7,RET,ERCC6,ACTB,VCP,TGFBR2,RTEL1,MTOR,OPA1,ADCK3,ATRX,RAD50,CHD2,DDX3X,DNM1L,RECQL4
GO Function	GO:0003678	DNA helicase activity	6	63	1.25	0.00023	FANCM,RTEL1,ATRX,CHD2,DDX3X,RECQL4
GO Function	GO:0003684	Damaged dna binding	6	64	1.24	0.00024	CREBBP,EP300,NBN,FANCG,BRCA1,RECQL4
GO Function	GO:0044877	Protein-containing complex binding	21	1216	0.5	0.00024	APC,ATM,HNRNPU,SMC1A,PTPN11,SMAD4,PRMT7,ATR,MYH7,ERCC6,VCP,TGFBR2,MTOR,OPA1,PARK2,SYNE1,PTEN,PDX1,SACS,DDX3X,DNM1L
GO Function	GO:0019900	Kinase binding	16	742	0.6	0.00029	CDK13,APC,GATA4,PTPN11,CDK5RAP2,ACTB,TGFBR2,MTOR,OPA1,PARK2,PTEN,CENPJ,PAX6,GDNF,RPS19,GHR
GO Function	GO:0019901	Protein kinase binding	15	653	0.63	0.00029	CDK13,APC,GATA4,PTPN11,CDK5RAP2,ACTB,TGFBR2,MTOR,PARK2,PTEN,CENPJ,PAX6,GDNF,RPS19,GHR
GO Function	GO:0005524	ATP binding	23	1464	0.46	0.00032	CDK13,CSNK2A1,FANCM,ATM,HNRNPU,KIT,SMC1A,RAD51C,ATR,MYH7,RET,ERCC6,ACTB,VCP,TGFBR2,RTEL1,MTOR,ADCK3,ATRX,RAD50,CHD2,DDX3X,RECQL4
GO Function	GO:0000978	RNA polymerase II cis-regulatory region sequence-specific DNA binding	15	672	0.61	0.00038	PHOX2B,SIX3,EP300,HNRNPU,MITF,PROP1,ZNF335,NKX2-5,GATA4,SMAD4,AR,PDX1,CHD2,TCF4,PAX6
GO Function	GO:0043167	Ion binding	56	6188	0.22	0.00047	CDK13,CSNK2A1,PROC,MFN2,HERC2,CREBBP,EP300,NOTCH3,FANCM,SOD1,ATM,HNRNPU,KIT,ALB,SHH,KMT2D,TERT,TUBB3,SMC1A,ZNF335,MRE11A,FRAS1,WT1,GATA4,RAD51C,SMAD4,ATR,MYH7,RET,ERCC6,ACTB,NF1,VCP,TGFBR2,RTEL1,MICU1,MTOR,OPA1,ADCK3,PARK2,ATRX,HDAC8,AR,ASXL1,TDP2,RAD50,BRPF1,CHD2,KAT6A,DDX3X,FANCL,EHMT1,BRCA1,KMT2A,DNM1L,RECQL4
GO Function	GO:0016887	ATPase activity	11	393	0.71	0.00096	FANCM,RAD51C,MYH7,ERCC6,VCP,RTEL1,ATRX,RAD50,CHD2,DDX3X,RECQL4
GO Function	GO:0042054	Histone methyltransferase activity	5	50	1.27	0.00096	SETD1A,KMT2D,PRMT7,EHMT1,KMT2A
GO Function	GO:0098772	Molecular function regulator	37	3422	0.3	0.0011	PHOX2B,APC,SIX3,HERC2,CREBBP,EP300,HNRNPU,MITF,SHH,KMT2D,PROP1,PPP2R1A,ZNF335,NKX2-5,WT1,GATA4,SMAD4,ERCC6,NF1,VCP,PARK2,SOX3,AR,ASXL1,TDP2,PDX1,CENPJ,KAT6A,GRIP1,TCF4,DDX3X,PAX6,GDNF,BRCA1,KMT2A,DNM1L,WWOX
GO Function	GO:0008022	Protein c-terminus binding	8	199	0.87	0.0012	EP300,TERT,PROP1,MRE11A,ERCC6,BRCA2,GRIP1,TCF4
GO Function	GO:0097367	Carbohydrate derivative binding	28	2226	0.37	0.0012	CDK13,CSNK2A1,MFN2,FANCM,ATM,HNRNPU,KIT,SHH,TUBB3,SMC1A,RAD51C,ATR,MYH7,RET,ERCC6,ACTB,VCP,TGFBR2,RTEL1,MTOR,OPA1,ADCK3,ATRX,RAD50,CHD2,DDX3X,DNM1L,RECQL4
GO Function	GO:0001085	RNA polymerase II transcription factor binding	5	56	1.22	0.0013	CREBBP,EP300,GATA4,SMAD4,AR
GO Function	GO:0004386	Helicase activity	7	147	0.94	0.0013	FANCM,ERCC6,RTEL1,ATRX,CHD2,DDX3X,RECQL4
GO Function	GO:0017111	Nucleoside-triphosphatase activity	15	760	0.56	0.0013	MFN2,FANCM,TUBB3,RAD51C,MYH7,ERCC6,VCP,RTEL1,OPA1,ATRX,RAD50,CHD2,DDX3X,DNM1L,RECQL4
GO Function	GO:0140096	Catalytic activity, acting on a protein	27	2116	0.37	0.0013	CDK13,CSNK2A1,PROC,HTRA2,HERC2,SETD1A,ATM,KIT,SHH,KMT2D,PPP2R1A,PTPN11,PRMT7,ATR,RET,TGFBR2,MTOR,PSEN2,PARK2,DNAJC6,PTEN,HDAC8,FANCL,EHMT1,BRCA1,EIF3F,KMT2A
GO Function	GO:0000977	RNA polymerase II transcription regulatory region sequence-specific DNA binding	16	878	0.53	0.0015	PHOX2B,SIX3,EP300,HNRNPU,MITF,PROP1,ZNF335,NKX2-5,GATA4,SMAD4,SOX3,AR,PDX1,CHD2,TCF4,PAX6
GO Function	GO:0015631	Tubulin binding	10	361	0.71	0.0020	TUBGCP6,APC,CDK5RAP2,OPA1,PARK2,BRCA2,CENPJ,DDX3X,BRCA1,DNM1L
GO Function	GO:0001228	DNA-binding transcription activator activity, RNA polymerase II-specific	11	449	0.66	0.0023	PHOX2B,SIX3,MITF,PROP1,NKX2-5,WT1,GATA4,SMAD4,AR,TCF4,PAX6
GO Function	GO:0004402	Histone acetyltransferase activity	4	32	1.36	0.0023	CREBBP,EP300,BRCA2,KAT6A
GO Function	GO:0019904	Protein domain specific binding	14	716	0.56	0.0023	KIT,WT1,PTPN11,VCP,MTOR,PARK2,DNAJC6,PTEN,ATRX,AR,CENPJ,PAX6,EHMT1,DNM1L
GO Function	GO:0031625	Ubiquitin protein ligase binding	9	296	0.75	0.0023	MFN2,APC,HERC2,VCP,PARK2,FANCL,PAX6,BRCA1,DNM1L
GO Function	GO:0042800	Histone methyltransferase activity (h3-k4 specific)	3	10	1.74	0.0023	SETD1A,KMT2D,KMT2A
GO Function	GO:0018024	Histone-lysine n-methyltransferase activity	4	34	1.34	0.0027	SETD1A,KMT2D,EHMT1,KMT2A
GO Function	GO:0140296	General transcription initiation factor binding	4	41	1.26	0.0050	HNRNPU,MTOR,AR,TCF4
GO Function	GO:0000981	DNA-binding transcription factor activity, RNA polymerase II-specific	16	1022	0.46	0.0065	PHOX2B,SIX3,MITF,PROP1,ZNF335,NKX2-5,WT1,GATA4,SMAD4,PARK2,SOX3,AR,PDX1,TCF4,PAX6,KMT2A
GO Function	GO:0008270	Zinc ion binding	14	811	0.5	0.0065	HERC2,CREBBP,EP300,SOD1,ALB,SHH,WT1,GATA4,PARK2,AR,KAT6A,EHMT1,BRCA1,KMT2A
GO Function	GO:0008170	N-methyltransferase activity	5	87	2023-03-01	0.0066	SETD1A,KMT2D,PRMT7,EHMT1,KMT2A
GO Function	GO:0036094	Small molecule binding	28	2516	0.31	0.0066	CDK13,CSNK2A1,MFN2,FANCM,ATM,HNRNPU,KIT,ALB,TUBB3,SMC1A,RAD51C,ATR,MYH7,RET,ERCC6,ACTB,VCP,TGFBR2,RTEL1,MTOR,OPA1,ADCK3,ATRX,RAD50,CHD2,DDX3X,DNM1L,RECQL4
GO Function	GO:0043168	Anion binding	30	2805	0.3	0.0070	CDK13,CSNK2A1,MFN2,FANCM,ATM,HNRNPU,KIT,ALB,TUBB3,SMC1A,RAD51C,SMAD4,ATR,MYH7,RET,ERCC6,ACTB,NF1,VCP,TGFBR2,RTEL1,MTOR,OPA1,ADCK3,ATRX,RAD50,CHD2,DDX3X,DNM1L,RECQL4
GO Function	GO:0016787	Hydrolase activity	27	2419	0.31	0.0083	PROC,MFN2,HTRA2,FANCM,SHH,TUBB3,PPP2R1A,MRE11A,RAD51C,PTPN11,MYH7,ERCC6,VCP,RTEL1,OPA1,PSEN2,DNAJC6,PTEN,ATRX,HDAC8,TDP2,RAD50,CHD2,DDX3X,EIF3F,DNM1L,RECQL4
GO Function	GO:0070182	DNA polymerase binding	3	18	1.49	0.0084	CDT1,FANCI,RTEL1
GO Function	GO:0016740	Transferase activity	25	2170	0.33	0.0091	CDK13,CSNK2A1,HERC2,CREBBP,SETD1A,EP300,ATM,KIT,KMT2D,TERT,PRMT7,ATR,RET,TGFBR2,MTOR,ADCK3,PARK2,DKC1,RAD50,BRCA2,KAT6A,FANCL,EHMT1,BRCA1,KMT2A
GO Function	GO:0001091	RNA polymerase II general transcription initiation factor binding	3	19	1.46	0.0093	HNRNPU,AR,TCF4
GO Function	GO:0046914	Transition metal ion binding	16	1076	0.44	0.0100	HERC2,CREBBP,EP300,SOD1,ALB,SHH,MRE11A,WT1,GATA4,PARK2,AR,TDP2,KAT6A,EHMT1,BRCA1,KMT2A
GO Function	GO:0008092	Cytoskeletal protein binding	15	973	0.45	0.0108	TUBGCP6,APC,EP300,HNRNPU,CDK5RAP2,MYH7,ACTB,OPA1,PARK2,SYNE1,BRCA2,CENPJ,DDX3X,BRCA1,DNM1L
GO Function	GO:1990381	Ubiquitin-specific protease binding	3	21	1.42	0.0115	VCP,PARK2,PTEN
GO Function	GO:0051087	Chaperone binding	5	105	0.94	0.0128	SOD1,ALB,TERT,PARK2,SACS
GO Function	GO:0070034	Telomerase rna binding	3	22	2023-04-01	0.0128	HNRNPU,TERT,DKC1
GO Function	GO:0047485	Protein n-terminus binding	5	110	0.92	0.0153	CSNK2A1,NBN,ATM,TERT,ERCC6
GO Function	GO:0003720	Telomerase activity	2	4	1.97	0.0162	TERT,DKC1
GO Function	GO:0000217	DNA secondary structure binding	3	28	2023-03-01	0.0228	FANCM,KMT2A,RECQL4
GO Function	GO:0009378	Four-way junction helicase activity	2	6	1.79	0.0290	FANCM,RECQL4
GO Function	GO:0046332	SMAD binding	4	75	0.99	0.0319	GATA4,SMAD4,TGFBR2,PAX6
GO Function	GO:0140297	DNA-binding transcription factor binding	8	366	0.61	0.0340	CREBBP,EP300,GATA4,ACTB,ASXL1,GRIP1,TCF4,BRCA1
GO Function	GO:0061629	RNA polymerase II-specific DNA-binding transcription factor binding	7	283	0.66	0.0352	CREBBP,EP300,GATA4,ACTB,ASXL1,GRIP1,BRCA1
GO Function	GO:0002020	Protease binding	5	138	0.83	0.0371	KIT,VCP,PARK2,PTEN,BRCA2
GO Function	GO:0042162	Telomeric dna binding	3	36	1.19	0.0407	TINF2,TERT,RAD50
GO Function	GO:0008757	S-adenosylmethionine-dependent methyltransferase activity	5	144	0.81	0.0427	SETD1A,KMT2D,PRMT7,EHMT1,KMT2A
GO Function	GO:0042393	Histone binding	6	221	0.7	0.0477	KMT2D,PRMT7,ATRX,CHD2,KAT6A,KMT2A
GO Function	GO:0046983	Protein dimerization activity	14	1037	0.4	0.0497	KIT,MITF,TERT,SMC1A,PPP2R1A,NKX2-5,SMAD4,MICU1,SYNE1,TCF4,GDNF,KMT2A,DNM1L,GHR
GO Cellular component
GO Component	GO:0031981	Nuclear lumen	73	4733	0.45	8.71e-19	CDK13,CSNK2A1,PHOX2B,APC,SIX3,HERC2,CREBBP,KANSL1,SETD1A,EP300,NOTCH3,NBN,TINF2,FANCM,SOD1,ATM,HNRNPU,KIT,FANCC,MITF,CDT1,ANKRD11,KMT2D,TERT,FANCI,PROP1,SMC1A,ZNF335,MRE11A,NKX2-5,WT1,GATA4,RAD51C,PTPN11,SMAD4,MCPH1,PRMT7,ATR,ERCC6,ACTB,NF1,VCP,RTEL1,MTOR,OPA1,PARK2,SYNE1,DKC1,SOX3,PTEN,ATRX,HDAC8,AR,ASXL1,TDP2,FANCG,RAD50,BRCA2,PDX1,CENPJ,BRPF1,FANCA,CHD2,KAT6A,TCF4,DDX3X,FANCL,PAX6,EHMT1,BRCA1,…
GO Component	GO:0005654	Nucleoplasm	67	3973	0.49	1.24e-18	CDK13,CSNK2A1,PHOX2B,APC,HERC2,CREBBP,KANSL1,SETD1A,EP300,NOTCH3,NBN,TINF2,FANCM,SOD1,ATM,HNRNPU,FANCC,MITF,CDT1,ANKRD11,KMT2D,TERT,FANCI,SMC1A,ZNF335,MRE11A,WT1,GATA4,RAD51C,PTPN11,SMAD4,MCPH1,PRMT7,ATR,ERCC6,ACTB,VCP,RTEL1,MTOR,OPA1,PARK2,SYNE1,DKC1,SOX3,PTEN,ATRX,HDAC8,AR,ASXL1,TDP2,FANCG,RAD50,BRCA2,PDX1,CENPJ,BRPF1,FANCA,CHD2,KAT6A,DDX3X,FANCL,PAX6,EHMT1,BRCA1,KMT2A,WWOX,RPS19
GO Component	GO:0043232	Intracellular non-membrane-bounded organelle	72	4880	0.44	1.24e-17	CDK13,CSNK2A1,PHOX2B,MFN2,TUBGCP6,APC,HTRA2,SIX3,HERC2,CREBBP,KANSL1,SETD1A,EP300,NOTCH3,NBN,TINF2,ATM,HNRNPU,KIT,MITF,SLC18A2,CDT1,TERT,PROP1,TUBB3,SMC1A,PPP2R1A,MRE11A,NKX2-5,WT1,GATA4,RAD51C,SMAD4,MCPH1,PRMT7,ATR,CDK5RAP2,MYH7,ERCC6,ACTB,NF1,VCP,RTEL1,OPA1,PSEN2,SYNE1,ASPM,DKC1,SOX3,STIL,ATRX,HDAC8,AR,TDP2,FANCG,RAD50,BRCA2,PDX1,CENPJ,BRPF1,CHD2,KAT6A,TCF4,DDX3X,PAX6,EHMT1,BRCA1,DNM1L,GFAP,RPS…
GO Component	GO:0070013	Intracellular organelle lumen	78	5857	0.39	1.24e-17	CDK13,CSNK2A1,PHOX2B,PROC,APC,HTRA2,SIX3,HERC2,CREBBP,KANSL1,SETD1A,EP300,NOTCH3,NBN,TINF2,FANCM,SOD1,ATM,HNRNPU,KIT,FANCC,MITF,ALB,SHH,CDT1,ANKRD11,KMT2D,TERT,FANCI,PROP1,SMC1A,ZNF335,MRE11A,NKX2-5,WT1,GATA4,RAD51C,PTPN11,SMAD4,MCPH1,PRMT7,ATR,ERCC6,ACTB,NF1,VCP,RTEL1,MICU1,MTOR,OPA1,PARK2,SYNE1,DKC1,SOX3,PTEN,ATRX,HDAC8,AR,ASXL1,TDP2,FANCG,RAD50,BRCA2,PDX1,CENPJ,BRPF1,FANCA,CHD2,KAT6A,TCF4,DDX3…
GO Component	GO:0005694	Chromosome	44	1712	0.68	4.77e-17	CDK13,CSNK2A1,PHOX2B,APC,HTRA2,SIX3,CREBBP,KANSL1,SETD1A,EP300,NBN,TINF2,HNRNPU,MITF,CDT1,TERT,PROP1,SMC1A,PPP2R1A,MRE11A,NKX2-5,GATA4,RAD51C,SMAD4,ATR,ERCC6,ACTB,VCP,RTEL1,PSEN2,SOX3,ATRX,HDAC8,AR,RAD50,BRCA2,PDX1,BRPF1,KAT6A,TCF4,PAX6,EHMT1,BRCA1,RECQL4
GO Component	GO:0005634	Nucleus	81	7390	0.31	1.41e-13	CDK13,CSNK2A1,PHOX2B,APC,HTRA2,SIX3,HERC2,CREBBP,KANSL1,SETD1A,EP300,NOTCH3,NBN,TINF2,FANCM,SOD1,ATM,HNRNPU,KIT,FANCC,MITF,ALB,CDT1,ANKRD11,KMT2D,TERT,FANCI,PROP1,TUBB3,SMC1A,PPP2R1A,ZNF335,MRE11A,NKX2-5,WT1,GATA4,RAD51C,PTPN11,SMAD4,MCPH1,PRMT7,ATR,ERCC6,ACTB,NF1,VCP,RTEL1,MTOR,OPA1,PSEN2,PARK2,SYNE1,ASPM,DKC1,SOX3,PTEN,ATRX,HDAC8,AR,ASXL1,TDP2,FANCG,RAD50,BRCA2,PDX1,CENPJ,SACS,BRPF1,FANCA,CHD2,…
GO Component	GO:0032991	Protein-containing complex	67	5073	0.39	1.76e-13	CDK13,CSNK2A1,TUBGCP6,APC,HTRA2,SIX3,CREBBP,KANSL1,SETD1A,EP300,NOTCH3,NBN,TINF2,FANCM,SOD1,ATM,HNRNPU,KIT,FANCC,LRP5,MITF,ALB,KMT2D,TERT,PROP1,SMC1A,PPP2R1A,ZNF335,MRE11A,NKX2-5,GATA4,RAD51C,PTPN11,SMAD4,MYH7,RET,ERCC6,ACTB,VCP,TGFBR2,MICU1,MTOR,PSEN2,PARK2,SYNE1,DKC1,SOX3,HDAC8,AR,ASXL1,FANCG,RAD50,BRCA2,CENPJ,BRPF1,FANCA,KAT6A,TCF4,DDX3X,FANCL,BRCA1,EIF3F,KMT2A,DNM1L,WWOX,RPS19,GHR
GO Component	GO:0043229	Intracellular organelle	102	12528	0.18	2.80e-13	CDK13,CSNK2A1,PHOX2B,PROC,MFN2,TUBGCP6,APC,HTRA2,SIX3,HERC2,CREBBP,KANSL1,SETD1A,EP300,NOTCH3,NBN,TINF2,FANCM,SOD1,ATM,HNRNPU,KIT,FANCC,ANO10,LRP5,MITF,ALB,SHH,SLC18A2,CDT1,ANKRD11,KMT2D,TERT,FANCI,PROP1,TUBB3,SMC1A,PPP2R1A,ZNF335,MRE11A,NKX2-5,WT1,GATA4,RAD51C,PTPN11,SMAD4,MCPH1,PRMT7,ATR,CDK5RAP2,OCA2,MYH7,RET,ERCC6,ACTB,NF1,VCP,RTEL1,SLC6A9,MICU1,MTOR,OPA1,ADCK3,PSEN2,PARK2,SYNE1,ASPM,DKC1,SOX…
GO Component	GO:0043231	Intracellular membrane-bounded organelle	94	10761	0.21	1.13e-11	CDK13,CSNK2A1,PHOX2B,PROC,MFN2,APC,HTRA2,SIX3,HERC2,CREBBP,KANSL1,SETD1A,EP300,NOTCH3,NBN,TINF2,FANCM,SOD1,ATM,HNRNPU,KIT,FANCC,ANO10,LRP5,MITF,ALB,SHH,SLC18A2,CDT1,ANKRD11,KMT2D,TERT,FANCI,PROP1,TUBB3,SMC1A,PPP2R1A,ZNF335,MRE11A,NKX2-5,WT1,GATA4,RAD51C,PTPN11,SMAD4,MCPH1,PRMT7,ATR,CDK5RAP2,OCA2,ERCC6,ACTB,NF1,VCP,RTEL1,MICU1,MTOR,OPA1,ADCK3,PSEN2,PARK2,SYNE1,ASPM,DKC1,SOX3,DNAJC6,PTEN,ATRX,HDAC8…
GO Component	GO:0005622	Intracellular	104	14276	0.13	3.30e-10	CDK13,CSNK2A1,PHOX2B,PROC,MFN2,TUBGCP6,APC,HTRA2,SIX3,HERC2,CREBBP,KANSL1,SETD1A,EP300,NOTCH3,NBN,TINF2,FANCM,SOD1,ATM,HNRNPU,KIT,FANCC,ANO10,LRP5,MITF,ALB,SHH,SLC18A2,CDT1,ANKRD11,KMT2D,TERT,FANCI,PROP1,TUBB3,SMC1A,PPP2R1A,ZNF335,MRE11A,NKX2-5,WT1,GATA4,RAD51C,PTPN11,SMAD4,MCPH1,PRMT7,ATR,CDK5RAP2,OCA2,MYH7,RET,ERCC6,ACTB,NF1,VCP,TGFBR2,RTEL1,SLC6A9,MICU1,MTOR,OPA1,ADCK3,PSEN2,PARK2,SYNE1,ASPM,D…
GO Component	GO:0016604	Nuclear body	24	789	0.75	7.80e-10	CDK13,CREBBP,SETD1A,NBN,TINF2,HNRNPU,CDT1,TERT,MRE11A,WT1,GATA4,ATR,MTOR,PARK2,DKC1,PTEN,ATRX,AR,TDP2,PDX1,KAT6A,FANCL,EHMT1,BRCA1
GO Component	GO:0000228	Nuclear chromosome	29	1256	0.63	2.26e-09	CDK13,CSNK2A1,PHOX2B,SIX3,CREBBP,SETD1A,NBN,TINF2,HNRNPU,MITF,TERT,PROP1,SMC1A,MRE11A,NKX2-5,GATA4,SMAD4,ACTB,SOX3,ATRX,HDAC8,AR,RAD50,BRCA2,PDX1,KAT6A,TCF4,PAX6,BRCA1
GO Component	GO:0098687	Chromosomal region	16	318	0.97	3.09e-09	APC,KANSL1,NBN,TINF2,HNRNPU,CDT1,TERT,SMC1A,PPP2R1A,MRE11A,RTEL1,PSEN2,ATRX,RAD50,BRCA2,RECQL4
GO Component	GO:0043227	Membrane-bounded organelle	97	12427	0.16	3.51e-09	CDK13,CSNK2A1,PHOX2B,PROC,MFN2,APC,HTRA2,SIX3,HERC2,CREBBP,KANSL1,SETD1A,EP300,NOTCH3,NBN,TINF2,FANCM,SOD1,ATM,HNRNPU,KIT,FANCC,ANO10,LRP5,MITF,ALB,SHH,SLC18A2,CDT1,ANKRD11,KMT2D,TERT,FANCI,PROP1,TUBB3,SMC1A,PPP2R1A,ZNF335,MRE11A,NKX2-5,WT1,GATA4,RAD51C,PTPN11,SMAD4,MCPH1,PRMT7,ATR,CDK5RAP2,OCA2,RET,ERCC6,ACTB,NF1,VCP,RTEL1,SLC6A9,MICU1,MTOR,OPA1,ADCK3,PSEN2,PARK2,SYNE1,ASPM,DKC1,SOX3,DNAJC6,PTEN…
GO Component	GO:0016605	PML body	9	101	1.22	7.17e-07	NBN,TERT,MRE11A,ATR,MTOR,PTEN,ATRX,TDP2,KAT6A
GO Component	GO:0043240	Fanconi anaemia nuclear complex	5	13	1.85	2.84e-06	FANCM,FANCC,FANCG,FANCA,FANCL
GO Component	GO:0000781	Chromosome, telomeric region	9	134	2023-09-01	6.43e-06	NBN,TINF2,TERT,MRE11A,RTEL1,ATRX,RAD50,BRCA2,RECQL4
GO Component	GO:0005829	Cytosol	53	5193	0.28	1.89e-05	CDK13,CSNK2A1,MFN2,TUBGCP6,APC,HTRA2,HERC2,EP300,NOTCH3,NBN,SOD1,FANCC,SHH,CDT1,ANKRD11,TERT,FANCI,SMC1A,PPP2R1A,MRE11A,WT1,RAD51C,PTPN11,SMAD4,PRMT7,CDK5RAP2,ACTB,NF1,VCP,TGFBR2,MTOR,OPA1,PARK2,DNAJC6,STIL,PTEN,AR,FANCG,BRCA2,PDX1,CENPJ,BRPF1,KAT6A,GRIP1,DDX3X,PAX6,EIF3F,KMT2A,DNM1L,WWOX,GFAP,RPS19,GHR
GO Component	GO:0015630	Microtubule cytoskeleton	22	1219	0.52	4.53e-05	MFN2,TUBGCP6,APC,HERC2,ATM,HNRNPU,SLC18A2,TUBB3,SMC1A,PPP2R1A,SMAD4,MCPH1,CDK5RAP2,OPA1,PSEN2,ASPM,STIL,BRCA2,CENPJ,DDX3X,BRCA1,DNM1L
GO Component	GO:0000790	Nuclear chromatin	20	1048	0.55	6.62e-05	CDK13,CSNK2A1,PHOX2B,SIX3,CREBBP,SETD1A,MITF,PROP1,NKX2-5,GATA4,SMAD4,ACTB,SOX3,ATRX,AR,RAD50,PDX1,KAT6A,TCF4,PAX6
GO Component	GO:0000784	Nuclear chromosome, telomeric region	7	102	2023-01-01	0.00014	NBN,TINF2,TERT,MRE11A,ATRX,RAD50,BRCA2
GO Component	GO:0000785	Chromatin	21	1220	0.5	0.00016	CDK13,CSNK2A1,PHOX2B,HTRA2,SIX3,CREBBP,SETD1A,MITF,PROP1,NKX2-5,GATA4,SMAD4,ACTB,SOX3,ATRX,AR,RAD50,PDX1,KAT6A,TCF4,PAX6
GO Component	GO:0030870	Mre11 complex	3	3	2.27	0.00019	NBN,MRE11A,RAD50
GO Component	GO:0000123	Histone acetyltransferase complex	6	83	1.13	0.00052	CREBBP,KANSL1,EP300,ACTB,BRPF1,KAT6A
GO Component	GO:1902494	Catalytic complex	21	1328	0.47	0.00052	CDK13,CSNK2A1,HTRA2,CREBBP,KANSL1,SETD1A,EP300,HNRNPU,KMT2D,TERT,PPP2R1A,ZNF335,ACTB,VCP,PARK2,DKC1,HDAC8,BRPF1,KAT6A,BRCA1,KMT2A
GO Component	GO:0000775	Chromosome, centromeric region	8	193	0.88	0.00075	APC,KANSL1,HNRNPU,CDT1,SMC1A,PPP2R1A,PSEN2,ATRX
GO Component	GO:0005737	Cytoplasm	83	11428	0.13	0.00075	CDK13,CSNK2A1,PROC,MFN2,TUBGCP6,APC,HTRA2,HERC2,CREBBP,EP300,NOTCH3,NBN,SOD1,ATM,HNRNPU,KIT,FANCC,LRP5,ALB,SHH,SLC18A2,CDT1,ANKRD11,TERT,FANCI,TUBB3,SMC1A,PPP2R1A,MRE11A,NKX2-5,WT1,RAD51C,PTPN11,SMAD4,MCPH1,PRMT7,ATR,CDK5RAP2,OCA2,MYH7,RET,ACTB,NF1,VCP,TGFBR2,SLC6A9,MICU1,MTOR,OPA1,ADCK3,PSEN2,PARK2,SYNE1,ASPM,DKC1,DNAJC6,STIL,PTEN,HDAC8,AR,TDP2,FANCG,BRCA2,PDX1,CENPJ,SACS,BRPF1,FANCA,KAT6A,GRIP1…
GO Component	GO:0005856	Cytoskeleton	28	2221	0.37	0.00082	MFN2,TUBGCP6,APC,HTRA2,HERC2,NOTCH3,ATM,HNRNPU,SLC18A2,TUBB3,SMC1A,PPP2R1A,SMAD4,MCPH1,CDK5RAP2,MYH7,ACTB,OPA1,PSEN2,SYNE1,ASPM,STIL,BRCA2,CENPJ,DDX3X,BRCA1,DNM1L,GFAP
GO Component	GO:0005815	Microtubule organizing center	15	761	0.56	0.00085	TUBGCP6,APC,HERC2,HNRNPU,SLC18A2,SMAD4,MCPH1,CDK5RAP2,PSEN2,ASPM,STIL,BRCA2,CENPJ,DDX3X,BRCA1
GO Component	GO:0000793	Condensed chromosome	8	216	0.83	0.0014	KANSL1,HNRNPU,CDT1,SMC1A,ATRX,RAD50,BRCA2,BRCA1
GO Component	GO:0110165	Cellular anatomical entity	106	17788	0.04	0.0019	CDK13,CSNK2A1,PROKR2,PHOX2B,PROC,MFN2,TUBGCP6,APC,HTRA2,SIX3,HERC2,CREBBP,KANSL1,SETD1A,EP300,NOTCH3,NBN,TINF2,FANCM,SOD1,ATM,HNRNPU,KIT,FANCC,ANO10,LRP5,MITF,ALB,SHH,SLC18A2,CDT1,ANKRD11,KMT2D,TERT,FANCI,PROP1,TUBB3,SMC1A,PPP2R1A,ZNF335,MRE11A,FRAS1,NKX2-5,WT1,GATA4,RAD51C,PTPN11,SMAD4,MCPH1,PRMT7,ATR,CDK5RAP2,OCA2,MYH7,RET,ERCC6,ACTB,NF1,VCP,TGFBR2,RTEL1,SLC6A9,MICU1,MTOR,OPA1,ADCK3,PSEN2,PARK2…
GO Component	GO:0099080	Supramolecular complex	19	1261	0.44	0.0022	TUBGCP6,APC,KANSL1,HNRNPU,CDT1,TUBB3,SMC1A,CDK5RAP2,MYH7,ACTB,VCP,PSEN2,SYNE1,ASPM,CENPJ,DDX3X,DNM1L,GFAP,GHR
GO Component	GO:1990234	Transferase complex	14	752	0.54	0.0027	CDK13,CREBBP,KANSL1,SETD1A,EP300,KMT2D,TERT,ZNF335,ACTB,PARK2,BRPF1,KAT6A,BRCA1,KMT2A
GO Component	GO:0005813	Centrosome	12	565	0.59	0.0028	TUBGCP6,APC,HNRNPU,SLC18A2,SMAD4,CDK5RAP2,PSEN2,ASPM,STIL,BRCA2,CENPJ,DDX3X
GO Component	GO:0035097	Histone methyltransferase complex	5	74	2023-01-01	0.0028	KANSL1,SETD1A,KMT2D,ZNF335,KMT2A
GO Component	GO:0090734	Site of dna damage	5	82	2023-05-01	0.0043	NBN,MRE11A,ERCC6,VCP,RAD50
GO Component	GO:0000776	Kinetochore	6	134	0.92	0.0044	APC,KANSL1,HNRNPU,CDT1,SMC1A,PSEN2
GO Component	GO:0000930	Gamma-tubulin complex	3	16	1.54	0.0052	TUBGCP6,CENPJ,BRCA1
GO Component	GO:0005667	Transcription regulator complex	10	431	0.63	0.0052	CSNK2A1,SIX3,EP300,PROP1,NKX2-5,GATA4,SMAD4,SOX3,TCF4,WWOX
GO Component	GO:0030425	Dendrite	12	612	0.56	0.0052	SOD1,HNRNPU,TUBB3,PPP2R1A,RET,NF1,MTOR,OPA1,PSEN2,PTEN,SACS,GRIP1
GO Component	GO:0005730	Nucleolus	15	924	0.48	0.0054	NBN,ATM,KIT,TERT,WT1,PRMT7,ERCC6,NF1,SYNE1,DKC1,TDP2,FANCG,CHD2,KAT6A,RPS19
GO Component	GO:0005697	Telomerase holoenzyme complex	3	20	1.44	0.0086	HNRNPU,TERT,DKC1
GO Component	GO:0000794	Condensed nuclear chromosome	5	103	0.95	0.0099	SMC1A,ATRX,RAD50,BRCA2,BRCA1
GO Component	GO:0016607	Nuclear speck	9	399	0.62	0.0118	CDK13,SETD1A,HNRNPU,TERT,WT1,PARK2,AR,PDX1,KAT6A
GO Component	GO:0035861	Site of double-strand break	4	60	2023-09-01	0.0127	NBN,MRE11A,VCP,RAD50
GO Component	GO:0097431	Mitotic spindle pole	3	25	1.35	0.0142	SMC1A,CDK5RAP2,ASPM
GO Component	GO:0000779	Condensed chromosome, centromeric region	5	120	0.89	0.0179	KANSL1,HNRNPU,CDT1,SMC1A,ATRX
GO Component	GO:0008274	Gamma-tubulin ring complex	2	7	1.72	0.0306	TUBGCP6,BRCA1
GO Component	GO:0070776	MOZ/MORF histone acetyltransferase complex	2	7	1.72	0.0306	BRPF1,KAT6A
GO Component	GO:0005758	Mitochondrial intermembrane space	4	81	0.96	0.0332	HTRA2,SOD1,MICU1,OPA1
GO Component	GO:0005874	Microtubule	8	407	0.56	0.0492	TUBGCP6,APC,HNRNPU,TUBB3,CDK5RAP2,ASPM,CENPJ,DNM1L
GO Component	GO:0036464	Cytoplasmic ribonucleoprotein granule	6	231	0.68	0.0492	HNRNPU,ACTB,VCP,SYNE1,DDX3X,GHR
GO Component	GO:0099512	Supramolecular fiber	13	939	0.41	0.0492	TUBGCP6,APC,HNRNPU,TUBB3,CDK5RAP2,MYH7,ACTB,PSEN2,SYNE1,ASPM,CENPJ,DNM1L,GFAP
Reactome
Reactome	HSA-73894	DNA Repair	22	309	2023-12-01	8.68e-15	HERC2,EP300,NBN,TINF2,FANCM,ATM,FANCC,FANCI,MRE11A,RAD51C,ATR,ERCC6,ACTB,VCP,RTEL1,TDP2,FANCG,RAD50,BRCA2,FANCA,FANCL,BRCA1
Reactome	HSA-1640170	Cell Cycle	26	647	0.87	1.58e-12	CSNK2A1,TUBGCP6,HERC2,EP300,NBN,TINF2,ATM,CDT1,TERT,TUBB3,SMC1A,PPP2R1A,MRE11A,RAD51C,MCPH1,ATR,CDK5RAP2,RTEL1,SYNE1,DKC1,ATRX,HDAC8,RAD50,BRCA2,CENPJ,BRCA1
Reactome	HSA-212436	Generic Transcription Pathway	31	1197	0.68	1.33e-10	CDK13,CSNK2A1,CREBBP,SETD1A,EP300,NOTCH3,NBN,ATM,KIT,FANCC,KMT2D,FANCI,PPP2R1A,MRE11A,NKX2-5,GATA4,PTPN11,SMAD4,ATR,MTOR,PTEN,HDAC8,AR,RAD50,CENPJ,BRPF1,KAT6A,EHMT1,BRCA1,KMT2A,WWOX
Reactome	HSA-3700989	Transcriptional Regulation by TP53	19	363	0.99	1.33e-10	CDK13,CSNK2A1,CREBBP,EP300,NBN,ATM,FANCC,FANCI,PPP2R1A,MRE11A,ATR,MTOR,PTEN,RAD50,CENPJ,BRPF1,KAT6A,EHMT1,BRCA1
Reactome	HSA-74160	Gene expression (Transcription)	33	1455	0.62	3.98e-10	CDK13,CSNK2A1,CREBBP,SETD1A,EP300,NOTCH3,NBN,ATM,KIT,FANCC,KMT2D,FANCI,PPP2R1A,MRE11A,NKX2-5,GATA4,PTPN11,SMAD4,ATR,ERCC6,ACTB,MTOR,PTEN,HDAC8,AR,RAD50,CENPJ,BRPF1,KAT6A,EHMT1,BRCA1,KMT2A,WWOX
Reactome	HSA-1500620	Meiosis	11	87	1.37	1.54e-09	NBN,TINF2,ATM,SMC1A,MRE11A,RAD51C,ATR,SYNE1,RAD50,BRCA2,BRCA1
Reactome	HSA-5693554	Resolution of D-loop Structures through Synthesis-Dependent Strand Annealing (SDSA)	8	25	1.77	1.83e-09	NBN,ATM,MRE11A,RAD51C,RTEL1,RAD50,BRCA2,BRCA1
Reactome	HSA-5633007	Regulation of TP53 Activity	13	159	1.18	2.10e-09	CSNK2A1,EP300,NBN,ATM,PPP2R1A,MRE11A,ATR,MTOR,RAD50,BRPF1,KAT6A,EHMT1,BRCA1
Reactome	HSA-5663202	Diseases of signal transduction by growth factor receptors and second messengers	17	392	0.9	1.29e-08	APC,CREBBP,EP300,KIT,LRP5,SHH,PPP2R1A,PTPN11,SMAD4,ACTB,NF1,VCP,TGFBR2,MTOR,PSEN2,PTEN,HDAC8
Reactome	HSA-5693616	Presynaptic phase of homologous DNA pairing and strand exchange	8	38	1.59	2.00e-08	NBN,ATM,MRE11A,RAD51C,ATR,RAD50,BRCA2,BRCA1
Reactome	HSA-5685942	HDR through Homologous Recombination (HRR)	9	65	1.41	3.24e-08	NBN,ATM,MRE11A,RAD51C,ATR,RTEL1,RAD50,BRCA2,BRCA1
Reactome	HSA-5693532	DNA Double-Strand Break Repair	11	148	1.14	1.32e-07	HERC2,NBN,ATM,MRE11A,RAD51C,ATR,RTEL1,TDP2,RAD50,BRCA2,BRCA1
Reactome	HSA-5693567	HDR through Homologous Recombination (HRR) or Single Strand Annealing (SSA)	10	113	1.21	1.52e-07	HERC2,NBN,ATM,MRE11A,RAD51C,ATR,RTEL1,RAD50,BRCA2,BRCA1
Reactome	HSA-5693568	Resolution of D-loop Structures through Holliday Junction Intermediates	7	31	1.62	1.52e-07	NBN,ATM,MRE11A,RAD51C,RAD50,BRCA2,BRCA1
Reactome	HSA-6783310	Fanconi Anemia Pathway	7	37	1.54	3.81e-07	FANCM,FANCC,FANCI,ATR,FANCG,FANCA,FANCL
Reactome	HSA-3247509	Chromatin modifying enzymes	12	237	0.97	1.03e-06	CREBBP,KANSL1,SETD1A,EP300,KMT2D,PRMT7,ACTB,HDAC8,BRPF1,KAT6A,EHMT1,KMT2A
Reactome	HSA-5693571	Nonhomologous End-Joining (NHEJ)	7	52	2023-04-01	2.76e-06	HERC2,NBN,ATM,MRE11A,TDP2,RAD50,BRCA1
Reactome	HSA-912446	Meiotic recombination	7	55	1.37	3.77e-06	NBN,ATM,MRE11A,RAD51C,RAD50,BRCA2,BRCA1
Reactome	HSA-5685938	HDR through Single Strand Annealing (SSA)	6	36	1.49	8.26e-06	NBN,ATM,MRE11A,ATR,RAD50,BRCA1
Reactome	HSA-5693548	Sensing of DNA Double Strand Breaks	4	6	2023-09-02	1.36e-05	NBN,ATM,MRE11A,RAD50
Reactome	HSA-2262752	Cellular responses to stress	15	544	0.71	2.54e-05	CREBBP,EP300,NBN,TINF2,SOD1,ATM,TUBB3,MRE11A,ATR,VCP,MTOR,AR,RAD50,EHMT1,RPS19
Reactome	HSA-69473	G2/M DNA damage checkpoint	7	78	1.22	2.93e-05	HERC2,NBN,ATM,MRE11A,ATR,RAD50,BRCA1
Reactome	HSA-5688426	Deubiquitination	11	280	0.86	3.47e-05	APC,EP300,SMAD4,ACTB,VCP,TGFBR2,PARK2,PTEN,AR,ASXL1,BRCA1
Reactome	HSA-5693607	Processing of DNA double-strand break ends	7	81	2023-02-01	3.47e-05	HERC2,NBN,ATM,MRE11A,ATR,RAD50,BRCA1
Reactome	HSA-6804756	Regulation of TP53 Activity through Phosphorylation	7	92	1.15	7.26e-05	CSNK2A1,NBN,ATM,MRE11A,ATR,RAD50,BRCA1
Reactome	HSA-5693565	Recruitment and ATM-mediated phosphorylation of repair and signaling proteins at DNA double strand breaks	6	60	1.27	9.76e-05	HERC2,NBN,ATM,MRE11A,RAD50,BRCA1
Reactome	HSA-201681	TCF dependent signaling in response to WNT	9	199	0.92	0.00012	CSNK2A1,APC,CREBBP,EP300,LRP5,KMT2D,TERT,PPP2R1A,SOX3
Reactome	HSA-9612973	Autophagy	8	148	1.0	0.00012	CSNK2A1,MFN2,ATM,TUBB3,VCP,MTOR,PARK2,GFAP
Reactome	HSA-6796648	TP53 Regulates Transcription of DNA Repair Genes	6	65	1.23	0.00013	CDK13,ATM,FANCC,FANCI,ATR,BRCA1
Reactome	HSA-1266738	Developmental Biology	19	1087	0.51	0.00037	CSNK2A1,CREBBP,EP300,KMT2D,TUBB3,ZNF335,WT1,GATA4,PTPN11,SMAD4,RET,ACTB,PSEN2,PDX1,TCF4,PAX6,GDNF,KMT2A,RPS19
Reactome	HSA-9663891	Selective autophagy	6	80	1.14	0.00039	CSNK2A1,MFN2,ATM,TUBB3,VCP,PARK2
Reactome	HSA-1632852	Macroautophagy	7	133	0.99	0.00059	CSNK2A1,MFN2,ATM,TUBB3,VCP,MTOR,PARK2
Reactome	HSA-171319	Telomere Extension By Telomerase	4	22	1.53	0.00059	TINF2,TERT,RTEL1,DKC1
Reactome	HSA-3371556	Cellular response to heat stress	6	89	2023-09-01	0.00065	CREBBP,EP300,ATM,ATR,VCP,MTOR
Reactome	HSA-68877	Mitotic Prometaphase	8	199	0.87	0.00083	CSNK2A1,TUBGCP6,TUBB3,SMC1A,PPP2R1A,CDK5RAP2,HDAC8,CENPJ
Reactome	HSA-1221632	Meiotic synapsis	5	60	1.19	0.0013	TINF2,SMC1A,ATR,SYNE1,BRCA1
Reactome	HSA-1643685	Disease	22	1548	0.42	0.0013	APC,CREBBP,EP300,NOTCH3,KIT,LRP5,SHH,TUBB3,PPP2R1A,PTPN11,SMAD4,ACTB,NF1,VCP,TGFBR2,MTOR,PSEN2,PTEN,ATRX,HDAC8,BRCA1,RPS19
Reactome	HSA-2559586	DNA Damage/Telomere Stress Induced Senescence	5	61	1.18	0.0013	NBN,TINF2,ATM,MRE11A,RAD50
Reactome	HSA-3214847	HATs acetylate histones	6	107	2023-01-01	0.0015	CREBBP,KANSL1,EP300,ACTB,BRPF1,KAT6A
Reactome	HSA-3108232	SUMO E3 ligases SUMOylate target proteins	7	166	0.89	0.0018	HERC2,CREBBP,EP300,MITF,SMC1A,AR,BRCA1
Reactome	HSA-5685939	HDR through MMEJ (alt-NHEJ)	3	10	1.74	0.0018	NBN,MRE11A,RAD50
Reactome	HSA-8864260	Transcriptional regulation by the AP-2 (TFAP2) family of transcription factors	4	35	1.32	0.0023	CREBBP,EP300,KIT,WWOX
Reactome	HSA-8866907	Activation of the TFAP2 (AP-2) family of transcription factors	3	12	1.66	0.0027	CREBBP,EP300,WWOX
Reactome	HSA-162582	Signal Transduction	30	2741	0.31	0.0040	CSNK2A1,PROKR2,APC,CREBBP,EP300,NOTCH3,KIT,LRP5,SHH,KMT2D,TERT,TUBB3,SMC1A,PPP2R1A,PTPN11,SMAD4,RET,ACTB,NF1,VCP,TGFBR2,MTOR,PSEN2,SOX3,PTEN,HDAC8,AR,GDNF,WWOX,GFAP
Reactome	HSA-186712	Regulation of beta-cell development	4	42	1.25	0.0042	CREBBP,EP300,PDX1,PAX6
Reactome	HSA-69620	Cell Cycle Checkpoints	8	269	0.74	0.0049	HERC2,NBN,ATM,PPP2R1A,MRE11A,ATR,RAD50,BRCA1
Reactome	HSA-69278	Cell Cycle, Mitotic	11	518	0.59	0.0050	CSNK2A1,TUBGCP6,EP300,CDT1,TUBB3,SMC1A,PPP2R1A,MCPH1,CDK5RAP2,HDAC8,CENPJ
Reactome	HSA-8878171	Transcriptional regulation by RUNX1	7	204	0.8	0.0054	CSNK2A1,CREBBP,SETD1A,EP300,KMT2D,PTPN11,KMT2A
Reactome	HSA-3214841	PKMTs methylate histone lysines	4	47	2023-02-01	0.0059	SETD1A,KMT2D,EHMT1,KMT2A
Reactome	HSA-5617472	Activation of anterior HOX genes in hindbrain development during early embryogenesis	5	91	2023-01-01	0.0061	CREBBP,EP300,KMT2D,ZNF335,PAX6
Reactome	HSA-157579	Telomere Maintenance	5	92	1.0	0.0062	TINF2,TERT,RTEL1,DKC1,ATRX
Reactome	HSA-380320	Recruitment of NuMA to mitotic centrosomes	5	93	1.0	0.0064	TUBGCP6,TUBB3,PPP2R1A,CDK5RAP2,CENPJ
Reactome	HSA-9012852	Signaling by NOTCH3	4	49	1.18	0.0064	CREBBP,EP300,NOTCH3,PSEN2
Reactome	HSA-6804760	Regulation of TP53 Activity through Methylation	3	19	1.46	0.0070	EP300,ATM,EHMT1
Reactome	HSA-68886	M Phase	9	376	0.65	0.0076	CSNK2A1,TUBGCP6,TUBB3,SMC1A,PPP2R1A,MCPH1,CDK5RAP2,HDAC8,CENPJ
Reactome	HSA-2559583	Cellular Senescence	6	164	0.83	0.0100	NBN,TINF2,ATM,MRE11A,RAD50,EHMT1
Reactome	HSA-2644606	Constitutive Signaling by NOTCH1 PEST Domain Mutants	4	58	2023-01-01	0.0108	CREBBP,EP300,PSEN2,HDAC8
Reactome	HSA-2894862	Constitutive Signaling by NOTCH1 HD+PEST Domain Mutants	4	58	2023-01-01	0.0108	CREBBP,EP300,PSEN2,HDAC8
Reactome	HSA-3371571	HSF1-dependent transactivation	3	23	1.38	0.0108	CREBBP,EP300,MTOR
Reactome	HSA-392499	Metabolism of proteins	23	1977	0.33	0.0108	CSNK2A1,PROC,APC,HERC2,CREBBP,EP300,MITF,ALB,TUBB3,SMC1A,GATA4,SMAD4,ACTB,VCP,TGFBR2,PARK2,PTEN,AR,ASXL1,PAX6,BRCA1,EIF3F,RPS19
Reactome	HSA-201722	Formation of the beta-catenin:TCF transactivating complex	4	60	2023-09-01	0.0111	CREBBP,EP300,KMT2D,TERT
Reactome	HSA-9013508	NOTCH3 Intracellular Domain Regulates Transcription	3	25	1.35	0.0126	CREBBP,EP300,NOTCH3
Reactome	HSA-597592	Post-translational protein modification	18	1390	0.38	0.0138	PROC,APC,HERC2,CREBBP,EP300,MITF,ALB,TUBB3,SMC1A,SMAD4,ACTB,VCP,TGFBR2,PARK2,PTEN,AR,ASXL1,BRCA1
Reactome	HSA-8936459	RUNX1 regulates genes involved in megakaryocyte differentiation and platelet function	4	66	2023-05-01	0.0149	SETD1A,EP300,KMT2D,KMT2A
Reactome	HSA-3134973	LRR FLII-interacting protein 1 (LRRFIP1) activates type I IFN production	2	5	1.87	0.0157	CREBBP,EP300
Reactome	HSA-350054	Notch-HLH transcription pathway	3	28	2023-03-01	0.0160	CREBBP,NOTCH3,HDAC8
Reactome	HSA-5205647	Mitophagy	3	29	1.28	0.0174	CSNK2A1,MFN2,PARK2
Reactome	HSA-6804758	Regulation of TP53 Activity through Acetylation	3	30	1.27	0.0187	EP300,BRPF1,KAT6A
Reactome	HSA-69275	G2/M Transition	6	193	0.76	0.0187	TUBGCP6,EP300,TUBB3,PPP2R1A,CDK5RAP2,CENPJ
Reactome	HSA-4641262	Disassembly of the destruction complex and recruitment of AXIN to the membrane	3	31	1.25	0.0199	APC,LRP5,PPP2R1A
Reactome	HSA-1980143	Signaling by NOTCH1	4	74	1.0	0.0204	CREBBP,EP300,PSEN2,HDAC8
Reactome	HSA-1251985	Nuclear signaling by ERBB4	3	32	1.24	0.0212	PSEN2,WWOX,GFAP
Reactome	HSA-5684996	MAPK1/MAPK3 signaling	7	280	0.66	0.0222	KIT,PPP2R1A,PTPN11,RET,ACTB,NF1,GDNF
Reactome	HSA-3304349	Loss of Function of SMAD2/3 in Cancer	2	7	1.72	0.0238	SMAD4,TGFBR2
Reactome	HSA-4791275	Signaling by WNT in cancer	3	34	1.21	0.0242	APC,LRP5,PPP2R1A
Reactome	HSA-380270	Recruitment of mitotic centrosome proteins and complexes	4	80	0.97	0.0255	TUBGCP6,PPP2R1A,CDK5RAP2,CENPJ
Reactome	HSA-6804757	Regulation of TP53 Degradation	3	35	2023-02-01	0.0255	ATM,PPP2R1A,MTOR
Reactome	HSA-9017802	Noncanonical activation of NOTCH3	2	8	1.66	0.0279	NOTCH3,PSEN2
Reactome	HSA-5689896	Ovarian tumor domain proteases	3	38	1.16	0.0303	APC,VCP,PTEN
Reactome	HSA-8853659	RET signaling	3	40	1.14	0.0345	PTPN11,RET,GDNF
Reactome	HSA-3769402	Deactivation of the beta-catenin transactivating complex	3	41	1.13	0.0363	APC,KMT2D,SOX3
Reactome	HSA-983231	Factors involved in megakaryocyte development and platelet production	5	154	0.78	0.0363	MFN2,TUBB3,GATA4,RAD51C,ACTB
Reactome	HSA-109582	Hemostasis	10	605	0.48	0.0370	PROC,MFN2,SOD1,ALB,TUBB3,PPP2R1A,GATA4,RAD51C,PTPN11,ACTB
Reactome	HSA-9006934	Signaling by Receptor Tyrosine Kinases	9	502	0.52	0.0370	EP300,KIT,PPP2R1A,PTPN11,ACTB,MTOR,PSEN2,WWOX,GFAP
Reactome	HSA-9617629	Regulation of FOXO transcriptional activity by acetylation	2	10	1.57	0.0375	CREBBP,EP300
Reactome	HSA-9646399	Aggrephagy	3	42	2023-12-01	0.0375	TUBB3,VCP,PARK2
Reactome	HSA-9690406	Transcriptional regulation of testis differentiation	2	10	1.57	0.0375	WT1,GATA4
Reactome	HSA-1234158	Regulation of gene expression by Hypoxia-inducible Factor	2	11	1.53	0.0426	CREBBP,EP300
Reactome	HSA-5578768	Physiological factors	2	12	1.49	0.0491	NKX2-5,GATA4
Reactome	HSA-5689877	Josephin domain DUBs	2	12	1.49	0.0491	VCP,PARK2

## Sheet: Enrichment subnetwork2
#category	term ID	term description	observed gene count	background gene count	strength	false discovery rate	matching proteins in your network (labels)
GO Biological Process
GO Process	GO:0050953	Sensory perception of light stimulus	28	224	1.58	3.91e-32	USH1C,IMPG2,WFS1,PRPH2,MKKS,CNGB1,GUCY2D,PDE6A,RPE65,BBS7,ROM1,BBS5,USH2A,BBS1,CLRN1,MYO9A,CRB1,ABCA4,PCDH15,BBS10,CDH23,CNGA1,FAM161A,MYO7A,BEST1,PDE6B,EYS,RBP3
GO Process	GO:0007601	Visual perception	26	220	1.55	3.85e-29	IMPG2,WFS1,PRPH2,MKKS,CNGB1,GUCY2D,PDE6A,RPE65,BBS7,ROM1,BBS5,USH2A,BBS1,CLRN1,MYO9A,CRB1,ABCA4,BBS10,CDH23,CNGA1,FAM161A,MYO7A,BEST1,PDE6B,EYS,RBP3
GO Process	GO:0045494	Photoreceptor cell maintenance	17	41	2023-01-02	5.39e-26	USH1C,MKKS,CNGB1,TUB,USH2A,BBS1,CLRN1,NPHP3,MAK,CRB1,ABCA4,PCDH15,LCA5,BBS10,CDH23,BBS12,CDHR1
GO Process	GO:0044782	Cilium organization	27	360	1.35	8.63e-26	CEP41,MKKS,TMEM231,BBS7,CEP164,BBS5,TUB,TMEM107,BBS1,NPHP3,OFD1,KIAA0586,MAK,AHI1,LCA5,MKS1,BBS10,DYNC2H1,WDR19,FAM161A,C5orf42,TMEM67,IFT74,BBS12,CEP290,DYNC2LI1,ALMS1
GO Process	GO:0001895	Retina homeostasis	18	74	1.86	2.19e-24	USH1C,MKKS,CNGB1,RPE65,TUB,USH2A,BBS1,CLRN1,NPHP3,MAK,CRB1,ABCA4,PCDH15,LCA5,BBS10,CDH23,BBS12,CDHR1
GO Process	GO:0120036	Plasma membrane bounded cell projection organization	35	1122	0.97	6.52e-23	USH1C,CEP41,MKKS,DOCK7,TMEM231,BBS7,CEP164,BBS5,TUB,TMEM107,BBS1,CLRN1,PTCH1,NPHP3,OFD1,KIAA0586,MAK,AHI1,LCA5,MKS1,BBS10,GLI3,DYNC2H1,CDH23,WDR19,FAM161A,MYO7A,C5orf42,TMEM67,IFT74,TRIM32,BBS12,CEP290,DYNC2LI1,ALMS1
GO Process	GO:0060271	Cilium assembly	24	339	1.33	3.82e-22	CEP41,MKKS,TMEM231,BBS7,CEP164,BBS5,TMEM107,BBS1,NPHP3,OFD1,KIAA0586,MAK,AHI1,MKS1,BBS10,DYNC2H1,WDR19,FAM161A,C5orf42,TMEM67,IFT74,CEP290,DYNC2LI1,ALMS1
GO Process	GO:0007600	Sensory perception	31	923	1.0	1.20e-20	USH1C,IMPG2,WFS1,PRPH2,MKKS,CNGB1,GUCY2D,PDE6A,RPE65,BBS7,ROM1,BBS5,TUB,USH2A,BBS1,CLRN1,GJB4,MYO9A,CRB1,ABCA4,PCDH15,GJB2,BBS10,CDH23,CNGA1,FAM161A,MYO7A,BEST1,PDE6B,EYS,RBP3
GO Process	GO:0001894	Tissue homeostasis	20	219	1.44	5.13e-20	USH1C,MKKS,CNGB1,RPE65,TUB,USH2A,BBS1,CLRN1,NPHP3,MAK,CRB1,ABCA4,PCDH15,LCA5,MKS1,BBS10,CDH23,TRIM32,BBS12,CDHR1
GO Process	GO:0048871	Multicellular organismal homeostasis	21	352	1.25	1.14e-17	USH1C,WFS1,MKKS,CNGB1,RPE65,TUB,USH2A,BBS1,CLRN1,NPHP3,MAK,CRB1,ABCA4,PCDH15,LCA5,MKS1,BBS10,CDH23,TRIM32,BBS12,CDHR1
GO Process	GO:0050877	Nervous system process	32	1352	0.85	3.35e-17	USH1C,IMPG2,WFS1,PRPH2,MKKS,CNGB1,GUCY2D,PDE6A,RPE65,BBS7,ROM1,BBS5,TUB,USH2A,BBS1,CLRN1,GJB4,MYO9A,CRB1,ABCA4,PCDH15,GJB2,BBS10,CDH23,WDR19,CNGA1,FAM161A,MYO7A,BEST1,PDE6B,EYS,RBP3
GO Process	GO:0070925	Organelle assembly	25	735	2023-01-01	4.36e-16	CEP41,MKKS,TMEM231,BBS7,CEP164,BBS5,TMEM107,BBS1,NPHP3,OFD1,KIAA0586,MAK,AHI1,MKS1,BBS10,DYNC2H1,WDR19,FAM161A,MYO7A,C5orf42,TMEM67,IFT74,CEP290,DYNC2LI1,ALMS1
GO Process	GO:0007423	Sensory organ development	22	563	2023-07-01	5.09e-15	USH1C,PRPH2,PDE6A,TMEM231,RPE65,BBS7,ROM1,DCHS1,TUB,USH2A,CLRN1,CRB1,AHI1,PCDH15,GJB2,MKS1,GLI3,CDH23,WDR19,MYO7A,PDE6B,CEP290
GO Process	GO:0032501	Multicellular organismal process	55	6933	0.38	3.31e-13	USH1C,IMPG2,WFS1,PRPH2,MKKS,CNGB1,DOCK7,GUCY2D,PDE6A,TMEM231,RPE65,BBS7,ROM1,GDF6,BBS5,DCHS1,CEP120,TUB,USH2A,TMEM107,BBS1,CLRN1,PTCH1,NPHP3,OFD1,GJB4,MAK,MYO9A,CRB1,AHI1,ABCA4,PCDH15,GJB2,LCA5,MKS1,BBS10,GLI3,DYNC2H1,CDH23,WDR19,CNGA1,FAM161A,MYO7A,C5orf42,BEST1,IFT74,TRIM32,PDE6B,EYS,BBS12,GPR161,CEP290,RBP3,DYNC2LI1,CDHR1
GO Process	GO:0009584	Detection of visible light	9	48	1.75	1.37e-10	CNGB1,PDE6A,RPE65,CRB1,ABCA4,CNGA1,BEST1,PDE6B,EYS
GO Process	GO:0043583	Ear development	13	225	1.24	5.06e-10	USH1C,DCHS1,USH2A,CLRN1,AHI1,PCDH15,GJB2,MKS1,GLI3,CDH23,WDR19,MYO7A,CEP290
GO Process	GO:0046530	Photoreceptor cell differentiation	9	59	1.66	6.64e-10	USH1C,CNGB1,RPE65,ROM1,CRB1,AHI1,MYO7A,CEP290,CDHR1
GO Process	GO:0001654	Eye development	15	365	2023-09-01	7.33e-10	USH1C,PRPH2,PDE6A,TMEM231,RPE65,BBS7,ROM1,TUB,CRB1,AHI1,GLI3,WDR19,MYO7A,PDE6B,CEP290
GO Process	GO:0048839	Inner ear development	12	198	1.26	1.91e-09	USH1C,DCHS1,USH2A,CLRN1,AHI1,PCDH15,GJB2,MKS1,GLI3,CDH23,MYO7A,CEP290
GO Process	GO:0048598	Embryonic morphogenesis	17	571	0.95	2.26e-09	USH1C,MKKS,TMEM231,BBS7,BBS5,TMEM107,CLRN1,PTCH1,NPHP3,AHI1,MKS1,GLI3,DYNC2H1,WDR19,MYO7A,C5orf42,CEP290
GO Process	GO:1905515	Non-motile cilium assembly	8	45	1.73	3.23e-09	MKKS,BBS7,TMEM107,BBS1,MKS1,BBS10,DYNC2H1,IFT74
GO Process	GO:0042461	Photoreceptor cell development	8	47	1.71	4.27e-09	USH1C,CNGB1,RPE65,CRB1,AHI1,MYO7A,CEP290,CDHR1
GO Process	GO:0022607	Cellular component assembly	30	2359	0.58	5.08e-09	USH1C,CEP41,MKKS,TMEM231,BBS7,CEP164,BBS5,TMEM107,BBS1,NPHP3,OFD1,KIAA0586,MAK,MYO9A,AHI1,GJB2,MKS1,BBS10,DYNC2H1,CDH23,WDR19,FAM161A,MYO7A,C5orf42,TMEM67,IFT74,BBS12,CEP290,DYNC2LI1,ALMS1
GO Process	GO:0007389	Pattern specification process	15	432	2023-02-01	5.34e-09	MKKS,BBS7,BBS5,DCHS1,TMEM107,PTCH1,NPHP3,OFD1,AHI1,MKS1,GLI3,DYNC2H1,WDR19,IFT74,DYNC2LI1
GO Process	GO:0007368	Determination of left/right symmetry	10	120	2023-04-01	5.85e-09	MKKS,BBS7,BBS5,NPHP3,OFD1,AHI1,MKS1,DYNC2H1,IFT74,DYNC2LI1
GO Process	GO:0042073	Intraciliary transport	8	52	1.67	7.81e-09	TUB,MAK,LCA5,DYNC2H1,WDR19,IFT74,BBS12,DYNC2LI1
GO Process	GO:0009581	Detection of external stimulus	10	131	1.36	1.18e-08	MKKS,CNGB1,PDE6A,RPE65,CRB1,ABCA4,CNGA1,BEST1,PDE6B,EYS
GO Process	GO:0009582	Detection of abiotic stimulus	10	133	1.35	1.32e-08	MKKS,CNGB1,PDE6A,RPE65,CRB1,ABCA4,CNGA1,BEST1,PDE6B,EYS
GO Process	GO:0007275	Multicellular organism development	42	5023	0.4	1.71e-08	USH1C,WFS1,PRPH2,MKKS,CNGB1,DOCK7,PDE6A,TMEM231,RPE65,BBS7,ROM1,GDF6,BBS5,DCHS1,CEP120,TUB,USH2A,TMEM107,CLRN1,PTCH1,NPHP3,OFD1,MAK,MYO9A,CRB1,AHI1,PCDH15,GJB2,MKS1,GLI3,DYNC2H1,CDH23,WDR19,MYO7A,C5orf42,IFT74,TRIM32,PDE6B,GPR161,CEP290,DYNC2LI1,CDHR1
GO Process	GO:0048856	Anatomical structure development	43	5402	0.38	3.85e-08	USH1C,WFS1,PRPH2,MKKS,CNGB1,DOCK7,PDE6A,TMEM231,RPE65,BBS7,ROM1,GDF6,BBS5,DCHS1,CEP120,TUB,USH2A,TMEM107,CLRN1,PTCH1,NPHP3,OFD1,MAK,MYO9A,CRB1,AHI1,PCDH15,GJB2,MKS1,GLI3,DYNC2H1,CDH23,WDR19,MYO7A,C5orf42,IFT74,TRIM32,PDE6B,EYS,GPR161,CEP290,DYNC2LI1,CDHR1
GO Process	GO:0007605	Sensory perception of sound	10	153	1.29	4.16e-08	USH1C,WFS1,MKKS,TUB,USH2A,CLRN1,PCDH15,GJB2,CDH23,MYO7A
GO Process	GO:0007224	Smoothened signaling pathway	8	72	1.52	6.35e-08	TMEM231,BBS7,PTCH1,EVC2,KIAA0586,MKS1,GLI3,WDR19
GO Process	GO:0050957	Equilibrioception	5	7	2.33	7.39e-08	USH1C,CLRN1,PCDH15,CDH23,MYO7A
GO Process	GO:0060429	Epithelium development	20	1109	0.73	8.61e-08	USH1C,MKKS,TMEM231,BBS7,BBS5,DCHS1,USH2A,TMEM107,CLRN1,PTCH1,NPHP3,MYO9A,AHI1,MKS1,GLI3,WDR19,MYO7A,C5orf42,IFT74,CEP290
GO Process	GO:0042592	Homeostatic process	24	1676	0.63	8.73e-08	USH1C,WFS1,MKKS,CNGB1,PDE6A,RPE65,TUB,USH2A,BBS1,CLRN1,PTCH1,NPHP3,MAK,CRB1,ABCA4,PCDH15,LCA5,MKS1,BBS10,CDH23,TRIM32,PDE6B,BBS12,CDHR1
GO Process	GO:0048731	System development	38	4426	0.41	1.47e-07	USH1C,WFS1,PRPH2,MKKS,CNGB1,DOCK7,PDE6A,TMEM231,RPE65,BBS7,ROM1,GDF6,BBS5,DCHS1,CEP120,TUB,USH2A,TMEM107,CLRN1,PTCH1,NPHP3,MYO9A,CRB1,AHI1,PCDH15,GJB2,MKS1,GLI3,DYNC2H1,CDH23,WDR19,MYO7A,C5orf42,IFT74,TRIM32,PDE6B,CEP290,CDHR1
GO Process	GO:0043010	Camera-type eye development	12	318	2023-06-01	1.91e-07	USH1C,PRPH2,PDE6A,TMEM231,RPE65,ROM1,TUB,CRB1,AHI1,GLI3,WDR19,PDE6B
GO Process	GO:0016043	Cellular component organization	42	5447	0.37	1.98e-07	USH1C,CEP41,MKKS,CNGB1,DOCK7,TMEM231,BBS7,CEP164,BBS5,CEP120,TUB,TMEM107,BBS1,CLRN1,PTCH1,NPHP3,OFD1,KIAA0586,MAK,MYO9A,CRB1,AHI1,ABCA4,GJB2,LCA5,MKS1,BBS10,GLI3,DYNC2H1,CDH23,WDR19,FAM161A,MYO7A,C5orf42,TMEM67,IFT74,TRIM32,BBS12,CEP290,DYNC2LI1,ALMS1,CDHR1
GO Process	GO:0099111	Microtubule-based transport	10	185	1.21	2.00e-07	TUB,NPHP3,OFD1,MAK,LCA5,DYNC2H1,WDR19,IFT74,BBS12,DYNC2LI1
GO Process	GO:0048513	Animal organ development	32	3197	0.48	2.15e-07	USH1C,WFS1,PRPH2,MKKS,DOCK7,PDE6A,TMEM231,RPE65,BBS7,ROM1,BBS5,DCHS1,CEP120,TUB,USH2A,CLRN1,PTCH1,NPHP3,CRB1,AHI1,PCDH15,GJB2,MKS1,GLI3,DYNC2H1,CDH23,WDR19,MYO7A,C5orf42,IFT74,PDE6B,CEP290
GO Process	GO:0006996	Organelle organization	33	3450	0.46	3.10e-07	USH1C,CEP41,MKKS,DOCK7,TMEM231,BBS7,CEP164,BBS5,CEP120,TUB,TMEM107,BBS1,CLRN1,NPHP3,OFD1,KIAA0586,MAK,AHI1,LCA5,MKS1,BBS10,DYNC2H1,WDR19,FAM161A,MYO7A,C5orf42,TMEM67,IFT74,TRIM32,BBS12,CEP290,DYNC2LI1,ALMS1
GO Process	GO:0060041	Retina development in camera-type eye	9	142	1.28	3.77e-07	USH1C,PRPH2,PDE6A,RPE65,ROM1,TUB,CRB1,AHI1,PDE6B
GO Process	GO:0097711	Ciliary basal body-plasma membrane docking	8	95	2023-04-01	3.87e-07	CEP41,CEP164,OFD1,AHI1,MKS1,TMEM67,CEP290,ALMS1
GO Process	GO:0009887	Animal organ morphogenesis	18	967	0.75	4.03e-07	USH1C,MKKS,RPE65,BBS7,ROM1,BBS5,DCHS1,USH2A,CLRN1,PTCH1,NPHP3,CRB1,AHI1,MKS1,GLI3,WDR19,MYO7A,CEP290
GO Process	GO:0009653	Anatomical structure morphogenesis	26	2165	0.56	4.12e-07	USH1C,MKKS,DOCK7,TMEM231,RPE65,BBS7,ROM1,BBS5,DCHS1,USH2A,TMEM107,CLRN1,PTCH1,NPHP3,MYO9A,CRB1,AHI1,MKS1,GLI3,DYNC2H1,CDH23,WDR19,MYO7A,C5orf42,CEP290,CDHR1
GO Process	GO:0007399	Nervous system development	27	2371	0.54	5.33e-07	USH1C,MKKS,CNGB1,DOCK7,RPE65,BBS7,ROM1,GDF6,DCHS1,CEP120,USH2A,TMEM107,CLRN1,PTCH1,MYO9A,CRB1,AHI1,MKS1,GLI3,DYNC2H1,CDH23,WDR19,MYO7A,C5orf42,TRIM32,CEP290,CDHR1
GO Process	GO:0048568	Embryonic organ development	13	448	0.94	6.15e-07	USH1C,MKKS,BBS7,BBS5,CLRN1,PTCH1,NPHP3,AHI1,MKS1,GLI3,WDR19,MYO7A,CEP290
GO Process	GO:0009790	Embryo development	18	1002	0.73	6.45e-07	USH1C,MKKS,TMEM231,BBS7,BBS5,DCHS1,TMEM107,CLRN1,PTCH1,NPHP3,AHI1,MKS1,GLI3,DYNC2H1,WDR19,MYO7A,C5orf42,CEP290
GO Process	GO:0030182	Neuron differentiation	18	1019	0.73	8.23e-07	USH1C,CNGB1,DOCK7,RPE65,ROM1,USH2A,CLRN1,PTCH1,CRB1,AHI1,MKS1,GLI3,DYNC2H1,CDH23,MYO7A,TRIM32,CEP290,CDHR1
GO Process	GO:0048562	Embryonic organ morphogenesis	11	301	2023-04-01	1.11e-06	USH1C,MKKS,BBS7,BBS5,CLRN1,NPHP3,AHI1,GLI3,WDR19,MYO7A,CEP290
GO Process	GO:0022008	Neurogenesis	22	1657	0.6	1.78e-06	USH1C,CNGB1,DOCK7,RPE65,ROM1,GDF6,DCHS1,CEP120,USH2A,CLRN1,PTCH1,MYO9A,CRB1,AHI1,MKS1,GLI3,DYNC2H1,CDH23,MYO7A,TRIM32,CEP290,CDHR1
GO Process	GO:0051640	Organelle localization	14	598	0.85	1.88e-06	CEP41,MKKS,DOCK7,BBS7,CEP164,BBS5,CEP120,OFD1,AHI1,MKS1,MYO7A,TMEM67,CEP290,ALMS1
GO Process	GO:0007603	Phototransduction, visible light	5	18	1.92	2.04e-06	CNGB1,PDE6A,ABCA4,CNGA1,PDE6B
GO Process	GO:0060173	Limb development	9	181	1.18	2.27e-06	TMEM231,BBS7,TMEM107,PTCH1,MKS1,GLI3,DYNC2H1,WDR19,C5orf42
GO Process	GO:0050908	Detection of light stimulus involved in visual perception	5	19	2023-09-01	2.46e-06	CNGB1,RPE65,CRB1,BEST1,EYS
GO Process	GO:0030326	Embryonic limb morphogenesis	8	127	1.28	2.56e-06	TMEM231,TMEM107,PTCH1,MKS1,GLI3,DYNC2H1,WDR19,C5orf42
GO Process	GO:0007018	Microtubule-based movement	11	334	1.0	2.73e-06	TUB,NPHP3,OFD1,MAK,LCA5,KIF7,DYNC2H1,WDR19,IFT74,BBS12,DYNC2LI1
GO Process	GO:0051641	Cellular localization	29	2967	0.47	2.73e-06	CEP41,MKKS,CNGB1,DOCK7,BBS7,CEP164,BBS5,DCHS1,CEP120,TUB,TMEM107,BBS1,PTCH1,OFD1,MAK,CRB1,AHI1,LCA5,MKS1,DYNC2H1,WDR19,MYO7A,C5orf42,TMEM67,IFT74,BBS12,CEP290,DYNC2LI1,ALMS1
GO Process	GO:0090596	Sensory organ morphogenesis	10	264	2023-06-01	3.57e-06	USH1C,RPE65,ROM1,CLRN1,CRB1,AHI1,GLI3,WDR19,MYO7A,CEP290
GO Process	GO:0002009	Morphogenesis of an epithelium	12	435	0.92	3.69e-06	MKKS,BBS7,BBS5,DCHS1,PTCH1,NPHP3,MYO9A,AHI1,MKS1,GLI3,C5orf42,CEP290
GO Process	GO:0030705	Cytoskeleton-dependent intracellular transport	9	195	1.14	3.69e-06	TUB,MAK,LCA5,DYNC2H1,WDR19,MYO7A,IFT74,BBS12,DYNC2LI1
GO Process	GO:0009888	Tissue development	22	1760	0.58	4.34e-06	USH1C,MKKS,TMEM231,BBS7,BBS5,DCHS1,USH2A,TMEM107,CLRN1,PTCH1,NPHP3,MYO9A,AHI1,GJB2,MKS1,GLI3,WDR19,MYO7A,C5orf42,IFT74,EYS,CEP290
GO Process	GO:0061512	Protein localization to cilium	6	51	1.55	5.18e-06	TUB,TMEM107,BBS1,DYNC2H1,WDR19,C5orf42
GO Process	GO:0051179	Localization	40	5591	0.33	5.43e-06	USH1C,CEP41,MKKS,CNGB1,DOCK7,BBS7,CEP164,BBS5,DCHS1,CEP120,TUB,USH2A,TMEM107,BBS1,CLRN1,PTCH1,NPHP3,OFD1,GJB4,MAK,CRB1,AHI1,ABCA4,GJB2,LCA5,MKS1,GLI3,DYNC2H1,CDH23,WDR19,CNGA1,MYO7A,C5orf42,TMEM67,BEST1,IFT74,BBS12,CEP290,DYNC2LI1,ALMS1
GO Process	GO:0048592	Eye morphogenesis	8	151	2023-02-01	7.91e-06	USH1C,RPE65,ROM1,CRB1,AHI1,GLI3,MYO7A,CEP290
GO Process	GO:0060113	Inner ear receptor cell differentiation	6	56	1.51	8.17e-06	USH1C,USH2A,CLRN1,MKS1,CDH23,MYO7A
GO Process	GO:0022400	Regulation of rhodopsin mediated signaling pathway	5	27	1.75	9.34e-06	CNGB1,GUCY2D,PDE6A,CNGA1,PDE6B
GO Process	GO:0009416	Response to light stimulus	10	302	1.0	1.05e-05	CNGB1,PDE6A,RPE65,CRB1,ABCA4,CNGA1,BEST1,TRIM32,PDE6B,EYS
GO Process	GO:0048666	Neuron development	15	827	0.74	1.06e-05	USH1C,CNGB1,DOCK7,RPE65,CLRN1,PTCH1,CRB1,AHI1,MKS1,GLI3,CDH23,MYO7A,TRIM32,CEP290,CDHR1
GO Process	GO:0060562	Epithelial tube morphogenesis	10	307	0.99	1.19e-05	MKKS,BBS7,BBS5,DCHS1,PTCH1,NPHP3,AHI1,MKS1,GLI3,CEP290
GO Process	GO:0048699	Generation of neurons	20	1551	0.59	1.21e-05	USH1C,CNGB1,DOCK7,RPE65,ROM1,GDF6,USH2A,CLRN1,PTCH1,MYO9A,CRB1,AHI1,MKS1,GLI3,DYNC2H1,CDH23,MYO7A,TRIM32,CEP290,CDHR1
GO Process	GO:0060122	Inner ear receptor cell stereocilium organization	5	31	1.69	1.60e-05	USH1C,CLRN1,MKS1,CDH23,MYO7A
GO Process	GO:0007507	Heart development	12	522	0.84	2.08e-05	MKKS,BBS7,BBS5,DCHS1,PTCH1,NPHP3,AHI1,MKS1,GLI3,DYNC2H1,C5orf42,IFT74
GO Process	GO:0008104	Protein localization	23	2139	0.51	2.43e-05	USH1C,CEP41,CNGB1,BBS7,BBS5,DCHS1,TUB,USH2A,TMEM107,BBS1,PTCH1,MAK,CRB1,AHI1,LCA5,DYNC2H1,WDR19,MYO7A,C5orf42,IFT74,BBS12,CEP290,DYNC2LI1
GO Process	GO:0016056	Rhodopsin mediated signaling pathway	4	12	2.0	2.48e-05	CNGB1,PDE6A,CNGA1,PDE6B
GO Process	GO:0035845	Photoreceptor cell outer segment organization	4	12	2.0	2.48e-05	CNGB1,CRB1,AHI1,CDHR1
GO Process	GO:0050896	Response to stimulus	47	8046	0.25	4.59e-05	WFS1,PRPH2,MKKS,CNGB1,DOCK7,GUCY2D,PDE6A,TMEM231,GNB5,RPE65,BBS7,ROM1,CEP164,GDF6,BBS5,DCHS1,TUB,USH2A,BBS1,CLRN1,PTCH1,NPHP3,EVC2,GJB4,KIAA0586,MAK,MYO9A,CRB1,AHI1,ABCA4,NMNAT1,GJB2,MKS1,BBS10,GLI3,CDH23,WDR19,CNGA1,FAM161A,TMEM67,BEST1,IFT74,TRIM32,PDE6B,EYS,GPR161,CEP290
GO Process	GO:0033036	Macromolecule localization	24	2473	0.47	7.25e-05	USH1C,CEP41,CNGB1,BBS7,BBS5,DCHS1,TUB,USH2A,TMEM107,BBS1,PTCH1,MAK,CRB1,AHI1,ABCA4,LCA5,DYNC2H1,WDR19,MYO7A,C5orf42,IFT74,BBS12,CEP290,DYNC2LI1
GO Process	GO:0008589	Regulation of smoothened signaling pathway	6	87	1.32	7.61e-05	PTCH1,MKS1,KIF7,GLI3,DYNC2H1,GPR161
GO Process	GO:0001754	Eye photoreceptor cell differentiation	5	46	1.51	8.45e-05	USH1C,ROM1,CRB1,MYO7A,CEP290
GO Process	GO:0007017	Microtubule-based process	13	727	0.73	8.84e-05	DOCK7,CEP120,TUB,NPHP3,OFD1,MAK,LCA5,KIF7,DYNC2H1,WDR19,IFT74,BBS12,DYNC2LI1
GO Process	GO:0072359	Circulatory system development	14	872	0.68	0.00011	MKKS,TMEM231,BBS7,ROM1,BBS5,DCHS1,PTCH1,NPHP3,AHI1,MKS1,GLI3,DYNC2H1,C5orf42,IFT74
GO Process	GO:0051904	Pigment granule transport	4	22	1.74	0.00018	MKKS,BBS7,BBS5,MYO7A
GO Process	GO:0060042	Retina morphogenesis in camera-type eye	5	56	1.43	0.00020	USH1C,RPE65,ROM1,CRB1,AHI1
GO Process	GO:0003007	Heart morphogenesis	8	251	0.98	0.00024	MKKS,BBS7,BBS5,DCHS1,PTCH1,NPHP3,AHI1,MKS1
GO Process	GO:0042733	Embryonic digit morphogenesis	5	61	1.39	0.00028	TMEM231,TMEM107,MKS1,GLI3,C5orf42
GO Process	GO:0003407	Neural retina development	5	62	1.39	0.00030	USH1C,RPE65,ROM1,CRB1,AHI1
GO Process	GO:0001947	Heart looping	5	64	1.37	0.00034	MKKS,BBS7,BBS5,NPHP3,AHI1
GO Process	GO:0001822	Kidney development	8	271	0.95	0.00040	WFS1,DCHS1,PTCH1,NPHP3,AHI1,GLI3,C5orf42,CEP290
GO Process	GO:0048593	Camera-type eye morphogenesis	6	121	1.17	0.00041	USH1C,RPE65,ROM1,CRB1,AHI1,GLI3
GO Process	GO:0060831	Smoothened signaling pathway involved in dorsal/ventral neural tube patterning	3	7	2023-11-02	0.00042	PTCH1,GLI3,WDR19
GO Process	GO:0035295	Tube development	13	851	0.66	0.00043	MKKS,BBS7,BBS5,DCHS1,TMEM107,PTCH1,NPHP3,AHI1,GJB2,MKS1,GLI3,WDR19,CEP290
GO Process	GO:0000086	G2/M transition of mitotic cell cycle	6	134	1.13	0.00069	USH1C,CEP41,CEP164,OFD1,CEP290,ALMS1
GO Process	GO:0042462	Eye photoreceptor cell development	4	34	1.55	0.00073	USH1C,CRB1,MYO7A,CEP290
GO Process	GO:0045879	Negative regulation of smoothened signaling pathway	4	34	1.55	0.00073	PTCH1,KIF7,GLI3,GPR161
GO Process	GO:0021532	Neural tube patterning	4	35	1.54	0.00080	TMEM107,PTCH1,GLI3,WDR19
GO Process	GO:0055123	Digestive system development	6	140	2023-11-01	0.00084	BBS7,DCHS1,NPHP3,AHI1,GLI3,WDR19
GO Process	GO:0035721	Intraciliary retrograde transport	3	10	1.96	0.00091	DYNC2H1,WDR19,DYNC2LI1
GO Process	GO:0008277	Regulation of g protein-coupled receptor signaling pathway	6	146	2023-09-01	0.0010	CNGB1,GUCY2D,PDE6A,TUB,CNGA1,PDE6B
GO Process	GO:0060993	Kidney morphogenesis	5	84	1.25	0.0011	DCHS1,PTCH1,NPHP3,AHI1,GLI3
GO Process	GO:0035315	Hair cell differentiation	4	40	1.48	0.0012	USH1C,USH2A,CLRN1,MYO7A
GO Process	GO:0035735	Intraciliary transport involved in cilium assembly	4	40	1.48	0.0012	DYNC2H1,WDR19,IFT74,DYNC2LI1
GO Process	GO:0034613	Cellular protein localization	17	1610	0.5	0.0014	CNGB1,DCHS1,TUB,TMEM107,BBS1,PTCH1,MAK,CRB1,AHI1,LCA5,DYNC2H1,WDR19,MYO7A,C5orf42,IFT74,BBS12,DYNC2LI1
GO Process	GO:0043473	Pigmentation	5	92	1.21	0.0015	MKKS,BBS7,BBS5,GLI3,MYO7A
GO Process	GO:0021915	Neural tube development	6	160	2023-05-01	0.0016	DCHS1,TMEM107,PTCH1,MKS1,GLI3,WDR19
GO Process	GO:0048468	Cell development	17	1629	0.5	0.0016	USH1C,MKKS,CNGB1,DOCK7,RPE65,CLRN1,PTCH1,CRB1,AHI1,MKS1,GLI3,CDH23,MYO7A,IFT74,TRIM32,CEP290,CDHR1
GO Process	GO:0030154	Cell differentiation	27	3702	0.34	0.0020	USH1C,MKKS,CNGB1,DOCK7,TMEM231,RPE65,BBS7,ROM1,GDF6,DCHS1,CEP120,USH2A,CLRN1,PTCH1,MAK,MYO9A,CRB1,AHI1,MKS1,GLI3,DYNC2H1,CDH23,MYO7A,IFT74,TRIM32,CEP290,CDHR1
GO Process	GO:0006928	Movement of cell or subcellular component	16	1501	0.51	0.0022	DCHS1,TUB,CLRN1,PTCH1,NPHP3,OFD1,MAK,LCA5,KIF7,GLI3,DYNC2H1,WDR19,MYO7A,IFT74,BBS12,DYNC2LI1
GO Process	GO:0060563	Neuroepithelial cell differentiation	4	48	2023-04-01	0.0023	USH1C,TMEM231,CLRN1,MYO7A
GO Process	GO:0071482	Cellular response to light stimulus	5	113	2023-12-01	0.0037	CNGB1,PDE6A,CRB1,CNGA1,PDE6B
GO Process	GO:0009987	Cellular process	62	15024	0.09	0.0042	USH1C,CEP41,WFS1,PRPH2,MKKS,CNGB1,DOCK7,GUCY2D,PDE6A,TMEM231,GNB5,RPE65,BBS7,ROM1,CEP164,GDF6,BBS5,DCHS1,CEP120,TUB,USH2A,TMEM107,BBS1,CLRN1,PTCH1,NPHP3,EVC2,OFD1,GJB4,KIAA0586,MAK,MYO9A,CRB1,AHI1,ABCA4,PCDH15,NMNAT1,GJB2,LCA5,MKS1,BBS10,KIF7,GLI3,DYNC2H1,CDH23,WDR19,CNGA1,FAM161A,MYO7A,C5orf42,TMEM67,BEST1,IFT74,TRIM32,PDE6B,BBS12,GPR161,CEP290,RBP3,DYNC2LI1,ALMS1,CDHR1
GO Process	GO:0060322	Head development	11	788	0.62	0.0047	MKKS,DOCK7,BBS7,CEP120,PTCH1,AHI1,MKS1,GLI3,DYNC2H1,C5orf42,CEP290
GO Process	GO:0051877	Pigment granule aggregation in cell center	2	2	2.48	0.0052	MKKS,BBS7
GO Process	GO:0032402	Melanosome transport	3	21	1.63	0.0053	MKKS,BBS7,BBS5
GO Process	GO:0042471	Ear morphogenesis	5	123	2023-09-01	0.0053	USH1C,CLRN1,WDR19,MYO7A,CEP290
GO Process	GO:0051131	Chaperone-mediated protein complex assembly	3	21	1.63	0.0053	MKKS,BBS10,BBS12
GO Process	GO:0065007	Biological regulation	55	12171	0.13	0.0055	USH1C,CEP41,WFS1,MKKS,CNGB1,DOCK7,GUCY2D,PDE6A,TMEM231,GNB5,CSPP1,RPE65,BBS7,ROM1,CEP164,GDF6,DCHS1,CEP120,TUB,USH2A,BBS1,CLRN1,PTCH1,NPHP3,EVC2,OFD1,KIAA0586,MAK,MYO9A,CRB1,AHI1,ABCA4,PCDH15,NMNAT1,LCA5,MKS1,BBS10,KIF7,GLI3,DYNC2H1,CDH23,WDR19,CNGA1,FAM161A,TMEM67,BEST1,IFT74,TRIM32,PDE6B,BBS12,GPR161,CEP290,DYNC2LI1,ALMS1,CDHR1
GO Process	GO:0072078	Nephron tubule morphogenesis	4	64	1.27	0.0059	DCHS1,PTCH1,AHI1,GLI3
GO Process	GO:0048565	Digestive tract development	5	128	2023-07-01	0.0061	BBS7,DCHS1,NPHP3,AHI1,GLI3
GO Process	GO:0051234	Establishment of localization	29	4479	0.29	0.0070	CEP41,MKKS,CNGB1,DOCK7,BBS7,BBS5,CEP120,TUB,USH2A,BBS1,NPHP3,OFD1,GJB4,MAK,AHI1,ABCA4,GJB2,LCA5,DYNC2H1,CDH23,WDR19,CNGA1,MYO7A,BEST1,IFT74,BBS12,CEP290,DYNC2LI1,ALMS1
GO Process	GO:0046907	Intracellular transport	15	1520	0.47	0.0086	MKKS,DOCK7,BBS7,BBS5,CEP120,TUB,MAK,LCA5,DYNC2H1,WDR19,MYO7A,IFT74,BBS12,DYNC2LI1,ALMS1
GO Process	GO:0021846	Cell proliferation in forebrain	3	28	1.51	0.0108	DOCK7,CEP120,GLI3
GO Process	GO:0006810	Transport	28	4353	0.29	0.0111	CEP41,MKKS,CNGB1,DOCK7,BBS7,BBS5,CEP120,TUB,BBS1,NPHP3,OFD1,GJB4,MAK,AHI1,ABCA4,GJB2,LCA5,DYNC2H1,CDH23,WDR19,CNGA1,MYO7A,BEST1,IFT74,BBS12,CEP290,DYNC2LI1,ALMS1
GO Process	GO:0045184	Establishment of protein localization	15	1564	0.46	0.0116	CEP41,BBS7,BBS5,TUB,USH2A,BBS1,MAK,LCA5,DYNC2H1,WDR19,MYO7A,IFT74,BBS12,CEP290,DYNC2LI1
GO Process	GO:0007420	Brain development	10	745	0.61	0.0128	MKKS,DOCK7,BBS7,CEP120,PTCH1,AHI1,GLI3,DYNC2H1,C5orf42,CEP290
GO Process	GO:0042491	Inner ear auditory receptor cell differentiation	3	31	1.46	0.0138	USH1C,CLRN1,MYO7A
GO Process	GO:0009953	Dorsal/ventral pattern formation	4	83	1.16	0.0142	PTCH1,GLI3,DYNC2H1,WDR19
GO Process	GO:0022027	Interkinetic nuclear migration	2	5	2023-08-02	0.0159	DOCK7,CEP120
GO Process	GO:0048496	Maintenance of animal organ identity	2	5	2023-08-02	0.0159	USH2A,NPHP3
GO Process	GO:0021522	Spinal cord motor neuron differentiation	3	35	1.41	0.0189	PTCH1,GLI3,DYNC2H1
GO Process	GO:1990349	Gap junction-mediated intercellular transport	2	6	2.0	0.0207	GJB4,GJB2
GO Process	GO:0065008	Regulation of biological quality	26	4042	0.29	0.0210	USH1C,WFS1,MKKS,CNGB1,DOCK7,PDE6A,RPE65,TUB,USH2A,BBS1,CLRN1,PTCH1,NPHP3,MAK,CRB1,ABCA4,PCDH15,LCA5,MKS1,BBS10,CDH23,TRIM32,PDE6B,BBS12,ALMS1,CDHR1
GO Process	GO:0015031	Protein transport	14	1486	0.45	0.0225	CEP41,BBS7,BBS5,TUB,BBS1,MAK,LCA5,DYNC2H1,WDR19,MYO7A,IFT74,BBS12,CEP290,DYNC2LI1
GO Process	GO:0009628	Response to abiotic stimulus	12	1147	0.5	0.0251	MKKS,CNGB1,PDE6A,RPE65,PTCH1,CRB1,ABCA4,CNGA1,BEST1,TRIM32,PDE6B,EYS
GO Process	GO:0031175	Neuron projection development	9	680	0.6	0.0280	USH1C,DOCK7,CLRN1,PTCH1,MKS1,GLI3,CDH23,MYO7A,TRIM32
GO Process	GO:0042472	Inner ear morphogenesis	4	103	2023-07-01	0.0287	USH1C,CLRN1,MYO7A,CEP290
GO Process	GO:0045444	Fat cell differentiation	4	106	2023-06-01	0.0311	MKKS,BBS7,GDF6,TRIM32
GO Process	GO:0048793	Pronephros development	2	8	1.88	0.0311	AHI1,CEP290
GO Process	GO:0060027	Convergent extension involved in gastrulation	2	8	1.88	0.0311	MKKS,NPHP3
GO Process	GO:1901620	Regulation of smoothened signaling pathway involved in dorsal/ventral neural tube patterning	2	8	1.88	0.0311	MKS1,GPR161
GO Process	GO:1904491	Protein localization to ciliary transition zone	2	8	1.88	0.0311	TMEM107,C5orf42
GO Process	GO:0001658	Branching involved in ureteric bud morphogenesis	3	44	1.31	0.0322	DCHS1,PTCH1,GLI3
GO Process	GO:0001738	Morphogenesis of a polarized epithelium	3	45	2023-03-01	0.0339	MYO9A,AHI1,C5orf42
GO Process	GO:0010824	Regulation of centrosome duplication	3	45	2023-03-01	0.0339	CEP120,TMEM67,ALMS1
GO Process	GO:0010389	Regulation of g2/m transition of mitotic cell cycle	5	198	0.88	0.0351	CEP41,CEP164,OFD1,CEP290,ALMS1
GO Process	GO:0023052	Signaling	30	5239	0.24	0.0395	WFS1,MKKS,CNGB1,DOCK7,GUCY2D,PDE6A,TMEM231,GNB5,RPE65,BBS7,GDF6,DCHS1,PTCH1,NPHP3,EVC2,GJB4,KIAA0586,MAK,MYO9A,CRB1,AHI1,ABCA4,GJB2,MKS1,GLI3,WDR19,CNGA1,IFT74,PDE6B,GPR161
GO Process	GO:0048546	Digestive tract morphogenesis	3	48	1.27	0.0398	BBS7,AHI1,GLI3
GO Process	GO:0071214	Cellular response to abiotic stimulus	6	313	0.76	0.0399	CNGB1,PDE6A,RPE65,CRB1,CNGA1,PDE6B
GO Process	GO:0000902	Cell morphogenesis	9	726	0.57	0.0408	DOCK7,CLRN1,PTCH1,CRB1,GLI3,CDH23,WDR19,MYO7A,CDHR1
GO Process	GO:0009913	Epidermal cell differentiation	6	315	0.76	0.0408	USH1C,USH2A,CLRN1,PTCH1,MYO7A,IFT74
GO Process	GO:0042048	Olfactory behavior	2	10	1.78	0.0419	WFS1,GJB4
GO Process	GO:1903441	Protein localization to ciliary membrane	2	10	1.78	0.0419	TUB,WDR19
GO Process	GO:0060287	Epithelial cilium movement involved in determination of left/right asymmetry	2	11	1.74	0.0487	NPHP3,OFD1
GO Process	GO:0007154	Cell communication	30	5320	0.23	0.0494	WFS1,MKKS,CNGB1,DOCK7,GUCY2D,PDE6A,TMEM231,GNB5,RPE65,BBS7,GDF6,DCHS1,PTCH1,NPHP3,EVC2,GJB4,KIAA0586,MAK,MYO9A,CRB1,AHI1,ABCA4,GJB2,MKS1,GLI3,WDR19,CNGA1,IFT74,PDE6B,GPR161
GO Molecular Function
GO Function	GO:0001103	RNA polymerase II repressing transcription factor binding	5	35	1.63	0.00066	MKKS,BBS7,BBS5,BBS1,BBS10
GO Cellular component
GO Component	GO:0005929	Cilium	46	637	1.34	2.05e-49	USH1C,CEP41,PRPH2,MKKS,CNGB1,GUCY2D,PDE6A,TMEM231,BBS7,ROM1,CEP164,BBS5,TUB,USH2A,TMEM107,BBS1,PTCH1,NPHP3,EVC2,OFD1,KIAA0586,MAK,AHI1,ABCA4,PCDH15,LCA5,MKS1,BBS10,KIF7,GLI3,DYNC2H1,WDR19,CNGA1,FAM161A,MYO7A,C5orf42,TMEM67,IFT74,PDE6B,EYS,BBS12,GPR161,CEP290,DYNC2LI1,ALMS1,CDHR1
GO Component	GO:0042995	Cell projection	54	2287	0.85	1.56e-36	USH1C,IMPG2,CEP41,WFS1,PRPH2,MKKS,CNGB1,DOCK7,GUCY2D,PDE6A,TMEM231,BBS7,ROM1,CEP164,BBS5,TUB,USH2A,TMEM107,BBS1,CLRN1,PTCH1,NPHP3,EVC2,OFD1,KIAA0586,MAK,MYO9A,CRB1,AHI1,ABCA4,PCDH15,GJB2,LCA5,MKS1,BBS10,KIF7,GLI3,DYNC2H1,CDH23,WDR19,CNGA1,FAM161A,MYO7A,C5orf42,TMEM67,IFT74,PDE6B,EYS,BBS12,GPR161,CEP290,DYNC2LI1,ALMS1,CDHR1
GO Component	GO:0120025	Plasma membrane bounded cell projection	53	2193	0.86	4.09e-36	USH1C,CEP41,WFS1,PRPH2,MKKS,CNGB1,DOCK7,GUCY2D,PDE6A,TMEM231,BBS7,ROM1,CEP164,BBS5,TUB,USH2A,TMEM107,BBS1,CLRN1,PTCH1,NPHP3,EVC2,OFD1,KIAA0586,MAK,MYO9A,CRB1,AHI1,ABCA4,PCDH15,GJB2,LCA5,MKS1,BBS10,KIF7,GLI3,DYNC2H1,CDH23,WDR19,CNGA1,FAM161A,MYO7A,C5orf42,TMEM67,IFT74,PDE6B,EYS,BBS12,GPR161,CEP290,DYNC2LI1,ALMS1,CDHR1
GO Component	GO:0097730	Non-motile cilium	22	160	1.62	1.88e-26	USH1C,PRPH2,MKKS,CNGB1,GUCY2D,PDE6A,BBS7,ROM1,USH2A,MAK,AHI1,ABCA4,PCDH15,LCA5,WDR19,CNGA1,FAM161A,MYO7A,PDE6B,EYS,CEP290,CDHR1
GO Component	GO:0097733	Photoreceptor cell cilium	20	115	1.72	9.62e-26	USH1C,PRPH2,CNGB1,GUCY2D,PDE6A,BBS7,ROM1,USH2A,MAK,ABCA4,PCDH15,LCA5,WDR19,CNGA1,FAM161A,MYO7A,PDE6B,EYS,CEP290,CDHR1
GO Component	GO:0001750	Photoreceptor outer segment	16	88	1.74	1.47e-20	USH1C,PRPH2,CNGB1,GUCY2D,PDE6A,BBS7,ROM1,MAK,ABCA4,PCDH15,WDR19,CNGA1,MYO7A,PDE6B,EYS,CDHR1
GO Component	GO:0035869	Ciliary transition zone	14	66	1.81	1.15e-18	TMEM231,USH2A,TMEM107,MAK,AHI1,LCA5,MKS1,WDR19,FAM161A,MYO7A,C5orf42,TMEM67,CEP290,DYNC2LI1
GO Component	GO:0060170	Ciliary membrane	13	72	1.74	1.86e-16	CNGB1,GUCY2D,TMEM231,BBS7,ROM1,BBS5,BBS1,PTCH1,EVC2,CNGA1,TMEM67,GPR161,CDHR1
GO Component	GO:0036064	Ciliary basal body	15	134	1.53	1.98e-16	CEP41,MKKS,BBS7,BBS5,USH2A,BBS1,OFD1,KIAA0586,AHI1,LCA5,MKS1,KIF7,FAM161A,CEP290,DYNC2LI1
GO Component	GO:0005815	Microtubule organizing center	23	761	0.96	3.54e-14	CEP41,MKKS,CSPP1,BBS7,CEP164,BBS5,CEP120,USH2A,BBS1,OFD1,KIAA0586,MAK,AHI1,LCA5,MKS1,KIF7,FAM161A,TMEM67,IFT74,EYS,CEP290,DYNC2LI1,ALMS1
GO Component	GO:0043005	Neuron projection	27	1366	0.77	1.10e-12	USH1C,WFS1,PRPH2,MKKS,CNGB1,DOCK7,GUCY2D,PDE6A,BBS7,ROM1,USH2A,CLRN1,PTCH1,MAK,MYO9A,ABCA4,PCDH15,LCA5,CDH23,WDR19,CNGA1,FAM161A,MYO7A,PDE6B,EYS,CEP290,CDHR1
GO Component	GO:0015630	Microtubule cytoskeleton	25	1219	0.79	6.44e-12	CEP41,MKKS,CSPP1,BBS7,CEP164,BBS5,CEP120,USH2A,BBS1,CLRN1,OFD1,KIAA0586,MAK,AHI1,LCA5,MKS1,KIF7,DYNC2H1,FAM161A,TMEM67,IFT74,EYS,CEP290,DYNC2LI1,ALMS1
GO Component	GO:0005813	Centrosome	18	565	0.98	4.11e-11	CEP41,MKKS,CSPP1,BBS7,CEP164,CEP120,BBS1,OFD1,KIAA0586,MAK,AHI1,MKS1,FAM161A,TMEM67,IFT74,CEP290,DYNC2LI1,ALMS1
GO Component	GO:0005856	Cytoskeleton	31	2221	0.62	4.36e-11	USH1C,CEP41,MKKS,CSPP1,BBS7,CEP164,BBS5,CEP120,USH2A,BBS1,CLRN1,EVC2,OFD1,KIAA0586,MAK,MYO9A,AHI1,LCA5,MKS1,KIF7,GLI3,DYNC2H1,WDR19,FAM161A,MYO7A,TMEM67,IFT74,EYS,CEP290,DYNC2LI1,ALMS1
GO Component	GO:0031253	Cell projection membrane	14	338	2023-01-01	7.78e-10	CNGB1,GUCY2D,TMEM231,BBS7,ROM1,BBS5,USH2A,BBS1,PTCH1,EVC2,CNGA1,TMEM67,GPR161,CDHR1
GO Component	GO:0036038	MKS complex	6	13	2.14	2.73e-09	TMEM231,TMEM107,AHI1,MKS1,TMEM67,CEP290
GO Component	GO:0001917	Photoreceptor inner segment	8	57	1.63	3.80e-09	USH1C,PRPH2,USH2A,KIAA0586,MAK,CRB1,FAM161A,MYO7A
GO Component	GO:0032391	Photoreceptor connecting cilium	7	38	1.74	1.15e-08	USH2A,MAK,LCA5,WDR19,FAM161A,MYO7A,CEP290
GO Component	GO:0032421	Stereocilium bundle	7	58	1.56	1.59e-07	USH1C,MKKS,USH2A,CLRN1,PCDH15,CDH23,MYO7A
GO Component	GO:0097542	Ciliary tip	6	46	1.59	1.52e-06	KIF7,GLI3,DYNC2H1,WDR19,IFT74,DYNC2LI1
GO Component	GO:0005814	Centriole	8	142	1.23	2.60e-06	CEP41,CEP164,CEP120,OFD1,KIAA0586,AHI1,MKS1,CEP290
GO Component	GO:0032420	Stereocilium	6	53	1.53	3.02e-06	USH1C,USH2A,CLRN1,PCDH15,CDH23,MYO7A
GO Component	GO:0005930	Axoneme	7	117	1.26	1.23e-05	BBS7,BBS1,MAK,LCA5,GLI3,DYNC2H1,DYNC2LI1
GO Component	GO:0098590	Plasma membrane region	17	1219	0.62	2.34e-05	CNGB1,GUCY2D,TMEM231,BBS7,ROM1,BBS5,USH2A,BBS1,PTCH1,EVC2,CRB1,CNGA1,MYO7A,TMEM67,BEST1,GPR161,CDHR1
GO Component	GO:0042622	Photoreceptor outer segment membrane	4	15	2023-09-01	2.57e-05	GUCY2D,ROM1,CNGA1,CDHR1
GO Component	GO:0097381	Photoreceptor disc membrane	4	24	2023-07-01	0.00012	GUCY2D,PDE6A,ABCA4,PDE6B
GO Component	GO:0033165	Interphotoreceptor matrix	3	6	2.18	0.00016	IMPG2,EYS,RBP3
GO Component	GO:0002139	Stereocilia coupling link	3	7	2023-11-02	0.00022	USH1C,USH2A,MYO7A
GO Component	GO:0034464	BBSome	3	8	2023-05-02	0.00030	BBS7,BBS5,BBS1
GO Component	GO:0043232	Intracellular non-membrane-bounded organelle	33	4880	0.31	0.00035	USH1C,CEP41,MKKS,CSPP1,BBS7,CEP164,BBS5,CEP120,USH2A,BBS1,CLRN1,EVC2,OFD1,GJB4,KIAA0586,MAK,MYO9A,AHI1,LCA5,MKS1,KIF7,GLI3,DYNC2H1,WDR19,FAM161A,MYO7A,TMEM67,IFT74,TRIM32,EYS,CEP290,DYNC2LI1,ALMS1
GO Component	GO:0098858	Actin-based cell projection	7	214	0.99	0.00039	USH1C,USH2A,CLRN1,CRB1,PCDH15,CDH23,MYO7A
GO Component	GO:0043226	Organelle	59	13515	0.12	0.0014	USH1C,CEP41,WFS1,PRPH2,MKKS,CNGB1,GUCY2D,PDE6A,TMEM231,GNB5,CSPP1,RPE65,BBS7,ROM1,CEP164,BBS5,CEP120,TUB,USH2A,TMEM107,BBS1,CLRN1,PTCH1,NPHP3,EVC2,OFD1,GJB4,KIAA0586,MAK,MYO9A,AHI1,ABCA4,PCDH15,NMNAT1,GJB2,LCA5,MKS1,BBS10,KIF7,GLI3,DYNC2H1,CDH23,WDR19,CNGA1,FAM161A,MYO7A,C5orf42,TMEM67,IFT74,TRIM32,PDE6B,EYS,BBS12,GPR161,CEP290,RBP3,DYNC2LI1,ALMS1,CDHR1
GO Component	GO:0031514	Motile cilium	6	194	0.97	0.0023	MKKS,MAK,DYNC2H1,WDR19,IFT74,DYNC2LI1
GO Component	GO:0045177	Apical part of cell	8	420	0.76	0.0035	USH1C,DCHS1,USH2A,PTCH1,CRB1,DYNC2H1,MYO7A,DYNC2LI1
GO Component	GO:0030990	Intraciliary transport particle	3	26	1.54	0.0049	WDR19,IFT74,DYNC2LI1
GO Component	GO:0005886	Plasma membrane	32	5314	0.26	0.0052	USH1C,PRPH2,CNGB1,GUCY2D,PDE6A,TMEM231,GNB5,RPE65,BBS7,ROM1,BBS5,DCHS1,TUB,USH2A,BBS1,CLRN1,PTCH1,EVC2,GJB4,CRB1,ABCA4,PCDH15,GJB2,DYNC2H1,CDH23,CNGA1,MYO7A,TMEM67,BEST1,PDE6B,GPR161,CDHR1
GO Component	GO:0005902	Microvillus	4	86	1.15	0.0087	USH1C,CLRN1,CRB1,MYO7A
GO Component	GO:0002142	Stereocilia ankle link complex	2	6	2.0	0.0113	USH1C,USH2A
GO Component	GO:0032991	Protein-containing complex	30	5073	0.25	0.0128	USH1C,IMPG2,CNGB1,TMEM231,GNB5,BBS7,CEP164,BBS5,DCHS1,USH2A,TMEM107,BBS1,EVC2,GJB4,MYO9A,CRB1,AHI1,GJB2,MKS1,KIF7,GLI3,DYNC2H1,CDH23,WDR19,MYO7A,TMEM67,BEST1,IFT74,CEP290,DYNC2LI1
GO Component	GO:0016461	Unconventional myosin complex	2	10	1.78	0.0247	MYO9A,MYO7A
Reactome
Reactome	HSA-5617833	Cilium Assembly	20	197	1.49	1.21e-20	CEP41,MKKS,CNGB1,BBS7,CEP164,BBS5,BBS1,NPHP3,OFD1,AHI1,MKS1,BBS10,DYNC2H1,WDR19,TMEM67,IFT74,BBS12,CEP290,DYNC2LI1,ALMS1
Reactome	HSA-2187338	Visual phototransduction	10	99	1.48	1.84e-09	CNGB1,GUCY2D,PDE6A,GNB5,RPE65,ABCA4,CNGA1,MYO7A,PDE6B,RBP3
Reactome	HSA-5620920	Cargo trafficking to the periciliary membrane	8	50	1.68	8.45e-09	MKKS,CNGB1,BBS7,BBS5,BBS1,NPHP3,BBS10,BBS12
Reactome	HSA-5620922	BBSome-mediated cargo-targeting to cilium	6	22	1.91	1.61e-07	MKKS,BBS7,BBS5,BBS1,BBS10,BBS12
Reactome	HSA-5358351	Signaling by Hedgehog	9	146	1.27	7.26e-07	PTCH1,EVC2,OFD1,MKS1,KIF7,GLI3,DYNC2H1,WDR19,GPR161
Reactome	HSA-5620912	Anchoring of the basal body to the plasma membrane	8	97	1.39	7.26e-07	CEP41,CEP164,OFD1,AHI1,MKS1,TMEM67,CEP290,ALMS1
Reactome	HSA-2514859	Inactivation, recovery and regulation of the phototransduction cascade	6	33	1.74	8.46e-07	CNGB1,GUCY2D,PDE6A,GNB5,CNGA1,PDE6B
Reactome	HSA-5610787	Hedgehog off state	8	110	1.34	1.10e-06	PTCH1,OFD1,MKS1,KIF7,GLI3,DYNC2H1,WDR19,GPR161
Reactome	HSA-2485179	Activation of the phototransduction cascade	4	11	2023-04-02	2.87e-05	CNGB1,PDE6A,CNGA1,PDE6B
Reactome	HSA-2453902	The canonical retinoid cycle in rods (twilight vision)	4	23	1.72	0.00030	RPE65,ABCA4,MYO7A,RBP3
Reactome	HSA-380259	Loss of Nlp from mitotic centrosomes	5	69	1.34	0.00071	CEP41,CEP164,OFD1,CEP290,ALMS1
Reactome	HSA-8854518	AURKA Activation by TPX2	5	72	1.32	0.00076	CEP41,CEP164,OFD1,CEP290,ALMS1
Reactome	HSA-380270	Recruitment of mitotic centrosome proteins and complexes	5	80	1.27	0.0012	CEP41,CEP164,OFD1,CEP290,ALMS1
Reactome	HSA-5632684	Hedgehog on state	5	83	1.26	0.0012	PTCH1,EVC2,KIF7,GLI3,GPR161
Reactome	HSA-2565942	Regulation of PLK1 Activity at G2/M Transition	5	87	1.24	0.0015	CEP41,CEP164,OFD1,CEP290,ALMS1
Reactome	HSA-380320	Recruitment of NuMA to mitotic centrosomes	5	93	1.21	0.0019	CEP41,CEP164,OFD1,CEP290,ALMS1
Reactome	HSA-5620924	Intraflagellar transport	4	51	1.37	0.0032	DYNC2H1,WDR19,IFT74,DYNC2LI1
Reactome	HSA-162582	Signal Transduction	21	2741	0.36	0.0135	CNGB1,DOCK7,GUCY2D,PDE6A,GNB5,RPE65,PTCH1,EVC2,OFD1,MYO9A,ABCA4,MKS1,KIF7,GLI3,DYNC2H1,WDR19,CNGA1,MYO7A,PDE6B,GPR161,RBP3

## Sheet: Enrichment subnetwork3
#category	term ID	term description	observed gene count	background gene count	strength	false discovery rate	matching proteins in your network (labels)
GO Biological Process
GO Process	GO:0042391	Regulation of membrane potential	18	440	1.29	4.88e-15	HCN4,CNTNAP1,KCTD7,CACNA1D,SCN1A,KCND3,ANK2,CACNA1A,RYR2,KCNQ3,DLG4,SCN9A,RELN,MECP2,GRIA1,SHANK2,GRIN2B,GJA5
GO Process	GO:0034765	Regulation of ion transmembrane transport	15	477	1.18	1.78e-10	HCN4,CACNA1D,SCN1A,KCND3,ANK2,CACNA1A,RYR2,KCNQ3,DLG4,SCN9A,RELN,GRIA1,SHANK2,GRIN2B,GJA5
GO Process	GO:0035637	Multicellular organismal signaling	10	137	1.54	1.14e-09	HCN4,CNTNAP1,CACNA1D,SCN1A,KCND3,ANK2,CNTNAP2,RYR2,SCN9A,GJA5
GO Process	GO:0043269	Regulation of ion transport	16	696	2023-04-01	1.14e-09	HCN4,CACNA1D,SCN1A,HOMER2,KCND3,ANK2,CACNA1A,RYR2,KCNQ3,DLG4,SCN9A,RELN,GRIA1,SHANK2,GRIN2B,GJA5
GO Process	GO:0001508	Action potential	9	97	1.65	1.70e-09	HCN4,CNTNAP1,CACNA1D,SCN1A,KCND3,ANK2,RYR2,SCN9A,GJA5
GO Process	GO:0006812	Cation transport	17	881	0.96	1.70e-09	HCN4,CACNA1D,KCNT2,SCN1A,ABCC8,ITPR1,KCND3,ANK2,CACNA1A,RYR2,KCNT1,KCNQ3,SCN9A,UNC80,GRIA1,GRIN2B,GJA5
GO Process	GO:0030001	Metal ion transport	15	666	2023-03-01	4.88e-09	HCN4,CACNA1D,KCNT2,SCN1A,ABCC8,ITPR1,KCND3,ANK2,CACNA1A,RYR2,KCNT1,KCNQ3,SCN9A,GRIN2B,GJA5
GO Process	GO:0051049	Regulation of transport	21	1776	0.75	9.08e-09	HCN4,KCTD7,CACNA1D,SCN1A,ABCC8,HOMER2,ITPR1,KCND3,OXTR,ANK2,CACNA1A,RYR2,KCNQ3,DLG4,SCN9A,RELN,GRIA1,PRRT2,SHANK2,GRIN2B,GJA5
GO Process	GO:0086001	Cardiac muscle cell action potential	7	50	1.82	2.91e-08	HCN4,CACNA1D,SCN1A,KCND3,ANK2,RYR2,GJA5
GO Process	GO:0003008	System process	21	1942	0.71	3.68e-08	HCN4,CNTNAP1,CACNA1D,SCN1A,HOMER2,KCND3,OXTR,ANK2,CNTNAP2,RYR2,DLG4,FBXO11,SCN9A,RELN,MECP2,GRIA1,NRXN3,PRRT2,SHANK2,GRIN2B,GJA5
GO Process	GO:0098662	Inorganic cation transmembrane transport	13	628	0.99	3.24e-07	HCN4,CACNA1D,KCNT2,SCN1A,ABCC8,ITPR1,KCND3,CACNA1A,RYR2,KCNT1,KCNQ3,SCN9A,GRIN2B
GO Process	GO:0086002	Cardiac muscle cell action potential involved in contraction	6	39	1.87	4.02e-07	CACNA1D,SCN1A,KCND3,ANK2,RYR2,GJA5
GO Process	GO:0065008	Regulation of biological quality	27	4042	0.5	4.62e-07	HCN4,CNTNAP1,KCTD7,CACNA1D,SCN1A,ABCC8,HOMER2,ITPR1,KCND3,PNKP,OXTR,ANK2,CACNA1A,RYR2,SPTAN1,CDKL5,KCNQ3,DLG4,SCN9A,UNC80,RELN,MECP2,GRIA1,PRRT2,SHANK2,GRIN2B,GJA5
GO Process	GO:0050806	Positive regulation of synaptic transmission	8	147	1.41	6.76e-07	CACNA1D,OXTR,DLG4,RELN,MECP2,PRRT2,SHANK2,GRIN2B
GO Process	GO:0007610	Behavior	12	572	1.0	9.76e-07	SCN1A,HOMER2,OXTR,CNTNAP2,DLG4,SCN9A,RELN,MECP2,GRIA1,NRXN3,SHANK2,GRIN2B
GO Process	GO:0035176	Social behavior	6	49	1.77	9.76e-07	OXTR,CNTNAP2,DLG4,MECP2,NRXN3,SHANK2
GO Process	GO:0044057	Regulation of system process	12	592	0.99	1.22e-06	HCN4,CACNA1D,ITPR1,KCND3,OXTR,ANK2,RYR2,DLG4,RELN,MECP2,SHANK2,GJA5
GO Process	GO:0051899	Membrane depolarization	6	53	1.73	1.22e-06	HCN4,CACNA1D,SCN1A,ANK2,CACNA1A,SCN9A
GO Process	GO:0032879	Regulation of localization	22	2740	0.58	1.39e-06	HCN4,KCTD7,CACNA1D,SCN1A,ABCC8,HOMER2,ITPR1,KCND3,OXTR,ANK2,CACNA1A,RYR2,KCNQ3,DLG4,SCN9A,RELN,MECP2,GRIA1,PRRT2,SHANK2,GRIN2B,GJA5
GO Process	GO:0007611	Learning or memory	9	259	1.22	1.66e-06	OXTR,CNTNAP2,DLG4,RELN,MECP2,GRIA1,NRXN3,SHANK2,GRIN2B
GO Process	GO:0050801	Ion homeostasis	13	796	0.89	2.44e-06	HCN4,KCTD7,CACNA1D,ITPR1,OXTR,ANK2,CACNA1A,RYR2,DLG4,UNC80,GRIA1,GRIN2B,GJA5
GO Process	GO:0050877	Nervous system process	16	1352	0.75	2.44e-06	CNTNAP1,CACNA1D,SCN1A,HOMER2,OXTR,CNTNAP2,DLG4,FBXO11,SCN9A,RELN,MECP2,GRIA1,NRXN3,PRRT2,SHANK2,GRIN2B
GO Process	GO:0086019	Cell-cell signaling involved in cardiac conduction	5	27	1.95	2.49e-06	HCN4,CACNA1D,ANK2,RYR2,GJA5
GO Process	GO:0032409	Regulation of transporter activity	9	281	1.18	2.78e-06	KCTD7,CACNA1D,ANK2,RYR2,DLG4,RELN,GRIA1,SHANK2,GRIN2B
GO Process	GO:0086015	SA node cell action potential	4	8	2.38	3.13e-06	HCN4,CACNA1D,ANK2,GJA5
GO Process	GO:0086010	Membrane depolarization during action potential	5	30	2023-09-01	3.53e-06	HCN4,CACNA1D,SCN1A,ANK2,SCN9A
GO Process	GO:0050804	Modulation of chemical synaptic transmission	10	446	2023-03-01	8.13e-06	CACNA1D,OXTR,CACNA1A,DLG4,RELN,MECP2,GRIA1,PRRT2,SHANK2,GRIN2B
GO Process	GO:0051179	Localization	29	5591	0.39	8.84e-06	HCN4,CNTNAP1,CACNA1D,KCNT2,SCN1A,ABCC8,COG8,ITPR1,RBFOX1,KCND3,OXTR,ANK2,CACNA1A,CNTNAP2,RYR2,KCNT1,SPTAN1,ARX,CDKL5,KCNQ3,DLG4,SCN9A,UNC80,RELN,MECP2,GRIA1,PRRT2,GRIN2B,GJA5
GO Process	GO:0086091	Regulation of heart rate by cardiac conduction	5	38	2023-08-01	8.84e-06	HCN4,CACNA1D,KCND3,ANK2,GJA5
GO Process	GO:0048878	Chemical homeostasis	14	1124	0.77	1.09e-05	HCN4,KCTD7,CACNA1D,HOMER2,ITPR1,OXTR,ANK2,CACNA1A,RYR2,DLG4,UNC80,GRIA1,GRIN2B,GJA5
GO Process	GO:0006936	Muscle contraction	8	248	1.19	1.39e-05	HCN4,CACNA1D,SCN1A,KCND3,OXTR,ANK2,RYR2,GJA5
GO Process	GO:0061337	Cardiac conduction	6	94	1.48	1.58e-05	HCN4,CACNA1D,KCND3,ANK2,RYR2,GJA5
GO Process	GO:0032412	Regulation of ion transmembrane transporter activity	8	260	1.17	1.86e-05	CACNA1D,ANK2,RYR2,DLG4,RELN,GRIA1,SHANK2,GRIN2B
GO Process	GO:0002027	Regulation of heart rate	6	99	1.46	2.00e-05	HCN4,CACNA1D,KCND3,ANK2,RYR2,GJA5
GO Process	GO:0050884	Neuromuscular process controlling posture	4	16	2023-08-02	2.00e-05	CNTNAP1,SCN1A,MECP2,PRRT2
GO Process	GO:0006813	Potassium ion transport	7	174	1.28	2.17e-05	HCN4,KCNT2,ABCC8,KCND3,KCNT1,KCNQ3,GJA5
GO Process	GO:0071625	Vocalization behavior	4	17	2023-05-02	2.24e-05	CNTNAP2,DLG4,NRXN3,SHANK2
GO Process	GO:0008015	Blood circulation	9	394	2023-04-01	2.69e-05	HCN4,CACNA1D,SCN1A,KCND3,OXTR,ANK2,RYR2,MECP2,GJA5
GO Process	GO:0048167	Regulation of synaptic plasticity	7	191	1.24	3.59e-05	DLG4,RELN,MECP2,GRIA1,PRRT2,SHANK2,GRIN2B
GO Process	GO:1903522	Regulation of blood circulation	8	292	2023-12-01	3.67e-05	HCN4,CACNA1D,ITPR1,KCND3,OXTR,ANK2,RYR2,GJA5
GO Process	GO:0055080	Cation homeostasis	11	712	0.87	3.86e-05	KCTD7,CACNA1D,ITPR1,OXTR,ANK2,CACNA1A,RYR2,DLG4,UNC80,GRIA1,GRIN2B
GO Process	GO:0006875	Cellular metal ion homeostasis	10	565	0.93	4.39e-05	KCTD7,CACNA1D,ITPR1,OXTR,ANK2,CACNA1A,RYR2,DLG4,GRIA1,GRIN2B
GO Process	GO:0086005	Ventricular cardiac muscle cell action potential	4	22	1.94	4.78e-05	KCND3,ANK2,RYR2,GJA5
GO Process	GO:0015672	Monovalent inorganic cation transport	9	441	0.99	5.72e-05	HCN4,KCNT2,SCN1A,ABCC8,KCND3,KCNT1,KCNQ3,SCN9A,GJA5
GO Process	GO:1900449	Regulation of glutamate receptor signaling pathway	5	63	1.58	5.72e-05	DLG4,RELN,GRIA1,SHANK2,GRIN2B
GO Process	GO:0006874	Cellular calcium ion homeostasis	9	442	0.99	5.73e-05	CACNA1D,ITPR1,OXTR,ANK2,CACNA1A,RYR2,DLG4,GRIA1,GRIN2B
GO Process	GO:0030534	Adult behavior	6	136	1.32	8.66e-05	SCN1A,HOMER2,CNTNAP2,MECP2,NRXN3,SHANK2
GO Process	GO:0086046	Membrane depolarization during sa node cell action potential	3	5	2.46	8.66e-05	HCN4,CACNA1D,ANK2
GO Process	GO:1904062	Regulation of cation transmembrane transport	8	337	2023-05-01	8.71e-05	CACNA1D,ANK2,RYR2,DLG4,RELN,GRIA1,SHANK2,GRIN2B
GO Process	GO:0051480	Regulation of cytosolic calcium ion concentration	8	340	2023-05-01	9.17e-05	CACNA1D,ITPR1,OXTR,CACNA1A,RYR2,DLG4,GRIA1,GRIN2B
GO Process	GO:0098901	Regulation of cardiac muscle cell action potential	4	28	1.83	9.71e-05	HCN4,ANK2,RYR2,GJA5
GO Process	GO:0007612	Learning	6	145	2023-03-01	0.00011	CNTNAP2,DLG4,RELN,MECP2,NRXN3,SHANK2
GO Process	GO:0098910	Regulation of atrial cardiac muscle cell action potential	3	6	2.38	0.00012	ANK2,RYR2,GJA5
GO Process	GO:0008016	Regulation of heart contraction	7	245	1.13	0.00013	HCN4,CACNA1D,ITPR1,KCND3,ANK2,RYR2,GJA5
GO Process	GO:0099601	Regulation of neurotransmitter receptor activity	5	78	1.49	0.00013	DLG4,RELN,GRIA1,SHANK2,GRIN2B
GO Process	GO:0051234	Establishment of localization	24	4479	0.41	0.00015	HCN4,CACNA1D,KCNT2,SCN1A,ABCC8,COG8,ITPR1,RBFOX1,KCND3,OXTR,ANK2,CACNA1A,RYR2,KCNT1,SPTAN1,KCNQ3,DLG4,SCN9A,UNC80,MECP2,GRIA1,PRRT2,GRIN2B,GJA5
GO Process	GO:0031175	Neuron projection development	10	680	0.85	0.00017	CNTNAP1,TBC1D24,CNTNAP2,SPTAN1,ARX,DLG4,RELN,MECP2,NRXN3,SHANK2
GO Process	GO:2000310	Regulation of nmda receptor activity	4	36	1.72	0.00021	DLG4,RELN,GRIA1,GRIN2B
GO Process	GO:0086004	Regulation of cardiac muscle cell contraction	4	37	1.71	0.00023	HCN4,ANK2,RYR2,GJA5
GO Process	GO:2001257	Regulation of cation channel activity	6	177	1.21	0.00030	ANK2,DLG4,RELN,GRIA1,SHANK2,GRIN2B
GO Process	GO:0007268	Chemical synaptic transmission	8	418	0.96	0.00033	CACNA1D,CACNA1A,KCNQ3,DLG4,MECP2,GRIA1,PRRT2,GRIN2B
GO Process	GO:0006810	Transport	23	4353	0.4	0.00037	HCN4,CACNA1D,KCNT2,SCN1A,ABCC8,COG8,ITPR1,RBFOX1,KCND3,OXTR,ANK2,CACNA1A,RYR2,KCNT1,SPTAN1,KCNQ3,SCN9A,UNC80,MECP2,GRIA1,PRRT2,GRIN2B,GJA5
GO Process	GO:0007267	Cell-cell signaling	12	1145	0.7	0.00037	HCN4,CACNA1D,ANK2,CACNA1A,RYR2,KCNQ3,DLG4,MECP2,GRIA1,PRRT2,GRIN2B,GJA5
GO Process	GO:0007204	Positive regulation of cytosolic calcium ion concentration	7	297	2023-05-01	0.00038	CACNA1D,ITPR1,OXTR,CACNA1A,RYR2,DLG4,GRIN2B
GO Process	GO:0060291	Long-term synaptic potentiation	4	44	1.64	0.00039	RELN,MECP2,SHANK2,GRIN2B
GO Process	GO:0050905	Neuromuscular process	5	109	1.34	0.00050	CNTNAP1,SCN1A,DLG4,MECP2,PRRT2
GO Process	GO:0032989	Cellular component morphogenesis	9	614	0.84	0.00056	CNTNAP1,ANK2,CNTNAP2,SPTAN1,ARX,DLG4,RELN,NRXN3,SHANK2
GO Process	GO:0023052	Signaling	25	5239	0.36	0.00057	HCN4,CNTNAP1,DOCK3,CACNA1D,SCN1A,HOMER2,ITPR1,KCND3,OXTR,ANK2,CACNA1A,CNTNAP2,RYR2,SPTAN1,KCNQ3,DLG4,DEPDC5,SCN9A,RELN,MECP2,GRIA1,NRXN3,PRRT2,GRIN2B,GJA5
GO Process	GO:0032501	Multicellular organismal process	29	6933	0.3	0.00057	HCN4,CNTNAP1,CACNA1D,TBC1D24,SCN1A,HOMER2,ITPR1,RBFOX1,KCND3,OXTR,ANK2,CNTNAP2,RYR2,SPTAN1,PCDH19,ARX,CDKL5,DLG4,FBXO11,SCN9A,TET3,RELN,MECP2,GRIA1,NRXN3,PRRT2,SHANK2,GRIN2B,GJA5
GO Process	GO:0019226	Transmission of nerve impulse	4	54	1.55	0.00077	CNTNAP1,SCN1A,CNTNAP2,SCN9A
GO Process	GO:0048812	Neuron projection morphogenesis	8	495	0.89	0.00095	CNTNAP1,CNTNAP2,SPTAN1,ARX,DLG4,RELN,NRXN3,SHANK2
GO Process	GO:0007399	Nervous system development	16	2371	0.51	0.0013	CNTNAP1,TBC1D24,RBFOX1,OXTR,ANK2,CNTNAP2,SPTAN1,PCDH19,ARX,CDKL5,DLG4,RELN,MECP2,NRXN3,SHANK2,GRIN2B
GO Process	GO:1903779	Regulation of cardiac conduction	4	68	1.45	0.0017	ITPR1,ANK2,RYR2,GJA5
GO Process	GO:0006816	Calcium ion transport	6	259	2023-04-01	0.0019	CACNA1D,ITPR1,ANK2,CACNA1A,RYR2,GRIN2B
GO Process	GO:0009987	Cellular process	41	15024	0.11	0.0022	PNPO,HCN4,CNTNAP1,DOCK3,KCTD7,CACNA1D,TBC1D24,KCNT2,SCN1A,ABCC8,COG8,HOMER2,ITPR1,RBFOX1,KCND3,PNKP,OXTR,ANK2,CACNA1A,CNTNAP2,RYR2,KCNT1,SPTAN1,PCDH19,ARX,CDKL5,KCNQ3,DLG4,DEPDC5,FBXO11,SCN9A,TET3,UNC80,RELN,MECP2,GRIA1,NRXN3,PRRT2,SHANK2,GRIN2B,GJA5
GO Process	GO:0006937	Regulation of muscle contraction	5	162	1.17	0.0027	HCN4,OXTR,ANK2,RYR2,GJA5
GO Process	GO:0007154	Cell communication	24	5320	0.33	0.0027	HCN4,CNTNAP1,DOCK3,CACNA1D,SCN1A,HOMER2,ITPR1,OXTR,ANK2,CACNA1A,CNTNAP2,RYR2,SPTAN1,KCNQ3,DLG4,DEPDC5,SCN9A,RELN,MECP2,GRIA1,NRXN3,PRRT2,GRIN2B,GJA5
GO Process	GO:0098907	Regulation of sa node cell action potential	2	2	2.68	0.0027	ANK2,RYR2
GO Process	GO:0019722	Calcium-mediated signaling	5	165	1.16	0.0028	HOMER2,ITPR1,ANK2,RYR2,GRIN2B
GO Process	GO:0051968	Positive regulation of synaptic transmission, glutamatergic	3	26	1.74	0.0031	OXTR,RELN,SHANK2
GO Process	GO:0099623	Regulation of cardiac muscle cell membrane repolarization	3	26	1.74	0.0031	CACNA1D,ANK2,GJA5
GO Process	GO:2000463	Positive regulation of excitatory postsynaptic potential	3	28	1.71	0.0037	DLG4,RELN,SHANK2
GO Process	GO:0098904	Regulation of av node cell action potential	2	3	2023-05-02	0.0042	RYR2,GJA5
GO Process	GO:0007616	Long-term memory	3	34	1.62	0.0061	RELN,MECP2,GRIA1
GO Process	GO:0034330	Cell junction organization	7	493	0.83	0.0068	CNTNAP1,ANK2,DLG4,RELN,MECP2,SHANK2,GJA5
GO Process	GO:0071205	Protein localization to juxtaparanode region of axon	2	5	2.28	0.0083	CNTNAP1,CNTNAP2
GO Process	GO:0016358	Dendrite development	4	112	1.23	0.0092	DLG4,RELN,MECP2,SHANK2
GO Process	GO:0032411	Positive regulation of transporter activity	4	113	1.23	0.0094	KCTD7,ANK2,RYR2,RELN
GO Process	GO:0021800	Cerebral cortex tangential migration	2	6	2023-02-02	0.0108	ARX,RELN
GO Process	GO:0086068	Purkinje myocyte to ventricular cardiac muscle cell communication	2	6	2023-02-02	0.0108	RYR2,GJA5
GO Process	GO:0060999	Positive regulation of dendritic spine development	3	44	1.51	0.0113	CDKL5,RELN,SHANK2
GO Process	GO:0007215	Glutamate receptor signaling pathway	3	45	2023-05-01	0.0119	HOMER2,GRIA1,GRIN2B
GO Process	GO:0007613	Memory	4	122	1.19	0.0119	OXTR,RELN,MECP2,GRIA1
GO Process	GO:0007420	Brain development	8	745	0.71	0.0121	OXTR,CNTNAP2,PCDH19,ARX,RELN,MECP2,SHANK2,GRIN2B
GO Process	GO:0030913	Paranodal junction assembly	2	7	2.13	0.0129	CNTNAP1,ANK2
GO Process	GO:0007417	Central nervous system development	9	988	0.64	0.0149	CNTNAP1,OXTR,CNTNAP2,PCDH19,ARX,RELN,MECP2,SHANK2,GRIN2B
GO Process	GO:0006928	Movement of cell or subcellular component	11	1501	0.54	0.0169	CACNA1D,SCN1A,KCND3,ANK2,RYR2,SPTAN1,ARX,CDKL5,RELN,NRXN3,GJA5
GO Process	GO:0019227	Neuronal action potential propagation	2	9	2023-03-02	0.0192	CNTNAP1,SCN1A
GO Process	GO:0060081	Membrane hyperpolarization	2	9	2023-03-02	0.0192	KCTD7,KCNQ3
GO Process	GO:0072578	Neurotransmitter-gated ion channel clustering	2	9	2023-03-02	0.0192	DLG4,RELN
GO Process	GO:0048699	Generation of neurons	11	1551	0.53	0.0216	CNTNAP1,TBC1D24,CNTNAP2,SPTAN1,ARX,CDKL5,DLG4,RELN,MECP2,NRXN3,SHANK2
GO Process	GO:0044093	Positive regulation of molecular function	12	1842	0.49	0.0229	DOCK3,KCTD7,CACNA1D,TBC1D24,PNKP,ANK2,RYR2,CDKL5,DLG4,DEPDC5,RELN,GRIN2B
GO Process	GO:0034329	Cell junction assembly	5	280	0.93	0.0243	CNTNAP1,ANK2,MECP2,SHANK2,GJA5
GO Process	GO:1903530	Regulation of secretion by cell	7	630	0.72	0.0250	CACNA1D,ABCC8,ITPR1,OXTR,CACNA1A,PRRT2,GJA5
GO Process	GO:0048667	Cell morphogenesis involved in neuron differentiation	6	445	0.81	0.0255	SPTAN1,ARX,DLG4,RELN,NRXN3,SHANK2
GO Process	GO:2000302	Positive regulation of synaptic vesicle exocytosis	2	12	2023-09-01	0.0298	CACNA1D,PRRT2
GO Process	GO:0010646	Regulation of cell communication	17	3514	0.36	0.0303	CACNA1D,ABCC8,HOMER2,ITPR1,OXTR,ANK2,CACNA1A,RYR2,DLG4,DEPDC5,RELN,MECP2,GRIA1,PRRT2,SHANK2,GRIN2B,GJA5
GO Process	GO:0048468	Cell development	11	1629	0.51	0.0311	CNTNAP1,TBC1D24,ANK2,CNTNAP2,SPTAN1,ARX,DLG4,RELN,MECP2,NRXN3,SHANK2
GO Process	GO:0061098	Positive regulation of protein tyrosine kinase activity	3	66	1.34	0.0311	DOCK3,DLG4,RELN
GO Process	GO:0007275	Multicellular organism development	21	5023	0.3	0.0312	CNTNAP1,TBC1D24,ITPR1,RBFOX1,OXTR,ANK2,CNTNAP2,RYR2,SPTAN1,PCDH19,ARX,CDKL5,DLG4,SCN9A,TET3,RELN,MECP2,NRXN3,SHANK2,GRIN2B,GJA5
GO Process	GO:0099566	Regulation of postsynaptic cytosolic calcium ion concentration	2	13	1.87	0.0329	ITPR1,GRIA1
GO Process	GO:0023051	Regulation of signaling	17	3553	0.36	0.0332	CACNA1D,ABCC8,HOMER2,ITPR1,OXTR,ANK2,CACNA1A,RYR2,DLG4,DEPDC5,RELN,MECP2,GRIA1,PRRT2,SHANK2,GRIN2B,GJA5
GO Process	GO:0033555	Multicellular organismal response to stress	3	71	2023-03-01	0.0364	SCN9A,RELN,MECP2
GO Process	GO:1903524	Positive regulation of blood circulation	3	71	2023-03-01	0.0364	OXTR,RYR2,GJA5
GO Process	GO:0070296	Sarcoplasmic reticulum calcium ion transport	2	14	1.83	0.0365	ANK2,RYR2
GO Process	GO:0050954	Sensory perception of mechanical stimulus	4	175	2023-04-01	0.0377	CACNA1D,SCN1A,HOMER2,FBXO11
GO Process	GO:0086066	Atrial cardiac muscle cell to av node cell communication	2	15	2023-08-01	0.0406	ANK2,GJA5
GO Process	GO:0097623	Potassium ion export across plasma membrane	2	15	2023-08-01	0.0406	KCNT2,KCND3
GO Process	GO:0099171	Presynaptic modulation of chemical synaptic transmission	2	15	2023-08-01	0.0406	CACNA1D,PRRT2
GO Process	GO:0050796	Regulation of insulin secretion	4	182	2023-02-01	0.0421	CACNA1D,ABCC8,ITPR1,CACNA1A
GO Process	GO:0019233	Sensory perception of pain	3	78	1.26	0.0444	SCN1A,SCN9A,MECP2
GO Process	GO:0086064	Cell communication by electrical coupling involved in cardiac conduction	2	16	1.78	0.0444	RYR2,GJA5
GO Process	GO:0097106	Postsynaptic density organization	2	16	1.78	0.0444	RELN,SHANK2
GO Process	GO:0097553	Calcium ion transmembrane import into cytosol	3	78	1.26	0.0444	ITPR1,RYR2,GRIN2B
GO Process	GO:0050708	Regulation of protein secretion	5	333	0.86	0.0450	CACNA1D,ABCC8,ITPR1,CACNA1A,GJA5
GO Process	GO:0060292	Long-term synaptic depression	2	17	1.75	0.0480	GRIA1,SHANK2
GO Process	GO:0060997	Dendritic spine morphogenesis	2	17	1.75	0.0480	DLG4,SHANK2
GO Molecular Function
GO Function	GO:0005261	Cation channel activity	15	326	1.34	4.04e-13	HCN4,CACNA1D,KCNT2,SCN1A,ABCC8,ITPR1,KCND3,CACNA1A,RYR2,KCNT1,KCNQ3,SCN9A,UNC80,GRIA1,GRIN2B
GO Function	GO:0015267	Channel activity	16	471	1.21	1.55e-12	HCN4,CACNA1D,KCNT2,SCN1A,ABCC8,ITPR1,KCND3,CACNA1A,RYR2,KCNT1,KCNQ3,SCN9A,UNC80,GRIA1,GRIN2B,GJA5
GO Function	GO:0022836	Gated channel activity	13	332	1.27	9.06e-11	HCN4,CACNA1D,KCNT2,SCN1A,ITPR1,KCND3,CACNA1A,RYR2,KCNT1,KCNQ3,SCN9A,GRIA1,GRIN2B
GO Function	GO:0046873	Metal ion transmembrane transporter activity	13	427	1.16	1.24e-09	HCN4,CACNA1D,KCNT2,SCN1A,ABCC8,ITPR1,KCND3,CACNA1A,RYR2,KCNT1,KCNQ3,SCN9A,GRIN2B
GO Function	GO:0005244	Voltage-gated ion channel activity	10	194	1.39	3.63e-09	HCN4,CACNA1D,KCNT2,SCN1A,KCND3,CACNA1A,KCNT1,KCNQ3,SCN9A,GRIN2B
GO Function	GO:0022843	Voltage-gated cation channel activity	8	137	1.45	1.32e-07	HCN4,CACNA1D,KCNT2,KCND3,CACNA1A,KCNT1,KCNQ3,GRIN2B
GO Function	GO:0005267	Potassium channel activity	6	123	1.37	5.43e-05	HCN4,KCNT2,ABCC8,KCND3,KCNT1,KCNQ3
GO Function	GO:0005249	Voltage-gated potassium channel activity	5	86	1.44	0.00022	HCN4,KCNT2,KCND3,KCNT1,KCNQ3
GO Function	GO:0015077	Monovalent inorganic cation transmembrane transporter activity	8	381	1.0	0.00022	HCN4,KCNT2,SCN1A,ABCC8,KCND3,KCNT1,KCNQ3,SCN9A
GO Function	GO:0099094	Ligand-gated cation channel activity	5	101	1.37	0.00044	HCN4,ITPR1,RYR2,GRIA1,GRIN2B
GO Function	GO:0015271	Outward rectifier potassium channel activity	3	12	2023-08-02	0.00058	KCNT2,KCND3,KCNT1
GO Function	GO:0005262	Calcium channel activity	5	114	1.32	0.00070	CACNA1D,ITPR1,CACNA1A,RYR2,GRIN2B
GO Function	GO:0019904	Protein domain specific binding	9	716	0.78	0.0019	CNTNAP1,DOCK3,HOMER2,DLG4,MECP2,GRIA1,PRRT2,SHANK2,GJA5
GO Function	GO:0005248	Voltage-gated sodium channel activity	3	23	1.79	0.0026	HCN4,SCN1A,SCN9A
GO Function	GO:0099604	Ligand-gated calcium channel activity	3	23	1.79	0.0026	ITPR1,RYR2,GRIN2B
GO Function	GO:0005228	Intracellular sodium activated potassium channel activity	2	2	2.68	0.0028	KCNT2,KCNT1
GO Function	GO:0005217	Intracellular ligand-gated ion channel activity	3	29	1.69	0.0042	HCN4,ITPR1,RYR2
GO Function	GO:0030160	Synaptic receptor adaptor activity	2	3	2023-05-02	0.0043	HOMER2,SHANK2
GO Function	GO:0097109	Neuroligin family protein binding	2	5	2.28	0.0087	DLG4,NRXN3
GO Function	GO:0035254	Glutamate receptor binding	3	46	1.49	0.0135	HOMER2,DLG4,SHANK2
GO Function	GO:0017124	SH3 domain binding	4	129	1.17	0.0152	CNTNAP1,DOCK3,PRRT2,SHANK2
GO Function	GO:0008331	High voltage-gated calcium channel activity	2	8	2023-08-02	0.0166	CACNA1D,CACNA1A
GO Function	GO:0044325	Ion channel binding	4	134	1.15	0.0166	ABCC8,KCND3,ANK2,RYR2
GO Function	GO:0001540	Amyloid-beta binding	3	76	1.28	0.0499	CACNA1A,GRIA1,GRIN2B
GO Cellular component
GO Component	GO:0034703	Cation channel complex	14	214	1.49	2.51e-14	HCN4,CACNA1D,SCN1A,ABCC8,KCND3,CACNA1A,CNTNAP2,RYR2,KCNQ3,DLG4,SCN9A,UNC80,GRIA1,GRIN2B
GO Component	GO:0098797	Plasma membrane protein complex	13	547	2023-05-01	2.11e-08	HCN4,CACNA1D,SCN1A,ABCC8,KCND3,CACNA1A,CNTNAP2,KCNQ3,DLG4,SCN9A,GRIA1,GRIN2B,GJA5
GO Component	GO:0071944	Cell periphery	31	5432	0.44	8.19e-08	HCN4,CNTNAP1,KCTD7,CACNA1D,TBC1D24,KCNT2,SCN1A,ABCC8,HOMER2,ITPR1,KCND3,OXTR,ANK2,CACNA1A,CNTNAP2,RYR2,KCNT1,SPTAN1,PCDH19,CDKL5,KCNQ3,DLG4,SCN9A,UNC80,RELN,GRIA1,NRXN3,PRRT2,SHANK2,GRIN2B,GJA5
GO Component	GO:0043005	Neuron projection	17	1366	0.77	1.74e-07	CNTNAP1,TBC1D24,SCN1A,HOMER2,KCND3,ANK2,CNTNAP2,CDKL5,KCNQ3,DLG4,SCN9A,UNC80,RELN,GRIA1,PRRT2,SHANK2,GRIN2B
GO Component	GO:0005886	Plasma membrane	30	5314	0.43	2.58e-07	HCN4,CNTNAP1,KCTD7,CACNA1D,TBC1D24,KCNT2,SCN1A,ABCC8,HOMER2,ITPR1,KCND3,OXTR,ANK2,CACNA1A,CNTNAP2,RYR2,KCNT1,PCDH19,CDKL5,KCNQ3,DLG4,SCN9A,UNC80,RELN,GRIA1,NRXN3,PRRT2,SHANK2,GRIN2B,GJA5
GO Component	GO:0098796	Membrane protein complex	15	1141	0.8	9.26e-07	HCN4,CACNA1D,SCN1A,ABCC8,KCND3,CACNA1A,CNTNAP2,RYR2,KCNQ3,DLG4,SCN9A,UNC80,GRIA1,GRIN2B,GJA5
GO Component	GO:0030424	Axon	12	646	0.95	9.31e-07	CNTNAP1,TBC1D24,SCN1A,CNTNAP2,CDKL5,KCNQ3,DLG4,SCN9A,UNC80,GRIA1,PRRT2,SHANK2
GO Component	GO:0042995	Cell projection	20	2287	0.62	9.31e-07	CNTNAP1,TBC1D24,SCN1A,HOMER2,KCND3,OXTR,ANK2,CACNA1A,CNTNAP2,CDKL5,KCNQ3,DLG4,SCN9A,UNC80,RELN,GRIA1,PRRT2,SHANK2,GRIN2B,GJA5
GO Component	GO:0045202	Synapse	16	1351	0.75	9.31e-07	CNTNAP1,CACNA1D,TBC1D24,HOMER2,ITPR1,KCND3,ANK2,CACNA1A,CDKL5,KCNQ3,DLG4,MECP2,GRIA1,PRRT2,SHANK2,GRIN2B
GO Component	GO:0030054	Cell junction	19	2075	0.64	1.01e-06	CNTNAP1,CACNA1D,TBC1D24,SCN1A,HOMER2,ITPR1,KCND3,ANK2,CACNA1A,CNTNAP2,CDKL5,KCNQ3,DLG4,MECP2,GRIA1,PRRT2,SHANK2,GRIN2B,GJA5
GO Component	GO:0005887	Integral component of plasma membrane	17	1623	0.7	1.16e-06	HCN4,CNTNAP1,CACNA1D,SCN1A,ABCC8,KCND3,OXTR,CNTNAP2,PCDH19,KCNQ3,DLG4,SCN9A,GRIA1,NRXN3,PRRT2,GRIN2B,GJA5
GO Component	GO:0098794	Postsynapse	11	643	0.91	7.05e-06	HOMER2,ITPR1,KCND3,ANK2,CDKL5,DLG4,MECP2,GRIA1,PRRT2,SHANK2,GRIN2B
GO Component	GO:0099572	Postsynaptic specialization	9	369	2023-07-01	7.05e-06	HOMER2,ITPR1,KCND3,CDKL5,DLG4,GRIA1,PRRT2,SHANK2,GRIN2B
GO Component	GO:0120025	Plasma membrane bounded cell projection	18	2193	0.59	1.19e-05	CNTNAP1,TBC1D24,SCN1A,HOMER2,KCND3,OXTR,ANK2,CNTNAP2,CDKL5,KCNQ3,DLG4,SCN9A,UNC80,RELN,GRIA1,PRRT2,SHANK2,GRIN2B
GO Component	GO:0044304	Main axon	5	70	1.53	4.30e-05	CNTNAP1,SCN1A,CNTNAP2,KCNQ3,DLG4
GO Component	GO:0014069	Postsynaptic density	8	344	2023-05-01	4.82e-05	HOMER2,ITPR1,CDKL5,DLG4,GRIA1,PRRT2,SHANK2,GRIN2B
GO Component	GO:0036477	Somatodendritic compartment	11	852	0.79	8.12e-05	SCN1A,HOMER2,KCND3,CACNA1A,CNTNAP2,CDKL5,DLG4,RELN,GRIA1,PRRT2,SHANK2
GO Component	GO:0097060	Synaptic membrane	8	387	0.99	9.56e-05	CNTNAP1,CACNA1D,KCND3,ANK2,DLG4,GRIA1,PRRT2,GRIN2B
GO Component	GO:0016020	Membrane	34	9072	0.25	0.00011	HCN4,CNTNAP1,KCTD7,CACNA1D,TBC1D24,KCNT2,SCN1A,ABCC8,COG8,HOMER2,ITPR1,KCND3,PNKP,OXTR,ANK2,CACNA1A,CNTNAP2,RYR2,KCNT1,SPTAN1,PCDH19,CDKL5,KCNQ3,DLG4,DEPDC5,SCN9A,UNC80,RELN,GRIA1,NRXN3,PRRT2,SHANK2,GRIN2B,GJA5
GO Component	GO:0034705	Potassium channel complex	5	91	1.42	0.00011	HCN4,ABCC8,KCND3,CNTNAP2,KCNQ3
GO Component	GO:0030425	Dendrite	9	612	0.85	0.00027	HOMER2,KCND3,CNTNAP2,CDKL5,DLG4,RELN,GRIA1,PRRT2,SHANK2
GO Component	GO:0098590	Plasma membrane region	12	1219	0.67	0.00030	CNTNAP1,CACNA1D,KCND3,OXTR,ANK2,CNTNAP2,CDKL5,DLG4,GRIA1,PRRT2,SHANK2,GRIN2B
GO Component	GO:0099634	Postsynaptic specialization membrane	5	126	1.28	0.00043	KCND3,DLG4,GRIA1,PRRT2,GRIN2B
GO Component	GO:0042383	Sarcolemma	5	132	1.26	0.00052	CACNA1D,SCN1A,KCND3,ANK2,RYR2
GO Component	GO:0045211	Postsynaptic membrane	6	281	2023-01-01	0.0014	KCND3,ANK2,DLG4,GRIA1,PRRT2,GRIN2B
GO Component	GO:0008076	Voltage-gated potassium channel complex	4	82	1.37	0.0016	HCN4,KCND3,CNTNAP2,KCNQ3
GO Component	GO:0016021	Integral component of membrane	23	5181	0.33	0.0029	HCN4,CNTNAP1,CACNA1D,KCNT2,SCN1A,ABCC8,ITPR1,KCND3,OXTR,CACNA1A,CNTNAP2,RYR2,KCNT1,PCDH19,KCNQ3,DLG4,SCN9A,UNC80,GRIA1,NRXN3,PRRT2,GRIN2B,GJA5
GO Component	GO:0098839	Postsynaptic density membrane	4	100	1.28	0.0032	DLG4,GRIA1,PRRT2,GRIN2B
GO Component	GO:0043025	Neuronal cell body	7	518	0.81	0.0046	SCN1A,HOMER2,KCND3,CACNA1A,CNTNAP2,GRIA1,SHANK2
GO Component	GO:0008328	Ionotropic glutamate receptor complex	3	43	1.52	0.0054	DLG4,GRIA1,GRIN2B
GO Component	GO:0030018	Z disc	4	131	1.16	0.0076	CACNA1D,SCN1A,ANK2,RYR2
GO Component	GO:0014704	Intercalated disc	3	51	1.45	0.0079	SCN1A,ANK2,GJA5
GO Component	GO:0033010	Paranodal junction	2	8	2023-08-02	0.0079	CNTNAP1,CNTNAP2
GO Component	GO:0030315	T-tubule	3	54	1.42	0.0089	CACNA1D,SCN1A,ANK2
GO Component	GO:0044224	Juxtaparanode region of axon	2	10	1.98	0.0103	CNTNAP2,DLG4
GO Component	GO:0099699	Integral component of synaptic membrane	4	157	2023-08-01	0.0127	CACNA1D,KCND3,GRIA1,PRRT2
GO Component	GO:0034704	Calcium channel complex	3	64	1.35	0.0131	CACNA1D,CACNA1A,RYR2
GO Component	GO:0043197	Dendritic spine	4	173	2023-04-01	0.0170	DLG4,GRIA1,PRRT2,SHANK2
GO Component	GO:0033268	Node of ranvier	2	15	2023-08-01	0.0182	SCN1A,KCNQ3
GO Component	GO:0001518	Voltage-gated sodium channel complex	2	17	1.75	0.0224	SCN1A,SCN9A
GO Component	GO:0043194	Axon initial segment	2	18	1.72	0.0240	SCN1A,KCNQ3
GO Component	GO:0098793	Presynapse	6	526	0.74	0.0240	CNTNAP1,CACNA1D,TBC1D24,DLG4,GRIA1,PRRT2
GO Component	GO:0098978	Glutamatergic synapse	5	361	0.82	0.0284	HOMER2,CDKL5,DLG4,GRIA1,PRRT2
GO Component	GO:0032991	Protein-containing complex	20	5073	0.27	0.0401	HCN4,CACNA1D,SCN1A,ABCC8,COG8,ITPR1,KCND3,CACNA1A,CNTNAP2,RYR2,SPTAN1,KCNQ3,DLG4,DEPDC5,FBXO11,SCN9A,UNC80,GRIA1,GRIN2B,GJA5
GO Component	GO:0032281	AMPA glutamate receptor complex	2	26	1.56	0.0434	DLG4,GRIA1
STRING clusters	CL:23063	Mixed, incl. infancy electroclinical syndrome, and early infantile epileptic encephalopathy 9	5	11	2.34	6.06e-07	TBC1D24,KCNT1,PCDH19,ARX,CDKL5
STRING clusters	CL:23085	Voltage-gated channel, and calcium-activated potassium channel activity	8	158	1.38	3.81e-06	HCN4,CACNA1D,SCN1A,KCND3,ANK2,CACNA1A,KCNQ3,SCN9A
STRING clusters	CL:22534	Mixed, incl. protein-protein interactions at synapses, and neurotransmitter transport	8	167	1.36	3.86e-06	CNTNAP1,HOMER2,CNTNAP2,DLG4,GRIA1,NRXN3,SHANK2,GRIN2B
STRING clusters	CL:22538	Ionotropic glutamate receptor complex, and disruption of postsynaptic signaling by cnv	6	64	1.65	7.70e-06	HOMER2,DLG4,GRIA1,NRXN3,SHANK2,GRIN2B
STRING clusters	CL:23087	Potassium channel activity, and phase 0 - rapid depolarisation	6	114	2023-04-01	0.00011	HCN4,SCN1A,KCND3,ANK2,KCNQ3,SCN9A
STRING clusters	CL:23065	West syndrome, and Protocadherin-19	3	5	2.46	0.00021	PCDH19,ARX,CDKL5
STRING clusters	CL:23196	Interaction between L1 and Ankyrins, and Phase 0 - rapid depolarisation	4	28	1.83	0.00023	SCN1A,ANK2,KCNQ3,SCN9A
STRING clusters	CL:23090	Voltage gated Potassium channels, and Phase 0 - rapid depolarisation	5	81	1.47	0.00036	SCN1A,KCND3,ANK2,KCNQ3,SCN9A
STRING clusters	CL:22542	Unblocking of NMDA receptors, glutamate binding and activation, and neurotransmitter receptor transport, postsynaptic endosome to lysosome	3	20	1.85	0.0044	DLG4,GRIA1,GRIN2B
STRING clusters	CL:22619	Neurexins and neuroligins	3	20	1.85	0.0044	HOMER2,NRXN3,SHANK2
STRING clusters	CL:23220	Ankyrin-G binding site, and Ankyrin-3, death domain	2	5	2.28	0.0213	SCN1A,KCNQ3
KEGG	hsa04724	Glutamatergic synapse	8	111	1.54	3.94e-08	CACNA1D,HOMER2,ITPR1,CACNA1A,DLG4,GRIA1,SHANK2,GRIN2B
KEGG	hsa04728	Dopaminergic synapse	6	128	1.35	5.65e-05	CACNA1D,SCN1A,ITPR1,CACNA1A,GRIA1,GRIN2B
KEGG	hsa05017	Spinocerebellar ataxia	6	135	1.33	5.65e-05	ITPR1,KCND3,CACNA1A,RELN,GRIA1,GRIN2B
KEGG	hsa04713	Circadian entrainment	5	92	1.41	0.00015	CACNA1D,ITPR1,RYR2,GRIA1,GRIN2B
KEGG	hsa04024	cAMP signaling pathway	6	208	1.14	0.00035	HCN4,CACNA1D,OXTR,RYR2,GRIA1,GRIN2B
KEGG	hsa04020	Calcium signaling pathway	5	193	2023-09-01	0.0031	CACNA1D,ITPR1,OXTR,CACNA1A,RYR2
KEGG	hsa04725	Cholinergic synapse	4	110	1.24	0.0041	CACNA1D,ITPR1,CACNA1A,KCNQ3
KEGG	hsa05033	Nicotine addiction	3	38	1.58	0.0041	CACNA1A,GRIA1,GRIN2B
KEGG	hsa04930	Type II diabetes mellitus	3	46	1.49	0.0055	CACNA1D,ABCC8,CACNA1A
KEGG	hsa04723	Retrograde endocannabinoid signaling	4	145	2023-12-01	0.0088	CACNA1D,ITPR1,CACNA1A,GRIA1
KEGG	hsa04730	Long-term depression	3	59	1.38	0.0088	ITPR1,CACNA1A,GRIA1
KEGG	hsa04921	Oxytocin signaling pathway	4	149	2023-11-01	0.0088	CACNA1D,ITPR1,OXTR,RYR2
KEGG	hsa04720	Long-term potentiation	3	64	1.35	0.0096	ITPR1,GRIA1,GRIN2B
KEGG	hsa05031	Amphetamine addiction	3	66	1.34	0.0097	CACNA1D,GRIA1,GRIN2B
KEGG	hsa04742	Taste transduction	3	81	1.25	0.0161	HCN4,CACNA1A,SCN9A
KEGG	hsa04911	Insulin secretion	3	82	1.24	0.0161	CACNA1D,ABCC8,RYR2
KEGG	hsa04726	Serotonergic synapse	3	108	2023-12-01	0.0318	CACNA1D,ITPR1,CACNA1A
KEGG	hsa05020	Prion disease	4	265	0.86	0.0439	CACNA1D,ITPR1,RYR2,GRIN2B
Reactome	HSA-112316	Neuronal System	11	406	2023-11-01	1.37e-06	HCN4,ABCC8,HOMER2,KCND3,CACNA1A,KCNQ3,DLG4,GRIA1,NRXN3,SHANK2,GRIN2B
Reactome	HSA-373760	L1CAM interactions	7	119	1.45	7.79e-06	CNTNAP1,SCN1A,ANK2,SPTAN1,KCNQ3,DLG4,SCN9A
Reactome	HSA-445095	Interaction between L1 and Ankyrins	5	31	1.89	8.08e-06	SCN1A,ANK2,SPTAN1,KCNQ3,SCN9A
Reactome	HSA-6794362	Protein-protein interactions at synapses	6	85	1.53	1.81e-05	HOMER2,DLG4,GRIA1,NRXN3,SHANK2,GRIN2B
Reactome	HSA-422475	Axon guidance	10	547	0.94	6.77e-05	CNTNAP1,CACNA1D,SCN1A,ANK2,SPTAN1,KCNQ3,DLG4,SCN9A,RELN,GRIN2B
Reactome	HSA-6794361	Neurexins and neuroligins	5	55	1.64	6.77e-05	HOMER2,DLG4,NRXN3,SHANK2,GRIN2B
Reactome	HSA-5576891	Cardiac conduction	5	126	1.28	0.0021	SCN1A,ITPR1,KCND3,RYR2,SCN9A
Reactome	HSA-438066	Unblocking of NMDA receptors, glutamate binding and activation	3	21	1.83	0.0040	DLG4,GRIA1,GRIN2B
Reactome	HSA-8849932	Synaptic adhesion-like molecules	3	21	1.83	0.0040	DLG4,GRIA1,GRIN2B
Reactome	HSA-9620244	Long-term potentiation	3	23	1.79	0.0042	DLG4,GRIA1,GRIN2B
Reactome	HSA-422356	Regulation of insulin secretion	4	78	1.39	0.0046	CACNA1D,ABCC8,ITPR1,CACNA1A
Reactome	HSA-1296071	Potassium Channels	4	103	1.27	0.0105	HCN4,ABCC8,KCND3,KCNQ3
Reactome	HSA-9022707	MECP2 regulates transcription factors	2	5	2.28	0.0118	RBFOX1,MECP2
Reactome	HSA-9032500	Activated NTRK2 signals through FYN	2	7	2.13	0.0184	DOCK3,GRIN2B
Reactome	HSA-199977	ER to Golgi Anterograde Transport	4	152	2023-01-01	0.0337	COG8,ANK2,SPTAN1,GRIA1
Reactome	HSA-8986944	Transcriptional Regulation by MECP2	3	59	1.38	0.0337	RBFOX1,MECP2,GRIN2B
WikiPathways	WP4312	Rett syndrome causing genes	4	47	1.61	0.0026	SCN1A,CDKL5,MECP2,GRIN2B
WikiPathways	WP4549	Fragile X syndrome	5	119	2023-03-01	0.0026	ITPR1,DLG4,MECP2,GRIA1,GRIN2B
WikiPathways	WP3584	MECP2 and associated Rett syndrome	4	72	1.42	0.0037	RBFOX1,TET3,MECP2,GRIA1
WikiPathways	WP4760	PKC-gamma calcium signaling pathway in ataxia	3	22	1.81	0.0037	ITPR1,CACNA1A,GRIA1
WikiPathways	WP536	Calcium regulation in cardiac cells	5	148	1.21	0.0037	CACNA1D,ITPR1,CACNA1A,RYR2,GJA5
WikiPathways	WP4698	Vitamin D-sensitive calcium signaling in depression	3	40	1.55	0.0112	ITPR1,KCNQ3,GRIN2B
WikiPathways	WP2380	Brain-derived neurotrophic factor (BDNF) signaling pathway	4	143	1.13	0.0225	DOCK3,CDKL5,GRIA1,GRIN2B
WikiPathways	WP3585	Cytosine methylation	2	9	2023-03-02	0.0225	TET3,MECP2
WikiPathways	WP3679	Cell-type dependent selectivity of CCK2R signaling	2	13	1.87	0.0332	ITPR1,RYR2
Monarch HPO	HP:0001250	Seizure	31	1606	0.96	1.39e-21	PNPO,CNTNAP1,DOCK3,KCTD7,CACNA1D,TBC1D24,KCNT2,SCN1A,ABCC8,COG8,PNKP,ANK2,CACNA1A,CNTNAP2,RYR2,KCNT1,SPTAN1,PCDH19,ARX,CDKL5,KCNQ3,DLG4,DEPDC5,FBXO11,SCN9A,TET3,UNC80,RELN,MECP2,PRRT2,GRIN2B
Monarch HPO	HP:0002353	EEG abnormality	22	440	1.38	1.39e-21	PNPO,KCTD7,TBC1D24,KCNT2,SCN1A,ABCC8,PNKP,CACNA1A,CNTNAP2,KCNT1,SPTAN1,PCDH19,ARX,CDKL5,KCNQ3,DEPDC5,TET3,UNC80,RELN,MECP2,PRRT2,GRIN2B
Monarch HPO	HP:0002069	Bilateral tonic-clonic seizure	17	263	1.49	9.67e-18	KCTD7,CACNA1D,TBC1D24,SCN1A,ABCC8,PNKP,CACNA1A,KCNT1,PCDH19,ARX,CDKL5,KCNQ3,DEPDC5,RELN,MECP2,PRRT2,GRIN2B
Monarch HPO	HP:0012638	Abnormal nervous system physiology	34	3153	0.71	2.18e-17	PNPO,CNTNAP1,DOCK3,KCTD7,CACNA1D,TBC1D24,KCNT2,SCN1A,ABCC8,COG8,ITPR1,RBFOX1,KCND3,PNKP,ANK2,CACNA1A,CNTNAP2,RYR2,KCNT1,SPTAN1,PCDH19,ARX,CDKL5,KCNQ3,DLG4,DEPDC5,FBXO11,SCN9A,TET3,UNC80,RELN,MECP2,PRRT2,GRIN2B
Monarch HPO	HP:0020219	Motor seizure	15	171	1.62	2.59e-17	KCTD7,CACNA1D,TBC1D24,SCN1A,PNKP,CACNA1A,KCNT1,PCDH19,ARX,CDKL5,KCNQ3,DEPDC5,MECP2,PRRT2,GRIN2B
Monarch HPO	HP:0007359	Focal-onset seizure	16	265	1.46	2.55e-16	KCTD7,CACNA1D,TBC1D24,SCN1A,PNKP,CACNA1A,CNTNAP2,KCNT1,PCDH19,ARX,CDKL5,KCNQ3,DEPDC5,RELN,PRRT2,GRIN2B
Monarch HPO	HP:0003808	Abnormal muscle tone	27	1773	0.86	1.01e-15	PNPO,CNTNAP1,DOCK3,CACNA1D,TBC1D24,KCNT2,SCN1A,ABCC8,COG8,ITPR1,KCND3,PNKP,CACNA1A,CNTNAP2,KCNT1,SPTAN1,PCDH19,ARX,CDKL5,KCNQ3,FBXO11,TET3,UNC80,RELN,MECP2,PRRT2,GRIN2B
Monarch HPO	HP:0002133	Status epilepticus	14	176	1.58	1.22e-15	PNPO,KCTD7,TBC1D24,SCN1A,ABCC8,COG8,CACNA1A,KCNT1,PCDH19,ARX,KCNQ3,MECP2,PRRT2,GRIN2B
Monarch HPO	HP:0011153	Focal motor seizure	12	90	2023-08-01	1.39e-15	KCTD7,CACNA1D,TBC1D24,SCN1A,CACNA1A,KCNT1,PCDH19,ARX,KCNQ3,DEPDC5,PRRT2,GRIN2B
Monarch HPO	HP:0001336	Myoclonus	16	313	1.39	1.75e-15	PNPO,KCTD7,TBC1D24,SCN1A,COG8,KCND3,PNKP,CACNA1A,SPTAN1,PCDH19,ARX,CDKL5,KCNQ3,MECP2,PRRT2,GRIN2B
Monarch HPO	HP:0100543	Cognitive impairment	27	1901	0.83	3.96e-15	DOCK3,KCTD7,CACNA1D,TBC1D24,SCN1A,ABCC8,COG8,ITPR1,KCND3,PNKP,CACNA1A,CNTNAP2,RYR2,KCNT1,SPTAN1,PCDH19,ARX,CDKL5,DLG4,DEPDC5,FBXO11,TET3,UNC80,RELN,MECP2,PRRT2,GRIN2B
Monarch HPO	HP:0000118	Phenotypic abnormality	37	5134	0.54	8.27e-15	PNPO,HCN4,CNTNAP1,DOCK3,KCTD7,CACNA1D,TBC1D24,KCNT2,SCN1A,ABCC8,COG8,ITPR1,RBFOX1,KCND3,PNKP,OXTR,ANK2,CACNA1A,CNTNAP2,RYR2,KCNT1,SPTAN1,PCDH19,ARX,CDKL5,KCNQ3,DLG4,DEPDC5,FBXO11,SCN9A,TET3,UNC80,RELN,MECP2,PRRT2,GRIN2B,GJA5
Monarch HPO	HP:0011182	Interictal epileptiform activity	12	113	2023-07-01	1.26e-14	KCTD7,TBC1D24,SCN1A,ABCC8,CACNA1A,KCNT1,PCDH19,KCNQ3,DEPDC5,RELN,MECP2,PRRT2
Monarch HPO	HP:0012443	Abnormality of brain morphology	28	2250	0.77	1.45e-14	PNPO,CNTNAP1,DOCK3,KCTD7,CACNA1D,TBC1D24,KCNT2,SCN1A,COG8,ITPR1,KCND3,PNKP,CACNA1A,CNTNAP2,KCNT1,SPTAN1,PCDH19,ARX,CDKL5,DLG4,DEPDC5,FBXO11,TET3,UNC80,RELN,MECP2,PRRT2,GRIN2B
Monarch HPO	HP:0100022	Abnormality of movement	26	1854	0.83	2.53e-14	PNPO,CNTNAP1,DOCK3,KCTD7,CACNA1D,TBC1D24,SCN1A,ABCC8,COG8,ITPR1,KCND3,PNKP,CACNA1A,CNTNAP2,KCNT1,SPTAN1,PCDH19,ARX,CDKL5,KCNQ3,DEPDC5,SCN9A,UNC80,MECP2,PRRT2,GRIN2B
Monarch HPO	HP:0001249	Intellectual disability	25	1655	0.86	2.61e-14	DOCK3,KCTD7,CACNA1D,TBC1D24,SCN1A,ABCC8,COG8,ITPR1,PNKP,CACNA1A,CNTNAP2,KCNT1,SPTAN1,PCDH19,ARX,CDKL5,DLG4,DEPDC5,FBXO11,TET3,UNC80,RELN,MECP2,PRRT2,GRIN2B
Monarch HPO	HP:0011198	EEG with generalized epileptiform discharges	14	241	1.44	3.54e-14	PNPO,TBC1D24,KCNT2,SCN1A,ABCC8,PNKP,CACNA1A,SPTAN1,PCDH19,ARX,CDKL5,DEPDC5,PRRT2,GRIN2B
Monarch HPO	HP:0011442	Abnormal central motor function	25	1687	0.85	3.54e-14	PNPO,CNTNAP1,DOCK3,KCTD7,CACNA1D,TBC1D24,SCN1A,ABCC8,COG8,ITPR1,KCND3,PNKP,CACNA1A,CNTNAP2,KCNT1,SPTAN1,PCDH19,ARX,CDKL5,KCNQ3,DEPDC5,UNC80,MECP2,PRRT2,GRIN2B
Monarch HPO	HP:0001252	Hypotonia	24	1506	0.88	4.08e-14	PNPO,CNTNAP1,DOCK3,TBC1D24,KCNT2,SCN1A,ABCC8,COG8,ITPR1,PNKP,CACNA1A,CNTNAP2,KCNT1,SPTAN1,PCDH19,ARX,CDKL5,KCNQ3,FBXO11,TET3,UNC80,RELN,MECP2,GRIN2B
Monarch HPO	HP:0003011	Abnormality of the musculature	28	2380	0.75	4.12e-14	PNPO,CNTNAP1,DOCK3,CACNA1D,TBC1D24,KCNT2,SCN1A,ABCC8,COG8,ITPR1,KCND3,PNKP,CACNA1A,CNTNAP2,KCNT1,SPTAN1,PCDH19,ARX,CDKL5,KCNQ3,FBXO11,SCN9A,TET3,UNC80,RELN,MECP2,PRRT2,GRIN2B
Monarch HPO	HP:0002373	Febrile seizure (within the age range of 3 months to 6 years)	11	92	1.76	5.56e-14	KCTD7,TBC1D24,SCN1A,PNKP,CACNA1A,PCDH19,ARX,CDKL5,KCNQ3,DEPDC5,PRRT2
Monarch HPO	HP:0002197	Generalized-onset seizure	13	192	1.51	6.32e-14	TBC1D24,SCN1A,PNKP,CACNA1A,CNTNAP2,PCDH19,ARX,CDKL5,KCNQ3,DEPDC5,RELN,PRRT2,GRIN2B
Monarch HPO	HP:0001272	Cerebellar atrophy	15	345	1.32	1.03e-13	CNTNAP1,KCTD7,TBC1D24,SCN1A,COG8,ITPR1,KCND3,PNKP,CACNA1A,SPTAN1,ARX,CDKL5,DLG4,RELN,PRRT2
Monarch HPO	HP:0011185	EEG with focal epileptiform discharges	11	101	1.72	1.24e-13	KCTD7,TBC1D24,SCN1A,CACNA1A,KCNT1,PCDH19,KCNQ3,DEPDC5,RELN,MECP2,PRRT2
Monarch HPO	HP:0012759	Neurodevelopmental abnormality	27	2322	0.74	2.45e-13	PNPO,DOCK3,KCTD7,CACNA1D,TBC1D24,KCNT2,SCN1A,ABCC8,COG8,ITPR1,PNKP,CACNA1A,CNTNAP2,KCNT1,SPTAN1,PCDH19,ARX,CDKL5,DLG4,DEPDC5,FBXO11,TET3,UNC80,RELN,MECP2,PRRT2,GRIN2B
Monarch HPO	HP:0002376	Developmental regression	14	306	1.34	5.43e-13	KCTD7,TBC1D24,KCNT2,SCN1A,COG8,PNKP,CACNA1A,KCNT1,SPTAN1,PCDH19,ARX,CDKL5,MECP2,GRIN2B
Monarch HPO	HP:0007367	Atrophy/Degeneration affecting the central nervous system	18	744	2023-06-01	9.08e-13	PNPO,CNTNAP1,DOCK3,KCTD7,TBC1D24,SCN1A,COG8,PNKP,CACNA1A,KCNT1,SPTAN1,PCDH19,ARX,CDKL5,UNC80,MECP2,PRRT2,GRIN2B
Monarch HPO	HP:0032792	Tonic seizure	10	85	1.75	1.30e-12	SCN1A,PNKP,CACNA1A,PCDH19,ARX,CDKL5,KCNQ3,MECP2,PRRT2,GRIN2B
Monarch HPO	HP:0001276	Hypertonia	19	948	0.98	3.15e-12	PNPO,CNTNAP1,CACNA1D,SCN1A,ABCC8,KCND3,PNKP,CACNA1A,CNTNAP2,KCNT1,SPTAN1,PCDH19,ARX,CDKL5,KCNQ3,UNC80,MECP2,PRRT2,GRIN2B
Monarch HPO	HP:0012444	Brain atrophy	17	675	2023-08-01	3.28e-12	PNPO,CNTNAP1,DOCK3,KCTD7,TBC1D24,SCN1A,PNKP,CACNA1A,KCNT1,SPTAN1,PCDH19,ARX,CDKL5,UNC80,MECP2,PRRT2,GRIN2B
Monarch HPO	HP:0000234	Abnormality of the head	28	2868	0.67	3.31e-12	PNPO,CNTNAP1,DOCK3,KCTD7,CACNA1D,TBC1D24,SCN1A,ABCC8,COG8,ITPR1,PNKP,CACNA1A,CNTNAP2,KCNT1,SPTAN1,PCDH19,ARX,CDKL5,KCNQ3,DEPDC5,FBXO11,SCN9A,TET3,UNC80,RELN,MECP2,PRRT2,GRIN2B
Monarch HPO	HP:0000708	Behavioral abnormality	24	1891	0.78	3.76e-12	CNTNAP1,DOCK3,CACNA1D,TBC1D24,SCN1A,ABCC8,ITPR1,RBFOX1,PNKP,CACNA1A,CNTNAP2,KCNT1,PCDH19,ARX,CDKL5,DLG4,DEPDC5,FBXO11,TET3,UNC80,RELN,MECP2,PRRT2,GRIN2B
Monarch HPO	HP:0001298	Encephalopathy	13	276	1.35	3.76e-12	PNPO,TBC1D24,KCNT2,SCN1A,COG8,CACNA1A,KCNT1,SPTAN1,ARX,CDKL5,UNC80,MECP2,GRIN2B
Monarch HPO	HP:0002123	Generalized myoclonic seizure	11	146	1.56	3.88e-12	KCTD7,TBC1D24,KCNT2,SCN1A,ABCC8,CACNA1A,PCDH19,ARX,CDKL5,MECP2,GRIN2B
Monarch HPO	HP:0200134	Epileptic encephalopathy	10	100	1.68	4.77e-12	PNPO,TBC1D24,KCNT2,SCN1A,CACNA1A,KCNT1,SPTAN1,ARX,CDKL5,GRIN2B
[truncated: 585 more rows]

## Sheet: Enrichment subnetwork4
#category	term ID	term description	observed gene count	background gene count	strength	false discovery rate	matching proteins in your network (labels)
[truncated: 141 more rows]

[truncated: 8 more sheets: Enrichment subnetwork5, Enrichment subnetwork6, Enrichment subnetwork7, Enrichment subnetwork8, Enrichment subnetwork9, Enrichment subnetwork10, Enrichment subnetwork11, Enrichment subnetwork12]
