# Supplementary material for: Developing a cluster-based approach for deciphering complexity in individuals with neurodevelopmental differences
Source: Front Pediatr. 2023 Sep 18;11:1171920. doi: 10.3389/fped.2023.1171920 (PMC10543689; doi:10.3389/fped.2023.1171920)
Supplement: Supplementary file 5 [file Table5.xlsx]

## Sheet: MCL clusters for cluster 14
#clustering method	cluster number	cluster color	gene count	protein name	protein description
MCL	1	Red	61	AR	Androgen receptor; Steroid hormone receptors are ligand-activated transcription factors that regulate eukaryotic gene expression and affect cellular proliferation and differentiation in target tissues. Transcription factor activity is modulated by bound coactivator and corepressor proteins. Transcription activation is down-regulated by NR0B2. Activated, but not phosphorylated, by HIPK3 and ZIPK/D…
MCL	1	Red	61	ARID1B	AT-rich interactive domain-containing protein 1B; Involved in transcriptional activation and repression of select genes by chromatin remodeling (alteration of DNA-nucleosome topology). Component of SWI/SNF chromatin remodeling complexes that carry out key enzymatic activities, changing chromatin structure by altering DNA-histone contacts within a nucleosome in an ATP-dependent manner. Belongs to …
MCL	1	Red	61	ASPM	Abnormal spindle-like microcephaly-associated protein; Involved in mitotic spindle regulation and coordination of mitotic processes. The function in regulating microtubule dynamics at spindle poles including spindle orientation, astral microtubule density and poleward microtubule flux seems to depend on the association with the katanin complex formed by KATNA1 and KATNB1. Enhances the microtubule…
MCL	1	Red	61	ATM	Serine-protein kinase ATM; Serine/threonine protein kinase which activates checkpoint signaling upon double strand breaks (DSBs), apoptosis and genotoxic stresses such as ionizing ultraviolet A light (UVA), thereby acting as a DNA damage sensor. Recognizes the substrate consensus sequence [ST]-Q. Phosphorylates 'Ser-139' of histone variant H2AX/H2AFX at double strand breaks (DSBs), thereby regula…
MCL	1	Red	61	ATR	Serine/threonine-protein kinase ATR; Serine/threonine protein kinase which activates checkpoint signaling upon genotoxic stresses such as ionizing radiation (IR), ultraviolet light (UV), or DNA replication stalling, thereby acting as a DNA damage sensor. Recognizes the substrate consensus sequence [ST]-Q. Phosphorylates BRCA1, CHEK1, MCM2, RAD17, RPA2, SMC1 and p53/TP53, which collectively inhibi…
MCL	1	Red	61	ATRX	Transcriptional regulator ATRX; Involved in transcriptional regulation and chromatin remodeling. Facilitates DNA replication in multiple cellular environments and is required for efficient replication of a subset of genomic loci. Binds to DNA tandem repeat sequences in both telomeres and euchromatin and in vitro binds DNA quadruplex structures. May help stabilizing G-rich regions into regular chr…
MCL	1	Red	61	B3GALTL	Udp-glucose:o-linked fucose beta-1,3-glucosyltransferase; Beta-1,3-glucosyltransferase; O-glucosyltransferase that transfers glucose toward fucose with a beta-1,3 linkage. Specifically glucosylates O-linked fucosylglycan on TSP type-1 domains of proteins, thereby contributing to elongation of O-fucosylglycan
MCL	1	Red	61	BLM	Bloom syndrome protein; ATP-dependent DNA helicase that unwinds single- and double-stranded DNA in a 3'-5' direction. Participates in DNA replication and repair. Involved in 5'-end resection of DNA during double-strand break (DSB) repair: unwinds DNA and recruits DNA2 which mediates the cleavage of 5'-ssDNA. Negatively regulates sister chromatid exchange (SCE). Stimulates DNA 4-way junction branc…
MCL	1	Red	61	BMP4	Bone morphogenetic protein 4; Induces cartilage and bone formation. Also act in mesoderm induction, tooth development, limb formation and fracture repair. Acts in concert with PTHLH/PTHRP to stimulate ductal outgrowth during embryonic mammary development and to inhibit hair follicle induction (By similarity); Bone morphogenetic proteins
MCL	1	Red	61	BRCA1	Breast cancer type 1 susceptibility protein; E3 ubiquitin-protein ligase that specifically mediates the formation of 'Lys-6'-linked polyubiquitin chains and plays a central role in DNA repair by facilitating cellular responses to DNA damage. It is unclear whether it also mediates the formation of other types of polyubiquitin chains. The E3 ubiquitin-protein ligase activity is required for its tum…
MCL	1	Red	61	BRCA2	Breast cancer type 2 susceptibility protein; Involved in double-strand break repair and/or homologous recombination. Binds RAD51 and potentiates recombinational DNA repair by promoting assembly of RAD51 onto single-stranded DNA (ssDNA). Acts by targeting RAD51 to ssDNA over double-stranded DNA, enabling RAD51 to displace replication protein-A (RPA) from ssDNA and stabilizing RAD51-ssDNA filaments…
MCL	1	Red	61	BRIP1	BRCA1 interacting protein C-terminal helicase 1; Fanconi anemia group J protein; DNA-dependent ATPase and 5' to 3' DNA helicase required for the maintenance of chromosomal stability. Acts late in the Fanconi anemia pathway, after FANCD2 ubiquitination. Involved in the repair of DNA double-strand breaks by homologous recombination in a manner that depends on its association with BRCA1
MCL	1	Red	61	BRPF1	Peregrin; Component of the MOZ/MORF complex which has a histone H3 acetyltransferase activity. Preferentially mediates histone H3-K23 acetylation. Positively regulates the transcription of RUNX1 and RUNX2; Bromodomain containing
MCL	1	Red	61	BUB1B	Mitotic checkpoint serine/threonine-protein kinase BUB1 beta; Essential component of the mitotic checkpoint. Required for normal mitosis progression. The mitotic checkpoint delays anaphase until all chromosomes are properly attached to the mitotic spindle. One of its checkpoint functions is to inhibit the activity of the anaphase-promoting complex/cyclosome (APC/C) by blocking the binding of CDC2…
MCL	1	Red	61	CDC45	Cell division control protein 45 homolog; Required for initiation of chromosomal DNA replication
MCL	1	Red	61	CHD2	Chromodomain-helicase-DNA-binding protein 2; DNA-binding helicase that specifically binds to the promoter of target genes, leading to chromatin remodeling, possibly by promoting deposition of histone H3.3. Involved in myogenesis via interaction with MYOD1: binds to myogenic gene regulatory sequences and mediates incorporation of histone H3.3 prior to the onset of myogenic gene expression, promoti…
MCL	1	Red	61	DNA2	DNA replication ATP-dependent helicase/nuclease DNA2; Key enzyme involved in DNA replication and DNA repair in nucleus and mitochondrion. Involved in Okazaki fragments processing by cleaving long flaps that escape FEN1: flaps that are longer than 27 nucleotides are coated by replication protein A complex (RPA), leading to recruit DNA2 which cleaves the flap until it is too short to bind RPA and b…
MCL	1	Red	61	EDN3	Endothelin-3; Endothelins are endothelium-derived vasoconstrictor peptides; Endogenous ligands
MCL	1	Red	61	EEF1A2	Elongation factor 1-alpha 2; This protein promotes the GTP-dependent binding of aminoacyl-tRNA to the A-site of ribosomes during protein biosynthesis; Belongs to the TRAFAC class translation factor GTPase superfamily. Classic translation factor GTPase family. EF-Tu/EF-1A subfamily
MCL	1	Red	61	EHMT1	[histone h3]-lysine9 n-trimethyltransferase ehmt; Histone-lysine N-methyltransferase EHMT1; Histone methyltransferase that specifically mono- and dimethylates 'Lys-9' of histone H3 (H3K9me1 and H3K9me2, respectively) in euchromatin. H3K9me represents a specific tag for epigenetic transcriptional repression by recruiting HP1 proteins to methylated histones. Also weakly methylates 'Lys-27' of histo…
MCL	1	Red	61	ELP4	Elongator complex protein 4; Acts as subunit of the RNA polymerase II elongator complex, which is a histone acetyltransferase component of the RNA polymerase II (Pol II) holoenzyme and is involved in transcriptional elongation. Elongator may play a role in chromatin remodeling and is involved in acetylation of histones H3 and probably H4
MCL	1	Red	61	EP300	Histone acetyltransferase p300; Functions as histone acetyltransferase and regulates transcription via chromatin remodeling. Acetylates all four core histones in nucleosomes. Histone acetylation gives an epigenetic tag for transcriptional activation. Mediates cAMP-gene regulation by binding specifically to phosphorylated CREB protein. Mediates acetylation of histone H3 at 'Lys-122' (H3K122ac), a …
MCL	1	Red	61	ERCC2	TFIIH basal transcription factor complex helicase XPD subunit; ATP-dependent 5'-3' DNA helicase, component of the core- TFIIH basal transcription factor. Involved in nucleotide excision repair (NER) of DNA by opening DNA around the damage, and in RNA transcription by RNA polymerase II by anchoring the CDK-activating kinase (CAK) complex, composed of CDK7, cyclin H and MAT1, to the core-TFIIH comp…
MCL	1	Red	61	FANCA	Fanconi anemia group A protein; DNA repair protein that may operate in a postreplication repair or a cell cycle checkpoint function. May be involved in interstrand DNA cross-link repair and in the maintenance of normal chromosome stability; Fanconi anemia complementation groups
MCL	1	Red	61	FANCE	Fanconi anemia group E protein; As part of the Fanconi anemia (FA) complex functions in DNA cross-links repair. Required for the nuclear accumulation of FANCC and provides a critical bridge between the FA complex and FANCD2
MCL	1	Red	61	FANCF	Fanconi anemia group F protein; DNA repair protein that may operate in a postreplication repair or a cell cycle checkpoint function. May be implicated in interstrand DNA cross-link repair and in the maintenance of normal chromosome stability (By similarity); Fanconi anemia complementation groups
MCL	1	Red	61	FANCG	Fanconi anemia group G protein; DNA repair protein that may operate in a postreplication repair or a cell cycle checkpoint function. May be implicated in interstrand DNA cross-link repair and in the maintenance of normal chromosome stability. Candidate tumor suppressor gene; Fanconi anemia complementation groups
MCL	1	Red	61	FANCI	Fanconi anemia group I protein; Plays an essential role in the repair of DNA double- strand breaks by homologous recombination and in the repair of interstrand DNA cross-links (ICLs) by promoting FANCD2 monoubiquitination by FANCL and participating in recruitment to DNA repair sites. Required for maintenance of chromosomal stability. Specifically binds branched DNA: binds both single- stranded DN…
MCL	1	Red	61	FOXG1	Forkhead box protein G1; Transcription repression factor which plays an important role in the establishment of the regional subdivision of the developing brain and in the development of the telencephalon; Forkhead boxes
MCL	1	Red	61	GATA4	Transcription factor GATA-4; Transcriptional activator that binds to the consensus sequence 5'-AGATAG-3' and plays a key role in cardiac development and function. In cooperation with TBX5, it binds to cardiac super-enhancers and promotes cardiomyocyte gene expression, while it downregulates endocardial and endothelial gene expression. Involved in bone morphogenetic protein (BMP)-mediated inductio…
MCL	1	Red	61	GDNF	Glial cell line-derived neurotrophic factor; Neurotrophic factor that enhances survival and morphological differentiation of dopaminergic neurons and increases their high-affinity dopamine uptake; Belongs to the TGF-beta family. GDNF subfamily
MCL	1	Red	61	H3F3B	H3 histone, family 3B (H3.3B); Variant histone H3 which replaces conventional H3 in a wide range of nucleosomes in active genes. Constitutes the predominant form of histone H3 in non-dividing cells and is incorporated into chromatin independently of DNA synthesis. Deposited at sites of nucleosomal displacement throughout transcribed genes, suggesting that it represents an epigenetic imprint of tr…
MCL	1	Red	61	HERC2	E3 ubiquitin-protein ligase HERC2; E3 ubiquitin-protein ligase that regulates ubiquitin- dependent retention of repair proteins on damaged chromosomes. Recruited to sites of DNA damage in response to ionizing radiation (IR) and facilitates the assembly of UBE2N and RNF8 promoting DNA damage-induced formation of 'Lys-63'-linked ubiquitin chains. Acts as a mediator of binding specificity between UB…
MCL	1	Red	61	KDM2B	F-box and leucine-rich repeat protein 10/11; Lysine-specific demethylase 2B; Histone demethylase that demethylates 'Lys-4' and 'Lys- 36' of histone H3, thereby playing a central role in histone code. Preferentially demethylates trimethylated H3 'Lys-4' and dimethylated H3 'Lys-36' residue while it has weak or no activity for mono- and tri-methylated H3 'Lys-36'. Preferentially binds the transcrib…
MCL	1	Red	61	KIF5C	Kinesin heavy chain isoform 5C; Mediates dendritic trafficking of mRNAs (By similarity). Kinesin is a microtubule-associated force-producing protein that may play a role in organelle transport; Belongs to the TRAFAC class myosin-kinesin ATPase superfamily. Kinesin family. Kinesin subfamily
MCL	1	Red	61	MITF	Microphthalmia-associated transcription factor; Transcription factor that regulates the expression of genes with essential roles in cell differentiation, proliferation and survival. Binds to M-boxes (5'-TCATGTG-3') and symmetrical DNA sequences (E-boxes) (5'-CACGTG-3') found in the promoters of target genes, such as BCL2 and tyrosinase (TYR). Plays an important role in melanocyte development by r…
MCL	1	Red	61	MRE11A	Double-strand break repair protein MRE11; Component of the MRN complex, which plays a central role in double-strand break (DSB) repair, DNA recombination, maintenance of telomere integrity and meiosis. The complex possesses single-strand endonuclease activity and double-strand- specific 3'-5' exonuclease activity, which are provided by MRE11. RAD50 may be required to bind DNA ends and hold them i…
MCL	1	Red	61	NBN	Nibrin; Component of the MRE11-RAD50-NBN (MRN complex) which plays a critical role in the cellular response to DNA damage and the maintenance of chromosome integrity. The complex is involved in double-strand break (DSB) repair, DNA recombination, maintenance of telomere integrity, cell cycle checkpoint control and meiosis. The complex possesses single-strand endonuclease activity and double-stran…
MCL	1	Red	61	OCA2	OCA2 melanosomal transmembrane protein; P protein; Could be involved in the transport of tyrosine, the precursor to melanin synthesis, within the melanocyte. Regulates the pH of melanosome and the melanosome maturation. One of the components of the mammalian pigmentary system. Seems to regulate the post-translational processing of tyrosinase, which catalyzes the limiting reaction in melanin synth…
MCL	1	Red	61	OXTR	Oxytocin receptor; Receptor for oxytocin. The activity of this receptor is mediated by G proteins which activate a phosphatidylinositol- calcium second messenger system; Arginine vasopressin and oxytocin receptors
MCL	1	Red	61	PAX6	Paired box protein Pax-6; Transcription factor with important functions in the development of the eye, nose, central nervous system and pancreas. Required for the differentiation of pancreatic islet alpha cells (By similarity). Competes with PAX4 in binding to a common element in the glucagon, insulin and somatostatin promoters. Regulates specification of the ventral neuron subtypes by establishi…
MCL	1	Red	61	PDX1	Pancreas/duodenum homeobox protein 1; Activates insulin, somatostatin, glucokinase, islet amyloid polypeptide and glucose transporter type 2 gene transcription. Particularly involved in glucose-dependent regulation of insulin gene transcription. As part of a PDX1:PBX1b:MEIS2b complex in pancreatic acinar cells is involved in the transcriptional activation of the ELA1 enhancer; the complex binds t…
MCL	1	Red	61	PHOX2B	Paired mesoderm homeobox protein 2B; Involved in the development of several major noradrenergic neuron populations, including the locus coeruleus. Transcription factor which could determine a neurotransmitter phenotype in vertebrates. Enhances second-messenger-mediated activation of the dopamine beta-hydrolase and c-fos promoters, and of several enhancers including cAMP-response element and serum…
MCL	1	Red	61	POLG	DNA polymerase subunit gamma-1; Involved in the replication of mitochondrial DNA. Associates with mitochondrial DNA; Belongs to the DNA polymerase type-A family
MCL	1	Red	61	PRDX1	Peroxiredoxin-1; Thiol-specific peroxidase that catalyzes the reduction of hydrogen peroxide and organic hydroperoxides to water and alcohols, respectively. Plays a role in cell protection against oxidative stress by detoxifying peroxides and as sensor of hydrogen peroxide-mediated signaling events. Might participate in the signaling cascades of growth factors and tumor necrosis factor-alpha by r…
MCL	1	Red	61	PRF1	Perforin-1; Plays a key role in secretory granule-dependent cell death, and in defense against virus-infected or neoplastic cells. Plays an important role in killing other cells that are recognized as non-self by the immune system, e.g. in transplant rejection or some forms of autoimmune disease. Can insert into the membrane of target cells in its calcium-bound form, oligomerize and form large po…
MCL	1	Red	61	PTEN	Phosphatase and tensin homolog; Tumor suppressor. Acts as a dual-specificity protein phosphatase, dephosphorylating tyrosine-, serine- and threonine- phosphorylated proteins. Also acts as a lipid phosphatase, removing the phosphate in the D3 position of the inositol ring from phosphatidylinositol 3,4,5-trisphosphate, phosphatidylinositol 3,4-diphosphate, phosphatidylinositol 3- phosphate and inos…
MCL	1	Red	61	RECQL4	ATP-dependent DNA helicase Q4; DNA-dependent ATPase. May modulate chromosome segregation; Belongs to the helicase family. RecQ subfamily
MCL	1	Red	61	RERE	Arginine-glutamic acid dipeptide repeats protein; Plays a role as a transcriptional repressor during development. May play a role in the control of cell survival. Overexpression of RERE recruits BAX to the nucleus particularly to POD and triggers caspase-3 activation, leading to cell death; GATA zinc finger domain containing
MCL	1	Red	61	SATB1	DNA-binding protein SATB1; Crucial silencing factor contributing to the initiation of X inactivation mediated by Xist RNA that occurs during embryogenesis and in lymphoma (By similarity). Binds to DNA at special AT-rich sequences, the consensus SATB1-binding sequence (CSBS), at nuclear matrix- or scaffold-associated regions. Thought to recognize the sugar-phosphate structure of double-stranded DN…
MCL	1	Red	61	TBCE	Tubulin-specific chaperone E; Tubulin-folding protein; involved in the second step of the tubulin folding pathway and in the regulation of tubulin heterodimer dissociation. Required for correct organization of microtubule cytoskeleton and mitotic splindle, and maintenance of the neuronal microtubule network
MCL	1	Red	61	TERT	Telomerase reverse transcriptase; Telomerase is a ribonucleoprotein enzyme essential for the replication of chromosome termini in most eukaryotes. Active in progenitor and cancer cells. Inactive, or very low activity, in normal somatic cells. Catalytic component of the teleromerase holoenzyme complex whose main activity is the elongation of telomeres by acting as a reverse transcriptase that adds…
MCL	1	Red	61	TINF2	TERF1-interacting nuclear factor 2; Component of the shelterin complex (telosome) that is involved in the regulation of telomere length and protection. Shelterin associates with arrays of double-stranded TTAGGG repeats added by telomerase and protects chromosome ends; without its protective activity, telomeres are no longer hidden from the DNA damage surveillance and chromosome ends are inappropr…
MCL	1	Red	61	TSC2	Tuberin; In complex with TSC1, this tumor suppressor inhibits the nutrient-mediated or growth factor-stimulated phosphorylation of S6K1 and EIF4EBP1 by negatively regulating mTORC1 signaling. Acts as a GTPase-activating protein (GAP) for the small GTPase RHEB, a direct activator of the protein kinase activity of mTORC1. May also play a role in microtubule-mediated protein transport. Also stimulat…
MCL	1	Red	61	TUBB2A	Tubulin beta-2A chain; Tubulin is the major constituent of microtubules. It binds two moles of GTP, one at an exchangeable site on the beta chain and one at a non-exchangeable site on the alpha chain (By similarity); Tubulins
MCL	1	Red	61	TUBB3	Tubulin beta-3 chain; Tubulin is the major constituent of microtubules. It binds two moles of GTP, one at an exchangeable site on the beta chain and one at a non-exchangeable site on the alpha chain. TUBB3 plays a critical role in proper axon guidance and mantainance; Belongs to the tubulin family
MCL	1	Red	61	UBE3A	Ubiquitin-protein ligase E3A; E3 ubiquitin-protein ligase which accepts ubiquitin from an E2 ubiquitin-conjugating enzyme in the form of a thioester and transfers it to its substrates. Several substrates have been identified including the RAD23A and RAD23B, MCM7 (which is involved in DNA replication), annexin A1, the PML tumor suppressor, and the cell cycle regulator CDKN1B. Catalyzes the high-ri…
MCL	1	Red	61	VCP	Transitional endoplasmic reticulum ATPase; Necessary for the fragmentation of Golgi stacks during mitosis and for their reassembly after mitosis. Involved in the formation of the transitional endoplasmic reticulum (tER). The transfer of membranes from the endoplasmic reticulum to the Golgi apparatus occurs via 50-70 nm transition vesicles which derive from part-rough, part-smooth transitional ele…
MCL	1	Red	61	WRAP53	Telomerase Cajal body protein 1; Essential component of the telomerase holoenzyme complex, a ribonucleoprotein complex essential for the replication of chromosome termini that elongates telomeres in most eukaryotes. In the telomerase holoenzyme complex, it controls telomerase localization to Cajal body. Required for delivery of TERC to telomeres during S phase and for telomerase activity. Binds s…
MCL	1	Red	61	WWOX	WW domain-containing oxidoreductase; Putative oxidoreductase. Acts as a tumor suppressor and plays a role in apoptosis. Required for normal bone development (By similarity). May function synergistically with p53/TP53 to control genotoxic stress-induced cell death. Plays a role in TGFB1 signaling and TGFB1-mediated cell death. May also play a role in tumor necrosis factor (TNF)-mediated cell death…
MCL	1	Red	61	ZIC2	Zinc finger protein ZIC 2; Acts as a transcriptional activator or repressor. Plays important roles in the early stage of organogenesis of the CNS. Activates the transcription of the serotonin transporter SERT in uncrossed ipsilateral retinal ganglion cells (iRGCs) to refine eye-specific projections in primary visual targets. Its transcriptional activity is repressed by MDFIC. Involved in the form…
MCL	2	Salmon	37	ABCA4	Atp-binding cassette, subfamily a (abc1), member 4; Retinal-specific ATP-binding cassette transporter; In the visual cycle, acts as an inward-directed retinoid flipase, retinoid substrates imported by ABCA4 from the extracellular or intradiscal (rod) membrane surfaces to the cytoplasmic membrane surface are all-trans-retinaldehyde (ATR) and N-retinyl-phosphatidyl-ethanolamine (NR-PE). Once transp…
MCL	2	Salmon	37	AHI1	Abelson helper integration site 1; Jouberin; Involved in vesicle trafficking and required for ciliogenesis, formation of primary non-motile cilium, and recruitment of RAB8A to the basal body of primary cilium. Component of the tectonic-like complex, a complex localized at the transition zone of primary cilia and acting as a barrier that prevents diffusion of transmembrane proteins between the cil…
MCL	2	Salmon	37	BBS1	Bardet-Biedl syndrome 1 protein; The BBSome complex is thought to function as a coat complex required for sorting of specific membrane proteins to the primary cilia. The BBSome complex is required for ciliogenesis but is dispensable for centriolar satellite function. This ciliogenic function is mediated in part by the Rab8 GDP/GTP exchange factor, which localizes to the basal body and contacts th…
MCL	2	Salmon	37	BBS7	Bardet-Biedl syndrome 7 protein; The BBSome complex is thought to function as a coat complex required for sorting of specific membrane proteins to the primary cilia. The BBSome complex is required for ciliogenesis but is dispensable for centriolar satellite function. This ciliogenic function is mediated in part by the Rab8 GDP/GTP exchange factor, which localizes to the basal body and contacts th…
MCL	2	Salmon	37	BEST1	Bestrophin-1; Forms calcium-sensitive chloride channels. Highly permeable to bicarbonate; Bestrophins
MCL	2	Salmon	37	C5orf42	Protein JBTS17; Involved in ciliogenesis. Involved in the establishment of cell polarity required for directional cell migration. Proposed to act in association with the CPLANE (ciliogenesis and planar polarity effectors) complex. Involved in recruitment of peripheral IFT-A proteins to basal bodies (By similarity)
MCL	2	Salmon	37	CC2D2A	Coiled-coil and C2 domain-containing protein 2A; Component of the tectonic-like complex, a complex localized at the transition zone of primary cilia and acting as a barrier that prevents diffusion of transmembrane proteins between the cilia and plasma membranes. Required for ciliogenesis and sonic hedgehog/SHH signaling (By similarity)
MCL	2	Salmon	37	CDH23	Cadherin related 23; Cadherin-23; Cadherins are calcium-dependent cell adhesion proteins. They preferentially interact with themselves in a homophilic manner in connecting cells. CDH23 is required for establishing and/or maintaining the proper organization of the stereocilia bundle of hair cells in the cochlea and the vestibule during late embryonic/early postnatal development. It is part of the …
MCL	2	Salmon	37	CEP290	Centrosomal protein of 290 kDa; Involved in early and late steps in cilia formation. Its association with CCP110 is required for inhibition of primary cilia formation by CCP110. May play a role in early ciliogenesis in the disappearance of centriolar satellites and in the transition of primary ciliar vesicles (PCVs) to capped ciliary vesicles (CCVs). Required for the centrosomal recruitment of RA…
MCL	2	Salmon	37	CEP63	Centrosomal protein of 63 kDa; Required for normal spindle assembly. Plays a key role in mother-centriole-dependent centriole duplication; the function seems also to involve CEP152, CDK5RAP2 and WDR62 through a stepwise assembled complex at the centrosome that recruits CDK2 required for centriole duplication. Reported to be required for centrosomal recruitment of CEP152; however, this function ha…
MCL	2	Salmon	37	CEP83	Coiled-coil domain-containing protein 41; Centrosomal protein of 83 kDa; Component of the distal appendage region of the centriole involved in the initiation of primary cilium assembly. May collaborate with IFT20 in the trafficking of ciliary membrane proteins from the Golgi complex to the cilium during the initiation of primary cilium assembly
MCL	2	Salmon	37	CERKL	Ceramide kinase-like protein; Has no detectable ceramide-kinase activity. Overexpression of CERKL protects cells from apoptosis in oxidative stress conditions
MCL	2	Salmon	37	CNGB1	Cyclic nucleotide-gated cation channel beta-1; Subunit of cyclic nucleotide-gated (CNG) channels, nonselective cation channels, which play important roles in both visual and olfactory signal transduction. When associated with CNGA1, it is involved in the regulation of ion flow into the rod photoreceptor outer segment (ROS), in response to light-induced alteration of the levels of intracellular cG…
MCL	2	Salmon	37	DYNC2H1	Cytoplasmic dynein 2 heavy chain 1; May function as a motor for intraflagellar retrograde transport. Functions in cilia biogenesis. May play a role in transport between endoplasmic reticulum and Golgi or organization of the Golgi in cells (By similarity); Dyneins, cytoplasmic
MCL	2	Salmon	37	EVC2	Ellis van creveld syndrome protein 2; Limbin; Component of the EvC complex that positively regulates ciliary Hedgehog (Hh) signaling. Plays a critical role in bone formation and skeletal development. May be involved in early embryonic morphogenesis
MCL	2	Salmon	37	EYS	Protein eyes shut homolog; Required to maintain the integrity of photoreceptor cells; Belongs to the EYS family
MCL	2	Salmon	37	GLI3	Transcriptional activator GLI3; Has a dual function as a transcriptional activator and a repressor of the sonic hedgehog (Shh) pathway, and plays a role in limb development. The full-length GLI3 form (GLI3FL) after phosphorylation and nuclear translocation, acts as an activator (GLI3A) while GLI3R, its C-terminally truncated form, acts as a repressor. A proper balance between the GLI3 activator a…
MCL	2	Salmon	37	GUCY2D	Retinal guanylyl cyclase 1; Probably plays a specific functional role in the rods and/or cones of photoreceptors. It may be the enzyme involved in the resynthesis of cGMP required for recovery of the dark state after phototransduction; Guanylate cyclase receptors
MCL	2	Salmon	37	HYLS1	HYLS1, centriolar and ciliogenesis associated; Hydrolethalus syndrome protein 1; Plays a role in ciliogenesis
MCL	2	Salmon	37	IFT74	Intraflagellar transport protein 74 homolog; Component of the intraflagellar transport (IFT) complex B: together with IFT81, forms a tubulin-binding module that specifically mediates transport of tubulin within the cilium. Binds beta-tubulin via its basic region. Required for ciliogenesis; Belongs to the IFT74 family
MCL	2	Salmon	37	IMPG2	Interphotoreceptor matrix proteoglycan 2; Chondroitin sulfate- and hyaluronan-binding proteoglycan involved in the organization of interphotoreceptor matrix; may participate in the maturation and maintenance of the light- sensitive photoreceptor outer segment. Binds heparin
MCL	2	Salmon	37	IQCB1	IQ calmodulin-binding motif-containing protein 1; Involved in ciliogenesis. The function in an early step in cilia formation depends on its association with CEP290/NPHP6. Involved in regulation of the BBSome complex integrity, specifically for presence of BBS2 and BBS5 in the complex, and in ciliary targeting of selected BBSome cargos. May play a role in controlling entry of the BBSome complex to…
MCL	2	Salmon	37	KIAA0586	Protein TALPID3; Required for ciliogenesis and sonic hedgehog/SHH signaling. Required for the centrosomal recruitment of RAB8A and for the targeting of centriole satellite proteins to centrosomes such as of PCM1. May play a role in early ciliogenesis in the disappearance of centriolar satellites that preceeds ciliary vesicle formation. Involved in regulation of cell intracellular organization. In…
MCL	2	Salmon	37	KIAA0753	Protein moonraker; Involved in centriole duplication. Positively regulates CEP63 centrosomal localization. Required for WDR62 centrosomal localization and promotes the centrosomal localization of CDK2
MCL	2	Salmon	37	MERTK	Tyrosine-protein kinase Mer; Receptor tyrosine kinase that transduces signals from the extracellular matrix into the cytoplasm by binding to several ligands including LGALS3, TUB, TULP1 or GAS6. Regulates many physiological processes including cell survival, migration, differentiation, and phagocytosis of apoptotic cells (efferocytosis). Ligand binding at the cell surface induces autophosphorylat…
MCL	2	Salmon	37	MKKS	McKusick-Kaufman/Bardet-Biedl syndromes putative chaperonin; Probable molecular chaperone. Assists the folding of proteins upon ATP hydrolysis. As part of the BBS/CCT complex plays a role in the assembly of BBSome, a complex involved in ciliogenesis regulating transports vesicles to the cilia. May play a role in protein processing in limb, cardiac and reproductive system development. May play a r…
MCL	2	Salmon	37	MKS1	Meckel syndrome type 1 protein; Component of the tectonic-like complex, a complex localized at the transition zone of primary cilia and acting as a barrier that prevents diffusion of transmembrane proteins between the cilia and plasma membranes. Involved in centrosome migration to the apical cell surface during early ciliogenesis. Required for ciliary structure and function, including a role in r…
MCL	2	Salmon	37	MYO7A	Unconventional myosin-VIIa; Myosins are actin-based motor molecules with ATPase activity. Unconventional myosins serve in intracellular movements. Their highly divergent tails bind to membranous compartments, which are then moved relative to actin filaments. In the retina, plays an important role in the renewal of the outer photoreceptor disks. Plays an important role in the distribution and migr…
MCL	2	Salmon	37	OFD1	Oral-facial-digital syndrome 1 protein; Component of the centrioles controlling mother and daughter centrioles length. Recruits to the centriole IFT88 and centriole distal appendage-specific proteins including CEP164. Involved in the biogenesis of the cilium, a centriole-associated function. The cilium is a cell surface projection found in many vertebrate cells required to transduce signals impor…
MCL	2	Salmon	37	PDE6B	Rod cGMP-specific 3',5'-cyclic phosphodiesterase subunit beta; This protein participates in processes of transmission and amplification of the visual signal. Necessary for the formation of a functional phosphodiesterase holoenzyme; Belongs to the cyclic nucleotide phosphodiesterase family
MCL	2	Salmon	37	RDH12	Retinol dehydrogenase 12; Exhibits an oxidoreductive catalytic activity towards retinoids. Most efficient as an NADPH-dependent retinal reductase. Displays high activity toward 9-cis and all-trans-retinol. Also involved in the metabolism of short-chain aldehydes. No steroid dehydrogenase activity detected. Might be the key enzyme in the formation of 11-cis-retinal from 11-cis-retinol during regen…
MCL	2	Salmon	37	RPGRIP1L	Protein fantom; Negatively regulates signaling through the G-protein coupled thromboxane A2 receptor (TBXA2R). May be involved in mechanisms like programmed cell death, craniofacial development, patterning of the limbs, and formation of the left- right axis (By similarity). Involved in the organization of apical junctions; the function is proposed to implicate a NPHP1-4-8 module. Does not seem to…
MCL	2	Salmon	37	TMEM107	Transmembrane protein 107; Plays a role in cilia formation and embryonic patterning. Requires for normal Sonic hedgehog (Shh) signaling in the neural tube and acts in combination with GLI2 and GLI3 to pattern ventral and intermediate neuronal cell types (By similarity). During ciliogenesis regulates the ciliary transition zone localization of some MKS complex proteins
MCL	2	Salmon	37	TMEM67	Transmembrane protein 67; Meckelin; Required for ciliary structure and function. Part of the tectonic-like complex which is required for tissue-specific ciliogenesis and may regulate ciliary membrane composition (By similarity). Involved in centrosome migration to the apical cell surface during early ciliogenesis. Involved in the regulation of cilia length and appropriate number through the contr…
MCL	2	Salmon	37	TRIM32	E3 ubiquitin-protein ligase TRIM32; Has an E3 ubiquitin ligase activity. Ubiquitinates DTNBP1 (dysbindin) and promotes its degradation. May ubiquitinate BBS2. May play a significant role in mediating the biological activity of the HIV-1 Tat protein in vivo. Binds specifically to the activation domain of HIV-1 Tat and can also interact with the HIV-2 and EIAV Tat proteins in vivo; Belongs to the T…
MCL	2	Salmon	37	TTC8	Tetratricopeptide repeat protein 8; The BBSome complex is thought to function as a coat complex required for sorting of specific membrane proteins to the primary cilia. The BBSome complex is required for ciliogenesis but is dispensable for centriolar satellite function. This ciliogenic function is mediated in part by the Rab8 GDP/GTP exchange factor, which localizes to the basal body and contacts…
MCL	2	Salmon	37	USH2A	Usherin; Involved in hearing and vision; Fibronectin type III domain containing
MCL	3	Saddle Brown	37	ABCC8	ATP-binding cassette sub-family C member 8; Subunit of the beta-cell ATP-sensitive potassium channel (KATP). Regulator of ATP-sensitive K(+) channels and insulin release; ATP binding cassette subfamily C
MCL	3	Saddle Brown	37	ANK2	Ankyrin-2; In skeletal muscle, required for proper localization of DMD and DCTN4 and for the formation and/or stability of a special subset of microtubules associated with costameres and neuromuscular junctions. Attaches integral membrane proteins to cytoskeletal elements. Also binds to cytoskeletal proteins. Required for coordinate assembly of Na/Ca exchanger, Na/K ATPase and InsP3 receptor at s…
MCL	3	Saddle Brown	37	ANO10	Anoctamin-10; Does not exhibit calcium-activated chloride channel (CaCC) activity. Can inhibit the activity of ANO1; Belongs to the anoctamin family
MCL	3	Saddle Brown	37	ARX	Homeobox protein ARX; Transcription factor required for normal brain development. May be important for maintenance of specific neuronal subtypes in the cerebral cortex and axonal guidance in the floor plate; Belongs to the paired homeobox family. Bicoid subfamily
MCL	3	Saddle Brown	37	CACNA1B	Voltage-dependent N-type calcium channel subunit alpha-1B; Voltage-sensitive calcium channels (VSCC) mediate the entry of calcium ions into excitable cells and are also involved in a variety of calcium-dependent processes, including muscle contraction, hormone or neurotransmitter release, gene expression, cell motility, cell division and cell death. The isoform alpha-1B gives rise to N-type calci…
MCL	3	Saddle Brown	37	CDC42BPB	Serine/threonine-protein kinase MRCK beta; Serine/threonine-protein kinase which is an important downstream effector of CDC42 and plays a role in the regulation of cytoskeleton reorganization and cell migration. Regulates actin cytoskeletal reorganization via phosphorylation of PPP1R12C and MYL9/MLC2. In concert with MYO18A and LURAP1, is involved in modulating lamellar actomyosin retrograde flow…
MCL	3	Saddle Brown	37	DEPDC5	Dep domain containing 5, gator1 subcomplex subunit; GATOR complex protein DEPDC5; As a component of the GATOR1 complex functions as an inhibitor of the amino acid-sensing branch of the TORC1 pathway. The GATOR1 complex strongly increases GTP hydrolysis by RRAGA and RRAGB within RRAGC-containing heterodimers, thereby deactivating RRAGs, releasing mTORC1 from lysosomal surface and inhibiting mTORC1…
MCL	3	Saddle Brown	37	DLG4	Disks large homolog 4; Interacts with the cytoplasmic tail of NMDA receptor subunits and shaker-type potassium channels. Required for synaptic plasticity associated with NMDA receptor signaling. Overexpression or depletion of DLG4 changes the ratio of excitatory to inhibitory synapses in hippocampal neurons. May reduce the amplitude of ASIC3 acid-evoked currents by retaining the channel intracell…
MCL	3	Saddle Brown	37	DMD	Dystrophin; Anchors the extracellular matrix to the cytoskeleton via F-actin. Ligand for dystroglycan. Component of the dystrophin- associated glycoprotein complex which accumulates at the neuromuscular junction (NMJ) and at a variety of synapses in the peripheral and central nervous systems and has a structural function in stabilizing the sarcolemma. Also implicated in signaling events and synap…
MCL	3	Saddle Brown	37	DMPK	Dystrophia myotonica-protein kinase; Myotonin-protein kinase; Non-receptor serine/threonine protein kinase which is necessary for the maintenance of skeletal muscle structure and function. May play a role in myocyte differentiation and survival by regulating the integrity of the nuclear envelope and the expression of muscle-specific genes. May also phosphorylate PPP1R12A and inhibit the myosin ph…
MCL	3	Saddle Brown	37	GABRB3	Gamma-aminobutyric acid receptor subunit beta-3; Component of the heteropentameric receptor for GABA, the major inhibitory neurotransmitter in the vertebrate brain. Functions also as histamine receptor and mediates cellular responses to histamine. Functions as receptor for diazepines and various anesthetics, such as pentobarbital; these are bound at a separate allosteric effector binding site. Fu…
MCL	3	Saddle Brown	37	GAN	Kelch-like protein 16 (gigaxonin); Gigaxonin; Probable cytoskeletal component that directly or indirectly plays an important role in neurofilament architecture. May act as a substrate-specific adapter of an E3 ubiquitin-protein ligase complex which mediates the ubiquitination and subsequent proteasomal degradation of target proteins. Controls degradation of TBCB. Controls degradation of MAP1B and…
MCL	3	Saddle Brown	37	GJA1	Gap junction alpha-1 protein; Gap junction protein that acts as a regulator of bladder capacity. A gap junction consists of a cluster of closely packed pairs of transmembrane channels, the connexons, through which materials of low MW diffuse from one cell to a neighboring cell. May play a critical role in the physiology of hearing by participating in the recycling of potassium to the cochlear end…
MCL	3	Saddle Brown	37	IQSEC2	IQ motif and SEC7 domain-containing protein 2; Is a guanine nucleotide exchange factor for the ARF GTP- binding proteins; X-linked mental retardation
MCL	3	Saddle Brown	37	KANSL1	KAT8 regulatory NSL complex subunit 1; As part of the NSL complex it is involved in acetylation of nucleosomal histone H4 on several lysine residues and therefore may be involved in the regulation of transcription
MCL	3	Saddle Brown	37	KCNQ2	Potassium voltage-gated channel subfamily KQT member 2; Associates with KCNQ3 to form a potassium channel with essentially identical properties to the channel underlying the native M-current, a slowly activating and deactivating potassium conductance which plays a critical role in determining the subthreshold electrical excitability of neurons as well as the responsiveness to synaptic inputs. The…
MCL	3	Saddle Brown	37	KCNT1	Potassium channel subfamily T member 1; Outwardly rectifying potassium channel subunit that may coassemble with other Slo-type channel subunits. Activated by high intracellular sodium or chloride levels. Activated upon stimulation of G-protein coupled receptors, such as CHRM1 and GRIA1. May be regulated by calcium in the absence of sodium ions (in vitro) (By similarity); Belongs to the potassium …
MCL	3	Saddle Brown	37	LMNA	Prelamin-A/C; Lamins are components of the nuclear lamina, a fibrous layer on the nucleoplasmic side of the inner nuclear membrane, which is thought to provide a framework for the nuclear envelope and may also interact with chromatin. Lamin A and C are present in equal amounts in the lamina of mammals. Plays an important role in nuclear assembly, chromatin organization, nuclear membrane and telom…
MCL	3	Saddle Brown	37	MECP2	Methyl-CpG-binding protein 2; Chromosomal protein that binds to methylated DNA. It can bind specifically to a single methyl-CpG pair. It is not influenced by sequences flanking the methyl-CpGs. Mediates transcriptional repression through interaction with histone deacetylase and the corepressor SIN3A. Binds both 5-methylcytosine (5mC) and 5-hydroxymethylcytosine (5hmC)-containing DNA, with a prefe…
MCL	3	Saddle Brown	37	MYH7	Myosin heavy chain 6/7; Myosin-7; Myosins are actin-based motor molecules with ATPase activity essential for muscle contraction. Forms regular bipolar thick filaments that, together with actin thin filaments, constitute the fundamental contractile unit of skeletal and cardiac muscle; Belongs to the TRAFAC class myosin-kinesin ATPase superfamily. Myosin family
MCL	3	Saddle Brown	37	NEB	Nebulin
MCL	3	Saddle Brown	37	PPOX	Protoporphyrinogen/coproporphyrinogen iii oxidase; Protoporphyrinogen oxidase; Catalyzes the 6-electron oxidation of protoporphyrinogen-IX to form protoporphyrin-IX
MCL	3	Saddle Brown	37	PRRT2	Proline rich transmembrane protein 2; Interferon induced transmembrane protein domain containing; Belongs to the CD225/Dispanin family
MCL	3	Saddle Brown	37	PUS3	tRNA pseudouridine(38/39) synthase; Formation of pseudouridine at position 39 in the anticodon stem and loop of transfer RNAs; Belongs to the tRNA pseudouridine synthase TruA family
MCL	3	Saddle Brown	37	RYR1	Ryanodine receptor 1; Calcium channel that mediates the release of Ca(2+) from the sarcoplasmic reticulum into the cytoplasm and thereby plays a key role in triggering muscle contraction following depolarization of T-tubules. Repeated very high-level exercise increases the open probability of the channel and leads to Ca(2+) leaking into the cytoplasm. Can also mediate the release of Ca(2+) from i…
MCL	3	Saddle Brown	37	RYR2	Ryanodine receptor 2; Calcium channel that mediates the release of Ca(2+) from the sarcoplasmic reticulum into the cytoplasm and thereby plays a key role in triggering cardiac muscle contraction. Aberrant channel activation can lead to cardiac arrhythmia. In cardiac myocytes, calcium release is triggered by increased Ca(2+) levels due to activation of the L-type calcium channel CACNA1C. The calci…
MCL	3	Saddle Brown	37	SCN1A	Sodium channel protein type 1 subunit alpha; Mediates the voltage-dependent sodium ion permeability of excitable membranes. Assuming opened or closed conformations in response to the voltage difference across the membrane, the protein forms a sodium-selective channel through which Na(+) ions may pass in accordance with their electrochemical gradient. Plays a key role in brain, probably by regulat…
MCL	3	Saddle Brown	37	SCN4A	Sodium channel protein type 4 subunit alpha; This protein mediates the voltage-dependent sodium ion permeability of excitable membranes. Assuming opened or closed conformations in response to the voltage difference across the membrane, the protein forms a sodium-selective channel through which Na(+) ions may pass in accordance with their electrochemical gradient. This sodium channel may be presen…
MCL	3	Saddle Brown	37	SCN9A	Sodium channel protein type 9 subunit alpha; Mediates the voltage-dependent sodium ion permeability of excitable membranes. Assuming opened or closed conformations in response to the voltage difference across the membrane, the protein forms a sodium-selective channel through which Na(+) ions may pass in accordance with their electrochemical gradient. It is a tetrodotoxin-sensitive Na(+) channel i…
MCL	3	Saddle Brown	37	SLC6A1	Sodium- and chloride-dependent GABA transporter 1; Terminates the action of GABA by its high affinity sodium-dependent reuptake into presynaptic terminals; Belongs to the sodium:neurotransmitter symporter (SNF) (TC 2.A.22) family. SLC6A1 subfamily
MCL	3	Saddle Brown	37	SPTAN1	Spectrin alpha chain, non-erythrocytic 1; Fodrin, which seems to be involved in secretion, interacts with calmodulin in a calcium-dependent manner and is thus candidate for the calcium-dependent movement of the cytoskeleton at the membrane; EF-hand domain containing
MCL	3	Saddle Brown	37	SPTBN2	Spectrin beta chain, non-erythrocytic 2; Probably plays an important role in neuronal membrane skeleton; Belongs to the spectrin family
MCL	3	Saddle Brown	37	STAC3	SH3 and cysteine-rich domain-containing protein 3; In skeletal muscles contraction, may play a role in neuromuscular synaptic transmission
MCL	3	Saddle Brown	37	SYNE1	Nesprin-1; Multi-isomeric modular protein which forms a linking network between organelles and the actin cytoskeleton to maintain the subcellular spatial organization. As a component of the LINC (LInker of Nucleoskeleton and Cytoskeleton) complex involved in the connection between the nuclear lamina and the cytoskeleton. The nucleocytoplasmic interactions established by the LINC complex play an i…
MCL	3	Saddle Brown	37	SYNGAP1	Ras/Rap GTPase-activating protein SynGAP; Major constituent of the PSD essential for postsynaptic signaling. Inhibitory regulator of the Ras-cAMP pathway. Member of the NMDAR signaling complex in excitatory synapses, it may play a role in NMDAR-dependent control of AMPAR potentiation, AMPAR membrane trafficking and synaptic plasticity. Regulates AMPAR- mediated miniature excitatory postsynaptic c…
MCL	3	Saddle Brown	37	TTN	Titin; Key component in the assembly and functioning of vertebrate striated muscles. By providing connections at the level of individual microfilaments, it contributes to the fine balance of forces between the two halves of the sarcomere. The size and extensibility of the cross-links are the main determinants of sarcomere extensibility properties of muscle. In non-muscle cells, seems to play a ro…
MCL	3	Saddle Brown	37	UNC80	Unc-80 homolog, NALCN channel complex subunit; Protein unc-80 homolog; Component of the NALCN sodium channel complex, required for channel regulation. This complex is a cation channel activated by neuropeptides substance P, neurotensin, and extracellular calcium that regulates neuronal excitability by controlling the sizes of NALCN-dependent sodium-leak current. UNC80 is essential for NALCN sensi…
MCL	4	Sandy Brown	28	ACAD9	Acyl-CoA dehydrogenase family member 9, mitochondrial; Required for mitochondrial complex I assembly. Has a dehydrogenase activity on palmitoyl-CoA (C16:0) and stearoyl-CoA (C18:0). It is three times more active on palmitoyl-CoA than on stearoyl-CoA. However, it does not play a primary role in long-chain fatty acid oxidation in vivo. Has little activity on octanoyl-CoA (C8:0), butyryl-CoA (C4:0) …
MCL	4	Sandy Brown	28	ACADM	Medium-chain specific acyl-CoA dehydrogenase, mitochondrial; Acyl-CoA dehydrogenase specific for acyl chain lengths of 4 to 16 that catalyzes the initial step of fatty acid beta- oxidation. Utilizes the electron transfer flavoprotein (ETF) as an electron acceptor to transfer electrons to the main mitochondrial respiratory chain via ETF-ubiquinone oxidoreductase (ETF dehydrogenase)
MCL	4	Sandy Brown	28	ACADSB	Short/branched chain specific acyl-CoA dehydrogenase, mitochondrial; Has greatest activity toward short branched chain acyl- CoA derivative such as (s)-2-methylbutyryl-CoA, isobutyryl-CoA, and 2-methylhexanoyl-CoA as well as toward short straight chain acyl-CoAs such as butyryl-CoA and hexanoyl-CoA. Can use valproyl- CoA as substrate and may play a role in controlling the metabolic flux of valpro…
MCL	4	Sandy Brown	28	ACO2	Aconitate hydratase, mitochondrial; Catalyzes the isomerization of citrate to isocitrate via cis-aconitate; Belongs to the aconitase/IPM isomerase family
MCL	4	Sandy Brown	28	ACSF3	Acyl-CoA synthetase family member 3, mitochondrial; Catalyzes the initial reaction in intramitochondrial fatty acid synthesis, by activating malonate and methylmalonate, but not acetate, into their respective CoA thioester. May have some preference toward very-long-chain substrates; Acyl-CoA synthetase family
MCL	4	Sandy Brown	28	ALDH7A1	Alpha-aminoadipic semialdehyde dehydrogenase; Multifunctional enzyme mediating important protective effects. Metabolizes betaine aldehyde to betaine, an important cellular osmolyte and methyl donor. Protects cells from oxidative stress by metabolizing a number of lipid peroxidation-derived aldehydes. Involved in lysine catabolism
MCL	4	Sandy Brown	28	ALDOB	Fructose-bisphosphate aldolase, class i; Belongs to the class I fructose-bisphosphate aldolase family
MCL	4	Sandy Brown	28	ATP5E	ATP synthase subunit epsilon, mitochondrial; Mitochondrial membrane ATP synthase (F(1)F(0) ATP synthase or Complex V) produces ATP from ADP in the presence of a proton gradient across the membrane which is generated by electron transport complexes of the respiratory chain. F-type ATPases consist of two structural domains, F(1) - containing the extramembraneous catalytic core, and F(0) - containin…
MCL	4	Sandy Brown	28	BCKDHB	2-oxoisovalerate dehydrogenase subunit beta, mitochondrial; The branched-chain alpha-keto dehydrogenase complex catalyzes the overall conversion of alpha-keto acids to acyl-CoA and CO(2). It contains multiple copies of three enzymatic components: branched-chain alpha-keto acid decarboxylase (E1), lipoamide acyltransferase (E2) and lipoamide dehydrogenase (E3)
MCL	4	Sandy Brown	28	BTD	Biotinidase; Catalytic release of biotin from biocytin, the product of biotin-dependent carboxylases degradation
MCL	4	Sandy Brown	28	ECHS1	Enoyl-CoA hydratase, mitochondrial; Straight-chain enoyl-CoA thioesters from C4 up to at least C16 are processed, although with decreasing catalytic rate. Has high substrate specificity for crotonyl-CoA and moderate specificity for acryloyl-CoA, 3-methylcrotonyl-CoA and methacrylyl-CoA. It is noteworthy that binds tiglyl-CoA, but hydrates only a small amount of this substrate
MCL	4	Sandy Brown	28	GCDH	Glutaryl-CoA dehydrogenase, mitochondrial; Catalyzes the oxidative decarboxylation of glutaryl-CoA to crotonyl-CoA and CO(2) in the degradative pathway of L-lysine, L-hydroxylysine, and L-tryptophan metabolism. It uses electron transfer flavoprotein as its electron acceptor. Isoform Short is inactive; Belongs to the acyl-CoA dehydrogenase family
MCL	4	Sandy Brown	28	GLDC	Glycine dehydrogenase (decarboxylating), mitochondrial; The glycine cleavage system catalyzes the degradation of glycine. The P protein (GLDC) binds the alpha-amino group of glycine through its pyridoxal phosphate cofactor; CO(2) is released and the remaining methylamine moiety is then transferred to the lipoamide cofactor of the H protein (GCSH)
MCL	4	Sandy Brown	28	HADHA	Trifunctional enzyme subunit alpha, mitochondrial; Bifunctional subunit; In the central section; belongs to the 3-hydroxyacyl- CoA dehydrogenase family
MCL	4	Sandy Brown	28	HLCS	Holocarboxylase synthetase; Biotin--protein ligase; Post-translational modification of specific protein by attachment of biotin. Acts on various carboxylases such as acetyl- CoA-carboxylase, pyruvate carboxylase, propionyl CoA carboxylase, and 3-methylcrotonyl CoA carboxylase
MCL	4	Sandy Brown	28	LIPT1	Lipoyltransferase 1, mitochondrial; Catalyzes the transfer of the lipoyl group from lipoyl- AMP to the specific lysine residue of lipoyl domains of lipoate- dependent enzymes; Belongs to the LplA family
MCL	4	Sandy Brown	28	MCCC1	Methylcrotonoyl-CoA carboxylase subunit alpha, mitochondrial; Biotin-attachment subunit of the 3-methylcrotonyl-CoA carboxylase, an enzyme that catalyzes the conversion of 3- methylcrotonyl-CoA to 3-methylglutaconyl-CoA, a critical step for leucine and isovaleric acid catabolism
MCL	4	Sandy Brown	28	MCCC2	Methylcrotonoyl-CoA carboxylase beta chain, mitochondrial; Carboxyltransferase subunit of the 3-methylcrotonyl-CoA carboxylase, an enzyme that catalyzes the conversion of 3- methylcrotonyl-CoA to 3-methylglutaconyl-CoA, a critical step for leucine and isovaleric acid catabolism; Belongs to the AccD/PCCB family
MCL	4	Sandy Brown	28	MMAA	Methylmalonic aciduria type A protein, mitochondrial; GTPase, binds and hydrolyzes GTP. Involved in intracellular vitamin B12 metabolism, mediates the transport of cobalamin (Cbl) into mitochondria for the final steps of adenosylcobalamin (AdoCbl) synthesis. Functions as a G-protein chaperone that assists AdoCbl cofactor delivery from MMAB to the methylmalonyl-CoA mutase (MUT) and reactivation of…
MCL	4	Sandy Brown	28	MMACHC	Cyanocobalamin reductase (cyanide-eliminating) / alkylcobalamin dealkylase; Methylmalonic aciduria and homocystinuria type C protein; Catalyzes the reductive dealkylation of cyanocobalamin to cob(II)alamin, using FAD or FMN as cofactor and NADPH as cosubstrate. Can also catalyze the glutathione-dependent reductive demethylation of methylcobalamin, and, with much lower efficiency, the glutathione-…
MCL	4	Sandy Brown	28	NDUFAF2	NADH dehydrogenase [ubiquinone] 1 alpha subcomplex assembly factor 2; Acts as a molecular chaperone for mitochondrial complex I assembly. Complex I functions in the transfer of electrons from NADH to the respiratory chain. The immediate electron acceptor for the enzyme is believed to be ubiquinone
MCL	4	Sandy Brown	28	NDUFB3	NADH dehydrogenase [ubiquinone] 1 beta subcomplex subunit 3; Accessory subunit of the mitochondrial membrane respiratory chain NADH dehydrogenase (Complex I), that is believed not to be involved in catalysis. Complex I functions in the transfer of electrons from NADH to the respiratory chain. The immediate electron acceptor for the enzyme is believed to be ubiquinone
MCL	4	Sandy Brown	28	NDUFB9	NADH dehydrogenase [ubiquinone] 1 beta subcomplex subunit 9; Accessory subunit of the mitochondrial membrane respiratory chain NADH dehydrogenase (Complex I), that is believed to be not involved in catalysis. Complex I functions in the transfer of electrons from NADH to the respiratory chain. The immediate electron acceptor for the enzyme is believed to be ubiquinone
MCL	4	Sandy Brown	28	PCCA	This is one of the 2 subunits of the biotin-dependent propionyl-CoA carboxylase (PCC), a mitochondrial enzyme involved in the catabolism of odd chain fatty acids, branched-chain amino acids isoleucine, threonine, methionine, and valine and other metabolites . Propionyl-CoA carboxylase catalyzes the carboxylation of propionyl-CoA/propanoyl-CoA to D-methylmalonyl- CoA/(S)-methylmalonyl-CoA Within t…
MCL	4	Sandy Brown	28	PCCB	This is one of the 2 subunits of the biotin-dependent propionyl-CoA carboxylase (PCC), a mitochondrial enzyme involved in the catabolism of odd chain fatty acids, branched-chain amino acids isoleucine, threonine, methionine, and valine and other metabolites . Propionyl-CoA carboxylase catalyzes the carboxylation of propionyl-CoA/propanoyl-CoA to D-methylmalonyl- CoA/(S)-methylmalonyl-CoA . Within…
MCL	4	Sandy Brown	28	SDHA	Succinate dehydrogenase [ubiquinone] flavoprotein subunit, mitochondrial; Flavoprotein (FP) subunit of succinate dehydrogenase (SDH) that is involved in complex II of the mitochondrial electron transport chain and is responsible for transferring electrons from succinate to ubiquinone (coenzyme Q). Can act as a tumor suppressor; Belongs to the FAD-dependent oxidoreductase 2 family. FRD/SDH subfami…
MCL	4	Sandy Brown	28	SHMT2	Serine hydroxymethyltransferase, mitochondrial; Contributes to the de novo mitochondrial thymidylate biosynthesis pathway via its role in glycine and tetrahydrofolate metabolism. Thymidylate biosynthesis is required to prevent uracil accumulation in mtDNA. Interconversion of serine and glycine. Associates with mitochondrial DNA. Plays a role in the deubiquitination of target proteins as component…
MCL	4	Sandy Brown	28	TMEM126B	Complex I assembly factor TMEM126B, mitochondrial; Chaperone protein involved in the assembly of the mitochondrial NADH:ubiquinone oxidoreductase complex (complex I). Participates in constructing the membrane arm of complex I
MCL	5	Brown	16	ABCC9	ATP-binding cassette sub-family C member 9; Subunit of ATP-sensitive potassium channels (KATP). Can form cardiac and smooth muscle-type KATP channels with KCNJ11. KCNJ11 forms the channel pore while ABCC9 is required for activation and regulation; Belongs to the ABC transporter superfamily. ABCC family. Conjugate transporter (TC 3.A.1.208) subfamily
MCL	5	Brown	16	BSND	Barttin (chloride channel ka/b beta subunit); Barttin; Functions as a beta-subunit for CLCNKA and CLCNKB chloride channels. In the kidney CLCNK/BSND heteromers mediate chloride reabsorption by facilitating its basolateral efflux. In the stria, CLCNK/BSND channels drive potassium secretion by recycling chloride for the basolateral SLC12A2 cotransporter
MCL	5	Brown	16	COL11A2	Collagen alpha-2(XI) chain; May play an important role in fibrillogenesis by controlling lateral growth of collagen II fibrils; Collagens
MCL	5	Brown	16	DUOX2	Dual oxidase 2; Generates hydrogen peroxide which is required for the activity of thyroid peroxidase/TPO and lactoperoxidase/LPO. Plays a role in thyroid hormones synthesis and lactoperoxidase-mediated antimicrobial defense at the surface of mucosa. May have its own peroxidase activity through its N-terminal peroxidase-like domain
MCL	5	Brown	16	FOXE1	Forkhead box protein E1; Transcription factor that binds consensus sites on a variety of gene promoters and activate their transcription. Involved in proper palate formation, most probably through the expression of MSX1 and TGFB3 genes which are direct targets of this transcription factor. Also implicated in thyroid gland morphogenesis. May indirectly play a role in cell growth and migration thro…
MCL	5	Brown	16	GJB2	Gap junction beta-2 protein; One gap junction consists of a cluster of closely packed pairs of transmembrane channels, the connexons, through which materials of low MW diffuse from one cell to a neighboring cell; Deafness associated genes
MCL	5	Brown	16	GPSM2	G-protein-signaling modulator 2; Plays an important role in mitotic spindle pole organization via its interaction with NUMA1. Required for cortical dynein- dynactin complex recruitment during metaphase. Plays a role in metaphase spindle orientation. Plays also an important role in asymmetric cell divisions. Has guanine nucleotide dissociation inhibitor (GDI) activity towards G(i) alpha proteins, …
MCL	5	Brown	16	KCNJ1	ATP-sensitive inward rectifier potassium channel 1; In the kidney, probably plays a major role in potassium homeostasis. Inward rectifier potassium channels are characterized by a greater tendency to allow potassium to flow into the cell rather than out of it. Their voltage dependence is regulated by the concentration of extracellular potassium; as external potassium is raised, the voltage range …
MCL	5	Brown	16	NKX2-1	Homeobox protein Nkx-2.1; Transcription factor that binds and activates the promoter of thyroid specific genes such as thyroglobulin, thyroperoxidase, and thyrotropin receptor. Crucial in the maintenance of the thyroid differentiation phenotype. May play a role in lung development and surfactant homeostasis. Forms a regulatory loop with GRHL2 that coordinates lung epithelial cell morphogenesis an…
MCL	5	Brown	16	PAH	Phenylalanine-4-hydroxylase; Catalyzes the hydroxylation of L-phenylalanine to L-tyrosine
MCL	5	Brown	16	SLC12A1	Solute carrier family 12 member 1; Electrically silent transporter system. Mediates sodium and chloride reabsorption. Plays a vital role in the regulation of ionic balance and cell volume; Belongs to the SLC12A transporter family
MCL	5	Brown	16	SLC26A4	Solute carrier family 26 (sodium-independent chloride/iodide transporter), member 4; Pendrin; Sodium-independent transporter of chloride and iodide; Belongs to the SLC26A/SulP transporter (TC 2.A.53) family
MCL	5	Brown	16	TPO	Thyroid peroxidase; Iodination and coupling of the hormonogenic tyrosines in thyroglobulin to yield the thyroid hormones T(3) and T(4); Belongs to the peroxidase family. XPO subfamily
MCL	5	Brown	16	TSEN54	tRNA-splicing endonuclease subunit Sen54; Non-catalytic subunit of the tRNA-splicing endonuclease complex, a complex responsible for identification and cleavage of the splice sites in pre-tRNA. It cleaves pre-tRNA at the 5' and 3' splice sites to release the intron. The products are an intron and two tRNA half-molecules bearing 2',3' cyclic phosphate and 5'-OH termini. There are no conserved sequ…
MCL	5	Brown	16	TSHR	Thyrotropin receptor; Receptor for the thyroid-stimulating hormone (TSH) or thyrotropin. Also acts as a receptor for the heterodimeric glycoprotein hormone (GPHA2:GPHB5) or thyrostimulin. The activity of this receptor is mediated by G proteins which activate adenylate cyclase. Plays a central role in controlling thyroid cell metabolism (By similarity); Belongs to the G-protein coupled receptor 1 …
MCL	5	Brown	16	WFS1	Wolframin er transmembrane glycoprotein; Wolframin; Participates in the regulation of cellular Ca(2+) homeostasis, at least partly, by modulating the filling state of the endoplasmic reticulum Ca(2+) store; Deafness associated genes
MCL	6	Yellow	14	ARSA	Arylsulfatase A; Hydrolyzes cerebroside sulfate; Belongs to the sulfatase family
MCL	6	Yellow	14	ASAH1	N-acylsphingosine amidohydrolase 1; Acid ceramidase; Hydrolyzes the sphingolipid ceramide into sphingosine and free fatty acid
MCL	6	Yellow	14	ATP7B	Copper-transporting ATPase 2; Copper ion transmembrane transporter involved in the export of copper out of the cells, such as the efflux of hepatic copper into the bile; ATPase copper transporting
MCL	6	Yellow	14	COL4A3BP	Collagen type IV alpha-3-binding protein; Shelters ceramides and diacylglycerol lipids inside its START domain and mediates the intracellular trafficking of ceramides and diacylglycerol lipids in a non-vesicular manner; Pleckstrin homology domain containing
MCL	6	Yellow	14	CP	Ceruloplasmin; Ceruloplasmin is a blue, copper-binding (6-7 atoms per molecule) glycoprotein. It has ferroxidase activity oxidizing Fe(2+) to Fe(3+) without releasing radical oxygen species. It is involved in iron transport across the cell membrane. Provides Cu(2+) ions for the ascorbate-mediated deaminase degradation of the heparan sulfate chains of GPC1. May also play a role in fetal lung devel…
MCL	6	Yellow	14	FLCN	Folliculin; May be a tumor suppressor. May be involved in energy and/or nutrient sensing through the AMPK and mTOR signaling pathways. May regulate phosphorylation of RPS6KB1; DENN/MADD domain containing
MCL	6	Yellow	14	GALC	Galactosylceramidase; Galactocerebrosidase; Hydrolyzes the galactose ester bonds of galactosylceramide, galactosylsphingosine, lactosylceramide, and monogalactosyldiglyceride. Enzyme with very low activity responsible for the lysosomal catabolism of galactosylceramide, a major lipid in myelin, kidney and epithelial cells of small intestine and colon; Belongs to the glycosyl hydrolase 59 family
MCL	6	Yellow	14	HEXA	Beta-hexosaminidase subunit alpha; Responsible for the degradation of GM2 gangliosides, and a variety of other molecules containing terminal N-acetyl hexosamines, in the brain and other tissues. The form B is active against certain oligosaccharides. The form S has no measurable activity; Belongs to the glycosyl hydrolase 20 family
MCL	6	Yellow	14	HGSNAT	Heparan-alpha-glucosaminide N-acetyltransferase; Lysosomal acetyltransferase that acetylates the non- reducing terminal alpha-glucosamine residue of intralysosomal heparin or heparan sulfate, converting it into a substrate for luminal alpha-N-acetyl glucosaminidase
MCL	6	Yellow	14	MADD	MAP kinase-activating death domain protein; Plays a significant role in regulating cell proliferation, survival and death through alternative mRNA splicing. Isoform 5 shows increased cell proliferation and isoform 2 shows decreased. Converts GDP-bound inactive form of RAB3A, RAB3C and RAB3D to the GTP-bound active forms. Component of the TNFRSF1A signaling complex: MADD links TNFRSF1A with MAP ki…
MCL	6	Yellow	14	NAGA	Alpha-N-acetylgalactosaminidase; Removes terminal alpha-N-acetylgalactosamine residues from glycolipids and glycopeptides. Required for the breakdown of glycolipids
MCL	6	Yellow	14	SGSH	N-sulphoglucosamine sulphohydrolase; Catalyzes a step in lysosomal heparan sulfate degradation; Belongs to the sulfatase family
MCL	6	Yellow	14	SMPD1	Sphingomyelin phosphodiesterase; Converts sphingomyelin to ceramide. Also has phospholipase C activities toward 1,2-diacylglycerolphosphocholine and 1,2-diacylglycerolphosphoglycerol
MCL	6	Yellow	14	TBCK	TBC domain-containing protein kinase-like protein; Involved in the modulation of mTOR signaling and expression of mTOR complex components. Involved in the regulation of cell proliferation and growth. Involved in the control of actin-cytoskeleton organization
MCL	7	Olive	14	ALG1	Chitobiosyldiphosphodolichol beta-mannosyltransferase; Participates in the formation of the lipid-linked precursor oligosaccharide for N-glycosylation. Involved in assembling the dolichol-pyrophosphate-GlcNAc(2)-Man(5) intermediate on the cytoplasmic surface of the ER; Belongs to the glycosyltransferase group 1 family. Glycosyltransferase 33 subfamily
MCL	7	Olive	14	ANO5	Anoctamin-5; Does not exhibit calcium-activated chloride channel (CaCC) activity; Anoctamins
MCL	7	Olive	14	B3GALNT2	UDP-GalNAc:beta-1,3-N-acetylgalactosaminyltransferase 2; Beta-1,3-N-acetylgalactosaminyltransferase that synthesizes a unique carbohydrate structure, GalNAc-beta-1- 3GlcNAc, on N- and O-glycans. Has no galactose nor galactosaminyl transferase activity toward any acceptor substrate. Involved in alpha-dystroglycan (DAG1) glycosylation: acts coordinately with GTDC2/POMGnT2 to synthesize a GalNAc-bet…
MCL	7	Olive	14	DPAGT1	UDP-N-acetylglucosamine--dolichyl-phosphate N-acetylglucosaminephosphotransferase; Catalyzes the initial step in the synthesis of dolichol- P-P-oligosaccharides
MCL	7	Olive	14	FBN1	Fibrillin-1; Fibrillin-1: Structural component of the 10-12 nm diameter microfibrils of the extracellular matrix, which conveys both structural and regulatory properties to load-bearing connective tissues. Fibrillin-1- containing microfibrils provide long-term force bearing structural support. In tissues such as the lung, blood vessels and skin, microfibrils form the periphery of the elastic fibe…
MCL	7	Olive	14	FKRP	Fukutin-related protein; Transferase involved in the biosynthesis of the phosphorylated O-mannosyl trisaccharide (N-acetylgalactosamine- beta-3-N-acetylglucosamine-beta-4-(phosphate-6-)mannose), a carbohydrate structure present in alpha-dystroglycan (DAG1), which is required for binding laminin G-like domain-containing extracellular proteins with high affinity
MCL	7	Olive	14	GALT	UDPglucose--hexose-1-phosphate uridylyltransferase; Galactose-1-phosphate uridylyltransferase; Plays an important role in galactose metabolism
MCL	7	Olive	14	GMPPB	Mannose-1-phosphate guanyltransferase beta; Catalyzes the formation of GDP-mannose, an essential precursor of glycan moieties of glycoproteins and glycolipids; Belongs to the transferase hexapeptide repeat family
MCL	7	Olive	14	GPI	Glucose-6-phosphate isomerase; Besides it's role as a glycolytic enzyme, mammalian GPI can function as a tumor-secreted cytokine and an angiogenic factor (AMF) that stimulates endothelial cell motility. GPI is also a neurotrophic factor (Neuroleukin) for spinal and sensory neurons
MCL	7	Olive	14	LAMA2	Laminin subunit alpha-2; Binding to cells via a high affinity receptor, laminin is thought to mediate the attachment, migration and organization of cells into tissues during embryonic development by interacting with other extracellular matrix components
MCL	7	Olive	14	PMM2	Phosphomannomutase 2; Involved in the synthesis of the GDP-mannose and dolichol-phosphate-mannose required for a number of critical mannosyl transfer reactions; HAD Asp-based non-protein phosphatases
MCL	7	Olive	14	PREPL	Prolyl endopeptidase-like; Probable serine peptidase whose precise substrate specificity remains unclear. Does not cleave peptides after a arginine or lysine residue. May play a role in the regulation of synaptic vesiscle exocytosis
MCL	7	Olive	14	SRD5A3	3-oxo-5-alpha-steroid 4-dehydrogenase 3 / polyprenol reductase; Polyprenol reductase; Plays a key role in early steps of protein N-linked glycosylation by being required for the conversion of polyprenol into dolichol. Dolichols are required for the synthesis of dolichol-linked monosaccharides and the oligosaccharide precursor used for N-glycosylation. Acts as a polyprenol reductase that promotes …
MCL	7	Olive	14	TGDS	dTDP-D-glucose 4,6-dehydratase; Short chain dehydrogenase/reductase superfamily
MCL	8	Green	11	ALDH3A2	Aldehyde dehydrogenase 3 family member a2; Fatty aldehyde dehydrogenase; Catalyzes the oxidation of long-chain aliphatic aldehydes to fatty acids. Active on a variety of saturated and unsaturated aliphatic aldehydes between 6 and 24 carbons in length. Responsible for conversion of the sphingosine 1-phosphate (S1P) degradation product hexadecenal to hexadecenoic acid
MCL	8	Green	11	DNM1	Dynamin-1; Microtubule-associated force-producing protein involved in producing microtubule bundles and able to bind and hydrolyze GTP. Most probably involved in vesicular trafficking processes. Involved in receptor-mediated endocytosis; Pleckstrin homology domain containing
MCL	8	Green	11	MOCS2	Molybdopterin synthase catalytic subunit; Catalytic subunit of the molybdopterin synthase complex, a complex that catalyzes the conversion of precursor Z into molybdopterin. Acts by mediating the incorporation of 2 sulfur atoms from thiocarboxylated MOCS2A into precursor Z to generate a dithiolene group; Belongs to the MoaE family. MOCS2B subfamily
MCL	8	Green	11	PEX1	Peroxisomal biogenesis factor 1; Peroxisome biogenesis factor 1; Required for stability of PEX5 and protein import into the peroxisome matrix. Anchored by PEX26 to peroxisome membranes, possibly to form heteromeric AAA ATPase complexes required for the import of proteins into peroxisomes
MCL	8	Green	11	PEX10	Peroxisome biogenesis factor 10; Somewhat implicated in the biogenesis of peroxisomes; Peroxins
MCL	8	Green	11	PEX11B	Peroxisomal membrane protein 11B; Involved in peroxisomal proliferation. May regulate peroxisome division by recruiting the dynamin-related GTPase DNM1L to the peroxisomal membrane. Promotes membrane protrusion and elongation on the peroxisomal surface; Belongs to the peroxin-11 family
MCL	8	Green	11	PEX2	Peroxisome biogenesis factor 2; Somewhat implicated in the biogenesis of peroxisomes; Belongs to the pex2/pex10/pex12 family
MCL	8	Green	11	PEX6	Peroxisomal biogenesis factor 6; Peroxisome assembly factor 2; Involved in peroxisome biosynthesis. Required for stability of the PTS1 receptor. Anchored by PEX26 to peroxisome membranes, possibly to form heteromeric AAA ATPase complexes required for the import of proteins into peroxisomes
MCL	8	Green	11	PHYH	Phytanoyl-CoA dioxygenase, peroxisomal; Converts phytanoyl-CoA to 2-hydroxyphytanoyl-CoA
MCL	8	Green	11	PTPN23	Tyrosine-protein phosphatase non-receptor type 23; Plays a role in sorting of endocytic ubiquitinated cargos into multivesicular bodies (MVBs) via its interaction with the ESCRT-I complex (endosomal sorting complex required for transport I), and possibly also other ESCRT complexes. May act as a negative regulator of Ras-mediated mitogenic activity. Plays a role in ciliogenesis; Protein tyrosine p…
MCL	8	Green	11	TRIM37	E3 ubiquitin-protein ligase TRIM37; E3 ubiquitin-protein ligase required to prevent centriole reduplication. Probably acts by ubiquitinating positive regulators of centriole reduplication. Mediates monoubiquitination of 'Lys-119' of histone H2A (H2AK119Ub), a specific tag for epigenetic transcriptional repression: associates with some Polycomb group (PcG) multiprotein PRC2-like complex and mediat…
MCL	9	Lime Green	8	ADCK3	Atypical kinase COQ8A, mitochondrial; Atypical kinase involved in the biosynthesis of coenzyme Q, also named ubiquinone, an essential lipid-soluble electron transporter for aerobic cellular respiration. Its substrate specificity is unclear: does not show any protein kinase activity. Probably acts as a small molecule kinase, possibly a lipid kinase that phosphorylates a prenyl lipid in the ubiquin…
MCL	9	Lime Green	8	AP5Z1	AP-5 complex subunit zeta-1; As part of AP-5, a probable fifth adaptor protein complex it may be involved in endosomal transport. According to it is a putative helicase required for efficient homologous recombination DNA double-strand break repair; Armadillo-like helical domain containing
MCL	9	Lime Green	8	COASY	Bifunctional coenzyme A synthase; Bifunctional enzyme that catalyzes the fourth and fifth sequential steps of CoA biosynthetic pathway. The fourth reaction is catalyzed by the phosphopantetheine adenylyltransferase, coded by the coaD domain; the fifth reaction is catalyzed by the dephospho-CoA kinase, coded by the coaE domain. May act as a point of CoA biosynthesis regulation; In the central sect…
MCL	9	Lime Green	8	FA2H	Fatty acid 2-hydroxylase; Required for alpha-hydroxylation of free fatty acids and the formation of alpha-hydroxylated sphingolipids; Belongs to the sterol desaturase family. SCS7 subfamily
MCL	9	Lime Green	8	SACS	Sacsin; Co-chaperone which acts as a regulator of the Hsp70 chaperone machinery and may be involved in the processing of other ataxia-linked proteins; DNAJ heat shock proteins
MCL	9	Lime Green	8	SPG7	Paraplegin; ATP-dependent zinc metalloprotease. Plays a role in the formation and regulation of the mitochondrial permeability transition pore (mPTP) and its proteolytic activity is dispensable for this function; In the N-terminal section; belongs to the AAA ATPase family
MCL	9	Lime Green	8	WDR45	WD repeat domain phosphoinositide-interacting protein 4; Plays an important role in the autophagy pathway, which is the major intracellular degradation system by which cytoplasmic materials are packaged into autophagosomes and delivered to lysosomes for degradation; Belongs to the WD repeat SVP1 family
MCL	9	Lime Green	8	ZFYVE26	Zinc finger FYVE domain-containing protein 26; Phosphatidylinositol 3-phosphate-binding protein required for the abcission step in cytokinesis: recruited to the midbody during cytokinesis and acts as a regulator of abcission. May also be required for efficient homologous recombination DNA double-strand break repair; Zinc fingers FYVE-type
MCL	10	Light Green	8	ACY1	ABHD14A-ACY1 readthrough; Aminoacylase-1; Involved in the hydrolysis of N-acylated or N-acetylated amino acids (except L-aspartate); Belongs to the peptidase M20A family
MCL	10	Light Green	8	ADSL	Adenylosuccinate lyase; Catalyzes two non-sequential steps in de novo AMP synthesis: converts (S)-2-(5-amino-1-(5-phospho-D- ribosyl)imidazole-4-carboxamido)succinate (SAICAR) to fumarate plus 5-amino-1-(5-phospho-D-ribosyl)imidazole-4-carboxamide, and thereby also contributes to de novo IMP synthesis, and converts succinyladenosine monophosphate (SAMP) to AMP and fumarate; Belongs to the lyase 1…
MCL	10	Light Green	8	ASL	Argininosuccinate lyase
MCL	10	Light Green	8	CPA6	Carboxypeptidase A6; May be involved in the proteolytic inactivation of enkephalins and neurotensin in some brain areas. May convert inactive angiotensin I into the biologically active angiotensin II. Releases a C-terminal amino acid, with preference for large hydrophobic C-terminal amino acids and shows only very weak activity toward small amino acids and histidine; M14 carboxypeptidases
MCL	10	Light Green	8	CPS1	Carbamoyl-phosphate synthase [ammonia], mitochondrial; Involved in the urea cycle of ureotelic animals where the enzyme plays an important role in removing excess ammonia from the cell
MCL	10	Light Green	8	DPYD	Dihydropyrimidine dehydrogenase [NADP(+)]; Involved in pyrimidine base degradation. Catalyzes the reduction of uracil and thymine. Also involved the degradation of the chemotherapeutic drug 5-fluorouracil; Belongs to the dihydropyrimidine dehydrogenase family
MCL	10	Light Green	8	DPYS	Dihydropyrimidinase; Catalyzes the second step of the reductive pyrimidine degradation, the reversible hydrolytic ring opening of dihydropyrimidines. Can catalyze the ring opening of 5,6- dihydrouracil to N-carbamyl-alanine and of 5,6-dihydrothymine to N-carbamyl-amino isobutyrate
MCL	10	Light Green	8	HPDL	4-hydroxyphenylpyruvate dioxygenase-like protein; May have dioxygenase activity
MCL	11	Sky Blue	7	APC	Adenomatous polyposis coli protein; Tumor suppressor. Promotes rapid degradation of CTNNB1 and participates in Wnt signaling as a negative regulator. APC activity is correlated with its phosphorylation state. Activates the GEF activity of SPATA13 and ARHGEF4. Plays a role in hepatocyte growth factor (HGF)-induced cell migration. Required for MMP9 up-regulation via the JNK signaling pathway in col…
MCL	11	Sky Blue	7	DST	Dystonin; Cytoskeletal linker protein. Acts as an integrator of intermediate filaments, actin and microtubule cytoskeleton networks. Required for anchoring either intermediate filaments to the actin cytoskeleton in neural and muscle cells or keratin- containing intermediate filaments to hemidesmosomes in epithelial cells. The proteins may self-aggregate to form filaments or a two- dimensional mes…
MCL	11	Sky Blue	7	FTCD	Formimidoyltransferase-cyclodeaminase; Folate-dependent enzyme, that displays both transferase and deaminase activity. Serves to channel one-carbon units from formiminoglutamate to the folate pool; In the N-terminal section; belongs to the formiminotransferase family
MCL	11	Sky Blue	7	LRP5	Low-density lipoprotein receptor-related protein 5; Component of the Wnt-Fzd-LRP5-LRP6 complex that triggers beta-catenin signaling through inducing aggregation of receptor- ligand complexes into ribosome-sized signalsomes. Cell-surface coreceptor of Wnt/beta-catenin signaling, which plays a pivotal role in bone formation. Plays a role in norrin (NDP) signal transduction. The Wnt-induced Fzd/LRP6…
MCL	11	Sky Blue	7	PPP2R5D	Serine/threonine-protein phosphatase 2A 56 kDa regulatory subunit delta isoform; The B regulatory subunit might modulate substrate selectivity and catalytic activity, and also might direct the localization of the catalytic enzyme to a particular subcellular compartment; Belongs to the phosphatase 2A regulatory subunit B56 family
MCL	11	Sky Blue	7	PRKAR1A	cAMP-dependent protein kinase type I-alpha regulatory subunit; Regulatory subunit of the cAMP-dependent protein kinases involved in cAMP signaling in cells
MCL	11	Sky Blue	7	PROC	Vitamin K-dependent protein C; Protein C is a vitamin K-dependent serine protease that regulates blood coagulation by inactivating factors Va and VIIIa in the presence of calcium ions and phospholipids. Exerts a protective effect on the endothelial cell barrier function; Belongs to the peptidase S1 family
MCL	12	Sky Blue 2	7	ADAR	Double-stranded RNA-specific adenosine deaminase; Catalyzes the hydrolytic deamination of adenosine to inosine in double-stranded RNA (dsRNA) referred to as A-to-I RNA editing. This may affect gene expression and function in a number of ways that include mRNA translation by changing codons and hence the amino acid sequence of proteins; pre-mRNA splicing by altering splice site recognition sequenc…
MCL	12	Sky Blue 2	7	IFIH1	Interferon-induced helicase C domain-containing protein 1; Innate immune receptor which acts as a cytoplasmic sensor of viral nucleic acids and plays a major role in sensing viral infection and in the activation of a cascade of antiviral responses including the induction of type I interferons and proinflammatory cytokines. Its ligands include mRNA lacking 2'-O- methylation at their 5' cap and lon…
MCL	12	Sky Blue 2	7	IKBKG	NF-kappa-B essential modulator; Regulatory subunit of the IKK core complex which phosphorylates inhibitors of NF-kappa-B thus leading to the dissociation of the inhibitor/NF-kappa-B complex and ultimately the degradation of the inhibitor. Its binding to scaffolding polyubiquitin seems to play a role in IKK activation by multiple signaling receptor pathways. However, the specific type of polyubiqu…
MCL	12	Sky Blue 2	7	LARP7	La-related protein 7; Negative transcriptional regulator of polymerase II genes, acting by means of the 7SK RNP system. Within the 7SK RNP complex, the positive transcription elongation factor b (P-TEFb) is sequestered in an inactive form, preventing RNA polymerase II phosphorylation and subsequent transcriptional elongation; La ribonucleoprotein domain containing
MCL	12	Sky Blue 2	7	PURA	Transcriptional activator protein Pur-alpha; This is a probable transcription activator that specifically binds the purine-rich single strand of the PUR element located upstream of the MYC gene. May play a role in the initiation of DNA replication and in recombination
MCL	12	Sky Blue 2	7	RBM8A	RNA-binding protein 8A; Core component of the splicing-dependent multiprotein exon junction complex (EJC) deposited at splice junctions on mRNAs. The EJC is a dynamic structure consisting of core proteins and several peripheral nuclear and cytoplasmic associated factors that join the complex only transiently either during EJC assembly or during subsequent mRNA metabolism. The EJC marks the positi…
MCL	12	Sky Blue 2	7	RNASEH2B	Ribonuclease H2 subunit B; Non catalytic subunit of RNase H2, an endonuclease that specifically degrades the RNA of RNA:DNA hybrids. Participates in DNA replication, possibly by mediating the removal of lagging- strand Okazaki fragment RNA primers during DNA replication. Mediates the excision of single ribonucleotides from DNA:RNA duplexes
MCL	13	Blue	6	CLPB	Caseinolytic peptidase B protein homolog; May function as a regulatory ATPase and be related to secretion/protein trafficking process; AAA ATPases
MCL	13	Blue	6	DHX37	Probable ATP-dependent RNA helicase DHX37; DEAH-box helicase 37
MCL	13	Blue	6	DOCK7	Dedicator of cytokinesis protein 7; Functions as a guanine nucleotide exchange factor (GEF), which activates Rac1 and Rac3 Rho small GTPases by exchanging bound GDP for free GTP. Does not have a GEF activity for CDC42. Required for STMN1 'Ser-15' phosphorylation during axon formation and consequently for neuronal polarization. Has a role in pigmentation (By similarity). Involved in the regulation…
MCL	13	Blue	6	KIAA1033	WASH complex subunit 4; Acts at least in part as component of the WASH core complex whose assembly at the surface of endosomes seems to inhibit WASH nucleation-promoting factor (NPF) activity in recruiting and activating the Arp2/3 complex to induce actin polymerization, and which is involved in the regulation of the fission of tubules that serve as transport intermediates during endosome sorting
MCL	13	Blue	6	POLR3B	DNA-directed RNA polymerase III subunit RPC2; DNA-dependent RNA polymerase catalyzes the transcription of DNA into RNA using the four ribonucleoside triphosphates as substrates. Second largest core component of RNA polymerase III which synthesizes small RNAs, such as 5S rRNA and tRNAs. Proposed to contribute to the polymerase catalytic activity and forms the polymerase active center together with…
MCL	13	Blue	6	SIL1	Nucleotide exchange factor SIL1; Required for protein translocation and folding in the endoplasmic reticulum (ER). Functions as a nucleotide exchange factor for the ER lumenal chaperone HSPA5; Belongs to the SIL1 family
MCL	14	Medium Slate Blue 2	5	APOE	Apolipoprotein E; Mediates the binding, internalization, and catabolism of lipoprotein particles. It can serve as a ligand for the LDL (apo B/E) receptor and for the specific apo-E receptor (chylomicron remnant) of hepatic tissues; Apolipoproteins
MCL	14	Medium Slate Blue 2	5	BCHE	Butyrylcholinesterase; Cholinesterase; Esterase with broad substrate specificity. Contributes to the inactivation of the neurotransmitter acetylcholine. Can degrade neurotoxic organophosphate esters; Belongs to the type-B carboxylesterase/lipase family
MCL	14	Medium Slate Blue 2	5	CYP27A1	Sterol 26-hydroxylase, mitochondrial; Catalyzes the first step in the oxidation of the side chain of sterol intermediates; the 27-hydroxylation of 5-beta- cholestane-3-alpha,7-alpha,12-alpha-triol. Has also a vitamin D3- 25-hydroxylase activity; Belongs to the cytochrome P450 family
MCL	14	Medium Slate Blue 2	5	DHCR7	7-dehydrocholesterol reductase; Production of cholesterol by reduction of C7-C8 double bond of 7-dehydrocholesterol (7-DHC); Belongs to the ERG4/ERG24 family
MCL	14	Medium Slate Blue 2	5	MVK	Mevalonate kinase; May be a regulatory site in cholesterol biosynthetic pathway; Belongs to the GHMP kinase family. Mevalonate kinase subfamily
MCL	15	Medium Slate Blue	5	EXOSC8	Exosome complex component RRP43; Non-catalytic component of the RNA exosome complex which has 3'->5' exoribonuclease activity and participates in a multitude of cellular RNA processing and degradation events. In the nucleus, the RNA exosome complex is involved in proper maturation of stable RNA species such as rRNA, snRNA and snoRNA, in the elimination of RNA processing by-products and non-coding…
MCL	15	Medium Slate Blue	5	HAX1	HCLS1-associated protein X-1; Recruits the Arp2/3 complex to the cell cortex and regulates reorganization of the cortical actin cytoskeleton via its interaction with KCNC3 and the Arp2/3 complex. Slows down the rate of inactivation of KCNC3 channels. Promotes GNA13-mediated cell migration. Involved in the clathrin-mediated endocytosis pathway. May be involved in internalization of ABC transporter…
MCL	15	Medium Slate Blue	5	SBDS	Ribosome maturation protein SBDS; Required for the assembly of mature ribosomes and ribosome biogenesis. Together with EFL1, triggers the GTP- dependent release of EIF6 from 60S pre-ribosomes in the cytoplasm, thereby activating ribosomes for translation competence by allowing 80S ribosome assembly and facilitating EIF6 recycling to the nucleus, where it is required for 60S rRNA processing and nu…
MCL	15	Medium Slate Blue	5	VPS13B	Vacuolar protein sorting-associated protein 13B; May be involved in protein sorting in post Golgi membrane traffic; Belongs to the VPS13 family
MCL	15	Medium Slate Blue	5	ZNF462	Zinc finger protein 462; May be involved in transcriptional regulation; Zinc fingers C2H2-type
MCL	16	Medium Purple	4	GHR	Growth hormone receptor; Receptor for pituitary gland growth hormone involved in regulating postnatal body growth. On ligand binding, couples to the JAK2/STAT5 pathway (By similarity); Belongs to the type I cytokine receptor family. Type 1 subfamily
MCL	16	Medium Purple	4	POU1F1	Pituitary-specific positive transcription factor 1; Transcription factor involved in the specification of the lactotrope, somatotrope, and thyrotrope phenotypes in the developing anterior pituitary. Specifically binds to the consensus sequence 5'-TAAAT-3'. Activates growth hormone and prolactin genes; Belongs to the POU transcription factor family. Class- 1 subfamily
MCL	16	Medium Purple	4	PROKR2	Prokineticin receptor 2; Receptor for prokineticin 2. Exclusively coupled to the G(q) subclass of heteromeric G proteins. Activation leads to mobilization of calcium, stimulation of phosphoinositide turnover and activation of p44/p42 mitogen-activated protein kinase
MCL	16	Medium Purple	4	PROP1	Homeobox protein prophet of Pit-1; Possibly involved in the ontogenesis of pituitary gonadotropes, as well as somatotropes, lactotropes and caudomedial thyrotropes; PRD class homeoboxes and pseudogenes
MCL	17	Medium Purple 2	4	CC2D1A	Coiled-coil and C2 domain-containing protein 1A; Transcription factor that binds specifically to the DRE (dual repressor element) and represses HTR1A gene transcription in neuronal cells. The combination of calcium and ATP specifically inactivates the binding with FRE. May play a role in the altered regulation of HTR1A associated with anxiety and major depression. Mediates HDAC-independent repres…
MCL	17	Medium Purple 2	4	RAB11B	Ras-related protein Rab-11B; The small GTPases Rab are key regulators of intracellular membrane trafficking, from the formation of transport vesicles to their fusion with membranes. Rabs cycle between an inactive GDP-bound form and an active GTP-bound form that is able to recruit to membranes different set of downstream effectors directly responsible for vesicle formation, movement, tethering and…
MCL	17	Medium Purple 2	4	TRAPPC6B	Trafficking protein particle complex subunit 6B; May play a role in vesicular transport from endoplasmic reticulum to Golgi; Trafficking protein particle complex
MCL	17	Medium Purple 2	4	TRAPPC9	Trafficking protein particle complex subunit 9; Functions as an activator of NF-kappa-B through increased phosphorylation of the IKK complex. May function in neuronal cells differentiation. May play a role in vesicular transport from endoplasmic reticulum to Golgi; Belongs to the NIBP family
MCL	18	Orchid 2	3	AIMP2	Aminoacyl tRNA synthase complex-interacting multifunctional protein 2; Required for assembly and stability of the aminoacyl- tRNA synthase complex. Mediates ubiquitination and degradation of FUBP1, a transcriptional activator of MYC, leading to MYC down-regulation which is required for aveolar type II cell differentiation. Blocks MDM2-mediated ubiquitination and degradation of p53/TP53. Functions…
MCL	18	Orchid 2	3	NARS	Asparagine--tRNA ligase, cytoplasmic; Aminoacyl tRNA synthetases, Class II
MCL	18	Orchid 2	3	PARK2	E3 ubiquitin-protein ligase parkin; Functions within a multiprotein E3 ubiquitin ligase complex, catalyzing the covalent attachment of ubiquitin moieties onto substrate proteins, such as BCL2, SYT11, CCNE1, GPR37, RHOT1/MIRO1, MFN1, MFN2, STUB1, SNCAIP, SEPT5, TOMM20, USP30, ZNF746 and AIMP2. Mediates monoubiquitination as well as 'Lys-6', 'Lys-11', 'Lys-48'-linked and 'Lys-63'-linked polyubiquit…
MCL	19	Purple	3	GATM	Glycine amidinotransferase, mitochondrial; Catalyzes the biosynthesis of guanidinoacetate, the immediate precursor of creatine. Creatine plays a vital role in energy metabolism in muscle tissues. May play a role in embryonic and central nervous system development. May be involved in the response to heart failure by elevating local creatine synthesis; Belongs to the amidinotransferase family
MCL	19	Purple	3	SPATA5	Spermatogenesis-associated protein 5; May be involved in morphological and functional mitochondrial transformations during spermatogenesis; Belongs to the AAA ATPase family. AFG2 subfamily
MCL	19	Purple	3	SPATA5L1	Spermatogenesis-associated protein 5-like protein 1; Spermatogenesis associated 5 like 1; Belongs to the AAA ATPase family. AFG2 subfamily
MCL	20	Orchid	3	SLC36A2	Proton-coupled amino acid transporter 2; Involved in a pH-dependent electrogenic neuronal transport and sequestration of small amino acids. Transports glycine and proline. Inhibited by sarcosine (By similarity); Belongs to the amino acid/polyamine transporter 2 family
MCL	20	Orchid	3	SLC3A1	Neutral and basic amino acid transport protein rBAT; Involved in the high-affinity, sodium-independent transport of cystine and neutral and dibasic amino acids (system B(0,+)-like activity). May function as an activator of SLC7A9 and be involved in the high-affinity reabsorption of cystine in the kidney tubule; Solute carriers
MCL	20	Orchid	3	SLC6A19	Sodium-dependent neutral amino acid transporter B(0)AT1; Transporter that mediates resorption of neutral amino acids across the apical membrane of renal and intestinal epithelial cells. This uptake is sodium-dependent and chloride- independent; Belongs to the sodium:neurotransmitter symporter (SNF) (TC 2.A.22) family. SLC6A19 subfamily
MCL	21	Hot Pink	2	PIEZO1	Piezo-type mechanosensitive ion channel component 1; Pore-forming subunit of a mechanosensitive non-specific cation channel. Generates currents characterized by a linear current-voltage relationship that are sensitive to ruthenium red and gadolinium. Plays a key role in epithelial cell adhesion by maintaining integrin activation through R-Ras recruitment to the ER, most probably in its activated …
MCL	21	Hot Pink	2	TRPM1	Transient receptor potential cation channel subfamily M member 1; Cation channel essential for the depolarizing photoresponse of retinal ON bipolar cells. It is part of the GRM6 signaling cascade. May play a role in metastasis suppression (By similarity). May act as a spontaneously active, calcium-permeable plasma membrane channel; Belongs to the transient receptor (TC 1.A.4) family. LTrpC subfam…
MCL	22	Pink	2	ALOXE3	Hydroperoxy icosatetraenoate dehydratase/isomerase; Hydroperoxide isomerase ALOXE3; Non-heme iron-containing lipoxygenase which is atypical in that it displays a prominent hydroperoxide isomerase activity and a reduced dioxygenase activity compared to other lipoxygenases. The hydroperoxide isomerase activity catalyzes the isomerization of hydroperoxides, derived from arachidonic and linoleic acid…
MCL	22	Pink	2	HES7	Transcription factor HES-7; Transcriptional repressor. Represses transcription from both N box- and E box-containing promoters. May with HES1, cooperatively regulate somite formation in the presomitic mesoderm (PSM). May function as a segmentation clock, which is essential for coordinated somite segmentation (By similarity); Basic helix-loop-helix proteins
MCL	23	Light Coral	2	KRT81	Keratin, type II cuticular Hb1; Keratins, type II
MCL	23	Light Coral	2	KRT86	Keratin, type II cuticular Hb6; Keratins, type II

## Sheet: Enrichment subnetwork1
#category	term ID	term description	observed gene count	background gene count	strength	false discovery rate	matching proteins in your network (labels)
GO Biological Process
GO Process	GO:0006259	DNA metabolic process	26	750	2023-05-01	9.32e-17	FANCE,BRIP1,HERC2,EP300,NBN,TINF2,POLG,ATM,TERT,FANCI,WRAP53,MRE11A,FANCF,ATR,BLM,DNA2,VCP,ATRX,FANCG,BRCA2,FANCA,ERCC2,CDC45,EHMT1,BRCA1,RECQL4
GO Process	GO:0006281	DNA repair	23	522	1.15	9.32e-17	FANCE,BRIP1,HERC2,EP300,NBN,POLG,ATM,FANCI,WRAP53,MRE11A,FANCF,ATR,BLM,DNA2,VCP,ATRX,FANCG,BRCA2,FANCA,ERCC2,CDC45,BRCA1,RECQL4
GO Process	GO:0006974	Cellular response to dna damage stimulus	24	793	0.99	3.11e-14	FANCE,BRIP1,HERC2,EP300,NBN,POLG,ATM,FANCI,WRAP53,MRE11A,FANCF,ATR,BLM,DNA2,VCP,ATRX,FANCG,BRCA2,FANCA,ERCC2,CHD2,CDC45,BRCA1,RECQL4
GO Process	GO:0090304	Nucleic acid metabolic process	32	2178	0.67	9.40e-12	FANCE,BRIP1,HERC2,EP300,NBN,TINF2,POLG,ATM,MITF,TERT,FANCI,WRAP53,MRE11A,FANCF,ATR,BLM,DNA2,VCP,PTEN,ATRX,AR,FANCG,BRCA2,PDX1,FANCA,ERCC2,ELP4,PAX6,CDC45,EHMT1,BRCA1,RECQL4
GO Process	GO:0051276	Chromosome organization	24	1066	0.86	1.23e-11	H3F3B,BRIP1,EP300,NBN,TINF2,ATM,BUB1B,TERT,WRAP53,MRE11A,RERE,ATR,ARID1B,BLM,DNA2,ATRX,KDM2B,BRCA2,BRPF1,ERCC2,CHD2,SATB1,EHMT1,RECQL4
GO Process	GO:0032200	Telomere organization	12	125	1.49	2.28e-11	H3F3B,NBN,TINF2,ATM,TERT,WRAP53,MRE11A,ATR,BLM,DNA2,BRCA2,RECQL4
GO Process	GO:0031326	Regulation of cellular biosynthetic process	40	4125	0.49	1.59e-10	EEF1A2,PHOX2B,UBE3A,BMP4,H3F3B,BRIP1,EP300,NBN,TINF2,ATM,MITF,TERT,WRAP53,GATA4,RERE,FOXG1,ATR,ARID1B,BLM,DNA2,VCP,PTEN,ATRX,AR,ZIC2,KDM2B,BRCA2,PDX1,BRPF1,FANCA,ERCC2,CHD2,ELP4,SATB1,PAX6,CDC45,GDNF,EHMT1,BRCA1,WWOX
GO Process	GO:2000112	Regulation of cellular macromolecule biosynthetic process	39	3878	0.51	1.59e-10	EEF1A2,PHOX2B,UBE3A,BMP4,H3F3B,BRIP1,EP300,NBN,TINF2,ATM,MITF,TERT,WRAP53,GATA4,RERE,FOXG1,ATR,ARID1B,BLM,DNA2,PTEN,ATRX,AR,ZIC2,KDM2B,BRCA2,PDX1,BRPF1,FANCA,ERCC2,CHD2,ELP4,SATB1,PAX6,CDC45,GDNF,EHMT1,BRCA1,WWOX
GO Process	GO:0000723	Telomere maintenance	11	112	2023-05-01	1.60e-10	NBN,TINF2,ATM,TERT,WRAP53,MRE11A,ATR,BLM,DNA2,BRCA2,RECQL4
GO Process	GO:0006260	DNA replication	13	205	1.31	1.60e-10	BRIP1,NBN,POLG,ATM,MRE11A,ATR,BLM,DNA2,ATRX,BRCA2,CDC45,BRCA1,RECQL4
GO Process	GO:0019219	Regulation of nucleobase-containing compound metabolic process	39	3982	0.5	2.33e-10	PHOX2B,UBE3A,BMP4,H3F3B,BRIP1,EP300,NBN,TINF2,ATM,MITF,TERT,WRAP53,MRE11A,GATA4,RERE,FOXG1,ATR,ARID1B,BLM,VCP,PTEN,ATRX,AR,ZIC2,KDM2B,BRCA2,PDX1,BRPF1,FANCA,ERCC2,CHD2,ELP4,SATB1,PAX6,CDC45,GDNF,EHMT1,BRCA1,WWOX
GO Process	GO:0044260	Cellular macromolecule metabolic process	43	4976	0.44	2.33e-10	EEF1A2,FANCE,UBE3A,BMP4,H3F3B,BRIP1,HERC2,EP300,NBN,TINF2,POLG,ATM,BUB1B,MITF,TERT,FANCI,WRAP53,OXTR,MRE11A,FANCF,B3GALTL,ATR,BLM,DNA2,VCP,PTEN,ATRX,AR,KDM2B,FANCG,BRCA2,PDX1,BRPF1,FANCA,ERCC2,ELP4,SATB1,PAX6,CDC45,GDNF,EHMT1,BRCA1,RECQL4
GO Process	GO:0033554	Cellular response to stress	27	1725	0.7	2.58e-10	FANCE,BRIP1,HERC2,PRDX1,EP300,NBN,POLG,ATM,TERT,FANCI,WRAP53,MRE11A,FANCF,ATR,BLM,DNA2,VCP,PTEN,ATRX,FANCG,BRCA2,FANCA,ERCC2,CHD2,CDC45,BRCA1,RECQL4
GO Process	GO:0051726	Regulation of cell cycle	23	1230	0.78	7.34e-10	TSC2,PHOX2B,BMP4,BRIP1,EP300,NBN,ATM,BUB1B,TERT,MRE11A,EDN3,FOXG1,ATR,BLM,DNA2,ASPM,PTEN,ATRX,BRCA2,ERCC2,CDC45,EHMT1,BRCA1
GO Process	GO:0006725	Cellular aromatic compound metabolic process	33	2882	0.56	7.37e-10	FANCE,BRIP1,HERC2,EP300,NBN,TINF2,POLG,ATM,MITF,TERT,FANCI,WRAP53,MRE11A,FANCF,ATR,OCA2,BLM,DNA2,VCP,PTEN,ATRX,AR,FANCG,BRCA2,PDX1,FANCA,ERCC2,ELP4,PAX6,CDC45,EHMT1,BRCA1,RECQL4
GO Process	GO:0006302	Double-strand break repair	12	204	1.28	1.70e-09	BRIP1,HERC2,NBN,ATM,MRE11A,BLM,DNA2,VCP,BRCA2,CDC45,BRCA1,RECQL4
GO Process	GO:0034645	Cellular macromolecule biosynthetic process	25	1592	0.7	2.02e-09	EEF1A2,BRIP1,NBN,POLG,ATM,MITF,TERT,WRAP53,MRE11A,B3GALTL,ATR,BLM,DNA2,VCP,PTEN,ATRX,AR,BRCA2,PDX1,ERCC2,ELP4,PAX6,CDC45,BRCA1,RECQL4
GO Process	GO:0000729	DNA double-strand break processing	7	23	1.99	2.31e-09	BRIP1,NBN,ATM,MRE11A,BLM,DNA2,BRCA1
GO Process	GO:0045935	Positive regulation of nucleobase-containing compound metabolic process	27	1927	0.65	2.36e-09	PHOX2B,UBE3A,BMP4,EP300,NBN,ATM,MITF,TERT,WRAP53,MRE11A,GATA4,RERE,ATR,ARID1B,BLM,VCP,ATRX,AR,ZIC2,BRCA2,PDX1,BRPF1,ERCC2,PAX6,GDNF,BRCA1,WWOX
GO Process	GO:0006996	Organelle organization	35	3450	0.51	2.41e-09	H3F3B,BRIP1,EP300,NBN,TINF2,ATM,BUB1B,TERT,TUBB3,WRAP53,MRE11A,RERE,ATR,ARID1B,BLM,DNA2,VCP,ASPM,PTEN,ATRX,KDM2B,FANCG,BRCA2,TUBB2A,BRPF1,FANCA,ERCC2,CHD2,KIF5C,SATB1,PAX6,EHMT1,BRCA1,TBCE,RECQL4
GO Process	GO:0006950	Response to stress	35	3485	0.51	2.99e-09	FANCE,UBE3A,H3F3B,BRIP1,HERC2,PRDX1,EP300,NBN,POLG,ATM,TERT,FANCI,WRAP53,OXTR,MRE11A,FANCF,GATA4,ATR,ARID1B,BLM,DNA2,VCP,PTEN,ATRX,FANCG,BRCA2,PDX1,FANCA,ERCC2,CHD2,PRF1,PAX6,CDC45,BRCA1,RECQL4
GO Process	GO:1901360	Organic cyclic compound metabolic process	33	3118	0.53	4.44e-09	FANCE,BRIP1,HERC2,EP300,NBN,TINF2,POLG,ATM,MITF,TERT,FANCI,WRAP53,MRE11A,FANCF,ATR,OCA2,BLM,DNA2,VCP,PTEN,ATRX,AR,FANCG,BRCA2,PDX1,FANCA,ERCC2,ELP4,PAX6,CDC45,EHMT1,BRCA1,RECQL4
GO Process	GO:0051171	Regulation of nitrogen compound metabolic process	44	5836	0.38	5.90e-09	EEF1A2,TSC2,PHOX2B,UBE3A,BMP4,H3F3B,BRIP1,PRDX1,EP300,NBN,TINF2,ATM,MITF,TERT,FANCI,WRAP53,MRE11A,GATA4,EDN3,RERE,FOXG1,ATR,ARID1B,BLM,VCP,PTEN,ATRX,AR,ZIC2,KDM2B,BRCA2,PDX1,BRPF1,FANCA,ERCC2,CHD2,ELP4,SATB1,PAX6,CDC45,GDNF,EHMT1,BRCA1,WWOX
GO Process	GO:1901796	Regulation of signal transduction by p53 class mediator	11	182	1.29	7.54e-09	BRIP1,EP300,NBN,ATM,MRE11A,ATR,BLM,DNA2,BRPF1,EHMT1,BRCA1
GO Process	GO:0045786	Negative regulation of cell cycle	16	571	0.95	8.36e-09	PHOX2B,BMP4,BRIP1,EP300,NBN,ATM,BUB1B,MRE11A,ATR,BLM,DNA2,PTEN,ATRX,CDC45,EHMT1,BRCA1
GO Process	GO:0007346	Regulation of mitotic cell cycle	17	676	0.91	8.85e-09	PHOX2B,BMP4,EP300,NBN,ATM,BUB1B,TERT,MRE11A,EDN3,FOXG1,BLM,PTEN,ATRX,BRCA2,ERCC2,CDC45,BRCA1
GO Process	GO:0031323	Regulation of cellular metabolic process	45	6239	0.36	1.04e-08	EEF1A2,TSC2,PHOX2B,UBE3A,BMP4,H3F3B,BRIP1,PRDX1,EP300,NBN,TINF2,ATM,MITF,TERT,FANCI,WRAP53,MRE11A,GATA4,EDN3,RERE,FOXG1,ATR,ARID1B,BLM,DNA2,VCP,PTEN,ATRX,AR,ZIC2,KDM2B,BRCA2,PDX1,BRPF1,FANCA,ERCC2,CHD2,ELP4,SATB1,PAX6,CDC45,GDNF,EHMT1,BRCA1,WWOX
GO Process	GO:0034641	Cellular nitrogen compound metabolic process	33	3282	0.51	1.49e-08	EEF1A2,FANCE,BRIP1,HERC2,EP300,NBN,TINF2,POLG,ATM,MITF,TERT,FANCI,WRAP53,MRE11A,FANCF,ATR,BLM,DNA2,VCP,PTEN,ATRX,AR,FANCG,BRCA2,PDX1,FANCA,ERCC2,ELP4,PAX6,CDC45,EHMT1,BRCA1,RECQL4
GO Process	GO:0000075	Cell cycle checkpoint	11	198	1.25	1.52e-08	BRIP1,EP300,NBN,ATM,BUB1B,MRE11A,ATR,BLM,DNA2,CDC45,BRCA1
GO Process	GO:0080090	Regulation of primary metabolic process	44	6032	0.37	1.59e-08	EEF1A2,TSC2,PHOX2B,UBE3A,BMP4,H3F3B,BRIP1,PRDX1,EP300,NBN,TINF2,ATM,MITF,TERT,FANCI,WRAP53,MRE11A,GATA4,EDN3,RERE,FOXG1,ATR,ARID1B,BLM,VCP,PTEN,ATRX,AR,ZIC2,KDM2B,BRCA2,PDX1,BRPF1,FANCA,ERCC2,CHD2,ELP4,SATB1,PAX6,CDC45,GDNF,EHMT1,BRCA1,WWOX
GO Process	GO:0070198	Protein localization to chromosome, telomeric region	6	16	2023-08-02	1.79e-08	TINF2,ATM,TERT,ATR,ATRX,BRCA2
GO Process	GO:0008406	Gonad development	11	205	1.24	1.99e-08	UBE3A,H3F3B,BRIP1,ATM,GATA4,ASPM,ATRX,AR,FANCG,BRCA2,FANCA
GO Process	GO:0031570	DNA integrity checkpoint	10	151	1.33	2.22e-08	BRIP1,EP300,NBN,ATM,MRE11A,ATR,BLM,DNA2,CDC45,BRCA1
GO Process	GO:0031328	Positive regulation of cellular biosynthetic process	26	2005	0.62	2.26e-08	PHOX2B,UBE3A,BMP4,EP300,ATM,MITF,TERT,WRAP53,GATA4,RERE,ATR,ARID1B,BLM,DNA2,VCP,ATRX,AR,ZIC2,BRCA2,PDX1,BRPF1,ERCC2,PAX6,GDNF,BRCA1,WWOX
GO Process	GO:0060255	Regulation of macromolecule metabolic process	45	6407	0.35	2.26e-08	EEF1A2,TSC2,PHOX2B,UBE3A,BMP4,H3F3B,BRIP1,PRDX1,EP300,NBN,TINF2,ATM,MITF,TERT,FANCI,WRAP53,MRE11A,GATA4,EDN3,RERE,FOXG1,ATR,ARID1B,BLM,DNA2,VCP,PTEN,ATRX,AR,ZIC2,KDM2B,BRCA2,PDX1,BRPF1,FANCA,ERCC2,CHD2,ELP4,SATB1,PAX6,CDC45,GDNF,EHMT1,BRCA1,WWOX
GO Process	GO:0007275	Multicellular organism development	40	5023	0.41	2.36e-08	TSC2,PHOX2B,UBE3A,BMP4,H3F3B,BRIP1,PRDX1,EP300,NBN,ATM,MITF,TERT,TUBB3,OXTR,GATA4,EDN3,RERE,FOXG1,ATR,ARID1B,ASPM,PTEN,ATRX,AR,ZIC2,KDM2B,FANCG,BRCA2,TUBB2A,PDX1,FANCA,ERCC2,CHD2,KIF5C,SATB1,PAX6,GDNF,BRCA1,WWOX,RECQL4
GO Process	GO:0032502	Developmental process	43	5841	0.37	2.36e-08	TSC2,PHOX2B,UBE3A,BMP4,H3F3B,BRIP1,HERC2,PRDX1,EP300,NBN,POLG,ATM,MITF,TERT,TUBB3,OXTR,GATA4,EDN3,RERE,FOXG1,ATR,ARID1B,OCA2,ASPM,PTEN,ATRX,AR,ZIC2,KDM2B,FANCG,BRCA2,TUBB2A,PDX1,FANCA,ERCC2,CHD2,KIF5C,SATB1,PAX6,GDNF,BRCA1,WWOX,RECQL4
GO Process	GO:0032508	DNA duplex unwinding	9	106	1.44	2.36e-08	BRIP1,NBN,MRE11A,BLM,DNA2,ATRX,ERCC2,CHD2,RECQL4
GO Process	GO:0006355	Regulation of transcription, dna-templated	33	3388	0.49	2.61e-08	PHOX2B,UBE3A,BMP4,H3F3B,BRIP1,EP300,ATM,MITF,TERT,GATA4,RERE,FOXG1,ARID1B,BLM,PTEN,ATRX,AR,ZIC2,KDM2B,BRCA2,PDX1,BRPF1,FANCA,ERCC2,CHD2,ELP4,SATB1,PAX6,CDC45,GDNF,EHMT1,BRCA1,WWOX
GO Process	GO:0031325	Positive regulation of cellular metabolic process	33	3413	0.49	3.05e-08	EEF1A2,TSC2,PHOX2B,UBE3A,BMP4,EP300,NBN,ATM,MITF,TERT,FANCI,WRAP53,MRE11A,GATA4,EDN3,RERE,ATR,ARID1B,BLM,DNA2,VCP,PTEN,ATRX,AR,ZIC2,BRCA2,PDX1,BRPF1,ERCC2,PAX6,GDNF,BRCA1,WWOX
GO Process	GO:0010564	Regulation of cell cycle process	17	760	0.86	3.40e-08	PHOX2B,BMP4,EP300,NBN,ATM,BUB1B,TERT,MRE11A,EDN3,BLM,PTEN,ATRX,BRCA2,ERCC2,CDC45,EHMT1,BRCA1
GO Process	GO:0009893	Positive regulation of metabolic process	35	3893	0.46	3.79e-08	EEF1A2,TSC2,PHOX2B,UBE3A,BMP4,EP300,NBN,ATM,MITF,TERT,FANCI,WRAP53,OXTR,MRE11A,GATA4,EDN3,RERE,ATR,ARID1B,BLM,DNA2,VCP,PTEN,ATRX,AR,ZIC2,BRCA2,PDX1,BRPF1,ERCC2,PAX6,GDNF,EHMT1,BRCA1,WWOX
GO Process	GO:0010557	Positive regulation of macromolecule biosynthetic process	25	1906	0.62	3.79e-08	PHOX2B,UBE3A,BMP4,EP300,ATM,MITF,TERT,WRAP53,GATA4,RERE,ATR,ARID1B,BLM,DNA2,ATRX,AR,ZIC2,BRCA2,PDX1,BRPF1,ERCC2,PAX6,GDNF,BRCA1,WWOX
GO Process	GO:0048856	Anatomical structure development	41	5402	0.39	3.79e-08	TSC2,PHOX2B,UBE3A,BMP4,H3F3B,BRIP1,PRDX1,EP300,NBN,ATM,MITF,TERT,TUBB3,OXTR,GATA4,EDN3,RERE,FOXG1,ATR,ARID1B,OCA2,ASPM,PTEN,ATRX,AR,ZIC2,KDM2B,FANCG,BRCA2,TUBB2A,PDX1,FANCA,ERCC2,CHD2,KIF5C,SATB1,PAX6,GDNF,BRCA1,WWOX,RECQL4
GO Process	GO:0016043	Cellular component organization	41	5447	0.38	4.79e-08	PHOX2B,H3F3B,BRIP1,EP300,NBN,TINF2,ATM,BUB1B,MITF,TERT,TUBB3,WRAP53,MRE11A,RERE,FOXG1,ATR,ARID1B,BLM,DNA2,VCP,ASPM,PTEN,ATRX,KDM2B,FANCG,BRCA2,TUBB2A,BRPF1,FANCA,ERCC2,CHD2,KIF5C,PRF1,SATB1,PAX6,CDC45,GDNF,EHMT1,BRCA1,TBCE,RECQL4
GO Process	GO:0048731	System development	37	4426	0.43	5.03e-08	TSC2,PHOX2B,UBE3A,BMP4,H3F3B,BRIP1,PRDX1,EP300,NBN,ATM,MITF,TERT,TUBB3,OXTR,GATA4,EDN3,RERE,FOXG1,ARID1B,ASPM,PTEN,ATRX,AR,ZIC2,KDM2B,FANCG,BRCA2,TUBB2A,PDX1,FANCA,ERCC2,CHD2,KIF5C,SATB1,PAX6,GDNF,WWOX
GO Process	GO:0048589	Developmental growth	13	389	2023-03-01	5.59e-08	UBE3A,BMP4,H3F3B,EP300,NBN,ATM,GATA4,ASPM,PTEN,ATRX,AR,BRCA2,ERCC2
GO Process	GO:0019222	Regulation of metabolic process	46	6948	0.33	5.82e-08	EEF1A2,TSC2,PHOX2B,UBE3A,BMP4,H3F3B,BRIP1,PRDX1,EP300,NBN,TINF2,ATM,MITF,TERT,FANCI,WRAP53,OXTR,MRE11A,GATA4,EDN3,RERE,FOXG1,ATR,ARID1B,BLM,DNA2,VCP,PTEN,ATRX,AR,ZIC2,KDM2B,BRCA2,PDX1,BRPF1,FANCA,ERCC2,CHD2,ELP4,SATB1,PAX6,CDC45,GDNF,EHMT1,BRCA1,WWOX
GO Process	GO:0048468	Cell development	23	1629	0.66	5.82e-08	PHOX2B,BMP4,H3F3B,BRIP1,EP300,ATM,TUBB3,GATA4,EDN3,RERE,FOXG1,ARID1B,OCA2,ASPM,PTEN,ATRX,AR,FANCG,BRCA2,ERCC2,KIF5C,PAX6,GDNF
GO Process	GO:0050896	Response to stimulus	49	8046	0.29	9.81e-08	EEF1A2,TSC2,PHOX2B,FANCE,UBE3A,BMP4,H3F3B,BRIP1,HERC2,PRDX1,EP300,NBN,POLG,ATM,MITF,TERT,FANCI,TUBB3,WRAP53,OXTR,MRE11A,FANCF,GATA4,EDN3,FOXG1,ATR,ARID1B,BLM,DNA2,VCP,PTEN,ATRX,AR,FANCG,BRCA2,PDX1,FANCA,ERCC2,CHD2,KIF5C,PRF1,SATB1,PAX6,CDC45,GDNF,EHMT1,BRCA1,WWOX,RECQL4
GO Process	GO:0010948	Negative regulation of cell cycle process	12	328	2023-07-01	9.99e-08	PHOX2B,BMP4,EP300,NBN,ATM,BUB1B,MRE11A,BLM,PTEN,ATRX,EHMT1,BRCA1
GO Process	GO:0045934	Negative regulation of nucleobase-containing compound metabolic process	22	1528	0.66	1.05e-07	BMP4,H3F3B,EP300,NBN,TINF2,ATM,MITF,TERT,RERE,FOXG1,BLM,ATRX,AR,ZIC2,KDM2B,PDX1,SATB1,PAX6,GDNF,EHMT1,BRCA1,WWOX
GO Process	GO:0048513	Animal organ development	31	3197	0.49	1.18e-07	TSC2,PHOX2B,UBE3A,BMP4,H3F3B,BRIP1,EP300,ATM,MITF,TUBB3,OXTR,GATA4,EDN3,RERE,FOXG1,ASPM,PTEN,ATRX,AR,ZIC2,KDM2B,FANCG,BRCA2,PDX1,FANCA,ERCC2,CHD2,SATB1,PAX6,GDNF,WWOX
GO Process	GO:0048608	Reproductive structure development	13	420	1.0	1.20e-07	UBE3A,BMP4,H3F3B,BRIP1,ATM,GATA4,ASPM,PTEN,ATRX,AR,FANCG,BRCA2,FANCA
GO Process	GO:0048869	Cellular developmental process	33	3757	0.45	2.66e-07	PHOX2B,UBE3A,BMP4,H3F3B,BRIP1,EP300,ATM,MITF,TERT,TUBB3,GATA4,EDN3,RERE,FOXG1,ATR,ARID1B,OCA2,ASPM,PTEN,ATRX,AR,ZIC2,FANCG,BRCA2,TUBB2A,PDX1,ERCC2,CHD2,KIF5C,SATB1,PAX6,GDNF,WWOX
GO Process	GO:0007049	Cell cycle	20	1313	0.69	2.87e-07	BRIP1,EP300,NBN,ATM,BUB1B,FANCI,TUBB3,MRE11A,BLM,DNA2,VCP,ASPM,ATRX,BRCA2,TUBB2A,FANCA,PAX6,CDC45,BRCA1,TBCE
GO Process	GO:0000724	Double-strand break repair via homologous recombination	8	102	2023-04-01	3.05e-07	NBN,ATM,MRE11A,BLM,BRCA2,CDC45,BRCA1,RECQL4
GO Process	GO:0048522	Positive regulation of cellular process	40	5579	0.36	3.86e-07	EEF1A2,TSC2,PHOX2B,UBE3A,BMP4,H3F3B,EP300,NBN,ATM,MITF,TERT,FANCI,WRAP53,OXTR,MRE11A,GATA4,EDN3,RERE,FOXG1,ATR,ARID1B,BLM,DNA2,VCP,ASPM,PTEN,ATRX,AR,ZIC2,KDM2B,BRCA2,PDX1,BRPF1,ERCC2,PRF1,PAX6,CDC45,GDNF,BRCA1,WWOX
GO Process	GO:0006357	Regulation of transcription by rna polymerase ii	25	2172	0.57	3.87e-07	PHOX2B,UBE3A,BMP4,BRIP1,EP300,ATM,MITF,TERT,GATA4,RERE,FOXG1,ARID1B,ATRX,AR,ZIC2,KDM2B,PDX1,CHD2,ELP4,SATB1,PAX6,GDNF,EHMT1,BRCA1,WWOX
GO Process	GO:0060249	Anatomical structure homeostasis	12	380	2023-01-01	4.10e-07	PRDX1,NBN,TINF2,ATM,TERT,WRAP53,MRE11A,ATR,BLM,DNA2,BRCA2,RECQL4
GO Process	GO:1903508	Positive regulation of nucleic acid-templated transcription	22	1670	0.63	4.51e-07	PHOX2B,UBE3A,BMP4,EP300,ATM,MITF,TERT,GATA4,RERE,ARID1B,BLM,ATRX,AR,ZIC2,BRCA2,PDX1,BRPF1,ERCC2,PAX6,GDNF,BRCA1,WWOX
GO Process	GO:0019953	Sexual reproduction	16	810	0.8	4.62e-07	UBE3A,BMP4,H3F3B,BRIP1,HERC2,ATM,OXTR,OCA2,ASPM,PTEN,ATRX,AR,KDM2B,FANCG,BRCA2,FANCA
GO Process	GO:0000278	Mitotic cell cycle	15	695	0.84	4.89e-07	EP300,NBN,ATM,BUB1B,TUBB3,MRE11A,BLM,DNA2,VCP,BRCA2,TUBB2A,PAX6,CDC45,BRCA1,TBCE
GO Process	GO:0051173	Positive regulation of nitrogen compound metabolic process	30	3239	0.47	6.61e-07	PHOX2B,UBE3A,BMP4,EP300,NBN,ATM,MITF,TERT,FANCI,WRAP53,MRE11A,GATA4,EDN3,RERE,ATR,ARID1B,BLM,VCP,PTEN,ATRX,AR,ZIC2,BRCA2,PDX1,BRPF1,ERCC2,PAX6,GDNF,BRCA1,WWOX
GO Process	GO:0031324	Negative regulation of cellular metabolic process	27	2630	0.52	7.08e-07	TSC2,BMP4,H3F3B,EP300,NBN,TINF2,ATM,MITF,TERT,GATA4,RERE,FOXG1,ATR,BLM,PTEN,ATRX,AR,ZIC2,KDM2B,BRCA2,PDX1,SATB1,PAX6,GDNF,EHMT1,BRCA1,WWOX
GO Process	GO:0022414	Reproductive process	20	1400	0.66	7.30e-07	UBE3A,BMP4,H3F3B,BRIP1,HERC2,NBN,ATM,BUB1B,OXTR,MRE11A,GATA4,OCA2,ASPM,PTEN,ATRX,AR,KDM2B,FANCG,BRCA2,FANCA
GO Process	GO:0030154	Cell differentiation	32	3702	0.44	7.38e-07	PHOX2B,UBE3A,BMP4,H3F3B,BRIP1,EP300,ATM,MITF,TERT,TUBB3,GATA4,EDN3,RERE,FOXG1,ARID1B,OCA2,ASPM,PTEN,ATRX,AR,ZIC2,FANCG,BRCA2,TUBB2A,PDX1,ERCC2,CHD2,KIF5C,SATB1,PAX6,GDNF,WWOX
GO Process	GO:0022402	Cell cycle process	17	976	0.75	7.84e-07	BRIP1,EP300,NBN,ATM,BUB1B,MRE11A,BLM,DNA2,VCP,ASPM,ATRX,BRCA2,FANCA,PAX6,CDC45,BRCA1,TBCE
GO Process	GO:0006261	DNA-dependent DNA replication	8	119	1.33	7.94e-07	POLG,MRE11A,BLM,DNA2,ATRX,BRCA2,CDC45,RECQL4
GO Process	GO:0007417	Central nervous system development	17	988	0.74	9.17e-07	PHOX2B,UBE3A,BMP4,ATM,OXTR,RERE,FOXG1,ASPM,PTEN,ATRX,ZIC2,KDM2B,BRCA2,PDX1,ERCC2,PAX6,GDNF
GO Process	GO:0045893	Positive regulation of transcription, dna-templated	21	1587	0.63	9.39e-07	PHOX2B,UBE3A,BMP4,EP300,ATM,MITF,TERT,GATA4,ARID1B,BLM,ATRX,AR,ZIC2,BRCA2,PDX1,BRPF1,ERCC2,PAX6,GDNF,BRCA1,WWOX
GO Process	GO:1901990	Regulation of mitotic cell cycle phase transition	12	416	0.97	9.39e-07	PHOX2B,EP300,NBN,ATM,BUB1B,TERT,MRE11A,BLM,PTEN,ERCC2,CDC45,BRCA1
GO Process	GO:0048518	Positive regulation of biological process	41	6112	0.33	1.24e-06	EEF1A2,TSC2,PHOX2B,UBE3A,BMP4,H3F3B,EP300,NBN,ATM,MITF,TERT,FANCI,WRAP53,OXTR,MRE11A,GATA4,EDN3,RERE,FOXG1,ATR,ARID1B,BLM,DNA2,VCP,ASPM,PTEN,ATRX,AR,ZIC2,KDM2B,BRCA2,PDX1,BRPF1,ERCC2,PRF1,PAX6,CDC45,GDNF,EHMT1,BRCA1,WWOX
GO Process	GO:0010604	Positive regulation of macromolecule metabolic process	31	3600	0.44	1.56e-06	PHOX2B,UBE3A,BMP4,EP300,NBN,ATM,MITF,TERT,FANCI,WRAP53,MRE11A,GATA4,EDN3,RERE,ATR,ARID1B,BLM,DNA2,VCP,PTEN,ATRX,AR,ZIC2,BRCA2,PDX1,BRPF1,ERCC2,PAX6,GDNF,BRCA1,WWOX
GO Process	GO:0010468	Regulation of gene expression	36	4813	0.38	1.65e-06	EEF1A2,PHOX2B,UBE3A,BMP4,H3F3B,BRIP1,EP300,ATM,MITF,TERT,MRE11A,GATA4,EDN3,RERE,FOXG1,ARID1B,BLM,PTEN,ATRX,AR,ZIC2,KDM2B,BRCA2,PDX1,BRPF1,FANCA,ERCC2,CHD2,ELP4,SATB1,PAX6,CDC45,GDNF,EHMT1,BRCA1,WWOX
GO Process	GO:0007399	Nervous system development	25	2371	0.53	1.83e-06	TSC2,PHOX2B,UBE3A,BMP4,EP300,ATM,TERT,TUBB3,OXTR,EDN3,RERE,FOXG1,ARID1B,ASPM,PTEN,ATRX,ZIC2,KDM2B,BRCA2,TUBB2A,PDX1,ERCC2,KIF5C,PAX6,GDNF
GO Process	GO:0051716	Cellular response to stimulus	42	6489	0.32	1.85e-06	TSC2,PHOX2B,FANCE,UBE3A,BMP4,BRIP1,HERC2,PRDX1,EP300,NBN,POLG,ATM,MITF,TERT,FANCI,TUBB3,WRAP53,OXTR,MRE11A,FANCF,GATA4,EDN3,ATR,ARID1B,BLM,DNA2,VCP,PTEN,ATRX,AR,FANCG,BRCA2,PDX1,FANCA,ERCC2,CHD2,PAX6,CDC45,GDNF,BRCA1,WWOX,RECQL4
GO Process	GO:0060322	Head development	15	788	0.79	2.11e-06	PHOX2B,UBE3A,BMP4,EP300,ATM,OXTR,RERE,FOXG1,ASPM,PTEN,ATRX,ZIC2,KDM2B,BRCA2,PAX6
GO Process	GO:0042592	Homeostatic process	21	1676	0.6	2.21e-06	UBE3A,BMP4,PRDX1,NBN,TINF2,POLG,ATM,TERT,WRAP53,OXTR,MRE11A,GATA4,EDN3,ATR,BLM,DNA2,BRCA2,PDX1,ERCC2,PAX6,RECQL4
GO Process	GO:0048523	Negative regulation of cellular process	36	4874	0.37	2.21e-06	TSC2,PHOX2B,UBE3A,BMP4,H3F3B,BRIP1,EP300,NBN,TINF2,ATM,BUB1B,MITF,TERT,MRE11A,GATA4,RERE,FOXG1,ATR,BLM,DNA2,VCP,ASPM,PTEN,ATRX,AR,ZIC2,KDM2B,BRCA2,PDX1,SATB1,PAX6,CDC45,GDNF,EHMT1,BRCA1,WWOX
GO Process	GO:0000077	DNA damage checkpoint	8	140	1.26	2.29e-06	BRIP1,EP300,NBN,ATM,MRE11A,ATR,BLM,BRCA1
GO Process	GO:0006807	Nitrogen compound metabolic process	43	6852	0.3	2.39e-06	EEF1A2,FANCE,UBE3A,BMP4,H3F3B,BRIP1,HERC2,EP300,NBN,TINF2,POLG,ATM,BUB1B,MITF,TERT,FANCI,WRAP53,OXTR,MRE11A,FANCF,B3GALTL,ATR,BLM,DNA2,VCP,PTEN,ATRX,AR,KDM2B,FANCG,BRCA2,PDX1,BRPF1,FANCA,ERCC2,ELP4,SATB1,PAX6,CDC45,GDNF,EHMT1,BRCA1,RECQL4
GO Process	GO:0044249	Cellular biosynthetic process	26	2611	0.5	2.43e-06	EEF1A2,BRIP1,NBN,POLG,ATM,MITF,TERT,WRAP53,MRE11A,B3GALTL,ATR,OCA2,BLM,DNA2,VCP,PTEN,ATRX,AR,BRCA2,PDX1,ERCC2,ELP4,PAX6,CDC45,BRCA1,RECQL4
GO Process	GO:0010558	Negative regulation of macromolecule biosynthetic process	20	1534	0.62	2.69e-06	BMP4,H3F3B,EP300,TINF2,MITF,RERE,FOXG1,ATR,BLM,ATRX,AR,ZIC2,KDM2B,BRCA2,PDX1,SATB1,PAX6,EHMT1,BRCA1,WWOX
GO Process	GO:0048609	Multicellular organismal reproductive process	15	807	0.78	2.69e-06	BMP4,H3F3B,BRIP1,HERC2,ATM,OXTR,OCA2,ASPM,PTEN,ATRX,AR,KDM2B,FANCG,BRCA2,FANCA
GO Process	GO:0044237	Cellular metabolic process	45	7513	0.28	2.76e-06	EEF1A2,FANCE,UBE3A,BMP4,H3F3B,BRIP1,HERC2,PRDX1,EP300,NBN,TINF2,POLG,ATM,BUB1B,MITF,TERT,FANCI,WRAP53,OXTR,MRE11A,FANCF,B3GALTL,ATR,OCA2,BLM,DNA2,VCP,PTEN,ATRX,AR,KDM2B,FANCG,BRCA2,PDX1,BRPF1,FANCA,ERCC2,ELP4,SATB1,PAX6,CDC45,GDNF,EHMT1,BRCA1,RECQL4
GO Process	GO:0003006	Developmental process involved in reproduction	16	945	0.73	2.91e-06	UBE3A,BMP4,H3F3B,BRIP1,HERC2,ATM,GATA4,OCA2,ASPM,PTEN,ATRX,AR,KDM2B,FANCG,BRCA2,FANCA
GO Process	GO:0070200	Establishment of protein localization to telomere	4	7	2.26	3.20e-06	ATM,TERT,ATR,BRCA2
GO Process	GO:0010605	Negative regulation of macromolecule metabolic process	27	2875	0.48	3.62e-06	TSC2,BMP4,H3F3B,BRIP1,EP300,NBN,TINF2,ATM,MITF,TERT,RERE,FOXG1,ATR,BLM,PTEN,ATRX,AR,ZIC2,KDM2B,BRCA2,PDX1,SATB1,PAX6,GDNF,EHMT1,BRCA1,WWOX
GO Process	GO:0006310	DNA recombination	9	219	2023-12-01	3.87e-06	BRIP1,NBN,ATM,MRE11A,BLM,BRCA2,CDC45,BRCA1,RECQL4
GO Process	GO:0051321	Meiotic cell cycle	9	220	2023-12-01	3.99e-06	BRIP1,NBN,ATM,BUB1B,MRE11A,ASPM,ATRX,BRCA2,FANCA
GO Process	GO:0036297	Interstrand cross-link repair	6	56	1.54	4.20e-06	FANCE,FANCI,FANCF,ATR,FANCG,FANCA
GO Process	GO:0009892	Negative regulation of metabolic process	28	3124	0.46	4.51e-06	TSC2,BMP4,H3F3B,BRIP1,EP300,NBN,TINF2,ATM,MITF,TERT,GATA4,RERE,FOXG1,ATR,BLM,PTEN,ATRX,AR,ZIC2,KDM2B,BRCA2,PDX1,SATB1,PAX6,GDNF,EHMT1,BRCA1,WWOX
GO Process	GO:0031327	Negative regulation of cellular biosynthetic process	20	1592	0.61	4.51e-06	BMP4,H3F3B,EP300,TINF2,MITF,RERE,FOXG1,ATR,BLM,ATRX,AR,ZIC2,KDM2B,BRCA2,PDX1,SATB1,PAX6,EHMT1,BRCA1,WWOX
GO Process	GO:0045930	Negative regulation of mitotic cell cycle	10	308	2023-02-01	5.12e-06	BMP4,EP300,NBN,ATM,BUB1B,MRE11A,BLM,PTEN,ATRX,BRCA1
GO Process	GO:1901576	Organic substance biosynthetic process	26	2734	0.48	5.49e-06	EEF1A2,BRIP1,NBN,POLG,ATM,MITF,TERT,WRAP53,MRE11A,B3GALTL,ATR,OCA2,BLM,DNA2,VCP,PTEN,ATRX,AR,BRCA2,PDX1,ERCC2,ELP4,PAX6,CDC45,BRCA1,RECQL4
GO Process	GO:1903047	Mitotic cell cycle process	13	616	0.83	5.68e-06	EP300,NBN,ATM,BUB1B,MRE11A,BLM,DNA2,VCP,BRCA2,PAX6,CDC45,BRCA1,TBCE
GO Process	GO:0007420	Brain development	14	745	0.78	6.46e-06	PHOX2B,UBE3A,BMP4,ATM,OXTR,RERE,FOXG1,ASPM,PTEN,ATRX,ZIC2,KDM2B,BRCA2,PAX6
GO Process	GO:1903046	Meiotic cell cycle process	8	165	1.19	6.46e-06	BRIP1,ATM,BUB1B,MRE11A,ASPM,ATRX,BRCA2,FANCA
GO Process	GO:2000113	Negative regulation of cellular macromolecule biosynthetic process	19	1470	0.62	6.60e-06	BMP4,H3F3B,EP300,TINF2,MITF,FOXG1,ATR,BLM,ATRX,AR,ZIC2,KDM2B,BRCA2,PDX1,SATB1,PAX6,EHMT1,BRCA1,WWOX
GO Process	GO:0042127	Regulation of cell population proliferation	20	1642	0.59	6.95e-06	TSC2,PHOX2B,BMP4,BRIP1,TINF2,ATM,MITF,TERT,EDN3,FOXG1,ASPM,PTEN,AR,KDM2B,BRCA2,PDX1,FANCA,PAX6,GDNF,BRCA1
GO Process	GO:0048519	Negative regulation of biological process	37	5389	0.34	7.00e-06	TSC2,PHOX2B,UBE3A,BMP4,H3F3B,BRIP1,EP300,NBN,TINF2,ATM,BUB1B,MITF,TERT,OXTR,MRE11A,GATA4,RERE,FOXG1,ATR,BLM,DNA2,VCP,ASPM,PTEN,ATRX,AR,ZIC2,KDM2B,BRCA2,PDX1,SATB1,PAX6,CDC45,GDNF,EHMT1,BRCA1,WWOX
GO Process	GO:0044818	Mitotic g2/m transition checkpoint	5	30	1.73	7.50e-06	NBN,ATM,MRE11A,BLM,BRCA1
GO Process	GO:0071103	DNA conformation change	10	328	0.99	8.22e-06	H3F3B,BRIP1,NBN,MRE11A,BLM,DNA2,ATRX,ERCC2,CHD2,RECQL4
GO Process	GO:0031297	Replication fork processing	5	32	2023-07-01	9.64e-06	MRE11A,BLM,DNA2,ATRX,BRCA2
GO Process	GO:0031572	G2 DNA damage checkpoint	5	32	2023-07-01	9.64e-06	NBN,ATM,MRE11A,BLM,BRCA1
GO Process	GO:0009987	Cellular process	61	15024	0.11	9.92e-06	EEF1A2,TSC2,PHOX2B,FANCE,UBE3A,BMP4,H3F3B,BRIP1,HERC2,PRDX1,EP300,NBN,TINF2,POLG,ATM,BUB1B,MITF,TERT,FANCI,TUBB3,WRAP53,OXTR,MRE11A,FANCF,GATA4,EDN3,RERE,FOXG1,B3GALTL,ATR,ARID1B,OCA2,BLM,DNA2,VCP,ASPM,PTEN,ATRX,AR,ZIC2,KDM2B,FANCG,BRCA2,TUBB2A,PDX1,BRPF1,FANCA,ERCC2,CHD2,ELP4,KIF5C,PRF1,SATB1,PAX6,CDC45,GDNF,EHMT1,BRCA1,TBCE,WWOX,RECQL4
GO Process	GO:0051172	Negative regulation of nitrogen compound metabolic process	24	2429	0.5	1.02e-05	TSC2,BMP4,H3F3B,EP300,NBN,TINF2,ATM,MITF,TERT,RERE,FOXG1,BLM,PTEN,ATRX,AR,ZIC2,KDM2B,PDX1,SATB1,PAX6,GDNF,EHMT1,BRCA1,WWOX
GO Process	GO:0048232	Male gamete generation	12	543	0.85	1.08e-05	H3F3B,BRIP1,HERC2,ATM,OCA2,ASPM,ATRX,AR,KDM2B,FANCG,BRCA2,FANCA
GO Process	GO:0032501	Multicellular organismal process	42	6933	0.29	1.12e-05	TSC2,PHOX2B,UBE3A,BMP4,H3F3B,BRIP1,HERC2,PRDX1,EP300,NBN,ATM,MITF,TERT,TUBB3,OXTR,GATA4,EDN3,RERE,FOXG1,ATR,ARID1B,OCA2,ASPM,PTEN,ATRX,AR,ZIC2,KDM2B,FANCG,BRCA2,TUBB2A,PDX1,FANCA,ERCC2,CHD2,KIF5C,SATB1,PAX6,GDNF,BRCA1,WWOX,RECQL4
GO Process	GO:0007276	Gamete generation	13	673	0.79	1.35e-05	BMP4,H3F3B,BRIP1,HERC2,ATM,OCA2,ASPM,ATRX,AR,KDM2B,FANCG,BRCA2,FANCA
GO Process	GO:0072331	Signal transduction by p53 class mediator	7	123	1.26	1.42e-05	EP300,NBN,ATM,ATRX,BRCA2,BRCA1,WWOX
GO Process	GO:0008152	Metabolic process	46	8298	0.25	1.63e-05	EEF1A2,FANCE,UBE3A,BMP4,H3F3B,BRIP1,HERC2,PRDX1,EP300,NBN,TINF2,POLG,ATM,BUB1B,MITF,TERT,FANCI,WRAP53,OXTR,MRE11A,FANCF,B3GALTL,ATR,OCA2,BLM,DNA2,VCP,PTEN,ATRX,AR,KDM2B,FANCG,BRCA2,PDX1,BRPF1,FANCA,ERCC2,ELP4,SATB1,PAX6,CDC45,GDNF,EHMT1,BRCA1,WWOX,RECQL4
GO Process	GO:0044238	Primary metabolic process	43	7332	0.27	1.64e-05	EEF1A2,FANCE,UBE3A,BMP4,H3F3B,BRIP1,HERC2,EP300,NBN,TINF2,POLG,ATM,BUB1B,MITF,TERT,FANCI,WRAP53,OXTR,MRE11A,FANCF,B3GALTL,ATR,BLM,DNA2,VCP,PTEN,ATRX,AR,KDM2B,FANCG,BRCA2,PDX1,BRPF1,FANCA,ERCC2,ELP4,SATB1,PAX6,CDC45,GDNF,EHMT1,BRCA1,RECQL4
GO Process	GO:0065008	Regulation of biological quality	31	4042	0.39	1.66e-05	PHOX2B,UBE3A,BMP4,H3F3B,PRDX1,EP300,NBN,TINF2,POLG,ATM,TERT,WRAP53,OXTR,MRE11A,GATA4,EDN3,ATR,BLM,DNA2,VCP,ASPM,PTEN,ATRX,AR,BRCA2,PDX1,ERCC2,PAX6,GDNF,EHMT1,RECQL4
GO Process	GO:0033044	Regulation of chromosome organization	10	359	0.95	1.69e-05	H3F3B,NBN,TINF2,ATM,BUB1B,MRE11A,ATR,ATRX,CDC45,BRCA1
GO Process	GO:0051052	Regulation of dna metabolic process	10	360	0.95	1.72e-05	NBN,TINF2,ATM,WRAP53,MRE11A,ATR,BLM,ATRX,ERCC2,BRCA1
GO Process	GO:0007568	Aging	9	274	2023-02-01	1.88e-05	POLG,ATM,TERT,FOXG1,ATR,PTEN,BRCA2,PDX1,ERCC2
GO Process	GO:0008285	Negative regulation of cell population proliferation	13	696	0.78	1.88e-05	TSC2,PHOX2B,BMP4,BRIP1,TINF2,ATM,TERT,PTEN,AR,KDM2B,BRCA2,PDX1,PAX6
GO Process	GO:0051253	Negative regulation of rna metabolic process	18	1422	0.61	1.88e-05	BMP4,H3F3B,EP300,MITF,TERT,RERE,FOXG1,ATRX,AR,ZIC2,KDM2B,PDX1,SATB1,PAX6,GDNF,EHMT1,BRCA1,WWOX
GO Process	GO:0010628	Positive regulation of gene expression	23	2337	0.5	2.09e-05	PHOX2B,UBE3A,BMP4,EP300,ATM,MITF,TERT,MRE11A,GATA4,ARID1B,BLM,PTEN,ATRX,AR,ZIC2,BRCA2,PDX1,BRPF1,ERCC2,PAX6,GDNF,BRCA1,WWOX
GO Process	GO:0051054	Positive regulation of dna metabolic process	8	200	2023-11-01	2.18e-05	NBN,ATM,WRAP53,MRE11A,ATR,ATRX,ERCC2,BRCA1
GO Process	GO:0008584	Male gonad development	7	133	1.23	2.19e-05	H3F3B,BRIP1,GATA4,ASPM,ATRX,AR,FANCA
GO Process	GO:0051129	Negative regulation of cellular component organization	13	713	0.77	2.35e-05	TSC2,UBE3A,BMP4,H3F3B,EP300,NBN,TINF2,ATM,BUB1B,PTEN,ATRX,AR,BRCA1
GO Process	GO:0071704	Organic substance metabolic process	44	7755	0.26	2.41e-05	EEF1A2,FANCE,UBE3A,BMP4,H3F3B,BRIP1,HERC2,EP300,NBN,TINF2,POLG,ATM,BUB1B,MITF,TERT,FANCI,WRAP53,OXTR,MRE11A,FANCF,B3GALTL,ATR,OCA2,BLM,DNA2,VCP,PTEN,ATRX,AR,KDM2B,FANCG,BRCA2,PDX1,BRPF1,FANCA,ERCC2,ELP4,SATB1,PAX6,CDC45,GDNF,EHMT1,BRCA1,RECQL4
GO Process	GO:0030330	DNA damage response, signal transduction by p53 class mediator	6	82	1.37	2.57e-05	EP300,NBN,ATM,ATRX,BRCA2,BRCA1
GO Process	GO:2001251	Negative regulation of chromosome organization	7	137	1.21	2.57e-05	H3F3B,NBN,TINF2,ATM,BUB1B,ATRX,BRCA1
GO Process	GO:1902531	Regulation of intracellular signal transduction	20	1807	0.55	2.59e-05	TSC2,UBE3A,BMP4,BRIP1,PRDX1,EP300,NBN,ATM,MRE11A,GATA4,EDN3,ATR,BLM,DNA2,PTEN,AR,PDX1,BRPF1,EHMT1,BRCA1
GO Process	GO:0032204	Regulation of telomere maintenance	6	83	1.37	2.69e-05	NBN,TINF2,ATM,MRE11A,ATR,ATRX
GO Process	GO:0009628	Response to abiotic stimulus	16	1147	0.65	2.70e-05	EEF1A2,BRIP1,EP300,POLG,ATM,TERT,OXTR,GATA4,ATR,BLM,VCP,PTEN,FANCG,BRCA2,ERCC2,BRCA1
GO Process	GO:0009790	Embryo development	15	1002	0.68	2.81e-05	TSC2,BMP4,EP300,NBN,ATM,GATA4,FOXG1,AR,KDM2B,BRCA2,PDX1,ERCC2,PAX6,GDNF,BRCA1
GO Process	GO:0008283	Cell population proliferation	11	493	0.85	2.98e-05	BMP4,H3F3B,PRDX1,NBN,MRE11A,RERE,OCA2,ASPM,BRCA2,ERCC2,SATB1
GO Process	GO:0045787	Positive regulation of cell cycle	10	388	0.92	2.98e-05	PHOX2B,EP300,ATM,TERT,EDN3,FOXG1,ATRX,BRCA2,CDC45,BRCA1
GO Process	GO:0035264	Multicellular organism growth	6	86	1.35	3.18e-05	H3F3B,EP300,ATM,ATRX,AR,ERCC2
GO Process	GO:1901991	Negative regulation of mitotic cell cycle phase transition	8	219	2023-07-01	3.83e-05	EP300,NBN,ATM,BUB1B,MRE11A,BLM,PTEN,BRCA1
GO Process	GO:0031399	Regulation of protein modification process	20	1870	0.54	4.25e-05	TSC2,UBE3A,BMP4,PRDX1,EP300,NBN,TINF2,ATM,FANCI,MRE11A,GATA4,EDN3,BLM,VCP,PTEN,ATRX,AR,ELP4,PAX6,BRCA1
GO Process	GO:0140013	Meiotic nuclear division	7	152	1.17	4.66e-05	BRIP1,ATM,BUB1B,MRE11A,ASPM,BRCA2,FANCA
GO Process	GO:0009966	Regulation of signal transduction	26	3107	0.43	5.07e-05	TSC2,UBE3A,BMP4,BRIP1,PRDX1,EP300,NBN,ATM,TERT,MRE11A,GATA4,EDN3,ATR,BLM,DNA2,VCP,ASPM,PTEN,AR,PDX1,BRPF1,FANCA,GDNF,EHMT1,BRCA1,WWOX
GO Process	GO:0007093	Mitotic cell cycle checkpoint	7	156	1.16	5.45e-05	EP300,NBN,ATM,BUB1B,MRE11A,BLM,BRCA1
GO Process	GO:0032206	Positive regulation of telomere maintenance	5	51	2023-05-01	6.20e-05	NBN,ATM,MRE11A,ATR,ATRX
GO Process	GO:2001236	Regulation of extrinsic apoptotic signaling pathway	7	161	1.14	6.52e-05	BMP4,TERT,PTEN,AR,GDNF,BRCA1,WWOX
GO Process	GO:0007095	Mitotic g2 dna damage checkpoint	4	21	1.79	7.51e-05	NBN,ATM,MRE11A,BLM
GO Process	GO:0022412	Cellular process involved in reproduction in multicellular organism	9	345	0.92	0.00010	BMP4,H3F3B,BRIP1,ATM,OCA2,ASPM,FANCG,BRCA2,FANCA
GO Process	GO:0022616	DNA strand elongation	4	23	1.75	0.00010	NBN,TERT,MRE11A,DNA2
GO Process	GO:0007281	Germ cell development	8	256	1.0	0.00011	BMP4,H3F3B,BRIP1,ATM,OCA2,ASPM,FANCG,BRCA2
GO Process	GO:0006275	Regulation of dna replication	6	111	1.24	0.00012	NBN,ATR,BLM,DNA2,ATRX,BRCA2
GO Process	GO:0006325	Chromatin organization	12	713	0.73	0.00014	H3F3B,EP300,ATM,RERE,ARID1B,ATRX,KDM2B,BRCA2,BRPF1,CHD2,SATB1,EHMT1
GO Process	GO:0010646	Regulation of cell communication	27	3514	0.39	0.00014	TSC2,UBE3A,BMP4,BRIP1,PRDX1,EP300,NBN,ATM,TERT,OXTR,MRE11A,GATA4,EDN3,ATR,BLM,DNA2,VCP,ASPM,PTEN,AR,PDX1,BRPF1,FANCA,GDNF,EHMT1,BRCA1,WWOX
GO Process	GO:0035295	Tube development	13	851	0.69	0.00014	TSC2,BMP4,BRIP1,EP300,OXTR,GATA4,PTEN,ATRX,AR,KDM2B,PDX1,PAX6,GDNF
GO Process	GO:1903507	Negative regulation of nucleic acid-templated transcription	16	1324	0.59	0.00015	BMP4,H3F3B,EP300,MITF,RERE,FOXG1,ATRX,AR,ZIC2,KDM2B,PDX1,SATB1,PAX6,EHMT1,BRCA1,WWOX
GO Process	GO:0032202	Telomere assembly	3	6	2.21	0.00016	H3F3B,TINF2,WRAP53
GO Process	GO:0023051	Regulation of signaling	27	3553	0.39	0.00017	TSC2,UBE3A,BMP4,BRIP1,PRDX1,EP300,NBN,ATM,TERT,OXTR,MRE11A,GATA4,EDN3,ATR,BLM,DNA2,VCP,ASPM,PTEN,AR,PDX1,BRPF1,FANCA,GDNF,EHMT1,BRCA1,WWOX
GO Process	GO:0042221	Response to chemical	30	4333	0.35	0.00022	EEF1A2,TSC2,PHOX2B,UBE3A,BMP4,BRIP1,PRDX1,EP300,POLG,ATM,TERT,TUBB3,OXTR,GATA4,EDN3,FOXG1,ATR,ARID1B,BLM,VCP,PTEN,ATRX,AR,PDX1,KIF5C,PAX6,GDNF,EHMT1,BRCA1,WWOX
GO Process	GO:0070192	Chromosome organization involved in meiotic cell cycle	5	68	1.37	0.00022	BRIP1,ATM,BUB1B,MRE11A,ATRX
GO Process	GO:0048699	Generation of neurons	17	1551	0.55	0.00025	PHOX2B,UBE3A,BMP4,EP300,TERT,TUBB3,EDN3,RERE,FOXG1,ARID1B,ASPM,PTEN,TUBB2A,ERCC2,KIF5C,PAX6,GDNF
GO Process	GO:0010639	Negative regulation of organelle organization	9	395	0.86	0.00028	TSC2,BMP4,H3F3B,NBN,TINF2,ATM,BUB1B,ATRX,BRCA1
GO Process	GO:0050680	Negative regulation of epithelial cell proliferation	6	131	1.17	0.00028	BMP4,TINF2,PTEN,AR,BRCA2,PAX6
GO Process	GO:0090068	Positive regulation of cell cycle process	8	294	0.94	0.00028	PHOX2B,EP300,ATM,TERT,EDN3,ATRX,CDC45,BRCA1
GO Process	GO:0043009	Chordate embryonic development	11	640	0.74	0.00030	TSC2,BMP4,EP300,NBN,ATM,AR,KDM2B,BRCA2,ERCC2,PAX6,BRCA1
GO Process	GO:0006303	Double-strand break repair via nonhomologous end joining	5	74	1.34	0.00031	HERC2,NBN,ATM,MRE11A,BRCA1
GO Process	GO:0007283	Spermatogenesis	10	525	0.79	0.00035	H3F3B,BRIP1,HERC2,OCA2,ASPM,ATRX,AR,KDM2B,FANCG,BRCA2
GO Process	GO:2001233	Regulation of apoptotic signaling pathway	9	409	0.85	0.00035	BMP4,TERT,GATA4,PTEN,AR,PDX1,GDNF,BRCA1,WWOX
GO Process	GO:0045944	Positive regulation of transcription by rna polymerase ii	15	1253	0.58	0.00036	PHOX2B,UBE3A,BMP4,EP300,ATM,MITF,TERT,GATA4,ATRX,AR,PDX1,PAX6,GDNF,BRCA1,WWOX
GO Process	GO:0045892	Negative regulation of transcription, dna-templated	15	1273	0.58	0.00043	BMP4,H3F3B,EP300,MITF,FOXG1,ATRX,AR,ZIC2,KDM2B,PDX1,SATB1,PAX6,EHMT1,BRCA1,WWOX
GO Process	GO:0051128	Regulation of cellular component organization	21	2402	0.45	0.00043	TSC2,UBE3A,BMP4,H3F3B,EP300,NBN,TINF2,ATM,BUB1B,OXTR,MRE11A,EDN3,ATR,VCP,PTEN,ATRX,AR,KDM2B,ERCC2,CDC45,BRCA1
GO Process	GO:0010212	Response to ionizing radiation	6	145	2023-12-01	0.00047	POLG,ATM,ATR,BLM,BRCA2,BRCA1
GO Process	GO:0009314	Response to radiation	9	431	0.83	0.00052	EP300,POLG,ATM,ATR,BLM,FANCG,BRCA2,ERCC2,BRCA1
GO Process	GO:0097193	Intrinsic apoptotic signaling pathway	6	151	2023-11-01	0.00057	EP300,NBN,ATM,BRCA2,BRCA1,WWOX
GO Process	GO:2001234	Negative regulation of apoptotic signaling pathway	7	232	0.99	0.00057	BMP4,TERT,GATA4,AR,PDX1,GDNF,BRCA1
GO Process	GO:0000904	Cell morphogenesis involved in differentiation	10	566	0.75	0.00064	PHOX2B,EP300,TUBB3,RERE,FOXG1,PTEN,AR,KIF5C,PAX6,GDNF
GO Process	GO:0045839	Negative regulation of mitotic nuclear division	4	40	1.51	0.00065	BMP4,ATM,BUB1B,ATRX
GO Process	GO:0048863	Stem cell differentiation	6	156	2023-09-01	0.00068	PHOX2B,EDN3,PDX1,ERCC2,CHD2,GDNF
GO Process	GO:0008585	Female gonad development	5	91	1.25	0.00074	UBE3A,ATM,FANCG,BRCA2,FANCA
GO Process	GO:0030850	Prostate gland development	4	42	1.48	0.00076	UBE3A,BMP4,PTEN,AR
GO Process	GO:0060736	Prostate gland growth	3	12	2023-09-01	0.00077	UBE3A,PTEN,AR
GO Process	GO:0072520	Seminiferous tubule development	3	12	2023-09-01	0.00077	BRIP1,ATRX,AR
GO Process	GO:0090656	T-circle formation	3	12	2023-09-01	0.00077	NBN,BLM,DNA2
GO Process	GO:2000026	Regulation of multicellular organismal development	19	2096	0.46	0.00077	PHOX2B,UBE3A,BMP4,H3F3B,EP300,MITF,TERT,OXTR,GATA4,FOXG1,ASPM,PTEN,AR,BRCA2,FANCA,PAX6,GDNF,EHMT1,BRCA1
GO Process	GO:2000648	Positive regulation of stem cell proliferation	4	43	1.47	0.00080	TERT,FOXG1,ASPM,PAX6
GO Process	GO:0065009	Regulation of molecular function	31	4913	0.31	0.00086	EEF1A2,TSC2,PHOX2B,UBE3A,BMP4,HERC2,EP300,NBN,MITF,TERT,WRAP53,MRE11A,GATA4,EDN3,RERE,FOXG1,ARID1B,BLM,VCP,PTEN,AR,ZIC2,PDX1,FANCA,ERCC2,ELP4,SATB1,PAX6,GDNF,BRCA1,WWOX
GO Process	GO:0090399	Replicative senescence	3	13	1.87	0.00090	ATM,TERT,ATR
GO Process	GO:0050794	Regulation of cellular process	50	10932	0.17	0.00095	EEF1A2,TSC2,PHOX2B,UBE3A,BMP4,H3F3B,BRIP1,PRDX1,EP300,NBN,TINF2,ATM,BUB1B,MITF,TERT,FANCI,TUBB3,WRAP53,OXTR,MRE11A,GATA4,EDN3,RERE,FOXG1,ATR,ARID1B,BLM,DNA2,VCP,ASPM,PTEN,ATRX,AR,ZIC2,KDM2B,BRCA2,PDX1,BRPF1,FANCA,ERCC2,CHD2,ELP4,PRF1,SATB1,PAX6,CDC45,GDNF,EHMT1,BRCA1,WWOX
GO Process	GO:0021537	Telencephalon development	7	257	0.94	0.00099	BMP4,OXTR,FOXG1,ASPM,PTEN,KDM2B,PAX6
GO Process	GO:0000122	Negative regulation of transcription by rna polymerase ii	12	895	0.63	0.0011	BMP4,EP300,MITF,FOXG1,ATRX,AR,KDM2B,PDX1,SATB1,PAX6,EHMT1,WWOX
GO Process	GO:0009653	Anatomical structure morphogenesis	19	2165	0.45	0.0011	TSC2,PHOX2B,BMP4,EP300,ATM,TUBB3,GATA4,RERE,FOXG1,PTEN,ATRX,AR,KDM2B,PDX1,ERCC2,KIF5C,PAX6,GDNF,WWOX
GO Process	GO:0009888	Tissue development	17	1760	0.49	0.0011	TSC2,PHOX2B,BMP4,EP300,ATM,TUBB3,GATA4,EDN3,PTEN,ATRX,AR,KDM2B,PDX1,ERCC2,SATB1,PAX6,GDNF
GO Process	GO:0022607	Cellular component assembly	20	2359	0.43	0.0011	H3F3B,BRIP1,EP300,NBN,TINF2,MITF,TERT,WRAP53,ARID1B,BLM,DNA2,VCP,ASPM,PTEN,ATRX,FANCA,ERCC2,PRF1,CDC45,TBCE
GO Process	GO:0044773	Mitotic dna damage checkpoint	5	101	2023-02-01	0.0011	EP300,NBN,ATM,MRE11A,BLM
GO Process	GO:0051094	Positive regulation of developmental process	15	1389	0.54	0.0011	PHOX2B,BMP4,EP300,TERT,OXTR,GATA4,EDN3,FOXG1,ASPM,PTEN,AR,KDM2B,PAX6,GDNF,BRCA1
GO Process	GO:0051099	Positive regulation of binding	6	175	2023-04-01	0.0011	BMP4,EP300,TERT,PDX1,ERCC2,PAX6
GO Process	GO:0051240	Positive regulation of multicellular organismal process	17	1770	0.49	0.0011	PHOX2B,BMP4,EP300,TERT,OXTR,MRE11A,GATA4,EDN3,FOXG1,ASPM,PTEN,AR,KDM2B,PAX6,GDNF,EHMT1,BRCA1
GO Process	GO:0065007	Biological regulation	53	12171	0.15	0.0011	EEF1A2,TSC2,PHOX2B,UBE3A,BMP4,H3F3B,BRIP1,HERC2,PRDX1,EP300,NBN,TINF2,POLG,ATM,BUB1B,MITF,TERT,FANCI,TUBB3,WRAP53,OXTR,MRE11A,GATA4,EDN3,RERE,FOXG1,ATR,ARID1B,BLM,DNA2,VCP,ASPM,PTEN,ATRX,AR,ZIC2,KDM2B,BRCA2,PDX1,BRPF1,FANCA,ERCC2,CHD2,ELP4,PRF1,SATB1,PAX6,CDC45,GDNF,EHMT1,BRCA1,WWOX,RECQL4
GO Process	GO:0071897	DNA biosynthetic process	5	101	2023-02-01	0.0011	POLG,TERT,WRAP53,MRE11A,VCP
GO Process	GO:0000226	Microtubule cytoskeleton organization	9	492	0.77	0.0012	TUBB3,VCP,ASPM,ATRX,BRCA2,TUBB2A,PAX6,BRCA1,TBCE
GO Process	GO:0019438	Aromatic compound biosynthetic process	13	1070	0.59	0.0012	POLG,MITF,TERT,WRAP53,MRE11A,OCA2,VCP,PTEN,AR,PDX1,ERCC2,ELP4,PAX6
GO Process	GO:0070482	Response to oxygen levels	8	379	0.83	0.0013	BRIP1,EP300,POLG,ATM,TERT,OXTR,PTEN,ERCC2
GO Process	GO:2001237	Negative regulation of extrinsic apoptotic signaling pathway	5	106	1.18	0.0013	BMP4,TERT,AR,GDNF,BRCA1
GO Process	GO:0040011	Locomotion	14	1251	0.56	0.0014	TSC2,PHOX2B,BMP4,EP300,TUBB3,EDN3,RERE,FOXG1,ASPM,PTEN,TUBB2A,KIF5C,PAX6,GDNF
GO Process	GO:0090329	Regulation of dna-dependent dna replication	4	51	2023-04-01	0.0014	NBN,BLM,ATRX,BRCA2
GO Process	GO:2001252	Positive regulation of chromosome organization	6	184	2023-02-01	0.0014	NBN,ATM,MRE11A,ATR,ATRX,BRCA1
GO Process	GO:0010629	Negative regulation of gene expression	18	2014	0.46	0.0015	BMP4,H3F3B,BRIP1,EP300,ATM,MITF,TERT,FOXG1,ATRX,AR,ZIC2,KDM2B,PDX1,SATB1,PAX6,EHMT1,BRCA1,WWOX
GO Process	GO:0030900	Forebrain development	8	387	0.82	0.0015	BMP4,OXTR,FOXG1,ASPM,PTEN,ATRX,KDM2B,PAX6
GO Process	GO:0042325	Regulation of phosphorylation	16	1626	0.5	0.0015	EEF1A2,TSC2,BMP4,PRDX1,EP300,NBN,ATM,MRE11A,GATA4,EDN3,BLM,VCP,PTEN,AR,ELP4,PAX6
GO Process	GO:0050793	Regulation of developmental process	21	2648	0.41	0.0015	PHOX2B,UBE3A,BMP4,H3F3B,EP300,MITF,TERT,OXTR,GATA4,EDN3,FOXG1,ASPM,PTEN,AR,KDM2B,BRCA2,FANCA,PAX6,GDNF,EHMT1,BRCA1
GO Process	GO:0044093	Positive regulation of molecular function	17	1842	0.47	0.0018	EEF1A2,TSC2,BMP4,EP300,NBN,TERT,WRAP53,MRE11A,EDN3,VCP,PTEN,AR,ZIC2,PDX1,ERCC2,PAX6,GDNF
GO Process	GO:0050768	Negative regulation of neurogenesis	7	287	0.89	0.0018	PHOX2B,UBE3A,TERT,FOXG1,ASPM,PTEN,PAX6
GO Process	GO:0010332	Response to gamma radiation	4	58	1.34	0.0020	POLG,ATM,ATR,BRCA2
GO Process	GO:0010389	Regulation of g2/m transition of mitotic cell cycle	6	198	0.99	0.0020	PHOX2B,NBN,ATM,MRE11A,BLM,BRCA1
GO Process	GO:0032268	Regulation of cellular protein metabolic process	21	2693	0.4	0.0020	EEF1A2,TSC2,UBE3A,BMP4,PRDX1,EP300,NBN,TINF2,ATM,FANCI,MRE11A,GATA4,EDN3,BLM,VCP,PTEN,ATRX,AR,ELP4,PAX6,BRCA1
GO Process	GO:0033043	Regulation of organelle organization	14	1306	0.54	0.0020	TSC2,BMP4,H3F3B,EP300,NBN,TINF2,ATM,BUB1B,MRE11A,EDN3,ATR,ATRX,CDC45,BRCA1
GO Process	GO:0048583	Regulation of response to stimulus	27	4114	0.32	0.0020	TSC2,UBE3A,BMP4,BRIP1,PRDX1,EP300,NBN,ATM,TERT,WRAP53,MRE11A,GATA4,EDN3,ATR,BLM,DNA2,VCP,ASPM,PTEN,AR,PDX1,BRPF1,FANCA,GDNF,EHMT1,BRCA1,WWOX
GO Process	GO:0070887	Cellular response to chemical stimulus	22	2919	0.38	0.0020	PHOX2B,UBE3A,BMP4,BRIP1,PRDX1,EP300,POLG,ATM,TERT,OXTR,GATA4,EDN3,ARID1B,BLM,VCP,PTEN,ATRX,AR,PAX6,GDNF,BRCA1,WWOX
GO Process	GO:0003309	Type b pancreatic cell differentiation	3	19	2023-07-01	0.0021	BMP4,PDX1,PAX6
GO Process	GO:0048732	Gland development	8	410	0.8	0.0021	UBE3A,BMP4,ATM,OXTR,PTEN,AR,PDX1,PAX6
GO Process	GO:0010035	Response to inorganic substance	9	538	0.73	0.0022	EEF1A2,UBE3A,PRDX1,TERT,BLM,VCP,PTEN,ATRX,PDX1
GO Process	GO:0043388	Positive regulation of dna binding	4	59	1.34	0.0022	EP300,PDX1,ERCC2,PAX6
GO Process	GO:0001764	Neuron migration	5	123	2023-12-01	0.0024	PHOX2B,FOXG1,ASPM,TUBB2A,PAX6
GO Process	GO:0034654	Nucleobase-containing compound biosynthetic process	12	995	0.59	0.0025	POLG,MITF,TERT,WRAP53,MRE11A,VCP,PTEN,AR,PDX1,ERCC2,ELP4,PAX6
GO Process	GO:0042330	Taxis	9	547	0.72	0.0025	TSC2,BMP4,EP300,TUBB3,EDN3,FOXG1,KIF5C,PAX6,GDNF
GO Process	GO:0045597	Positive regulation of cell differentiation	12	993	0.59	0.0025	PHOX2B,BMP4,EP300,TERT,GATA4,EDN3,FOXG1,ASPM,PTEN,AR,PAX6,GDNF
GO Process	GO:0030318	Melanocyte differentiation	3	21	1.66	0.0026	MITF,EDN3,OCA2
GO Process	GO:0097694	Establishment of rna localization to telomere	2	2	2.51	0.0027	ATM,ATR
GO Process	GO:0097695	Establishment of protein-containing complex localization to telomere	2	2	2.51	0.0027	ATM,ATR
GO Process	GO:1904884	Positive regulation of telomerase catalytic core complex assembly	2	2	2.51	0.0027	ATM,ATR
GO Process	GO:0007004	Telomere maintenance via telomerase	3	22	1.64	0.0029	TERT,WRAP53,MRE11A
GO Process	GO:0009952	Anterior/posterior pattern specification	6	214	0.95	0.0029	BMP4,EP300,ATM,GATA4,KDM2B,PAX6
GO Process	GO:0007569	Cell aging	4	66	1.29	0.0031	ATM,TERT,ATR,BRCA2
GO Process	GO:0030182	Neuron differentiation	12	1019	0.58	0.0031	PHOX2B,BMP4,TUBB3,EDN3,RERE,FOXG1,ARID1B,PTEN,ERCC2,KIF5C,PAX6,GDNF
GO Process	GO:0042981	Regulation of apoptotic process	15	1550	0.49	0.0031	EEF1A2,BMP4,ATM,MITF,TERT,MRE11A,GATA4,VCP,PTEN,AR,KDM2B,PDX1,GDNF,BRCA1,WWOX
GO Process	GO:0002052	Positive regulation of neuroblast proliferation	3	23	1.62	0.0032	FOXG1,ASPM,PAX6
GO Process	GO:0045665	Negative regulation of neuron differentiation	6	222	0.94	0.0034	PHOX2B,UBE3A,FOXG1,ASPM,PTEN,PAX6
GO Process	GO:0048667	Cell morphogenesis involved in neuron differentiation	8	445	0.76	0.0034	PHOX2B,TUBB3,RERE,FOXG1,PTEN,KIF5C,PAX6,GDNF
GO Process	GO:1901362	Organic cyclic compound biosynthetic process	13	1211	0.54	0.0036	POLG,MITF,TERT,WRAP53,MRE11A,OCA2,VCP,PTEN,AR,PDX1,ERCC2,ELP4,PAX6
GO Process	GO:0003002	Regionalization	7	332	0.83	0.0037	BMP4,EP300,ATM,GATA4,FOXG1,KDM2B,PAX6
GO Process	GO:0007017	Microtubule-based process	10	727	0.64	0.0037	TUBB3,VCP,ASPM,ATRX,BRCA2,TUBB2A,KIF5C,PAX6,BRCA1,TBCE
GO Process	GO:0048646	Anatomical structure formation involved in morphogenesis	11	883	0.6	0.0037	TSC2,BMP4,EP300,ATM,GATA4,PTEN,AR,KDM2B,ERCC2,PAX6,GDNF
GO Process	GO:0008630	Intrinsic apoptotic signaling pathway in response to dna damage	4	71	1.26	0.0038	EP300,ATM,BRCA2,BRCA1
GO Process	GO:0043066	Negative regulation of apoptotic process	11	893	0.6	0.0041	BMP4,MITF,TERT,MRE11A,GATA4,PTEN,AR,KDM2B,PDX1,GDNF,BRCA1
GO Process	GO:0080135	Regulation of cellular response to stress	10	739	0.64	0.0041	PRDX1,EP300,ATM,TERT,WRAP53,GATA4,ATR,PTEN,PDX1,BRCA1
GO Process	GO:0016331	Morphogenesis of embryonic epithelium	5	144	2023-05-01	0.0043	TSC2,BMP4,KDM2B,PDX1,GDNF
GO Process	GO:0033365	Protein localization to organelle	10	743	0.64	0.0043	TSC2,BMP4,TINF2,ATM,TERT,WRAP53,ATR,ATRX,BRCA2,PAX6
GO Process	GO:1903322	Positive regulation of protein modification by small protein conjugation or removal	5	147	2023-04-01	0.0046	UBE3A,FANCI,VCP,PTEN,BRCA1
GO Process	GO:0010647	Positive regulation of cell communication	16	1823	0.45	0.0048	UBE3A,BMP4,EP300,ATM,TERT,OXTR,GATA4,EDN3,ATR,VCP,ASPM,PTEN,AR,PDX1,GDNF,WWOX
GO Process	GO:0006915	Apoptotic process	11	918	0.58	0.0050	TSC2,EP300,NBN,ATM,BUB1B,PTEN,BRCA2,ERCC2,PRF1,BRCA1,WWOX
GO Process	GO:0016570	Histone modification	7	351	0.81	0.0050	EP300,ATM,KDM2B,BRCA2,BRPF1,SATB1,EHMT1
GO Process	GO:0023056	Positive regulation of signaling	16	1831	0.45	0.0050	UBE3A,BMP4,EP300,ATM,TERT,OXTR,GATA4,EDN3,ATR,VCP,ASPM,PTEN,AR,PDX1,GDNF,WWOX
GO Process	GO:0032989	Cellular component morphogenesis	9	614	0.67	0.0051	PHOX2B,TUBB3,RERE,FOXG1,PTEN,ERCC2,KIF5C,PAX6,GDNF
GO Process	GO:0036293	Response to decreased oxygen levels	7	354	0.8	0.0052	BRIP1,EP300,ATM,TERT,OXTR,PTEN,ERCC2
GO Process	GO:0009786	Regulation of asymmetric cell division	2	4	2.21	0.0058	ASPM,PAX6
GO Process	GO:0031860	Telomeric 3 overhang formation	2	4	2.21	0.0058	NBN,MRE11A
GO Process	GO:0045931	Positive regulation of mitotic cell cycle	5	156	2023-01-01	0.0058	PHOX2B,TERT,EDN3,BRCA2,CDC45
GO Process	GO:2000045	Regulation of g1/s transition of mitotic cell cycle	5	156	2023-01-01	0.0058	EP300,ATM,TERT,PTEN,CDC45
GO Process	GO:0033048	Negative regulation of mitotic sister chromatid segregation	3	30	1.51	0.0059	ATM,BUB1B,ATRX
GO Process	GO:0060429	Epithelium development	12	1109	0.54	0.0059	TSC2,BMP4,EP300,ATM,GATA4,ATRX,AR,KDM2B,PDX1,ERCC2,PAX6,GDNF
GO Process	GO:0045595	Regulation of cell differentiation	16	1874	0.44	0.0062	PHOX2B,UBE3A,BMP4,H3F3B,EP300,MITF,TERT,GATA4,EDN3,FOXG1,ASPM,PTEN,AR,FANCA,PAX6,GDNF
GO Process	GO:0048477	Oogenesis	4	83	1.19	0.0062	H3F3B,ATM,ASPM,BRCA2
GO Process	GO:0010165	Response to x-ray	3	31	1.49	0.0063	ATM,BLM,BRCA2
GO Process	GO:0048812	Neuron projection morphogenesis	8	495	0.71	0.0063	PHOX2B,TUBB3,RERE,FOXG1,PTEN,KIF5C,PAX6,GDNF
GO Process	GO:0007088	Regulation of mitotic nuclear division	5	162	1.0	0.0067	BMP4,ATM,BUB1B,EDN3,ATRX
GO Process	GO:0016233	Telomere capping	3	32	1.48	0.0068	NBN,TINF2,MRE11A
GO Process	GO:0009791	Post-embryonic development	4	86	1.17	0.0069	BMP4,ATM,ATRX,ERCC2
GO Process	GO:0051239	Regulation of multicellular organismal process	22	3227	0.34	0.0070	PHOX2B,UBE3A,BMP4,H3F3B,EP300,MITF,TERT,OXTR,MRE11A,GATA4,EDN3,FOXG1,ASPM,PTEN,AR,KDM2B,BRCA2,FANCA,PAX6,GDNF,EHMT1,BRCA1
GO Process	GO:0045132	Meiotic chromosome segregation	4	87	1.17	0.0071	BRIP1,ATM,BUB1B,MRE11A
GO Process	GO:0009887	Animal organ morphogenesis	11	967	0.56	0.0072	BMP4,EP300,GATA4,FOXG1,PTEN,AR,KDM2B,PDX1,PAX6,GDNF,WWOX
GO Process	GO:0002520	Immune system development	9	652	0.65	0.0073	BMP4,EP300,NBN,ATM,MITF,BRCA2,ERCC2,CHD2,SATB1
GO Process	GO:2000177	Regulation of neural precursor cell proliferation	4	88	1.16	0.0073	FOXG1,ASPM,KDM2B,PAX6
GO Process	GO:0007059	Chromosome segregation	6	268	0.86	0.0077	BRIP1,ATM,BUB1B,MRE11A,ERCC2,BRCA1
GO Process	GO:0007409	Axonogenesis	7	384	0.77	0.0077	PHOX2B,TUBB3,FOXG1,PTEN,KIF5C,PAX6,GDNF
GO Process	GO:0008156	Negative regulation of dna replication	3	34	1.45	0.0078	ATR,BLM,BRCA2
GO Process	GO:0021532	Neural tube patterning	3	35	1.44	0.0084	BMP4,KDM2B,PAX6
GO Process	GO:1905332	Positive regulation of morphogenesis of an epithelium	3	35	1.44	0.0084	BMP4,AR,GDNF
GO Process	GO:0043412	Macromolecule modification	22	3277	0.33	0.0085	UBE3A,BMP4,HERC2,EP300,ATM,BUB1B,OXTR,B3GALTL,ATR,VCP,PTEN,ATRX,AR,KDM2B,BRCA2,BRPF1,ERCC2,ELP4,SATB1,GDNF,EHMT1,BRCA1
GO Process	GO:0030521	Androgen receptor signaling pathway	3	36	1.43	0.0089	UBE3A,AR,BRCA1
GO Process	GO:0031175	Neuron projection development	9	680	0.63	0.0096	PHOX2B,TUBB3,RERE,FOXG1,ARID1B,PTEN,KIF5C,PAX6,GDNF
GO Process	GO:0000019	Regulation of mitotic recombination	2	6	2023-03-02	0.0097	MRE11A,ERCC2
GO Process	GO:0035265	Organ growth	4	96	1.13	0.0097	UBE3A,GATA4,PTEN,AR
GO Process	GO:0060685	Regulation of prostatic bud formation	2	6	2023-03-02	0.0097	BMP4,AR
GO Process	GO:0003156	Regulation of animal organ formation	3	38	2023-04-01	0.0102	BMP4,AR,GDNF
GO Process	GO:0032205	Negative regulation of telomere maintenance	3	38	2023-04-01	0.0102	NBN,TINF2,ATM
GO Process	GO:1901700	Response to oxygen-containing compound	14	1567	0.46	0.0102	UBE3A,BRIP1,PRDX1,POLG,ATM,OXTR,GATA4,ARID1B,BLM,VCP,PTEN,AR,PDX1,BRCA1
GO Process	GO:0009725	Response to hormone	10	849	0.58	0.0105	UBE3A,BMP4,BRIP1,EP300,OXTR,ARID1B,PTEN,AR,PDX1,BRCA1
GO Process	GO:0006935	Chemotaxis	8	545	0.67	0.0107	TSC2,BMP4,TUBB3,EDN3,FOXG1,KIF5C,PAX6,GDNF
GO Process	GO:0051962	Positive regulation of nervous system development	8	547	0.67	0.0109	PHOX2B,BMP4,EP300,OXTR,FOXG1,ASPM,PTEN,PAX6
GO Process	GO:0002065	Columnar/cuboidal epithelial cell differentiation	4	101	2023-01-01	0.0113	BMP4,GATA4,PDX1,PAX6
GO Process	GO:0051130	Positive regulation of cellular component organization	12	1209	0.5	0.0114	EP300,NBN,ATM,OXTR,MRE11A,EDN3,ATR,VCP,ATRX,AR,ERCC2,BRCA1
GO Process	GO:0044806	G-quadruplex DNA unwinding	2	7	1.96	0.0118	BLM,DNA2
GO Process	GO:0060290	Transdifferentiation	2	7	1.96	0.0118	GATA4,PDX1
GO Process	GO:0061002	Negative regulation of dendritic spine morphogenesis	2	7	1.96	0.0118	UBE3A,PTEN
GO Process	GO:0001709	Cell fate determination	3	42	1.36	0.0128	BMP4,FOXG1,PAX6
GO Process	GO:0000018	Regulation of dna recombination	4	106	2023-08-01	0.0132	WRAP53,MRE11A,BLM,ERCC2
GO Process	GO:0043279	Response to alkaloid	4	106	2023-08-01	0.0132	UBE3A,OXTR,BLM,PDX1
GO Process	GO:2001022	Positive regulation of response to dna damage stimulus	4	106	2023-08-01	0.0132	ATM,WRAP53,ATR,BRCA1
GO Process	GO:0097659	Nucleic acid-templated transcription	8	568	0.65	0.0134	MITF,TERT,PTEN,AR,PDX1,ERCC2,ELP4,PAX6
GO Process	GO:0032870	Cellular response to hormone stimulus	8	569	0.65	0.0135	UBE3A,BMP4,BRIP1,OXTR,ARID1B,PTEN,AR,BRCA1
GO Process	GO:0033260	Nuclear dna replication	3	43	1.35	0.0135	DNA2,BRCA2,CDC45
GO Process	GO:1901701	Cellular response to oxygen-containing compound	11	1055	0.52	0.0135	BRIP1,PRDX1,POLG,ATM,GATA4,ARID1B,BLM,VCP,PTEN,AR,BRCA1
GO Process	GO:0030097	Hemopoiesis	8	570	0.65	0.0136	BMP4,EP300,ATM,MITF,BRCA2,ERCC2,CHD2,SATB1
GO Process	GO:0048598	Embryonic morphogenesis	8	571	0.65	0.0137	TSC2,BMP4,GATA4,FOXG1,KDM2B,PDX1,PAX6,GDNF
GO Process	GO:0051302	Regulation of cell division	5	197	0.91	0.0138	EDN3,BLM,ASPM,BRCA2,PAX6
GO Process	GO:0060562	Epithelial tube morphogenesis	6	307	0.8	0.0140	TSC2,BMP4,GATA4,AR,KDM2B,GDNF
GO Process	GO:0002009	Morphogenesis of an epithelium	7	435	0.71	0.0141	TSC2,BMP4,GATA4,AR,KDM2B,PDX1,GDNF
GO Process	GO:0003337	Mesenchymal to epithelial transition involved in metanephros morphogenesis	2	8	2023-09-01	0.0141	BMP4,GDNF
GO Process	GO:0007270	Neuron-neuron synaptic transmission	2	8	2023-09-01	0.0141	ARID1B,PTEN
GO Process	GO:1904354	Negative regulation of telomere capping	2	8	2023-09-01	0.0141	NBN,ATM
GO Process	GO:0071156	Regulation of cell cycle arrest	4	110	2023-07-01	0.0144	PHOX2B,EP300,ATM,BRCA1
GO Process	GO:0031401	Positive regulation of protein modification process	12	1252	0.49	0.0146	UBE3A,BMP4,NBN,ATM,FANCI,MRE11A,GATA4,EDN3,VCP,PTEN,AR,BRCA1
GO Process	GO:0006289	Nucleotide-excision repair	4	111	2023-06-01	0.0148	BRIP1,EP300,BRCA2,ERCC2
GO Process	GO:0009719	Response to endogenous stimulus	13	1447	0.46	0.0149	PHOX2B,UBE3A,BMP4,BRIP1,EP300,OXTR,ARID1B,BLM,PTEN,AR,PDX1,BRCA1,WWOX
GO Process	GO:0007127	Meiosis i	4	112	2023-06-01	0.0152	BRIP1,ATM,MRE11A,BRCA2
GO Process	GO:0007140	Male meiotic nuclear division	3	46	1.32	0.0154	ATM,BRCA2,FANCA
GO Process	GO:0001932	Regulation of protein phosphorylation	13	1459	0.46	0.0160	TSC2,BMP4,PRDX1,NBN,ATM,MRE11A,GATA4,EDN3,BLM,PTEN,AR,ELP4,PAX6
GO Process	GO:0006338	Chromatin remodeling	5	206	0.89	0.0161	H3F3B,RERE,ARID1B,ATRX,SATB1
GO Process	GO:2000278	Regulation of dna biosynthetic process	4	114	2023-05-01	0.0161	TINF2,ATM,WRAP53,ATR
GO Process	GO:0009968	Negative regulation of signal transduction	12	1271	0.48	0.0162	TSC2,BMP4,ATM,TERT,GATA4,VCP,PTEN,AR,PDX1,GDNF,BRCA1,WWOX
GO Process	GO:0048568	Embryonic organ development	7	448	0.7	0.0163	BMP4,GATA4,FOXG1,KDM2B,ERCC2,PAX6,GDNF
GO Process	GO:0006264	Mitochondrial dna replication	2	9	1.85	0.0164	POLG,DNA2
GO Process	GO:0048478	Replication fork protection	2	9	1.85	0.0164	BLM,BRCA2
GO Process	GO:0061820	Telomeric d-loop disassembly	2	9	1.85	0.0164	BLM,RECQL4
GO Process	GO:2001239	Regulation of extrinsic apoptotic signaling pathway in absence of ligand	3	48	2023-03-01	0.0169	TERT,GDNF,WWOX
GO Process	GO:0008284	Positive regulation of cell population proliferation	10	919	0.54	0.0170	BMP4,TERT,EDN3,FOXG1,ASPM,PTEN,AR,PDX1,PAX6,GDNF
GO Process	GO:0043401	Steroid hormone mediated signaling pathway	4	118	2023-04-01	0.0177	UBE3A,BMP4,AR,BRCA1
GO Process	GO:0060485	Mesenchyme development	5	212	0.88	0.0178	PHOX2B,BMP4,GATA4,EDN3,GDNF
GO Process	GO:0048545	Response to steroid hormone	6	328	0.77	0.0183	UBE3A,BMP4,OXTR,AR,PDX1,BRCA1
GO Process	GO:0072332	Intrinsic apoptotic signaling pathway by p53 class mediator	3	51	1.28	0.0197	EP300,BRCA2,WWOX
GO Process	GO:0051960	Regulation of nervous system development	10	942	0.53	0.0203	PHOX2B,UBE3A,BMP4,EP300,TERT,OXTR,FOXG1,ASPM,PTEN,PAX6
GO Process	GO:0001838	Embryonic epithelial tube formation	4	123	2023-02-01	0.0204	TSC2,BMP4,KDM2B,GDNF
GO Process	GO:0001755	Neural crest cell migration	3	52	1.27	0.0207	PHOX2B,EDN3,GDNF
GO Process	GO:0016032	Viral process	9	776	0.57	0.0207	TSC2,UBE3A,EP300,NBN,WRAP53,MRE11A,VCP,ERCC2,SATB1
GO Process	GO:0001541	Ovarian follicle development	3	53	1.26	0.0216	UBE3A,ATM,FANCG
GO Process	GO:0007131	Reciprocal meiotic recombination	3	53	1.26	0.0216	BRIP1,ATM,MRE11A
GO Process	GO:0050918	Positive chemotaxis	3	53	1.26	0.0216	TSC2,BMP4,GDNF
GO Process	GO:0006464	Cellular protein modification process	20	3063	0.32	0.0217	UBE3A,BMP4,HERC2,EP300,ATM,BUB1B,OXTR,B3GALTL,ATR,VCP,PTEN,AR,KDM2B,BRCA2,BRPF1,ERCC2,SATB1,GDNF,EHMT1,BRCA1
GO Process	GO:0031398	Positive regulation of protein ubiquitination	4	126	2023-01-01	0.0217	UBE3A,FANCI,PTEN,BRCA1
GO Process	GO:0051053	Negative regulation of dna metabolic process	4	126	2023-01-01	0.0217	NBN,TINF2,ATM,BLM
GO Process	GO:0071310	Cellular response to organic substance	17	2369	0.36	0.0217	PHOX2B,UBE3A,BMP4,BRIP1,EP300,POLG,ATM,OXTR,GATA4,ARID1B,BLM,VCP,PTEN,AR,PAX6,BRCA1,WWOX
GO Process	GO:0001666	Response to hypoxia	6	342	0.75	0.0218	BRIP1,EP300,ATM,TERT,PTEN,ERCC2
GO Process	GO:1902969	Mitotic dna replication	2	11	1.77	0.0218	BRCA2,CDC45
GO Process	GO:0044271	Cellular nitrogen compound biosynthetic process	13	1522	0.44	0.0219	EEF1A2,POLG,MITF,TERT,WRAP53,MRE11A,VCP,PTEN,AR,PDX1,ERCC2,ELP4,PAX6
GO Process	GO:0050769	Positive regulation of neurogenesis	7	479	0.67	0.0222	PHOX2B,BMP4,EP300,FOXG1,ASPM,PTEN,PAX6
GO Process	GO:0048565	Digestive tract development	4	128	1.0	0.0224	BMP4,OXTR,GATA4,PDX1
GO Process	GO:0032210	Regulation of telomere maintenance via telomerase	3	55	1.24	0.0229	TINF2,ATM,ATR
GO Process	GO:0042063	Gliogenesis	5	228	0.85	0.0230	PHOX2B,FOXG1,PTEN,ERCC2,PAX6
GO Process	GO:0045995	Regulation of embryonic development	4	130	0.99	0.0235	BMP4,AR,GDNF,EHMT1
GO Process	GO:0060688	Regulation of morphogenesis of a branching structure	3	56	1.24	0.0240	BMP4,AR,GDNF
GO Process	GO:0021903	Rostrocaudal neural tube patterning	2	12	1.73	0.0245	KDM2B,PAX6
GO Process	GO:0042711	Maternal behavior	2	12	1.73	0.0245	OXTR,PTEN
GO Process	GO:0048484	Enteric nervous system development	2	12	1.73	0.0245	PHOX2B,GDNF
GO Process	GO:0072425	Signal transduction involved in g2 dna damage checkpoint	2	12	1.73	0.0245	ATM,BRCA1
GO Process	GO:0021872	Forebrain generation of neurons	3	58	1.22	0.0260	FOXG1,ASPM,PAX6
GO Process	GO:0045143	Homologous chromosome segregation	3	59	1.21	0.0271	BRIP1,ATM,MRE11A
GO Process	GO:0000212	Meiotic spindle organization	2	13	1.69	0.0277	ASPM,ATRX
GO Process	GO:0021978	Telencephalon regionalization	2	13	1.69	0.0277	BMP4,PAX6
GO Process	GO:0033605	Positive regulation of catecholamine secretion	2	13	1.69	0.0277	OXTR,GDNF
GO Process	GO:0060968	Regulation of gene silencing	4	137	0.97	0.0277	BMP4,H3F3B,TERT,CDC45
GO Process	GO:0072711	Cellular response to hydroxyurea	2	13	1.69	0.0277	BLM,ATRX
GO Process	GO:0009749	Response to glucose	4	138	0.97	0.0281	POLG,GATA4,PTEN,PDX1
GO Process	GO:0071495	Cellular response to endogenous stimulus	11	1181	0.48	0.0281	PHOX2B,UBE3A,BMP4,BRIP1,OXTR,ARID1B,BLM,PTEN,AR,BRCA1,WWOX
GO Process	GO:0050767	Regulation of neurogenesis	9	828	0.54	0.0294	PHOX2B,UBE3A,BMP4,EP300,TERT,FOXG1,ASPM,PTEN,PAX6
GO Process	GO:0030858	Positive regulation of epithelial cell differentiation	3	62	1.19	0.0301	BMP4,PAX6,GDNF
GO Process	GO:0045664	Regulation of neuron differentiation	8	665	0.59	0.0301	PHOX2B,UBE3A,BMP4,EP300,FOXG1,ASPM,PTEN,PAX6
GO Process	GO:0014067	Negative regulation of phosphatidylinositol 3-kinase signaling	2	14	1.66	0.0306	TSC2,PTEN
GO Process	GO:0045165	Cell fate commitment	5	248	0.81	0.0309	BMP4,MITF,GATA4,FOXG1,PAX6
GO Process	GO:0009411	Response to uv	4	144	0.95	0.0315	EP300,ATR,BRCA2,ERCC2
GO Process	GO:0030855	Epithelial cell differentiation	8	673	0.58	0.0317	BMP4,GATA4,ATRX,AR,PDX1,ERCC2,PAX6,GDNF
GO Process	GO:0007051	Spindle organization	4	145	0.95	0.0321	VCP,ASPM,ATRX,TBCE
GO Process	GO:0007507	Heart development	7	522	0.63	0.0331	TSC2,BMP4,EP300,ATM,OXTR,GATA4,PTEN
GO Process	GO:0034613	Cellular protein localization	13	1610	0.41	0.0331	TSC2,BMP4,HERC2,TINF2,ATM,TERT,WRAP53,ATR,VCP,ATRX,BRCA2,KIF5C,PAX6
GO Process	GO:0048584	Positive regulation of response to stimulus	16	2257	0.36	0.0331	UBE3A,BMP4,EP300,ATM,TERT,WRAP53,GATA4,EDN3,ATR,VCP,ASPM,PTEN,AR,PDX1,BRCA1,WWOX
GO Process	GO:0044267	Cellular protein metabolic process	22	3696	0.28	0.0332	EEF1A2,UBE3A,BMP4,H3F3B,HERC2,EP300,ATM,BUB1B,OXTR,B3GALTL,ATR,VCP,PTEN,AR,KDM2B,BRCA2,BRPF1,ERCC2,SATB1,GDNF,EHMT1,BRCA1
GO Process	GO:0006268	DNA unwinding involved in DNA replication	2	15	1.63	0.0334	BLM,RECQL4
GO Process	GO:0006978	DNA damage response, signal transduction by p53 class mediator resulting in transcription of p21 class mediator	2	15	1.63	0.0334	BRCA2,BRCA1
GO Process	GO:0021535	Cell migration in hindbrain	2	15	1.63	0.0334	PHOX2B,RERE
GO Process	GO:0048663	Neuron fate commitment	3	66	1.16	0.0341	BMP4,FOXG1,PAX6
GO Process	GO:0051338	Regulation of transferase activity	10	1036	0.49	0.0352	EEF1A2,TSC2,BMP4,NBN,WRAP53,MRE11A,EDN3,BLM,PTEN,ELP4
GO Process	GO:0033993	Response to lipid	9	858	0.53	0.0354	UBE3A,BMP4,ATM,OXTR,GATA4,PTEN,AR,PDX1,BRCA1
GO Process	GO:0071479	Cellular response to ionizing radiation	3	67	1.16	0.0354	ATM,ATR,BLM
GO Process	GO:0001759	Organ induction	2	16	2023-06-01	0.0368	BMP4,GDNF
GO Process	GO:0043517	Positive regulation of dna damage response, signal transduction by p53 class mediator	2	16	2023-06-01	0.0368	ATM,ATR
GO Process	GO:0046649	Lymphocyte activation	6	390	0.69	0.0368	PRDX1,EP300,NBN,ATM,PRF1,SATB1
GO Process	GO:0048762	Mesenchymal cell differentiation	4	152	0.93	0.0368	PHOX2B,BMP4,EDN3,GDNF
GO Process	GO:0060218	Hematopoietic stem cell differentiation	2	16	2023-06-01	0.0368	ERCC2,CHD2
GO Process	GO:1905331	Negative regulation of morphogenesis of an epithelium	2	16	2023-06-01	0.0368	BMP4,PTEN
GO Process	GO:2000573	Positive regulation of dna biosynthetic process	3	70	1.14	0.0390	ATM,WRAP53,ATR
GO Process	GO:0007286	Spermatid development	4	156	0.92	0.0395	H3F3B,BRIP1,OCA2,FANCG
GO Process	GO:0010033	Response to organic substance	19	3011	0.31	0.0395	PHOX2B,UBE3A,BMP4,BRIP1,EP300,POLG,ATM,OXTR,GATA4,ARID1B,BLM,VCP,PTEN,ATRX,AR,PDX1,PAX6,BRCA1,WWOX
GO Process	GO:0031329	Regulation of cellular catabolic process	9	875	0.52	0.0395	EEF1A2,TSC2,UBE3A,EP300,ATM,GATA4,VCP,PTEN,GDNF
GO Process	GO:0000076	DNA replication checkpoint	2	17	1.58	0.0399	DNA2,CDC45
GO Process	GO:0009605	Response to external stimulus	16	2310	0.35	0.0399	TSC2,BMP4,BRIP1,PRDX1,EP300,TUBB3,GATA4,EDN3,FOXG1,PTEN,PDX1,KIF5C,PRF1,SATB1,PAX6,GDNF
GO Process	GO:0009967	Positive regulation of signal transduction	13	1654	0.4	0.0399	UBE3A,BMP4,EP300,ATM,TERT,GATA4,EDN3,ATR,VCP,ASPM,PTEN,AR,WWOX
GO Process	GO:0051782	Negative regulation of cell division	2	17	1.58	0.0399	BLM,ASPM
GO Process	GO:0061548	Ganglion development	2	17	1.58	0.0399	PHOX2B,TUBB3
GO Process	GO:0021915	Neural tube development	4	160	0.9	0.0425	TSC2,BMP4,KDM2B,PAX6
GO Process	GO:1901698	Response to nitrogen compound	10	1070	0.48	0.0425	UBE3A,BRIP1,OXTR,ARID1B,BLM,VCP,PTEN,ATRX,PDX1,BRCA1
GO Process	GO:0006366	Transcription by rna polymerase ii	6	406	0.68	0.0431	PTEN,AR,PDX1,ERCC2,ELP4,PAX6
GO Process	GO:0014821	Phasic smooth muscle contraction	2	18	1.55	0.0434	EDN3,GDNF
GO Process	GO:0007411	Axon guidance	5	275	0.77	0.0438	TUBB3,FOXG1,KIF5C,PAX6,GDNF
GO Process	GO:0048709	Oligodendrocyte differentiation	3	74	2023-11-01	0.0438	PTEN,ERCC2,PAX6
GO Process	GO:0016477	Cell migration	9	896	0.51	0.0447	PHOX2B,EDN3,RERE,FOXG1,ASPM,PTEN,TUBB2A,PAX6,GDNF
GO Process	GO:0072422	Signal transduction involved in dna damage checkpoint	3	75	2023-11-01	0.0451	EP300,ATM,BRCA1
GO Process	GO:0001832	Blastocyst growth	2	19	1.53	0.0466	NBN,BRCA2
GO Process	GO:0014706	Striated muscle tissue development	5	280	0.76	0.0466	PHOX2B,BMP4,EP300,GATA4,PTEN
GO Process	GO:0016579	Protein deubiquitination	5	281	0.76	0.0466	EP300,VCP,PTEN,AR,BRCA1
GO Process	GO:0033143	Regulation of intracellular steroid hormone receptor signaling pathway	3	76	2023-01-01	0.0466	EP300,AR,BRCA1
GO Process	GO:0045596	Negative regulation of cell differentiation	8	728	0.55	0.0466	PHOX2B,UBE3A,BMP4,TERT,FOXG1,ASPM,PTEN,PAX6
GO Process	GO:0048486	Parasympathetic nervous system development	2	19	1.53	0.0466	PHOX2B,GDNF
GO Process	GO:2000241	Regulation of reproductive process	4	166	0.89	0.0466	BMP4,OXTR,ASPM,AR
GO Process	GO:0006351	Transcription, dna-templated	7	567	0.6	0.0469	MITF,PTEN,AR,PDX1,ERCC2,ELP4,PAX6
GO Process	GO:0042327	Positive regulation of phosphorylation	10	1093	0.47	0.0474	EEF1A2,BMP4,NBN,ATM,MRE11A,GATA4,EDN3,VCP,PTEN,AR
GO Process	GO:0065003	Protein-containing complex assembly	11	1293	0.44	0.0491	H3F3B,EP300,MITF,TERT,BLM,ATRX,FANCA,ERCC2,PRF1,CDC45,TBCE
GO Process	GO:0001763	Morphogenesis of a branching structure	4	170	0.88	0.0499	BMP4,RERE,AR,GDNF
GO Process	GO:0002068	Glandular epithelial cell development	2	20	1.51	0.0499	BMP4,PAX6
GO Process	GO:0071478	Cellular response to radiation	4	170	0.88	0.0499	EP300,ATM,ATR,BLM
GO Molecular Function
GO Function	GO:0003677	DNA binding	34	2470	0.64	4.89e-12	PHOX2B,H3F3B,BRIP1,EP300,NBN,TINF2,POLG,ATM,MITF,TERT,FANCI,MRE11A,GATA4,RERE,FOXG1,ATR,ARID1B,BLM,DNA2,ATRX,AR,ZIC2,KDM2B,FANCG,BRCA2,PDX1,BRPF1,ERCC2,CHD2,SATB1,PAX6,CDC45,BRCA1,RECQL4
GO Function	GO:0003676	Nucleic acid binding	38	3947	0.49	1.70e-09	EEF1A2,PHOX2B,H3F3B,BRIP1,PRDX1,EP300,NBN,TINF2,POLG,ATM,MITF,TERT,FANCI,WRAP53,MRE11A,GATA4,RERE,FOXG1,ATR,ARID1B,BLM,DNA2,VCP,ATRX,AR,ZIC2,KDM2B,FANCG,BRCA2,PDX1,BRPF1,ERCC2,CHD2,SATB1,PAX6,CDC45,BRCA1,RECQL4
GO Function	GO:0097159	Organic cyclic compound binding	42	5916	0.36	4.21e-07	EEF1A2,PHOX2B,H3F3B,BRIP1,PRDX1,EP300,NBN,TINF2,POLG,ATM,BUB1B,MITF,TERT,FANCI,TUBB3,WRAP53,MRE11A,GATA4,RERE,FOXG1,ATR,ARID1B,BLM,DNA2,VCP,ATRX,AR,ZIC2,KDM2B,FANCG,BRCA2,TUBB2A,PDX1,BRPF1,ERCC2,CHD2,KIF5C,SATB1,PAX6,CDC45,BRCA1,RECQL4
GO Function	GO:0140097	Catalytic activity, acting on dna	10	184	1.24	4.21e-07	BRIP1,POLG,TERT,MRE11A,BLM,DNA2,ATRX,ERCC2,CHD2,RECQL4
GO Function	GO:1901363	Heterocyclic compound binding	42	5831	0.36	4.21e-07	EEF1A2,PHOX2B,H3F3B,BRIP1,PRDX1,EP300,NBN,TINF2,POLG,ATM,BUB1B,MITF,TERT,FANCI,TUBB3,WRAP53,MRE11A,GATA4,RERE,FOXG1,ATR,ARID1B,BLM,DNA2,VCP,ATRX,AR,ZIC2,KDM2B,FANCG,BRCA2,TUBB2A,PDX1,BRPF1,ERCC2,CHD2,KIF5C,SATB1,PAX6,CDC45,BRCA1,RECQL4
GO Function	GO:0003678	DNA helicase activity	7	63	1.55	1.09e-06	BRIP1,BLM,DNA2,ATRX,ERCC2,CHD2,RECQL4
GO Function	GO:0003684	Damaged dna binding	7	64	1.55	1.09e-06	EP300,NBN,BLM,FANCG,ERCC2,BRCA1,RECQL4
GO Function	GO:0043565	Sequence-specific dna binding	19	1331	0.66	5.35e-06	PHOX2B,H3F3B,EP300,TINF2,MITF,TERT,GATA4,RERE,FOXG1,BLM,AR,ZIC2,KDM2B,PDX1,CHD2,SATB1,PAX6,CDC45,BRCA1
GO Function	GO:0003682	Chromatin binding	13	570	0.86	7.84e-06	H3F3B,BRIP1,EP300,POLG,MITF,RERE,ATRX,AR,ZIC2,PDX1,SATB1,PAX6,CDC45
GO Function	GO:0003690	Double-stranded dna binding	15	1156	0.62	0.00056	PHOX2B,H3F3B,EP300,MITF,MRE11A,GATA4,AR,ZIC2,KDM2B,PDX1,CHD2,SATB1,PAX6,CDC45,BRCA1
GO Function	GO:0005488	Binding	55	12516	0.15	0.00081	EEF1A2,TSC2,PHOX2B,UBE3A,BMP4,H3F3B,BRIP1,HERC2,PRDX1,EP300,NBN,TINF2,POLG,ATM,BUB1B,MITF,TERT,FANCI,TUBB3,WRAP53,OXTR,MRE11A,GATA4,EDN3,RERE,FOXG1,ATR,ARID1B,BLM,DNA2,VCP,ASPM,PTEN,ATRX,AR,ZIC2,KDM2B,FANCG,BRCA2,TUBB2A,PDX1,BRPF1,ERCC2,CHD2,KIF5C,PRF1,SATB1,PAX6,CDC45,GDNF,EHMT1,BRCA1,TBCE,WWOX,RECQL4
GO Function	GO:0016887	ATPase activity	9	393	0.87	0.00086	BRIP1,BLM,DNA2,VCP,ATRX,ERCC2,CHD2,KIF5C,RECQL4
GO Function	GO:0017111	Nucleoside-triphosphatase activity	12	760	0.7	0.00086	EEF1A2,BRIP1,TUBB3,BLM,DNA2,VCP,ATRX,TUBB2A,ERCC2,CHD2,KIF5C,RECQL4
GO Function	GO:1990837	Sequence-specific double-stranded dna binding	14	1068	0.62	0.00088	PHOX2B,H3F3B,EP300,MITF,GATA4,AR,ZIC2,KDM2B,PDX1,CHD2,SATB1,PAX6,CDC45,BRCA1
GO Function	GO:0000976	Transcription regulatory region sequence-specific dna binding	13	1028	0.61	0.0024	PHOX2B,H3F3B,EP300,MITF,GATA4,AR,ZIC2,KDM2B,PDX1,CHD2,SATB1,PAX6,BRCA1
GO Function	GO:0000977	RNA polymerase II transcription regulatory region sequence-specific DNA binding	12	878	0.64	0.0024	PHOX2B,H3F3B,EP300,MITF,GATA4,AR,ZIC2,KDM2B,PDX1,CHD2,SATB1,PAX6
GO Function	GO:0001085	RNA polymerase II transcription factor binding	4	56	1.36	0.0051	EP300,GATA4,RERE,AR
GO Function	GO:0000978	RNA polymerase II cis-regulatory region sequence-specific DNA binding	10	672	0.68	0.0059	PHOX2B,H3F3B,EP300,MITF,GATA4,AR,KDM2B,PDX1,CHD2,PAX6
GO Function	GO:0003713	Transcription coactivator activity	7	316	0.85	0.0080	UBE3A,EP300,GATA4,RERE,ARID1B,BRCA1,WWOX
GO Function	GO:0005515	Protein binding	37	7026	0.23	0.0090	EEF1A2,TSC2,BMP4,H3F3B,HERC2,PRDX1,EP300,NBN,POLG,ATM,MITF,TERT,FANCI,TUBB3,WRAP53,MRE11A,GATA4,EDN3,RERE,BLM,VCP,ASPM,PTEN,ATRX,AR,BRCA2,PDX1,ERCC2,CHD2,KIF5C,PRF1,PAX6,GDNF,EHMT1,BRCA1,TBCE,WWOX
GO Function	GO:0061821	Telomeric d-loop binding	2	4	2.21	0.0161	BLM,RECQL4
GO Function	GO:0140110	Transcription regulator activity	15	1657	0.46	0.0161	PHOX2B,UBE3A,EP300,MITF,GATA4,RERE,FOXG1,ARID1B,AR,ZIC2,PDX1,SATB1,PAX6,BRCA1,WWOX
GO Function	GO:0008134	Transcription factor binding	9	672	0.63	0.0249	EP300,NBN,TERT,GATA4,RERE,AR,PDX1,PAX6,BRCA1
GO Function	GO:0042162	Telomeric dna binding	3	36	1.43	0.0249	TINF2,TERT,BLM
GO Function	GO:0009378	Four-way junction helicase activity	2	6	2023-03-02	0.0258	BLM,RECQL4
GO Function	GO:0032357	Oxidized purine dna binding	2	7	1.96	0.0321	BLM,RECQL4
GO Function	GO:0035639	Purine ribonucleoside triphosphate binding	15	1799	0.43	0.0321	EEF1A2,BRIP1,ATM,BUB1B,TUBB3,ATR,BLM,DNA2,VCP,ATRX,TUBB2A,ERCC2,CHD2,KIF5C,RECQL4
GO Function	GO:0036310	Annealing helicase activity	2	7	1.96	0.0321	BLM,RECQL4
GO Function	GO:0051539	4 iron, 4 sulfur cluster binding	3	42	1.36	0.0323	BRIP1,DNA2,ERCC2
GO Function	GO:0000405	Bubble dna binding	2	8	2023-09-01	0.0358	BLM,RECQL4
GO Function	GO:0008022	Protein c-terminus binding	5	199	0.91	0.0358	EP300,TERT,MRE11A,BRCA2,ERCC2
GO Function	GO:0043139	5-3 DNA helicase activity	2	8	2023-09-01	0.0358	DNA2,ERCC2
GO Function	GO:0047485	Protein n-terminus binding	4	110	2023-07-01	0.0358	NBN,ATM,TERT,ERCC2
GO Function	GO:0098772	Molecular function regulator	22	3422	0.31	0.0358	TSC2,PHOX2B,UBE3A,BMP4,HERC2,EP300,MITF,GATA4,EDN3,RERE,FOXG1,ARID1B,VCP,AR,ZIC2,PDX1,ELP4,SATB1,PAX6,GDNF,BRCA1,WWOX
GO Function	GO:0032555	Purine ribonucleotide binding	15	1864	0.41	0.0365	EEF1A2,BRIP1,ATM,BUB1B,TUBB3,ATR,BLM,DNA2,VCP,ATRX,TUBB2A,ERCC2,CHD2,KIF5C,RECQL4
GO Function	GO:0043138	3-5 DNA helicase activity	2	10	1.81	0.0423	BLM,RECQL4
GO Function	GO:0070410	co-SMAD binding	2	11	1.77	0.0489	GATA4,PAX6
GO Cellular Component
GO Component	GO:0005654	Nucleoplasm	42	3973	0.53	7.29e-13	PHOX2B,FANCE,H3F3B,BRIP1,HERC2,EP300,NBN,TINF2,ATM,MITF,TERT,FANCI,WRAP53,MRE11A,FANCF,GATA4,RERE,FOXG1,ATR,ARID1B,BLM,DNA2,VCP,PTEN,ATRX,AR,ZIC2,KDM2B,FANCG,BRCA2,PDX1,BRPF1,FANCA,ERCC2,CHD2,ELP4,SATB1,PAX6,CDC45,EHMT1,BRCA1,WWOX
GO Component	GO:0005694	Chromosome	29	1712	0.74	2.76e-12	PHOX2B,H3F3B,EP300,NBN,TINF2,BUB1B,MITF,TERT,WRAP53,MRE11A,GATA4,FOXG1,ATR,ARID1B,BLM,DNA2,VCP,ATRX,AR,KDM2B,BRCA2,PDX1,BRPF1,SATB1,PAX6,CDC45,EHMT1,BRCA1,RECQL4
GO Component	GO:0031981	Nuclear lumen	43	4733	0.46	2.05e-11	PHOX2B,FANCE,H3F3B,BRIP1,HERC2,EP300,NBN,TINF2,ATM,BUB1B,MITF,TERT,FANCI,WRAP53,MRE11A,FANCF,GATA4,RERE,FOXG1,ATR,ARID1B,BLM,DNA2,VCP,PTEN,ATRX,AR,ZIC2,KDM2B,FANCG,BRCA2,PDX1,BRPF1,FANCA,ERCC2,CHD2,ELP4,SATB1,PAX6,CDC45,EHMT1,BRCA1,WWOX
GO Component	GO:0070013	Intracellular organelle lumen	46	5857	0.4	1.47e-10	PHOX2B,FANCE,BMP4,H3F3B,BRIP1,HERC2,EP300,NBN,TINF2,POLG,ATM,BUB1B,MITF,TERT,FANCI,WRAP53,MRE11A,FANCF,GATA4,RERE,FOXG1,ATR,ARID1B,BLM,DNA2,VCP,PTEN,ATRX,AR,ZIC2,KDM2B,FANCG,BRCA2,PDX1,BRPF1,FANCA,ERCC2,CHD2,ELP4,PRF1,SATB1,PAX6,CDC45,EHMT1,BRCA1,WWOX
GO Component	GO:0005634	Nucleus	50	7390	0.34	4.93e-10	TSC2,PHOX2B,FANCE,UBE3A,H3F3B,BRIP1,HERC2,PRDX1,EP300,NBN,TINF2,ATM,BUB1B,MITF,TERT,FANCI,TUBB3,WRAP53,MRE11A,FANCF,GATA4,RERE,FOXG1,ATR,ARID1B,BLM,DNA2,VCP,ASPM,PTEN,ATRX,AR,ZIC2,KDM2B,FANCG,BRCA2,TUBB2A,PDX1,BRPF1,FANCA,ERCC2,CHD2,ELP4,SATB1,PAX6,CDC45,EHMT1,BRCA1,WWOX,RECQL4
GO Component	GO:0000781	Chromosome, telomeric region	10	134	1.38	4.59e-09	H3F3B,NBN,TINF2,TERT,WRAP53,MRE11A,DNA2,ATRX,BRCA2,RECQL4
GO Component	GO:0043232	Intracellular non-membrane-bounded organelle	40	4880	0.42	5.48e-09	PHOX2B,H3F3B,HERC2,EP300,NBN,TINF2,POLG,ATM,BUB1B,MITF,TERT,TUBB3,WRAP53,MRE11A,GATA4,FOXG1,ATR,ARID1B,BLM,DNA2,VCP,ASPM,ATRX,AR,KDM2B,FANCG,BRCA2,TUBB2A,PDX1,BRPF1,ERCC2,CHD2,KIF5C,SATB1,PAX6,CDC45,EHMT1,BRCA1,TBCE,RECQL4
GO Component	GO:0000228	Nuclear chromosome	21	1256	0.73	1.56e-08	PHOX2B,H3F3B,NBN,TINF2,BUB1B,MITF,TERT,MRE11A,GATA4,FOXG1,ARID1B,BLM,DNA2,ATRX,AR,BRCA2,PDX1,SATB1,PAX6,CDC45,BRCA1
GO Component	GO:0043231	Intracellular membrane-bounded organelle	56	10761	0.22	5.28e-08	EEF1A2,TSC2,PHOX2B,FANCE,UBE3A,BMP4,H3F3B,BRIP1,HERC2,PRDX1,EP300,NBN,TINF2,POLG,ATM,BUB1B,MITF,TERT,FANCI,TUBB3,WRAP53,MRE11A,FANCF,GATA4,RERE,FOXG1,ATR,ARID1B,OCA2,BLM,DNA2,VCP,ASPM,PTEN,ATRX,AR,ZIC2,KDM2B,FANCG,BRCA2,TUBB2A,PDX1,BRPF1,FANCA,ERCC2,CHD2,ELP4,PRF1,SATB1,PAX6,CDC45,GDNF,EHMT1,BRCA1,WWOX,RECQL4
GO Component	GO:0000784	Nuclear chromosome, telomeric region	8	102	2023-04-01	2.10e-07	H3F3B,NBN,TINF2,TERT,MRE11A,DNA2,ATRX,BRCA2
GO Component	GO:0016605	PML body	8	101	2023-04-01	2.10e-07	NBN,TERT,MRE11A,ATR,BLM,PTEN,ATRX,SATB1
GO Component	GO:0016604	Nuclear body	16	789	0.81	2.25e-07	NBN,TINF2,TERT,WRAP53,MRE11A,GATA4,ATR,BLM,PTEN,ATRX,AR,ZIC2,PDX1,SATB1,EHMT1,BRCA1
GO Component	GO:0098687	Chromosomal region	11	318	2023-05-01	5.23e-07	H3F3B,NBN,TINF2,BUB1B,TERT,WRAP53,MRE11A,DNA2,ATRX,BRCA2,RECQL4
GO Component	GO:0043229	Intracellular organelle	58	12528	0.17	1.13e-06	EEF1A2,TSC2,PHOX2B,FANCE,UBE3A,BMP4,H3F3B,BRIP1,HERC2,PRDX1,EP300,NBN,TINF2,POLG,ATM,BUB1B,MITF,TERT,FANCI,TUBB3,WRAP53,MRE11A,FANCF,GATA4,RERE,FOXG1,ATR,ARID1B,OCA2,BLM,DNA2,VCP,ASPM,PTEN,ATRX,AR,ZIC2,KDM2B,FANCG,BRCA2,TUBB2A,PDX1,BRPF1,FANCA,ERCC2,CHD2,ELP4,KIF5C,PRF1,SATB1,PAX6,CDC45,GDNF,EHMT1,BRCA1,TBCE,WWOX,RECQL4
GO Component	GO:0043226	Organelle	59	13515	0.15	5.95e-06	EEF1A2,TSC2,PHOX2B,FANCE,UBE3A,BMP4,H3F3B,BRIP1,HERC2,PRDX1,EP300,NBN,TINF2,POLG,ATM,BUB1B,MITF,TERT,FANCI,TUBB3,WRAP53,MRE11A,FANCF,GATA4,RERE,FOXG1,B3GALTL,ATR,ARID1B,OCA2,BLM,DNA2,VCP,ASPM,PTEN,ATRX,AR,ZIC2,KDM2B,FANCG,BRCA2,TUBB2A,PDX1,BRPF1,FANCA,ERCC2,CHD2,ELP4,KIF5C,PRF1,SATB1,PAX6,CDC45,GDNF,EHMT1,BRCA1,TBCE,WWOX,RECQL4
GO Component	GO:0043227	Membrane-bounded organelle	57	12427	0.17	5.95e-06	EEF1A2,TSC2,PHOX2B,FANCE,UBE3A,BMP4,H3F3B,BRIP1,HERC2,PRDX1,EP300,NBN,TINF2,POLG,ATM,BUB1B,MITF,TERT,FANCI,TUBB3,WRAP53,MRE11A,FANCF,GATA4,RERE,FOXG1,B3GALTL,ATR,ARID1B,OCA2,BLM,DNA2,VCP,ASPM,PTEN,ATRX,AR,ZIC2,KDM2B,FANCG,BRCA2,TUBB2A,PDX1,BRPF1,FANCA,ERCC2,CHD2,ELP4,PRF1,SATB1,PAX6,CDC45,GDNF,EHMT1,BRCA1,WWOX,RECQL4
GO Component	GO:0043240	Fanconi anaemia nuclear complex	4	13	1.99	1.66e-05	FANCE,FANCF,FANCG,FANCA
GO Component	GO:0032991	Protein-containing complex	32	5073	0.31	0.00076	EEF1A2,TSC2,FANCE,UBE3A,H3F3B,EP300,NBN,TINF2,POLG,ATM,BUB1B,MITF,TERT,WRAP53,MRE11A,FANCF,GATA4,RERE,ARID1B,BLM,VCP,AR,FANCG,BRCA2,BRPF1,FANCA,ERCC2,ELP4,KIF5C,CDC45,BRCA1,WWOX
GO Component	GO:0000800	Lateral element	3	14	1.84	0.0014	BLM,BRCA2,BRCA1
GO Component	GO:0000794	Condensed nuclear chromosome	5	103	1.19	0.0015	BUB1B,BLM,ATRX,BRCA2,BRCA1
GO Component	GO:0035861	Site of double-strand break	4	60	1.33	0.0032	NBN,WRAP53,MRE11A,VCP
GO Component	GO:0005657	Replication fork	4	64	2023-03-01	0.0039	NBN,MRE11A,BLM,CDC45
GO Component	GO:0030870	Mre11 complex	2	3	2.33	0.0059	NBN,MRE11A
GO Component	GO:0099115	Chromosome, subtelomeric region	2	4	2.21	0.0086	H3F3B,ATRX
GO Component	GO:0000790	Nuclear chromatin	11	1048	0.53	0.0196	PHOX2B,H3F3B,MITF,GATA4,FOXG1,ARID1B,ATRX,AR,PDX1,SATB1,PAX6
GO Component	GO:0015630	Microtubule cytoskeleton	12	1219	0.5	0.0196	HERC2,ATM,BUB1B,TUBB3,ASPM,BRCA2,TUBB2A,ERCC2,KIF5C,CDC45,BRCA1,TBCE
GO Component	GO:0032993	protein-DNA complex	5	195	0.92	0.0196	H3F3B,EP300,TINF2,TERT,CDC45
GO Component	GO:0042645	Mitochondrial nucleoid	3	44	1.34	0.0204	POLG,TERT,DNA2
GO Component	GO:0000783	Nuclear telomere cap complex	2	13	1.69	0.0435	TINF2,TERT
Reactome
Reactome	HSA-73894	DNA Repair	19	309	1.29	3.51e-16	FANCE,BRIP1,HERC2,EP300,NBN,TINF2,ATM,FANCI,MRE11A,FANCF,ATR,BLM,DNA2,VCP,FANCG,BRCA2,FANCA,ERCC2,BRCA1
Reactome	HSA-1640170	Cell Cycle	20	647	1.0	5.85e-12	H3F3B,BRIP1,HERC2,EP300,NBN,TINF2,ATM,BUB1B,TERT,TUBB3,WRAP53,MRE11A,ATR,BLM,DNA2,ATRX,BRCA2,TUBB2A,CDC45,BRCA1
Reactome	HSA-5693616	Presynaptic phase of homologous DNA pairing and strand exchange	9	38	1.88	1.31e-11	BRIP1,NBN,ATM,MRE11A,ATR,BLM,DNA2,BRCA2,BRCA1
Reactome	HSA-3700989	Transcriptional Regulation by TP53	16	363	1.15	1.36e-11	TSC2,BRIP1,PRDX1,EP300,NBN,ATM,FANCI,MRE11A,ATR,BLM,DNA2,PTEN,BRPF1,ERCC2,EHMT1,BRCA1
Reactome	HSA-5693554	Resolution of D-loop Structures through Synthesis-Dependent Strand Annealing (SDSA)	8	25	2023-01-02	2.56e-11	BRIP1,NBN,ATM,MRE11A,BLM,DNA2,BRCA2,BRCA1
Reactome	HSA-5693568	Resolution of D-loop Structures through Holliday Junction Intermediates	8	31	1.92	9.57e-11	BRIP1,NBN,ATM,MRE11A,BLM,DNA2,BRCA2,BRCA1
Reactome	HSA-5685938	HDR through Single Strand Annealing (SSA)	8	36	1.85	2.12e-10	BRIP1,NBN,ATM,MRE11A,ATR,BLM,DNA2,BRCA1
Reactome	HSA-212436	Generic Transcription Pathway	22	1197	0.77	8.44e-10	TSC2,H3F3B,BRIP1,PRDX1,EP300,NBN,ATM,FANCI,MRE11A,GATA4,FOXG1,ATR,ARID1B,BLM,DNA2,PTEN,AR,BRPF1,ERCC2,EHMT1,BRCA1,WWOX
Reactome	HSA-5633007	Regulation of TP53 Activity	11	159	1.35	8.44e-10	BRIP1,EP300,NBN,ATM,MRE11A,ATR,BLM,DNA2,BRPF1,EHMT1,BRCA1
Reactome	HSA-5693567	HDR through Homologous Recombination (HRR) or Single Strand Annealing (SSA)	10	113	1.45	8.44e-10	BRIP1,HERC2,NBN,ATM,MRE11A,ATR,BLM,DNA2,BRCA2,BRCA1
Reactome	HSA-69473	G2/M DNA damage checkpoint	9	78	1.57	9.63e-10	BRIP1,HERC2,NBN,ATM,MRE11A,ATR,BLM,DNA2,BRCA1
Reactome	HSA-5693607	Processing of DNA double-strand break ends	9	81	1.55	1.15e-09	BRIP1,HERC2,NBN,ATM,MRE11A,ATR,BLM,DNA2,BRCA1
Reactome	HSA-1500620	Meiosis	9	87	1.52	1.96e-09	H3F3B,NBN,TINF2,ATM,MRE11A,ATR,BLM,BRCA2,BRCA1
Reactome	HSA-69481	G2/M Checkpoints	10	149	1.33	6.29e-09	BRIP1,HERC2,NBN,ATM,MRE11A,ATR,BLM,DNA2,CDC45,BRCA1
Reactome	HSA-6804756	Regulation of TP53 Activity through Phosphorylation	8	92	1.45	7.60e-08	BRIP1,NBN,ATM,MRE11A,ATR,BLM,DNA2,BRCA1
Reactome	HSA-912446	Meiotic recombination	7	55	1.61	7.65e-08	H3F3B,NBN,ATM,MRE11A,BLM,BRCA2,BRCA1
Reactome	HSA-69620	Cell Cycle Checkpoints	11	269	2023-12-01	7.91e-08	BRIP1,HERC2,NBN,ATM,BUB1B,MRE11A,ATR,BLM,DNA2,CDC45,BRCA1
Reactome	HSA-6783310	Fanconi Anemia Pathway	6	37	1.72	3.26e-07	FANCE,FANCI,FANCF,ATR,FANCG,FANCA
Reactome	HSA-2262752	Cellular responses to stress	13	544	0.88	1.02e-06	H3F3B,PRDX1,EP300,NBN,TINF2,ATM,TUBB3,MRE11A,ATR,VCP,AR,TUBB2A,EHMT1
Reactome	HSA-157579	Telomere Maintenance	7	92	1.39	1.75e-06	H3F3B,TINF2,TERT,WRAP53,BLM,DNA2,ATRX
Reactome	HSA-180786	Extension of Telomeres	5	50	1.51	5.31e-05	TINF2,TERT,WRAP53,BLM,DNA2
Reactome	HSA-5693571	Nonhomologous End-Joining (NHEJ)	5	52	1.49	6.16e-05	HERC2,NBN,ATM,MRE11A,BRCA1
Reactome	HSA-3108232	SUMO E3 ligases SUMOylate target proteins	7	166	1.13	7.04e-05	HERC2,EP300,MITF,BLM,AR,SATB1,BRCA1
Reactome	HSA-392499	Metabolism of proteins	20	1977	0.51	8.40e-05	EEF1A2,BMP4,H3F3B,HERC2,EP300,MITF,TUBB3,WRAP53,GATA4,B3GALTL,BLM,VCP,PTEN,AR,TUBB2A,KIF5C,SATB1,PAX6,BRCA1,TBCE
Reactome	HSA-5693565	Recruitment and ATM-mediated phosphorylation of repair and signaling proteins at DNA double strand breaks	5	60	1.43	0.00011	HERC2,NBN,ATM,MRE11A,BRCA1
Reactome	HSA-5693548	Sensing of DNA Double Strand Breaks	3	6	2.21	0.00014	NBN,ATM,MRE11A
Reactome	HSA-6796648	TP53 Regulates Transcription of DNA Repair Genes	5	65	1.39	0.00014	ATM,FANCI,ATR,ERCC2,BRCA1
Reactome	HSA-2559583	Cellular Senescence	6	164	2023-07-01	0.00079	H3F3B,NBN,TINF2,ATM,MRE11A,EHMT1
Reactome	HSA-174414	Processive synthesis on the C-strand of the telomere	3	19	2023-07-01	0.0022	TINF2,BLM,DNA2
Reactome	HSA-6804760	Regulation of TP53 Activity through Methylation	3	19	2023-07-01	0.0022	EP300,ATM,EHMT1
Reactome	HSA-2559586	DNA Damage/Telomere Stress Induced Senescence	4	61	1.32	0.0025	NBN,TINF2,ATM,MRE11A
Reactome	HSA-389977	Post-chaperonin tubulin folding pathway	3	21	1.66	0.0027	TUBB3,TUBB2A,TBCE
Reactome	HSA-171319	Telomere Extension By Telomerase	3	22	1.64	0.0030	TINF2,TERT,WRAP53
Reactome	HSA-1632852	Macroautophagy	5	133	2023-08-01	0.0033	TSC2,ATM,TUBB3,VCP,TUBB2A
Reactome	HSA-3247509	Chromatin modifying enzymes	6	237	0.91	0.0049	EP300,ARID1B,KDM2B,BRPF1,ELP4,EHMT1
Reactome	HSA-9663891	Selective autophagy	4	80	1.21	0.0059	ATM,TUBB3,VCP,TUBB2A
Reactome	HSA-3371556	Cellular response to heat stress	4	89	1.16	0.0085	EP300,ATM,ATR,VCP
Reactome	HSA-391251	Protein folding	4	100	2023-11-01	0.0126	TUBB3,WRAP53,TUBB2A,TBCE
Reactome	HSA-597592	Post-translational protein modification	13	1390	0.48	0.0126	BMP4,HERC2,EP300,MITF,TUBB3,B3GALTL,BLM,VCP,PTEN,AR,TUBB2A,SATB1,BRCA1
Reactome	HSA-186712	Regulation of beta-cell development	3	42	1.36	0.0146	EP300,PDX1,PAX6
Reactome	HSA-9646399	Aggrephagy	3	42	1.36	0.0146	TUBB3,VCP,TUBB2A
Reactome	HSA-9670095	Inhibition of DNA recombination at telomere	3	48	2023-03-01	0.0204	H3F3B,TINF2,ATRX
Reactome	HSA-5685939	HDR through MMEJ (alt-NHEJ)	2	10	1.81	0.0230	NBN,MRE11A
Reactome	HSA-3371497	HSP90 chaperone cycle for steroid hormone receptors (SHR)	3	54	1.25	0.0273	TUBB3,AR,TUBB2A
Reactome	HSA-8866907	Activation of the TFAP2 (AP-2) family of transcription factors	2	12	1.73	0.0306	EP300,WWOX
Reactome	HSA-1221632	Meiotic synapsis	3	60	1.21	0.0346	TINF2,ATR,BRCA1
Reactome	HSA-201722	Formation of the beta-catenin:TCF transactivating complex	3	60	1.21	0.0346	H3F3B,EP300,TERT
Reactome	HSA-2564830	Cytosolic iron-sulfur cluster assembly	2	13	1.69	0.0346	BRIP1,ERCC2
Reactome	HSA-400511	Synthesis, secretion, and inactivation of Glucose-dependent Insulinotropic Polypeptide (GIP)	2	13	1.69	0.0346	GATA4,PAX6
Reactome	HSA-69278	Cell Cycle, Mitotic	7	518	0.64	0.0394	H3F3B,EP300,BUB1B,TUBB3,DNA2,TUBB2A,CDC45
Reactome	HSA-983231	Factors involved in megakaryocyte development and platelet production	4	154	0.92	0.0486	H3F3B,TUBB3,GATA4,TUBB2A

## Sheet: Enrichment subnetwork2
#category	term ID	term description	observed gene count	background gene count	strength	false discovery rate	matching proteins in your network (labels)
GO Biological Process
GO Process	GO:0060271	Cilium assembly	20	339	1.49	1.63e-21	MKKS,BBS7,IQCB1,TMEM107,BBS1,CEP63,OFD1,KIAA0586,AHI1,RPGRIP1L,MKS1,CEP83,DYNC2H1,C5orf42,TMEM67,CC2D2A,IFT74,HYLS1,CEP290,TTC8
GO Process	GO:0070925	Organelle assembly	22	735	2023-02-01	8.39e-19	MKKS,BBS7,IQCB1,TMEM107,BBS1,CEP63,OFD1,KIAA0586,KIAA0753,AHI1,RPGRIP1L,MKS1,CEP83,DYNC2H1,MYO7A,C5orf42,TMEM67,CC2D2A,IFT74,HYLS1,CEP290,TTC8
GO Process	GO:0120036	Plasma membrane bounded cell projection organization	24	1122	2023-05-01	7.39e-18	MKKS,BBS7,IQCB1,TMEM107,BBS1,CEP63,OFD1,KIAA0586,AHI1,RPGRIP1L,MKS1,GLI3,CEP83,DYNC2H1,CDH23,MYO7A,C5orf42,TMEM67,CC2D2A,IFT74,TRIM32,HYLS1,CEP290,TTC8
GO Process	GO:0007601	Visual perception	14	220	1.53	6.20e-15	IMPG2,MKKS,CNGB1,GUCY2D,BBS7,USH2A,BBS1,ABCA4,CDH23,MYO7A,BEST1,PDE6B,EYS,RDH12
GO Process	GO:1905515	Non-motile cilium assembly	10	45	2023-07-02	6.20e-15	MKKS,BBS7,TMEM107,BBS1,RPGRIP1L,MKS1,DYNC2H1,CC2D2A,IFT74,TTC8
GO Process	GO:0097711	Ciliary basal body-plasma membrane docking	10	95	1.75	4.52e-12	IQCB1,CEP63,OFD1,AHI1,RPGRIP1L,MKS1,CEP83,TMEM67,CC2D2A,CEP290
GO Process	GO:0045494	Photoreceptor cell maintenance	8	41	2023-01-02	3.27e-11	MKKS,CNGB1,USH2A,IQCB1,BBS1,ABCA4,CDH23,RDH12
GO Process	GO:0022607	Cellular component assembly	23	2359	0.71	8.74e-10	MKKS,BBS7,IQCB1,TMEM107,BBS1,CEP63,OFD1,KIAA0586,KIAA0753,AHI1,RPGRIP1L,MKS1,CEP83,DYNC2H1,CDH23,MYO7A,C5orf42,TMEM67,CC2D2A,IFT74,HYLS1,CEP290,TTC8
GO Process	GO:0007368	Determination of left/right symmetry	9	120	2023-06-01	1.49e-09	MKKS,BBS7,OFD1,AHI1,RPGRIP1L,MKS1,DYNC2H1,CC2D2A,IFT74
GO Process	GO:0001894	Tissue homeostasis	10	219	1.38	6.29e-09	MKKS,CNGB1,USH2A,IQCB1,BBS1,ABCA4,MKS1,CDH23,TRIM32,RDH12
GO Process	GO:0007389	Pattern specification process	12	432	1.17	1.02e-08	MKKS,BBS7,TMEM107,OFD1,AHI1,RPGRIP1L,MKS1,GLI3,DYNC2H1,CC2D2A,IFT74,TTC8
GO Process	GO:0051640	Organelle localization	13	598	2023-06-01	2.31e-08	MKKS,BBS7,IQCB1,CEP63,OFD1,AHI1,RPGRIP1L,MKS1,CEP83,MYO7A,TMEM67,CC2D2A,CEP290
GO Process	GO:0007600	Sensory perception	15	923	0.93	2.63e-08	IMPG2,MKKS,CNGB1,GUCY2D,BBS7,USH2A,BBS1,ABCA4,CDH23,MYO7A,BEST1,PDE6B,EYS,RDH12,TTC8
GO Process	GO:0007423	Sensory organ development	12	563	2023-05-01	1.76e-07	BBS7,MERTK,USH2A,AHI1,RPGRIP1L,MKS1,GLI3,CDH23,MYO7A,CC2D2A,PDE6B,CEP290
GO Process	GO:0048598	Embryonic morphogenesis	12	571	2023-05-01	1.99e-07	MKKS,BBS7,TMEM107,AHI1,RPGRIP1L,MKS1,GLI3,DYNC2H1,MYO7A,C5orf42,CC2D2A,CEP290
GO Process	GO:0006996	Organelle organization	23	3450	0.55	9.93e-07	MKKS,BBS7,IQCB1,TMEM107,BBS1,CEP63,OFD1,KIAA0586,KIAA0753,AHI1,RPGRIP1L,MKS1,CEP83,DYNC2H1,MYO7A,C5orf42,TMEM67,CC2D2A,IFT74,TRIM32,HYLS1,CEP290,TTC8
GO Process	GO:0048839	Inner ear development	8	198	1.33	1.65e-06	USH2A,AHI1,RPGRIP1L,MKS1,GLI3,CDH23,MYO7A,CEP290
GO Process	GO:0007224	Smoothened signaling pathway	6	72	1.64	2.77e-06	BBS7,EVC2,KIAA0586,MKS1,GLI3,CC2D2A
GO Process	GO:0060429	Epithelium development	14	1109	0.82	2.77e-06	MKKS,BBS7,USH2A,TMEM107,CEP63,AHI1,RPGRIP1L,MKS1,GLI3,MYO7A,C5orf42,CC2D2A,IFT74,CEP290
GO Process	GO:0016043	Cellular component organization	27	5447	0.42	5.95e-06	MKKS,CNGB1,BBS7,IQCB1,TMEM107,BBS1,CEP63,OFD1,KIAA0586,KIAA0753,AHI1,ABCA4,RPGRIP1L,MKS1,GLI3,CEP83,DYNC2H1,CDH23,MYO7A,C5orf42,TMEM67,CC2D2A,IFT74,TRIM32,HYLS1,CEP290,TTC8
GO Process	GO:0001654	Eye development	9	365	2023-12-01	8.43e-06	BBS7,MERTK,AHI1,RPGRIP1L,GLI3,MYO7A,CC2D2A,PDE6B,CEP290
GO Process	GO:0051179	Localization	27	5591	0.41	9.79e-06	MKKS,CNGB1,BBS7,MERTK,USH2A,IQCB1,TMEM107,BBS1,CEP63,OFD1,KIAA0753,AHI1,ABCA4,RPGRIP1L,MKS1,GLI3,CEP83,DYNC2H1,CDH23,MYO7A,C5orf42,TMEM67,BEST1,CC2D2A,IFT74,CEP290,TTC8
GO Process	GO:0007507	Heart development	10	522	2023-01-01	1.14e-05	MKKS,BBS7,AHI1,RPGRIP1L,MKS1,GLI3,DYNC2H1,C5orf42,CC2D2A,IFT74
GO Process	GO:0009584	Detection of visible light	5	48	1.74	1.49e-05	CNGB1,ABCA4,BEST1,PDE6B,EYS
GO Process	GO:0051641	Cellular localization	20	2967	0.55	1.49e-05	MKKS,CNGB1,BBS7,IQCB1,TMEM107,BBS1,CEP63,OFD1,KIAA0753,AHI1,RPGRIP1L,MKS1,CEP83,DYNC2H1,MYO7A,C5orf42,TMEM67,CC2D2A,IFT74,CEP290
GO Process	GO:0060173	Limb development	7	181	1.31	1.57e-05	BBS7,TMEM107,RPGRIP1L,MKS1,GLI3,DYNC2H1,C5orf42
GO Process	GO:0061512	Protein localization to cilium	5	51	1.71	1.80e-05	TMEM107,BBS1,DYNC2H1,C5orf42,CC2D2A
GO Process	GO:0002009	Morphogenesis of an epithelium	9	435	2023-04-01	2.80e-05	MKKS,BBS7,AHI1,RPGRIP1L,MKS1,GLI3,C5orf42,CC2D2A,CEP290
GO Process	GO:0032501	Multicellular organismal process	29	6933	0.34	3.22e-05	IMPG2,MKKS,CNGB1,GUCY2D,BBS7,MERTK,USH2A,IQCB1,TMEM107,BBS1,OFD1,AHI1,ABCA4,RPGRIP1L,MKS1,GLI3,DYNC2H1,CDH23,MYO7A,C5orf42,BEST1,CC2D2A,IFT74,TRIM32,PDE6B,EYS,CEP290,RDH12,TTC8
GO Process	GO:0030326	Embryonic limb morphogenesis	6	127	2023-04-01	4.38e-05	TMEM107,RPGRIP1L,MKS1,GLI3,DYNC2H1,C5orf42
GO Process	GO:0009581	Detection of external stimulus	6	131	1.38	4.92e-05	MKKS,CNGB1,ABCA4,BEST1,PDE6B,EYS
GO Process	GO:0009582	Detection of abiotic stimulus	6	133	1.38	5.26e-05	MKKS,CNGB1,ABCA4,BEST1,PDE6B,EYS
GO Process	GO:0009888	Tissue development	15	1760	0.65	6.79e-05	MKKS,BBS7,USH2A,TMEM107,CEP63,AHI1,RPGRIP1L,MKS1,GLI3,MYO7A,C5orf42,CC2D2A,IFT74,EYS,CEP290
GO Process	GO:0007399	Nervous system development	17	2371	0.58	8.85e-05	MKKS,CNGB1,BBS7,MERTK,USH2A,TMEM107,AHI1,RPGRIP1L,MKS1,GLI3,DYNC2H1,CDH23,MYO7A,C5orf42,CC2D2A,TRIM32,CEP290
GO Process	GO:0009653	Anatomical structure morphogenesis	16	2165	0.59	0.00015	MKKS,BBS7,MERTK,USH2A,TMEM107,AHI1,RPGRIP1L,MKS1,GLI3,DYNC2H1,CDH23,MYO7A,C5orf42,CC2D2A,CEP290,TTC8
GO Process	GO:1904491	Protein localization to ciliary transition zone	3	8	2023-03-02	0.00021	TMEM107,C5orf42,CC2D2A
GO Process	GO:0048568	Embryonic organ development	8	448	0.98	0.00035	MKKS,BBS7,AHI1,MKS1,GLI3,MYO7A,CC2D2A,CEP290
GO Process	GO:0060562	Epithelial tube morphogenesis	7	307	2023-08-01	0.00035	MKKS,BBS7,AHI1,MKS1,GLI3,CC2D2A,CEP290
GO Process	GO:0042461	Photoreceptor cell development	4	47	1.65	0.00050	CNGB1,AHI1,MYO7A,CEP290
GO Process	GO:0048856	Anatomical structure development	24	5402	0.37	0.00051	MKKS,CNGB1,BBS7,MERTK,USH2A,IQCB1,TMEM107,CEP63,OFD1,AHI1,RPGRIP1L,MKS1,GLI3,DYNC2H1,CDH23,MYO7A,C5orf42,CC2D2A,IFT74,TRIM32,PDE6B,EYS,CEP290,TTC8
GO Process	GO:0008104	Protein localization	15	2139	0.57	0.00066	CNGB1,BBS7,USH2A,TMEM107,BBS1,KIAA0753,AHI1,CEP83,DYNC2H1,MYO7A,C5orf42,CC2D2A,IFT74,CEP290,TTC8
GO Process	GO:0033036	Macromolecule localization	16	2473	0.53	0.00075	CNGB1,BBS7,USH2A,TMEM107,BBS1,KIAA0753,AHI1,ABCA4,CEP83,DYNC2H1,MYO7A,C5orf42,CC2D2A,IFT74,CEP290,TTC8
GO Process	GO:0060113	Inner ear receptor cell differentiation	4	56	1.58	0.00089	USH2A,MKS1,CDH23,MYO7A
GO Process	GO:0042733	Embryonic digit morphogenesis	4	61	1.54	0.0012	TMEM107,MKS1,GLI3,C5orf42
GO Process	GO:0007603	Phototransduction, visible light	3	18	1.95	0.0014	CNGB1,ABCA4,PDE6B
GO Process	GO:0050908	Detection of light stimulus involved in visual perception	3	19	1.92	0.0016	CNGB1,BEST1,EYS
GO Process	GO:0060322	Head development	9	788	0.78	0.0021	MKKS,BBS7,AHI1,RPGRIP1L,MKS1,GLI3,DYNC2H1,C5orf42,CEP290
GO Process	GO:0007275	Multicellular organism development	22	5023	0.36	0.0023	MKKS,CNGB1,BBS7,MERTK,USH2A,IQCB1,TMEM107,OFD1,AHI1,RPGRIP1L,MKS1,GLI3,DYNC2H1,CDH23,MYO7A,C5orf42,CC2D2A,IFT74,TRIM32,PDE6B,CEP290,TTC8
GO Process	GO:0021915	Neural tube development	5	160	1.22	0.0023	TMEM107,RPGRIP1L,MKS1,GLI3,CC2D2A
GO Process	GO:0030182	Neuron differentiation	10	1019	0.72	0.0023	CNGB1,USH2A,AHI1,MKS1,GLI3,DYNC2H1,CDH23,MYO7A,TRIM32,CEP290
GO Process	GO:0051904	Pigment granule transport	3	22	1.86	0.0023	MKKS,BBS7,MYO7A
GO Process	GO:0051877	Pigment granule aggregation in cell center	2	2	2.72	0.0031	MKKS,BBS7
GO Process	GO:0048562	Embryonic organ morphogenesis	6	301	2023-02-01	0.0032	MKKS,BBS7,AHI1,GLI3,MYO7A,CEP290
GO Process	GO:0009416	Response to light stimulus	6	302	2023-02-01	0.0033	CNGB1,ABCA4,BEST1,TRIM32,PDE6B,EYS
GO Process	GO:0022400	Regulation of rhodopsin mediated signaling pathway	3	27	1.77	0.0035	CNGB1,GUCY2D,PDE6B
GO Process	GO:0035295	Tube development	9	851	0.75	0.0035	MKKS,BBS7,TMEM107,AHI1,RPGRIP1L,MKS1,GLI3,CC2D2A,CEP290
GO Process	GO:0048513	Animal organ development	17	3197	0.45	0.0035	MKKS,BBS7,MERTK,USH2A,IQCB1,AHI1,RPGRIP1L,MKS1,GLI3,DYNC2H1,CDH23,MYO7A,C5orf42,CC2D2A,IFT74,PDE6B,CEP290
GO Process	GO:0008589	Regulation of smoothened signaling pathway	4	87	1.39	0.0036	RPGRIP1L,MKS1,GLI3,DYNC2H1
GO Process	GO:0043010	Camera-type eye development	6	318	1.0	0.0041	MERTK,AHI1,RPGRIP1L,GLI3,CC2D2A,PDE6B
GO Process	GO:0043473	Pigmentation	4	92	1.36	0.0044	MKKS,BBS7,GLI3,MYO7A
GO Process	GO:0048731	System development	20	4426	0.38	0.0045	MKKS,CNGB1,BBS7,MERTK,USH2A,IQCB1,TMEM107,AHI1,RPGRIP1L,MKS1,GLI3,DYNC2H1,CDH23,MYO7A,C5orf42,CC2D2A,IFT74,TRIM32,PDE6B,CEP290
GO Process	GO:0060122	Inner ear receptor cell stereocilium organization	3	31	1.71	0.0048	MKS1,CDH23,MYO7A
GO Process	GO:0042592	Homeostatic process	12	1676	0.58	0.0052	MKKS,CNGB1,MERTK,USH2A,IQCB1,BBS1,ABCA4,MKS1,CDH23,TRIM32,PDE6B,RDH12
GO Process	GO:0021532	Neural tube patterning	3	35	1.66	0.0066	TMEM107,RPGRIP1L,GLI3
GO Process	GO:0033365	Protein localization to organelle	8	743	0.76	0.0084	CNGB1,TMEM107,BBS1,KIAA0753,CEP83,DYNC2H1,C5orf42,CC2D2A
GO Process	GO:0007420	Brain development	8	745	0.75	0.0085	MKKS,BBS7,AHI1,RPGRIP1L,GLI3,DYNC2H1,C5orf42,CEP290
GO Process	GO:0048496	Maintenance of animal organ identity	2	5	2.33	0.0093	USH2A,IQCB1
GO Process	GO:0001738	Morphogenesis of a polarized epithelium	3	45	1.55	0.0126	AHI1,RPGRIP1L,C5orf42
GO Process	GO:0048546	Digestive tract morphogenesis	3	48	1.52	0.0150	BBS7,AHI1,GLI3
GO Process	GO:0050957	Equilibrioception	2	7	2.18	0.0151	CDH23,MYO7A
GO Process	GO:0034613	Cellular protein localization	11	1610	0.56	0.0163	CNGB1,TMEM107,BBS1,KIAA0753,AHI1,CEP83,DYNC2H1,MYO7A,C5orf42,CC2D2A,IFT74
GO Process	GO:0048666	Neuron development	8	827	0.71	0.0163	CNGB1,AHI1,MKS1,GLI3,CDH23,MYO7A,TRIM32,CEP290
GO Process	GO:0048468	Cell development	11	1629	0.55	0.0176	MKKS,CNGB1,MERTK,AHI1,MKS1,GLI3,CDH23,MYO7A,IFT74,TRIM32,CEP290
GO Process	GO:0048793	Pronephros development	2	8	2023-12-02	0.0178	AHI1,CEP290
GO Process	GO:0001822	Kidney development	5	271	0.99	0.0183	AHI1,RPGRIP1L,GLI3,C5orf42,CEP290
GO Process	GO:0008277	Regulation of g protein-coupled receptor signaling pathway	4	146	1.16	0.0201	CNGB1,GUCY2D,RPGRIP1L,PDE6B
GO Process	GO:0048592	Eye morphogenesis	4	151	1.15	0.0224	AHI1,GLI3,MYO7A,CEP290
GO Process	GO:0007605	Sensory perception of sound	4	153	1.14	0.0232	MKKS,USH2A,CDH23,MYO7A
GO Process	GO:0030902	Hindbrain development	4	154	1.14	0.0235	AHI1,RPGRIP1L,C5orf42,CEP290
GO Process	GO:0001947	Heart looping	3	64	1.39	0.0292	MKKS,BBS7,AHI1
GO Process	GO:0016056	Rhodopsin mediated signaling pathway	2	12	1.95	0.0330	CNGB1,PDE6B
GO Process	GO:0035845	Photoreceptor cell outer segment organization	2	12	1.95	0.0330	CNGB1,AHI1
GO Process	GO:1990403	Embryonic brain development	2	13	1.91	0.0363	MKS1,CC2D2A
GO Process	GO:0009887	Animal organ morphogenesis	8	967	0.64	0.0389	MKKS,BBS7,USH2A,AHI1,MKS1,GLI3,MYO7A,CEP290
GO Process	GO:0003002	Regionalization	5	332	0.9	0.0403	TMEM107,AHI1,RPGRIP1L,GLI3,DYNC2H1
GO Process	GO:0043584	Nose development	2	15	1.85	0.0454	RPGRIP1L,GLI3
GO Process	GO:0071599	Otic vesicle development	2	15	1.85	0.0454	AHI1,CEP290
GO Molecular Function
GO Function	GO:0001103	RNA polymerase II repressing transcription factor binding	4	35	1.78	0.0027	MKKS,BBS7,BBS1,TTC8
GO Cellular component
GO Component	GO:0005929	Cilium	30	637	2023-04-01	6.63e-35	MKKS,CNGB1,GUCY2D,BBS7,MERTK,USH2A,IQCB1,TMEM107,BBS1,CERKL,EVC2,OFD1,KIAA0586,AHI1,ABCA4,RPGRIP1L,MKS1,GLI3,CEP83,DYNC2H1,MYO7A,C5orf42,TMEM67,CC2D2A,IFT74,HYLS1,PDE6B,EYS,CEP290,TTC8
GO Component	GO:0097730	Non-motile cilium	17	160	1.75	9.29e-23	MKKS,CNGB1,GUCY2D,BBS7,MERTK,USH2A,IQCB1,CERKL,AHI1,ABCA4,RPGRIP1L,MYO7A,HYLS1,PDE6B,EYS,CEP290,TTC8
GO Component	GO:0042995	Cell projection	32	2287	0.87	2.42e-22	IMPG2,MKKS,CNGB1,GUCY2D,BBS7,MERTK,USH2A,IQCB1,TMEM107,BBS1,CERKL,EVC2,OFD1,KIAA0586,AHI1,ABCA4,RPGRIP1L,MKS1,GLI3,CEP83,DYNC2H1,CDH23,MYO7A,C5orf42,TMEM67,CC2D2A,IFT74,HYLS1,PDE6B,EYS,CEP290,TTC8
GO Component	GO:0120025	Plasma membrane bounded cell projection	31	2193	0.87	2.06e-21	MKKS,CNGB1,GUCY2D,BBS7,MERTK,USH2A,IQCB1,TMEM107,BBS1,CERKL,EVC2,OFD1,KIAA0586,AHI1,ABCA4,RPGRIP1L,MKS1,GLI3,CEP83,DYNC2H1,CDH23,MYO7A,C5orf42,TMEM67,CC2D2A,IFT74,HYLS1,PDE6B,EYS,CEP290,TTC8
GO Component	GO:0097733	Photoreceptor cell cilium	13	115	1.78	2.23e-17	CNGB1,GUCY2D,BBS7,MERTK,USH2A,IQCB1,CERKL,ABCA4,RPGRIP1L,MYO7A,PDE6B,EYS,CEP290
GO Component	GO:0035869	Ciliary transition zone	11	66	1.95	3.12e-16	USH2A,IQCB1,TMEM107,AHI1,RPGRIP1L,MKS1,MYO7A,C5orf42,TMEM67,CC2D2A,CEP290
GO Component	GO:0005815	Microtubule organizing center	19	761	2023-12-01	3.84e-15	MKKS,BBS7,USH2A,IQCB1,BBS1,CEP63,OFD1,KIAA0586,KIAA0753,AHI1,RPGRIP1L,MKS1,CEP83,TMEM67,IFT74,HYLS1,EYS,CEP290,TTC8
GO Component	GO:0001750	Photoreceptor outer segment	10	88	1.78	3.38e-13	CNGB1,GUCY2D,BBS7,MERTK,IQCB1,CERKL,ABCA4,MYO7A,PDE6B,EYS
GO Component	GO:0005813	Centrosome	16	565	1.18	3.38e-13	MKKS,BBS7,IQCB1,BBS1,CEP63,OFD1,KIAA0586,KIAA0753,AHI1,RPGRIP1L,MKS1,TMEM67,IFT74,HYLS1,CEP290,TTC8
GO Component	GO:0036064	Ciliary basal body	11	134	1.64	3.38e-13	MKKS,BBS7,USH2A,BBS1,OFD1,KIAA0586,AHI1,RPGRIP1L,MKS1,CEP290,TTC8
GO Component	GO:0015630	Microtubule cytoskeleton	20	1219	0.94	7.14e-13	MKKS,BBS7,USH2A,IQCB1,BBS1,CEP63,OFD1,KIAA0586,KIAA0753,AHI1,RPGRIP1L,MKS1,CEP83,DYNC2H1,TMEM67,IFT74,HYLS1,EYS,CEP290,TTC8
GO Component	GO:0005856	Cytoskeleton	24	2221	0.76	2.42e-12	MKKS,BBS7,USH2A,IQCB1,BBS1,CEP63,EVC2,OFD1,KIAA0586,KIAA0753,AHI1,RPGRIP1L,MKS1,GLI3,CEP83,DYNC2H1,MYO7A,TMEM67,CC2D2A,IFT74,HYLS1,EYS,CEP290,TTC8
GO Component	GO:0005814	Centriole	10	142	1.57	2.06e-11	IQCB1,CEP63,OFD1,KIAA0586,KIAA0753,AHI1,MKS1,CEP83,HYLS1,CEP290
GO Component	GO:0036038	MKS complex	6	13	2.39	8.91e-11	TMEM107,AHI1,MKS1,TMEM67,CC2D2A,CEP290
GO Component	GO:0060170	Ciliary membrane	7	72	1.71	1.31e-08	CNGB1,GUCY2D,BBS7,BBS1,EVC2,TMEM67,TTC8
GO Component	GO:0043232	Intracellular non-membrane-bounded organelle	26	4880	0.45	9.13e-07	MKKS,BBS7,USH2A,IQCB1,BBS1,CEP63,CERKL,EVC2,OFD1,KIAA0586,KIAA0753,AHI1,RPGRIP1L,MKS1,GLI3,CEP83,DYNC2H1,MYO7A,TMEM67,CC2D2A,IFT74,TRIM32,HYLS1,EYS,CEP290,TTC8
GO Component	GO:0043005	Neuron projection	15	1366	0.76	9.24e-07	MKKS,CNGB1,GUCY2D,BBS7,MERTK,USH2A,IQCB1,CERKL,ABCA4,RPGRIP1L,CDH23,MYO7A,PDE6B,EYS,CEP290
GO Component	GO:0032391	Photoreceptor connecting cilium	5	38	1.84	1.40e-06	USH2A,IQCB1,RPGRIP1L,MYO7A,CEP290
GO Component	GO:0001917	Photoreceptor inner segment	5	57	1.67	8.76e-06	USH2A,CERKL,KIAA0586,MYO7A,RDH12
GO Component	GO:0031253	Cell projection membrane	8	338	2023-01-01	1.66e-05	CNGB1,GUCY2D,BBS7,USH2A,BBS1,EVC2,TMEM67,TTC8
GO Component	GO:0034464	BBSome	3	8	2023-03-02	7.47e-05	BBS7,BBS1,TTC8
GO Component	GO:0005930	Axoneme	5	117	1.35	0.00023	BBS7,BBS1,RPGRIP1L,GLI3,DYNC2H1
GO Component	GO:0032421	Stereocilium bundle	4	58	1.56	0.00036	MKKS,USH2A,CDH23,MYO7A
GO Component	GO:0098590	Plasma membrane region	11	1219	0.68	0.00067	CNGB1,GUCY2D,BBS7,USH2A,BBS1,EVC2,MYO7A,TMEM67,BEST1,RDH12,TTC8
GO Component	GO:0097381	Photoreceptor disc membrane	3	24	1.82	0.0011	GUCY2D,ABCA4,PDE6B
GO Component	GO:0032991	Protein-containing complex	21	5073	0.34	0.0040	IMPG2,CNGB1,BBS7,MERTK,USH2A,TMEM107,BBS1,EVC2,AHI1,MKS1,GLI3,CEP83,DYNC2H1,CDH23,MYO7A,TMEM67,BEST1,CC2D2A,IFT74,CEP290,TTC8
GO Component	GO:0033165	Interphotoreceptor matrix	2	6	2.25	0.0053	IMPG2,EYS
GO Component	GO:0097542	Ciliary tip	3	46	1.54	0.0056	GLI3,DYNC2H1,IFT74
GO Component	GO:0002139	Stereocilia coupling link	2	7	2.18	0.0062	USH2A,MYO7A
GO Component	GO:0032420	Stereocilium	3	53	1.48	0.0078	USH2A,CDH23,MYO7A
GO Component	GO:0043226	Organelle	35	13515	0.14	0.0082	MKKS,CNGB1,GUCY2D,BBS7,MERTK,USH2A,IQCB1,TMEM107,BBS1,CEP63,CERKL,EVC2,OFD1,KIAA0586,KIAA0753,AHI1,ABCA4,RPGRIP1L,MKS1,GLI3,CEP83,DYNC2H1,CDH23,MYO7A,C5orf42,TMEM67,CC2D2A,IFT74,TRIM32,HYLS1,PDE6B,EYS,CEP290,RDH12,TTC8
GO Component	GO:0005829	Cytosol	20	5193	0.31	0.0160	MKKS,BBS7,IQCB1,BBS1,CEP63,CERKL,OFD1,KIAA0753,AHI1,RPGRIP1L,MKS1,GLI3,CEP83,MYO7A,BEST1,CC2D2A,TRIM32,HYLS1,CEP290,TTC8
GO Component	GO:0034451	Centriolar satellite	3	95	1.22	0.0363	OFD1,KIAA0753,CEP290
Reactome
Reactome	HSA-5617833	Cilium Assembly	17	197	1.66	6.65e-21	MKKS,CNGB1,BBS7,IQCB1,BBS1,CEP63,OFD1,AHI1,RPGRIP1L,MKS1,CEP83,DYNC2H1,TMEM67,CC2D2A,IFT74,CEP290,TTC8
Reactome	HSA-5620912	Anchoring of the basal body to the plasma membrane	10	97	1.74	3.41e-12	IQCB1,CEP63,OFD1,AHI1,RPGRIP1L,MKS1,CEP83,TMEM67,CC2D2A,CEP290
Reactome	HSA-2187338	Visual phototransduction	6	99	1.51	2.26e-05	CNGB1,GUCY2D,ABCA4,MYO7A,PDE6B,RDH12
Reactome	HSA-5620920	Cargo trafficking to the periciliary membrane	5	50	1.72	2.55e-05	MKKS,CNGB1,BBS7,BBS1,TTC8
Reactome	HSA-5620922	BBSome-mediated cargo-targeting to cilium	4	22	1.98	5.64e-05	MKKS,BBS7,BBS1,TTC8
Reactome	HSA-5358351	Signaling by Hedgehog	6	146	1.34	0.00012	EVC2,OFD1,RPGRIP1L,MKS1,GLI3,DYNC2H1
Reactome	HSA-5610787	Hedgehog off state	5	110	1.38	0.00065	OFD1,RPGRIP1L,MKS1,GLI3,DYNC2H1
Reactome	HSA-2453902	The canonical retinoid cycle in rods (twilight vision)	3	23	1.84	0.0038	ABCA4,MYO7A,RDH12
Reactome	HSA-2514859	Inactivation, recovery and regulation of the phototransduction cascade	3	33	1.68	0.0092	CNGB1,GUCY2D,PDE6B
Reactome	HSA-2485179	Activation of the phototransduction cascade	2	11	1.98	0.0446	CNGB1,PDE6B
Reactome	HSA-2453864	Retinoid cycle disease events	2	12	1.95	0.0482	ABCA4,RDH12
Reactome	HSA-380259	Loss of Nlp from mitotic centrosomes	3	69	1.36	0.0482	CEP63,OFD1,CEP290
Reactome	HSA-8854518	AURKA Activation by TPX2	3	72	1.34	0.0482	CEP63,OFD1,CEP290

## Sheet: Enrichment subnetwork3
#category	term ID	term description	observed gene count	background gene count	strength	false discovery rate	matching proteins in your network (labels)
GO Biological Process
GO Process	GO:0006936	Muscle contraction	12	248	1.41	4.08e-10	GJA1,SCN1A,STAC3,DMPK,MYH7,ANK2,RYR1,DMD,RYR2,SCN4A,TTN,NEB
GO Process	GO:0006941	Striated muscle contraction	9	112	1.63	4.43e-09	GJA1,SCN1A,STAC3,DMPK,MYH7,ANK2,DMD,RYR2,TTN
GO Process	GO:0070252	Actin-mediated cell contraction	8	90	1.67	3.21e-08	GJA1,SCN1A,MYH7,ANK2,DMD,RYR2,TTN,NEB
GO Process	GO:0042391	Regulation of membrane potential	12	440	1.16	5.52e-08	GJA1,SCN1A,GABRB3,DMPK,ANK2,DMD,RYR2,CACNA1B,DLG4,SCN9A,MECP2,SCN4A
GO Process	GO:0003008	System process	20	1942	0.74	5.90e-08	GJA1,SLC6A1,SCN1A,GABRB3,STAC3,DMPK,MYH7,ANK2,RYR1,DMD,RYR2,CACNA1B,DLG4,SCN9A,MECP2,SCN4A,SYNGAP1,PRRT2,TTN,NEB
GO Process	GO:0060048	Cardiac muscle contraction	7	79	1.67	3.62e-07	GJA1,SCN1A,MYH7,ANK2,DMD,RYR2,TTN
GO Process	GO:0043269	Regulation of ion transport	13	696	0.99	3.71e-07	GJA1,SLC6A1,SCN1A,STAC3,DMPK,ANK2,KCNQ2,DMD,RYR2,CACNA1B,DLG4,SCN9A,SCN4A
GO Process	GO:0044057	Regulation of system process	12	592	2023-03-01	7.03e-07	GJA1,DMPK,MYH7,ANK2,RYR1,DMD,RYR2,LMNA,CACNA1B,DLG4,MECP2,SCN4A
GO Process	GO:0042692	Muscle cell differentiation	9	244	1.29	8.38e-07	STAC3,ANK2,RYR1,DMD,SYNE1,LMNA,MECP2,TTN,NEB
GO Process	GO:0001508	Action potential	7	97	1.58	8.61e-07	GJA1,SCN1A,ANK2,DMD,RYR2,SCN9A,SCN4A
GO Process	GO:0061061	Muscle structure development	11	479	2023-08-01	9.29e-07	STAC3,MYH7,ANK2,RYR1,DMD,RYR2,SYNE1,LMNA,MECP2,TTN,NEB
GO Process	GO:0065008	Regulation of biological quality	25	4042	0.51	9.29e-07	GJA1,SLC6A1,SCN1A,ABCC8,GABRB3,DMPK,MYH7,ANK2,RYR1,DMD,RYR2,SYNE1,LMNA,CACNA1B,SPTAN1,IQSEC2,DLG4,SCN9A,UNC80,MECP2,SCN4A,SYNGAP1,SPTBN2,PRRT2,NEB
GO Process	GO:0006812	Cation transport	13	881	0.89	3.11e-06	SLC6A1,ANO10,SCN1A,ABCC8,ANK2,KCNQ2,RYR1,RYR2,CACNA1B,KCNT1,SCN9A,UNC80,SCN4A
GO Process	GO:0034762	Regulation of transmembrane transport	11	560	2023-02-01	3.25e-06	GJA1,SCN1A,STAC3,ANK2,KCNQ2,DMD,RYR2,CACNA1B,DLG4,SCN9A,SCN4A
GO Process	GO:0098660	Inorganic ion transmembrane transport	12	714	0.95	3.25e-06	SLC6A1,ANO10,SCN1A,ABCC8,GABRB3,KCNQ2,RYR1,RYR2,CACNA1B,KCNT1,SCN9A,SCN4A
GO Process	GO:0006811	Ion transport	15	1344	0.77	4.86e-06	GJA1,SLC6A1,ANO10,SCN1A,ABCC8,GABRB3,ANK2,KCNQ2,RYR1,RYR2,CACNA1B,KCNT1,SCN9A,UNC80,SCN4A
GO Process	GO:0032879	Regulation of localization	20	2740	0.59	6.94e-06	GJA1,SLC6A1,SCN1A,ABCC8,STAC3,DMPK,ANK2,KCNQ2,RYR1,DMD,RYR2,LMNA,CACNA1B,IQSEC2,DLG4,SCN9A,MECP2,SCN4A,PRRT2,TTN
GO Process	GO:0055001	Muscle cell development	7	145	1.41	6.94e-06	STAC3,ANK2,RYR1,DMD,LMNA,TTN,NEB
GO Process	GO:0034765	Regulation of ion transmembrane transport	10	477	2023-04-01	8.01e-06	SCN1A,STAC3,ANK2,KCNQ2,DMD,RYR2,CACNA1B,DLG4,SCN9A,SCN4A
GO Process	GO:0008016	Regulation of heart contraction	8	245	1.24	9.52e-06	GJA1,DMPK,MYH7,ANK2,RYR1,DMD,RYR2,CACNA1B
GO Process	GO:0014819	Regulation of skeletal muscle contraction	4	13	2.21	1.19e-05	DMPK,MYH7,DMD,SCN4A
GO Process	GO:0006942	Regulation of striated muscle contraction	6	93	1.53	1.33e-05	DMPK,MYH7,ANK2,DMD,RYR2,SCN4A
GO Process	GO:0030001	Metal ion transport	11	666	0.94	1.33e-05	SLC6A1,SCN1A,ABCC8,ANK2,KCNQ2,RYR1,RYR2,CACNA1B,KCNT1,SCN9A,SCN4A
GO Process	GO:0051179	Localization	27	5591	0.41	1.33e-05	GJA1,SLC6A1,ANO10,SCN1A,ABCC8,GABRB3,ANK2,KCNQ2,RYR1,DMD,CDC42BPB,RYR2,SYNE1,LMNA,CACNA1B,KCNT1,SPTAN1,ARX,DLG4,SCN9A,UNC80,MECP2,SCN4A,SYNGAP1,SPTBN2,PRRT2,TTN
GO Process	GO:0008015	Blood circulation	9	394	2023-08-01	1.85e-05	GJA1,SCN1A,MYH7,ANK2,DMD,RYR2,CACNA1B,MECP2,TTN
GO Process	GO:0051049	Regulation of transport	16	1776	0.68	1.85e-05	GJA1,SLC6A1,SCN1A,ABCC8,STAC3,DMPK,ANK2,KCNQ2,DMD,RYR2,CACNA1B,DLG4,SCN9A,SCN4A,PRRT2,TTN
GO Process	GO:0086001	Cardiac muscle cell action potential	5	50	1.72	2.22e-05	GJA1,SCN1A,ANK2,DMD,RYR2
GO Process	GO:0007517	Muscle organ development	8	291	1.16	2.54e-05	STAC3,MYH7,RYR1,DMD,RYR2,LMNA,TTN,NEB
GO Process	GO:0007010	Cytoskeleton organization	13	1126	0.79	2.61e-05	GJA1,ANK2,DMD,CDC42BPB,SYNE1,LMNA,SPTAN1,IQSEC2,MECP2,SPTBN2,TTN,GAN,NEB
GO Process	GO:0051899	Membrane depolarization	5	53	2023-07-01	2.61e-05	SCN1A,ANK2,CACNA1B,SCN9A,SCN4A
GO Process	GO:0048747	Muscle fiber development	5	54	1.69	2.70e-05	STAC3,RYR1,DMD,TTN,NEB
GO Process	GO:0048468	Cell development	15	1629	0.69	3.33e-05	GJA1,GABRB3,STAC3,ANK2,RYR1,DMD,LMNA,SPTAN1,ARX,DLG4,MECP2,SYNGAP1,SPTBN2,TTN,NEB
GO Process	GO:0030029	Actin filament-based process	10	592	0.95	3.49e-05	GJA1,SCN1A,MYH7,ANK2,DMD,CDC42BPB,RYR2,IQSEC2,TTN,NEB
GO Process	GO:0098662	Inorganic cation transmembrane transport	10	628	0.93	5.85e-05	SLC6A1,SCN1A,ABCC8,KCNQ2,RYR1,RYR2,CACNA1B,KCNT1,SCN9A,SCN4A
GO Process	GO:0055002	Striated muscle cell development	6	132	1.38	6.19e-05	STAC3,RYR1,DMD,LMNA,TTN,NEB
GO Process	GO:0035637	Multicellular organismal signaling	6	137	1.36	7.47e-05	GJA1,SCN1A,ANK2,RYR2,SCN9A,SCN4A
GO Process	GO:0090257	Regulation of muscle system process	7	231	2023-02-01	7.51e-05	DMPK,MYH7,ANK2,DMD,RYR2,LMNA,SCN4A
GO Process	GO:0086010	Membrane depolarization during action potential	4	30	1.85	0.00013	SCN1A,ANK2,SCN9A,SCN4A
GO Process	GO:0014706	Striated muscle tissue development	7	280	2023-12-01	0.00025	STAC3,MYH7,RYR1,RYR2,LMNA,TTN,NEB
GO Process	GO:0007268	Chemical synaptic transmission	8	418	2023-01-01	0.00027	SLC6A1,GABRB3,STAC3,KCNQ2,CACNA1B,DLG4,MECP2,PRRT2
GO Process	GO:0030049	Muscle filament sliding	4	38	1.75	0.00028	MYH7,DMD,TTN,NEB
GO Process	GO:0086002	Cardiac muscle cell action potential involved in contraction	4	39	1.73	0.00030	GJA1,SCN1A,ANK2,RYR2
GO Process	GO:0023052	Signaling	24	5239	0.38	0.00033	GJA1,SLC6A1,SCN1A,GABRB3,STAC3,DMPK,ANK2,KCNQ2,RYR1,DMD,CDC42BPB,RYR2,LMNA,CACNA1B,SPTAN1,DLG4,DEPDC5,SCN9A,MECP2,SCN4A,SYNGAP1,SPTBN2,PRRT2,TTN
GO Process	GO:0050804	Modulation of chemical synaptic transmission	8	446	0.98	0.00037	SLC6A1,DMPK,CACNA1B,IQSEC2,DLG4,MECP2,SYNGAP1,PRRT2
GO Process	GO:0007154	Cell communication	24	5320	0.38	0.00041	GJA1,SLC6A1,SCN1A,GABRB3,STAC3,DMPK,ANK2,KCNQ2,RYR1,DMD,CDC42BPB,RYR2,LMNA,CACNA1B,SPTAN1,DLG4,DEPDC5,SCN9A,MECP2,SCN4A,SYNGAP1,SPTBN2,PRRT2,TTN
GO Process	GO:0051234	Establishment of localization	22	4479	0.41	0.00041	GJA1,SLC6A1,ANO10,SCN1A,ABCC8,GABRB3,ANK2,KCNQ2,RYR1,RYR2,LMNA,CACNA1B,KCNT1,SPTAN1,DLG4,SCN9A,UNC80,MECP2,SCN4A,SPTBN2,PRRT2,TTN
GO Process	GO:0034330	Cell junction organization	8	493	0.93	0.00068	GJA1,SLC6A1,GABRB3,ANK2,DLG4,MECP2,SYNGAP1,SPTBN2
GO Process	GO:0070296	Sarcoplasmic reticulum calcium ion transport	3	14	2023-05-02	0.00080	ANK2,RYR1,RYR2
GO Process	GO:0007507	Heart development	8	522	0.91	0.0010	GJA1,MYH7,ANK2,RYR1,RYR2,LMNA,TTN,NEB
GO Process	GO:0006810	Transport	21	4353	0.41	0.0011	GJA1,SLC6A1,ANO10,SCN1A,ABCC8,GABRB3,ANK2,KCNQ2,RYR1,RYR2,LMNA,CACNA1B,KCNT1,SPTAN1,SCN9A,UNC80,MECP2,SCN4A,SPTBN2,PRRT2,TTN
GO Process	GO:0007267	Cell-cell signaling	11	1145	0.71	0.0011	GJA1,SLC6A1,GABRB3,STAC3,ANK2,KCNQ2,RYR2,CACNA1B,DLG4,MECP2,PRRT2
GO Process	GO:0050884	Neuromuscular process controlling posture	3	16	2.0	0.0011	SCN1A,MECP2,PRRT2
GO Process	GO:0010959	Regulation of metal ion transport	7	391	0.98	0.0015	GJA1,STAC3,DMPK,ANK2,DMD,RYR2,CACNA1B
GO Process	GO:0035556	Intracellular signal transduction	13	1712	0.6	0.0015	STAC3,DMPK,ANK2,RYR1,DMD,CDC42BPB,RYR2,SPTAN1,DLG4,DEPDC5,SYNGAP1,SPTBN2,TTN
GO Process	GO:0035994	Response to muscle stretch	3	18	1.95	0.0015	DMD,RYR2,TTN
GO Process	GO:0051924	Regulation of calcium ion transport	6	256	2023-09-01	0.0015	GJA1,STAC3,ANK2,DMD,RYR2,CACNA1B
GO Process	GO:0007610	Behavior	8	572	0.87	0.0017	SLC6A1,SCN1A,CACNA1B,DLG4,SCN9A,MECP2,SYNGAP1,SPTBN2
GO Process	GO:1903779	Regulation of cardiac conduction	4	68	1.49	0.0017	DMPK,ANK2,RYR1,RYR2
GO Process	GO:0022898	Regulation of transmembrane transporter activity	6	269	2023-07-01	0.0019	GJA1,STAC3,ANK2,DMD,RYR2,DLG4
GO Process	GO:0010881	Regulation of cardiac muscle contraction by regulation of the release of sequestered calcium ion	3	21	1.88	0.0020	ANK2,DMD,RYR2
GO Process	GO:0006928	Movement of cell or subcellular component	12	1501	0.63	0.0021	GJA1,SCN1A,MYH7,ANK2,DMD,CDC42BPB,RYR2,SPTAN1,ARX,SPTBN2,TTN,NEB
GO Process	GO:0048738	Cardiac muscle tissue development	5	160	1.22	0.0022	MYH7,RYR2,LMNA,TTN,NEB
GO Process	GO:0006996	Organelle organization	18	3450	0.44	0.0024	KANSL1,GJA1,DMPK,ANK2,DMD,CDC42BPB,SYNE1,LMNA,SPTAN1,IQSEC2,DLG4,MECP2,SYNGAP1,SPTBN2,PRRT2,TTN,GAN,NEB
GO Process	GO:0050808	Synapse organization	6	283	2023-05-01	0.0024	SLC6A1,GABRB3,DLG4,MECP2,SYNGAP1,SPTBN2
GO Process	GO:0019722	Calcium-mediated signaling	5	165	2023-02-01	0.0025	DMPK,ANK2,RYR1,DMD,RYR2
GO Process	GO:0032989	Cellular component morphogenesis	8	614	0.84	0.0025	GJA1,ANK2,SPTAN1,ARX,DLG4,SPTBN2,TTN,NEB
GO Process	GO:0032501	Multicellular organismal process	26	6933	0.3	0.0026	GJA1,SLC6A1,SCN1A,GABRB3,STAC3,DMPK,MYH7,ANK2,KCNQ2,RYR1,DMD,RYR2,SYNE1,LMNA,CACNA1B,SPTAN1,ARX,DLG4,SCN9A,MECP2,SCN4A,SYNGAP1,SPTBN2,PRRT2,TTN,NEB
GO Process	GO:0098907	Regulation of sa node cell action potential	2	2	2.72	0.0030	ANK2,RYR2
GO Process	GO:0086019	Cell-cell signaling involved in cardiac conduction	3	27	1.77	0.0035	GJA1,ANK2,RYR2
GO Process	GO:0003300	Cardiac muscle hypertrophy	3	29	1.74	0.0042	MYH7,RYR2,TTN
GO Process	GO:0019228	Neuronal action potential	3	30	1.72	0.0044	SCN1A,SCN9A,SCN4A
GO Process	GO:1901019	Regulation of calcium ion transmembrane transporter activity	4	92	1.36	0.0044	STAC3,ANK2,DMD,RYR2
GO Process	GO:0003009	Skeletal muscle contraction	3	31	1.71	0.0048	STAC3,DMPK,MYH7
GO Process	GO:0002027	Regulation of heart rate	4	99	1.33	0.0054	MYH7,ANK2,DMD,RYR2
GO Process	GO:0009612	Response to mechanical stimulus	5	212	2023-01-01	0.0067	GJA1,SCN1A,DMD,RYR2,TTN
GO Process	GO:0032414	Positive regulation of ion transmembrane transporter activity	4	105	2023-03-01	0.0067	STAC3,ANK2,DMD,RYR2
GO Process	GO:1900114	Positive regulation of histone h3-k9 trimethylation	2	4	2.42	0.0067	LMNA,MECP2
GO Process	GO:0009987	Cellular process	37	15024	0.11	0.0072	PUS3,KANSL1,GJA1,SLC6A1,ANO10,SCN1A,ABCC8,GABRB3,STAC3,DMPK,MYH7,ANK2,KCNQ2,RYR1,DMD,CDC42BPB,RYR2,SYNE1,PPOX,LMNA,CACNA1B,KCNT1,SPTAN1,ARX,IQSEC2,DLG4,DEPDC5,SCN9A,UNC80,MECP2,SCN4A,SYNGAP1,SPTBN2,PRRT2,TTN,GAN,NEB
GO Process	GO:0016043	Cellular component organization	22	5447	0.33	0.0072	KANSL1,GJA1,SLC6A1,GABRB3,DMPK,ANK2,RYR1,DMD,CDC42BPB,SYNE1,LMNA,SPTAN1,ARX,IQSEC2,DLG4,MECP2,SYNGAP1,SPTBN2,PRRT2,TTN,GAN,NEB
GO Process	GO:0050905	Neuromuscular process	4	109	1.29	0.0074	SCN1A,DLG4,MECP2,PRRT2
GO Process	GO:0014722	Regulation of skeletal muscle contraction by calcium ion signaling	2	5	2.33	0.0088	DMPK,DMD
GO Process	GO:1901021	Positive regulation of calcium ion transmembrane transporter activity	3	41	1.59	0.0093	STAC3,ANK2,RYR2
GO Process	GO:0098910	Regulation of atrial cardiac muscle cell action potential	2	6	2.25	0.0112	ANK2,RYR2
GO Process	GO:0051282	Regulation of sequestering of calcium ion	4	134	2023-02-01	0.0147	ANK2,RYR1,DMD,RYR2
GO Process	GO:0032412	Regulation of ion transmembrane transporter activity	5	260	2023-01-01	0.0150	STAC3,ANK2,DMD,RYR2,DLG4
GO Process	GO:0048666	Neuron development	8	827	0.71	0.0150	GJA1,GABRB3,SPTAN1,ARX,DLG4,MECP2,SYNGAP1,SPTBN2
GO Process	GO:0014808	Release of sequestered calcium ion into cytosol by sarcoplasmic reticulum	2	8	2023-12-02	0.0171	RYR1,RYR2
GO Process	GO:0006874	Cellular calcium ion homeostasis	6	442	0.86	0.0189	GJA1,DMPK,ANK2,RYR1,RYR2,DLG4
GO Process	GO:0007612	Learning	4	145	1.16	0.0189	SLC6A1,DLG4,MECP2,SYNGAP1
GO Process	GO:0051641	Cellular localization	15	2967	0.43	0.0189	GJA1,SLC6A1,ANK2,RYR1,DMD,RYR2,SYNE1,LMNA,CACNA1B,SPTAN1,DLG4,SYNGAP1,SPTBN2,PRRT2,TTN
GO Process	GO:1904064	Positive regulation of cation transmembrane transport	4	145	1.16	0.0189	STAC3,ANK2,DMD,RYR2
GO Process	GO:0034329	Cell junction assembly	5	280	0.98	0.0197	GJA1,GABRB3,ANK2,MECP2,SPTBN2
GO Process	GO:0051592	Response to calcium ion	4	150	1.15	0.0202	SLC6A1,RYR1,RYR2,TTN
GO Process	GO:0055013	Cardiac muscle cell development	3	57	1.44	0.0202	LMNA,TTN,NEB
GO Process	GO:0043270	Positive regulation of ion transport	5	285	0.97	0.0205	SLC6A1,STAC3,ANK2,DMD,RYR2
GO Process	GO:0071313	Cellular response to caffeine	2	10	2023-02-02	0.0222	RYR1,RYR2
GO Process	GO:0009628	Response to abiotic stimulus	9	1147	0.62	0.0225	GJA1,SCN1A,RYR1,DMD,RYR2,LMNA,MECP2,SYNGAP1,TTN
GO Process	GO:0031175	Neuron projection development	7	680	0.74	0.0245	GJA1,SPTAN1,ARX,DLG4,MECP2,SYNGAP1,SPTBN2
GO Process	GO:0051050	Positive regulation of transport	8	923	0.66	0.0264	GJA1,SLC6A1,STAC3,ANK2,DMD,RYR2,PRRT2,TTN
GO Process	GO:0055008	Cardiac muscle tissue morphogenesis	3	65	1.39	0.0264	MYH7,RYR2,TTN
GO Process	GO:0055080	Cation homeostasis	7	712	0.72	0.0309	GJA1,DMPK,ANK2,RYR1,RYR2,DLG4,UNC80
GO Process	GO:0023051	Regulation of signaling	16	3553	0.38	0.0326	GJA1,SLC6A1,ABCC8,DMPK,ANK2,RYR1,DMD,RYR2,LMNA,CACNA1B,IQSEC2,DLG4,DEPDC5,MECP2,SYNGAP1,PRRT2
GO Process	GO:0033555	Multicellular organismal response to stress	3	71	1.35	0.0326	CACNA1B,SCN9A,MECP2
GO Process	GO:2001257	Regulation of cation channel activity	4	177	2023-08-01	0.0326	STAC3,ANK2,DMD,DLG4
GO Process	GO:0086014	Atrial cardiac muscle cell action potential	2	14	1.88	0.0355	GJA1,ANK2
GO Process	GO:1904062	Regulation of cation transmembrane transport	5	337	0.89	0.0368	STAC3,ANK2,DMD,RYR2,DLG4
GO Process	GO:0008306	Associative learning	3	76	1.32	0.0375	SLC6A1,MECP2,SYNGAP1
GO Process	GO:0048731	System development	18	4426	0.33	0.0384	GJA1,GABRB3,STAC3,MYH7,ANK2,KCNQ2,RYR1,DMD,RYR2,LMNA,SPTAN1,ARX,DLG4,MECP2,SYNGAP1,SPTBN2,TTN,NEB
GO Process	GO:0019233	Sensory perception of pain	3	78	1.31	0.0393	SCN1A,SCN9A,MECP2
GO Process	GO:0048167	Regulation of synaptic plasticity	4	191	2023-04-01	0.0394	DLG4,MECP2,SYNGAP1,PRRT2
GO Process	GO:0007626	Locomotory behavior	4	194	2023-04-01	0.0413	SCN1A,CACNA1B,DLG4,MECP2
GO Process	GO:0086064	Cell communication by electrical coupling involved in cardiac conduction	2	16	1.82	0.0415	GJA1,RYR2
GO Process	GO:0060341	Regulation of cellular localization	8	1027	0.61	0.0449	STAC3,ANK2,RYR1,DMD,RYR2,LMNA,IQSEC2,PRRT2
GO Process	GO:0030154	Cell differentiation	16	3702	0.36	0.0459	GJA1,GABRB3,STAC3,ANK2,RYR1,DMD,SYNE1,LMNA,SPTAN1,ARX,DLG4,MECP2,SYNGAP1,SPTBN2,TTN,NEB
GO Process	GO:0048856	Anatomical structure development	20	5402	0.29	0.0478	GJA1,GABRB3,STAC3,MYH7,ANK2,KCNQ2,RYR1,DMD,RYR2,SYNE1,LMNA,SPTAN1,ARX,DLG4,SCN9A,MECP2,SYNGAP1,SPTBN2,TTN,NEB
GO Process	GO:0010038	Response to metal ion	5	367	0.86	0.0482	SLC6A1,RYR1,RYR2,DLG4,TTN
GO Process	GO:0099173	Postsynapse organization	3	88	1.26	0.0495	DLG4,SYNGAP1,SPTBN2
GO Molecular Function								GO Biological Process								GO Biological Process
GO Function	GO:0015267	Channel activity	13	471	1.16	7.26e-09	GJA1,ANO10,SCN1A,ABCC8,GABRB3,KCNQ2,RYR1,RYR2,CACNA1B,KCNT1,SCN9A,UNC80,SCN4A
GO Function	GO:0005216	Ion channel activity	12	425	1.17	1.57e-08	ANO10,SCN1A,ABCC8,GABRB3,KCNQ2,RYR1,RYR2,CACNA1B,KCNT1,SCN9A,UNC80,SCN4A
GO Function	GO:0005261	Cation channel activity	11	326	1.25	1.57e-08	ANO10,SCN1A,ABCC8,KCNQ2,RYR1,RYR2,CACNA1B,KCNT1,SCN9A,UNC80,SCN4A
GO Function	GO:0015075	Ion transmembrane transporter activity	14	865	0.93	1.81e-07	GJA1,SLC6A1,ANO10,SCN1A,ABCC8,GABRB3,KCNQ2,RYR1,RYR2,CACNA1B,KCNT1,SCN9A,UNC80,SCN4A
GO Function	GO:0022836	Gated channel activity	10	332	2023-02-01	2.79e-07	ANO10,SCN1A,GABRB3,KCNQ2,RYR1,RYR2,CACNA1B,KCNT1,SCN9A,SCN4A
GO Function	GO:0022890	Inorganic cation transmembrane transporter activity	12	584	2023-04-01	2.79e-07	SLC6A1,ANO10,SCN1A,ABCC8,KCNQ2,RYR1,RYR2,CACNA1B,KCNT1,SCN9A,UNC80,SCN4A
GO Function	GO:0015318	Inorganic molecular entity transmembrane transporter activity	13	813	0.93	6.02e-07	SLC6A1,ANO10,SCN1A,ABCC8,GABRB3,KCNQ2,RYR1,RYR2,CACNA1B,KCNT1,SCN9A,UNC80,SCN4A
GO Function	GO:0046873	Metal ion transmembrane transporter activity	10	427	2023-09-01	1.64e-06	SLC6A1,SCN1A,ABCC8,KCNQ2,RYR1,RYR2,CACNA1B,KCNT1,SCN9A,SCN4A
GO Function	GO:0005244	Voltage-gated ion channel activity	7	194	1.28	2.12e-05	SCN1A,KCNQ2,RYR1,CACNA1B,KCNT1,SCN9A,SCN4A
GO Function	GO:0005516	Calmodulin binding	6	201	2023-02-01	0.00049	MYH7,KCNQ2,RYR1,RYR2,SPTAN1,TTN
GO Function	GO:0015077	Monovalent inorganic cation transmembrane transporter activity	7	381	0.99	0.0014	SLC6A1,SCN1A,ABCC8,KCNQ2,KCNT1,SCN9A,SCN4A
GO Function	GO:0008092	Cytoskeletal protein binding	10	973	0.74	0.0018	GJA1,MYH7,ANK2,KCNQ2,DMD,SYNE1,SPTAN1,SPTBN2,TTN,NEB
GO Function	GO:0005248	Voltage-gated sodium channel activity	3	23	1.84	0.0028	SCN1A,SCN9A,SCN4A
GO Function	GO:0003779	Actin binding	7	438	0.93	0.0029	MYH7,DMD,SYNE1,SPTAN1,SPTBN2,TTN,NEB
GO Function	GO:0005219	Ryanodine-sensitive calcium-release channel activity	2	3	2.55	0.0056	RYR1,RYR2
GO Function	GO:0005200	Structural constituent of cytoskeleton	4	104	1.31	0.0077	ANK2,DMD,SPTAN1,SPTBN2
GO Function	GO:0048763	Calcium-induced calcium release activity	2	4	2.42	0.0077	RYR1,RYR2
GO Function	GO:0005515	Protein binding	25	7026	0.27	0.0125	KANSL1,GJA1,SLC6A1,ABCC8,GABRB3,STAC3,MYH7,ANK2,KCNQ2,RYR1,DMD,CDC42BPB,RYR2,SYNE1,LMNA,CACNA1B,SPTAN1,IQSEC2,DLG4,MECP2,SYNGAP1,SPTBN2,PRRT2,TTN,NEB
GO Function	GO:0008307	Structural constituent of muscle	3	43	1.57	0.0125	DMD,TTN,NEB
GO Function	GO:0022843	Voltage-gated cation channel activity	4	137	1.19	0.0175	KCNQ2,RYR1,CACNA1B,KCNT1
GO Function	GO:0005198	Structural molecule activity	7	635	0.77	0.0205	ANK2,DMD,LMNA,SPTAN1,SPTBN2,TTN,NEB
GO Function	GO:0015081	Sodium ion transmembrane transporter activity	4	150	1.15	0.0229	SLC6A1,SCN1A,SCN9A,SCN4A
GO Cellular Component
GO Component	GO:0034702	Ion channel complex	12	289	1.34	3.08e-10	SCN1A,ABCC8,GABRB3,STAC3,KCNQ2,RYR1,RYR2,CACNA1B,DLG4,SCN9A,UNC80,SCN4A
GO Component	GO:0034703	Cation channel complex	11	214	1.43	3.08e-10	SCN1A,ABCC8,STAC3,KCNQ2,RYR1,RYR2,CACNA1B,DLG4,SCN9A,UNC80,SCN4A
GO Component	GO:0030017	Sarcomere	9	207	1.36	5.75e-08	SCN1A,MYH7,ANK2,RYR1,DMD,RYR2,SYNE1,TTN,NEB
GO Component	GO:0030018	Z disc	8	131	1.51	5.75e-08	SCN1A,MYH7,ANK2,RYR1,DMD,RYR2,TTN,NEB
GO Component	GO:0098796	Membrane protein complex	15	1141	0.84	1.54e-07	GJA1,SCN1A,ABCC8,GABRB3,STAC3,KCNQ2,RYR1,DMD,RYR2,SYNE1,CACNA1B,DLG4,SCN9A,UNC80,SCN4A
GO Component	GO:0098797	Plasma membrane protein complex	11	547	2023-03-01	6.08e-07	GJA1,SCN1A,ABCC8,STAC3,KCNQ2,RYR1,DMD,CACNA1B,DLG4,SCN9A,SCN4A
GO Component	GO:0030054	Cell junction	17	2075	0.64	7.84e-06	GJA1,SLC6A1,SCN1A,GABRB3,STAC3,ANK2,KCNQ2,DMD,CDC42BPB,SYNE1,CACNA1B,IQSEC2,DLG4,MECP2,SYNGAP1,SPTBN2,PRRT2
GO Component	GO:0045202	Synapse	14	1351	0.74	1.03e-05	SLC6A1,GABRB3,STAC3,ANK2,KCNQ2,DMD,SYNE1,CACNA1B,IQSEC2,DLG4,MECP2,SYNGAP1,SPTBN2,PRRT2
GO Component	GO:0042383	Sarcolemma	6	132	1.38	2.57e-05	SCN1A,STAC3,ANK2,RYR1,DMD,RYR2
GO Component	GO:0098794	Postsynapse	10	643	0.92	2.75e-05	SLC6A1,GABRB3,ANK2,DMD,SYNE1,DLG4,MECP2,SYNGAP1,SPTBN2,PRRT2
GO Component	GO:0071944	Cell periphery	25	5432	0.39	6.04e-05	GJA1,SLC6A1,ANO10,SCN1A,ABCC8,GABRB3,STAC3,DMPK,ANK2,KCNQ2,RYR1,DMD,CDC42BPB,RYR2,SYNE1,CACNA1B,KCNT1,SPTAN1,DLG4,SCN9A,UNC80,SCN4A,SYNGAP1,SPTBN2,PRRT2
GO Component	GO:0043005	Neuron projection	13	1366	0.7	7.04e-05	SLC6A1,SCN1A,GABRB3,ANK2,KCNQ2,DMD,CACNA1B,DLG4,SCN9A,UNC80,SCN4A,SYNGAP1,PRRT2
GO Component	GO:0045211	Postsynaptic membrane	7	281	2023-12-01	9.15e-05	SLC6A1,GABRB3,ANK2,DMD,SYNE1,DLG4,PRRT2
GO Component	GO:0005886	Plasma membrane	24	5314	0.38	0.00017	GJA1,SLC6A1,ANO10,SCN1A,ABCC8,GABRB3,STAC3,DMPK,ANK2,KCNQ2,RYR1,DMD,CDC42BPB,RYR2,SYNE1,CACNA1B,KCNT1,DLG4,SCN9A,UNC80,SCN4A,SYNGAP1,SPTBN2,PRRT2
GO Component	GO:0030315	T-tubule	4	54	1.59	0.00036	SCN1A,STAC3,ANK2,RYR1
GO Component	GO:0001518	Voltage-gated sodium channel complex	3	17	1.97	0.00056	SCN1A,SCN9A,SCN4A
GO Component	GO:0099512	Supramolecular fiber	10	939	0.75	0.00056	SCN1A,MYH7,ANK2,RYR1,DMD,RYR2,SYNE1,LMNA,TTN,NEB
GO Component	GO:0034704	Calcium channel complex	4	64	1.52	0.00057	STAC3,RYR1,RYR2,CACNA1B
GO Component	GO:0099080	Supramolecular complex	11	1261	0.66	0.00096	KANSL1,SCN1A,MYH7,ANK2,RYR1,DMD,RYR2,SYNE1,LMNA,TTN,NEB
GO Component	GO:0030424	Axon	8	646	0.82	0.0015	SLC6A1,SCN1A,KCNQ2,DLG4,SCN9A,UNC80,SCN4A,PRRT2
GO Component	GO:0120025	Plasma membrane bounded cell projection	14	2193	0.53	0.0015	SLC6A1,SCN1A,GABRB3,ANK2,KCNQ2,DMD,CDC42BPB,CACNA1B,DLG4,SCN9A,UNC80,SCN4A,SYNGAP1,PRRT2
GO Component	GO:0033017	Sarcoplasmic reticulum membrane	3	38	1.62	0.0034	DMPK,RYR1,RYR2
GO Component	GO:0032991	Protein-containing complex	21	5073	0.34	0.0037	KANSL1,GJA1,SCN1A,ABCC8,GABRB3,STAC3,MYH7,KCNQ2,RYR1,DMD,RYR2,SYNE1,CACNA1B,SPTAN1,DLG4,DEPDC5,SCN9A,UNC80,SCN4A,SPTBN2,GAN
GO Component	GO:0005891	Voltage-gated calcium channel complex	3	41	1.59	0.0040	STAC3,RYR1,CACNA1B
GO Component	GO:0005856	Cytoskeleton	13	2221	0.49	0.0067	MYH7,ANK2,DMD,CDC42BPB,SYNE1,LMNA,SPTAN1,DLG4,MECP2,SPTBN2,TTN,GAN,NEB
GO Component	GO:0005887	Integral component of plasma membrane	11	1623	0.55	0.0070	GJA1,SLC6A1,SCN1A,ABCC8,GABRB3,KCNQ2,RYR1,DLG4,SCN9A,SCN4A,PRRT2
GO Component	GO:0014704	Intercalated disc	3	51	1.49	0.0070	GJA1,SCN1A,ANK2
GO Component	GO:0008091	Spectrin	2	9	2023-07-02	0.0087	SPTAN1,SPTBN2
GO Component	GO:0014701	Junctional sarcoplasmic reticulum membrane	2	10	2023-02-02	0.0100	RYR1,RYR2
GO Component	GO:0015629	Actin cytoskeleton	6	477	0.82	0.0112	MYH7,CDC42BPB,SPTAN1,SPTBN2,TTN,NEB
GO Component	GO:0016020	Membrane	28	9072	0.21	0.0116	GJA1,SLC6A1,ANO10,SCN1A,ABCC8,GABRB3,STAC3,DMPK,ANK2,KCNQ2,RYR1,DMD,CDC42BPB,RYR2,SYNE1,PPOX,LMNA,CACNA1B,KCNT1,SPTAN1,DLG4,DEPDC5,SCN9A,UNC80,SCN4A,SYNGAP1,SPTBN2,PRRT2
GO Component	GO:0016021	Integral component of membrane	20	5181	0.31	0.0137	GJA1,SLC6A1,ANO10,SCN1A,ABCC8,GABRB3,STAC3,DMPK,KCNQ2,RYR1,RYR2,SYNE1,PPOX,CACNA1B,KCNT1,DLG4,SCN9A,UNC80,SCN4A,PRRT2
GO Component	GO:0044304	Main axon	3	70	1.36	0.0137	SCN1A,KCNQ2,DLG4
GO Component	GO:0098590	Plasma membrane region	9	1219	0.59	0.0137	GJA1,SLC6A1,GABRB3,ANK2,DMD,SYNE1,DLG4,SPTBN2,PRRT2
GO Component	GO:0033268	Node of ranvier	2	15	1.85	0.0167	SCN1A,KCNQ2
GO Component	GO:0043194	Axon initial segment	2	18	1.77	0.0219	SCN1A,KCNQ2
GO Component	GO:0043034	Costamere	2	19	1.75	0.0237	ANK2,DMD
GO Component	GO:0030863	Cortical cytoskeleton	3	96	1.22	0.0280	SPTAN1,DLG4,SPTBN2
GO Component	GO:0036477	Somatodendritic compartment	7	852	0.64	0.0316	SLC6A1,SCN1A,CACNA1B,DLG4,SYNGAP1,SPTBN2,PRRT2
GO Component	GO:0031430	M band	2	25	1.63	0.0372	ANK2,TTN
GO Component	GO:0005640	Nuclear outer membrane	2	28	1.58	0.0451	DMPK,SYNE1
GO Component	GO:0043232	Intracellular non-membrane-bounded organelle	18	4880	0.29	0.0476	KANSL1,SCN1A,MYH7,ANK2,RYR1,DMD,CDC42BPB,RYR2,SYNE1,LMNA,SPTAN1,ARX,DLG4,MECP2,SPTBN2,TTN,GAN,NEB
GO Reactome
Reactome	HSA-445095	Interaction between L1 and Ankyrins	7	31	2023-08-02	1.23e-09	SCN1A,ANK2,KCNQ2,SPTAN1,SCN9A,SCN4A,SPTBN2
Reactome	HSA-373760	L1CAM interactions	8	119	1.55	8.89e-08	SCN1A,ANK2,KCNQ2,SPTAN1,DLG4,SCN9A,SCN4A,SPTBN2
Reactome	HSA-397014	Muscle contraction	8	193	1.34	2.30e-06	SCN1A,DMPK,RYR1,DMD,RYR2,SCN9A,SCN4A,TTN
Reactome	HSA-5576891	Cardiac conduction	6	126	2023-04-01	8.84e-05	SCN1A,DMPK,RYR1,RYR2,SCN9A,SCN4A
Reactome	HSA-5576892	Phase 0 - rapid depolarisation	3	32	2023-07-01	0.0121	SCN1A,SCN9A,SCN4A
Reactome	HSA-2672351	Stimuli-sensing channels	4	105	2023-03-01	0.0141	ANO10,RYR1,RYR2,UNC80
Reactome	HSA-112316	Neuronal System	6	406	0.89	0.0268	SLC6A1,ABCC8,GABRB3,KCNQ2,CACNA1B,DLG4
Reactome	HSA-5578775	Ion homeostasis	3	54	1.47	0.0367	DMPK,RYR1,RYR2

## Sheet: Enrichment subnetwork4
#category	term ID	term description	observed gene count	background gene count	strength	false discovery rate	matching proteins in your network (labels)
GO Process	GO:0019752	Carboxylic acid metabolic process	21	853	1.24	3.89e-19	ACO2,GCDH,SDHA,MCCC1,MMAA,ACAD9,BCKDHB,SHMT2,MCCC2,ECHS1,ACADSB,ACADM,ALDOB,PCCA,HADHA,GLDC,HLCS,ALDH7A1,BTD,PCCB,ACSF3
GO Process	GO:0046395	Carboxylic acid catabolic process	15	260	1.61	1.12e-17	GCDH,MCCC1,MMAA,BCKDHB,SHMT2,MCCC2,ECHS1,ACADSB,ACADM,PCCA,HADHA,GLDC,ALDH7A1,PCCB,ACSF3
GO Process	GO:0044281	Small molecule metabolic process	23	1684	0.98	5.01e-17	ACO2,GCDH,ATP5E,SDHA,MCCC1,MMAA,ACAD9,BCKDHB,SHMT2,MCCC2,ECHS1,ACADSB,ACADM,ALDOB,PCCA,HADHA,GLDC,HLCS,MMACHC,ALDH7A1,BTD,PCCB,ACSF3
GO Process	GO:0044282	Small molecule catabolic process	16	424	1.42	1.39e-16	GCDH,MCCC1,MMAA,BCKDHB,SHMT2,MCCC2,ECHS1,ACADSB,ACADM,ALDOB,PCCA,HADHA,GLDC,ALDH7A1,PCCB,ACSF3
GO Process	GO:0032787	Monocarboxylic acid metabolic process	15	515	1.31	1.09e-13	GCDH,MCCC1,MMAA,ACAD9,MCCC2,ECHS1,ACADSB,ACADM,ALDOB,PCCA,HADHA,HLCS,BTD,PCCB,ACSF3
GO Process	GO:0006767	Water-soluble vitamin metabolic process	9	83	1.88	6.80e-12	MCCC1,MMAA,SHMT2,MCCC2,PCCA,HLCS,MMACHC,BTD,PCCB
GO Process	GO:0055114	Oxidation-reduction process	16	939	2023-08-01	2.02e-11	ACO2,GCDH,NDUFB3,SDHA,NDUFB9,NDUFAF2,ACAD9,BCKDHB,ECHS1,ACADSB,ACADM,ALDOB,HADHA,GLDC,MMACHC,ALDH7A1
GO Process	GO:0006768	Biotin metabolic process	6	9	2.67	2.78e-11	MCCC1,MCCC2,PCCA,HLCS,BTD,PCCB
GO Process	GO:0009063	Cellular amino acid catabolic process	8	124	1.65	9.39e-09	GCDH,MCCC1,BCKDHB,SHMT2,MCCC2,ACADSB,GLDC,ALDH7A1
GO Process	GO:0006631	Fatty acid metabolic process	10	311	1.35	1.12e-08	GCDH,MMAA,ACAD9,ECHS1,ACADSB,ACADM,PCCA,HADHA,PCCB,ACSF3
GO Process	GO:0009062	Fatty acid catabolic process	7	93	1.72	6.77e-08	GCDH,MMAA,ECHS1,ACADM,PCCA,HADHA,PCCB
GO Process	GO:0044237	Cellular metabolic process	27	7513	0.4	8.72e-08	ACO2,GCDH,NDUFB3,ATP5E,SDHA,MCCC1,NDUFB9,MMAA,NDUFAF2,ACAD9,BCKDHB,SHMT2,MCCC2,ECHS1,ACADSB,ACADM,ALDOB,PCCA,HADHA,GLDC,LIPT1,HLCS,MMACHC,ALDH7A1,BTD,PCCB,ACSF3
GO Process	GO:1901575	Organic substance catabolic process	16	1750	0.81	1.43e-07	GCDH,MCCC1,MMAA,BCKDHB,SHMT2,MCCC2,ECHS1,ACADSB,ACADM,ALDOB,PCCA,HADHA,GLDC,ALDH7A1,PCCB,ACSF3
GO Process	GO:0006790	Sulfur compound metabolic process	9	355	1.25	8.17e-07	GCDH,MCCC1,MCCC2,PCCA,HLCS,MMACHC,BTD,PCCB,ACSF3
GO Process	GO:1901606	Alpha-amino acid catabolic process	6	104	1.61	4.98e-06	GCDH,MCCC1,SHMT2,MCCC2,GLDC,ALDH7A1
GO Process	GO:0009083	Branched-chain amino acid catabolic process	4	22	2023-01-02	2.41e-05	MCCC1,BCKDHB,MCCC2,ACADSB
GO Process	GO:0032981	Mitochondrial respiratory chain complex i assembly	5	66	1.72	2.41e-05	NDUFB3,NDUFB9,NDUFAF2,ACAD9,TMEM126B
GO Process	GO:0043603	Cellular amide metabolic process	10	773	0.96	2.86e-05	GCDH,MCCC1,SHMT2,MCCC2,PCCA,HLCS,MMACHC,BTD,PCCB,ACSF3
GO Process	GO:0006091	Generation of precursor metabolites and energy	8	405	1.14	3.24e-05	ACO2,NDUFB3,ATP5E,SDHA,NDUFB9,NDUFAF2,ALDOB,GLDC
GO Process	GO:0006629	Lipid metabolic process	11	1190	0.81	0.00014	GCDH,MMAA,ACAD9,ECHS1,ACADSB,ACADM,PCCA,HADHA,LIPT1,PCCB,ACSF3
GO Process	GO:0019626	Short-chain fatty acid catabolic process	3	9	2.37	0.00020	MMAA,PCCA,PCCB
GO Process	GO:0071704	Organic substance metabolic process	24	7755	0.33	0.00024	ACO2,GCDH,ATP5E,SDHA,MCCC1,MMAA,ACAD9,BCKDHB,SHMT2,MCCC2,ECHS1,ACADSB,ACADM,ALDOB,PCCA,HADHA,GLDC,LIPT1,HLCS,MMACHC,ALDH7A1,BTD,PCCB,ACSF3
GO Process	GO:0006635	Fatty acid beta-oxidation	4	56	2023-07-01	0.00051	GCDH,ECHS1,ACADM,HADHA
GO Process	GO:0045333	Cellular respiration	5	158	1.34	0.00099	ACO2,NDUFB3,SDHA,NDUFB9,NDUFAF2
GO Process	GO:0022900	Electron transport chain	5	174	2023-03-01	0.0015	NDUFB3,SDHA,NDUFB9,NDUFAF2,GLDC
GO Process	GO:1901564	Organonitrogen compound metabolic process	19	5244	0.4	0.0020	GCDH,ATP5E,MCCC1,MMAA,BCKDHB,SHMT2,MCCC2,ACADSB,ACADM,ALDOB,PCCA,GLDC,LIPT1,HLCS,MMACHC,ALDH7A1,BTD,PCCB,ACSF3
GO Process	GO:0034641	Cellular nitrogen compound metabolic process	15	3282	0.5	0.0027	GCDH,ATP5E,MCCC1,SHMT2,MCCC2,ACADM,ALDOB,PCCA,LIPT1,HLCS,MMACHC,ALDH7A1,BTD,PCCB,ACSF3
GO Process	GO:0046034	ATP metabolic process	5	204	1.23	0.0029	NDUFB3,ATP5E,SDHA,NDUFB9,ALDOB
GO Process	GO:0044238	Primary metabolic process	22	7332	0.32	0.0030	ACO2,GCDH,ATP5E,SDHA,MCCC1,MMAA,ACAD9,BCKDHB,SHMT2,MCCC2,ECHS1,ACADSB,ACADM,ALDOB,PCCA,HADHA,GLDC,LIPT1,HLCS,ALDH7A1,PCCB,ACSF3
GO Process	GO:0022904	Respiratory electron transport chain	4	107	1.42	0.0046	NDUFB3,SDHA,NDUFB9,NDUFAF2
GO Process	GO:0006119	Oxidative phosphorylation	4	118	1.37	0.0066	NDUFB3,ATP5E,SDHA,NDUFB9
GO Process	GO:0007005	Mitochondrion organization	6	452	0.97	0.0095	NDUFB3,ATP5E,NDUFB9,NDUFAF2,ACAD9,TMEM126B
GO Process	GO:0006552	Leucine catabolic process	2	6	2.37	0.0133	MCCC1,MCCC2
GO Process	GO:0046483	Heterocycle metabolic process	13	2840	0.5	0.0133	GCDH,ATP5E,MCCC1,MMAA,SHMT2,MCCC2,ALDOB,PCCA,HLCS,MMACHC,BTD,PCCB,ACSF3
GO Process	GO:0009150	Purine ribonucleotide metabolic process	5	303	2023-06-01	0.0159	GCDH,ATP5E,MCCC2,ALDOB,ACSF3
GO Process	GO:0006578	Amino-acid betaine biosynthetic process	2	7	2023-03-02	0.0162	ACADM,ALDH7A1
GO Process	GO:0006575	Cellular modified amino acid metabolic process	4	180	1.19	0.0267	SHMT2,ACADM,MMACHC,ALDH7A1
GO Process	GO:0033539	Fatty acid beta-oxidation using acyl-coa dehydrogenase	2	10	2.15	0.0267	GCDH,ACADM
GO Process	GO:0051791	Medium-chain fatty acid metabolic process	2	11	2023-01-02	0.0301	ACAD9,ACADM
GO Process	GO:1901360	Organic cyclic compound metabolic process	13	3118	0.46	0.0301	GCDH,ATP5E,MCCC1,MMAA,SHMT2,MCCC2,ALDOB,PCCA,HLCS,MMACHC,BTD,PCCB,ACSF3
GO Process	GO:0006554	Lysine catabolic process	2	12	2023-07-02	0.0340	GCDH,ALDH7A1
GO Process	GO:0009071	Serine family amino acid catabolic process	2	14	2.0	0.0435	SHMT2,GLDC
GO Process	GO:0006544	Glycine metabolic process	2	15	1.97	0.0485	SHMT2,GLDC
GO Function	GO:0003824	Catalytic activity	27	5486	0.54	8.52e-11	ACO2,GCDH,NDUFB3,ATP5E,SDHA,MCCC1,NDUFB9,MMAA,NDUFAF2,ACAD9,BCKDHB,SHMT2,MCCC2,ECHS1,ACADSB,ACADM,ALDOB,PCCA,HADHA,GLDC,LIPT1,HLCS,MMACHC,ALDH7A1,BTD,PCCB,ACSF3
GO Function	GO:0016491	Oxidoreductase activity	13	726	2023-01-01	1.01e-08	GCDH,NDUFB3,SDHA,NDUFB9,NDUFAF2,ACAD9,BCKDHB,ACADSB,ACADM,HADHA,GLDC,MMACHC,ALDH7A1
GO Function	GO:0016421	CoA carboxylase activity	4	6	2.67	7.51e-07	MCCC1,MCCC2,PCCA,PCCB
GO Function	GO:0016874	Ligase activity	7	156	2023-05-01	1.56e-06	ATP5E,MCCC1,MCCC2,PCCA,HLCS,PCCB,ACSF3
GO Function	GO:0050660	Flavin adenine dinucleotide binding	6	82	1.71	1.56e-06	GCDH,SDHA,ACAD9,ACADSB,ACADM,MMACHC
GO Function	GO:0036094	Small molecule binding	17	2516	0.67	1.80e-06	GCDH,SDHA,MCCC1,MMAA,ACAD9,SHMT2,MCCC2,ACADSB,ACADM,ALDOB,PCCA,HADHA,GLDC,HLCS,MMACHC,PCCB,ACSF3
GO Function	GO:0003995	acyl-CoA dehydrogenase activity	4	11	2.41	1.82e-06	GCDH,ACAD9,ACADSB,ACADM
GO Function	GO:0016627	Oxidoreductase activity, acting on the ch-ch group of donors	5	59	1.77	1.06e-05	GCDH,SDHA,ACAD9,ACADSB,ACADM
GO Function	GO:0019842	Vitamin binding	6	142	1.47	1.78e-05	MCCC1,SHMT2,PCCA,GLDC,HLCS,MMACHC
GO Function	GO:1901681	Sulfur compound binding	7	262	1.27	2.32e-05	GCDH,MCCC1,ACAD9,PCCA,HADHA,HLCS,MMACHC
GO Function	GO:0009374	Biotin binding	3	5	2.62	3.93e-05	MCCC1,PCCA,HLCS
GO Function	GO:0043168	Anion binding	16	2805	0.6	4.40e-05	GCDH,SDHA,MCCC1,MMAA,ACAD9,SHMT2,MCCC2,ACADSB,ACADM,PCCA,HADHA,GLDC,HLCS,MMACHC,PCCB,ACSF3
GO Function	GO:0016829	Lyase activity	6	184	1.36	5.60e-05	ACO2,SHMT2,ECHS1,ALDOB,HADHA,GLDC
GO Function	GO:0000166	Nucleotide binding	14	2119	0.66	6.19e-05	GCDH,SDHA,MCCC1,MMAA,ACAD9,MCCC2,ACADSB,ACADM,PCCA,HADHA,HLCS,MMACHC,PCCB,ACSF3
GO Function	GO:0033218	Amide binding	7	369	2023-12-01	0.00014	GCDH,MCCC1,ACAD9,PCCA,HADHA,HLCS,MMACHC
GO Function	GO:0000062	fatty-acyl-CoA binding	3	21	2.0	0.00093	GCDH,ACAD9,HADHA
GO Function	GO:0004485	methylcrotonoyl-CoA carboxylase activity	2	2	2.84	0.0019	MCCC1,MCCC2
GO Function	GO:0004658	propionyl-CoA carboxylase activity	2	2	2.84	0.0019	PCCA,PCCB
GO Function	GO:0031406	Carboxylic acid binding	5	218	2023-02-01	0.0020	MCCC1,SHMT2,PCCA,GLDC,HLCS
GO Function	GO:0070991	medium-chain-acyl-CoA dehydrogenase activity	2	3	2.67	0.0025	ACAD9,ACADM
GO Function	GO:0008137	NADH dehydrogenase (ubiquinone) activity	3	46	1.66	0.0057	NDUFB3,NDUFB9,NDUFAF2
GO Function	GO:0016836	Hydro-lyase activity	3	57	1.57	0.0095	ACO2,ECHS1,HADHA
GO Function	GO:0004300	enoyl-CoA hydratase activity	2	9	2.19	0.0112	ECHS1,HADHA
GO Function	GO:0016832	Aldehyde-lyase activity	2	10	2.15	0.0130	SHMT2,ALDOB
GO Function	GO:0032555	Purine ribonucleotide binding	10	1864	0.57	0.0160	GCDH,MCCC1,MMAA,ACAD9,MCCC2,PCCA,HADHA,HLCS,PCCB,ACSF3
GO Function	GO:0032559	Adenyl ribonucleotide binding	9	1522	0.62	0.0160	GCDH,MCCC1,ACAD9,MCCC2,PCCA,HADHA,HLCS,PCCB,ACSF3
GO Function	GO:0009055	Electron transfer activity	3	103	1.31	0.0370	SDHA,NDUFAF2,GLDC
GO Component	GO:0005739	Mitochondrion	26	1611	2023-05-01	4.23e-23	ACO2,GCDH,NDUFB3,ATP5E,SDHA,MCCC1,NDUFB9,MMAA,NDUFAF2,ACAD9,BCKDHB,SHMT2,MCCC2,TMEM126B,ECHS1,ACADSB,ACADM,PCCA,HADHA,GLDC,LIPT1,HLCS,ALDH7A1,BTD,PCCB,ACSF3
GO Component	GO:0005759	Mitochondrial matrix	19	479	1.44	1.68e-21	ACO2,GCDH,ATP5E,MCCC1,MMAA,BCKDHB,SHMT2,MCCC2,ECHS1,ACADSB,ACADM,PCCA,HADHA,GLDC,LIPT1,ALDH7A1,BTD,PCCB,ACSF3
GO Component	GO:0098798	Mitochondrial protein complex	8	262	1.33	1.63e-06	NDUFB3,ATP5E,SDHA,MCCC1,NDUFB9,BCKDHB,MCCC2,HADHA
GO Component	GO:0005743	Mitochondrial inner membrane	9	480	2023-12-01	6.71e-06	NDUFB3,ATP5E,SDHA,NDUFB9,NDUFAF2,ACAD9,SHMT2,TMEM126B,HADHA
GO Component	GO:0031966	Mitochondrial membrane	10	722	0.99	1.21e-05	NDUFB3,ATP5E,SDHA,NDUFB9,NDUFAF2,ACAD9,SHMT2,TMEM126B,ACADM,HADHA
GO Component	GO:0005737	Cytoplasm	28	11428	0.23	6.23e-05	ACO2,GCDH,NDUFB3,ATP5E,SDHA,MCCC1,NDUFB9,MMAA,NDUFAF2,ACAD9,BCKDHB,SHMT2,MCCC2,TMEM126B,ECHS1,ACADSB,ACADM,ALDOB,PCCA,HADHA,GLDC,LIPT1,HLCS,MMACHC,ALDH7A1,BTD,PCCB,ACSF3
GO Component	GO:1990204	Oxidoreductase complex	5	107	1.51	9.32e-05	NDUFB3,SDHA,NDUFB9,BCKDHB,GLDC
GO Component	GO:0070013	Intracellular organelle lumen	21	5857	0.4	0.00020	ACO2,GCDH,ATP5E,SDHA,MCCC1,MMAA,BCKDHB,SHMT2,MCCC2,ECHS1,ACADSB,ACADM,PCCA,HADHA,GLDC,LIPT1,HLCS,ALDH7A1,BTD,PCCB,ACSF3
GO Component	GO:0002169	3-methylcrotonyl-CoA carboxylase complex, mitochondrial	2	2	2.84	0.0013	MCCC1,MCCC2
GO Component	GO:0098800	Inner mitochondrial membrane protein complex	4	131	1.33	0.0037	NDUFB3,ATP5E,SDHA,NDUFB9
GO Component	GO:0043227	Membrane-bounded organelle	27	12427	0.18	0.0047	ACO2,GCDH,NDUFB3,ATP5E,SDHA,MCCC1,NDUFB9,MMAA,NDUFAF2,ACAD9,BCKDHB,SHMT2,MCCC2,TMEM126B,ECHS1,ACADSB,ACADM,ALDOB,PCCA,HADHA,GLDC,LIPT1,HLCS,ALDH7A1,BTD,PCCB,ACSF3
GO Component	GO:0043229	Intracellular organelle	27	12528	0.18	0.0054	ACO2,GCDH,NDUFB3,ATP5E,SDHA,MCCC1,NDUFB9,MMAA,NDUFAF2,ACAD9,BCKDHB,SHMT2,MCCC2,TMEM126B,ECHS1,ACADSB,ACADM,ALDOB,PCCA,HADHA,GLDC,LIPT1,HLCS,ALDH7A1,BTD,PCCB,ACSF3
GO Component	GO:0098803	Respiratory chain complex	3	80	1.42	0.0172	NDUFB3,SDHA,NDUFB9
GO Component	GO:0005746	Mitochondrial respirasome	3	84	2023-04-01	0.0189	NDUFB3,SDHA,NDUFB9
Reactome	HSA-1430728	Metabolism	28	2089	0.97	1.61e-24	ACO2,GCDH,NDUFB3,ATP5E,SDHA,MCCC1,NDUFB9,MMAA,NDUFAF2,ACAD9,BCKDHB,SHMT2,MCCC2,TMEM126B,ECHS1,ACADSB,ACADM,ALDOB,PCCA,HADHA,GLDC,LIPT1,HLCS,MMACHC,ALDH7A1,BTD,PCCB,ACSF3
Reactome	HSA-3296482	Defects in vitamin and cofactor metabolism	8	22	2.41	3.60e-14	MCCC1,MMAA,MCCC2,PCCA,HLCS,MMACHC,BTD,PCCB
Reactome	HSA-3323169	Defects in biotin (Btn) metabolism	6	8	2.72	1.03e-11	MCCC1,MCCC2,PCCA,HLCS,BTD,PCCB
Reactome	HSA-196780	Biotin transport and metabolism	6	11	2.58	3.19e-11	MCCC1,MCCC2,PCCA,HLCS,BTD,PCCB
Reactome	HSA-196849	Metabolism of water-soluble vitamins and cofactors	9	123	1.71	5.84e-11	MCCC1,MMAA,SHMT2,MCCC2,PCCA,HLCS,MMACHC,BTD,PCCB
Reactome	HSA-3371599	Defective HLCS causes multiple carboxylase deficiency	5	7	2023-07-02	1.16e-09	MCCC1,MCCC2,PCCA,HLCS,PCCB
Reactome	HSA-77289	Mitochondrial Fatty Acid Beta-Oxidation	6	37	2023-05-02	7.66e-09	MMAA,ECHS1,ACADM,PCCA,HADHA,PCCB
Reactome	HSA-5668914	Diseases of metabolism	9	244	1.41	1.16e-08	MCCC1,MMAA,MCCC2,ALDOB,PCCA,HLCS,MMACHC,BTD,PCCB
Reactome	HSA-1428517	The citric acid (TCA) cycle and respiratory electron transport	8	176	2023-05-01	2.98e-08	ACO2,NDUFB3,ATP5E,SDHA,NDUFB9,NDUFAF2,ACAD9,TMEM126B
Reactome	HSA-70895	Branched-chain amino acid catabolism	5	21	2.22	5.20e-08	MCCC1,BCKDHB,MCCC2,ECHS1,ACADSB
Reactome	HSA-163200	Respiratory electron transport, ATP synthesis by chemiosmotic coupling, and heat production by uncoupling proteins.	7	125	1.59	1.02e-07	NDUFB3,ATP5E,SDHA,NDUFB9,NDUFAF2,ACAD9,TMEM126B
Reactome	HSA-71291	Metabolism of amino acids and derivatives	9	365	1.24	2.56e-07	GCDH,MCCC1,BCKDHB,MCCC2,ECHS1,ACADSB,GLDC,LIPT1,ALDH7A1
Reactome	HSA-8978868	Fatty acid metabolism	7	175	1.45	8.28e-07	MMAA,ECHS1,ACADM,PCCA,HADHA,PCCB,ACSF3
Reactome	HSA-611105	Respiratory electron transport	6	101	1.62	1.14e-06	NDUFB3,SDHA,NDUFB9,NDUFAF2,ACAD9,TMEM126B
Reactome	HSA-6799198	Complex I biogenesis	5	55	2023-08-01	2.87e-06	NDUFB3,NDUFB9,NDUFAF2,ACAD9,TMEM126B
Reactome	HSA-71032	Propionyl-CoA catabolism	3	5	2.62	1.86e-05	MMAA,PCCA,PCCB
Reactome	HSA-77348	Beta oxidation of octanoyl-CoA to hexanoyl-CoA	3	5	2.62	1.86e-05	ECHS1,ACADM,HADHA
Reactome	HSA-77346	Beta oxidation of decanoyl-CoA to octanoyl-CoA-CoA	3	6	2.54	2.50e-05	ECHS1,ACADM,HADHA
Reactome	HSA-389661	Glyoxylate metabolism and glycine degradation	3	31	1.83	0.0016	BCKDHB,GLDC,LIPT1
Reactome	HSA-77310	Beta oxidation of lauroyl-CoA to decanoyl-CoA-CoA	2	5	2.45	0.0041	ECHS1,HADHA
Reactome	HSA-77350	Beta oxidation of hexanoyl-CoA to butanoyl-CoA	2	5	2.45	0.0041	ECHS1,HADHA
Reactome	HSA-77288	Mitochondrial fatty acid beta-oxidation of unsaturated fatty acids	2	6	2.37	0.0050	ACADM,HADHA
Reactome	HSA-71064	Lysine catabolism	2	12	2023-07-02	0.0148	GCDH,ALDH7A1
Reactome	HSA-3296469	Defects in cobalamin (B12) metabolism	2	14	2.0	0.0181	MMAA,MMACHC
Reactome	HSA-196741	Cobalamin (Cbl, vitamin B12) transport and metabolism	2	21	1.82	0.0366	MMAA,MMACHC
Reactome	HSA-71403	Citric acid cycle (TCA cycle)	2	22	2023-08-01	0.0386	ACO2,SDHA

## Sheet: Enrichment subnetwork5
#category	term ID	term description	observed gene count	background gene count	strength	false discovery rate	matching proteins in your network (labels)
GO Process	GO:0006590	Thyroid hormone generation	3	17	2.33	0.0065	TPO,FOXE1,DUOX2
GO Process	GO:0018958	Phenol-containing compound metabolic process	4	86	1.75	0.0065	TPO,FOXE1,PAH,DUOX2
GO Process	GO:0007605	Sensory perception of sound	4	153	2023-05-01	0.0214	WFS1,SLC26A4,COL11A2,GJB2
GO Process	GO:1990573	Potassium ion import across plasma membrane	3	43	1.93	0.0214	ABCC9,KCNJ1,SLC12A1
GO Process	GO:0060023	Soft palate development	2	5	2.69	0.0241	COL11A2,FOXE1
GO Component	GO:0005887	Integral component of plasma membrane	8	1623	0.78	0.0271	ABCC9,SLC26A4,TPO,BSND,GJB2,KCNJ1,TSHR,DUOX2

## Sheet: Enrichment subnetwork6
#category	term ID	term description	observed gene count	background gene count	strength	false discovery rate	matching proteins in your network (labels)
GO Process	GO:0006665	Sphingolipid metabolic process	7	153	1.81	5.28e-08	ARSA,GALC,HEXA,SMPD1,COL4A3BP,ASAH1,NAGA
GO Process	GO:0006687	Glycosphingolipid metabolic process	6	62	2.13	5.28e-08	ARSA,GALC,HEXA,SMPD1,ASAH1,NAGA
GO Process	GO:0006672	Ceramide metabolic process	5	87	2023-09-01	8.51e-06	GALC,SMPD1,COL4A3BP,ASAH1,NAGA
GO Process	GO:0030149	Sphingolipid catabolic process	4	29	2.29	1.21e-05	GALC,SMPD1,ASAH1,NAGA
GO Process	GO:1901135	Carbohydrate derivative metabolic process	8	987	2023-05-01	0.00014	ARSA,GALC,HEXA,SGSH,SMPD1,HGSNAT,ASAH1,NAGA
GO Process	GO:1901136	Carbohydrate derivative catabolic process	5	183	1.58	0.00019	GALC,HEXA,SGSH,HGSNAT,NAGA
GO Process	GO:0046514	Ceramide catabolic process	3	18	2.37	0.00045	GALC,ASAH1,NAGA
GO Process	GO:1901565	Organonitrogen compound catabolic process	7	1070	0.96	0.0036	GALC,HEXA,SGSH,SMPD1,HGSNAT,ASAH1,NAGA
GO Process	GO:1901564	Organonitrogen compound metabolic process	12	5244	0.5	0.0066	ARSA,ATP7B,GALC,CP,HEXA,TBCK,SGSH,SMPD1,HGSNAT,COL4A3BP,ASAH1,NAGA
GO Process	GO:0006027	Glycosaminoglycan catabolic process	3	61	1.84	0.0089	HEXA,SGSH,HGSNAT
GO Process	GO:0046477	Glycosylceramide catabolic process	2	6	2.67	0.0095	GALC,NAGA
GO Process	GO:0030148	Sphingolipid biosynthetic process	3	93	1.65	0.0257	SMPD1,COL4A3BP,ASAH1
GO Process	GO:0006825	Copper ion transport	2	18	2.19	0.0460	ATP7B,CP
GO Function	GO:0016798	Hydrolase activity, acting on glycosyl bonds	4	131	1.63	0.0066	GALC,HEXA,SMPD1,NAGA
GO Component	GO:0005764	Lysosome	10	698	2023-03-01	5.36e-09	ARSA,GALC,CP,HEXA,FLCN,SGSH,SMPD1,HGSNAT,ASAH1,NAGA
GO Component	GO:0043202	Lysosomal lumen	6	96	1.94	2.12e-08	ARSA,GALC,HEXA,SGSH,SMPD1,ASAH1
Reactome	HSA-428157	Sphingolipid metabolism	6	87	1.98	6.17e-08	ARSA,GALC,HEXA,SMPD1,COL4A3BP,ASAH1
Reactome	HSA-1660662	Glycosphingolipid metabolism	5	45	2.19	1.89e-07	ARSA,GALC,HEXA,SMPD1,ASAH1
Reactome	HSA-1430728	Metabolism	8	2089	0.73	0.0154	ARSA,GALC,HEXA,SGSH,SMPD1,HGSNAT,COL4A3BP,ASAH1
Reactome	HSA-2206281	Mucopolysaccharidoses	2	11	2.41	0.0160	SGSH,HGSNAT
Reactome	HSA-1630316	Glycosaminoglycan metabolism	3	123	1.53	0.0326	HEXA,SGSH,HGSNAT
Reactome	HSA-2024096	HS-GAG degradation	2	22	2023-01-02	0.0403	SGSH,HGSNAT

## Sheet: Enrichment subnetwork7
#category	term ID	term description	observed gene count	background gene count	strength	false discovery rate	matching proteins in your network (labels)
GO Process	GO:0009225	Nucleotide-sugar metabolic process	5	37	2.28	9.00e-07	TGDS,PMM2,GMPPB,GALT,DPAGT1
GO Process	GO:1901135	Carbohydrate derivative metabolic process	10	987	1.15	9.00e-07	TGDS,ALG1,SRD5A3,PMM2,GMPPB,FKRP,B3GALNT2,GALT,DPAGT1,GPI
GO Process	GO:0006486	Protein glycosylation	6	240	1.54	4.38e-05	ALG1,SRD5A3,PMM2,FKRP,B3GALNT2,DPAGT1
GO Process	GO:1901137	Carbohydrate derivative biosynthetic process	7	602	1.21	0.00014	ALG1,SRD5A3,PMM2,GMPPB,FKRP,B3GALNT2,DPAGT1
GO Process	GO:0006487	Protein n-linked glycosylation	4	77	1.86	0.00038	ALG1,SRD5A3,PMM2,DPAGT1
GO Process	GO:0006488	Dolichol-linked oligosaccharide biosynthetic process	3	20	2.32	0.00066	ALG1,SRD5A3,DPAGT1
GO Process	GO:0055086	Nucleobase-containing small molecule metabolic process	6	508	1.22	0.00085	TGDS,PMM2,GMPPB,GALT,DPAGT1,GPI
GO Process	GO:0019318	Hexose metabolic process	4	157	1.55	0.0041	PMM2,FBN1,GALT,GPI
GO Process	GO:0044281	Small molecule metabolic process	8	1684	0.82	0.0052	TGDS,SRD5A3,PMM2,GMPPB,FBN1,GALT,DPAGT1,GPI
GO Process	GO:0009298	GDP-mannose biosynthetic process	2	4	2.84	0.0061	PMM2,GMPPB
GO Process	GO:0019348	Dolichol metabolic process	2	5	2.75	0.0080	SRD5A3,DPAGT1
GO Process	GO:0006489	Dolichyl diphosphate biosynthetic process	2	7	2023-06-02	0.0122	SRD5A3,DPAGT1
Reactome	HSA-446193	Biosynthesis of the N-glycan precursor (dolichol lipid-linked oligosaccharide, LLO) and transfer to a nascent protein	5	77	1.96	4.81e-06	ALG1,SRD5A3,PMM2,GMPPB,DPAGT1
Reactome	HSA-3781865	Diseases of glycosylation	5	141	2023-07-01	4.43e-05	ALG1,SRD5A3,PMM2,GALT,DPAGT1
Reactome	HSA-5609975	Diseases associated with glycosylation precursor biosynthesis	3	18	2.37	0.00028	SRD5A3,PMM2,GALT
Reactome	HSA-446205	Synthesis of GDP-mannose	2	5	2.75	0.0036	PMM2,GMPPB
Reactome	HSA-446219	Synthesis of substrates in N-glycan biosythesis	3	62	1.83	0.0038	SRD5A3,PMM2,GMPPB
Reactome	HSA-597592	Post-translational protein modification	7	1390	0.85	0.0055	ALG1,SRD5A3,PMM2,GMPPB,FBN1,B3GALNT2,DPAGT1
Reactome	HSA-3781860	Diseases associated with N-glycosylation of proteins	2	17	2.22	0.0195	ALG1,DPAGT1
WikiPathways	WP4521	Glycosylation and related congenital defects	5	25	2.45	7.99e-09	ALG1,SRD5A3,PMM2,GMPPB,DPAGT1

## Sheet: Enrichment subnetwork8
#category	term ID	term description	observed gene count	background gene count	strength	false discovery rate	matching proteins in your network (labels)
GO Process	GO:0007031	Peroxisome organization	6	79	2.13	3.27e-08	PEX1,PHYH,PEX10,PEX6,PEX2,PEX11B
GO Process	GO:0016558	Protein import into peroxisome matrix	4	13	2.74	8.22e-07	PEX1,PEX10,PEX6,PEX2
GO Process	GO:0006625	Protein targeting to peroxisome	5	68	2023-12-02	1.22e-06	PEX1,PHYH,PEX10,PEX6,PEX2
GO Process	GO:0072594	Establishment of protein localization to organelle	6	433	1.39	6.03e-05	PEX1,PHYH,PEX10,PEX6,PEX2,DNM1
GO Process	GO:0015031	Protein transport	7	1486	0.92	0.0032	PEX1,PHYH,PTPN23,PEX10,PEX6,PEX2,DNM1
GO Process	GO:0006996	Organelle organization	9	3450	0.67	0.0044	PEX1,TRIM37,PHYH,PTPN23,PEX10,PEX6,PEX2,PEX11B,DNM1
GO Process	GO:0019395	Fatty acid oxidation	3	80	1.82	0.0076	PHYH,ALDH3A2,PEX2
GO Process	GO:0001561	Fatty acid alpha-oxidation	2	9	2023-06-02	0.0088	PHYH,ALDH3A2
GO Process	GO:0009062	Fatty acid catabolic process	3	93	1.76	0.0098	PHYH,ALDH3A2,PEX2
GO Process	GO:0046907	Intracellular transport	6	1520	0.85	0.0334	PEX1,PHYH,PTPN23,PEX10,PEX6,PEX2
GO Process	GO:0051649	Establishment of localization in cell	7	2375	0.72	0.0366	PEX1,PHYH,PTPN23,PEX10,PEX6,PEX2,DNM1
GO Function	GO:0008022	Protein c-terminus binding	4	199	1.55	0.0113	PEX1,PEX10,PEX6,DNM1
GO Component	GO:0005777	Peroxisome	8	138	2023-01-02	2.17e-12	PEX1,TRIM37,PHYH,PEX10,PEX6,ALDH3A2,PEX2,PEX11B
GO Component	GO:0005778	Peroxisomal membrane	6	60	2.25	3.00e-10	PEX1,PEX10,PEX6,ALDH3A2,PEX2,PEX11B
GO Component	GO:0005779	Integral component of peroxisomal membrane	3	16	2.52	4.32e-05	PEX10,PEX2,PEX11B
Reactome	HSA-9609507	Protein localization	7	160	1.89	2.02e-09	PEX1,PHYH,PEX10,PEX6,ALDH3A2,PEX2,PEX11B
Reactome	HSA-9033241	Peroxisomal protein import	5	61	2.16	1.84e-07	PEX1,PHYH,PEX10,PEX6,PEX2
Reactome	HSA-9603798	Class I peroxisomal membrane protein import	3	20	2.43	0.00017	ALDH3A2,PEX2,PEX11B
Reactome	HSA-389599	Alpha-oxidation of phytanate	2	6	2.77	0.0044	PHYH,ALDH3A2
