# Supplementary material for: Developing a cluster-based approach for deciphering complexity in individuals with neurodevelopmental differences
Source: Front Pediatr. 2023 Sep 18;11:1171920. doi: 10.3389/fped.2023.1171920 (PMC10543689; doi:10.3389/fped.2023.1171920)
Supplement: Supplementary file 6 [file Table6.xlsx]

## Sheet: MCL clusters specific cluster4
#clustering method	cluster number	cluster color	gene count	protein name	protein description
MCL	1	Red	47	ACTB	Actin, cytoplasmic 1; Actins are highly conserved proteins that are involved in various types of cell motility and are ubiquitously expressed in all eukaryotic cells
MCL	1	Red	47	ADA	Adenosine deaminase; Catalyzes the hydrolytic deamination of adenosine and 2- deoxyadenosine. Plays an important role in purine metabolism and in adenosine homeostasis. Modulates signaling by extracellular adenosine, and so contributes indirectly to cellular signaling events. Acts as a positive regulator of T-cell coactivation, by binding DPP4. Its interaction with DPP4 regulates lymphocyte- epit…
MCL	1	Red	47	ALB	Serum albumin; Serum albumin, the main protein of plasma, has a good binding capacity for water, Ca(2+), Na(+), K(+), fatty acids, hormones, bilirubin and drugs. Its main function is the regulation of the colloidal osmotic pressure of blood. Major zinc transporter in plasma, typically binds about 80% of all plasma zinc; Belongs to the ALB/AFP/VDB family
MCL	1	Red	47	ALMS1	ALMS1, centrosome and basal body associated protein; Alstrom syndrome protein 1; Involved in PCM1-dependent intracellular transport. Required, directly or indirectly, for the localization of NCAPD2 to the proximal ends of centrioles. Required for proper formation and/or maintenance of primary cilia (PC), microtubule-based structures that protrude from the surface of epithelial cells
MCL	1	Red	47	ANKRD11	Ankyrin repeat domain-containing protein 11; Chromatin regulator which modulates histone acetylation and gene expression in neural precursor cells (By similarity). May recruit histone deacetylases (HDACs) to the p160 coactivators/nuclear receptor complex to inhibit ligand-dependent transactivation. Has a role in proliferation and development of cortical neural precursors. May also regulate bone h…
MCL	1	Red	47	ASXL1	Additional sex combs like 1, transcriptional regulator; Putative Polycomb group protein ASXL1; Probable Polycomb group (PcG) protein involved in transcriptional regulation mediated by ligand-bound nuclear hormone receptors, such as retinoic acid receptors (RARs) and peroxisome proliferator-activated receptor gamma (PPARG). Acts as coactivator of RARA and RXRA through association with NCOA1. Acts …
MCL	1	Red	47	CDK13	Cyclin-dependent kinase 13; Cyclin-dependent kinase which displays CTD kinase activity and is required for RNA splicing. Has CTD kinase activity by hyperphosphorylating the C-terminal heptapeptide repeat domain (CTD) of the largest RNA polymerase II subunit RPB1, thereby acting as a key regulator of transcription elongation. Required for RNA splicing, probably by phosphorylating SRSF1/SF2. Requir…
MCL	1	Red	47	CDT1	DNA replication factor Cdt1; Required for both DNA replication and mitosis. DNA replication licensing factor, required for pre-replication complex assembly. Cooperates with CDC6 and the origin recognition complex (ORC) during G1 phase of the cell cycle to promote the loading of the mini-chromosome maintenance (MCM) complex onto DNA to generate pre-replication complexes (pre- RC). Required also fo…
MCL	1	Red	47	CERS1	annotation not available
MCL	1	Red	47	CLTCL1	Clathrin heavy chain like 1; Clathrin heavy chain 2; Clathrin is the major protein of the polyhedral coat of coated pits and vesicles. Two different adapter protein complexes link the clathrin lattice either to the plasma membrane or to the trans-Golgi network (By similarity)
MCL	1	Red	47	CREBBP	CREB-binding protein; Acetylates histones, giving a specific tag for transcriptional activation. Also acetylates non-histone proteins, like NCOA3 and FOXO1. Binds specifically to phosphorylated CREB and enhances its transcriptional activity toward cAMP-responsive genes. Acts as a coactivator of ALX1. Acts as a circadian transcriptional coactivator which enhances the activity of the circadian tran…
MCL	1	Red	47	DNAJC6	Dnaj heat shock protein family (hsp40) member c6; Putative tyrosine-protein phosphatase auxilin; Recruits HSPA8/HSC70 to clathrin-coated vesicles and promotes uncoating of clathrin-coated vesicles. Plays a role in clathrin-mediated endocytosis in neurons (By similarity); C2 tensin-type domain containing
MCL	1	Red	47	DNM1L	Dynamin-1-like protein; Functions in mitochondrial and peroxisomal division. Mediates membrane fission through oligomerization into membrane- associated tubular structures that wrap around the scission site to constrict and sever the mitochondrial membrane through a GTP hydrolysis-dependent mechanism. Through its function in mitochondrial division, ensures the survival of at least some types of p…
MCL	1	Red	47	DPH1	2-(3-amino-3-carboxypropyl)histidine synthase subunit 1; Required for the first step in the synthesis of diphthamide, a post-translational modification of histidine which occurs in translation elongation factor 2 (EEF2). When overexpressed, suppresses colony formation ability and growth rate of ovarian cancer cells. Acts also as a tumor suppressor in lung and breast cancers (By similarity). Plays…
MCL	1	Red	47	DUOXA2	Dual oxidase maturation factor 2; Required for the maturation and the transport from the endoplasmic reticulum to the plasma membrane of functional DUOX2. May play a role in thyroid hormone synthesis; Belongs to the DUOXA family
MCL	1	Red	47	HDAC8	Histone deacetylase 8; Responsible for the deacetylation of lysine residues on the N-terminal part of the core histones (H2A, H2B, H3 and H4). Histone deacetylation gives a tag for epigenetic repression and plays an important role in transcriptional regulation, cell cycle progression and developmental events. Histone deacetylases act via the formation of large multiprotein complexes. Also involve…
MCL	1	Red	47	HTRA2	Serine protease HTRA2, mitochondrial; Serine protease that shows proteolytic activity against a non-specific substrate beta-casein. Promotes or induces cell death either by direct binding to and inhibition of BIRC proteins (also called inhibitor of apoptosis proteins, IAPs), leading to an increase in caspase activity, or by a BIRC inhibition-independent, caspase-independent and serine protease ac…
MCL	1	Red	47	IYD	Iodotyrosine deiodinase 1; Catalyzes the oxidative NADPH-dependent deiodination of monoiodotyrosine (L-MIT) or diiodotyrosine (L-DIT). Acts during the hydrolysis of thyroglobulin to liberate iodide, which can then reenter the hormone-producing pathways. Acts more efficiently on monoiodotyrosine than on diiodotyrosine; Belongs to the nitroreductase family
MCL	1	Red	47	KAT6A	Histone acetyltransferase KAT6A; Histone acetyltransferase that acetylates lysine residues in histone H3 and histone H4 (in vitro). Component of the MOZ/MORF complex which has a histone H3 acetyltransferase activity. May act as a transcriptional coactivator for RUNX1 and RUNX2. Acetylates p53/TP53 at 'Lys-120' and 'Lys-382' and controls its transcriptional activity via association with PML; MYST …
MCL	1	Red	47	KIT	Mast/stem cell growth factor receptor Kit; Tyrosine-protein kinase that acts as cell-surface receptor for the cytokine KITLG/SCF and plays an essential role in the regulation of cell survival and proliferation, hematopoiesis, stem cell maintenance, gametogenesis, mast cell development, migration and function, and in melanogenesis. In response to KITLG/SCF binding, KIT can activate several signali…
MCL	1	Red	47	KMT2A	[histone h3]-lysine4 n-trimethyltransferase mll1; Histone-lysine N-methyltransferase 2A; Histone methyltransferase that plays an essential role in early development and hematopoiesis. Catalytic subunit of the MLL1/MLL complex, a multiprotein complex that mediates both methylation of 'Lys-4' of histone H3 (H3K4me) complex and acetylation of 'Lys-16' of histone H4 (H4K16ac). In the MLL1/MLL complex…
MCL	1	Red	47	KMT2D	[histone h3]-lysine4 n-trimethyltransferase mll2; Histone-lysine N-methyltransferase 2D; Histone methyltransferase. Methylates 'Lys-4' of histone H3 (H3K4me). H3K4me represents a specific tag for epigenetic transcriptional activation. Acts as a coactivator for estrogen receptor by being recruited by ESR1, thereby activating transcription; Belongs to the class V-like SAM-binding methyltransferase …
MCL	1	Red	47	LEMD3	Inner nuclear membrane protein Man1; Can function as a specific repressor of TGF-beta, activin, and BMP signaling through its interaction with the R-SMAD proteins. Antagonizes TGF-beta-induced cell proliferation arrest; LEM domain containing
MCL	1	Red	47	LZTR1	Leucine-zipper-like transcriptional regulator 1; Probable transcriptional regulator that may play a crucial role in embryogenesis; BTB domain containing
MCL	1	Red	47	MFN2	Mitofusin-2; Mitochondrial outer membrane GTPase that mediates mitochondrial clustering and fusion. Mitochondria are highly dynamic organelles, and their morphology is determined by the equilibrium between mitochondrial fusion and fission events. Overexpression induces the formation of mitochondrial networks. Membrane clustering requires GTPase activity and may involve a major rearrangement of th…
MCL	1	Red	47	MTOR	Serine/threonine-protein kinase mTOR; Serine/threonine protein kinase which is a central regulator of cellular metabolism, growth and survival in response to hormones, growth factors, nutrients, energy and stress signals. MTOR directly or indirectly regulates the phosphorylation of at least 800 proteins. Functions as part of 2 structurally and functionally distinct signaling complexes mTORC1 and …
MCL	1	Red	47	NF1	Neurofibromin; Stimulates the GTPase activity of Ras. NF1 shows greater affinity for Ras GAP, but lower specific activity. May be a regulator of Ras activity; Armadillo-like helical domain containing
MCL	1	Red	47	NOTCH3	Neurogenic locus notch homolog protein 3; Functions as a receptor for membrane-bound ligands Jagged1, Jagged2 and Delta1 to regulate cell-fate determination. Upon ligand activation through the released notch intracellular domain (NICD) it forms a transcriptional activator complex with RBPJ/RBPSUH and activates genes of the enhancer of split locus. Affects the implementation of differentiation, pr…
MCL	1	Red	47	OPA1	Dynamin-like 120 kDa protein, mitochondrial; Dynamin-related GTPase that is essential for normal mitochondrial morphology by regulating the equilibrium between mitochondrial fusion and mitochondrial fission. Coexpression of isoform 1 with shorter alternative products is required for optimal activity in promoting mitochondrial fusion. Binds lipid membranes enriched in negatively charged phospholip…
MCL	1	Red	47	PPP2R1A	Serine/threonine-protein phosphatase 2A 65 kDa regulatory subunit A alpha isoform; The PR65 subunit of protein phosphatase 2A serves as a scaffolding molecule to coordinate the assembly of the catalytic subunit and a variable regulatory B subunit. Upon interaction with GNA12 promotes dephosphorylation of microtubule associated protein TAU/MAPT. Required for proper chromosome segregation and for c…
MCL	1	Red	47	PSEN2	Presenilin-2; Probable catalytic subunit of the gamma-secretase complex, an endoprotease complex that catalyzes the intramembrane cleavage of integral membrane proteins such as Notch receptors and APP (amyloid-beta precursor protein). Requires the other members of the gamma-secretase complex to have a protease activity. May play a role in intracellular signaling and gene expression or in linking …
MCL	1	Red	47	PTCH1	Protein patched homolog 1; Acts as a receptor for sonic hedgehog (SHH), indian hedgehog (IHH) and desert hedgehog (DHH). Associates with the smoothened protein (SMO) to transduce the hedgehog's proteins signal. Seems to have a tumor suppressor function, as inactivation of this protein is probably a necessary, if not sufficient step for tumorigenesis; Belongs to the patched family
MCL	1	Red	47	PTPN11	Tyrosine-protein phosphatase non-receptor type 11; Acts downstream of various receptor and cytoplasmic protein tyrosine kinases to participate in the signal transduction from the cell surface to the nucleus. Positively regulates MAPK signal transduction pathway. Dephosphorylates GAB1, ARHGAP35 and EGFR. Dephosphorylates ROCK2 at 'Tyr-722' resulting in stimulatation of its RhoA binding activity. D…
MCL	1	Red	47	RET	Proto-oncogene tyrosine-protein kinase receptor Ret; Receptor tyrosine-protein kinase involved in numerous cellular mechanisms including cell proliferation, neuronal navigation, cell migration, and cell differentiation upon binding with glial cell derived neurotrophic factor family ligands. Phosphorylates PTK2/FAK1. Regulates both cell death/survival balance and positional information. Required f…
MCL	1	Red	47	SETD1A	Histone-lysine N-methyltransferase SETD1A; Histone methyltransferase that specifically methylates 'Lys-4' of histone H3, when part of the SET1 histone methyltransferase (HMT) complex, but not if the neighboring 'Lys- 9' residue is already methylated. H3 'Lys-4' methylation represents a specific tag for epigenetic transcriptional activation. The non-overlapping localization with SETD1B suggests th…
MCL	1	Red	47	SHH	Sonic hedgehog protein; Sonic hedgehog protein: The C-terminal part of the sonic hedgehog protein precursor displays an autoproteolysis and a cholesterol transferase activity (By similarity). Both activities result in the cleavage of the full-length protein into two parts (ShhN and ShhC) followed by the covalent attachment of a cholesterol moiety to the C-terminal of the newly generated ShhN (By …
MCL	1	Red	47	SIX3	Homeobox protein SIX3; Transcriptional regulator which can act as both a transcriptional repressor and activator by binding a ATTA homeodomain core recognition sequence on these target genes. During forebrain development represses WNT1 expression allowing zona limitans intrathalamica formation and thereby ensuring proper anterio-posterior patterning of the diencephalon and formation of the rostra…
MCL	1	Red	47	SLC18A2	Mfs transporter, dha1 family, solute carrier family 18 (vesicular amine transporter), member 1/2; Synaptic vesicular amine transporter; Involved in the ATP-dependent vesicular transport of biogenic amine neurotransmitters. Pumps cytosolic monoamines including dopamine, norepinephrine, serotonin, and histamine into synaptic vesicles. Requisite for vesicular amine storage prior to secretion via exo…
MCL	1	Red	47	SLC25A46	Solute carrier family 25 member 46; May play a role in mitochondrial dynamics by controlling mitochondrial membrane fission; Belongs to the mitochondrial carrier (TC 2.A.29) family
MCL	1	Red	47	SMAD4	Mothers against decapentaplegic homolog 4; In muscle physiology, plays a central role in the balance between atrophy and hypertrophy. When recruited by MSTN, promotes atrophy response via phosphorylated SMAD2/4. MSTN decrease causes SMAD4 release and subsequent recruitment by the BMP pathway to promote hypertrophy via phosphorylated SMAD1/5/8. Acts synergistically with SMAD1 and YY1 in bone morph…
MCL	1	Red	47	SOD1	Superoxide dismutase, cu-zn family; Superoxide dismutase [Cu-Zn]; Destroys radicals which are normally produced within the cells and which are toxic to biological systems
MCL	1	Red	47	SOX3	Transcription factor SOX-3; Transcription factor required during the formation of the hypothalamo-pituitary axis. May function as a switch in neuronal development. Keeps neural cells undifferentiated by counteracting the activity of proneural proteins and suppresses neuronal differentiation. Required also within the pharyngeal epithelia for craniofacial morphogenesis. Controls a genetic switch in…
MCL	1	Red	47	SPRED2	Sprouty-related, EVH1 domain-containing protein 2; Negatively regulates Ras signaling pathways and downstream activation of MAP kinases
MCL	1	Red	47	TCF4	Transcription factor 4; Transcription factor that binds to the immunoglobulin enchancer Mu-E5/KE5-motif. Involved in the initiation of neuronal differentiation. Activates transcription by binding to the E box (5'-CANNTG-3'). Binds to the E-box present in the somatostatin receptor 2 initiator element (SSTR2-INR) to activate transcription (By similarity). Preferentially binds to either 5'-ACANNTGT-…
MCL	1	Red	47	TG	Thyroglobulin; Precursor of the iodinated thyroid hormones thyroxine (T4) and triiodothyronine (T3); Belongs to the type-B carboxylesterase/lipase family
MCL	1	Red	47	TGFBR2	Transforming growth factor beta receptor 2; TGF-beta receptor type-2; Transmembrane serine/threonine kinase forming with the TGF-beta type I serine/threonine kinase receptor, TGFBR1, the non- promiscuous receptor for the TGF-beta cytokines TGFB1, TGFB2 and TGFB3. Transduces the TGFB1, TGFB2 and TGFB3 signal from the cell surface to the cytoplasm and is thus regulating a plethora of physiological …
MCL	1	Red	47	WT1	Wilms tumor protein; Transcription factor that plays an important role in cellular development and cell survival. Recognizes and binds to the DNA sequence 5'-GCG(T/G)GGGCG-3'. Regulates the expression of numerous target genes, including EPO. Plays an essential role for development of the urogenital system. It has a tumor suppressor as well as an oncogenic role in tumor formation. Function may be …
MCL	2	Salmon	26	AIMP1	Aminoacyl tRNA synthase complex-interacting multifunctional protein 1; Non-catalytic component of the multisynthase complex. Stimulates the catalytic activity of cytoplasmic arginyl-tRNA synthase. Binds tRNA. Possesses inflammatory cytokine activity. Negatively regulates TGF-beta signaling through stabilization of SMURF2 by binding to SMURF2 and inhibiting its SMAD7-mediated degradation. Involved…
MCL	2	Salmon	26	ASNS	Asparagine synthetase (glutamine-hydrolyzing); Asparagine synthetase
MCL	2	Salmon	26	BBS10	Bardet-Biedl syndrome 10 protein; Probable molecular chaperone. Assists the folding of proteins upon ATP hydrolysis. As part of the BBS/CCT complex may play a role in the assembly of BBSome, a complex involved in ciliogenesis regulating transports vesicles to the cilia. Involved in adipogenic differentiation; Belongs to the TCP-1 chaperonin family
MCL	2	Salmon	26	C12orf65	Probable peptide chain release factor C12orf65, mitochondrial; May act as a codon-independent translation release factor that has lost all stop codon specificity and directs the termination of translation in mitochondrion. May help rescuing stalled mitoribosomes during translation (By similarity)
MCL	2	Salmon	26	CARS2	Probable cysteine--tRNA ligase, mitochondrial; cysteinyl-tRNA synthetase 2, mitochondrial; Belongs to the class-I aminoacyl-tRNA synthetase family
MCL	2	Salmon	26	EFTUD2	116 kDa U5 small nuclear ribonucleoprotein component; Component of the U5 snRNP and the U4/U6-U5 tri-snRNP complex required for pre-mRNA splicing. Binds GTP; Belongs to the TRAFAC class translation factor GTPase superfamily. Classic translation factor GTPase family. EF-G/EF-2 subfamily
MCL	2	Salmon	26	ELAC2	Zinc phosphodiesterase ELAC protein 2; Zinc phosphodiesterase, which displays mitochondrial tRNA 3'-processing endonuclease activity. Involved in tRNA maturation, by removing a 3'-trailer from precursor tRNA
MCL	2	Salmon	26	EXOSC3	Exosome complex component RRP40; Non-catalytic component of the RNA exosome complex which has 3'->5' exoribonuclease activity and participates in a multitude of cellular RNA processing and degradation events. In the nucleus, the RNA exosome complex is involved in proper maturation of stable RNA species such as rRNA, snRNA and snoRNA, in the elimination of RNA processing by-products and non-coding…
MCL	2	Salmon	26	FARS2	Phenylalanine--tRNA ligase, mitochondrial; Is responsible for the charging of tRNA(Phe) with phenylalanine in mitochondrial translation. To a lesser extent, also catalyzes direct attachment of m-Tyr (an oxidized version of Phe) to tRNA(Phe), thereby opening the way for delivery of the misacylated tRNA to the ribosome and incorporation of ROS-damaged amino acid into proteins; Belongs to the class-…
MCL	2	Salmon	26	FBXL4	F-box and leucine rich repeat protein 4
MCL	2	Salmon	26	GFM1	Elongation factor G, mitochondrial; Mitochondrial GTPase that catalyzes the GTP-dependent ribosomal translocation step during translation elongation. During this step, the ribosome changes from the pre-translocational (PRE) to the post-translocational (POST) state as the newly formed A- site-bound peptidyl-tRNA and P-site-bound deacylated tRNA move to the P and E sites, respectively. Catalyzes th…
MCL	2	Salmon	26	IARS	Isoleucine--tRNA ligase, cytoplasmic; Catalyzes the specific attachment of an amino acid to its cognate tRNA in a 2 step reaction: the amino acid (AA) is first activated by ATP to form AA-AMP and then transferred to the acceptor end of the tRNA; Aminoacyl tRNA synthetases, Class I
MCL	2	Salmon	26	KARS	Lysine--tRNA ligase; Catalyzes the specific attachment of an amino acid to its cognate tRNA in a 2 step reaction: the amino acid (AA) is first activated by ATP to form AA-AMP and then transferred to the acceptor end of the tRNA. When secreted, acts as a signaling molecule that induces immune response through the activation of monocyte/macrophages. Catalyzes the synthesis of the signaling molecule…
MCL	2	Salmon	26	MTFMT	Methionyl-tRNA formyltransferase, mitochondrial; Formylates methionyl-tRNA in mitochondria. A single tRNA(Met) gene gives rise to both an initiator and an elongator species via an unknown mechanism (By similarity)
MCL	2	Salmon	26	NARS2	Probable asparagine--tRNA ligase, mitochondrial; asparaginyl-tRNA synthetase 2, mitochondrial; Belongs to the class-II aminoacyl-tRNA synthetase family
MCL	2	Salmon	26	PNPT1	Polyribonucleotide nucleotidyltransferase 1, mitochondrial; RNA-binding protein implicated in numerous RNA metabolic processes. Catalyzes the phosphorolysis of single-stranded polyribonucleotides processively in the 3'-to-5' direction. Mitochondrial intermembrane factor with RNA-processing exoribonulease activity. Component of the mitochondrial degradosome (mtEXO) complex, that degrades 3' overha…
MCL	2	Salmon	26	POLR1C	DNA-directed RNA polymerases I and III subunit RPAC1; DNA-dependent RNA polymerase catalyzes the transcription of DNA into RNA using the four ribonucleoside triphosphates as substrates. Common component of RNA polymerases I and III which synthesize ribosomal RNA precursors and small RNAs, such as 5S rRNA and tRNAs, respectively. RPAC1 is part of the Pol core element with the central large cleft a…
MCL	2	Salmon	26	RARS2	Probable arginine--tRNA ligase, mitochondrial; arginyl-tRNA synthetase 2, mitochondrial; Aminoacyl tRNA synthetases, Class I
MCL	2	Salmon	26	SARS2	Serine--tRNA ligase, mitochondrial; Catalyzes the attachment of serine to tRNA(Ser). Is also probably able to aminoacylate tRNA(Sec) with serine, to form the misacylated tRNA L-seryl-tRNA(Sec), which will be further converted into selenocysteinyl-tRNA(Sec); Aminoacyl tRNA synthetases, Class II
MCL	2	Salmon	26	SLC6A9	Solute carrier family 6 (neurotransmitter transporter, glycine) member 5/9; Sodium- and chloride-dependent glycine transporter 1; Terminates the action of glycine by its high affinity sodium-dependent reuptake into presynaptic terminals. May play a role in regulation of glycine levels in NMDA receptor-mediated neurotransmission; Solute carriers
MCL	2	Salmon	26	TRIT1	tRNA dimethylallyltransferase; Catalyzes the transfer of a dimethylallyl group onto the adenine at position 37 of both cytosolic and mitochondrial tRNAs, leading to the formation of N6-(dimethylallyl)adenosine (i(6)A); Belongs to the IPP transferase family
MCL	2	Salmon	26	TRMT1	tRNA (guanine(26)-N(2))-dimethyltransferase; Dimethylates a single guanine residue at position 26 of most tRNAs using S-adenosyl-L-methionine as donor of the methyl groups; Belongs to the class I-like SAM-binding methyltransferase superfamily. Trm1 family
MCL	2	Salmon	26	TRMT5	tRNA (guanine(37)-N1)-methyltransferase; Involved in mitochondrial tRNA methylation. Specifically methylates the N1 position of guanosine-37 in various tRNAs. Methylation is not dependent on the nature of the nucleoside 5' of the target nucleoside. This is the first step in the biosynthesis of wybutosine (yW), a modified base adjacent to the anticodon of tRNAs and required for accurate decoding
MCL	2	Salmon	26	TSFM	Elongation factor Ts, mitochondrial; Associates with the EF-Tu.GDP complex and induces the exchange of GDP to GTP. It remains bound to the aminoacyl-tRNA.EF- Tu.GTP complex up to the GTP hydrolysis stage on the ribosome; Belongs to the EF-Ts family
MCL	2	Salmon	26	WARS2	Tryptophanyl trna synthetase 2, mitochondrial; Tryptophan--tRNA ligase, mitochondrial; Mitochondrial aminoacyl-tRNA synthetase that activate and transfer the amino acids to their corresponding tRNAs during the translation of mitochondrial genes and protein synthesis
MCL	2	Salmon	26	YARS2	Tyrosine--tRNA ligase, mitochondrial; Catalyzes the attachment of tyrosine to tRNA(Tyr) in a two-step reaction: tyrosine is first activated by ATP to form Tyr- AMP and then transferred to the acceptor end of tRNA(Tyr); Belongs to the class-I aminoacyl-tRNA synthetase family
MCL	3	Fire Brick	20	BCS1L	Mitochondrial chaperone BCS1; Chaperone necessary for the assembly of mitochondrial respiratory chain complex III. Plays an important role in the maintenance of mitochondrial tubular networks, respiratory chain assembly and formation of the LETM1 complex; AAA ATPases
MCL	3	Fire Brick	20	COX20	Cytochrome c oxidase protein 20 homolog; Mitochondrial respiratory chain complex assembly factors; Belongs to the COX20 family
MCL	3	Fire Brick	20	ETHE1	Persulfide dioxygenase ETHE1, mitochondrial; Sulfur dioxygenase that plays an essential role in hydrogen sulfide catabolism in the mitochondrial matrix. Hydrogen sulfide (H(2)S) is first oxidized by SQRDL, giving rise to cysteine persulfide residues. ETHE1 consumes molecular oxygen to catalyze the oxidation of the persulfide, once it has been transferred to a thiophilic acceptor, such as glutathi…
MCL	3	Fire Brick	20	IBA57	Iron-sulfur cluster assembly factor iba57; Putative transferase CAF17, mitochondrial; Involved in the maturation of mitochondrial 4Fe-4S proteins functioning late in the iron-sulfur cluster assembly pathway
MCL	3	Fire Brick	20	LIAS	Lipoyl synthase, mitochondrial; Catalyzes the radical-mediated insertion of two sulfur atoms into the C-6 and C-8 positions of the octanoyl moiety bound to the lipoyl domains of lipoate-dependent enzymes, thereby converting the octanoylated domains into lipoylated derivatives
MCL	3	Fire Brick	20	NDUFA9	NADH dehydrogenase [ubiquinone] 1 alpha subcomplex subunit 9, mitochondrial; Accessory subunit of the mitochondrial membrane respiratory chain NADH dehydrogenase (Complex I), that is believed not to be involved in catalysis. Complex I functions in the transfer of electrons from NADH to the respiratory chain. The immediate electron acceptor for the enzyme is believed to be ubiquinone; NADH:ubiquin…
MCL	3	Fire Brick	20	NDUFAF3	NADH dehydrogenase [ubiquinone] 1 alpha subcomplex assembly factor 3; Essential factor for the assembly of mitochondrial NADH:ubiquinone oxidoreductase complex (complex I)
MCL	3	Fire Brick	20	NDUFAF5	Nadh dehydrogenase [ubiquinone] 1 alpha subcomplex assembly factor 5; Arginine-hydroxylase NDUFAF5, mitochondrial; Arginine hydroxylase involved in the assembly of mitochondrial NADH:ubiquinone oxidoreductase complex (complex I, MT-ND1) at early stages. Acts by mediating hydroxylation of 'Arg-111' of NDUFS7. May also have methyltransferase activity (Probable)
MCL	3	Fire Brick	20	NDUFS4	NADH dehydrogenase [ubiquinone] iron-sulfur protein 4, mitochondrial; Accessory subunit of the mitochondrial membrane respiratory chain NADH dehydrogenase (Complex I), that is believed not to be involved in catalysis. Complex I functions in the transfer of electrons from NADH to the respiratory chain. The immediate electron acceptor for the enzyme is believed to be ubiquinone; NADH:ubiquinone oxi…
MCL	3	Fire Brick	20	NFU1	NFU1 iron-sulfur cluster scaffold homolog, mitochondrial; Iron-sulfur cluster scaffold protein which can assemble [4Fe-2S] clusters and deliver them to target proteins; Belongs to the NifU family
MCL	3	Fire Brick	20	NUBPL	Iron-sulfur protein NUBPL; Required for the assembly of the mitochondrial membrane respiratory chain NADH dehydrogenase (Complex I). May deliver of one or more Fe-S clusters to complex I subunits; Belongs to the Mrp/NBP35 ATP-binding proteins family
MCL	3	Fire Brick	20	RIPPLY2	Ripply transcriptional repressor 2; Protein ripply2; Plays a role in somitogenesis. Required for somite segregation and establishment of rostrocaudal polarity in somites (By similarity)
MCL	3	Fire Brick	20	SCO2	Protein SCO2 homolog, mitochondrial; Acts as a copper chaperone, transporting copper to the Cu(A) site on the cytochrome c oxidase subunit II (COX2); Mitochondrial respiratory chain complex assembly factors
MCL	3	Fire Brick	20	SDHB	Succinate dehydrogenase [ubiquinone] iron-sulfur subunit, mitochondrial; Iron-sulfur protein (IP) subunit of succinate dehydrogenase (SDH) that is involved in complex II of the mitochondrial electron transport chain and is responsible for transferring electrons from succinate to ubiquinone (coenzyme Q)
MCL	3	Fire Brick	20	SUOX	Sulfite oxidase, mitochondrial; Sulfite oxidase
MCL	3	Fire Brick	20	SURF1	SURF1, cytochrome c oxidase assembly factor; Surfeit locus protein 1; Component of the MITRAC (mitochondrial translation regulation assembly intermediate of cytochrome c oxidase complex) complex, that regulates cytochrome c oxidase assembly
MCL	3	Fire Brick	20	TTC19	Tetratricopeptide repeat protein 19, mitochondrial; Required for the preservation of the structural and functional integrity of mitochondrial respiratory complex III by allowing the physiological turnover of the Rieske protein UQCRFS1. Involved in the clearance of UQCRFS1 N-terminal fragments, which are produced upon incorporation of UQCRFS1 into the complex III and whose presence is detrimental …
MCL	3	Fire Brick	20	TYMP	Thymidine phosphorylase; May have a role in maintaining the integrity of the blood vessels. Has growth promoting activity on endothelial cells, angiogenic activity in vivo and chemotactic activity on endothelial cells in vitro; Minor histocompatibility antigens
MCL	3	Fire Brick	20	ZBTB18	Zinc finger and BTB domain-containing protein 18; Transcriptional repressor that plays a role in various developmental processes such as myogenesis and brain development. Plays a key role in myogenesis by directly repressing the expression of ID2 and ID3, 2 inhibitors of skeletal myogenesis. Also involved in controlling cell division of progenitor cells and regulating the survival of postmitotic …
MCL	3	Fire Brick	20	ZNF142	Zinc finger protein 142; May be involved in transcriptional regulation; Zinc fingers C2H2-type
MCL	4	Sandy Brown	19	ATP1A1	Sodium/potassium-transporting ATPase subunit alpha-1; This is the catalytic component of the active enzyme, which catalyzes the hydrolysis of ATP coupled with the exchange of sodium and potassium ions across the plasma membrane. This action creates the electrochemical gradient of sodium and potassium ions, providing the energy for active transport of various nutrients; ATPase Na+/K+ transporting …
MCL	4	Sandy Brown	19	CACNA1A	Voltage-dependent P/Q-type calcium channel subunit alpha-1A; Voltage-sensitive calcium channels (VSCC) mediate the entry of calcium ions into excitable cells and are also involved in a variety of calcium-dependent processes, including muscle contraction, hormone or neurotransmitter release, gene expression, cell motility, cell division and cell death. The isoform alpha-1A gives rise to P and/or Q…
MCL	4	Sandy Brown	19	CACNA1D	Voltage-dependent L-type calcium channel subunit alpha-1D; Voltage-sensitive calcium channels (VSCC) mediate the entry of calcium ions into excitable cells and are also involved in a variety of calcium-dependent processes, including muscle contraction, hormone or neurotransmitter release, gene expression, cell motility, cell division and cell death. The isoform alpha-1D gives rise to L-type calci…
MCL	4	Sandy Brown	19	CNTNAP1	Contactin-associated protein 1; Required, with CNTNAP2, for radial and longitudinal organization of myelinated axons. Plays a role in the formation of functional distinct domains critical for saltatory conduction of nerve impulses in myelinated nerve fibers. Demarcates the paranodal region of the axo-glial junction. In association with contactin involved in the signaling between axons and myelina…
MCL	4	Sandy Brown	19	CNTNAP2	Contactin-associated protein-like 2; Required, with CNTNAP1, for radial and longitudinal organization of myelinated axons. Plays a role in the formation of functional distinct domains critical for saltatory conduction of nerve impulses in myelinated nerve fibers. Demarcates the juxtaparanodal region of the axo-glial junction; Belongs to the neurexin family
MCL	4	Sandy Brown	19	DOCK3	Dedicator of cytokinesis protein 3; Potential guanine nucleotide exchange factor (GEF). GEF proteins activate some small GTPases by exchanging bound GDP for free GTP. Its interaction with presenilin proteins as well as its ability to stimulate Tau/MAPT phosphorylation suggest that it may be involved in Alzheimer disease. Ectopic expression in nerve cells decreases the secretion of amyloid-beta AP…
MCL	4	Sandy Brown	19	FRAS1	Fraser extracellular matrix complex subunit 1
MCL	4	Sandy Brown	19	GFAP	Glial fibrillary acidic protein; GFAP, a class-III intermediate filament, is a cell- specific marker that, during the development of the central nervous system, distinguishes astrocytes from other glial cells
MCL	4	Sandy Brown	19	GNB5	Guanine nucleotide-binding protein subunit beta-5; Enhances GTPase-activating protein (GAP) activity of regulator of G protein signaling (RGS) proteins, hence involved in the termination of the signaling initiated by the G protein coupled receptors (GPCRs) by accelerating the GTP hydrolysis on the G-alpha subunits, thereby promoting their inactivation (Probable). Increases RGS9 GTPase-activating …
MCL	4	Sandy Brown	19	GRIA1	Glutamate ionotropic receptor ampa type subunit 1; Glutamate receptor 1; Ionotropic glutamate receptor. L-glutamate acts as an excitatory neurotransmitter at many synapses in the central nervous system. Binding of the excitatory neurotransmitter L- glutamate induces a conformation change, leading to the opening of the cation channel, and thereby converts the chemical signal to an electrical impul…
MCL	4	Sandy Brown	19	GRIN2B	Glutamate receptor ionotropic, NMDA 2B; Component of NMDA receptor complexes that function as heterotetrameric, ligand-gated ion channels with high calcium permeability and voltage-dependent sensitivity to magnesium. Channel activation requires binding of the neurotransmitter glutamate to the epsilon subunit, glycine binding to the zeta subunit, plus membrane depolarization to eliminate channel i…
MCL	4	Sandy Brown	19	GRIP1	Glutamate receptor-interacting protein 1; May play a role as a localized scaffold for the assembly of a multiprotein signaling complex and as mediator of the trafficking of its binding partners at specific subcellular location in neurons. Through complex formation with NSG1, GRIA2 and STX12 controls the intracellular fate of AMPAR and the endosomal sorting of the GRIA2 subunit toward recycling an…
MCL	4	Sandy Brown	19	HOMER2	Homer protein homolog 2; Postsynaptic density scaffolding protein. Binds and cross-links cytoplasmic regions of GRM1, GRM5, ITPR1, DNM3, RYR1, RYR2, SHANK1 and SHANK3. By physically linking GRM1 and GRM5 with ER-associated ITPR1 receptors, it aids the coupling of surface receptors to intracellular calcium release. May also couple GRM1 to PI3 kinase through its interaction with AGAP2. Isoforms can…
MCL	4	Sandy Brown	19	ITPR1	Inositol 1,4,5-trisphosphate receptor type 1; Intracellular channel that mediates calcium release from the endoplasmic reticulum following stimulation by inositol 1,4,5- trisphosphate. Involved in the regulation of epithelial secretion of electrolytes and fluid through the interaction with AHCYL1 (By similarity). Plays a role in ER stress-induced apoptosis. Cytoplasmic calcium released from the E…
MCL	4	Sandy Brown	19	MYO9A	Unconventional myosin-IXa; Myosins are actin-based motor molecules with ATPase activity. Unconventional myosins serve in intracellular movements. Regulates Rho activity in neurons, has a role in the regulation of neuronal morphology and function (By similarity); Belongs to the TRAFAC class myosin-kinesin ATPase superfamily. Myosin family
MCL	4	Sandy Brown	19	NRXN3	Neurexin-3; Neuronal cell surface protein that may be involved in cell recognition and cell adhesion. May mediate intracellular signaling; Neurexins
MCL	4	Sandy Brown	19	RBFOX1	RNA binding protein fox-1 homolog 1; RNA-binding protein that regulates alternative splicing events by binding to 5'-UGCAUGU-3' elements. Regulates alternative splicing of tissue-specific exons and of differentially spliced exons during erythropoiesis
MCL	4	Sandy Brown	19	RELN	Reelin; Extracellular matrix serine protease that plays a role in layering of neurons in the cerebral cortex and cerebellum. Regulates microtubule function in neurons and neuronal migration. Affects migration of sympathetic preganglionic neurons in the spinal cord, where it seems to act as a barrier to neuronal migration. Enzymatic activity is important for the modulation of cell adhesion. Bindin…
MCL	4	Sandy Brown	19	SHANK2	SH3 and multiple ankyrin repeat domains protein 2; Seems to be an adapter protein in the postsynaptic density (PSD) of excitatory synapses that interconnects receptors of the postsynaptic membrane including NMDA-type and metabotropic glutamate receptors, and the actin-based cytoskeleton. May play a role in the structural and functional organization of the dendritic spine and synaptic junction; Be…
MCL	5	Brown	19	BBS12	Bardet-Biedl syndrome 12 protein; Probable molecular chaperone. Assists the folding of proteins upon ATP hydrolysis. As part of the BBS/CCT complex may play a role in the assembly of BBSome, a complex involved in ciliogenesis regulating transports vesicles to the cilia. Involved in adipogenic differentiation; Belongs to the TCP-1 chaperonin family. BBS12 subfamily
MCL	5	Brown	19	BBS5	Bardet-Biedl syndrome 5 protein; The BBSome complex is thought to function as a coat complex required for sorting of specific membrane proteins to the primary cilia. The BBSome complex is required for ciliogenesis but is dispensable for centriolar satellite function. This ciliogenic function is mediated in part by the Rab8 GDP/GTP exchange factor, which localizes to the basal body and contacts th…
MCL	5	Brown	19	CDK5RAP2	CDK5 regulatory subunit-associated protein 2; Potential regulator of CDK5 activity via its interaction with CDK5R1. Negative regulator of centriole disengagement (licensing) which maintains centriole engagement and cohesion. Involved in regulation of mitotic spindle orientation (By similarity). Plays a role in the spindle checkpoint activation by acting as a transcriptional regulator of both BUBR…
MCL	5	Brown	19	CENPJ	Centromere protein J; Plays an important role in cell division and centrosome function by participating in centriole duplication. Inhibits microtubule nucleation from the centrosome. Involved in the regulation of slow processive growth of centriolar microtubules. Acts as microtubule plus-end tracking protein that stabilizes centriolar microtubules and inhibits microtubule polymerization and exten…
MCL	5	Brown	19	CEP120	Centrosomal protein of 120 kDa; Plays a role in the microtubule-dependent coupling of the nucleus and the centrosome. Involved in the processes that regulate centrosome-mediated interkinetic nuclear migration (INM) of neural progenitors and for proper positioning of neurons during brain development. Also implicated in the migration and selfrenewal of neural progenitors. Required for centriole dup…
MCL	5	Brown	19	CEP164	Centrosomal protein of 164 kDa; Plays a role in microtubule organization and/or maintenance for the formation of primary cilia (PC), a microtubule-based structure that protrudes from the surface of epithelial cells. Plays a critical role in G2/M checkpoint and nuclear divisions. A key player in the DNA damage-activated ATR/ATM signaling cascade since it is required for the proper phosphorylation …
MCL	5	Brown	19	CEP41	Centrosomal protein of 41 kDa; Required during ciliogenesis for tubulin glutamylation in cilium. Probably acts by participating in the transport of TTLL6, a tubulin polyglutamylase, between the basal body and the cilium; Belongs to the CEP41 family
MCL	5	Brown	19	CSPP1	Centrosome and spindle pole-associated protein 1; May play a role in cell-cycle-dependent microtubule organization
MCL	5	Brown	19	DYNC2LI1	Cytoplasmic dynein 2 light intermediate chain 1; Required for correct intraflagellar transport (IFT), the bi-directional movement of particles required for the assembly, maintenance and functioning of primary cilia. Involved in the regulation of ciliary length; Dyneins, cytoplasmic
MCL	5	Brown	19	GPR161	G-protein coupled receptor 161; Key negative regulator of Shh signaling, which promotes the processing of GLI3 into GLI3R during neural tube development. Recruited by TULP3 and the IFT-A complex to primary cilia and acts as a regulator of the PKA-dependent basal repression machinery in Shh signaling by increasing cAMP levels, leading to promote the PKA-dependent processing of GLI3 into GLI3R and …
MCL	5	Brown	19	KIF7	Kinesin-like protein KIF7; Essential for hedgehog signaling regulation: acts as both a negative and positive regulator of sonic hedgehog (Shh) and Indian hedgehog (Ihh) pathways, acting downstream of SMO, through both SUFU-dependent and -independent mechanisms. Involved in the regulation of microtubular dynamics. Required for proper organization of the ciliary tip and control of ciliary localizat…
MCL	5	Brown	19	MCPH1	Microcephalin 1; Microcephalin; Implicated in chromosome condensation and DNA damage induced cellular responses. May play a role in neurogenesis and regulation of the size of the cerebral cortex
MCL	5	Brown	19	NPHP3	Nephrocystin-3; Required for normal ciliary development and function. Inhibits disheveled-1-induced canonical Wnt-signaling activity and may also play a role in the control of non-canonical Wnt signaling which regulates planar cell polarity. Probably acts as a molecular switch between different Wnt signaling pathways. Required for proper convergent extension cell movements
MCL	5	Brown	19	STIL	SCL-interrupting locus protein; Immediate-early gene. Plays an important role in embryonic development as well as in cellular growth and proliferation; its long-term silencing affects cell survival and cell cycle distribution as well as decreases CDK1 activity correlated with reduced phosphorylation of CDK1. Plays a role as a positive regulator of the sonic hedgehog pathway, acting downstream of …
MCL	5	Brown	19	TMEM231	Transmembrane protein 231; Transmembrane component of the tectonic-like complex, a complex localized at the transition zone of primary cilia and acting as a barrier that prevents diffusion of transmembrane proteins between the cilia and plasma membranes. Required for ciliogenesis and sonic hedgehog/SHH signaling (By similarity)
MCL	5	Brown	19	TUB	Tubby bipartite transcription factor; Tubby protein homolog; Functions in signal transduction from heterotrimeric G protein-coupled receptors. Binds to membranes containing phosphatidylinositol 4,5-bisphosphate. Can bind DNA (in vitro). May contribute to the regulation of transcription in the nucleus. Could be involved in the hypothalamic regulation of body weight (By similarity). Contribute to s…
MCL	5	Brown	19	TUBGCP6	Tubulin gamma complex associated protein 6; Gamma-tubulin complex component 6; Gamma-tubulin complex is necessary for microtubule nucleation at the centrosome
MCL	5	Brown	19	WDR19	WD repeat-containing protein 19; Component of the IFT complex A (IFT-A), a complex required for retrograde ciliary transport. Involved in cilia function and/or assembly (By similarity). Associates with the BBSome complex to mediate ciliary transport (By similarity); Intraflagellar transport proteins
MCL	5	Brown	19	ZNF335	Zinc finger protein 335; Component or associated component of some histone methyltransferase complexes may regulate transcription through recruitment of those complexes on gene promoters. Enhances ligand- dependent transcriptional activation by nuclear hormone receptors. Plays an important role in neural progenitor cell proliferation and self-renewal through the regulation of specific genes invol…
MCL	6	Yellow	17	CDHR1	Cadherin-related family member 1; Potential calcium-dependent cell-adhesion protein. May be required for the structural integrity of the outer segment (OS) of photoreceptor cells (By similarity); Cadherin related
MCL	6	Yellow	17	CLRN1	Clarin-1; May have a role in the excitatory ribbon synapse junctions between hair cells and cochlear ganglion cells and presumably also in analogous synapses within the retina; Belongs to the clarin family
MCL	6	Yellow	17	CNGA1	cGMP-gated cation channel alpha-1; Visual signal transduction is mediated by a G-protein coupled cascade using cGMP as second messenger. This protein can be activated by cyclic GMP which leads to an opening of the cation channel and thereby causing a depolarization of rod photoreceptors; Belongs to the cyclic nucleotide-gated cation channel (TC 1.A.1.5) family. CNGA1 subfamily
MCL	6	Yellow	17	CRB1	Protein crumbs homolog 1; Plays a role in photoreceptor morphogenesis in the retina. May maintain cell polarization and adhesion; Belongs to the Crumbs protein family
MCL	6	Yellow	17	CRB2	Crumbs 2, cell polarity complex component; Protein crumbs homolog 2; Apical polarity protein that plays a central role during the epithelial-to-mesenchymal transition (EMT) at gastrulation, when newly specified mesodermal cells move inside the embryo. Acts by promoting cell ingression, the process by which cells leave the epithelial epiblast and move inside the embryo to form a new tissue layer. …
MCL	6	Yellow	17	DCHS1	Protocadherin-16; Calcium-dependent cell-adhesion protein. Mediates functions in neuroprogenitor cell proliferation and differentiation. In the heart, has a critical role for proper morphogenesis of the mitral valve, acting in the regulation of cell migration involved in valve formation; Cadherin related
MCL	6	Yellow	17	FAM161A	Family with sequence similarity 161 member a; Protein FAM161A; Involved in ciliogenesis
MCL	6	Yellow	17	LCA5	LCA5, lebercilin; Lebercilin; Might be involved in minus end-directed microtubule transport
MCL	6	Yellow	17	MAK	Serine/threonine-protein kinase MAK; Essential for the regulation of ciliary length and required for the long-term survival of photoreceptors (By similarity). Phosphorylates FZR1 in a cell cycle-dependent manner. Plays a role in the transcriptional coactivation of AR. Could play an important function in spermatogenesis. May play a role in chromosomal stability in prostate cancer cells
MCL	6	Yellow	17	NMNAT1	Nicotinamide/nicotinic acid mononucleotide adenylyltransferase 1; Catalyzes the formation of NAD(+) from nicotinamide mononucleotide (NMN) and ATP. Can also use the deamidated form; nicotinic acid mononucleotide (NaMN) as substrate with the same efficiency. Can use triazofurin monophosphate (TrMP) as substrate. Also catalyzes the reverse reaction, i.e. the pyrophosphorolytic cleavage of NAD(+). F…
MCL	6	Yellow	17	PCDH15	Protocadherin-15; Calcium-dependent cell-adhesion protein. Essential for maintenance of normal retinal and cochlear function; Cadherin related
MCL	6	Yellow	17	PDE6A	Rod cGMP-specific 3',5'-cyclic phosphodiesterase subunit alpha; This protein participates in processes of transmission and amplification of the visual signal; Belongs to the cyclic nucleotide phosphodiesterase family
MCL	6	Yellow	17	PRPH2	Peripherin-2; May function as an adhesion molecule involved in stabilization and compaction of outer segment disks or in the maintenance of the curvature of the rim. It is essential for disk morphogenesis; Belongs to the PRPH2/ROM1 family
MCL	6	Yellow	17	RBP3	Retinol-binding protein 3; IRBP shuttles 11-cis and all trans retinoids between the retinol isomerase in the pigment epithelium and the visual pigments in the photoreceptor cells of the retina
MCL	6	Yellow	17	ROM1	Rod outer segment membrane protein 1; May function as an adhesion molecule involved in stabilization and compaction of outer segment disks or in the maintenance of the curvature of the rim. It is essential for disk morphogenesis; Tetraspanins
MCL	6	Yellow	17	RPE65	Retinoid isomerohydrolase / lutein isomerase; Retinoid isomerohydrolase; Critical isomerohydrolase in the retinoid cycle involved in regeneration of 11-cis-retinal, the chromophore of rod and cone opsins. Catalyzes the cleavage and isomerization of all-trans- retinyl fatty acid esters to 11-cis-retinol which is further oxidized by 11-cis retinol dehydrogenase to 11-cis-retinal for use as visual c…
MCL	6	Yellow	17	USH1C	Harmonin; Anchoring/scaffolding protein that is a part of the functional network formed by USH1C, USH1G, CDH23 and MYO7A that mediates mechanotransduction in cochlear hair cells. Required for normal development and maintenance of cochlear hair cell bundles (By similarity). As part of the intermicrovillar adhesion complex/IMAC plays a role in brush border differentiation, controlling microvilli or…
MCL	7	Dark Golden Rod	12	GBA	Glucosylceramidase that catalyzes, within the lysosomal compartment, the hydrolysis of glucosylceramide/GlcCer into free ceramide and glucose . Thereby, plays a central role in the degradation of complex lipids and the turnover of cellular membranes . Through the production of ceramides, participates to the PKC-activated salvage pathway of ceramide formation . Also plays a role in cholesterol met…
MCL	7	Dark Golden Rod	12	GNPTAB	N-acetylglucosamine-1-phosphotransferase subunits alpha/beta; Catalyzes the formation of mannose 6-phosphate (M6P) markers on high mannose type oligosaccharides in the Golgi apparatus. M6P residues are required to bind to the M6P receptors (MPR), which mediate the vesicular transport of lysosomal enzymes to the endosomal/prelysosomal compartment; EF-hand domain containing
MCL	7	Dark Golden Rod	12	IDUA	Alpha-L-iduronidase; Iduronidase, alpha-L-
MCL	7	Dark Golden Rod	12	KCTD7	Potassium channel tetramerization domain containing 7; BTB/POZ domain-containing protein KCTD7; May be involved in the control of excitability of cortical neurons
MCL	7	Dark Golden Rod	12	LIPA	Lysosomal acid lipase/cholesteryl ester hydrolase; Crucial for the intracellular hydrolysis of cholesteryl esters and triglycerides that have been internalized via receptor- mediated endocytosis of lipoprotein particles. Important in mediating the effect of LDL (low density lipoprotein) uptake on suppression of hydroxymethylglutaryl-CoA reductase and activation of endogenous cellular cholesteryl …
MCL	7	Dark Golden Rod	12	MANBA	Beta-mannosidase; Exoglycosidase that cleaves the single beta-linked mannose residue from the non-reducing end of all N-linked glycoprotein oligosaccharides; Mannosidases type beta
MCL	7	Dark Golden Rod	12	MFSD8	Major facilitator superfamily domain-containing protein 8; May be a carrier that transport small solutes by using chemiosmotic ion gradients; Belongs to the major facilitator superfamily
MCL	7	Dark Golden Rod	12	NAGLU	Alpha-N-acetylglucosaminidase; Involved in the degradation of heparan sulfate
MCL	7	Dark Golden Rod	12	NPC1	Niemann-Pick C1 protein; Intracellular cholesterol transporter which acts in concert with NPC2 and plays an important role in the egress of cholesterol from the endosomal/lysosomal compartment. Both NPC1 and NPC2 function as the cellular 'tag team duo' (TTD) to catalyze the mobilization of cholesterol within the multivesicular environment of the late endosome (LE) to effect egress through the lim…
MCL	7	Dark Golden Rod	12	NPC2	Epididymal secretory protein E1; Intracellular cholesterol transporter which acts in concert with NPC1 and plays an important role in the egress of cholesterol from the endosomal/lysosomal compartment. Both NPC1 and NPC2 function as the cellular 'tag team duo' (TTD) to catalyze the mobilization of cholesterol within the multivesicular environment of the late endosome (LE) to effect egress through…
MCL	7	Dark Golden Rod	12	PSAP	Prosaposin; Saposins are specific low-molecular mass non-enzymic proteins, they participate in the lysosomal degradation of sphingolipids, which takes place by the sequential action of specific hydrolases; Endogenous ligands
MCL	7	Dark Golden Rod	12	TPP1	Tripeptidyl-peptidase 1; Lysosomal serine protease with tripeptidyl-peptidase I activity. May act as a non-specific lysosomal peptidase which generates tripeptides from the breakdown products produced by lysosomal proteinases. Requires substrates with an unsubstituted N-terminus (By similarity)
MCL	8	Khaki	12	CDKL5	Cyclin-dependent kinase-like 5; Mediates phosphorylation of MECP2; Cilia and flagella associated
MCL	8	Khaki	12	EBP	3-beta-hydroxysteroid-Delta(8),Delta(7)-isomerase; Catalyzes the conversion of Delta(8)-sterols to their corresponding Delta(7)-isomers; Belongs to the EBP family
MCL	8	Khaki	12	FBXO11	F-box only protein 11; Substrate recognition component of a SCF (SKP1-CUL1-F- box protein) E3 ubiquitin-protein ligase complex which mediates the ubiquitination and subsequent proteasomal degradation of target proteins, such as DTL/CDT2, BCL6 and PRDM1/BLIMP1. The SCF(FBXO11) complex mediates ubiquitination and degradation of BCL6, thereby playing a role in the germinal center B-cells terminal di…
MCL	8	Khaki	12	KCNQ3	Potassium voltage-gated channel subfamily KQT member 3; Associates with KCNQ2 or KCNQ5 to form a potassium channel with essentially identical properties to the channel underlying the native M-current, a slowly activating and deactivating potassium conductance which plays a critical role in determining the subthreshold electrical excitability of neurons as well as the responsiveness to synaptic in…
MCL	8	Khaki	12	KCNT2	Potassium channel subfamily T member 2; Outward rectifying potassium channel. Produces rapidly activating outward rectifier K(+) currents. Activated by high intracellular sodium and chloride levels. Channel activity is inhibited by ATP and by inhalation anesthetics, such as isoflurane (By similarity). Inhibited upon stimulation of G-protein coupled receptors, such as CHRM1 and GRIA1; Belongs to t…
MCL	8	Khaki	12	PCDH19	Protocadherin-19; Potential calcium-dependent cell-adhesion protein; Non-clustered protocadherins
MCL	8	Khaki	12	PNKP	Bifunctional polynucleotide phosphatase/kinase; Plays a key role in the repair of DNA damage, functioning as part of both the non-homologous end-joining (NHEJ) and base excision repair (BER) pathways. Through its two catalytic activities, PNK ensures that DNA termini are compatible with extension and ligation by either removing 3'-phosphates from, or by phosphorylating 5'-hydroxyl groups on, the …
MCL	8	Khaki	12	PNPO	Pyridoxine-5'-phosphate oxidase; Catalyzes the oxidation of either pyridoxine 5'- phosphate (PNP) or pyridoxamine 5'-phosphate (PMP) into pyridoxal 5'-phosphate (PLP)
MCL	8	Khaki	12	PRMT7	Protein arginine N-methyltransferase 7; Arginine methyltransferase that can both catalyze the formation of omega-N monomethylarginine (MMA) and symmetrical dimethylarginine (sDMA), with a preference for the formation of MMA. Specifically mediates the symmetrical dimethylation of arginine residues in the small nuclear ribonucleoproteins Sm D1 (SNRPD1) and Sm D3 (SNRPD3); such methylation being req…
MCL	8	Khaki	12	SLC6A8	Solute carrier family 6 (neurotransmitter transporter, creatine) member 8; Sodium- and chloride-dependent creatine transporter 1; Required for the uptake of creatine in muscles and brain; Solute carriers
MCL	8	Khaki	12	TBC1D24	TBC1 domain family member 24; May act as a GTPase-activating protein for Rab family protein(s). Involved in neuronal projections development, probably through a negative modulation of ARF6 function; Deafness associated genes
MCL	8	Khaki	12	TDP2	Tyrosyl-DNA phosphodiesterase 2; DNA repair enzyme that can remove a variety of covalent adducts from DNA through hydrolysis of a 5'-phosphodiester bond, giving rise to DNA with a free 5' phosphate. Catalyzes the hydrolysis of dead-end complexes between DNA and the topoisomerase 2 (TOP2) active site tyrosine residue. The 5'-tyrosyl DNA phosphodiesterase activity can enable the repair of TOP2-indu…
MCL	9	Olive Drab	10	DKC1	H/ACA ribonucleoprotein complex subunit 4; Isoform 1: Required for ribosome biogenesis and telomere maintenance. Probable catalytic subunit of H/ACA small nucleolar ribonucleoprotein (H/ACA snoRNP) complex, which catalyzes pseudouridylation of rRNA. This involves the isomerization of uridine such that the ribose is subsequently attached to C5, instead of the normal N1. Each rRNA can contain up to…
MCL	9	Olive Drab	10	ERCC6	DNA excision repair protein ERCC-6; Essential factor involved in transcription-coupled nucleotide excision repair which allows RNA polymerase II-blocking lesions to be rapidly removed from the transcribed strand of active genes. Upon DNA-binding, it locally modifies DNA conformation by wrapping the DNA around itself, thereby modifying the interface between stalled RNA polymerase II and DNA. It is…
MCL	9	Olive Drab	10	FANCC	Fanconi anemia group C protein; DNA repair protein that may operate in a postreplication repair or a cell cycle checkpoint function. May be implicated in interstrand DNA cross-link repair and in the maintenance of normal chromosome stability. Upon IFNG induction, may facilitate STAT1 activation by recruiting STAT1 to IFNGR1; Fanconi anemia complementation groups
MCL	9	Olive Drab	10	FANCL	E3 ubiquitin-protein ligase FANCL; Ubiquitin ligase protein that mediates monoubiquitination of FANCD2 in the presence of UBE2T, a key step in the DNA damage pathway. Also mediates monoubiquitination of FANCI. May stimulate the ubiquitin release from UBE2W. May be required for proper primordial germ cell proliferation in the embryonic stage, whereas it is probably not needed for spermatogonial pr…
MCL	9	Olive Drab	10	FANCM	Fanconi anemia group M protein; DNA-dependent ATPase component of the Fanconi anemia (FA) core complex. Required for the normal activation of the FA pathway, leading to monoubiquitination of the FANCI-FANCD2 complex in response to DNA damage, cellular resistance to DNA cross-linking drugs, and prevention of chromosomal breakage. In complex with CENPS and CENPX, binds double-stranded DNA (dsDNA), …
MCL	9	Olive Drab	10	PARN	Poly(A)-specific ribonuclease PARN; 3'-exoribonuclease that has a preference for poly(A) tails of mRNAs, thereby efficiently degrading poly(A) tails. Exonucleolytic degradation of the poly(A) tail is often the first step in the decay of eukaryotic mRNAs and is also used to silence certain maternal mRNAs translationally during oocyte maturation and early embryonic development. Interacts with both …
MCL	9	Olive Drab	10	RAD50	DNA repair protein RAD50; Component of the MRN complex, which plays a central role in double-strand break (DSB) repair, DNA recombination, maintenance of telomere integrity and meiosis. The complex possesses single-strand endonuclease activity and double-strand- specific 3'-5' exonuclease activity, which are provided by MRE11. RAD50 may be required to bind DNA ends and hold them in close proximit…
MCL	9	Olive Drab	10	RAD51C	DNA repair protein RAD51 homolog 3; Essential for the homologous recombination (HR) pathway of DNA repair. Involved in the homologous recombination repair (HRR) pathway of double-stranded DNA breaks arising during DNA replication or induced by DNA-damaging agents. Part of the RAD21 paralog protein complexes BCDX2 and CX3 which act at different stages of the BRCA1-BRCA2-dependent HR pathway. Upon …
MCL	9	Olive Drab	10	RTEL1	Regulator of telomere elongation helicase 1; ATP-dependent DNA helicase implicated in telomere-length regulation, DNA repair and the maintenance of genomic stability. Acts as an anti-recombinase to counteract toxic recombination and limit crossover during meiosis. Regulates meiotic recombination and crossover homeostasis by physically dissociating strand invasion events and thereby promotes noncr…
MCL	9	Olive Drab	10	SMC1A	Structural maintenance of chromosomes protein 1A; Involved in chromosome cohesion during cell cycle and in DNA repair. Central component of cohesin complex. The cohesin complex is required for the cohesion of sister chromatids after DNA replication. The cohesin complex apparently forms a large proteinaceous ring within which sister chromatids can be trapped. At anaphase, the complex is cleaved an…
MCL	10	Green	9	DCAF17	DDB1- and CUL4-associated factor 17; May function as a substrate receptor for CUL4-DDB1 E3 ubiquitin-protein ligase complex; DDB1 and CUL4 associated factors
MCL	10	Green	9	DDX3X	ATP-dependent RNA helicase DDX3X; Multifunctional ATP-dependent RNA helicase. The ATPase activity can be stimulated by various ribo- and deoxynucleic acids indicative for a relaxed substrate specificity. In vitro can unwind partially double-stranded DNA with a preference for 5'- single-stranded DNA overhangs. Is involved in several steps of gene expression, such as transcription, mRNA maturation,…
MCL	10	Green	9	EIF3F	Eukaryotic translation initiation factor 3 subunit F; Component of the eukaryotic translation initiation factor 3 (eIF-3) complex, which is required for several steps in the initiation of protein synthesis. The eIF-3 complex associates with the 40S ribosome and facilitates the recruitment of eIF-1, eIF-1A, eIF-2:GTP:methionyl-tRNAi and eIF-5 to form the 43S pre- initiation complex (43S PIC). The …
MCL	10	Green	9	HNRNPU	Heterogeneous nuclear ribonucleoprotein U; DNA- and RNA-binding protein involved in several cellular processes such as nuclear chromatin organization, telomere-length regulation, transcription, mRNA alternative splicing and stability, Xist-mediated transcriptional silencing and mitotic cell progression. Plays a role in the regulation of interphase large-scale gene-rich chromatin organization thro…
MCL	10	Green	9	NBAS	Neuroblastoma-amplified sequence; Involved in Golgi-to-endoplasmic reticulum (ER) retrograde transport; the function is proposed to depend on its association in the NRZ complex which is believed to play a role in SNARE assembly at the ER
MCL	10	Green	9	PANK2	Pantothenate kinase 2, mitochondrial; May be the master regulator of the CoA biosynthesis; Belongs to the type II pantothenate kinase family
MCL	10	Green	9	RPS19	40S ribosomal protein S19; Required for pre-rRNA processing and maturation of 40S ribosomal subunits; Belongs to the eukaryotic ribosomal protein eS19 family
MCL	10	Green	9	UPF1	Regulator of nonsense transcripts 1; RNA-dependent helicase and ATPase required for nonsense- mediated decay (NMD) of mRNAs containing premature stop codons. Is recruited to mRNAs upon translation termination and undergoes a cycle of phosphorylation and dephosphorylation; its phosphorylation appears to be a key step in NMD. Recruited by release factors to stalled ribosomes together with the SMG1C…
MCL	10	Green	9	UPF3B	Regulator of nonsense transcripts 3B; Involved in nonsense-mediated decay (NMD) of mRNAs containing premature stop codons by associating with the nuclear exon junction complex (EJC) and serving as link between the EJC core and NMD machinery. Recruits UPF2 at the cytoplasmic side of the nuclear envelope and the subsequent formation of an UPF1-UPF2- UPF3 surveillance complex (including UPF1 bound t…
MCL	11	Cyan	8	AGL	Amylo-alpha-1, 6-glucosidase, 4-alpha-glucanotransferase; Glycogen debranching enzyme; Multifunctional enzyme acting as 1,4-alpha-D-glucan:1,4- alpha-D-glucan 4-alpha-D-glycosyltransferase and amylo-1,6- glucosidase in glycogen degradation; Belongs to the glycogen debranching enzyme family
MCL	11	Cyan	8	ASPA	Aspartoacylase; Catalyzes the deacetylation of N-acetylaspartic acid (NAA) to produce acetate and L-aspartate. NAA occurs in high concentration in brain and its hydrolysis NAA plays a significant part in the maintenance of intact white matter. In other tissues it act as a scavenger of NAA from body fluids
MCL	11	Cyan	8	ASS1	Argininosuccinate synthase; One of the enzymes of the urea cycle, the metabolic pathway transforming neurotoxic amonia produced by protein catabolism into inocuous urea in the liver of ureotelic animals. Catalyzes the formation of arginosuccinate from aspartate, citrulline and ATP and together with ASL it is responsible for the biosynthesis of arginine in most body tissues; Belongs to the arginin…
MCL	11	Cyan	8	GBE1	1,4-alpha-glucan-branching enzyme; Required for normal glycogen accumulation. The alpha 1-6 branches of glycogen play an important role in increasing the solubility of the molecule (Probable); Belongs to the glycosyl hydrolase 13 family. GlgB subfamily
MCL	11	Cyan	8	GNE	Bifunctional UDP-N-acetylglucosamine 2-epimerase/N-acetylmannosamine kinase; Regulates and initiates biosynthesis of N- acetylneuraminic acid (NeuAc), a precursor of sialic acids. Plays an essential role in early development (By similarity). Required for normal sialylation in hematopoietic cells. Sialylation is implicated in cell adhesion, signal transduction, tumorigenicity and metastatic behavi…
MCL	11	Cyan	8	OTC	Ornithine carbamoyltransferase, mitochondrial; Ornithine carbamoyltransferase; Belongs to the ATCase/OTCase family
MCL	11	Cyan	8	SLC2A2	Solute carrier family 2, facilitated glucose transporter member 2; Facilitative glucose transporter. This isoform likely mediates the bidirectional transfer of glucose across the plasma membrane of hepatocytes and is responsible for uptake of glucose by the beta cells; may comprise part of the glucose-sensing mechanism of the beta cell. May also participate with the Na(+)/glucose cotransporter in…
MCL	11	Cyan	8	SLC39A8	Solute carrier family 39 (zinc transporter), member 8; Zinc transporter ZIP8; Acts as a manganese and zinc influx transporter. Plays a role in manganese reabsorption in the proximal tubule of the kidney and in manganese uptake into the brain; Belongs to the ZIP transporter (TC 2.A.5) family
MCL	12	Sky Blue 2	8	ACADS	Short-chain specific acyl-CoA dehydrogenase, mitochondrial; Introduces a double bond at position 2 in saturated acyl-CoA's of short chain length, i.e. less than 6 carbon atoms; Belongs to the acyl-CoA dehydrogenase family
MCL	12	Sky Blue 2	8	ALDH5A1	Succinate-semialdehyde dehydrogenase, mitochondrial; Catalyzes one step in the degradation of the inhibitory neurotransmitter gamma-aminobutyric acid (GABA); Aldehyde dehydrogenases
MCL	12	Sky Blue 2	8	BCKDHA	Branched chain keto acid dehydrogenase e1, alpha polypeptide; 2-oxoisovalerate dehydrogenase subunit alpha, mitochondrial; The branched-chain alpha-keto dehydrogenase complex catalyzes the overall conversion of alpha-keto acids to acyl-CoA and CO(2). It contains multiple copies of three enzymatic components: branched-chain alpha-keto acid decarboxylase (E1), lipoamide acyltransferase (E2) and lip…
MCL	12	Sky Blue 2	8	DBT	2-oxoisovalerate dehydrogenase E2 component (dihydrolipoyl transacylase); Dihydrolipoamide branched chain transacylase E2; The branched-chain alpha-keto dehydrogenase complex catalyzes the overall conversion of alpha-keto acids to acyl-CoA and CO(2). It contains multiple copies of three enzymatic components: branched-chain alpha-keto acid decarboxylase (E1), lipoamide acyltransferase (E2) and lip…
MCL	12	Sky Blue 2	8	DHTKD1	Probable 2-oxoglutarate dehydrogenase E1 component DHKTD1, mitochondrial; The 2-oxoglutarate dehydrogenase complex catalyzes the overall conversion of 2-oxoglutarate to succinyl-CoA and CO(2). It contains multiple copies of three enzymatic components: 2- oxoglutarate dehydrogenase (E1), dihydrolipoamide succinyltransferase (E2) and lipoamide dehydrogenase (E3) (By similarity)
MCL	12	Sky Blue 2	8	FH	Fumarate hydratase, mitochondrial; Also acts as a tumor suppressor; Belongs to the class-II fumarase/aspartase family. Fumarase subfamily
MCL	12	Sky Blue 2	8	IVD	Isovaleryl-CoA dehydrogenase, mitochondrial; Acyl-CoA dehydrogenase family
MCL	12	Sky Blue 2	8	PC	Pyruvate carboxylase, mitochondrial; Pyruvate carboxylase catalyzes a 2-step reaction, involving the ATP-dependent carboxylation of the covalently attached biotin in the first step and the transfer of the carboxyl group to pyruvate in the second. Catalyzes in a tissue specific manner, the initial reactions of glucose (liver, kidney) and lipid (adipose tissue, liver, brain) synthesis from pyruvate
MCL	13	Sky Blue	8	COL18A1	Collagen alpha-1(XVIII) chain; Probably plays a major role in determining the retinal structure as well as in the closure of the neural tube; Belongs to the multiplexin collagen family
MCL	13	Sky Blue	8	COL1A1	Collagen alpha-1(I) chain; Type I collagen is a member of group I collagen (fibrillar forming collagen); Collagens
MCL	13	Sky Blue	8	COL4A2	Collagen alpha-2(IV) chain; Type IV collagen is the major structural component of glomerular basement membranes (GBM), forming a 'chicken-wire' meshwork together with laminins, proteoglycans and entactin/nidogen
MCL	13	Sky Blue	8	ITGA7	Integrin subunit alpha 7; Integrin alpha-7; Integrin alpha-7/beta-1 is the primary laminin receptor on skeletal myoblasts and adult myofibers. During myogenic differentiation, it may induce changes in the shape and mobility of myoblasts, and facilitate their localization at laminin-rich sites of secondary fiber formation. It is involved in the maintenance of the myofibers cytoarchitecture as well…
MCL	13	Sky Blue	8	LAMA1	Laminin subunit alpha-1; Binding to cells via a high affinity receptor, laminin is thought to mediate the attachment, migration and organization of cells into tissues during embryonic development by interacting with other extracellular matrix components
MCL	13	Sky Blue	8	LTBP2	Latent-transforming growth factor beta-binding protein 2; May play an integral structural role in elastic-fiber architectural organization and/or assembly; Latent transforming growth factor beta binding proteins
MCL	13	Sky Blue	8	PMP22	Peripheral myelin protein 22; Might be involved in growth regulation, and in myelinization in the peripheral nervous system; Belongs to the PMP-22/EMP/MP20 family
MCL	13	Sky Blue	8	TNR	Tenascin-R; Neural extracellular matrix (ECM) protein involved in interactions with different cells and matrix components. These interactions can influence cellular behavior by either evoking a stable adhesion and differentiation, or repulsion and inhibition of neurite growth. Binding to cell surface gangliosides inhibits RGD-dependent integrin-mediated cell adhesion and results in an inhibition …
MCL	14	Cornflower Blue 2	7	CAPN3	Calpain-3; Calcium-regulated non-lysosomal thiol-protease; Calpains
MCL	14	Cornflower Blue 2	7	FKTN	Fukutin; Glycosyltransferase involved in the biosynthesis of the phosphorylated O-mannosyl trisaccharide (N-acetylgalactosamine- beta-3-N-acetylglucosamine-beta-4-(phosphate-6-)mannose), a carbohydrate structure present in alpha-dystroglycan (DAG1), which is required for binding laminin G-like domain-containing extracellular proteins with high affinity. May interact with and reinforce a large com…
MCL	14	Cornflower Blue 2	7	MICU1	Calcium uptake protein 1, mitochondrial; Key regulator of mitochondrial calcium uniporter (MCU) that senses calcium level via its EF-hand domains. MICU1 and MICU2 form a disulfide-linked heterodimer that stimulates and inhibits MCU activity, depending on the concentration of calcium. MICU1 acts both as an activator or inhibitor of mitochondrial calcium uptake. Acts as a gatekeeper of MCU at low c…
MCL	14	Cornflower Blue 2	7	POMGNT1	Protein O-linked-mannose beta-1,2-N-acetylglucosaminyltransferase 1; Participates in O-mannosyl glycosylation. May be responsible for the synthesis of the GlcNAc(beta1-2)Man(alpha1-)O- Ser/Thr moiety on alpha-dystroglycan and other O-mannosylated proteins. Is specific for alpha linked terminal mannose and does not have MGAT3, MGAT4, MGAT5, MGAT7 or MGAT8 activity; Belongs to the glycosyltransfera…
MCL	14	Cornflower Blue 2	7	SLC13A5	Solute carrier family 13 member 5; High-affinity sodium/citrate cotransporter that mediates citrate entry into cells. The transport process is electrogenic; it is the trivalent form of citrate rather than the divalent form that is recognized as a substrate. May facilitate the utilization of circulating citrate for the generation of metabolic energy and for the synthesis of fatty acids and cholest…
MCL	14	Cornflower Blue 2	7	SLC25A1	Tricarboxylate transport protein, mitochondrial; Involved in citrate-H(+)/malate exchange. Important for the bioenergetics of hepatic cells as it provides a carbon source for fatty acid and sterol biosyntheses, and NAD(+) for the glycolytic pathway; Solute carriers
MCL	14	Cornflower Blue 2	7	SLC5A6	Sodium-dependent multivitamin transporter; Transports pantothenate, biotin and lipoate in the presence of sodium; Solute carriers
MCL	15	Blue	6	PIGK	Phosphatidylinositol glycan anchor biosynthesis class k; GPI-anchor transamidase; Mediates GPI anchoring in the endoplasmic reticulum, by replacing a protein's C-terminal GPI attachment signal peptide with a pre-assembled GPI. During this transamidation reaction, the GPI transamidase forms a carbonyl intermediate with the substrate protein; Belongs to the peptidase C13 family
MCL	15	Blue	6	PIGL	N-acetylglucosaminyl-phosphatidylinositol de-N-acetylase; Involved in the second step of GPI biosynthesis. De-N- acetylation of N-acetylglucosaminyl-phosphatidylinositol; Belongs to the PIGL family
MCL	15	Blue	6	PIGO	GPI ethanolamine phosphate transferase 3; Ethanolamine phosphate transferase involved in glycosylphosphatidylinositol-anchor biosynthesis. Transfers ethanolamine phosphate to the GPI third mannose which links the GPI-anchor to the C-terminus of the proteins by an amide bond; Belongs to the PIGG/PIGN/PIGO family. PIGO subfamily
MCL	15	Blue	6	PIGT	Phosphatidylinositol glycan anchor biosynthesis class t; GPI transamidase component PIG-T; Component of the GPI transamidase complex. Essential for transfer of GPI to proteins, particularly for formation of carbonyl intermediates; Belongs to the PIGT family
MCL	15	Blue	6	PIGW	Phosphatidylinositol-glycan biosynthesis class W protein; Required for the transport of GPI-anchored proteins to the plasma membrane. Probable acetyltransferase, which acetylates the inositol ring of phosphatidylinositol during biosynthesis of GPI-anchor. Acetylation during GPI-anchor biosynthesis is not essential for the subsequent mannosylation and is usually removed soon after the attachment o…
MCL	15	Blue	6	TCF20	Transcription factor 20; Transcriptional activator that binds to the regulatory region of MMP3 and thereby controls stromelysin expression. It stimulates the activity of various transcriptional activators such as JUN, SP1, PAX6 and ETS1, suggesting a function as a coactivator
MCL	16	Cornflower Blue	6	KYNU	Kynureninase; Catalyzes the cleavage of L-kynurenine (L-Kyn) and L-3- hydroxykynurenine (L-3OHKyn) into anthranilic acid (AA) and 3- hydroxyanthranilic acid (3-OHAA), respectively. Has a preference for the L-3-hydroxy form. Also has cysteine-conjugate-beta-lyase activity
MCL	16	Cornflower Blue	6	MMAB	Cob(I)yrinic acid a,c-diamide adenosyltransferase, mitochondrial; Adenosyltransferase involved in intracellular vitamin B12 metabolism. Generates adenosylcobalamin (AdoCbl) and directly delivers the cofactor to MUT in a transfer taht is stimulated by ATP-binding to MMAB and gated by MMAA; Cilia and flagella associated
MCL	16	Cornflower Blue	6	MTHFR	Methylenetetrahydrofolate reductase (nadph); Methylenetetrahydrofolate reductase; Catalyzes the conversion of 5,10- methylenetetrahydrofolate to 5-methyltetrahydrofolate, a co- substrate for homocysteine remethylation to methionine
MCL	16	Cornflower Blue	6	MTRR	5-methyltetrahydrofolate-homocysteine methyltransferase reductase; Methionine synthase reductase; Involved in the reductive regeneration of cob(I)alamin (vitamin B12) cofactor required for the maintenance of methionine synthase in a functional state. Necessary for utilization of methylgroups from the folate cycle, thereby affecting transgenerational epigenetic inheritance. Folate pathway donates …
MCL	16	Cornflower Blue	6	SMS	Spermine synthase; Catalyzes the production of spermine from spermidine and decarboxylated S-adenosylmethionine (dcSAM)
MCL	16	Cornflower Blue	6	UGT1A1	Udp glucuronosyltransferase family 1 member a1; UDP-glucuronosyltransferase 1-8; UDPGT is of major importance in the conjugation and subsequent elimination of potentially toxic xenobiotics and endogenous compounds. This isoform glucuronidates bilirubin IX- alpha to form both the IX-alpha-C8 and IX-alpha-C12 monoconjugates and diconjugate. Is also able to catalyze the glucuronidation of 17beta-est…
MCL	17	Purple	5	CAPZA2	Capping actin protein of muscle z-line alpha subunit 2; F-actin-capping protein subunit alpha-2; F-actin-capping proteins bind in a Ca(2+)-independent manner to the fast growing ends of actin filaments (barbed end) thereby blocking the exchange of subunits at these ends. Unlike other capping proteins (such as gelsolin and severin), these proteins do not sever actin filaments
MCL	17	Purple	5	DMXL2	DmX-like protein 2; May serve as a scaffold protein for MADD and RAB3GA on synaptic vesicles. Plays a role in the brain as a key controller of neuronal and endocrine homeostatic processes (By similarity); Deafness associated genes
MCL	17	Purple	5	POLR3A	DNA-directed RNA polymerase III subunit RPC1; DNA-dependent RNA polymerase catalyzes the transcription of DNA into RNA using the four ribonucleoside triphosphates as substrates. Largest and catalytic core component of RNA polymerase III which synthesizes small RNAs, such as 5S rRNA and tRNAs. Forms the polymerase active center together with the second largest subunit. A single-stranded DNA templa…
MCL	17	Purple	5	RAB3GAP1	Rab3 GTPase-activating protein catalytic subunit; Probable catalytic subunit of a GTPase activating protein that has specificity for Rab3 subfamily (RAB3A, RAB3B, RAB3C and RAB3D). Rab3 proteins are involved in regulated exocytosis of neurotransmitters and hormones. Specifically converts active Rab3-GTP to the inactive form Rab3-GDP. Required for normal eye and brain development. May participate …
MCL	17	Purple	5	UPB1	Beta-ureidopropionase 1; Beta-ureidopropionase; Converts N-carbamoyl-beta-aminoisobutyrate and N- carbamoyl-beta-alanine (3-ureidopropanoate) to, respectively, beta-aminoisobutyrate and beta-alanine, ammonia and carbon dioxide
MCL	18	Medium Purple	5	B4GALNT1	Beta-1,4 N-acetylgalactosaminyltransferase 1; Involved in the biosynthesis of gangliosides GM2, GD2 and GA2; Beta 4-glycosyltransferases
MCL	18	Medium Purple	5	DDHD2	Phospholipase DDHD2; Phospholipase that hydrolyzes preferentially phosphatidic acid, including 1,2-dioleoyl-sn-phosphatidic acid, and phosphatidylethanolamine. Specifically binds to phosphatidylinositol 3-phosphate (PI(3)P), phosphatidylinositol 4- phosphate (PI(4)P), phosphatidylinositol 5-phosphate (PI(5)P) and possibly phosphatidylinositol 4,5-bisphosphate (PI(4,5)P2). May be involved in the m…
MCL	18	Medium Purple	5	KIF1C	Kinesin-like protein KIF1C; Motor required for the retrograde transport of Golgi vesicles to the endoplasmic reticulum. Has a microtubule plus end- directed motility; Kinesins
MCL	18	Medium Purple	5	KIF5A	Kinesin heavy chain isoform 5A; Microtubule-dependent motor required for slow axonal transport of neurofilament proteins (NFH, NFM and NFL). Can induce formation of neurite-like membrane protrusions in non-neuronal cells in a ZFYVE27-dependent manner. The ZFYVE27-KIF5A complex contributes to the vesicular transport of VAPA, VAPB, SURF4, RAB11A, RAB11B and RTN3 proteins in neurons; Belongs to the …
MCL	18	Medium Purple	5	SEC23B	SEC23 homolog B, COPII coat complex component; Protein transport protein Sec23B; Component of the coat protein complex II (COPII) which promotes the formation of transport vesicles from the endoplasmic reticulum (ER). The coat has two main functions, the physical deformation of the endoplasmic reticulum membrane into vesicles and the selection of cargo molecules for their transport to the Golgi c…
MCL	19	Medium Purple 2	5	ALG12	Dol-P-Man:Man(7)GlcNAc(2)-PP-Dol alpha-1,6-mannosyltransferase; Adds the eighth mannose residue in an alpha-1,6 linkage onto the dolichol-PP-oligosaccharide precursor (dolichol-PP- Man(7)GlcNAc(2)) required for protein glycosylation; Belongs to the glycosyltransferase 22 family
MCL	19	Medium Purple 2	5	ALG6	Dolichyl pyrophosphate Man9GlcNAc2 alpha-1,3-glucosyltransferase; Adds the first glucose residue to the lipid-linked oligosaccharide precursor for N-linked glycosylation. Transfers glucose from dolichyl phosphate glucose (Dol-P-Glc) onto the lipid-linked oligosaccharide Man(9)GlcNAc(2)-PP-Dol; Alpha-1,3-glucosyltransferases
MCL	19	Medium Purple 2	5	ALG8	Probable dolichyl pyrophosphate Glc1Man9GlcNAc2 alpha-1,3-glucosyltransferase; Adds the second glucose residue to the lipid-linked oligosaccharide precursor for N-linked glycosylation. Transfers glucose from dolichyl phosphate glucose (Dol-P-Glc) onto the lipid-linked oligosaccharide Glc(1)Man(9)GlcNAc(2)-PP-Dol (By similarity); Alpha-1,3-glucosyltransferases
MCL	19	Medium Purple 2	5	MAN1B1	Endoplasmic reticulum mannosyl-oligosaccharide 1,2-alpha-mannosidase; Involved in glycoprotein quality control targeting of misfolded glycoproteins for degradation. It primarily trims a single alpha-1,2-linked mannose residue from Man(9)GlcNAc(2) to produce Man(8)GlcNAc(2), but at high enzyme concentrations, as found in the ER quality control compartment (ERQC), it further trims the carbohydrates…
MCL	19	Medium Purple 2	5	TUSC3	Oligosaccharyltransferase complex subunit gamma; Tumor suppressor candidate 3; Acts as accessory component of the N-oligosaccharyl transferase (OST) complex which catalyzes the transfer of a high mannose oligosaccharide from a lipid-linked oligosaccharide donor to an asparagine residue within an Asn-X-Ser/Thr consensus motif in nascent polypeptide chains. Involved in N-glycosylation of STT3B-depe…
MCL	20	Orchid 3	5	GJA5	Gap junction alpha-5 protein; One gap junction consists of a cluster of closely packed pairs of transmembrane channels, the connexons, through which materials of low MW diffuse from one cell to a neighboring cell
MCL	20	Orchid 3	5	GJB4	Gap junction beta-4 protein; One gap junction consists of a cluster of closely packed pairs of transmembrane channels, the connexons, through which materials of low MW diffuse from one cell to a neighboring cell; Belongs to the connexin family. Beta-type (group I) subfamily
MCL	20	Orchid 3	5	HCN4	Potassium/sodium hyperpolarization-activated cyclic nucleotide-gated channel 4; Hyperpolarization-activated ion channel with very slow activation and inactivation exhibiting weak selectivity for potassium over sodium ions. Contributes to the native pacemaker currents in heart (If) that regulate the rhythm of heart beat. May contribute to the native pacemaker currents in neurons (Ih). May mediate …
MCL	20	Orchid 3	5	KCND3	Potassium voltage-gated channel subfamily D member 3; Pore-forming (alpha) subunit of voltage-gated rapidly inactivating A-type potassium channels. May contribute to I(To) current in heart and I(Sa) current in neurons. Channel properties are modulated by interactions with other alpha subunits and with regulatory subunits; Belongs to the potassium channel family. D (Shal) (TC 1.A.1.2) subfamily. K…
MCL	20	Orchid 3	5	NKX2-5	Homeobox protein Nkx-2.5; Implicated in commitment to and/or differentiation of the myocardial lineage. Acts as a transcriptional activator of ANF in cooperation with GATA4 (By similarity). Binds to the core DNA motif of NPPA promoter. It is transcriptionally controlled by PBX1 and acts as a transcriptional repressor of CDKN2B (By similarity). It is required for spleen development; NKL subclass h…
MCL	21	Orchid 2	4	ABCD1	ATP-binding cassette sub-family D member 1; Probable transporter. The nucleotide-binding fold acts as an ATP-binding subunit with ATPase activity; Belongs to the ABC transporter superfamily. ABCD family. Peroxisomal fatty acyl CoA transporter (TC 3.A.1.203) subfamily
MCL	21	Orchid 2	4	HMGCL	Hydroxymethylglutaryl-CoA lyase, mitochondrial; Key enzyme in ketogenesis (ketone body formation). Terminal step in leucine catabolism. Ketone bodies (beta- hydroxybutyrate, acetoacetate and acetone) are essential as an alternative source of energy to glucose, as lipid precursors and as regulators of metabolism
MCL	21	Orchid 2	4	HSD17B4	Peroxisomal multifunctional enzyme type 2; Bifunctional enzyme acting on the peroxisomal beta- oxidation pathway for fatty acids. Catalyzes the formation of 3- ketoacyl-CoA intermediates from both straight-chain and 2-methyl- branched-chain fatty acids; Short chain dehydrogenase/reductase superfamily
MCL	21	Orchid 2	4	PEX16	Peroxisomal membrane protein PEX16; Required for peroxisome membrane biogenesis. May play a role in early stages of peroxisome assembly. Can recruit other peroxisomal proteins, such as PEX3 and PMP34, to de novo peroxisomes derived from the endoplasmic reticulum (ER). May function as receptor for PEX3; Belongs to the peroxin-16 family
MCL	22	Violet	4	ADNP	Activity-dependent neuroprotector homeobox protein; Potential transcription factor. May mediate some of the neuroprotective peptide VIP-associated effects involving normal growth and cancer proliferation; ZF class homeoboxes and pseudogenes
MCL	22	Violet	4	PHF3	PHD finger protein 3
MCL	22	Violet	4	POGZ	Pogo transposable element with ZNF domain; Plays a role in mitotic cell cycle progression and is involved in kinetochore assembly and mitotic sister chromatid cohesion. Probably through its association with CBX5 plays a role in mitotic chromosome segregation by regulating aurora kinase B/AURKB activation and AURKB and CBX5 dissociation from chromosome arms; DNA transposon derived genes
MCL	22	Violet	4	SCAF4	Splicing factor, arginine/serine-rich 15; May act to physically and functionally link transcription and pre-mRNA processing; Belongs to the splicing factor SR family
MCL	23	Violet 2	3	CSNK2A1	Casein kinase II subunit alpha; Catalytic subunit of a constitutively active serine/threonine-protein kinase complex that phosphorylates a large number of substrates containing acidic residues C-terminal to the phosphorylated serine or threonine. Regulates numerous cellular processes, such as cell cycle progression, apoptosis and transcription, as well as viral infection. May act as a regulatory …
MCL	23	Violet 2	3	PACS1	Phosphofurin acidic cluster sorting protein 1; Coat protein that is involved in the localization of trans-Golgi network (TGN) membrane proteins that contain acidic cluster sorting motifs. Controls the endosome-to-Golgi trafficking of furin and mannose-6-phosphate receptor by connecting the acidic-cluster-containing cytoplasmic domain of these molecules with the adapter-protein complex-1 (AP-1) of…
MCL	23	Violet 2	3	TRPV4	Transient receptor potential cation channel subfamily V member 4; Non-selective calcium permeant cation channel involved in osmotic sensitivity and mechanosensitivity. Activation by exposure to hypotonicity within the physiological range exhibits an outward rectification. Also activated by heat, low pH, citrate and phorbol esters. Increase of intracellular Ca(2+) potentiates currents. Channel act…
MCL	24	Orchid	3	DONSON	Dna replication fork stabilization factor donson; Protein downstream neighbor of Son; Replisome component that maintains genome stability by protecting stalled or damaged replication forks. After the induction of replication stress, required for the stabilization of stalled replication forks, the efficient activation of the intra- S-phase and G/2M cell-cycle checkpoints and the maintenance of gen…
MCL	24	Orchid	3	PUF60	Poly(U)-binding-splicing factor PUF60; DNA- and RNA-binding protein, involved in several nuclear processes such as pre-mRNA splicing, apoptosis and transcription regulation. In association with FUBP1 regulates MYC transcription at the P2 promoter through the core-TFIIH basal transcription factor. Acts as a transcriptional repressor through the core-TFIIH basal transcription factor. Represses FUBP…
MCL	24	Orchid	3	SON	Protein SON; RNA-binding protein that acts as a mRNA splicing cofactor by promoting efficient splicing of transcripts that possess weak splice sites. Specifically promotes splicing of many cell-cycle and DNA-repair transcripts that possess weak splice sites, such as TUBG1, KATNB1, TUBGCP2, AURKB, PCNT, AKT1, RAD23A, and FANCG. Probably acts by facilitating the interaction between Serine/arginine-…
MCL	25	Pink	2	B4GALT7	Xylosylprotein 4-beta-galactosyltransferase; Beta-1,4-galactosyltransferase 7; Required for the biosynthesis of the tetrasaccharide linkage region of proteoglycans, especially for small proteoglycans in skin fibroblasts; Belongs to the glycosyltransferase 7 family
MCL	25	Pink	2	EXT2	Glucuronyl/n-acetylglucosaminyl transferase ext2; Exostosin-2; Glycosyltransferase required for the biosynthesis of heparan-sulfate. The EXT1/EXT2 complex possesses substantially higher glycosyltransferase activity than EXT1 or EXT2 alone. Appears to be a tumor suppressor. Required for the exosomal release of SDCBP, CD63 and syndecan
MCL	26	Pale Violet Red	2	COG4	Conserved oligomeric Golgi complex subunit 4; Required for normal Golgi function. Plays a role in SNARE-pin assembly and Golgi-to-ER retrograde transport via its interaction with SCFD1; Belongs to the COG4 family
MCL	26	Pale Violet Red	2	COG8	Conserved oligomeric Golgi complex subunit 8; Required for normal Golgi function; Components of oligomeric golgi complex
MCL	27	Light Coral	2	ALOX12B	Arachidonate 12-lipoxygenase, 12R-type; Non-heme iron-containing dioxygenase that catalyzes the stereo-specific peroxidation of free and esterified polyunsaturated fatty acids generating a spectrum of bioactive lipid mediators. Mainly converts arachidonic acid to (12R)- hydroperoxyeicosatetraenoic acid/(12R)-HPETE and minor stereoisomers. In the skin, acts upstream of ALOXE3 on the lineolate moie…
MCL	27	Light Coral	2	SPINK5	Serine protease inhibitor Kazal-type 5; Serine protease inhibitor, probably important for the anti-inflammatory and/or antimicrobial protection of mucous epithelia. Contribute to the integrity and protective barrier function of the skin by regulating the activity of defense- activating and desquamation-involved proteases. Inhibits KLK5, it's major target, in a pH-dependent manner. Inhibits KLK7, …

## Sheet: Enrichment subnetwork1 cluster4
#category	term ID	term description	observed gene count	background gene count	strength	false discovery rate	matching proteins in your network (labels)
GO Biological Process
GO Process	GO:0045595	Regulation of cell differentiation	25	1874	0.74	8.84e-10	CDK13,SIX3,CREBBP,SETD1A,NOTCH3,SOD1,KIT,SHH,KMT2D,PPP2R1A,PTCH1,PTPN11,SMAD4,RET,SPRED2,NF1,TGFBR2,MTOR,OPA1,SOX3,ADA,ASXL1,TCF4,KMT2A,DNM1L
GO Process	GO:0050793	Regulation of developmental process	28	2648	0.64	1.67e-09	CDK13,TG,HTRA2,SIX3,CREBBP,SETD1A,NOTCH3,SOD1,KIT,SHH,KMT2D,PPP2R1A,WT1,PTCH1,PTPN11,SMAD4,RET,SPRED2,NF1,TGFBR2,MTOR,OPA1,SOX3,ADA,ASXL1,TCF4,KMT2A,DNM1L
GO Process	GO:2000026	Regulation of multicellular organismal development	24	2096	0.68	3.30e-08	TG,SIX3,CREBBP,SETD1A,NOTCH3,SOD1,KIT,SHH,KMT2D,WT1,PTCH1,PTPN11,SMAD4,RET,SPRED2,NF1,TGFBR2,MTOR,OPA1,SOX3,ADA,TCF4,KMT2A,DNM1L
GO Process	GO:0009653	Anatomical structure morphogenesis	24	2165	0.66	3.99e-08	LZTR1,MFN2,SIX3,CREBBP,NOTCH3,SOD1,SHH,ANKRD11,WT1,PTCH1,PTPN11,SMAD4,RET,SLC25A46,ACTB,NF1,TGFBR2,MTOR,OPA1,SOX3,ADA,ASXL1,CLTCL1,DNM1L
GO Process	GO:0048523	Negative regulation of cellular process	34	4874	0.46	3.99e-08	CDK13,LZTR1,MFN2,HTRA2,SIX3,CREBBP,NOTCH3,SOD1,KIT,ALB,SHH,SLC18A2,CDT1,KMT2D,LEMD3,PPP2R1A,WT1,PTCH1,PTPN11,SMAD4,SPRED2,NF1,TGFBR2,MTOR,OPA1,PSEN2,SOX3,ADA,HDAC8,ASXL1,KAT6A,KMT2A,DNM1L,CERS1
GO Process	GO:0051239	Regulation of multicellular organismal process	28	3227	0.56	7.33e-08	TG,MFN2,HTRA2,SIX3,CREBBP,SETD1A,NOTCH3,SOD1,KIT,SHH,KMT2D,PPP2R1A,WT1,PTCH1,PTPN11,SMAD4,RET,SPRED2,NF1,TGFBR2,MTOR,OPA1,SOX3,ADA,TCF4,KMT2A,DNM1L,ALMS1
GO Process	GO:0048732	Gland development	12	410	2023-09-01	4.09e-07	TG,SIX3,SOD1,SHH,WT1,PTCH1,SMAD4,NF1,TGFBR2,SOX3,ADA,ASXL1
GO Process	GO:0048856	Anatomical structure development	34	5402	0.42	4.09e-07	CDK13,LZTR1,TG,MFN2,HTRA2,SIX3,CREBBP,NOTCH3,SOD1,KIT,SHH,SLC18A2,ANKRD11,KMT2D,WT1,PTCH1,PTPN11,SMAD4,RET,SLC25A46,SPRED2,ACTB,NF1,TGFBR2,MTOR,OPA1,SOX3,ADA,ASXL1,KAT6A,TCF4,KMT2A,CLTCL1,DNM1L
GO Process	GO:0009966	Regulation of signal transduction	26	3107	0.54	8.92e-07	LZTR1,MFN2,HTRA2,SIX3,CREBBP,NOTCH3,SOD1,KIT,SHH,KMT2D,LEMD3,PPP2R1A,PTCH1,PTPN11,SMAD4,RET,SPRED2,NF1,TGFBR2,MTOR,OPA1,ADA,ASXL1,KAT6A,DNM1L,CERS1
GO Process	GO:0010648	Negative regulation of cell communication	18	1382	0.73	1.51e-06	LZTR1,MFN2,HTRA2,SIX3,NOTCH3,SHH,LEMD3,PPP2R1A,PTCH1,PTPN11,SMAD4,SPRED2,NF1,TGFBR2,MTOR,OPA1,ADA,ASXL1
GO Process	GO:0023057	Negative regulation of signaling	18	1385	0.73	1.51e-06	LZTR1,MFN2,HTRA2,SIX3,NOTCH3,SHH,LEMD3,PPP2R1A,PTCH1,PTPN11,SMAD4,SPRED2,NF1,TGFBR2,MTOR,OPA1,ADA,ASXL1
GO Process	GO:0048513	Animal organ development	26	3197	0.53	1.51e-06	CDK13,TG,MFN2,HTRA2,SIX3,NOTCH3,SOD1,KIT,SHH,ANKRD11,WT1,PTCH1,PTPN11,SMAD4,RET,SLC25A46,ACTB,NF1,TGFBR2,MTOR,OPA1,SOX3,ADA,ASXL1,KAT6A,KMT2A
GO Process	GO:0048518	Positive regulation of biological process	35	6112	0.38	1.51e-06	CDK13,MFN2,HTRA2,SIX3,CREBBP,NOTCH3,SOD1,KIT,SHH,CDT1,KMT2D,DUOXA2,PPP2R1A,WT1,PTCH1,PTPN11,SMAD4,RET,SPRED2,ACTB,NF1,TGFBR2,MTOR,OPA1,PSEN2,ADA,HDAC8,ASXL1,KAT6A,TCF4,KMT2A,CLTCL1,DNM1L,ALMS1,CERS1
GO Process	GO:0048583	Regulation of response to stimulus	29	4114	0.47	1.61e-06	LZTR1,MFN2,HTRA2,SIX3,CREBBP,NOTCH3,SOD1,KIT,SHH,KMT2D,LEMD3,DUOXA2,PPP2R1A,PTCH1,PTPN11,SMAD4,RET,SPRED2,ACTB,NF1,TGFBR2,MTOR,OPA1,ADA,ASXL1,KAT6A,KMT2A,DNM1L,CERS1
GO Process	GO:0016043	Cellular component organization	33	5447	0.4	1.68e-06	MFN2,HTRA2,CREBBP,SETD1A,NOTCH3,SOD1,KIT,ALB,SHH,CDT1,KMT2D,LEMD3,PPP2R1A,WT1,PTCH1,PTPN11,SMAD4,RET,SLC25A46,ACTB,NF1,MTOR,OPA1,PSEN2,DNAJC6,HDAC8,ASXL1,KAT6A,TCF4,KMT2A,CLTCL1,DNM1L,ALMS1
GO Process	GO:0009968	Negative regulation of signal transduction	17	1271	0.75	2.10e-06	LZTR1,MFN2,HTRA2,SIX3,NOTCH3,SHH,LEMD3,PPP2R1A,PTCH1,SMAD4,SPRED2,NF1,TGFBR2,MTOR,OPA1,ADA,ASXL1
GO Process	GO:0048522	Positive regulation of cellular process	33	5579	0.39	2.74e-06	CDK13,MFN2,HTRA2,SIX3,CREBBP,NOTCH3,SOD1,KIT,SHH,CDT1,KMT2D,DUOXA2,PPP2R1A,WT1,PTCH1,PTPN11,SMAD4,RET,SPRED2,NF1,TGFBR2,MTOR,OPA1,PSEN2,ADA,HDAC8,ASXL1,KAT6A,TCF4,KMT2A,CLTCL1,DNM1L,CERS1
GO Process	GO:1901564	Organonitrogen compound metabolic process	32	5244	0.4	2.83e-06	CDK13,LZTR1,TG,IYD,HTRA2,CREBBP,SETD1A,DPH1,SOD1,KIT,ALB,SHH,KMT2D,DUOXA2,PPP2R1A,PTCH1,PTPN11,SMAD4,RET,ACTB,NF1,TGFBR2,MTOR,OPA1,PSEN2,DNAJC6,ADA,HDAC8,ASXL1,KAT6A,KMT2A,CERS1
GO Process	GO:0065007	Biological regulation	46	12171	0.2	3.63e-06	CDK13,LZTR1,TG,IYD,MFN2,HTRA2,SIX3,CREBBP,SETD1A,DPH1,NOTCH3,SOD1,KIT,ALB,SHH,SLC18A2,CDT1,ANKRD11,KMT2D,LEMD3,DUOXA2,PPP2R1A,WT1,PTCH1,PTPN11,SMAD4,RET,SPRED2,ACTB,NF1,TGFBR2,MTOR,OPA1,PSEN2,SOX3,DNAJC6,ADA,HDAC8,ASXL1,KAT6A,TCF4,KMT2A,CLTCL1,DNM1L,ALMS1,CERS1
GO Process	GO:0007275	Multicellular organism development	31	5023	0.41	4.12e-06	CDK13,TG,MFN2,HTRA2,SIX3,CREBBP,NOTCH3,SOD1,KIT,SHH,SLC18A2,ANKRD11,WT1,PTCH1,PTPN11,SMAD4,RET,SLC25A46,SPRED2,ACTB,NF1,TGFBR2,MTOR,OPA1,SOX3,ADA,ASXL1,KAT6A,TCF4,KMT2A,DNM1L
GO Process	GO:0007423	Sensory organ development	12	563	0.95	4.12e-06	MFN2,SIX3,SOD1,KIT,SHH,WT1,PTPN11,RET,NF1,TGFBR2,OPA1,SOX3
GO Process	GO:0009790	Embryo development	15	1002	0.79	4.12e-06	MFN2,SIX3,CREBBP,SOD1,KIT,SHH,ANKRD11,WT1,PTCH1,SMAD4,RET,NF1,TGFBR2,ADA,KMT2A
GO Process	GO:0048699	Generation of neurons	18	1551	0.68	4.12e-06	HTRA2,SIX3,NOTCH3,SOD1,KIT,SHH,PTCH1,PTPN11,SMAD4,RET,SLC25A46,ACTB,NF1,MTOR,OPA1,SOX3,TCF4,DNM1L
GO Process	GO:0050794	Regulation of cellular process	44	10932	0.22	5.42e-06	CDK13,LZTR1,TG,MFN2,HTRA2,SIX3,CREBBP,SETD1A,DPH1,NOTCH3,SOD1,KIT,ALB,SHH,SLC18A2,CDT1,KMT2D,LEMD3,DUOXA2,PPP2R1A,WT1,PTCH1,PTPN11,SMAD4,RET,SPRED2,ACTB,NF1,TGFBR2,MTOR,OPA1,PSEN2,SOX3,DNAJC6,ADA,HDAC8,ASXL1,KAT6A,TCF4,KMT2A,CLTCL1,DNM1L,ALMS1,CERS1
GO Process	GO:0031323	Regulation of cellular metabolic process	34	6239	0.36	6.84e-06	CDK13,LZTR1,MFN2,HTRA2,SIX3,CREBBP,DPH1,NOTCH3,SOD1,KIT,SHH,SLC18A2,CDT1,KMT2D,DUOXA2,PPP2R1A,WT1,PTCH1,PTPN11,SMAD4,RET,SPRED2,ACTB,NF1,TGFBR2,MTOR,SOX3,HDAC8,ASXL1,KAT6A,TCF4,KMT2A,DNM1L,CERS1
GO Process	GO:0009893	Positive regulation of metabolic process	27	3893	0.46	7.00e-06	CDK13,MFN2,HTRA2,SIX3,CREBBP,NOTCH3,SOD1,KIT,SHH,CDT1,KMT2D,DUOXA2,WT1,PTCH1,PTPN11,SMAD4,RET,ACTB,TGFBR2,MTOR,HDAC8,ASXL1,KAT6A,TCF4,KMT2A,ALMS1,CERS1
GO Process	GO:0048468	Cell development	18	1629	0.66	7.00e-06	HTRA2,SIX3,NOTCH3,SOD1,KIT,SHH,KMT2D,WT1,PTCH1,PTPN11,SMAD4,RET,SLC25A46,ACTB,NF1,TGFBR2,MTOR,ASXL1
GO Process	GO:0048585	Negative regulation of response to stimulus	18	1636	0.66	7.02e-06	LZTR1,MFN2,HTRA2,SIX3,NOTCH3,SOD1,SHH,LEMD3,PPP2R1A,PTCH1,SMAD4,SPRED2,NF1,TGFBR2,MTOR,OPA1,ADA,ASXL1
GO Process	GO:0048534	Hematopoietic or lymphoid organ development	12	619	0.91	7.81e-06	CDK13,SOD1,KIT,SHH,PTPN11,RET,TGFBR2,MTOR,ADA,ASXL1,KAT6A,KMT2A
GO Process	GO:0009967	Positive regulation of signal transduction	18	1654	0.66	7.84e-06	HTRA2,CREBBP,SOD1,KIT,SHH,KMT2D,PPP2R1A,PTPN11,SMAD4,RET,SPRED2,NF1,MTOR,OPA1,ADA,ASXL1,DNM1L,CERS1
GO Process	GO:0065009	Regulation of molecular function	30	4913	0.41	8.83e-06	LZTR1,TG,HTRA2,SIX3,CREBBP,SOD1,KIT,SHH,CDT1,KMT2D,PPP2R1A,WT1,PTCH1,PTPN11,SMAD4,RET,SPRED2,ACTB,NF1,TGFBR2,MTOR,PSEN2,SOX3,HDAC8,ASXL1,KAT6A,TCF4,KMT2A,DNM1L,CERS1
GO Process	GO:0031325	Positive regulation of cellular metabolic process	25	3413	0.48	1.04e-05	CDK13,MFN2,HTRA2,SIX3,CREBBP,NOTCH3,SOD1,KIT,SHH,CDT1,KMT2D,DUOXA2,WT1,PTCH1,PTPN11,SMAD4,RET,TGFBR2,MTOR,HDAC8,ASXL1,KAT6A,TCF4,KMT2A,CERS1
GO Process	GO:0060322	Head development	13	788	0.84	1.04e-05	HTRA2,SIX3,NOTCH3,SHH,ANKRD11,PTCH1,PTPN11,SLC25A46,ACTB,NF1,TGFBR2,MTOR,SOX3
GO Process	GO:2001241	Positive regulation of extrinsic apoptotic signaling pathway in absence of ligand	4	11	2.18	1.21e-05	HTRA2,PPP2R1A,RET,NF1
GO Process	GO:0009628	Response to abiotic stimulus	15	1147	0.74	1.36e-05	HTRA2,CREBBP,SOD1,KIT,PTCH1,PTPN11,SMAD4,NF1,TGFBR2,MTOR,OPA1,PSEN2,ADA,DNM1L,CERS1
GO Process	GO:0051093	Negative regulation of developmental process	14	983	0.77	1.49e-05	CDK13,SIX3,NOTCH3,SHH,WT1,PTCH1,PTPN11,SMAD4,SPRED2,NF1,TGFBR2,SOX3,ASXL1,DNM1L
GO Process	GO:0048731	System development	28	4426	0.42	1.70e-05	CDK13,TG,MFN2,HTRA2,SIX3,NOTCH3,SOD1,KIT,SHH,ANKRD11,WT1,PTCH1,PTPN11,SMAD4,RET,SLC25A46,ACTB,NF1,TGFBR2,MTOR,OPA1,SOX3,ADA,ASXL1,KAT6A,TCF4,KMT2A,DNM1L
GO Process	GO:0019222	Regulation of metabolic process	35	6948	0.32	1.79e-05	CDK13,LZTR1,MFN2,HTRA2,SIX3,CREBBP,DPH1,NOTCH3,SOD1,KIT,SHH,SLC18A2,CDT1,KMT2D,DUOXA2,PPP2R1A,WT1,PTCH1,PTPN11,SMAD4,RET,SPRED2,ACTB,NF1,TGFBR2,MTOR,SOX3,HDAC8,ASXL1,KAT6A,TCF4,KMT2A,DNM1L,ALMS1,CERS1
GO Process	GO:0001656	Metanephros development	6	84	1.47	2.01e-05	SHH,WT1,PTCH1,SMAD4,RET,NF1
GO Process	GO:0032879	Regulation of localization	22	2740	0.52	2.01e-05	HTRA2,SOD1,KIT,SHH,CDT1,DUOXA2,PTCH1,PTPN11,SMAD4,RET,ACTB,NF1,TGFBR2,MTOR,PSEN2,DNAJC6,ADA,HDAC8,ASXL1,KMT2A,CLTCL1,DNM1L
GO Process	GO:0051171	Regulation of nitrogen compound metabolic process	32	5836	0.36	2.01e-05	CDK13,LZTR1,HTRA2,SIX3,CREBBP,DPH1,NOTCH3,SOD1,KIT,SHH,CDT1,KMT2D,DUOXA2,PPP2R1A,WT1,PTCH1,PTPN11,SMAD4,RET,SPRED2,ACTB,NF1,TGFBR2,MTOR,SOX3,HDAC8,ASXL1,KAT6A,TCF4,KMT2A,DNM1L,CERS1
GO Process	GO:0048584	Positive regulation of response to stimulus	20	2257	0.57	2.06e-05	HTRA2,CREBBP,SOD1,KIT,SHH,KMT2D,PPP2R1A,PTPN11,SMAD4,RET,SPRED2,ACTB,NF1,MTOR,OPA1,ADA,ASXL1,KMT2A,DNM1L,CERS1
GO Process	GO:0044237	Cellular metabolic process	36	7513	0.3	2.81e-05	CDK13,LZTR1,TG,IYD,MFN2,HTRA2,CREBBP,SETD1A,DPH1,NOTCH3,SOD1,KIT,ALB,SHH,CDT1,KMT2D,DUOXA2,PPP2R1A,WT1,PTPN11,SMAD4,RET,SLC25A46,ACTB,NF1,TGFBR2,MTOR,OPA1,PSEN2,DNAJC6,ADA,HDAC8,ASXL1,KAT6A,KMT2A,CERS1
GO Process	GO:0001666	Response to hypoxia	9	342	2023-04-01	3.03e-05	CREBBP,SMAD4,NF1,TGFBR2,MTOR,OPA1,PSEN2,ADA,DNM1L
GO Process	GO:0010628	Positive regulation of gene expression	20	2337	0.55	3.27e-05	CDK13,SIX3,CREBBP,NOTCH3,SOD1,KIT,SHH,KMT2D,WT1,PTCH1,PTPN11,SMAD4,RET,ACTB,MTOR,HDAC8,ASXL1,KAT6A,TCF4,KMT2A
GO Process	GO:0007420	Brain development	12	745	0.83	3.46e-05	HTRA2,SIX3,NOTCH3,SHH,PTCH1,PTPN11,SLC25A46,ACTB,NF1,TGFBR2,MTOR,SOX3
GO Process	GO:0042221	Response to chemical	27	4333	0.41	3.97e-05	IYD,MFN2,HTRA2,CREBBP,NOTCH3,SOD1,KIT,ALB,SHH,SLC18A2,CDT1,KMT2D,PPP2R1A,WT1,PTCH1,PTPN11,SMAD4,RET,SPRED2,ACTB,TGFBR2,MTOR,OPA1,ADA,ASXL1,DNM1L,CERS1
GO Process	GO:0010941	Regulation of cell death	17	1696	0.62	4.35e-05	MFN2,HTRA2,CREBBP,SOD1,KIT,ALB,SHH,PPP2R1A,WT1,SMAD4,RET,NF1,MTOR,OPA1,PSEN2,ADA,DNM1L
GO Process	GO:0006807	Nitrogen compound metabolic process	34	6852	0.32	4.59e-05	CDK13,LZTR1,TG,IYD,HTRA2,CREBBP,SETD1A,DPH1,NOTCH3,SOD1,KIT,ALB,SHH,KMT2D,DUOXA2,PPP2R1A,WT1,PTCH1,PTPN11,SMAD4,RET,ACTB,NF1,TGFBR2,MTOR,OPA1,PSEN2,DNAJC6,ADA,HDAC8,ASXL1,KAT6A,KMT2A,CERS1
GO Process	GO:1903706	Regulation of hemopoiesis	10	493	0.93	5.24e-05	CREBBP,SETD1A,SOD1,SHH,KMT2D,NF1,TGFBR2,MTOR,ADA,KMT2A
GO Process	GO:0060284	Regulation of cell development	13	956	0.75	5.87e-05	SIX3,NOTCH3,KIT,SHH,PPP2R1A,SMAD4,RET,NF1,MTOR,OPA1,SOX3,TCF4,DNM1L
GO Process	GO:0001822	Kidney development	8	271	2023-09-01	6.02e-05	NOTCH3,SHH,WT1,PTCH1,SMAD4,RET,NF1,ASXL1
GO Process	GO:0032501	Multicellular organismal process	34	6933	0.31	6.02e-05	CDK13,TG,MFN2,HTRA2,SIX3,CREBBP,NOTCH3,SOD1,KIT,ALB,SHH,SLC18A2,ANKRD11,KMT2D,PPP2R1A,WT1,PTCH1,PTPN11,SMAD4,RET,SLC25A46,SPRED2,ACTB,NF1,TGFBR2,MTOR,OPA1,SOX3,ADA,ASXL1,KAT6A,TCF4,KMT2A,DNM1L
GO Process	GO:0010468	Regulation of gene expression	28	4813	0.38	7.31e-05	CDK13,LZTR1,SIX3,CREBBP,DPH1,NOTCH3,SOD1,KIT,SHH,CDT1,KMT2D,PPP2R1A,WT1,PTCH1,PTPN11,SMAD4,RET,ACTB,NF1,TGFBR2,MTOR,SOX3,HDAC8,ASXL1,KAT6A,TCF4,KMT2A,DNM1L
GO Process	GO:0010033	Response to organic substance	22	3011	0.48	7.34e-05	MFN2,HTRA2,SOD1,KIT,SLC18A2,CDT1,KMT2D,PPP2R1A,WT1,PTCH1,PTPN11,SMAD4,RET,SPRED2,ACTB,TGFBR2,MTOR,OPA1,ADA,ASXL1,DNM1L,CERS1
GO Process	GO:0031328	Positive regulation of cellular biosynthetic process	18	2005	0.57	7.34e-05	CDK13,SIX3,CREBBP,NOTCH3,SHH,CDT1,KMT2D,DUOXA2,WT1,PTCH1,SMAD4,RET,MTOR,HDAC8,ASXL1,KAT6A,TCF4,KMT2A
GO Process	GO:0043067	Regulation of programmed cell death	16	1569	0.63	7.58e-05	MFN2,HTRA2,CREBBP,SOD1,KIT,ALB,SHH,PPP2R1A,WT1,RET,NF1,MTOR,OPA1,PSEN2,ADA,DNM1L
GO Process	GO:0008152	Metabolic process	37	8298	0.27	7.87e-05	CDK13,LZTR1,TG,IYD,MFN2,HTRA2,CREBBP,SETD1A,DPH1,NOTCH3,SOD1,KIT,ALB,SHH,CDT1,KMT2D,DUOXA2,PPP2R1A,WT1,PTCH1,PTPN11,SMAD4,RET,SLC25A46,ACTB,NF1,TGFBR2,MTOR,OPA1,PSEN2,DNAJC6,ADA,HDAC8,ASXL1,KAT6A,KMT2A,CERS1
GO Process	GO:0010604	Positive regulation of macromolecule metabolic process	24	3600	0.44	7.87e-05	CDK13,HTRA2,SIX3,CREBBP,NOTCH3,SOD1,KIT,SHH,CDT1,KMT2D,WT1,PTCH1,PTPN11,SMAD4,RET,ACTB,TGFBR2,MTOR,HDAC8,ASXL1,KAT6A,TCF4,KMT2A,CERS1
GO Process	GO:0032990	Cell part morphogenesis	10	525	0.9	7.87e-05	NOTCH3,SHH,PTCH1,PTPN11,SMAD4,RET,SLC25A46,ACTB,OPA1,DNM1L
GO Process	GO:0009889	Regulation of biosynthetic process	26	4210	0.41	7.95e-05	CDK13,LZTR1,SIX3,CREBBP,DPH1,NOTCH3,SOD1,KIT,SHH,SLC18A2,CDT1,KMT2D,DUOXA2,PPP2R1A,WT1,PTCH1,SMAD4,RET,MTOR,SOX3,HDAC8,ASXL1,KAT6A,TCF4,KMT2A,CERS1
GO Process	GO:0045893	Positive regulation of transcription, dna-templated	16	1587	0.62	8.24e-05	CDK13,SIX3,CREBBP,NOTCH3,SHH,KMT2D,WT1,PTCH1,SMAD4,RET,MTOR,HDAC8,ASXL1,KAT6A,TCF4,KMT2A
GO Process	GO:1902531	Regulation of intracellular signal transduction	17	1807	0.59	8.29e-05	LZTR1,MFN2,HTRA2,SOD1,KIT,LEMD3,PPP2R1A,PTPN11,SMAD4,RET,SPRED2,NF1,MTOR,OPA1,ADA,KAT6A,DNM1L
GO Process	GO:0035270	Endocrine system development	6	120	1.32	8.89e-05	TG,SIX3,SHH,WT1,NF1,SOX3
GO Process	GO:0019538	Protein metabolic process	26	4251	0.41	9.08e-05	CDK13,LZTR1,HTRA2,CREBBP,SETD1A,DPH1,KIT,ALB,SHH,KMT2D,DUOXA2,PPP2R1A,PTCH1,PTPN11,SMAD4,RET,ACTB,NF1,TGFBR2,MTOR,PSEN2,DNAJC6,HDAC8,ASXL1,KAT6A,KMT2A
GO Process	GO:1903429	Regulation of cell maturation	4	24	1.84	9.12e-05	PPP2R1A,RET,MTOR,OPA1
GO Process	GO:0014042	Positive regulation of neuron maturation	3	5	2023-04-02	0.00011	RET,MTOR,OPA1
GO Process	GO:0072006	Nephron development	6	126	2023-03-01	0.00011	NOTCH3,SHH,WT1,PTCH1,SMAD4,ASXL1
GO Process	GO:0030154	Cell differentiation	24	3702	0.43	0.00012	HTRA2,SIX3,NOTCH3,SOD1,KIT,SHH,KMT2D,WT1,PTCH1,PTPN11,SMAD4,RET,SLC25A46,ACTB,NF1,TGFBR2,MTOR,OPA1,SOX3,ADA,ASXL1,KAT6A,TCF4,DNM1L
GO Process	GO:0051241	Negative regulation of multicellular organismal process	14	1231	0.68	0.00012	SIX3,NOTCH3,SOD1,SHH,WT1,PTCH1,PTPN11,SMAD4,SPRED2,NF1,TGFBR2,MTOR,SOX3,ADA
GO Process	GO:0080090	Regulation of primary metabolic process	31	6032	0.33	0.00012	CDK13,LZTR1,HTRA2,SIX3,CREBBP,DPH1,NOTCH3,SOD1,KIT,SHH,CDT1,KMT2D,PPP2R1A,WT1,PTCH1,PTPN11,SMAD4,RET,SPRED2,ACTB,NF1,TGFBR2,MTOR,SOX3,HDAC8,ASXL1,KAT6A,TCF4,KMT2A,DNM1L,CERS1
GO Process	GO:0007399	Nervous system development	19	2371	0.52	0.00013	HTRA2,SIX3,NOTCH3,SOD1,KIT,SHH,PTCH1,PTPN11,SMAD4,RET,SLC25A46,ACTB,NF1,TGFBR2,MTOR,OPA1,SOX3,TCF4,DNM1L
GO Process	GO:0030097	Hemopoiesis	10	570	0.86	0.00013	CDK13,KIT,SHH,PTPN11,TGFBR2,MTOR,ADA,ASXL1,KAT6A,KMT2A
GO Process	GO:0072073	Kidney epithelium development	6	130	1.28	0.00013	SHH,WT1,PTCH1,SMAD4,RET,ASXL1
GO Process	GO:0010557	Positive regulation of macromolecule biosynthetic process	17	1906	0.57	0.00014	CDK13,SIX3,CREBBP,NOTCH3,SHH,CDT1,KMT2D,WT1,PTCH1,SMAD4,RET,MTOR,HDAC8,ASXL1,KAT6A,TCF4,KMT2A
GO Process	GO:0043010	Camera-type eye development	8	318	2023-02-01	0.00014	MFN2,SIX3,SHH,WT1,RET,NF1,TGFBR2,OPA1
GO Process	GO:0044648	Histone h3-k4 dimethylation	3	6	2.32	0.00014	SETD1A,KMT2D,KMT2A
GO Process	GO:0045596	Negative regulation of cell differentiation	11	728	0.8	0.00014	CDK13,SIX3,NOTCH3,SHH,PTCH1,PTPN11,SMAD4,SPRED2,NF1,SOX3,ASXL1
GO Process	GO:0048667	Cell morphogenesis involved in neuron differentiation	9	445	0.93	0.00015	NOTCH3,SOD1,SHH,PTCH1,PTPN11,SMAD4,RET,SLC25A46,ACTB
GO Process	GO:0051173	Positive regulation of nitrogen compound metabolic process	22	3239	0.45	0.00018	CDK13,HTRA2,SIX3,CREBBP,NOTCH3,SOD1,KIT,SHH,KMT2D,WT1,PTCH1,PTPN11,SMAD4,RET,TGFBR2,MTOR,HDAC8,ASXL1,KAT6A,TCF4,KMT2A,CERS1
GO Process	GO:0051640	Organelle localization	10	598	0.84	0.00018	MFN2,KIT,ALB,CDT1,PPP2R1A,MTOR,OPA1,PSEN2,DNM1L,ALMS1
GO Process	GO:0051641	Cellular localization	21	2967	0.47	0.00018	CDK13,MFN2,SIX3,SOD1,KIT,ALB,SHH,SLC18A2,CDT1,DUOXA2,PPP2R1A,PTCH1,ACTB,NF1,MTOR,OPA1,PSEN2,DNAJC6,CLTCL1,DNM1L,ALMS1
GO Process	GO:0071704	Organic substance metabolic process	35	7755	0.27	0.00018	CDK13,LZTR1,TG,IYD,HTRA2,CREBBP,SETD1A,DPH1,NOTCH3,SOD1,KIT,ALB,SHH,CDT1,KMT2D,DUOXA2,PPP2R1A,WT1,PTCH1,PTPN11,SMAD4,RET,ACTB,NF1,TGFBR2,MTOR,OPA1,PSEN2,DNAJC6,ADA,HDAC8,ASXL1,KAT6A,KMT2A,CERS1
GO Process	GO:0120036	Plasma membrane bounded cell projection organization	13	1122	0.68	0.00021	NOTCH3,SOD1,KIT,SHH,PPP2R1A,PTCH1,PTPN11,SMAD4,RET,SLC25A46,ACTB,MTOR,ALMS1
GO Process	GO:0051960	Regulation of nervous system development	12	942	0.72	0.00022	TG,SIX3,NOTCH3,KIT,SHH,RET,NF1,MTOR,OPA1,SOX3,TCF4,DNM1L
GO Process	GO:0042981	Regulation of apoptotic process	15	1550	0.61	0.00025	MFN2,HTRA2,CREBBP,SOD1,ALB,SHH,PPP2R1A,WT1,RET,NF1,MTOR,OPA1,PSEN2,ADA,DNM1L
GO Process	GO:0051240	Positive regulation of multicellular organismal process	16	1770	0.58	0.00025	MFN2,CREBBP,SOD1,KIT,SHH,WT1,PTPN11,SMAD4,RET,TGFBR2,MTOR,OPA1,ADA,TCF4,DNM1L,ALMS1
GO Process	GO:0090092	Regulation of transmembrane receptor protein serine/threonine kinase signaling pathway	7	244	2023-08-01	0.00025	CREBBP,SHH,LEMD3,SMAD4,SPRED2,TGFBR2,CERS1
GO Process	GO:0097692	Histone h3-k4 monomethylation	3	8	2.19	0.00025	SETD1A,KMT2D,KMT2A
GO Process	GO:0060993	Kidney morphogenesis	5	84	1.39	0.00026	SHH,WT1,PTCH1,SMAD4,ASXL1
GO Process	GO:0009887	Animal organ morphogenesis	12	967	0.71	0.00027	MFN2,SIX3,SOD1,SHH,ANKRD11,WT1,PTCH1,SMAD4,NF1,TGFBR2,MTOR,ASXL1
GO Process	GO:0006464	Cellular protein modification process	21	3063	0.46	0.00028	CDK13,LZTR1,CREBBP,SETD1A,DPH1,KIT,ALB,KMT2D,PPP2R1A,PTPN11,SMAD4,RET,ACTB,NF1,TGFBR2,MTOR,DNAJC6,HDAC8,ASXL1,KAT6A,KMT2A
GO Process	GO:0001657	Ureteric bud development	5	86	1.38	0.00029	SHH,WT1,PTCH1,SMAD4,RET
GO Process	GO:0009798	Axis specification	5	88	1.37	0.00030	SIX3,SHH,WT1,PTCH1,SMAD4
GO Process	GO:0044267	Cellular protein metabolic process	23	3696	0.41	0.00033	CDK13,LZTR1,HTRA2,CREBBP,SETD1A,DPH1,KIT,ALB,KMT2D,PPP2R1A,PTPN11,SMAD4,RET,ACTB,NF1,TGFBR2,MTOR,PSEN2,DNAJC6,HDAC8,ASXL1,KAT6A,KMT2A
GO Process	GO:1902532	Negative regulation of intracellular signal transduction	9	508	0.87	0.00033	LZTR1,MFN2,HTRA2,PPP2R1A,SMAD4,SPRED2,NF1,MTOR,OPA1
GO Process	GO:0060255	Regulation of macromolecule metabolic process	31	6407	0.3	0.00034	CDK13,LZTR1,HTRA2,SIX3,CREBBP,DPH1,NOTCH3,SOD1,KIT,SHH,CDT1,KMT2D,PPP2R1A,WT1,PTCH1,PTPN11,SMAD4,RET,SPRED2,ACTB,NF1,TGFBR2,MTOR,SOX3,HDAC8,ASXL1,KAT6A,TCF4,KMT2A,DNM1L,CERS1
GO Process	GO:0050767	Regulation of neurogenesis	11	828	0.74	0.00035	SIX3,NOTCH3,KIT,SHH,RET,NF1,MTOR,OPA1,SOX3,TCF4,DNM1L
GO Process	GO:0007409	Axonogenesis	8	384	0.94	0.00037	NOTCH3,SHH,PTCH1,PTPN11,SMAD4,RET,SLC25A46,ACTB
GO Process	GO:0065008	Regulation of biological quality	24	4042	0.39	0.00038	TG,IYD,MFN2,CREBBP,SOD1,KIT,ALB,SHH,SLC18A2,ANKRD11,DUOXA2,PTCH1,PTPN11,SMAD4,RET,ACTB,NF1,MTOR,OPA1,ADA,HDAC8,ASXL1,DNM1L,ALMS1
GO Process	GO:0007507	Heart development	9	522	0.86	0.00039	SHH,WT1,PTCH1,PTPN11,SMAD4,NF1,TGFBR2,MTOR,ASXL1
GO Process	GO:0006996	Organelle organization	22	3450	0.42	0.00040	MFN2,HTRA2,CREBBP,SETD1A,SOD1,KIT,SHH,CDT1,KMT2D,LEMD3,PPP2R1A,SLC25A46,ACTB,NF1,MTOR,OPA1,HDAC8,ASXL1,KAT6A,KMT2A,DNM1L,ALMS1
GO Process	GO:0007568	Aging	7	274	2023-03-01	0.00042	HTRA2,SOD1,TGFBR2,MTOR,OPA1,ADA,KAT6A
GO Process	GO:0031324	Negative regulation of cellular metabolic process	19	2630	0.48	0.00042	HTRA2,SIX3,CREBBP,NOTCH3,SHH,SLC18A2,KMT2D,PPP2R1A,WT1,PTCH1,SMAD4,SPRED2,NF1,MTOR,SOX3,HDAC8,KAT6A,KMT2A,CERS1
GO Process	GO:0035295	Tube development	11	851	0.73	0.00043	NOTCH3,KIT,SHH,WT1,PTCH1,SMAD4,RET,NF1,TGFBR2,ADA,ASXL1
GO Process	GO:0051338	Regulation of transferase activity	12	1036	0.68	0.00044	SOD1,KIT,PPP2R1A,PTPN11,RET,SPRED2,ACTB,NF1,TGFBR2,MTOR,DNM1L,CERS1
GO Process	GO:0072009	Nephron epithelium development	5	98	1.33	0.00044	SHH,WT1,PTCH1,SMAD4,ASXL1
GO Process	GO:0001658	Branching involved in ureteric bud morphogenesis	4	44	1.58	0.00048	SHH,WT1,PTCH1,SMAD4
GO Process	GO:2001235	Positive regulation of apoptotic signaling pathway	6	180	1.14	0.00048	HTRA2,SOD1,PPP2R1A,RET,NF1,DNM1L
GO Process	GO:0051128	Regulation of cellular component organization	18	2402	0.49	0.00049	CDK13,MFN2,HTRA2,SETD1A,KIT,CDT1,PPP2R1A,WT1,PTPN11,SMAD4,RET,MTOR,OPA1,DNAJC6,HDAC8,KMT2A,DNM1L,ALMS1
GO Process	GO:0012501	Programmed cell death	12	1054	0.68	0.00050	MFN2,HTRA2,SIX3,KIT,SHH,PPP2R1A,NF1,TGFBR2,MTOR,OPA1,KMT2A,DNM1L
GO Process	GO:0031326	Regulation of cellular biosynthetic process	24	4125	0.38	0.00051	CDK13,LZTR1,SIX3,CREBBP,DPH1,NOTCH3,KIT,SHH,CDT1,KMT2D,DUOXA2,PPP2R1A,WT1,PTCH1,SMAD4,RET,MTOR,SOX3,HDAC8,ASXL1,KAT6A,TCF4,KMT2A,CERS1
GO Process	GO:0045944	Positive regulation of transcription by rna polymerase ii	13	1253	0.64	0.00051	CDK13,SIX3,CREBBP,NOTCH3,SHH,KMT2D,WT1,SMAD4,HDAC8,ASXL1,KAT6A,TCF4,KMT2A
GO Process	GO:0051646	Mitochondrion localization	4	46	1.56	0.00054	MFN2,ALB,OPA1,DNM1L
GO Process	GO:0032268	Regulation of cellular protein metabolic process	19	2693	0.47	0.00055	HTRA2,DPH1,SOD1,KIT,SHH,PPP2R1A,WT1,PTPN11,SMAD4,RET,SPRED2,ACTB,NF1,TGFBR2,MTOR,HDAC8,KMT2A,DNM1L,CERS1
GO Process	GO:0048646	Anatomical structure formation involved in morphogenesis	11	883	0.71	0.00056	MFN2,NOTCH3,SHH,WT1,PTCH1,PTPN11,SMAD4,RET,SLC25A46,TGFBR2,ADA
GO Process	GO:0010942	Positive regulation of cell death	10	719	0.76	0.00061	MFN2,HTRA2,SOD1,PPP2R1A,WT1,RET,NF1,MTOR,PSEN2,DNM1L
GO Process	GO:0048608	Reproductive structure development	8	420	0.9	0.00062	SOD1,KIT,SHH,WT1,PTCH1,PTPN11,SMAD4,ADA
GO Process	GO:2000112	Regulation of cellular macromolecule biosynthetic process	23	3878	0.39	0.00062	CDK13,LZTR1,SIX3,CREBBP,DPH1,NOTCH3,KIT,SHH,CDT1,KMT2D,PPP2R1A,WT1,PTCH1,SMAD4,RET,MTOR,SOX3,HDAC8,ASXL1,KAT6A,TCF4,KMT2A,CERS1
GO Process	GO:0000902	Cell morphogenesis	10	726	0.76	0.00063	NOTCH3,SOD1,SHH,PTCH1,PTPN11,SMAD4,RET,SLC25A46,ACTB,ASXL1
GO Process	GO:0002682	Regulation of immune system process	14	1514	0.59	0.00068	CREBBP,SETD1A,SOD1,KIT,SHH,KMT2D,PTPN11,ACTB,NF1,TGFBR2,MTOR,ADA,KMT2A,DNM1L
GO Process	GO:0072075	Metanephric mesenchyme development	3	14	1.95	0.00069	SHH,WT1,SMAD4
GO Process	GO:0006915	Apoptotic process	11	918	0.7	0.00073	MFN2,HTRA2,SIX3,SHH,PPP2R1A,NF1,TGFBR2,MTOR,OPA1,KMT2A,DNM1L
GO Process	GO:0008284	Positive regulation of cell population proliferation	11	919	0.7	0.00073	CDK13,MFN2,NOTCH3,KIT,SHH,KMT2D,SMAD4,NF1,TGFBR2,MTOR,ADA
GO Process	GO:0045934	Negative regulation of nucleobase-containing compound metabolic process	14	1528	0.58	0.00073	SIX3,CREBBP,NOTCH3,SHH,KMT2D,WT1,PTCH1,SMAD4,MTOR,SOX3,HDAC8,KAT6A,KMT2A,CERS1
GO Process	GO:0051049	Regulation of transport	15	1776	0.55	0.00084	HTRA2,SOD1,SHH,PTCH1,PTPN11,SMAD4,ACTB,NF1,MTOR,PSEN2,DNAJC6,ADA,KMT2A,CLTCL1,DNM1L
GO Process	GO:0017015	Regulation of transforming growth factor beta receptor signaling pathway	5	119	1.24	0.00088	CREBBP,LEMD3,SMAD4,SPRED2,TGFBR2
GO Process	GO:0048568	Embryonic organ development	8	448	0.87	0.00088	SIX3,SOD1,KIT,SHH,PTCH1,TGFBR2,ADA,KMT2A
GO Process	GO:0003006	Developmental process involved in reproduction	11	945	0.69	0.00091	SOD1,KIT,SHH,KMT2D,WT1,PTCH1,PTPN11,SMAD4,MTOR,SOX3,ADA
GO Process	GO:0006355	Regulation of transcription, dna-templated	21	3388	0.41	0.00093	CDK13,LZTR1,SIX3,CREBBP,NOTCH3,KIT,SHH,CDT1,KMT2D,PPP2R1A,WT1,PTCH1,SMAD4,RET,MTOR,SOX3,HDAC8,ASXL1,KAT6A,TCF4,KMT2A
GO Process	GO:1901700	Response to oxygen-containing compound	14	1567	0.57	0.00093	HTRA2,SOD1,CDT1,WT1,PTCH1,RET,ACTB,TGFBR2,MTOR,OPA1,ADA,ASXL1,DNM1L,CERS1
GO Process	GO:0009892	Negative regulation of metabolic process	20	3124	0.43	0.0010	HTRA2,SIX3,CREBBP,NOTCH3,SOD1,SHH,SLC18A2,KMT2D,PPP2R1A,WT1,PTCH1,SMAD4,SPRED2,NF1,MTOR,SOX3,HDAC8,KAT6A,KMT2A,CERS1
GO Process	GO:0048565	Digestive tract development	5	128	1.21	0.0012	KIT,SHH,RET,TGFBR2,ADA
GO Process	GO:0009890	Negative regulation of biosynthetic process	14	1624	0.55	0.0013	SIX3,CREBBP,NOTCH3,SOD1,SHH,SLC18A2,KMT2D,WT1,PTCH1,SMAD4,SOX3,HDAC8,KAT6A,CERS1
GO Process	GO:0022414	Reproductive process	13	1400	0.59	0.0013	SOD1,KIT,SHH,KMT2D,PPP2R1A,WT1,PTCH1,PTPN11,SMAD4,TGFBR2,MTOR,SOX3,ADA
GO Process	GO:0043170	Macromolecule metabolic process	29	6137	0.29	0.0013	CDK13,LZTR1,HTRA2,CREBBP,SETD1A,DPH1,NOTCH3,KIT,ALB,SHH,CDT1,KMT2D,DUOXA2,PPP2R1A,WT1,PTCH1,PTPN11,SMAD4,RET,ACTB,NF1,TGFBR2,MTOR,PSEN2,DNAJC6,HDAC8,ASXL1,KAT6A,KMT2A
GO Process	GO:0043405	Regulation of map kinase activity	7	342	0.93	0.0013	SOD1,KIT,PPP2R1A,PTPN11,RET,SPRED2,NF1
GO Process	GO:0045597	Positive regulation of cell differentiation	11	993	0.66	0.0013	KIT,SHH,PTCH1,SMAD4,RET,TGFBR2,MTOR,OPA1,ADA,TCF4,DNM1L
GO Process	GO:0048754	Branching morphogenesis of an epithelial tube	5	131	2023-02-01	0.0013	SHH,WT1,PTCH1,SMAD4,TGFBR2
GO Process	GO:0051604	Protein maturation	6	225	2023-05-01	0.0013	HTRA2,CREBBP,SHH,DUOXA2,PTCH1,PSEN2
GO Process	GO:0000266	Mitochondrial fission	3	20	2023-08-01	0.0014	SLC25A46,OPA1,DNM1L
GO Process	GO:0016570	Histone modification	7	351	0.92	0.0014	CREBBP,SETD1A,KMT2D,HDAC8,ASXL1,KAT6A,KMT2A
GO Process	GO:0031399	Regulation of protein modification process	15	1870	0.52	0.0014	SOD1,KIT,PPP2R1A,PTPN11,SMAD4,RET,SPRED2,ACTB,NF1,TGFBR2,MTOR,HDAC8,KMT2A,DNM1L,CERS1
GO Process	GO:0042127	Regulation of cell population proliferation	14	1642	0.55	0.0014	CDK13,MFN2,SIX3,NOTCH3,KIT,SHH,KMT2D,WT1,PTCH1,SMAD4,NF1,TGFBR2,MTOR,ADA
GO Process	GO:0044238	Primary metabolic process	32	7332	0.26	0.0014	CDK13,LZTR1,IYD,HTRA2,CREBBP,SETD1A,DPH1,NOTCH3,KIT,ALB,SHH,KMT2D,DUOXA2,PPP2R1A,WT1,PTCH1,PTPN11,SMAD4,RET,ACTB,NF1,TGFBR2,MTOR,OPA1,PSEN2,DNAJC6,ADA,HDAC8,ASXL1,KAT6A,KMT2A,CERS1
GO Process	GO:0045859	Regulation of protein kinase activity	10	812	0.71	0.0014	SOD1,KIT,PPP2R1A,PTPN11,RET,SPRED2,ACTB,NF1,TGFBR2,MTOR
GO Process	GO:0060548	Negative regulation of cell death	11	999	0.66	0.0014	HTRA2,SOD1,KIT,ALB,SHH,WT1,SMAD4,MTOR,OPA1,PSEN2,ADA
GO Process	GO:0070887	Cellular response to chemical stimulus	19	2919	0.43	0.0014	IYD,HTRA2,CREBBP,SOD1,KIT,ALB,SHH,WT1,PTCH1,PTPN11,SMAD4,RET,SPRED2,ACTB,TGFBR2,MTOR,OPA1,DNM1L,CERS1
GO Process	GO:0080182	Histone h3-k4 trimethylation	3	20	2023-08-01	0.0014	SETD1A,KMT2D,KMT2A
GO Process	GO:0007569	Cell aging	4	66	2023-04-01	0.0015	SOD1,MTOR,OPA1,KAT6A
GO Process	GO:0048666	Neuron development	10	827	0.7	0.0015	HTRA2,NOTCH3,SOD1,SHH,PTCH1,PTPN11,SMAD4,RET,SLC25A46,ACTB
GO Process	GO:0043065	Positive regulation of apoptotic process	9	660	0.75	0.0016	MFN2,HTRA2,SOD1,PPP2R1A,WT1,RET,NF1,PSEN2,DNM1L
GO Process	GO:0045664	Regulation of neuron differentiation	9	665	0.75	0.0016	SIX3,NOTCH3,SHH,RET,MTOR,OPA1,SOX3,TCF4,DNM1L
GO Process	GO:0051172	Negative regulation of nitrogen compound metabolic process	17	2429	0.46	0.0016	SIX3,CREBBP,NOTCH3,SHH,KMT2D,PPP2R1A,WT1,PTCH1,SMAD4,SPRED2,NF1,MTOR,SOX3,HDAC8,KAT6A,KMT2A,CERS1
GO Process	GO:0006357	Regulation of transcription by rna polymerase ii	16	2172	0.49	0.0017	CDK13,SIX3,CREBBP,NOTCH3,KIT,SHH,KMT2D,WT1,PTCH1,SMAD4,SOX3,HDAC8,ASXL1,KAT6A,TCF4,KMT2A
GO Process	GO:0009880	Embryonic pattern specification	4	69	1.38	0.0017	SHH,WT1,PTCH1,SMAD4
GO Process	GO:0035162	Embryonic hemopoiesis	3	22	1.75	0.0017	KIT,TGFBR2,KMT2A
GO Process	GO:0048745	Smooth muscle tissue development	3	22	1.75	0.0017	SHH,PTCH1,NF1
GO Process	GO:0045165	Cell fate commitment	6	248	1.0	0.0018	NOTCH3,SHH,WT1,PTCH1,SMAD4,MTOR
GO Process	GO:0003007	Heart morphogenesis	6	251	1.0	0.0019	SHH,PTCH1,SMAD4,TGFBR2,MTOR,ASXL1
GO Process	GO:0031175	Neuron projection development	9	680	0.74	0.0019	NOTCH3,SOD1,SHH,PTCH1,PTPN11,SMAD4,RET,SLC25A46,ACTB
GO Process	GO:0071900	Regulation of protein serine/threonine kinase activity	8	521	0.81	0.0019	SOD1,KIT,PPP2R1A,PTPN11,RET,SPRED2,ACTB,NF1
GO Process	GO:0090149	Mitochondrial membrane fission	2	2	2.62	0.0019	SLC25A46,DNM1L
GO Process	GO:0018193	Peptidyl-amino acid modification	10	867	0.68	0.0020	CREBBP,SETD1A,DPH1,KIT,KMT2D,RET,TGFBR2,MTOR,KAT6A,KMT2A
GO Process	GO:0051179	Localization	27	5591	0.3	0.0020	CDK13,TG,MFN2,SIX3,SOD1,KIT,ALB,SHH,SLC18A2,CDT1,DUOXA2,PPP2R1A,PTCH1,PTPN11,RET,SLC25A46,ACTB,NF1,TGFBR2,MTOR,OPA1,PSEN2,DNAJC6,ADA,CLTCL1,DNM1L,ALMS1
GO Process	GO:0072359	Circulatory system development	10	872	0.68	0.0021	NOTCH3,SHH,WT1,PTCH1,PTPN11,SMAD4,NF1,TGFBR2,MTOR,ASXL1
GO Process	GO:0007548	Sex differentiation	6	259	0.98	0.0022	SOD1,KIT,SHH,WT1,PTPN11,SMAD4
GO Process	GO:0009611	Response to wounding	8	532	0.8	0.0022	MFN2,SOD1,SHH,PTPN11,ACTB,NF1,TGFBR2,MTOR
GO Process	GO:0045637	Regulation of myeloid cell differentiation	6	260	0.98	0.0022	CREBBP,SETD1A,KMT2D,NF1,MTOR,KMT2A
GO Process	GO:0048589	Developmental growth	7	389	0.87	0.0023	SHH,ANKRD11,KMT2D,PTPN11,SMAD4,TGFBR2,MTOR
GO Process	GO:0048863	Stem cell differentiation	5	156	1.13	0.0023	SIX3,KIT,SHH,SMAD4,RET
GO Process	GO:0019219	Regulation of nucleobase-containing compound metabolic process	22	3982	0.36	0.0024	CDK13,LZTR1,SIX3,CREBBP,NOTCH3,KIT,SHH,CDT1,KMT2D,PPP2R1A,WT1,PTCH1,SMAD4,RET,MTOR,SOX3,HDAC8,ASXL1,KAT6A,TCF4,KMT2A,CERS1
GO Process	GO:0022603	Regulation of anatomical structure morphogenesis	11	1095	0.62	0.0025	KIT,SHH,WT1,SMAD4,RET,NF1,TGFBR2,MTOR,OPA1,ADA,DNM1L
GO Process	GO:0033043	Regulation of organelle organization	12	1306	0.58	0.0025	CDK13,MFN2,HTRA2,SETD1A,CDT1,SMAD4,MTOR,OPA1,HDAC8,KMT2A,DNM1L,ALMS1
GO Process	GO:0044260	Cellular macromolecule metabolic process	25	4976	0.32	0.0025	CDK13,LZTR1,HTRA2,CREBBP,SETD1A,DPH1,NOTCH3,KIT,ALB,CDT1,KMT2D,PPP2R1A,PTPN11,SMAD4,RET,ACTB,NF1,TGFBR2,MTOR,PSEN2,DNAJC6,HDAC8,ASXL1,KAT6A,KMT2A
GO Process	GO:0007167	Enzyme linked receptor protein signaling pathway	9	720	0.72	0.0027	KIT,PTPN11,SMAD4,RET,SPRED2,ACTB,TGFBR2,PSEN2,CERS1
GO Process	GO:0033081	Regulation of t cell differentiation in thymus	3	27	1.67	0.0027	SOD1,SHH,ADA
GO Process	GO:0043069	Negative regulation of programmed cell death	10	908	0.66	0.0027	HTRA2,SOD1,KIT,ALB,SHH,WT1,MTOR,OPA1,PSEN2,ADA
GO Process	GO:0007411	Axon guidance	6	275	0.96	0.0028	NOTCH3,SHH,PTCH1,PTPN11,SMAD4,RET
GO Process	GO:0060429	Epithelium development	11	1109	0.62	0.0028	SIX3,SOD1,SHH,WT1,PTCH1,SMAD4,RET,ACTB,NF1,TGFBR2,ASXL1
GO Process	GO:0022011	Myelination in peripheral nervous system	3	28	1.65	0.0029	SOD1,SLC25A46,NF1
GO Process	GO:0048729	Tissue morphogenesis	8	561	0.77	0.0029	SIX3,SHH,WT1,PTCH1,SMAD4,RET,ACTB,TGFBR2
GO Process	GO:2001233	Regulation of apoptotic signaling pathway	7	409	0.85	0.0029	HTRA2,SOD1,PPP2R1A,RET,NF1,OPA1,DNM1L
GO Process	GO:0051050	Positive regulation of transport	10	923	0.65	0.0030	HTRA2,SOD1,SHH,PTCH1,PTPN11,SMAD4,ACTB,KMT2A,CLTCL1,DNM1L
GO Process	GO:0007610	Behavior	8	572	0.77	0.0032	HTRA2,SIX3,SOD1,KIT,SLC18A2,SLC25A46,NF1,MTOR
GO Process	GO:0009987	Cellular process	46	15024	0.11	0.0032	CDK13,LZTR1,TG,IYD,MFN2,HTRA2,SIX3,CREBBP,SETD1A,DPH1,NOTCH3,SOD1,KIT,ALB,SHH,SLC18A2,CDT1,KMT2D,LEMD3,DUOXA2,PPP2R1A,WT1,PTCH1,PTPN11,SMAD4,RET,SLC25A46,SPRED2,ACTB,NF1,TGFBR2,MTOR,OPA1,PSEN2,SOX3,DNAJC6,ADA,HDAC8,ASXL1,KAT6A,TCF4,KMT2A,CLTCL1,DNM1L,ALMS1,CERS1
GO Process	GO:0048598	Embryonic morphogenesis	8	571	0.77	0.0032	SIX3,CREBBP,SOD1,SHH,PTCH1,SMAD4,RET,TGFBR2
GO Process	GO:1902105	Regulation of leukocyte differentiation	6	285	0.94	0.0033	SOD1,SHH,NF1,TGFBR2,MTOR,ADA
GO Process	GO:0048661	Positive regulation of smooth muscle cell proliferation	4	88	1.28	0.0035	MFN2,NOTCH3,TGFBR2,MTOR
GO Process	GO:0010001	Glial cell differentiation	5	178	2023-07-01	0.0037	SOD1,SHH,PTPN11,SLC25A46,NF1
GO Process	GO:0010717	Regulation of epithelial to mesenchymal transition	4	90	1.27	0.0037	SMAD4,SPRED2,TGFBR2,MTOR
GO Process	GO:0060537	Muscle tissue development	6	294	0.93	0.0038	SHH,WT1,PTCH1,SMAD4,NF1,MTOR
GO Process	GO:0006897	Endocytosis	7	433	0.83	0.0039	ALB,SHH,ACTB,TGFBR2,DNAJC6,CLTCL1,DNM1L
GO Process	GO:1902692	Regulation of neuroblast proliferation	3	32	1.59	0.0039	SIX3,SHH,NF1
GO Process	GO:0002009	Morphogenesis of an epithelium	7	435	0.83	0.0040	SHH,WT1,PTCH1,SMAD4,RET,ACTB,TGFBR2
GO Process	GO:0016571	Histone methylation	4	93	1.25	0.0041	CREBBP,SETD1A,KMT2D,KMT2A
GO Process	GO:0042060	Wound healing	7	439	0.82	0.0041	MFN2,SHH,PTPN11,ACTB,NF1,TGFBR2,MTOR
GO Process	GO:0051094	Positive regulation of developmental process	12	1389	0.56	0.0041	KIT,SHH,WT1,PTCH1,SMAD4,RET,TGFBR2,MTOR,OPA1,ADA,TCF4,DNM1L
GO Process	GO:1990086	Lens fiber cell apoptotic process	2	4	2.32	0.0041	SIX3,TGFBR2
GO Process	GO:0071495	Cellular response to endogenous stimulus	11	1181	0.59	0.0044	SOD1,KIT,WT1,PTPN11,SMAD4,SPRED2,ACTB,TGFBR2,MTOR,OPA1,CERS1
GO Process	GO:0046620	Regulation of organ growth	4	96	1.24	0.0046	SOD1,WT1,TGFBR2,MTOR
GO Process	GO:0060562	Epithelial tube morphogenesis	6	307	0.91	0.0046	SHH,WT1,PTCH1,SMAD4,RET,TGFBR2
GO Process	GO:2000377	Regulation of reactive oxygen species metabolic process	5	188	2023-04-01	0.0046	SOD1,SLC18A2,DUOXA2,TGFBR2,MTOR
GO Process	GO:0051253	Negative regulation of rna metabolic process	12	1422	0.55	0.0049	SIX3,CREBBP,NOTCH3,SHH,KMT2D,WT1,PTCH1,SMAD4,MTOR,SOX3,HDAC8,KAT6A
GO Process	GO:0061024	Membrane organization	9	796	0.67	0.0050	MFN2,SOD1,PPP2R1A,SLC25A46,ACTB,OPA1,DNAJC6,CLTCL1,DNM1L
GO Process	GO:0048859	Formation of anatomical boundary	2	5	2.22	0.0055	SHH,SMAD4
GO Process	GO:0060541	Respiratory system development	5	197	2023-02-01	0.0055	SHH,WT1,TGFBR2,ADA,ASXL1
GO Process	GO:0009719	Response to endogenous stimulus	12	1447	0.54	0.0057	SOD1,KIT,KMT2D,WT1,PTPN11,SMAD4,SPRED2,ACTB,TGFBR2,MTOR,OPA1,CERS1
GO Process	GO:0060348	Bone development	5	199	2023-02-01	0.0057	KIT,ANKRD11,PTPN11,TGFBR2,ASXL1
GO Process	GO:2000379	Positive regulation of reactive oxygen species metabolic process	4	103	1.21	0.0057	SOD1,DUOXA2,TGFBR2,MTOR
GO Process	GO:0010638	Positive regulation of organelle organization	8	633	0.72	0.0058	MFN2,HTRA2,CDT1,SMAD4,MTOR,OPA1,KMT2A,DNM1L
GO Process	GO:0051726	Regulation of cell cycle	11	1230	0.57	0.0059	CDK13,HTRA2,SIX3,CDT1,PPP2R1A,PTCH1,PTPN11,ACTB,MTOR,HDAC8,ALMS1
GO Process	GO:0001932	Regulation of protein phosphorylation	12	1459	0.53	0.0060	SOD1,KIT,PPP2R1A,PTPN11,SMAD4,RET,SPRED2,ACTB,NF1,TGFBR2,MTOR,CERS1
GO Process	GO:0043009	Chordate embryonic development	8	640	0.72	0.0061	MFN2,SHH,ANKRD11,PTCH1,SMAD4,NF1,TGFBR2,ADA
GO Process	GO:0000578	Embryonic axis specification	3	39	1.51	0.0062	WT1,PTCH1,SMAD4
GO Process	GO:0010721	Negative regulation of cell development	6	330	0.88	0.0064	SIX3,NOTCH3,SHH,SMAD4,NF1,SOX3
GO Process	GO:0050769	Positive regulation of neurogenesis	7	479	0.78	0.0065	KIT,SHH,RET,MTOR,OPA1,TCF4,DNM1L
GO Process	GO:0048638	Regulation of developmental growth	6	333	0.88	0.0066	HTRA2,SOD1,WT1,PTCH1,TGFBR2,MTOR
GO Process	GO:0048713	Regulation of oligodendrocyte differentiation	3	40	1.49	0.0066	SHH,NF1,MTOR
GO Process	GO:0090184	Positive regulation of kidney development	3	40	1.49	0.0066	SHH,WT1,RET
GO Process	GO:0032526	Response to retinoic acid	4	109	1.18	0.0067	HTRA2,PTCH1,RET,ASXL1
GO Process	GO:0097237	Cellular response to toxic substance	4	109	1.18	0.0067	IYD,SOD1,ALB,CERS1
GO Process	GO:0072298	Regulation of metanephric glomerulus development	2	6	2.14	0.0068	WT1,RET
GO Process	GO:0021510	Spinal cord development	4	110	1.18	0.0069	SHH,PTCH1,NF1,MTOR
GO Process	GO:0035239	Tube morphogenesis	8	656	0.71	0.0070	NOTCH3,SHH,WT1,PTCH1,SMAD4,RET,NF1,TGFBR2
GO Process	GO:0060485	Mesenchyme development	5	212	0.99	0.0072	SHH,WT1,SMAD4,RET,TGFBR2
GO Process	GO:0021782	Glial cell development	4	112	1.17	0.0073	SOD1,SHH,SLC25A46,NF1
GO Process	GO:0050896	Response to stimulus	32	8046	0.22	0.0074	CDK13,TG,IYD,MFN2,HTRA2,CREBBP,NOTCH3,SOD1,KIT,ALB,SHH,SLC18A2,CDT1,KMT2D,PPP2R1A,WT1,PTCH1,PTPN11,SMAD4,RET,SPRED2,ACTB,NF1,TGFBR2,MTOR,OPA1,PSEN2,ADA,ASXL1,KAT6A,DNM1L,CERS1
GO Process	GO:1901701	Cellular response to oxygen-containing compound	10	1055	0.6	0.0075	HTRA2,SOD1,WT1,PTCH1,RET,ACTB,MTOR,OPA1,DNM1L,CERS1
GO Process	GO:1903146	Regulation of autophagy of mitochondrion	3	43	1.46	0.0077	MFN2,HTRA2,DNM1L
GO Process	GO:0001894	Tissue homeostasis	5	219	0.98	0.0081	SOD1,ALB,ANKRD11,PTPN11,ACTB
GO Process	GO:0009636	Response to toxic substance	5	219	0.98	0.0081	IYD,HTRA2,SOD1,ALB,CERS1
GO Process	GO:0009888	Tissue development	13	1760	0.49	0.0081	SIX3,SOD1,SHH,WT1,PTCH1,SMAD4,RET,ACTB,NF1,TGFBR2,MTOR,ADA,ASXL1
GO Process	GO:0051276	Chromosome organization	10	1066	0.59	0.0081	CREBBP,SETD1A,CDT1,KMT2D,PPP2R1A,ACTB,HDAC8,ASXL1,KAT6A,KMT2A
GO Process	GO:0060999	Positive regulation of dendritic spine development	3	44	1.45	0.0081	MTOR,OPA1,DNM1L
GO Process	GO:0061005	Cell differentiation involved in kidney development	3	44	1.45	0.0081	WT1,PTCH1,ASXL1
GO Process	GO:0036302	Atrioventricular canal development	2	7	2023-08-02	0.0082	PTPN11,SMAD4
GO Process	GO:0040008	Regulation of growth	8	676	0.69	0.0082	HTRA2,SOD1,PPP2R1A,WT1,PTCH1,SMAD4,TGFBR2,MTOR
GO Process	GO:0060463	Lung lobe morphogenesis	2	7	2023-08-02	0.0082	SHH,TGFBR2
GO Process	GO:0072203	Cell proliferation involved in metanephros development	2	7	2023-08-02	0.0082	SHH,PTCH1
GO Process	GO:0010558	Negative regulation of macromolecule biosynthetic process	12	1534	0.51	0.0087	SIX3,CREBBP,NOTCH3,SHH,KMT2D,WT1,PTCH1,SMAD4,SOX3,HDAC8,KAT6A,CERS1
GO Process	GO:0007219	Notch signaling pathway	4	120	1.14	0.0089	CREBBP,NOTCH3,TGFBR2,PSEN2
GO Process	GO:0043933	Protein-containing complex subunit organization	12	1539	0.51	0.0089	CREBBP,ALB,CDT1,KMT2D,PPP2R1A,SMAD4,OPA1,DNAJC6,KAT6A,TCF4,KMT2A,DNM1L
GO Process	GO:0046638	Positive regulation of alpha-beta t cell differentiation	3	46	1.43	0.0089	SHH,TGFBR2,ADA
GO Process	GO:0048538	Thymus development	3	46	1.43	0.0089	SOD1,SHH,ASXL1
GO Process	GO:0099504	Synaptic vesicle cycle	4	120	1.14	0.0089	SLC18A2,ACTB,DNAJC6,DNM1L
GO Process	GO:1905953	Negative regulation of lipid localization	3	46	1.43	0.0089	SHH,PTPN11,ASXL1
GO Process	GO:0010822	Positive regulation of mitochondrion organization	4	121	1.14	0.0090	MFN2,HTRA2,OPA1,DNM1L
GO Process	GO:0010605	Negative regulation of macromolecule metabolic process	17	2875	0.39	0.0091	SIX3,CREBBP,NOTCH3,SHH,KMT2D,PPP2R1A,WT1,PTCH1,SMAD4,SPRED2,NF1,MTOR,SOX3,HDAC8,KAT6A,KMT2A,CERS1
GO Process	GO:0008542	Visual learning	3	47	1.42	0.0092	KIT,NF1,MTOR
GO Process	GO:0010718	Positive regulation of epithelial to mesenchymal transition	3	47	1.42	0.0092	SMAD4,TGFBR2,MTOR
GO Process	GO:0006950	Response to stress	19	3485	0.36	0.0094	MFN2,HTRA2,CREBBP,SOD1,KIT,ALB,SHH,PTPN11,SMAD4,RET,ACTB,NF1,TGFBR2,MTOR,OPA1,PSEN2,ADA,KAT6A,DNM1L
GO Process	GO:0007166	Cell surface receptor signaling pathway	15	2325	0.43	0.0095	CREBBP,NOTCH3,SOD1,KIT,SHH,PTCH1,PTPN11,SMAD4,RET,SPRED2,ACTB,NF1,TGFBR2,PSEN2,CERS1
GO Process	GO:0033628	Regulation of cell adhesion mediated by integrin	3	48	1.42	0.0096	PTPN11,RET,ADA
GO Process	GO:0043066	Negative regulation of apoptotic process	9	893	0.62	0.0096	HTRA2,SOD1,ALB,SHH,WT1,MTOR,OPA1,PSEN2,ADA
GO Process	GO:0048312	Intracellular distribution of mitochondria	2	8	2023-02-02	0.0096	OPA1,DNM1L
GO Process	GO:0048488	Synaptic vesicle endocytosis	3	48	1.42	0.0096	ACTB,DNAJC6,DNM1L
GO Process	GO:0048806	Genitalia development	3	48	1.42	0.0096	SHH,WT1,PTPN11
GO Process	GO:0060020	Bergmann glial cell differentiation	2	8	2023-02-02	0.0096	SHH,PTPN11
GO Process	GO:0060324	Face development	3	48	1.42	0.0096	ANKRD11,PTPN11,SOX3
GO Process	GO:0090257	Regulation of muscle system process	5	231	0.95	0.0096	SOD1,KIT,SMAD4,MTOR,ADA
GO Process	GO:1903507	Negative regulation of nucleic acid-templated transcription	11	1324	0.54	0.0096	SIX3,CREBBP,NOTCH3,SHH,KMT2D,WT1,PTCH1,SMAD4,SOX3,HDAC8,KAT6A
GO Process	GO:0030326	Embryonic limb morphogenesis	4	127	2023-12-01	0.0102	CREBBP,SHH,PTCH1,SMAD4
GO Process	GO:0051234	Establishment of localization	22	4479	0.31	0.0102	CDK13,TG,MFN2,SIX3,SOD1,KIT,ALB,SHH,SLC18A2,CDT1,DUOXA2,SLC25A46,ACTB,NF1,TGFBR2,OPA1,PSEN2,DNAJC6,ADA,CLTCL1,DNM1L,ALMS1
GO Process	GO:0006325	Chromatin organization	8	713	0.67	0.0106	CREBBP,SETD1A,KMT2D,ACTB,HDAC8,ASXL1,KAT6A,KMT2A
GO Process	GO:0022607	Cellular component assembly	15	2359	0.42	0.0106	MFN2,CREBBP,KIT,CDT1,KMT2D,PPP2R1A,SMAD4,SLC25A46,ACTB,OPA1,KAT6A,TCF4,KMT2A,DNM1L,ALMS1
GO Process	GO:0014070	Response to organic cyclic compound	9	911	0.61	0.0107	SOD1,WT1,PTCH1,ACTB,TGFBR2,MTOR,OPA1,ADA,DNM1L
GO Process	GO:0032147	Activation of protein kinase activity	6	376	0.82	0.0107	SOD1,KIT,PTPN11,RET,TGFBR2,MTOR
GO Process	GO:0071310	Cellular response to organic substance	15	2369	0.42	0.0110	HTRA2,SOD1,KIT,WT1,PTCH1,PTPN11,SMAD4,RET,SPRED2,ACTB,TGFBR2,MTOR,OPA1,DNM1L,CERS1
GO Process	GO:0031327	Negative regulation of cellular biosynthetic process	12	1592	0.5	0.0111	SIX3,CREBBP,NOTCH3,SHH,KMT2D,WT1,PTCH1,SMAD4,SOX3,HDAC8,KAT6A,CERS1
GO Process	GO:0044093	Positive regulation of molecular function	13	1842	0.47	0.0111	HTRA2,SOD1,KIT,SHH,CDT1,PTPN11,RET,NF1,TGFBR2,MTOR,PSEN2,KMT2A,DNM1L
GO Process	GO:0048541	Peyers patch development	2	9	1.97	0.0111	RET,ADA
GO Process	GO:0051649	Establishment of localization in cell	15	2375	0.42	0.0111	CDK13,MFN2,SIX3,SOD1,KIT,ALB,SLC18A2,CDT1,ACTB,NF1,OPA1,DNAJC6,CLTCL1,DNM1L,ALMS1
GO Process	GO:0001701	In utero embryonic development	6	382	0.82	0.0112	MFN2,ANKRD11,PTCH1,SMAD4,TGFBR2,ADA
GO Process	GO:0003179	Heart valve morphogenesis	3	52	1.38	0.0112	SMAD4,TGFBR2,MTOR
GO Process	GO:0009948	Anterior/posterior axis specification	3	52	1.38	0.0112	SHH,WT1,SMAD4
GO Process	GO:0043408	Regulation of mapk cascade	8	725	0.66	0.0113	SOD1,KIT,PPP2R1A,PTPN11,SMAD4,RET,SPRED2,NF1
GO Process	GO:0006935	Chemotaxis	7	545	0.73	0.0114	NOTCH3,KIT,SHH,PTCH1,PTPN11,SMAD4,RET
GO Process	GO:0016202	Regulation of striated muscle tissue development	4	133	2023-01-01	0.0115	SHH,SMAD4,TGFBR2,MTOR
GO Process	GO:0001541	Ovarian follicle development	3	53	1.37	0.0116	SOD1,KIT,SMAD4
GO Process	GO:0030900	Forebrain development	6	387	0.81	0.0116	HTRA2,SIX3,NOTCH3,SHH,NF1,SOX3
GO Process	GO:0032835	Glomerulus development	3	53	1.37	0.0116	NOTCH3,WT1,ASXL1
GO Process	GO:0045926	Negative regulation of growth	5	247	0.93	0.0116	PPP2R1A,WT1,PTCH1,SMAD4,TGFBR2
GO Process	GO:0046580	Negative regulation of ras protein signal transduction	3	53	1.37	0.0116	LZTR1,MFN2,NF1
GO Process	GO:1901862	Negative regulation of muscle tissue development	3	53	1.37	0.0116	SHH,SMAD4,TGFBR2
GO Process	GO:2000145	Regulation of cell motility	9	929	0.61	0.0116	KIT,SHH,DUOXA2,RET,NF1,TGFBR2,MTOR,ADA,DNM1L
GO Process	GO:0032880	Regulation of protein localization	9	934	0.6	0.0119	HTRA2,SHH,CDT1,PTCH1,PTPN11,ACTB,NF1,HDAC8,DNM1L
GO Process	GO:0048708	Astrocyte differentiation	3	55	1.36	0.0123	SHH,PTPN11,NF1
GO Process	GO:0072205	Metanephric collecting duct development	2	10	1.92	0.0123	SHH,PTCH1
GO Process	GO:1903827	Regulation of cellular protein localization	7	568	0.71	0.0136	HTRA2,SHH,CDT1,PTPN11,ACTB,NF1,HDAC8
GO Process	GO:0051152	Positive regulation of smooth muscle cell differentiation	2	11	1.88	0.0144	KIT,SHH
GO Process	GO:0060439	Trachea morphogenesis	2	11	1.88	0.0144	SHH,TGFBR2
GO Process	GO:2000615	Regulation of histone h3-k9 acetylation	2	11	1.88	0.0144	SMAD4,KMT2A
GO Process	GO:0006940	Regulation of smooth muscle contraction	3	60	1.32	0.0153	SOD1,KIT,ADA
GO Process	GO:0045580	Regulation of t cell differentiation	4	147	2023-05-01	0.0153	SOD1,SHH,TGFBR2,ADA
GO Process	GO:0042733	Embryonic digit morphogenesis	3	61	1.31	0.0159	CREBBP,SHH,SMAD4
GO Process	GO:0010823	Negative regulation of mitochondrion organization	3	62	2023-03-01	0.0163	HTRA2,OPA1,DNM1L
GO Process	GO:0033089	Positive regulation of t cell differentiation in thymus	2	12	1.84	0.0163	SHH,ADA
GO Process	GO:0048511	Rhythmic process	5	271	0.89	0.0163	SIX3,CREBBP,MTOR,KMT2A,DNM1L
GO Process	GO:1905952	Regulation of lipid localization	4	151	2023-04-01	0.0165	SHH,PTCH1,PTPN11,ASXL1
GO Process	GO:0051130	Positive regulation of cellular component organization	10	1209	0.54	0.0166	MFN2,HTRA2,KIT,CDT1,SMAD4,RET,MTOR,OPA1,KMT2A,DNM1L
GO Process	GO:0006665	Sphingolipid metabolic process	4	153	2023-04-01	0.0171	HTRA2,KIT,PPP2R1A,CERS1
GO Process	GO:0006810	Transport	21	4353	0.3	0.0171	CDK13,TG,MFN2,SIX3,SOD1,KIT,ALB,SHH,SLC18A2,DUOXA2,SLC25A46,ACTB,NF1,TGFBR2,OPA1,PSEN2,DNAJC6,ADA,CLTCL1,DNM1L,ALMS1
GO Process	GO:0051147	Regulation of muscle cell differentiation	4	154	2023-03-01	0.0175	KIT,SHH,SMAD4,MTOR
GO Process	GO:0002320	Lymphoid progenitor cell differentiation	2	13	1.81	0.0183	KIT,SHH
GO Process	GO:0010635	Regulation of mitochondrial fusion	2	13	1.81	0.0183	OPA1,DNM1L
GO Process	GO:0014706	Striated muscle tissue development	5	280	0.87	0.0183	SHH,WT1,SMAD4,NF1,MTOR
GO Process	GO:0021978	Telencephalon regionalization	2	13	1.81	0.0183	SIX3,SHH
GO Process	GO:0046661	Male sex differentiation	4	156	2023-03-01	0.0183	KIT,SHH,WT1,SMAD4
GO Process	GO:0000187	Activation of mapk activity	4	157	2023-03-01	0.0184	SOD1,KIT,PTPN11,RET
GO Process	GO:0007389	Pattern specification process	6	432	0.76	0.0184	SIX3,SHH,WT1,PTCH1,SMAD4,TGFBR2
GO Process	GO:0042493	Response to drug	5	281	0.87	0.0184	SOD1,PTCH1,RET,TGFBR2,CERS1
GO Process	GO:0016485	Protein processing	4	158	2023-02-01	0.0187	HTRA2,SHH,PTCH1,PSEN2
GO Process	GO:0048663	Neuron fate commitment	3	66	1.28	0.0187	NOTCH3,SHH,SMAD4
GO Process	GO:2000113	Negative regulation of cellular macromolecule biosynthetic process	11	1470	0.49	0.0187	SIX3,CREBBP,NOTCH3,SHH,KMT2D,WT1,PTCH1,SMAD4,HDAC8,KAT6A,CERS1
GO Process	GO:0060420	Regulation of heart growth	3	67	1.27	0.0193	WT1,TGFBR2,MTOR
GO Process	GO:0048609	Multicellular organismal reproductive process	8	807	0.62	0.0195	SOD1,KIT,KMT2D,PPP2R1A,WT1,PTPN11,SMAD4,MTOR
GO Process	GO:0050768	Negative regulation of neurogenesis	5	287	0.86	0.0198	SIX3,NOTCH3,SHH,NF1,SOX3
GO Process	GO:0003214	Cardiac left ventricle morphogenesis	2	14	1.77	0.0200	SMAD4,TGFBR2
GO Process	GO:0072216	Positive regulation of metanephros development	2	14	1.77	0.0200	WT1,RET
GO Process	GO:1904923	Regulation of autophagy of mitochondrion in response to mitochondrial depolarization	2	14	1.77	0.0200	MFN2,HTRA2
GO Process	GO:0040011	Locomotion	10	1251	0.52	0.0202	SIX3,NOTCH3,KIT,SHH,PTCH1,PTPN11,SMAD4,RET,SLC25A46,ACTB
GO Process	GO:0040014	Regulation of multicellular organism growth	3	69	1.26	0.0204	HTRA2,SOD1,PTCH1
GO Process	GO:2001242	Regulation of intrinsic apoptotic signaling pathway	4	164	2023-01-01	0.0207	HTRA2,SOD1,OPA1,DNM1L
GO Process	GO:0006928	Movement of cell or subcellular component	11	1501	0.48	0.0213	SIX3,NOTCH3,SOD1,KIT,SHH,PTCH1,PTPN11,SMAD4,RET,ACTB,OPA1
GO Process	GO:2000241	Regulation of reproductive process	4	166	1.0	0.0215	SHH,PPP2R1A,WT1,ADA
GO Process	GO:0008053	Mitochondrial fusion	2	15	1.74	0.0219	MFN2,OPA1
GO Process	GO:0043369	CD4-positive or CD8-positive, alpha-beta T cell lineage commitment	2	15	1.74	0.0219	SHH,MTOR
GO Process	GO:0043409	Negative regulation of mapk cascade	4	168	1.0	0.0221	PPP2R1A,SMAD4,SPRED2,NF1
GO Process	GO:0001570	Vasculogenesis	3	72	1.24	0.0224	SHH,WT1,TGFBR2
GO Process	GO:0007224	Smoothened signaling pathway	3	72	1.24	0.0224	SHH,PTCH1,TGFBR2
GO Process	GO:0045892	Negative regulation of transcription, dna-templated	10	1273	0.51	0.0224	SIX3,CREBBP,NOTCH3,SHH,KMT2D,WT1,PTCH1,SMAD4,HDAC8,KAT6A
GO Process	GO:0018205	Peptidyl-lysine modification	5	299	0.84	0.0225	CREBBP,SETD1A,KMT2D,KAT6A,KMT2A
GO Process	GO:0030324	Lung development	4	170	0.99	0.0228	SHH,TGFBR2,ADA,ASXL1
GO Process	GO:0051897	Positive regulation of protein kinase b signaling	4	170	0.99	0.0228	KIT,PTPN11,RET,MTOR
GO Process	GO:0009416	Response to light stimulus	5	302	0.84	0.0234	CREBBP,KIT,NF1,MTOR,CERS1
GO Process	GO:0001895	Retina homeostasis	3	74	1.23	0.0238	SOD1,ALB,ACTB
GO Process	GO:0021536	Diencephalon development	3	74	1.23	0.0238	SIX3,SHH,SOX3
GO Process	GO:0001667	Ameboidal-type cell migration	4	173	0.98	0.0239	KIT,SHH,PTPN11,RET
GO Process	GO:0070102	interleukin-6-mediated signaling pathway	2	16	1.72	0.0239	PTPN11,SMAD4
GO Process	GO:0090185	Negative regulation of kidney development	2	16	1.72	0.0239	SHH,WT1
GO Process	GO:0010467	Gene expression	13	2056	0.42	0.0244	CDK13,HTRA2,CREBBP,NOTCH3,KIT,SHH,DUOXA2,PPP2R1A,WT1,PTCH1,SMAD4,PSEN2,ASXL1
GO Process	GO:0065003	Protein-containing complex assembly	10	1293	0.51	0.0244	CREBBP,CDT1,KMT2D,PPP2R1A,SMAD4,OPA1,KAT6A,TCF4,KMT2A,DNM1L
GO Process	GO:0043407	Negative regulation of map kinase activity	3	76	1.22	0.0251	PPP2R1A,SPRED2,NF1
GO Process	GO:0016192	Vesicle-mediated transport	12	1805	0.44	0.0259	CDK13,SOD1,KIT,ALB,SHH,SLC18A2,ACTB,TGFBR2,DNAJC6,CLTCL1,DNM1L,ALMS1
GO Process	GO:0006590	Thyroid hormone generation	2	17	1.69	0.0260	TG,IYD
GO Process	GO:0021904	Dorsal/ventral neural tube patterning	2	17	1.69	0.0260	SHH,PTCH1
GO Process	GO:0035855	Megakaryocyte development	2	17	1.69	0.0260	KIT,PTPN11
GO Process	GO:0001775	Cell activation	9	1075	0.54	0.0261	CDK13,KIT,SHH,PTPN11,SMAD4,ACTB,TGFBR2,MTOR,ADA
GO Process	GO:0030334	Regulation of cell migration	8	865	0.59	0.0272	KIT,SHH,RET,NF1,TGFBR2,MTOR,ADA,DNM1L
GO Process	GO:0048285	Organelle fission	5	318	0.82	0.0276	CDT1,PPP2R1A,SLC25A46,OPA1,DNM1L
GO Process	GO:0007221	Positive regulation of transcription of notch receptor target	2	18	1.67	0.0280	CREBBP,NOTCH3
GO Process	GO:0051571	Positive regulation of histone h3-k4 methylation	2	18	1.67	0.0280	SMAD4,KMT2A
GO Process	GO:0072112	Glomerular visceral epithelial cell differentiation	2	18	1.67	0.0280	WT1,ASXL1
GO Process	GO:1901524	Regulation of mitophagy	2	18	1.67	0.0280	MFN2,HTRA2
GO Process	GO:0006898	Receptor-mediated endocytosis	4	184	0.96	0.0282	ALB,TGFBR2,DNAJC6,CLTCL1
GO Process	GO:0030512	Negative regulation of transforming growth factor beta receptor signaling pathway	3	81	1.19	0.0286	LEMD3,SPRED2,TGFBR2
GO Process	GO:0055024	Regulation of cardiac muscle tissue development	3	81	1.19	0.0286	SMAD4,TGFBR2,MTOR
GO Process	GO:0050790	Regulation of catalytic activity	14	2386	0.39	0.0288	HTRA2,SOD1,KIT,PPP2R1A,PTPN11,RET,SPRED2,ACTB,NF1,TGFBR2,MTOR,PSEN2,DNM1L,CERS1
GO Process	GO:0007276	Gamete generation	7	673	0.64	0.0291	SOD1,KIT,KMT2D,PPP2R1A,WT1,SMAD4,MTOR
GO Process	GO:0045652	Regulation of megakaryocyte differentiation	3	82	1.18	0.0293	SETD1A,KMT2D,KMT2A
GO Process	GO:0061053	Somite development	3	82	1.18	0.0293	SHH,PTCH1,SMAD4
GO Process	GO:0009953	Dorsal/ventral pattern formation	3	83	1.18	0.0302	SIX3,SHH,PTCH1
GO Process	GO:0016540	Protein autoprocessing	2	19	1.64	0.0302	HTRA2,SHH
GO Process	GO:0008283	Cell population proliferation	6	493	0.7	0.0304	SIX3,DPH1,KIT,SHH,PTCH1,SMAD4
GO Process	GO:0071363	Cellular response to growth factor stimulus	6	494	0.7	0.0307	HTRA2,PTPN11,SMAD4,SPRED2,TGFBR2,CERS1
GO Process	GO:0050863	Regulation of t cell activation	5	329	0.8	0.0308	SOD1,SHH,PTPN11,TGFBR2,ADA
GO Process	GO:0014033	Neural crest cell differentiation	3	85	1.17	0.0318	SHH,SMAD4,RET
GO Process	GO:0003002	Regionalization	5	332	0.8	0.0319	SIX3,SHH,WT1,PTCH1,SMAD4
GO Process	GO:0001501	Skeletal system development	6	499	0.7	0.0320	KIT,SHH,ANKRD11,PTPN11,TGFBR2,ASXL1
GO Process	GO:0035264	Multicellular organism growth	3	86	1.16	0.0324	ANKRD11,PTPN11,MTOR
GO Process	GO:0046112	Nucleobase biosynthetic process	2	20	1.62	0.0324	MTOR,ADA
GO Process	GO:0048013	Ephrin receptor signaling pathway	3	86	1.16	0.0324	PTPN11,ACTB,PSEN2
GO Process	GO:0007626	Locomotory behavior	4	194	0.93	0.0326	HTRA2,SOD1,SLC18A2,SLC25A46
GO Process	GO:0042445	Hormone metabolic process	4	194	0.93	0.0326	TG,IYD,SHH,PTPN11
GO Process	GO:0006672	Ceramide metabolic process	3	87	1.16	0.0332	HTRA2,PPP2R1A,CERS1
GO Process	GO:0008589	Regulation of smoothened signaling pathway	3	87	1.16	0.0332	CREBBP,SHH,PTCH1
GO Process	GO:0008285	Negative regulation of cell population proliferation	7	696	0.62	0.0335	MFN2,SHH,WT1,PTCH1,SMAD4,NF1,TGFBR2
GO Process	GO:0002521	Leukocyte differentiation	5	338	0.79	0.0336	KIT,SHH,TGFBR2,MTOR,ADA
GO Process	GO:0050673	Epithelial cell proliferation	3	88	1.15	0.0339	KIT,SHH,PTCH1
GO Process	GO:0051149	Positive regulation of muscle cell differentiation	3	88	1.15	0.0339	KIT,SHH,MTOR
GO Process	GO:0060047	Heart contraction	3	88	1.15	0.0339	SOD1,MTOR,DNM1L
GO Process	GO:0060840	Artery development	3	88	1.15	0.0339	NOTCH3,SHH,NF1
GO Process	GO:0030878	Thyroid gland development	2	21	2023-06-01	0.0342	TG,SHH
GO Process	GO:0048839	Inner ear development	4	198	0.92	0.0342	SOD1,SHH,PTPN11,OPA1
GO Process	GO:0110110	Positive regulation of animal organ morphogenesis	3	89	1.15	0.0344	WT1,SMAD4,TGFBR2
GO Process	GO:0036294	Cellular response to decreased oxygen levels	4	199	0.92	0.0345	CREBBP,MTOR,OPA1,DNM1L
GO Process	GO:0098869	Cellular oxidant detoxification	3	90	1.14	0.0353	IYD,SOD1,ALB
GO Process	GO:0022412	Cellular process involved in reproduction in multicellular organism	5	345	0.78	0.0356	KIT,KMT2D,PPP2R1A,WT1,MTOR
GO Process	GO:0051716	Cellular response to stimulus	26	6489	0.22	0.0359	TG,IYD,MFN2,HTRA2,CREBBP,NOTCH3,SOD1,KIT,ALB,SHH,PPP2R1A,WT1,PTCH1,PTPN11,SMAD4,RET,SPRED2,ACTB,NF1,TGFBR2,MTOR,OPA1,PSEN2,KAT6A,DNM1L,CERS1
GO Process	GO:0060021	Roof of mouth development	3	91	1.14	0.0361	SHH,SMAD4,TGFBR2
GO Process	GO:0007169	Transmembrane receptor protein tyrosine kinase signaling pathway	6	518	0.68	0.0363	KIT,PTPN11,RET,SPRED2,ACTB,PSEN2
GO Process	GO:0007530	Sex determination	2	22	1.58	0.0363	WT1,SOX3
GO Process	GO:0061003	Positive regulation of dendritic spine morphogenesis	2	22	1.58	0.0363	OPA1,DNM1L
GO Process	GO:0030155	Regulation of cell adhesion	7	712	0.61	0.0365	SHH,PPP2R1A,PTPN11,RET,NF1,TGFBR2,ADA
GO Process	GO:0048872	Homeostasis of number of cells	4	204	0.91	0.0368	SOD1,KIT,PTPN11,ASXL1
GO Process	GO:0008406	Gonad development	4	205	0.91	0.0374	SOD1,KIT,WT1,SMAD4
GO Process	GO:0002376	Immune system process	14	2481	0.37	0.0380	CDK13,CREBBP,SOD1,KIT,SHH,PTPN11,RET,ACTB,TGFBR2,MTOR,ADA,ASXL1,KAT6A,KMT2A
GO Process	GO:0010817	Regulation of hormone levels	6	524	0.68	0.0380	TG,IYD,SHH,DUOXA2,PTPN11,SMAD4
GO Process	GO:0030539	Male genitalia development	2	23	1.56	0.0387	SHH,WT1
GO Process	GO:0048714	Positive regulation of oligodendrocyte differentiation	2	23	1.56	0.0387	SHH,MTOR
GO Process	GO:0070584	Mitochondrion morphogenesis	2	23	1.56	0.0387	OPA1,DNM1L
GO Process	GO:0050870	Positive regulation of t cell activation	4	209	0.9	0.0394	SHH,PTPN11,TGFBR2,ADA
GO Process	GO:1903426	Regulation of reactive oxygen species biosynthetic process	3	95	2023-12-01	0.0394	SLC18A2,DUOXA2,MTOR
GO Process	GO:0035265	Organ growth	3	96	2023-11-01	0.0404	SHH,PTPN11,TGFBR2
GO Process	GO:0033044	Regulation of chromosome organization	5	359	0.76	0.0405	SETD1A,CDT1,SMAD4,HDAC8,KMT2A
GO Process	GO:0051052	Regulation of dna metabolic process	5	360	0.76	0.0408	CDT1,WT1,HDAC8,KMT2A,CERS1
GO Process	GO:0003181	Atrioventricular valve morphogenesis	2	24	1.54	0.0409	SMAD4,TGFBR2
GO Process	GO:0009612	Response to mechanical stimulus	4	212	0.9	0.0409	KIT,PTCH1,PTPN11,TGFBR2
GO Process	GO:0030325	Adrenal gland development	2	24	1.54	0.0409	WT1,NF1
GO Process	GO:0032925	Regulation of activin receptor signaling pathway	2	24	1.54	0.0409	SHH,LEMD3
GO Process	GO:0042592	Homeostatic process	11	1676	0.44	0.0409	CREBBP,SOD1,KIT,ALB,ANKRD11,PTCH1,PTPN11,SMAD4,ACTB,OPA1,ASXL1
GO Process	GO:0046628	Positive regulation of insulin receptor signaling pathway	2	24	1.54	0.0409	PTPN11,OPA1
GO Process	GO:0048169	Regulation of long-term neuronal synaptic plasticity	2	24	1.54	0.0409	KIT,NF1
GO Process	GO:0062009	Secondary palate development	2	24	1.54	0.0409	SMAD4,TGFBR2
GO Process	GO:0009952	Anterior/posterior pattern specification	4	214	0.89	0.0416	SIX3,SHH,WT1,SMAD4
GO Process	GO:0110020	Regulation of actomyosin structure organization	3	98	2023-11-01	0.0416	SMAD4,MTOR,ALMS1
GO Process	GO:0022612	Gland morphogenesis	3	99	2023-01-01	0.0427	SHH,PTCH1,TGFBR2
GO Process	GO:0002053	Positive regulation of mesenchymal cell proliferation	2	25	1.52	0.0430	SHH,TGFBR2
GO Process	GO:0021697	Cerebellar cortex formation	2	25	1.52	0.0430	PTPN11,SLC25A46
GO Process	GO:0044030	Regulation of dna methylation	2	25	1.52	0.0430	WT1,KMT2A
GO Process	GO:2000147	Positive regulation of cell motility	6	547	0.66	0.0443	KIT,DUOXA2,RET,TGFBR2,MTOR,DNM1L
GO Process	GO:0009408	Response to heat	3	101	2023-09-01	0.0446	HTRA2,SOD1,NF1
GO Process	GO:0030099	Myeloid cell differentiation	4	221	0.88	0.0456	KIT,PTPN11,TGFBR2,KAT6A
GO Process	GO:0051153	Regulation of striated muscle cell differentiation	3	102	2023-09-01	0.0456	SHH,SMAD4,MTOR
GO Process	GO:0044703	Multi-organism reproductive process	8	971	0.54	0.0460	SOD1,KIT,KMT2D,PPP2R1A,WT1,SMAD4,TGFBR2,MTOR
GO Process	GO:0045665	Negative regulation of neuron differentiation	4	222	0.88	0.0460	SIX3,NOTCH3,SHH,SOX3
GO Process	GO:0008593	Regulation of notch signaling pathway	3	103	2023-08-01	0.0462	CREBBP,NOTCH3,KIT
GO Process	GO:0045666	Positive regulation of neuron differentiation	5	377	0.74	0.0472	RET,MTOR,OPA1,TCF4,DNM1L
GO Process	GO:0000188	Inactivation of mapk activity	2	27	1.49	0.0481	PPP2R1A,SPRED2
GO Process	GO:0003148	Outflow tract septum morphogenesis	2	27	1.49	0.0481	SMAD4,TGFBR2
GO Process	GO:0016573	Histone acetylation	3	105	2023-08-01	0.0481	CREBBP,KAT6A,KMT2A
GO Process	GO:0070723	Response to cholesterol	2	27	1.49	0.0481	PTCH1,TGFBR2
GO Process	GO:1902175	Regulation of oxidative stress-induced intrinsic apoptotic signaling pathway	2	27	1.49	0.0481	HTRA2,SOD1
GO Molecular Function
GO Function	GO:0005515	Protein binding	36	7026	0.33	5.12e-05	CDK13,LZTR1,TG,MFN2,HTRA2,SIX3,CREBBP,SETD1A,NOTCH3,SOD1,KIT,ALB,SHH,CDT1,KMT2D,DUOXA2,PPP2R1A,WT1,PTCH1,PTPN11,SMAD4,SPRED2,ACTB,TGFBR2,MTOR,OPA1,DNAJC6,HDAC8,ASXL1,KAT6A,TCF4,KMT2A,CLTCL1,DNM1L,ALMS1,CERS1
GO Function	GO:0008134	Transcription factor binding	11	672	0.83	0.00076	CDK13,SIX3,CREBBP,SETD1A,SMAD4,ACTB,MTOR,HDAC8,ASXL1,KAT6A,TCF4
GO Function	GO:0042800	Histone methyltransferase activity (h3-k4 specific)	3	10	2023-01-02	0.0039	SETD1A,KMT2D,KMT2A
GO Function	GO:0019899	Enzyme binding	16	2239	0.47	0.0326	CDK13,LZTR1,MFN2,SIX3,NOTCH3,SOD1,KIT,CDT1,DUOXA2,PTPN11,SPRED2,ACTB,TGFBR2,MTOR,OPA1,DNM1L
GO Cellular Component
GO Component	GO:0043229	Intracellular organelle	45	12528	0.17	0.00051	CDK13,LZTR1,IYD,MFN2,HTRA2,SIX3,CREBBP,SETD1A,DPH1,NOTCH3,SOD1,KIT,ALB,SHH,SLC18A2,CDT1,ANKRD11,KMT2D,LEMD3,DUOXA2,PPP2R1A,WT1,PTCH1,PTPN11,SMAD4,RET,SLC25A46,SPRED2,ACTB,NF1,MTOR,OPA1,PSEN2,SOX3,DNAJC6,ADA,HDAC8,ASXL1,KAT6A,TCF4,KMT2A,CLTCL1,DNM1L,ALMS1,CERS1
GO Component	GO:0043231	Intracellular membrane-bounded organelle	42	10761	0.21	0.00051	CDK13,LZTR1,IYD,MFN2,HTRA2,SIX3,CREBBP,SETD1A,DPH1,NOTCH3,SOD1,KIT,ALB,SHH,SLC18A2,CDT1,ANKRD11,KMT2D,LEMD3,DUOXA2,PPP2R1A,WT1,PTCH1,PTPN11,SMAD4,SLC25A46,ACTB,NF1,MTOR,OPA1,PSEN2,SOX3,DNAJC6,ADA,HDAC8,ASXL1,KAT6A,TCF4,KMT2A,CLTCL1,DNM1L,CERS1
GO Component	GO:0043227	Membrane-bounded organelle	44	12427	0.17	0.0011	CDK13,LZTR1,IYD,MFN2,HTRA2,SIX3,CREBBP,SETD1A,DPH1,NOTCH3,SOD1,KIT,ALB,SHH,SLC18A2,CDT1,ANKRD11,KMT2D,LEMD3,DUOXA2,PPP2R1A,WT1,PTCH1,PTPN11,SMAD4,RET,SLC25A46,SPRED2,ACTB,NF1,MTOR,OPA1,PSEN2,SOX3,DNAJC6,ADA,HDAC8,ASXL1,KAT6A,TCF4,KMT2A,CLTCL1,DNM1L,CERS1
GO Component	GO:0032991	Protein-containing complex	27	5073	0.35	0.0021	CDK13,LZTR1,HTRA2,SIX3,CREBBP,SETD1A,NOTCH3,SOD1,KIT,ALB,KMT2D,PPP2R1A,PTPN11,SMAD4,RET,ACTB,TGFBR2,MTOR,PSEN2,SOX3,HDAC8,ASXL1,KAT6A,TCF4,KMT2A,CLTCL1,DNM1L
GO Component	GO:0005622	Intracellular	46	14276	0.13	0.0023	CDK13,LZTR1,IYD,MFN2,HTRA2,SIX3,CREBBP,SETD1A,DPH1,NOTCH3,SOD1,KIT,ALB,SHH,SLC18A2,CDT1,ANKRD11,KMT2D,LEMD3,DUOXA2,PPP2R1A,WT1,PTCH1,PTPN11,SMAD4,RET,SLC25A46,SPRED2,ACTB,NF1,TGFBR2,MTOR,OPA1,PSEN2,SOX3,DNAJC6,ADA,HDAC8,ASXL1,KAT6A,TCF4,KMT2A,CLTCL1,DNM1L,ALMS1,CERS1
GO Component	GO:0005829	Cytosol	27	5193	0.34	0.0023	CDK13,MFN2,HTRA2,DPH1,NOTCH3,SOD1,SHH,CDT1,ANKRD11,DUOXA2,PPP2R1A,WT1,PTPN11,SMAD4,SPRED2,ACTB,NF1,TGFBR2,MTOR,OPA1,DNAJC6,ADA,KAT6A,KMT2A,CLTCL1,DNM1L,ALMS1
GO Component	GO:0030425	Dendrite	9	612	0.79	0.0023	SOD1,PPP2R1A,PTCH1,RET,NF1,MTOR,OPA1,PSEN2,ADA
GO Component	GO:0070013	Intracellular organelle lumen	29	5857	0.31	0.0023	CDK13,IYD,HTRA2,SIX3,CREBBP,SETD1A,DPH1,NOTCH3,SOD1,KIT,ALB,SHH,CDT1,ANKRD11,KMT2D,WT1,PTPN11,SMAD4,ACTB,NF1,MTOR,OPA1,SOX3,ADA,HDAC8,ASXL1,KAT6A,TCF4,KMT2A
GO Component	GO:0031981	Nuclear lumen	25	4733	0.34	0.0024	CDK13,IYD,SIX3,CREBBP,SETD1A,DPH1,NOTCH3,SOD1,KIT,CDT1,ANKRD11,KMT2D,WT1,PTPN11,SMAD4,ACTB,NF1,MTOR,OPA1,SOX3,HDAC8,ASXL1,KAT6A,TCF4,KMT2A
GO Component	GO:0005694	Chromosome	14	1712	0.53	0.0041	CDK13,HTRA2,SIX3,CREBBP,SETD1A,CDT1,PPP2R1A,SMAD4,ACTB,PSEN2,SOX3,HDAC8,KAT6A,TCF4
GO Component	GO:0098805	Whole membrane	14	1715	0.53	0.0041	LZTR1,MFN2,SHH,SLC18A2,PTCH1,RET,SLC25A46,SPRED2,TGFBR2,MTOR,OPA1,PSEN2,CLTCL1,DNM1L
GO Component	GO:0005634	Nucleus	31	7390	0.24	0.0091	CDK13,IYD,HTRA2,SIX3,CREBBP,SETD1A,DPH1,NOTCH3,SOD1,KIT,ALB,CDT1,ANKRD11,KMT2D,LEMD3,PPP2R1A,WT1,PTCH1,PTPN11,SMAD4,ACTB,NF1,MTOR,OPA1,PSEN2,SOX3,HDAC8,ASXL1,KAT6A,TCF4,KMT2A
GO Component	GO:0005741	Mitochondrial outer membrane	5	194	2023-03-01	0.0107	MFN2,SLC25A46,MTOR,OPA1,DNM1L
GO Component	GO:0043232	Intracellular non-membrane-bounded organelle	24	4880	0.31	0.0107	CDK13,MFN2,HTRA2,SIX3,CREBBP,SETD1A,NOTCH3,KIT,SLC18A2,CDT1,PPP2R1A,WT1,SMAD4,ACTB,NF1,OPA1,PSEN2,SOX3,HDAC8,KAT6A,TCF4,CLTCL1,DNM1L,ALMS1
GO Component	GO:0005654	Nucleoplasm	21	3973	0.34	0.0122	CDK13,IYD,CREBBP,SETD1A,DPH1,NOTCH3,SOD1,CDT1,ANKRD11,KMT2D,WT1,PTPN11,SMAD4,ACTB,MTOR,OPA1,SOX3,HDAC8,ASXL1,KAT6A,KMT2A
GO Component	GO:0030424	Axon	8	646	0.71	0.0122	SOD1,SLC18A2,PTCH1,RET,ACTB,NF1,OPA1,PSEN2
GO Component	GO:1902494	Catalytic complex	11	1328	0.54	0.0173	CDK13,LZTR1,HTRA2,CREBBP,SETD1A,KMT2D,PPP2R1A,ACTB,HDAC8,KAT6A,KMT2A
GO Component	GO:0005737	Cytoplasm	39	11428	0.15	0.0199	CDK13,LZTR1,IYD,MFN2,HTRA2,CREBBP,DPH1,NOTCH3,SOD1,KIT,ALB,SHH,SLC18A2,CDT1,ANKRD11,DUOXA2,PPP2R1A,WT1,PTCH1,PTPN11,SMAD4,RET,SLC25A46,SPRED2,ACTB,NF1,TGFBR2,MTOR,OPA1,PSEN2,DNAJC6,ADA,HDAC8,KAT6A,KMT2A,CLTCL1,DNM1L,ALMS1,CERS1
GO Component	GO:0031410	Cytoplasmic vesicle	15	2386	0.42	0.0202	CDK13,LZTR1,IYD,SOD1,KIT,ALB,SLC18A2,PTCH1,RET,SPRED2,OPA1,PSEN2,ADA,CLTCL1,DNM1L
GO Component	GO:0043005	Neuron projection	11	1366	0.53	0.0202	SOD1,SLC18A2,PPP2R1A,PTCH1,RET,ACTB,NF1,MTOR,OPA1,PSEN2,ADA
GO Component	GO:1990234	Transferase complex	8	752	0.65	0.0228	CDK13,LZTR1,CREBBP,SETD1A,KMT2D,ACTB,KAT6A,KMT2A
GO Component	GO:0005740	Mitochondrial envelope	8	766	0.64	0.0250	MFN2,HTRA2,SOD1,SLC25A46,MTOR,OPA1,PSEN2,DNM1L
GO Component	GO:0000785	Chromatin	10	1220	0.53	0.0296	CDK13,HTRA2,SIX3,CREBBP,SETD1A,SMAD4,ACTB,SOX3,KAT6A,TCF4
GO Component	GO:0000228	Nuclear chromosome	10	1256	0.52	0.0359	CDK13,SIX3,CREBBP,SETD1A,SMAD4,ACTB,SOX3,HDAC8,KAT6A,TCF4
GO Component	GO:0000790	Nuclear chromatin	9	1048	0.55	0.0395	CDK13,SIX3,CREBBP,SETD1A,SMAD4,ACTB,SOX3,KAT6A,TCF4
GO Component	GO:0035097	Histone methyltransferase complex	3	74	1.23	0.0404	SETD1A,KMT2D,KMT2A
GO Component	GO:0031090	Organelle membrane	18	3548	0.32	0.0442	LZTR1,IYD,MFN2,HTRA2,NOTCH3,SLC18A2,LEMD3,DUOXA2,PTCH1,RET,SLC25A46,SPRED2,MTOR,OPA1,PSEN2,CLTCL1,DNM1L,CERS1
GO Component	GO:0000123	Histone acetyltransferase complex	3	83	1.18	0.0493	CREBBP,ACTB,KAT6A
GO Component	GO:0005758	Mitochondrial intermembrane space	3	81	1.19	0.0493	HTRA2,SOD1,OPA1
GO Component	GO:0045121	Membrane raft	5	324	0.81	0.0493	SHH,PTCH1,RET,TGFBR2,PSEN2
GO Component	GO:0098588	Bounding membrane of organelle	13	2107	0.41	0.0493	LZTR1,MFN2,NOTCH3,SLC18A2,PTCH1,RET,SLC25A46,SPRED2,MTOR,OPA1,PSEN2,CLTCL1,DNM1L
Reactome
Reactome	HSA-5663202	Diseases of signal transduction by growth factor receptors and second messengers	13	392	1.14	1.66e-08	CREBBP,KIT,SHH,PPP2R1A,PTPN11,SMAD4,SPRED2,ACTB,NF1,TGFBR2,MTOR,PSEN2,HDAC8
Reactome	HSA-212436	Generic Transcription Pathway	13	1197	0.66	0.0019	CDK13,CREBBP,SETD1A,NOTCH3,KIT,KMT2D,PPP2R1A,PTPN11,SMAD4,MTOR,HDAC8,KAT6A,KMT2A
Reactome	HSA-3247509	Chromatin modifying enzymes	7	237	2023-09-01	0.0019	CREBBP,SETD1A,KMT2D,ACTB,HDAC8,KAT6A,KMT2A
Reactome	HSA-5684996	MAPK1/MAPK3 signaling	7	280	2023-02-01	0.0022	KIT,PPP2R1A,PTPN11,RET,SPRED2,ACTB,NF1
Reactome	HSA-74160	Gene expression (Transcription)	14	1455	0.6	0.0022	CDK13,CREBBP,SETD1A,NOTCH3,KIT,KMT2D,PPP2R1A,PTPN11,SMAD4,ACTB,MTOR,HDAC8,KAT6A,KMT2A
Reactome	HSA-1643685	Disease	14	1548	0.58	0.0030	CREBBP,NOTCH3,KIT,SHH,PPP2R1A,PTPN11,SMAD4,SPRED2,ACTB,NF1,TGFBR2,MTOR,PSEN2,HDAC8
Reactome	HSA-162582	Signal Transduction	18	2741	0.44	0.0073	CREBBP,NOTCH3,KIT,SHH,KMT2D,PPP2R1A,PTCH1,PTPN11,SMAD4,RET,SPRED2,ACTB,NF1,TGFBR2,MTOR,PSEN2,SOX3,HDAC8
Reactome	HSA-1266738	Developmental Biology	11	1087	0.62	0.0086	CREBBP,KMT2D,WT1,PTPN11,SMAD4,RET,ACTB,PSEN2,TCF4,KMT2A,CLTCL1
Reactome	HSA-350054	Notch-HLH transcription pathway	3	28	1.65	0.0095	CREBBP,NOTCH3,HDAC8
Reactome	HSA-5673001	RAF/MAP kinase cascade	6	274	0.96	0.0095	KIT,PPP2R1A,RET,SPRED2,ACTB,NF1
Reactome	HSA-8878171	Transcriptional regulation by RUNX1	5	204	2023-01-01	0.0217	CREBBP,SETD1A,KMT2D,PTPN11,KMT2A
Reactome	HSA-3214841	PKMTs methylate histone lysines	3	47	1.42	0.0282	SETD1A,KMT2D,KMT2A
Reactome	HSA-3304349	Loss of Function of SMAD2/3 in Cancer	2	7	2023-08-02	0.0282	SMAD4,TGFBR2
Reactome	HSA-6802953	RAS signaling downstream of NF1 loss-of-function variants	2	7	2023-08-02	0.0282	SPRED2,NF1
Reactome	HSA-9006934	Signaling by Receptor Tyrosine Kinases	7	502	0.76	0.0282	KIT,PPP2R1A,PTPN11,SPRED2,ACTB,MTOR,PSEN2
Reactome	HSA-3928665	EPH-ephrin mediated repulsion of cells	3	51	1.39	0.0286	ACTB,PSEN2,CLTCL1
Reactome	HSA-5632681	Ligand-receptor interactions	2	8	2023-02-02	0.0286	SHH,PTCH1
Reactome	HSA-5654736	Signaling by FGFR1	3	50	2023-04-01	0.0286	PPP2R1A,PTPN11,SPRED2
Reactome	HSA-9012852	Signaling by NOTCH3	3	49	1.41	0.0286	CREBBP,NOTCH3,PSEN2
Reactome	HSA-9017802	Noncanonical activation of NOTCH3	2	8	2023-02-02	0.0286	NOTCH3,PSEN2
Reactome	HSA-196025	Formation of annular gap junctions	2	11	1.88	0.0366	ACTB,CLTCL1
Reactome	HSA-2644606	Constitutive Signaling by NOTCH1 PEST Domain Mutants	3	58	1.33	0.0366	CREBBP,PSEN2,HDAC8
Reactome	HSA-2894862	Constitutive Signaling by NOTCH1 HD+PEST Domain Mutants	3	58	1.33	0.0366	CREBBP,PSEN2,HDAC8
Reactome	HSA-388841	Costimulation by the CD28 family	3	65	1.28	0.0393	PPP2R1A,PTPN11,MTOR
Reactome	HSA-8936459	RUNX1 regulates genes involved in megakaryocyte differentiation and platelet function	3	66	1.28	0.0398	SETD1A,KMT2D,KMT2A

## Sheet: Enrichment subnetwork2 cluster4
#category	term ID	term description	observed gene count	background gene count	strength	false discovery rate	matching proteins in your network (labels)
GO Biological Process
GO Process	GO:0006399	tRNA metabolic process	16	184	1.82	4.72e-22	MTFMT,WARS2,CARS2,TRMT5,NARS2,FARS2,YARS2,TRIT1,EXOSC3,KARS,ELAC2,RARS2,IARS,AIMP1,TRMT1,SARS2
GO Process	GO:0006418	tRNA aminoacylation for protein translation	10	46	2.21	3.96e-16	WARS2,CARS2,NARS2,FARS2,YARS2,KARS,RARS2,IARS,AIMP1,SARS2
GO Process	GO:0010467	Gene expression	22	2056	0.91	6.93e-15	MTFMT,WARS2,C12orf65,CARS2,TRMT5,NARS2,TSFM,FARS2,YARS2,TRIT1,EXOSC3,KARS,ELAC2,RARS2,POLR1C,IARS,AIMP1,EFTUD2,PNPT1,GFM1,TRMT1,SARS2
GO Process	GO:0006412	Translation	14	366	1.46	1.21e-14	MTFMT,WARS2,C12orf65,CARS2,NARS2,TSFM,FARS2,YARS2,KARS,RARS2,IARS,AIMP1,GFM1,SARS2
GO Process	GO:0043604	Amide biosynthetic process	15	512	1.34	2.17e-14	ASNS,MTFMT,WARS2,C12orf65,CARS2,NARS2,TSFM,FARS2,YARS2,KARS,RARS2,IARS,AIMP1,GFM1,SARS2
GO Process	GO:0016070	RNA metabolic process	19	1584	0.96	8.79e-13	MTFMT,WARS2,CARS2,TRMT5,NARS2,FARS2,YARS2,TRIT1,EXOSC3,KARS,ELAC2,RARS2,POLR1C,IARS,AIMP1,EFTUD2,PNPT1,TRMT1,SARS2
GO Process	GO:0034641	Cellular nitrogen compound metabolic process	23	3282	0.72	2.58e-12	ASNS,MTFMT,WARS2,C12orf65,CARS2,TRMT5,NARS2,TSFM,FARS2,YARS2,TRIT1,EXOSC3,KARS,ELAC2,RARS2,POLR1C,IARS,AIMP1,EFTUD2,PNPT1,GFM1,TRMT1,SARS2
GO Process	GO:0140053	Mitochondrial gene expression	10	143	1.72	2.95e-12	WARS2,TRMT5,TSFM,YARS2,TRIT1,ELAC2,RARS2,PNPT1,GFM1,SARS2
GO Process	GO:0006520	Cellular amino acid metabolic process	11	278	1.47	3.24e-11	ASNS,WARS2,CARS2,NARS2,FARS2,YARS2,KARS,RARS2,IARS,AIMP1,SARS2
GO Process	GO:0000959	Mitochondrial rna metabolic process	7	41	2023-11-02	1.71e-10	WARS2,TRMT5,YARS2,TRIT1,ELAC2,PNPT1,SARS2
GO Process	GO:0044271	Cellular nitrogen compound biosynthetic process	16	1522	0.9	3.43e-09	ASNS,MTFMT,WARS2,C12orf65,CARS2,NARS2,TSFM,FARS2,YARS2,KARS,RARS2,POLR1C,IARS,AIMP1,GFM1,SARS2
GO Process	GO:1901566	Organonitrogen compound biosynthetic process	15	1346	0.92	9.40e-09	ASNS,MTFMT,WARS2,C12orf65,CARS2,NARS2,TSFM,FARS2,YARS2,KARS,RARS2,IARS,AIMP1,GFM1,SARS2
GO Process	GO:0034645	Cellular macromolecule biosynthetic process	15	1592	0.85	8.54e-08	MTFMT,WARS2,C12orf65,CARS2,NARS2,TSFM,FARS2,YARS2,KARS,RARS2,POLR1C,IARS,AIMP1,GFM1,SARS2
GO Process	GO:0008033	tRNA processing	7	128	1.61	1.84e-07	MTFMT,TRMT5,FARS2,TRIT1,KARS,ELAC2,TRMT1
GO Process	GO:0006807	Nitrogen compound metabolic process	24	6852	0.42	8.10e-07	ASNS,MTFMT,WARS2,C12orf65,CARS2,TRMT5,NARS2,TSFM,FARS2,YARS2,TRIT1,EXOSC3,KARS,ELAC2,FBXL4,RARS2,POLR1C,IARS,AIMP1,EFTUD2,PNPT1,GFM1,TRMT1,SARS2
GO Process	GO:0043170	Macromolecule metabolic process	23	6137	0.45	1.10e-06	MTFMT,WARS2,C12orf65,CARS2,TRMT5,NARS2,TSFM,FARS2,YARS2,TRIT1,EXOSC3,KARS,ELAC2,FBXL4,RARS2,POLR1C,IARS,AIMP1,EFTUD2,PNPT1,GFM1,TRMT1,SARS2
GO Process	GO:0044238	Primary metabolic process	24	7332	0.39	3.43e-06	ASNS,MTFMT,WARS2,C12orf65,CARS2,TRMT5,NARS2,TSFM,FARS2,YARS2,TRIT1,EXOSC3,KARS,ELAC2,FBXL4,RARS2,POLR1C,IARS,AIMP1,EFTUD2,PNPT1,GFM1,TRMT1,SARS2
GO Process	GO:0032543	Mitochondrial translation	6	114	2023-06-01	4.02e-06	WARS2,TSFM,YARS2,RARS2,GFM1,SARS2
GO Process	GO:0000963	Mitochondrial rna processing	4	17	2.25	5.51e-06	TRMT5,TRIT1,ELAC2,PNPT1
GO Process	GO:0044237	Cellular metabolic process	24	7513	0.38	5.51e-06	ASNS,MTFMT,WARS2,C12orf65,CARS2,TRMT5,NARS2,TSFM,FARS2,YARS2,TRIT1,EXOSC3,KARS,ELAC2,FBXL4,RARS2,POLR1C,IARS,AIMP1,EFTUD2,PNPT1,GFM1,TRMT1,SARS2
GO Process	GO:0034470	ncRNA processing	8	381	2023-02-01	8.92e-06	MTFMT,TRMT5,FARS2,TRIT1,EXOSC3,KARS,ELAC2,TRMT1
GO Process	GO:0071704	Organic substance metabolic process	24	7755	0.37	9.63e-06	ASNS,MTFMT,WARS2,C12orf65,CARS2,TRMT5,NARS2,TSFM,FARS2,YARS2,TRIT1,EXOSC3,KARS,ELAC2,FBXL4,RARS2,POLR1C,IARS,AIMP1,EFTUD2,PNPT1,GFM1,TRMT1,SARS2
GO Process	GO:1901576	Organic substance biosynthetic process	16	2734	0.64	9.63e-06	ASNS,MTFMT,WARS2,C12orf65,CARS2,NARS2,TSFM,FARS2,YARS2,KARS,RARS2,POLR1C,IARS,AIMP1,GFM1,SARS2
GO Process	GO:0044260	Cellular macromolecule metabolic process	20	4976	0.48	1.80e-05	MTFMT,WARS2,C12orf65,CARS2,TRMT5,NARS2,TSFM,FARS2,YARS2,EXOSC3,KARS,FBXL4,RARS2,POLR1C,IARS,AIMP1,PNPT1,GFM1,TRMT1,SARS2
GO Process	GO:0006396	RNA processing	10	854	0.95	2.25e-05	MTFMT,TRMT5,FARS2,TRIT1,EXOSC3,KARS,ELAC2,EFTUD2,PNPT1,TRMT1
GO Process	GO:0070127	tRNA aminoacylation for mitochondrial protein translation	3	9	2023-04-02	0.00013	WARS2,YARS2,SARS2
GO Process	GO:0090646	Mitochondrial trna processing	3	13	2.24	0.00033	TRMT5,TRIT1,ELAC2
GO Process	GO:0006400	tRNA modification	4	88	1.53	0.0017	MTFMT,TRMT5,TRIT1,TRMT1
GO Process	GO:0044267	Cellular protein metabolic process	15	3696	0.48	0.0035	MTFMT,WARS2,C12orf65,CARS2,NARS2,TSFM,FARS2,YARS2,KARS,FBXL4,RARS2,IARS,AIMP1,GFM1,SARS2
GO Process	GO:0043633	Polyadenylation-dependent rna catabolic process	2	8	2.27	0.0191	EXOSC3,PNPT1
GO Process	GO:0070900	Mitochondrial trna modification	2	9	2.22	0.0228	TRMT5,TRIT1
GO Molecular Function
GO Function	GO:0140101	Catalytic activity, acting on a trna	14	120	1.94	7.11e-21	MTFMT,WARS2,CARS2,TRMT5,NARS2,FARS2,YARS2,TRIT1,KARS,ELAC2,RARS2,IARS,TRMT1,SARS2
GO Function	GO:0140098	Catalytic activity, acting on rna	17	375	1.53	4.01e-20	MTFMT,WARS2,CARS2,TRMT5,NARS2,FARS2,YARS2,TRIT1,EXOSC3,KARS,ELAC2,RARS2,POLR1C,IARS,PNPT1,TRMT1,SARS2
GO Function	GO:0004812	aminoacyl-tRNA ligase activity	9	42	2.21	8.48e-15	WARS2,CARS2,NARS2,FARS2,YARS2,KARS,RARS2,IARS,SARS2
GO Function	GO:0016874	Ligase activity	10	156	1.68	4.44e-12	ASNS,WARS2,CARS2,NARS2,FARS2,YARS2,KARS,RARS2,IARS,SARS2
GO Function	GO:0000049	tRNA binding	7	63	1.92	1.84e-09	FARS2,YARS2,KARS,IARS,AIMP1,TRMT1,SARS2
GO Function	GO:0003723	RNA binding	15	1649	0.84	1.18e-07	C12orf65,TSFM,FARS2,YARS2,EXOSC3,KARS,ELAC2,RARS2,IARS,AIMP1,EFTUD2,PNPT1,GFM1,TRMT1,SARS2
GO Function	GO:0035639	Purine ribonucleoside triphosphate binding	14	1799	0.77	4.31e-06	ASNS,WARS2,CARS2,NARS2,FARS2,YARS2,TRIT1,KARS,RARS2,IARS,BBS10,EFTUD2,GFM1,SARS2
GO Function	GO:1901363	Heterocyclic compound binding	22	5831	0.45	4.31e-06	ASNS,WARS2,C12orf65,CARS2,NARS2,TSFM,FARS2,YARS2,TRIT1,EXOSC3,KARS,ELAC2,RARS2,POLR1C,IARS,BBS10,AIMP1,EFTUD2,PNPT1,GFM1,TRMT1,SARS2
GO Function	GO:0097159	Organic cyclic compound binding	22	5916	0.45	4.73e-06	ASNS,WARS2,C12orf65,CARS2,NARS2,TSFM,FARS2,YARS2,TRIT1,EXOSC3,KARS,ELAC2,RARS2,POLR1C,IARS,BBS10,AIMP1,EFTUD2,PNPT1,GFM1,TRMT1,SARS2
GO Function	GO:0032555	Purine ribonucleotide binding	14	1864	0.75	4.94e-06	ASNS,WARS2,CARS2,NARS2,FARS2,YARS2,TRIT1,KARS,RARS2,IARS,BBS10,EFTUD2,GFM1,SARS2
GO Function	GO:0003676	Nucleic acid binding	18	3947	0.54	1.98e-05	C12orf65,NARS2,TSFM,FARS2,YARS2,TRIT1,EXOSC3,KARS,ELAC2,RARS2,POLR1C,IARS,AIMP1,EFTUD2,PNPT1,GFM1,TRMT1,SARS2
GO Function	GO:0005524	ATP binding	12	1464	0.79	2.17e-05	ASNS,WARS2,CARS2,NARS2,FARS2,YARS2,TRIT1,KARS,RARS2,IARS,BBS10,SARS2
GO Function	GO:0003824	Catalytic activity	20	5486	0.44	5.10e-05	ASNS,MTFMT,WARS2,CARS2,TRMT5,NARS2,FARS2,YARS2,TRIT1,EXOSC3,KARS,ELAC2,RARS2,POLR1C,IARS,EFTUD2,PNPT1,GFM1,TRMT1,SARS2
GO Function	GO:0016423	tRNA (guanine) methyltransferase activity	2	12	2023-01-02	0.0206	TRMT5,TRMT1
GO Function	GO:0008135	Translation factor activity, rna binding	3	82	1.44	0.0247	C12orf65,TSFM,GFM1
GO Function	GO:0003746	Translation elongation factor activity	2	18	1.92	0.0395	TSFM,GFM1
GO Cellular Component
GO Component	GO:0005759	Mitochondrial matrix	15	479	1.37	8.73e-15	WARS2,C12orf65,CARS2,TRMT5,NARS2,TSFM,FARS2,YARS2,TRIT1,KARS,ELAC2,RARS2,PNPT1,GFM1,SARS2
GO Component	GO:0005739	Mitochondrion	17	1611	0.9	5.10e-10	MTFMT,WARS2,C12orf65,CARS2,TRMT5,NARS2,TSFM,FARS2,YARS2,TRIT1,KARS,ELAC2,FBXL4,RARS2,PNPT1,GFM1,SARS2
GO Component	GO:0017101	aminoacyl-tRNA synthetase multienzyme complex	3	11	2.31	0.00042	KARS,IARS,AIMP1
GO Component	GO:0070013	Intracellular organelle lumen	20	5857	0.41	0.00045	WARS2,C12orf65,CARS2,TRMT5,NARS2,TSFM,FARS2,YARS2,TRIT1,EXOSC3,KARS,ELAC2,FBXL4,RARS2,POLR1C,EFTUD2,PNPT1,GFM1,TRMT1,SARS2
GO Component	GO:0005737	Cytoplasm	24	11428	0.2	0.0382	ASNS,MTFMT,WARS2,C12orf65,CARS2,TRMT5,NARS2,TSFM,FARS2,YARS2,TRIT1,EXOSC3,KARS,ELAC2,SLC6A9,FBXL4,RARS2,POLR1C,IARS,AIMP1,EFTUD2,PNPT1,GFM1,SARS2
GO Component	GO:0000177	Cytoplasmic exosome (rnase complex)	2	14	2023-03-02	0.0427	EXOSC3,PNPT1
Reactome
Reactome	HSA-379724	tRNA Aminoacylation	10	42	2.25	7.72e-17	WARS2,CARS2,NARS2,FARS2,YARS2,KARS,RARS2,IARS,AIMP1,SARS2
Reactome	HSA-379726	Mitochondrial tRNA aminoacylation	8	21	2.46	1.33e-14	WARS2,CARS2,NARS2,FARS2,YARS2,KARS,RARS2,SARS2
Reactome	HSA-72766	Translation	13	289	1.53	1.35e-14	MTFMT,WARS2,CARS2,NARS2,TSFM,FARS2,YARS2,KARS,RARS2,IARS,AIMP1,GFM1,SARS2
Reactome	HSA-392499	Metabolism of proteins	16	1977	0.78	1.33e-07	ASNS,MTFMT,WARS2,CARS2,NARS2,TSFM,FARS2,YARS2,EXOSC3,KARS,FBXL4,RARS2,IARS,AIMP1,GFM1,SARS2
Reactome	HSA-379716	Cytosolic tRNA aminoacylation	3	24	1.97	0.0026	KARS,IARS,AIMP1
Reactome	HSA-72306	tRNA processing	4	108	1.45	0.0050	TRMT5,TRIT1,ELAC2,TRMT1
Reactome	HSA-6782315	tRNA modification in the nucleus and cytosol	3	43	1.72	0.0094	TRMT5,TRIT1,TRMT1

## Sheet: Enrichment subnetwork3 cluster4
#category	term ID	term description	observed gene count	background gene count	strength	false discovery rate	matching proteins in your network (labels)
GO Biological Process
GO Process	GO:0033108	Mitochondrial respiratory chain complex assembly	10	102	1.98	5.61e-14	TTC19,NDUFA9,NUBPL,NDUFS4,NDUFAF3,SURF1,NDUFAF5,COX20,BCS1L,SCO2
GO Process	GO:0007005	Mitochondrion organization	11	452	1.38	1.02e-09	TTC19,NDUFA9,NUBPL,NDUFS4,NDUFAF3,SURF1,NDUFAF5,TYMP,COX20,BCS1L,SCO2
GO Process	GO:0032981	Mitochondrial respiratory chain complex i assembly	6	66	1.95	3.18e-07	NDUFA9,NUBPL,NDUFS4,NDUFAF3,NDUFAF5,BCS1L
GO Process	GO:0017004	Cytochrome complex assembly	5	37	2023-12-02	1.38e-06	TTC19,SURF1,COX20,BCS1L,SCO2
GO Process	GO:0033617	Mitochondrial cytochrome c oxidase assembly	4	22	2.25	2.14e-05	SURF1,COX20,BCS1L,SCO2
GO Process	GO:0055114	Oxidation-reduction process	9	939	0.97	0.00021	TTC19,NDUFA9,ETHE1,NDUFS4,SURF1,SDHB,NDUFAF5,SUOX,SCO2
GO Process	GO:0022607	Cellular component assembly	12	2359	0.7	0.00055	TTC19,NDUFA9,NUBPL,NDUFS4,NDUFAF3,IBA57,SURF1,NDUFAF5,NFU1,COX20,BCS1L,SCO2
GO Process	GO:0045333	Cellular respiration	5	158	1.49	0.00056	NDUFA9,NDUFS4,SURF1,SDHB,SCO2
GO Process	GO:0022900	Electron transport chain	5	174	1.45	0.00081	NDUFA9,NDUFS4,SURF1,SDHB,SCO2
GO Process	GO:0006790	Sulfur compound metabolic process	6	355	1.22	0.0010	LIAS,NUBPL,ETHE1,IBA57,SUOX,NFU1
GO Process	GO:0016226	Iron-sulfur cluster assembly	3	23	2023-11-02	0.0018	NUBPL,IBA57,NFU1
GO Process	GO:0022904	Respiratory electron transport chain	4	107	1.56	0.0028	NDUFA9,NDUFS4,SDHB,SCO2
GO Process	GO:0070221	Sulfide oxidation, using sulfide:quinone oxidoreductase	2	6	2.51	0.0169	ETHE1,SUOX
GO Process	GO:0034551	Mitochondrial respiratory chain complex iii assembly	2	10	2.29	0.0348	TTC19,BCS1L
GO Molecular Function
GO Function	GO:0051539	4 iron, 4 sulfur cluster binding	4	42	1.97	0.00041	LIAS,NUBPL,SDHB,NFU1
GO Function	GO:0016491	Oxidoreductase activity	8	726	2023-03-01	0.00051	NDUFA9,ETHE1,NDUFS4,SURF1,SDHB,NDUFAF5,SUOX,SCO2
GO Cellular Component
GO Component	GO:0005739	Mitochondrion	16	1611	0.99	2.86e-11	LIAS,TTC19,NDUFA9,NUBPL,ETHE1,NDUFS4,NDUFAF3,IBA57,SURF1,SDHB,NDUFAF5,SUOX,NFU1,COX20,BCS1L,SCO2
GO Component	GO:0005743	Mitochondrial inner membrane	10	480	1.31	1.10e-08	TTC19,NDUFA9,NDUFS4,NDUFAF3,SURF1,SDHB,NDUFAF5,COX20,BCS1L,SCO2
GO Component	GO:0005740	Mitochondrial envelope	11	766	1.15	2.33e-08	TTC19,NDUFA9,NDUFS4,NDUFAF3,SURF1,SDHB,NDUFAF5,SUOX,COX20,BCS1L,SCO2
GO Component	GO:0070469	Respirasome	6	95	1.79	2.01e-07	TTC19,NDUFA9,NDUFS4,SURF1,SDHB,BCS1L
GO Component	GO:0005746	Mitochondrial respirasome	5	84	1.77	4.80e-06	NDUFA9,NDUFS4,SURF1,SDHB,BCS1L
GO Component	GO:0005759	Mitochondrial matrix	7	479	1.16	5.52e-05	LIAS,NDUFA9,NUBPL,ETHE1,IBA57,SUOX,SCO2
GO Component	GO:0098803	Respiratory chain complex	4	80	1.69	0.00022	NDUFA9,NDUFS4,SDHB,BCS1L
GO Component	GO:1990204	Oxidoreductase complex	4	107	1.56	0.00062	NDUFA9,NDUFS4,SDHB,BCS1L
GO Component	GO:0098800	Inner mitochondrial membrane protein complex	4	131	1.48	0.0013	NDUFA9,NDUFS4,SDHB,BCS1L
GO Component	GO:0043231	Intracellular membrane-bounded organelle	19	10761	0.24	0.0136	LIAS,TTC19,NDUFA9,NUBPL,ETHE1,NDUFS4,NDUFAF3,ZBTB18,IBA57,RIPPLY2,SURF1,SDHB,NDUFAF5,SUOX,NFU1,ZNF142,COX20,BCS1L,SCO2
Reactome
Reactome	HSA-611105	Respiratory electron transport	9	101	1.94	1.38e-12	NDUFA9,NUBPL,NDUFS4,NDUFAF3,SURF1,SDHB,NDUFAF5,COX20,SCO2
Reactome	HSA-6799198	Complex I biogenesis	5	55	1.95	1.85e-06	NDUFA9,NUBPL,NDUFS4,NDUFAF3,NDUFAF5
Reactome	HSA-1430728	Metabolism	13	2089	0.78	3.94e-06	LIAS,NDUFA9,NUBPL,ETHE1,NDUFS4,NDUFAF3,SURF1,SDHB,NDUFAF5,SUOX,TYMP,COX20,SCO2
Reactome	HSA-1614517	Sulfide oxidation to sulfate	2	6	2.51	0.0100	ETHE1,SUOX
Reactome	HSA-5628897	TP53 Regulates Metabolic Genes	3	87	1.53	0.0314	SURF1,COX20,SCO2

## Sheet: MCL clusters shared clust 4&14
#clustering method	cluster number	cluster color	gene count	protein name	protein description
MCL	1	Red	36	ABCA4	Atp-binding cassette, subfamily a (abc1), member 4; Retinal-specific ATP-binding cassette transporter; In the visual cycle, acts as an inward-directed retinoid flipase, retinoid substrates imported by ABCA4 from the extracellular or intradiscal (rod) membrane surfaces to the cytoplasmic membrane surface are all-trans-retinaldehyde (ATR) and N-retinyl-phosphatidyl-ethanolamine (NR-PE). Once transp…
MCL	1	Red	36	AHI1	Abelson helper integration site 1; Jouberin; Involved in vesicle trafficking and required for ciliogenesis, formation of primary non-motile cilium, and recruitment of RAB8A to the basal body of primary cilium. Component of the tectonic-like complex, a complex localized at the transition zone of primary cilia and acting as a barrier that prevents diffusion of transmembrane proteins between the cil…
MCL	1	Red	36	BBS1	Bardet-Biedl syndrome 1 protein; The BBSome complex is thought to function as a coat complex required for sorting of specific membrane proteins to the primary cilia. The BBSome complex is required for ciliogenesis but is dispensable for centriolar satellite function. This ciliogenic function is mediated in part by the Rab8 GDP/GTP exchange factor, which localizes to the basal body and contacts th…
MCL	1	Red	36	BBS7	Bardet-Biedl syndrome 7 protein; The BBSome complex is thought to function as a coat complex required for sorting of specific membrane proteins to the primary cilia. The BBSome complex is required for ciliogenesis but is dispensable for centriolar satellite function. This ciliogenic function is mediated in part by the Rab8 GDP/GTP exchange factor, which localizes to the basal body and contacts th…
MCL	1	Red	36	BEST1	Bestrophin-1; Forms calcium-sensitive chloride channels. Highly permeable to bicarbonate; Bestrophins
MCL	1	Red	36	BSND	Barttin (chloride channel ka/b beta subunit); Barttin; Functions as a beta-subunit for CLCNKA and CLCNKB chloride channels. In the kidney CLCNK/BSND heteromers mediate chloride reabsorption by facilitating its basolateral efflux. In the stria, CLCNK/BSND channels drive potassium secretion by recycling chloride for the basolateral SLC12A2 cotransporter
MCL	1	Red	36	C5orf42	Protein JBTS17; Involved in ciliogenesis. Involved in the establishment of cell polarity required for directional cell migration. Proposed to act in association with the CPLANE (ciliogenesis and planar polarity effectors) complex. Involved in recruitment of peripheral IFT-A proteins to basal bodies (By similarity)
MCL	1	Red	36	CDH23	Cadherin related 23; Cadherin-23; Cadherins are calcium-dependent cell adhesion proteins. They preferentially interact with themselves in a homophilic manner in connecting cells. CDH23 is required for establishing and/or maintaining the proper organization of the stereocilia bundle of hair cells in the cochlea and the vestibule during late embryonic/early postnatal development. It is part of the …
MCL	1	Red	36	CEP290	Centrosomal protein of 290 kDa; Involved in early and late steps in cilia formation. Its association with CCP110 is required for inhibition of primary cilia formation by CCP110. May play a role in early ciliogenesis in the disappearance of centriolar satellites and in the transition of primary ciliar vesicles (PCVs) to capped ciliary vesicles (CCVs). Required for the centrosomal recruitment of RA…
MCL	1	Red	36	CNGB1	Cyclic nucleotide-gated cation channel beta-1; Subunit of cyclic nucleotide-gated (CNG) channels, nonselective cation channels, which play important roles in both visual and olfactory signal transduction. When associated with CNGA1, it is involved in the regulation of ion flow into the rod photoreceptor outer segment (ROS), in response to light-induced alteration of the levels of intracellular cG…
MCL	1	Red	36	DUOX2	Dual oxidase 2; Generates hydrogen peroxide which is required for the activity of thyroid peroxidase/TPO and lactoperoxidase/LPO. Plays a role in thyroid hormones synthesis and lactoperoxidase-mediated antimicrobial defense at the surface of mucosa. May have its own peroxidase activity through its N-terminal peroxidase-like domain
MCL	1	Red	36	DYNC2H1	Cytoplasmic dynein 2 heavy chain 1; May function as a motor for intraflagellar retrograde transport. Functions in cilia biogenesis. May play a role in transport between endoplasmic reticulum and Golgi or organization of the Golgi in cells (By similarity); Dyneins, cytoplasmic
MCL	1	Red	36	EVC2	Ellis van creveld syndrome protein 2; Limbin; Component of the EvC complex that positively regulates ciliary Hedgehog (Hh) signaling. Plays a critical role in bone formation and skeletal development. May be involved in early embryonic morphogenesis
MCL	1	Red	36	EYS	Protein eyes shut homolog; Required to maintain the integrity of photoreceptor cells; Belongs to the EYS family
MCL	1	Red	36	FOXE1	Forkhead box protein E1; Transcription factor that binds consensus sites on a variety of gene promoters and activate their transcription. Involved in proper palate formation, most probably through the expression of MSX1 and TGFB3 genes which are direct targets of this transcription factor. Also implicated in thyroid gland morphogenesis. May indirectly play a role in cell growth and migration thro…
MCL	1	Red	36	GJB2	Gap junction beta-2 protein; One gap junction consists of a cluster of closely packed pairs of transmembrane channels, the connexons, through which materials of low MW diffuse from one cell to a neighboring cell; Deafness associated genes
MCL	1	Red	36	GLI3	Transcriptional activator GLI3; Has a dual function as a transcriptional activator and a repressor of the sonic hedgehog (Shh) pathway, and plays a role in limb development. The full-length GLI3 form (GLI3FL) after phosphorylation and nuclear translocation, acts as an activator (GLI3A) while GLI3R, its C-terminally truncated form, acts as a repressor. A proper balance between the GLI3 activator a…
MCL	1	Red	36	GUCY2D	Retinal guanylyl cyclase 1; Probably plays a specific functional role in the rods and/or cones of photoreceptors. It may be the enzyme involved in the resynthesis of cGMP required for recovery of the dark state after phototransduction; Guanylate cyclase receptors
MCL	1	Red	36	IFT74	Intraflagellar transport protein 74 homolog; Component of the intraflagellar transport (IFT) complex B: together with IFT81, forms a tubulin-binding module that specifically mediates transport of tubulin within the cilium. Binds beta-tubulin via its basic region. Required for ciliogenesis; Belongs to the IFT74 family
MCL	1	Red	36	IMPG2	Interphotoreceptor matrix proteoglycan 2; Chondroitin sulfate- and hyaluronan-binding proteoglycan involved in the organization of interphotoreceptor matrix; may participate in the maturation and maintenance of the light- sensitive photoreceptor outer segment. Binds heparin
MCL	1	Red	36	KCNJ1	ATP-sensitive inward rectifier potassium channel 1; In the kidney, probably plays a major role in potassium homeostasis. Inward rectifier potassium channels are characterized by a greater tendency to allow potassium to flow into the cell rather than out of it. Their voltage dependence is regulated by the concentration of extracellular potassium; as external potassium is raised, the voltage range …
MCL	1	Red	36	KIAA0586	Protein TALPID3; Required for ciliogenesis and sonic hedgehog/SHH signaling. Required for the centrosomal recruitment of RAB8A and for the targeting of centriole satellite proteins to centrosomes such as of PCM1. May play a role in early ciliogenesis in the disappearance of centriolar satellites that preceeds ciliary vesicle formation. Involved in regulation of cell intracellular organization. In…
MCL	1	Red	36	MKKS	McKusick-Kaufman/Bardet-Biedl syndromes putative chaperonin; Probable molecular chaperone. Assists the folding of proteins upon ATP hydrolysis. As part of the BBS/CCT complex plays a role in the assembly of BBSome, a complex involved in ciliogenesis regulating transports vesicles to the cilia. May play a role in protein processing in limb, cardiac and reproductive system development. May play a r…
MCL	1	Red	36	MKS1	Meckel syndrome type 1 protein; Component of the tectonic-like complex, a complex localized at the transition zone of primary cilia and acting as a barrier that prevents diffusion of transmembrane proteins between the cilia and plasma membranes. Involved in centrosome migration to the apical cell surface during early ciliogenesis. Required for ciliary structure and function, including a role in r…
MCL	1	Red	36	MYO7A	Unconventional myosin-VIIa; Myosins are actin-based motor molecules with ATPase activity. Unconventional myosins serve in intracellular movements. Their highly divergent tails bind to membranous compartments, which are then moved relative to actin filaments. In the retina, plays an important role in the renewal of the outer photoreceptor disks. Plays an important role in the distribution and migr…
MCL	1	Red	36	OFD1	Oral-facial-digital syndrome 1 protein; Component of the centrioles controlling mother and daughter centrioles length. Recruits to the centriole IFT88 and centriole distal appendage-specific proteins including CEP164. Involved in the biogenesis of the cilium, a centriole-associated function. The cilium is a cell surface projection found in many vertebrate cells required to transduce signals impor…
MCL	1	Red	36	OXTR	Oxytocin receptor; Receptor for oxytocin. The activity of this receptor is mediated by G proteins which activate a phosphatidylinositol- calcium second messenger system; Arginine vasopressin and oxytocin receptors
MCL	1	Red	36	PDE6B	Rod cGMP-specific 3',5'-cyclic phosphodiesterase subunit beta; This protein participates in processes of transmission and amplification of the visual signal. Necessary for the formation of a functional phosphodiesterase holoenzyme; Belongs to the cyclic nucleotide phosphodiesterase family
MCL	1	Red	36	SLC12A1	Solute carrier family 12 member 1; Electrically silent transporter system. Mediates sodium and chloride reabsorption. Plays a vital role in the regulation of ionic balance and cell volume; Belongs to the SLC12A transporter family
MCL	1	Red	36	SLC26A4	Solute carrier family 26 (sodium-independent chloride/iodide transporter), member 4; Pendrin; Sodium-independent transporter of chloride and iodide; Belongs to the SLC26A/SulP transporter (TC 2.A.53) family
MCL	1	Red	36	TMEM107	Transmembrane protein 107; Plays a role in cilia formation and embryonic patterning. Requires for normal Sonic hedgehog (Shh) signaling in the neural tube and acts in combination with GLI2 and GLI3 to pattern ventral and intermediate neuronal cell types (By similarity). During ciliogenesis regulates the ciliary transition zone localization of some MKS complex proteins
MCL	1	Red	36	TMEM67	Transmembrane protein 67; Meckelin; Required for ciliary structure and function. Part of the tectonic-like complex which is required for tissue-specific ciliogenesis and may regulate ciliary membrane composition (By similarity). Involved in centrosome migration to the apical cell surface during early ciliogenesis. Involved in the regulation of cilia length and appropriate number through the contr…
MCL	1	Red	36	TPO	Thyroid peroxidase; Iodination and coupling of the hormonogenic tyrosines in thyroglobulin to yield the thyroid hormones T(3) and T(4); Belongs to the peroxidase family. XPO subfamily
MCL	1	Red	36	TRIM32	E3 ubiquitin-protein ligase TRIM32; Has an E3 ubiquitin ligase activity. Ubiquitinates DTNBP1 (dysbindin) and promotes its degradation. May ubiquitinate BBS2. May play a significant role in mediating the biological activity of the HIV-1 Tat protein in vivo. Binds specifically to the activation domain of HIV-1 Tat and can also interact with the HIV-2 and EIAV Tat proteins in vivo; Belongs to the T…
MCL	1	Red	36	USH2A	Usherin; Involved in hearing and vision; Fibronectin type III domain containing
MCL	1	Red	36	WFS1	Wolframin er transmembrane glycoprotein; Wolframin; Participates in the regulation of cellular Ca(2+) homeostasis, at least partly, by modulating the filling state of the endoplasmic reticulum Ca(2+) store; Deafness associated genes
MCL	2	Brown	35	AR	Androgen receptor; Steroid hormone receptors are ligand-activated transcription factors that regulate eukaryotic gene expression and affect cellular proliferation and differentiation in target tissues. Transcription factor activity is modulated by bound coactivator and corepressor proteins. Transcription activation is down-regulated by NR0B2. Activated, but not phosphorylated, by HIPK3 and ZIPK/D…
MCL	2	Brown	35	ASPM	Abnormal spindle-like microcephaly-associated protein; Involved in mitotic spindle regulation and coordination of mitotic processes. The function in regulating microtubule dynamics at spindle poles including spindle orientation, astral microtubule density and poleward microtubule flux seems to depend on the association with the katanin complex formed by KATNA1 and KATNB1. Enhances the microtubule…
MCL	2	Brown	35	ATM	Serine-protein kinase ATM; Serine/threonine protein kinase which activates checkpoint signaling upon double strand breaks (DSBs), apoptosis and genotoxic stresses such as ionizing ultraviolet A light (UVA), thereby acting as a DNA damage sensor. Recognizes the substrate consensus sequence [ST]-Q. Phosphorylates 'Ser-139' of histone variant H2AX/H2AFX at double strand breaks (DSBs), thereby regula…
MCL	2	Brown	35	ATR	Serine/threonine-protein kinase ATR; Serine/threonine protein kinase which activates checkpoint signaling upon genotoxic stresses such as ionizing radiation (IR), ultraviolet light (UV), or DNA replication stalling, thereby acting as a DNA damage sensor. Recognizes the substrate consensus sequence [ST]-Q. Phosphorylates BRCA1, CHEK1, MCM2, RAD17, RPA2, SMC1 and p53/TP53, which collectively inhibi…
MCL	2	Brown	35	ATRX	Transcriptional regulator ATRX; Involved in transcriptional regulation and chromatin remodeling. Facilitates DNA replication in multiple cellular environments and is required for efficient replication of a subset of genomic loci. Binds to DNA tandem repeat sequences in both telomeres and euchromatin and in vitro binds DNA quadruplex structures. May help stabilizing G-rich regions into regular chr…
MCL	2	Brown	35	BRCA1	Breast cancer type 1 susceptibility protein; E3 ubiquitin-protein ligase that specifically mediates the formation of 'Lys-6'-linked polyubiquitin chains and plays a central role in DNA repair by facilitating cellular responses to DNA damage. It is unclear whether it also mediates the formation of other types of polyubiquitin chains. The E3 ubiquitin-protein ligase activity is required for its tum…
MCL	2	Brown	35	BRCA2	Breast cancer type 2 susceptibility protein; Involved in double-strand break repair and/or homologous recombination. Binds RAD51 and potentiates recombinational DNA repair by promoting assembly of RAD51 onto single-stranded DNA (ssDNA). Acts by targeting RAD51 to ssDNA over double-stranded DNA, enabling RAD51 to displace replication protein-A (RPA) from ssDNA and stabilizing RAD51-ssDNA filaments…
MCL	2	Brown	35	BRPF1	Peregrin; Component of the MOZ/MORF complex which has a histone H3 acetyltransferase activity. Preferentially mediates histone H3-K23 acetylation. Positively regulates the transcription of RUNX1 and RUNX2; Bromodomain containing
MCL	2	Brown	35	ELP4	Elongator complex protein 4; Acts as subunit of the RNA polymerase II elongator complex, which is a histone acetyltransferase component of the RNA polymerase II (Pol II) holoenzyme and is involved in transcriptional elongation. Elongator may play a role in chromatin remodeling and is involved in acetylation of histones H3 and probably H4
MCL	2	Brown	35	EP300	Histone acetyltransferase p300; Functions as histone acetyltransferase and regulates transcription via chromatin remodeling. Acetylates all four core histones in nucleosomes. Histone acetylation gives an epigenetic tag for transcriptional activation. Mediates cAMP-gene regulation by binding specifically to phosphorylated CREB protein. Mediates acetylation of histone H3 at 'Lys-122' (H3K122ac), a …
MCL	2	Brown	35	FANCA	Fanconi anemia group A protein; DNA repair protein that may operate in a postreplication repair or a cell cycle checkpoint function. May be involved in interstrand DNA cross-link repair and in the maintenance of normal chromosome stability; Fanconi anemia complementation groups
MCL	2	Brown	35	FANCG	Fanconi anemia group G protein; DNA repair protein that may operate in a postreplication repair or a cell cycle checkpoint function. May be implicated in interstrand DNA cross-link repair and in the maintenance of normal chromosome stability. Candidate tumor suppressor gene; Fanconi anemia complementation groups
MCL	2	Brown	35	FANCI	Fanconi anemia group I protein; Plays an essential role in the repair of DNA double- strand breaks by homologous recombination and in the repair of interstrand DNA cross-links (ICLs) by promoting FANCD2 monoubiquitination by FANCL and participating in recruitment to DNA repair sites. Required for maintenance of chromosomal stability. Specifically binds branched DNA: binds both single- stranded DN…
MCL	2	Brown	35	GDNF	Glial cell line-derived neurotrophic factor; Neurotrophic factor that enhances survival and morphological differentiation of dopaminergic neurons and increases their high-affinity dopamine uptake; Belongs to the TGF-beta family. GDNF subfamily
MCL	2	Brown	35	HERC2	E3 ubiquitin-protein ligase HERC2; E3 ubiquitin-protein ligase that regulates ubiquitin- dependent retention of repair proteins on damaged chromosomes. Recruited to sites of DNA damage in response to ionizing radiation (IR) and facilitates the assembly of UBE2N and RNF8 promoting DNA damage-induced formation of 'Lys-63'-linked ubiquitin chains. Acts as a mediator of binding specificity between UB…
MCL	2	Brown	35	LARP7	La-related protein 7; Negative transcriptional regulator of polymerase II genes, acting by means of the 7SK RNP system. Within the 7SK RNP complex, the positive transcription elongation factor b (P-TEFb) is sequestered in an inactive form, preventing RNA polymerase II phosphorylation and subsequent transcriptional elongation; La ribonucleoprotein domain containing
MCL	2	Brown	35	MITF	Microphthalmia-associated transcription factor; Transcription factor that regulates the expression of genes with essential roles in cell differentiation, proliferation and survival. Binds to M-boxes (5'-TCATGTG-3') and symmetrical DNA sequences (E-boxes) (5'-CACGTG-3') found in the promoters of target genes, such as BCL2 and tyrosinase (TYR). Plays an important role in melanocyte development by r…
MCL	2	Brown	35	MRE11A	Double-strand break repair protein MRE11; Component of the MRN complex, which plays a central role in double-strand break (DSB) repair, DNA recombination, maintenance of telomere integrity and meiosis. The complex possesses single-strand endonuclease activity and double-strand- specific 3'-5' exonuclease activity, which are provided by MRE11. RAD50 may be required to bind DNA ends and hold them i…
MCL	2	Brown	35	NBN	Nibrin; Component of the MRE11-RAD50-NBN (MRN complex) which plays a critical role in the cellular response to DNA damage and the maintenance of chromosome integrity. The complex is involved in double-strand break (DSB) repair, DNA recombination, maintenance of telomere integrity, cell cycle checkpoint control and meiosis. The complex possesses single-strand endonuclease activity and double-stran…
MCL	2	Brown	35	OCA2	OCA2 melanosomal transmembrane protein; P protein; Could be involved in the transport of tyrosine, the precursor to melanin synthesis, within the melanocyte. Regulates the pH of melanosome and the melanosome maturation. One of the components of the mammalian pigmentary system. Seems to regulate the post-translational processing of tyrosinase, which catalyzes the limiting reaction in melanin synth…
MCL	2	Brown	35	PARK2	E3 ubiquitin-protein ligase parkin; Functions within a multiprotein E3 ubiquitin ligase complex, catalyzing the covalent attachment of ubiquitin moieties onto substrate proteins, such as BCL2, SYT11, CCNE1, GPR37, RHOT1/MIRO1, MFN1, MFN2, STUB1, SNCAIP, SEPT5, TOMM20, USP30, ZNF746 and AIMP2. Mediates monoubiquitination as well as 'Lys-6', 'Lys-11', 'Lys-48'-linked and 'Lys-63'-linked polyubiquit…
MCL	2	Brown	35	PAX6	Paired box protein Pax-6; Transcription factor with important functions in the development of the eye, nose, central nervous system and pancreas. Required for the differentiation of pancreatic islet alpha cells (By similarity). Competes with PAX4 in binding to a common element in the glucagon, insulin and somatostatin promoters. Regulates specification of the ventral neuron subtypes by establishi…
MCL	2	Brown	35	PDX1	Pancreas/duodenum homeobox protein 1; Activates insulin, somatostatin, glucokinase, islet amyloid polypeptide and glucose transporter type 2 gene transcription. Particularly involved in glucose-dependent regulation of insulin gene transcription. As part of a PDX1:PBX1b:MEIS2b complex in pancreatic acinar cells is involved in the transcriptional activation of the ELA1 enhancer; the complex binds t…
MCL	2	Brown	35	PHOX2B	Paired mesoderm homeobox protein 2B; Involved in the development of several major noradrenergic neuron populations, including the locus coeruleus. Transcription factor which could determine a neurotransmitter phenotype in vertebrates. Enhances second-messenger-mediated activation of the dopamine beta-hydrolase and c-fos promoters, and of several enhancers including cAMP-response element and serum…
MCL	2	Brown	35	PIEZO1	Piezo-type mechanosensitive ion channel component 1; Pore-forming subunit of a mechanosensitive non-specific cation channel. Generates currents characterized by a linear current-voltage relationship that are sensitive to ruthenium red and gadolinium. Plays a key role in epithelial cell adhesion by maintaining integrin activation through R-Ras recruitment to the ER, most probably in its activated …
MCL	2	Brown	35	PRF1	Perforin-1; Plays a key role in secretory granule-dependent cell death, and in defense against virus-infected or neoplastic cells. Plays an important role in killing other cells that are recognized as non-self by the immune system, e.g. in transplant rejection or some forms of autoimmune disease. Can insert into the membrane of target cells in its calcium-bound form, oligomerize and form large po…
MCL	2	Brown	35	PTEN	Phosphatase and tensin homolog; Tumor suppressor. Acts as a dual-specificity protein phosphatase, dephosphorylating tyrosine-, serine- and threonine- phosphorylated proteins. Also acts as a lipid phosphatase, removing the phosphate in the D3 position of the inositol ring from phosphatidylinositol 3,4,5-trisphosphate, phosphatidylinositol 3,4-diphosphate, phosphatidylinositol 3- phosphate and inos…
MCL	2	Brown	35	PURA	Transcriptional activator protein Pur-alpha; This is a probable transcription activator that specifically binds the purine-rich single strand of the PUR element located upstream of the MYC gene. May play a role in the initiation of DNA replication and in recombination
MCL	2	Brown	35	RECQL4	ATP-dependent DNA helicase Q4; DNA-dependent ATPase. May modulate chromosome segregation; Belongs to the helicase family. RecQ subfamily
MCL	2	Brown	35	TERT	Telomerase reverse transcriptase; Telomerase is a ribonucleoprotein enzyme essential for the replication of chromosome termini in most eukaryotes. Active in progenitor and cancer cells. Inactive, or very low activity, in normal somatic cells. Catalytic component of the teleromerase holoenzyme complex whose main activity is the elongation of telomeres by acting as a reverse transcriptase that adds…
MCL	2	Brown	35	TINF2	TERF1-interacting nuclear factor 2; Component of the shelterin complex (telosome) that is involved in the regulation of telomere length and protection. Shelterin associates with arrays of double-stranded TTAGGG repeats added by telomerase and protects chromosome ends; without its protective activity, telomeres are no longer hidden from the DNA damage surveillance and chromosome ends are inappropr…
MCL	2	Brown	35	TRPM1	Transient receptor potential cation channel subfamily M member 1; Cation channel essential for the depolarizing photoresponse of retinal ON bipolar cells. It is part of the GRM6 signaling cascade. May play a role in metastasis suppression (By similarity). May act as a spontaneously active, calcium-permeable plasma membrane channel; Belongs to the transient receptor (TC 1.A.4) family. LTrpC subfam…
MCL	2	Brown	35	TUBB3	Tubulin beta-3 chain; Tubulin is the major constituent of microtubules. It binds two moles of GTP, one at an exchangeable site on the beta chain and one at a non-exchangeable site on the alpha chain. TUBB3 plays a critical role in proper axon guidance and mantainance; Belongs to the tubulin family
MCL	2	Brown	35	VCP	Transitional endoplasmic reticulum ATPase; Necessary for the fragmentation of Golgi stacks during mitosis and for their reassembly after mitosis. Involved in the formation of the transitional endoplasmic reticulum (tER). The transfer of membranes from the endoplasmic reticulum to the Golgi apparatus occurs via 50-70 nm transition vesicles which derive from part-rough, part-smooth transitional ele…
MCL	2	Brown	35	WWOX	WW domain-containing oxidoreductase; Putative oxidoreductase. Acts as a tumor suppressor and plays a role in apoptosis. Required for normal bone development (By similarity). May function synergistically with p53/TP53 to control genotoxic stress-induced cell death. Plays a role in TGFB1 signaling and TGFB1-mediated cell death. May also play a role in tumor necrosis factor (TNF)-mediated cell death…
MCL	3	Dark Golden Rod	22	ACADM	Medium-chain specific acyl-CoA dehydrogenase, mitochondrial; Acyl-CoA dehydrogenase specific for acyl chain lengths of 4 to 16 that catalyzes the initial step of fatty acid beta- oxidation. Utilizes the electron transfer flavoprotein (ETF) as an electron acceptor to transfer electrons to the main mitochondrial respiratory chain via ETF-ubiquinone oxidoreductase (ETF dehydrogenase)
MCL	3	Dark Golden Rod	22	ACADSB	Short/branched chain specific acyl-CoA dehydrogenase, mitochondrial; Has greatest activity toward short branched chain acyl- CoA derivative such as (s)-2-methylbutyryl-CoA, isobutyryl-CoA, and 2-methylhexanoyl-CoA as well as toward short straight chain acyl-CoAs such as butyryl-CoA and hexanoyl-CoA. Can use valproyl- CoA as substrate and may play a role in controlling the metabolic flux of valpro…
MCL	3	Dark Golden Rod	22	ACO2	Aconitate hydratase, mitochondrial; Catalyzes the isomerization of citrate to isocitrate via cis-aconitate; Belongs to the aconitase/IPM isomerase family
MCL	3	Dark Golden Rod	22	ACSF3	Acyl-CoA synthetase family member 3, mitochondrial; Catalyzes the initial reaction in intramitochondrial fatty acid synthesis, by activating malonate and methylmalonate, but not acetate, into their respective CoA thioester. May have some preference toward very-long-chain substrates; Acyl-CoA synthetase family
MCL	3	Dark Golden Rod	22	ALDOB	Fructose-bisphosphate aldolase, class i; Belongs to the class I fructose-bisphosphate aldolase family
MCL	3	Dark Golden Rod	22	BTD	Biotinidase; Catalytic release of biotin from biocytin, the product of biotin-dependent carboxylases degradation
MCL	3	Dark Golden Rod	22	DPYD	Dihydropyrimidine dehydrogenase [NADP(+)]; Involved in pyrimidine base degradation. Catalyzes the reduction of uracil and thymine. Also involved the degradation of the chemotherapeutic drug 5-fluorouracil; Belongs to the dihydropyrimidine dehydrogenase family
MCL	3	Dark Golden Rod	22	ECHS1	Enoyl-CoA hydratase, mitochondrial; Straight-chain enoyl-CoA thioesters from C4 up to at least C16 are processed, although with decreasing catalytic rate. Has high substrate specificity for crotonyl-CoA and moderate specificity for acryloyl-CoA, 3-methylcrotonyl-CoA and methacrylyl-CoA. It is noteworthy that binds tiglyl-CoA, but hydrates only a small amount of this substrate
MCL	3	Dark Golden Rod	22	EHMT1	[histone h3]-lysine9 n-trimethyltransferase ehmt; Histone-lysine N-methyltransferase EHMT1; Histone methyltransferase that specifically mono- and dimethylates 'Lys-9' of histone H3 (H3K9me1 and H3K9me2, respectively) in euchromatin. H3K9me represents a specific tag for epigenetic transcriptional repression by recruiting HP1 proteins to methylated histones. Also weakly methylates 'Lys-27' of histo…
MCL	3	Dark Golden Rod	22	GCDH	Glutaryl-CoA dehydrogenase, mitochondrial; Catalyzes the oxidative decarboxylation of glutaryl-CoA to crotonyl-CoA and CO(2) in the degradative pathway of L-lysine, L-hydroxylysine, and L-tryptophan metabolism. It uses electron transfer flavoprotein as its electron acceptor. Isoform Short is inactive; Belongs to the acyl-CoA dehydrogenase family
MCL	3	Dark Golden Rod	22	HADHA	Trifunctional enzyme subunit alpha, mitochondrial; Bifunctional subunit; In the central section; belongs to the 3-hydroxyacyl- CoA dehydrogenase family
MCL	3	Dark Golden Rod	22	HLCS	Holocarboxylase synthetase; Biotin--protein ligase; Post-translational modification of specific protein by attachment of biotin. Acts on various carboxylases such as acetyl- CoA-carboxylase, pyruvate carboxylase, propionyl CoA carboxylase, and 3-methylcrotonyl CoA carboxylase
MCL	3	Dark Golden Rod	22	HPDL	4-hydroxyphenylpyruvate dioxygenase-like protein; May have dioxygenase activity
MCL	3	Dark Golden Rod	22	MCCC1	Methylcrotonoyl-CoA carboxylase subunit alpha, mitochondrial; Biotin-attachment subunit of the 3-methylcrotonyl-CoA carboxylase, an enzyme that catalyzes the conversion of 3- methylcrotonyl-CoA to 3-methylglutaconyl-CoA, a critical step for leucine and isovaleric acid catabolism
MCL	3	Dark Golden Rod	22	MCCC2	Methylcrotonoyl-CoA carboxylase beta chain, mitochondrial; Carboxyltransferase subunit of the 3-methylcrotonyl-CoA carboxylase, an enzyme that catalyzes the conversion of 3- methylcrotonyl-CoA to 3-methylglutaconyl-CoA, a critical step for leucine and isovaleric acid catabolism; Belongs to the AccD/PCCB family
MCL	3	Dark Golden Rod	22	MMAA	Methylmalonic aciduria type A protein, mitochondrial; GTPase, binds and hydrolyzes GTP. Involved in intracellular vitamin B12 metabolism, mediates the transport of cobalamin (Cbl) into mitochondria for the final steps of adenosylcobalamin (AdoCbl) synthesis. Functions as a G-protein chaperone that assists AdoCbl cofactor delivery from MMAB to the methylmalonyl-CoA mutase (MUT) and reactivation of…
MCL	3	Dark Golden Rod	22	NDUFAF2	NADH dehydrogenase [ubiquinone] 1 alpha subcomplex assembly factor 2; Acts as a molecular chaperone for mitochondrial complex I assembly. Complex I functions in the transfer of electrons from NADH to the respiratory chain. The immediate electron acceptor for the enzyme is believed to be ubiquinone
MCL	3	Dark Golden Rod	22	NDUFB3	NADH dehydrogenase [ubiquinone] 1 beta subcomplex subunit 3; Accessory subunit of the mitochondrial membrane respiratory chain NADH dehydrogenase (Complex I), that is believed not to be involved in catalysis. Complex I functions in the transfer of electrons from NADH to the respiratory chain. The immediate electron acceptor for the enzyme is believed to be ubiquinone
MCL	3	Dark Golden Rod	22	PCCA	This is one of the 2 subunits of the biotin-dependent propionyl-CoA carboxylase (PCC), a mitochondrial enzyme involved in the catabolism of odd chain fatty acids, branched-chain amino acids isoleucine, threonine, methionine, and valine and other metabolites . Propionyl-CoA carboxylase catalyzes the carboxylation of propionyl-CoA/propanoyl-CoA to D-methylmalonyl- CoA/(S)-methylmalonyl-CoA Within t…
MCL	3	Dark Golden Rod	22	PCCB	This is one of the 2 subunits of the biotin-dependent propionyl-CoA carboxylase (PCC), a mitochondrial enzyme involved in the catabolism of odd chain fatty acids, branched-chain amino acids isoleucine, threonine, methionine, and valine and other metabolites . Propionyl-CoA carboxylase catalyzes the carboxylation of propionyl-CoA/propanoyl-CoA to D-methylmalonyl- CoA/(S)-methylmalonyl-CoA . Within…
MCL	3	Dark Golden Rod	22	SDHA	Succinate dehydrogenase [ubiquinone] flavoprotein subunit, mitochondrial; Flavoprotein (FP) subunit of succinate dehydrogenase (SDH) that is involved in complex II of the mitochondrial electron transport chain and is responsible for transferring electrons from succinate to ubiquinone (coenzyme Q). Can act as a tumor suppressor; Belongs to the FAD-dependent oxidoreductase 2 family. FRD/SDH subfami…
MCL	3	Dark Golden Rod	22	TMEM126B	Complex I assembly factor TMEM126B, mitochondrial; Chaperone protein involved in the assembly of the mitochondrial NADH:ubiquinone oxidoreductase complex (complex I). Participates in constructing the membrane arm of complex I
MCL	4	Yellow	17	ADCK3	Atypical kinase COQ8A, mitochondrial; Atypical kinase involved in the biosynthesis of coenzyme Q, also named ubiquinone, an essential lipid-soluble electron transporter for aerobic cellular respiration. Its substrate specificity is unclear: does not show any protein kinase activity. Probably acts as a small molecule kinase, possibly a lipid kinase that phosphorylates a prenyl lipid in the ubiquin…
MCL	4	Yellow	17	ANO10	Anoctamin-10; Does not exhibit calcium-activated chloride channel (CaCC) activity. Can inhibit the activity of ANO1; Belongs to the anoctamin family
MCL	4	Yellow	17	ANO5	Anoctamin-5; Does not exhibit calcium-activated chloride channel (CaCC) activity; Anoctamins
MCL	4	Yellow	17	DMD	Dystrophin; Anchors the extracellular matrix to the cytoskeleton via F-actin. Ligand for dystroglycan. Component of the dystrophin- associated glycoprotein complex which accumulates at the neuromuscular junction (NMJ) and at a variety of synapses in the peripheral and central nervous systems and has a structural function in stabilizing the sarcolemma. Also implicated in signaling events and synap…
MCL	4	Yellow	17	FBN1	Fibrillin-1; Fibrillin-1: Structural component of the 10-12 nm diameter microfibrils of the extracellular matrix, which conveys both structural and regulatory properties to load-bearing connective tissues. Fibrillin-1- containing microfibrils provide long-term force bearing structural support. In tissues such as the lung, blood vessels and skin, microfibrils form the periphery of the elastic fibe…
MCL	4	Yellow	17	GAN	Kelch-like protein 16 (gigaxonin); Gigaxonin; Probable cytoskeletal component that directly or indirectly plays an important role in neurofilament architecture. May act as a substrate-specific adapter of an E3 ubiquitin-protein ligase complex which mediates the ubiquitination and subsequent proteasomal degradation of target proteins. Controls degradation of TBCB. Controls degradation of MAP1B and…
MCL	4	Yellow	17	GATA4	Transcription factor GATA-4; Transcriptional activator that binds to the consensus sequence 5'-AGATAG-3' and plays a key role in cardiac development and function. In cooperation with TBX5, it binds to cardiac super-enhancers and promotes cardiomyocyte gene expression, while it downregulates endocardial and endothelial gene expression. Involved in bone morphogenetic protein (BMP)-mediated inductio…
MCL	4	Yellow	17	LAMA2	Laminin subunit alpha-2; Binding to cells via a high affinity receptor, laminin is thought to mediate the attachment, migration and organization of cells into tissues during embryonic development by interacting with other extracellular matrix components
MCL	4	Yellow	17	MYH7	Myosin heavy chain 6/7; Myosin-7; Myosins are actin-based motor molecules with ATPase activity essential for muscle contraction. Forms regular bipolar thick filaments that, together with actin thin filaments, constitute the fundamental contractile unit of skeletal and cardiac muscle; Belongs to the TRAFAC class myosin-kinesin ATPase superfamily. Myosin family
MCL	4	Yellow	17	NEB	Nebulin
MCL	4	Yellow	17	POLG	DNA polymerase subunit gamma-1; Involved in the replication of mitochondrial DNA. Associates with mitochondrial DNA; Belongs to the DNA polymerase type-A family
MCL	4	Yellow	17	RYR1	Ryanodine receptor 1; Calcium channel that mediates the release of Ca(2+) from the sarcoplasmic reticulum into the cytoplasm and thereby plays a key role in triggering muscle contraction following depolarization of T-tubules. Repeated very high-level exercise increases the open probability of the channel and leads to Ca(2+) leaking into the cytoplasm. Can also mediate the release of Ca(2+) from i…
MCL	4	Yellow	17	RYR2	Ryanodine receptor 2; Calcium channel that mediates the release of Ca(2+) from the sarcoplasmic reticulum into the cytoplasm and thereby plays a key role in triggering cardiac muscle contraction. Aberrant channel activation can lead to cardiac arrhythmia. In cardiac myocytes, calcium release is triggered by increased Ca(2+) levels due to activation of the L-type calcium channel CACNA1C. The calci…
MCL	4	Yellow	17	SACS	Sacsin; Co-chaperone which acts as a regulator of the Hsp70 chaperone machinery and may be involved in the processing of other ataxia-linked proteins; DNAJ heat shock proteins
MCL	4	Yellow	17	SPG7	Paraplegin; ATP-dependent zinc metalloprotease. Plays a role in the formation and regulation of the mitochondrial permeability transition pore (mPTP) and its proteolytic activity is dispensable for this function; In the N-terminal section; belongs to the AAA ATPase family
MCL	4	Yellow	17	SYNE1	Nesprin-1; Multi-isomeric modular protein which forms a linking network between organelles and the actin cytoskeleton to maintain the subcellular spatial organization. As a component of the LINC (LInker of Nucleoskeleton and Cytoskeleton) complex involved in the connection between the nuclear lamina and the cytoskeleton. The nucleocytoplasmic interactions established by the LINC complex play an i…
MCL	4	Yellow	17	TTN	Titin; Key component in the assembly and functioning of vertebrate striated muscles. By providing connections at the level of individual microfilaments, it contributes to the fine balance of forces between the two halves of the sarcomere. The size and extensibility of the cross-links are the main determinants of sarcomere extensibility properties of muscle. In non-muscle cells, seems to play a ro…
MCL	5	Olive	15	ARSA	Arylsulfatase A; Hydrolyzes cerebroside sulfate; Belongs to the sulfatase family
MCL	5	Olive	15	ASAH1	N-acylsphingosine amidohydrolase 1; Acid ceramidase; Hydrolyzes the sphingolipid ceramide into sphingosine and free fatty acid
MCL	5	Olive	15	ATP7B	Copper-transporting ATPase 2; Copper ion transmembrane transporter involved in the export of copper out of the cells, such as the efflux of hepatic copper into the bile; ATPase copper transporting
MCL	5	Olive	15	BCHE	Butyrylcholinesterase; Cholinesterase; Esterase with broad substrate specificity. Contributes to the inactivation of the neurotransmitter acetylcholine. Can degrade neurotoxic organophosphate esters; Belongs to the type-B carboxylesterase/lipase family
MCL	5	Olive	15	CP	Ceruloplasmin; Ceruloplasmin is a blue, copper-binding (6-7 atoms per molecule) glycoprotein. It has ferroxidase activity oxidizing Fe(2+) to Fe(3+) without releasing radical oxygen species. It is involved in iron transport across the cell membrane. Provides Cu(2+) ions for the ascorbate-mediated deaminase degradation of the heparan sulfate chains of GPC1. May also play a role in fetal lung devel…
MCL	5	Olive	15	FA2H	Fatty acid 2-hydroxylase; Required for alpha-hydroxylation of free fatty acids and the formation of alpha-hydroxylated sphingolipids; Belongs to the sterol desaturase family. SCS7 subfamily
MCL	5	Olive	15	GALC	Galactosylceramidase; Galactocerebrosidase; Hydrolyzes the galactose ester bonds of galactosylceramide, galactosylsphingosine, lactosylceramide, and monogalactosyldiglyceride. Enzyme with very low activity responsible for the lysosomal catabolism of galactosylceramide, a major lipid in myelin, kidney and epithelial cells of small intestine and colon; Belongs to the glycosyl hydrolase 59 family
MCL	5	Olive	15	HEXA	Beta-hexosaminidase subunit alpha; Responsible for the degradation of GM2 gangliosides, and a variety of other molecules containing terminal N-acetyl hexosamines, in the brain and other tissues. The form B is active against certain oligosaccharides. The form S has no measurable activity; Belongs to the glycosyl hydrolase 20 family
MCL	5	Olive	15	HGSNAT	Heparan-alpha-glucosaminide N-acetyltransferase; Lysosomal acetyltransferase that acetylates the non- reducing terminal alpha-glucosamine residue of intralysosomal heparin or heparan sulfate, converting it into a substrate for luminal alpha-N-acetyl glucosaminidase
MCL	5	Olive	15	MADD	MAP kinase-activating death domain protein; Plays a significant role in regulating cell proliferation, survival and death through alternative mRNA splicing. Isoform 5 shows increased cell proliferation and isoform 2 shows decreased. Converts GDP-bound inactive form of RAB3A, RAB3C and RAB3D to the GTP-bound active forms. Component of the TNFRSF1A signaling complex: MADD links TNFRSF1A with MAP ki…
MCL	5	Olive	15	NAGA	Alpha-N-acetylgalactosaminidase; Removes terminal alpha-N-acetylgalactosamine residues from glycolipids and glycopeptides. Required for the breakdown of glycolipids
MCL	5	Olive	15	PPOX	Protoporphyrinogen/coproporphyrinogen iii oxidase; Protoporphyrinogen oxidase; Catalyzes the 6-electron oxidation of protoporphyrinogen-IX to form protoporphyrin-IX
MCL	5	Olive	15	SGSH	N-sulphoglucosamine sulphohydrolase; Catalyzes a step in lysosomal heparan sulfate degradation; Belongs to the sulfatase family
MCL	5	Olive	15	SMPD1	Sphingomyelin phosphodiesterase; Converts sphingomyelin to ceramide. Also has phospholipase C activities toward 1,2-diacylglycerolphosphocholine and 1,2-diacylglycerolphosphoglycerol
MCL	5	Olive	15	WDR45	WD repeat domain phosphoinositide-interacting protein 4; Plays an important role in the autophagy pathway, which is the major intracellular degradation system by which cytoplasmic materials are packaged into autophagosomes and delivered to lysosomes for degradation; Belongs to the WD repeat SVP1 family
MCL	6	Green	13	ABCC8	ATP-binding cassette sub-family C member 8; Subunit of the beta-cell ATP-sensitive potassium channel (KATP). Regulator of ATP-sensitive K(+) channels and insulin release; ATP binding cassette subfamily C
MCL	6	Green	13	ANK2	Ankyrin-2; In skeletal muscle, required for proper localization of DMD and DCTN4 and for the formation and/or stability of a special subset of microtubules associated with costameres and neuromuscular junctions. Attaches integral membrane proteins to cytoskeletal elements. Also binds to cytoskeletal proteins. Required for coordinate assembly of Na/Ca exchanger, Na/K ATPase and InsP3 receptor at s…
MCL	6	Green	13	ARX	Homeobox protein ARX; Transcription factor required for normal brain development. May be important for maintenance of specific neuronal subtypes in the cerebral cortex and axonal guidance in the floor plate; Belongs to the paired homeobox family. Bicoid subfamily
MCL	6	Green	13	DEPDC5	Dep domain containing 5, gator1 subcomplex subunit; GATOR complex protein DEPDC5; As a component of the GATOR1 complex functions as an inhibitor of the amino acid-sensing branch of the TORC1 pathway. The GATOR1 complex strongly increases GTP hydrolysis by RRAGA and RRAGB within RRAGC-containing heterodimers, thereby deactivating RRAGs, releasing mTORC1 from lysosomal surface and inhibiting mTORC1…
MCL	6	Green	13	FLCN	Folliculin; May be a tumor suppressor. May be involved in energy and/or nutrient sensing through the AMPK and mTOR signaling pathways. May regulate phosphorylation of RPS6KB1; DENN/MADD domain containing
MCL	6	Green	13	KANSL1	KAT8 regulatory NSL complex subunit 1; As part of the NSL complex it is involved in acetylation of nucleosomal histone H4 on several lysine residues and therefore may be involved in the regulation of transcription
MCL	6	Green	13	KCNT1	Potassium channel subfamily T member 1; Outwardly rectifying potassium channel subunit that may coassemble with other Slo-type channel subunits. Activated by high intracellular sodium or chloride levels. Activated upon stimulation of G-protein coupled receptors, such as CHRM1 and GRIA1. May be regulated by calcium in the absence of sodium ions (in vitro) (By similarity); Belongs to the potassium …
MCL	6	Green	13	MECP2	Methyl-CpG-binding protein 2; Chromosomal protein that binds to methylated DNA. It can bind specifically to a single methyl-CpG pair. It is not influenced by sequences flanking the methyl-CpGs. Mediates transcriptional repression through interaction with histone deacetylase and the corepressor SIN3A. Binds both 5-methylcytosine (5mC) and 5-hydroxymethylcytosine (5hmC)-containing DNA, with a prefe…
MCL	6	Green	13	PRRT2	Proline rich transmembrane protein 2; Interferon induced transmembrane protein domain containing; Belongs to the CD225/Dispanin family
MCL	6	Green	13	SCN1A	Sodium channel protein type 1 subunit alpha; Mediates the voltage-dependent sodium ion permeability of excitable membranes. Assuming opened or closed conformations in response to the voltage difference across the membrane, the protein forms a sodium-selective channel through which Na(+) ions may pass in accordance with their electrochemical gradient. Plays a key role in brain, probably by regulat…
MCL	6	Green	13	SCN9A	Sodium channel protein type 9 subunit alpha; Mediates the voltage-dependent sodium ion permeability of excitable membranes. Assuming opened or closed conformations in response to the voltage difference across the membrane, the protein forms a sodium-selective channel through which Na(+) ions may pass in accordance with their electrochemical gradient. It is a tetrodotoxin-sensitive Na(+) channel i…
MCL	6	Green	13	SPTAN1	Spectrin alpha chain, non-erythrocytic 1; Fodrin, which seems to be involved in secretion, interacts with calmodulin in a calcium-dependent manner and is thus candidate for the calcium-dependent movement of the cytoskeleton at the membrane; EF-hand domain containing
MCL	6	Green	13	UNC80	Unc-80 homolog, NALCN channel complex subunit; Protein unc-80 homolog; Component of the NALCN sodium channel complex, required for channel regulation. This complex is a cation channel activated by neuropeptides substance P, neurotensin, and extracellular calcium that regulates neuronal excitability by controlling the sizes of NALCN-dependent sodium-leak current. UNC80 is essential for NALCN sensi…
MCL	7	Forest Green	7	ASL	Argininosuccinate lyase
MCL	7	Forest Green	7	EXOSC8	Exosome complex component RRP43; Non-catalytic component of the RNA exosome complex which has 3'->5' exoribonuclease activity and participates in a multitude of cellular RNA processing and degradation events. In the nucleus, the RNA exosome complex is involved in proper maturation of stable RNA species such as rRNA, snRNA and snoRNA, in the elimination of RNA processing by-products and non-coding…
MCL	7	Forest Green	7	GATM	Glycine amidinotransferase, mitochondrial; Catalyzes the biosynthesis of guanidinoacetate, the immediate precursor of creatine. Creatine plays a vital role in energy metabolism in muscle tissues. May play a role in embryonic and central nervous system development. May be involved in the response to heart failure by elevating local creatine synthesis; Belongs to the amidinotransferase family
MCL	7	Forest Green	7	GLDC	Glycine dehydrogenase (decarboxylating), mitochondrial; The glycine cleavage system catalyzes the degradation of glycine. The P protein (GLDC) binds the alpha-amino group of glycine through its pyridoxal phosphate cofactor; CO(2) is released and the remaining methylamine moiety is then transferred to the lipoamide cofactor of the H protein (GCSH)
MCL	7	Forest Green	7	SBDS	Ribosome maturation protein SBDS; Required for the assembly of mature ribosomes and ribosome biogenesis. Together with EFL1, triggers the GTP- dependent release of EIF6 from 60S pre-ribosomes in the cytoplasm, thereby activating ribosomes for translation competence by allowing 80S ribosome assembly and facilitating EIF6 recycling to the nucleus, where it is required for 60S rRNA processing and nu…
MCL	7	Forest Green	7	SPATA5	Spermatogenesis-associated protein 5; May be involved in morphological and functional mitochondrial transformations during spermatogenesis; Belongs to the AAA ATPase family. AFG2 subfamily
MCL	7	Forest Green	7	SPATA5L1	Spermatogenesis-associated protein 5-like protein 1; Spermatogenesis associated 5 like 1; Belongs to the AAA ATPase family. AFG2 subfamily
MCL	8	Light Green	6	ACY1	ABHD14A-ACY1 readthrough; Aminoacylase-1; Involved in the hydrolysis of N-acylated or N-acetylated amino acids (except L-aspartate); Belongs to the peptidase M20A family
MCL	8	Light Green	6	CPA6	Carboxypeptidase A6; May be involved in the proteolytic inactivation of enkephalins and neurotensin in some brain areas. May convert inactive angiotensin I into the biologically active angiotensin II. Releases a C-terminal amino acid, with preference for large hydrophobic C-terminal amino acids and shows only very weak activity toward small amino acids and histidine; M14 carboxypeptidases
MCL	8	Light Green	6	DST	Dystonin; Cytoskeletal linker protein. Acts as an integrator of intermediate filaments, actin and microtubule cytoskeleton networks. Required for anchoring either intermediate filaments to the actin cytoskeleton in neural and muscle cells or keratin- containing intermediate filaments to hemidesmosomes in epithelial cells. The proteins may self-aggregate to form filaments or a two- dimensional mes…
MCL	8	Light Green	6	FTCD	Formimidoyltransferase-cyclodeaminase; Folate-dependent enzyme, that displays both transferase and deaminase activity. Serves to channel one-carbon units from formiminoglutamate to the folate pool; In the N-terminal section; belongs to the formiminotransferase family
MCL	8	Light Green	6	PAH	Phenylalanine-4-hydroxylase; Catalyzes the hydroxylation of L-phenylalanine to L-tyrosine
MCL	8	Light Green	6	PROC	Vitamin K-dependent protein C; Protein C is a vitamin K-dependent serine protease that regulates blood coagulation by inactivating factors Va and VIIIa in the presence of calcium ions and phospholipids. Exerts a protective effect on the endothelial cell barrier function; Belongs to the peptidase S1 family
MCL	9	Lime Green	5	DPAGT1	UDP-N-acetylglucosamine--dolichyl-phosphate N-acetylglucosaminephosphotransferase; Catalyzes the initial step in the synthesis of dolichol- P-P-oligosaccharides
MCL	9	Lime Green	5	GALT	UDPglucose--hexose-1-phosphate uridylyltransferase; Galactose-1-phosphate uridylyltransferase; Plays an important role in galactose metabolism
MCL	9	Lime Green	5	GMPPB	Mannose-1-phosphate guanyltransferase beta; Catalyzes the formation of GDP-mannose, an essential precursor of glycan moieties of glycoproteins and glycolipids; Belongs to the transferase hexapeptide repeat family
MCL	9	Lime Green	5	PMM2	Phosphomannomutase 2; Involved in the synthesis of the GDP-mannose and dolichol-phosphate-mannose required for a number of critical mannosyl transfer reactions; HAD Asp-based non-protein phosphatases
MCL	9	Lime Green	5	PREPL	Prolyl endopeptidase-like; Probable serine peptidase whose precise substrate specificity remains unclear. Does not cleave peptides after a arginine or lysine residue. May play a role in the regulation of synaptic vesiscle exocytosis
MCL	10	Cyan	5	PEX1	Peroxisomal biogenesis factor 1; Peroxisome biogenesis factor 1; Required for stability of PEX5 and protein import into the peroxisome matrix. Anchored by PEX26 to peroxisome membranes, possibly to form heteromeric AAA ATPase complexes required for the import of proteins into peroxisomes
MCL	10	Cyan	5	PEX11B	Peroxisomal membrane protein 11B; Involved in peroxisomal proliferation. May regulate peroxisome division by recruiting the dynamin-related GTPase DNM1L to the peroxisomal membrane. Promotes membrane protrusion and elongation on the peroxisomal surface; Belongs to the peroxin-11 family
MCL	10	Cyan	5	PEX6	Peroxisomal biogenesis factor 6; Peroxisome assembly factor 2; Involved in peroxisome biosynthesis. Required for stability of the PTS1 receptor. Anchored by PEX26 to peroxisome membranes, possibly to form heteromeric AAA ATPase complexes required for the import of proteins into peroxisomes
MCL	10	Cyan	5	PHYH	Phytanoyl-CoA dioxygenase, peroxisomal; Converts phytanoyl-CoA to 2-hydroxyphytanoyl-CoA
MCL	10	Cyan	5	PTPN23	Tyrosine-protein phosphatase non-receptor type 23; Plays a role in sorting of endocytic ubiquitinated cargos into multivesicular bodies (MVBs) via its interaction with the ESCRT-I complex (endosomal sorting complex required for transport I), and possibly also other ESCRT complexes. May act as a negative regulator of Ras-mediated mitogenic activity. Plays a role in ciliogenesis; Protein tyrosine p…
MCL	11	Medium Purple	4	ADAR	Double-stranded RNA-specific adenosine deaminase; Catalyzes the hydrolytic deamination of adenosine to inosine in double-stranded RNA (dsRNA) referred to as A-to-I RNA editing. This may affect gene expression and function in a number of ways that include mRNA translation by changing codons and hence the amino acid sequence of proteins; pre-mRNA splicing by altering splice site recognition sequenc…
MCL	11	Medium Purple	4	IFIH1	Interferon-induced helicase C domain-containing protein 1; Innate immune receptor which acts as a cytoplasmic sensor of viral nucleic acids and plays a major role in sensing viral infection and in the activation of a cascade of antiviral responses including the induction of type I interferons and proinflammatory cytokines. Its ligands include mRNA lacking 2'-O- methylation at their 5' cap and lon…
MCL	11	Medium Purple	4	RBM8A	RNA-binding protein 8A; Core component of the splicing-dependent multiprotein exon junction complex (EJC) deposited at splice junctions on mRNAs. The EJC is a dynamic structure consisting of core proteins and several peripheral nuclear and cytoplasmic associated factors that join the complex only transiently either during EJC assembly or during subsequent mRNA metabolism. The EJC marks the positi…
MCL	11	Medium Purple	4	RNASEH2B	Ribonuclease H2 subunit B; Non catalytic subunit of RNase H2, an endonuclease that specifically degrades the RNA of RNA:DNA hybrids. Participates in DNA replication, possibly by mediating the removal of lagging- strand Okazaki fragment RNA primers during DNA replication. Mediates the excision of single ribonucleotides from DNA:RNA duplexes
MCL	12	Medium Purple 2	3	CYP27A1	Sterol 26-hydroxylase, mitochondrial; Catalyzes the first step in the oxidation of the side chain of sterol intermediates; the 27-hydroxylation of 5-beta- cholestane-3-alpha,7-alpha,12-alpha-triol. Has also a vitamin D3- 25-hydroxylase activity; Belongs to the cytochrome P450 family
MCL	12	Medium Purple 2	3	DHCR7	7-dehydrocholesterol reductase; Production of cholesterol by reduction of C7-C8 double bond of 7-dehydrocholesterol (7-DHC); Belongs to the ERG4/ERG24 family
MCL	12	Medium Purple 2	3	MVK	Mevalonate kinase; May be a regulatory site in cholesterol biosynthetic pathway; Belongs to the GHMP kinase family. Mevalonate kinase subfamily
MCL	13	Orchid	3	GHR	Growth hormone receptor; Receptor for pituitary gland growth hormone involved in regulating postnatal body growth. On ligand binding, couples to the JAK2/STAT5 pathway (By similarity); Belongs to the type I cytokine receptor family. Type 1 subfamily
MCL	13	Orchid	3	PROKR2	Prokineticin receptor 2; Receptor for prokineticin 2. Exclusively coupled to the G(q) subclass of heteromeric G proteins. Activation leads to mobilization of calcium, stimulation of phosphoinositide turnover and activation of p44/p42 mitogen-activated protein kinase
MCL	13	Orchid	3	PROP1	Homeobox protein prophet of Pit-1; Possibly involved in the ontogenesis of pituitary gonadotropes, as well as somatotropes, lactotropes and caudomedial thyrotropes; PRD class homeoboxes and pseudogenes
MCL	14	Purple	3	APC	Adenomatous polyposis coli protein; Tumor suppressor. Promotes rapid degradation of CTNNB1 and participates in Wnt signaling as a negative regulator. APC activity is correlated with its phosphorylation state. Activates the GEF activity of SPATA13 and ARHGEF4. Plays a role in hepatocyte growth factor (HGF)-induced cell migration. Required for MMP9 up-regulation via the JNK signaling pathway in col…
MCL	14	Purple	3	DLG4	Disks large homolog 4; Interacts with the cytoplasmic tail of NMDA receptor subunits and shaker-type potassium channels. Required for synaptic plasticity associated with NMDA receptor signaling. Overexpression or depletion of DLG4 changes the ratio of excitatory to inhibitory synapses in hippocampal neurons. May reduce the amplitude of ASIC3 acid-evoked currents by retaining the channel intracell…
MCL	14	Purple	3	LRP5	Low-density lipoprotein receptor-related protein 5; Component of the Wnt-Fzd-LRP5-LRP6 complex that triggers beta-catenin signaling through inducing aggregation of receptor- ligand complexes into ribosome-sized signalsomes. Cell-surface coreceptor of Wnt/beta-catenin signaling, which plays a pivotal role in bone formation. Plays a role in norrin (NDP) signal transduction. The Wnt-induced Fzd/LRP6…
MCL	15	Hot Pink	3	SLC36A2	Proton-coupled amino acid transporter 2; Involved in a pH-dependent electrogenic neuronal transport and sequestration of small amino acids. Transports glycine and proline. Inhibited by sarcosine (By similarity); Belongs to the amino acid/polyamine transporter 2 family
MCL	15	Hot Pink	3	SLC3A1	Neutral and basic amino acid transport protein rBAT; Involved in the high-affinity, sodium-independent transport of cystine and neutral and dibasic amino acids (system B(0,+)-like activity). May function as an activator of SLC7A9 and be involved in the high-affinity reabsorption of cystine in the kidney tubule; Solute carriers
MCL	15	Hot Pink	3	SLC6A19	Sodium-dependent neutral amino acid transporter B(0)AT1; Transporter that mediates resorption of neutral amino acids across the apical membrane of renal and intestinal epithelial cells. This uptake is sodium-dependent and chloride- independent; Belongs to the sodium:neurotransmitter symporter (SNF) (TC 2.A.22) family. SLC6A19 subfamily
MCL	16	Pink	2	ALOXE3	Hydroperoxy icosatetraenoate dehydratase/isomerase; Hydroperoxide isomerase ALOXE3; Non-heme iron-containing lipoxygenase which is atypical in that it displays a prominent hydroperoxide isomerase activity and a reduced dioxygenase activity compared to other lipoxygenases. The hydroperoxide isomerase activity catalyzes the isomerization of hydroperoxides, derived from arachidonic and linoleic acid…
MCL	16	Pink	2	HES7	Transcription factor HES-7; Transcriptional repressor. Represses transcription from both N box- and E box-containing promoters. May with HES1, cooperatively regulate somite formation in the presomitic mesoderm (PSM). May function as a segmentation clock, which is essential for coordinated somite segmentation (By similarity); Basic helix-loop-helix proteins

## Sheet: Enrichment subnetwork1 shared
#category	term ID	term description	observed gene count	background gene count	strength	false discovery rate	matching proteins in your network (labels)
GO Biological Process
GO Process	GO:0007601	Visual perception	14	220	1.54	3.12e-14	IMPG2,WFS1,MKKS,CNGB1,GUCY2D,BBS7,USH2A,BBS1,ABCA4,CDH23,MYO7A,BEST1,PDE6B,EYS
GO Process	GO:0060271	Cilium assembly	13	339	1.32	1.10e-10	MKKS,BBS7,TMEM107,BBS1,OFD1,KIAA0586,AHI1,MKS1,DYNC2H1,C5orf42,TMEM67,IFT74,CEP290
GO Process	GO:0007600	Sensory perception	16	923	0.97	3.69e-09	IMPG2,WFS1,MKKS,CNGB1,GUCY2D,BBS7,SLC26A4,USH2A,BBS1,ABCA4,GJB2,CDH23,MYO7A,BEST1,PDE6B,EYS
GO Process	GO:0120036	Plasma membrane bounded cell projection organization	17	1122	0.92	4.21e-09	MKKS,BBS7,TMEM107,BBS1,OFD1,KIAA0586,AHI1,MKS1,GLI3,DYNC2H1,CDH23,MYO7A,C5orf42,TMEM67,IFT74,TRIM32,CEP290
GO Process	GO:1905515	Non-motile cilium assembly	7	45	1.93	6.82e-09	MKKS,BBS7,TMEM107,BBS1,MKS1,DYNC2H1,IFT74
GO Process	GO:0070925	Organelle assembly	14	735	2023-02-01	2.55e-08	MKKS,BBS7,TMEM107,BBS1,OFD1,KIAA0586,AHI1,MKS1,DYNC2H1,MYO7A,C5orf42,TMEM67,IFT74,CEP290
GO Process	GO:0050877	Nervous system process	17	1352	0.83	5.23e-08	IMPG2,WFS1,MKKS,CNGB1,GUCY2D,BBS7,SLC26A4,USH2A,BBS1,OXTR,ABCA4,GJB2,CDH23,MYO7A,BEST1,PDE6B,EYS
GO Process	GO:0045494	Photoreceptor cell maintenance	6	41	2023-09-01	2.49e-07	MKKS,CNGB1,USH2A,BBS1,ABCA4,CDH23
GO Process	GO:0032501	Multicellular organismal process	31	6933	0.39	4.74e-07	IMPG2,WFS1,MKKS,CNGB1,GUCY2D,BBS7,SLC26A4,USH2A,TMEM107,BBS1,TPO,OXTR,OFD1,AHI1,ABCA4,FOXE1,GJB2,KCNJ1,MKS1,GLI3,DYNC2H1,CDH23,MYO7A,C5orf42,BEST1,IFT74,TRIM32,PDE6B,EYS,CEP290,DUOX2
GO Process	GO:0003008	System process	18	1942	0.7	1.23e-06	IMPG2,WFS1,MKKS,CNGB1,GUCY2D,BBS7,SLC26A4,USH2A,BBS1,OXTR,ABCA4,GJB2,KCNJ1,CDH23,MYO7A,BEST1,PDE6B,EYS
GO Process	GO:0007368	Determination of left/right symmetry	7	120	2023-05-01	2.33e-06	MKKS,BBS7,OFD1,AHI1,MKS1,DYNC2H1,IFT74
GO Process	GO:0048839	Inner ear development	8	198	1.34	2.33e-06	USH2A,AHI1,GJB2,MKS1,GLI3,CDH23,MYO7A,CEP290
GO Process	GO:0048598	Embryonic morphogenesis	11	571	2023-02-01	2.86e-06	MKKS,BBS7,TMEM107,AHI1,FOXE1,MKS1,GLI3,DYNC2H1,MYO7A,C5orf42,CEP290
GO Process	GO:0001894	Tissue homeostasis	8	219	2023-03-01	4.00e-06	MKKS,CNGB1,USH2A,BBS1,ABCA4,MKS1,CDH23,TRIM32
GO Process	GO:0048871	Multicellular organismal homeostasis	9	352	1.14	7.17e-06	WFS1,MKKS,CNGB1,USH2A,BBS1,ABCA4,MKS1,CDH23,TRIM32
GO Process	GO:0007605	Sensory perception of sound	7	153	2023-04-01	7.44e-06	WFS1,MKKS,SLC26A4,USH2A,GJB2,CDH23,MYO7A
GO Process	GO:0009584	Detection of visible light	5	48	1.75	2.00e-05	CNGB1,ABCA4,BEST1,PDE6B,EYS
GO Process	GO:0007423	Sensory organ development	10	563	0.98	2.48e-05	BBS7,USH2A,AHI1,GJB2,MKS1,GLI3,CDH23,MYO7A,PDE6B,CEP290
GO Process	GO:0007389	Pattern specification process	9	432	2023-05-01	3.31e-05	MKKS,BBS7,TMEM107,OFD1,AHI1,MKS1,GLI3,DYNC2H1,IFT74
GO Process	GO:0051179	Localization	26	5591	0.4	3.31e-05	MKKS,CNGB1,BBS7,SLC26A4,USH2A,TMEM107,BBS1,OXTR,OFD1,AHI1,ABCA4,BSND,FOXE1,GJB2,KCNJ1,MKS1,GLI3,SLC12A1,DYNC2H1,CDH23,MYO7A,C5orf42,TMEM67,BEST1,IFT74,CEP290
GO Process	GO:0048568	Embryonic organ development	9	448	2023-04-01	4.20e-05	MKKS,BBS7,TPO,AHI1,FOXE1,MKS1,GLI3,MYO7A,CEP290
GO Process	GO:0009790	Embryo development	12	1002	0.81	5.29e-05	MKKS,BBS7,TMEM107,TPO,AHI1,FOXE1,MKS1,GLI3,DYNC2H1,MYO7A,C5orf42,CEP290
GO Process	GO:0009581	Detection of external stimulus	6	131	2023-04-01	6.47e-05	MKKS,CNGB1,ABCA4,BEST1,PDE6B,EYS
GO Process	GO:0009582	Detection of abiotic stimulus	6	133	1.39	6.85e-05	MKKS,CNGB1,ABCA4,BEST1,PDE6B,EYS
GO Process	GO:0007224	Smoothened signaling pathway	5	72	1.58	0.00010	BBS7,EVC2,KIAA0586,MKS1,GLI3
GO Process	GO:0007507	Heart development	9	522	0.97	0.00013	MKKS,BBS7,OXTR,AHI1,MKS1,GLI3,DYNC2H1,C5orf42,IFT74
GO Process	GO:0060429	Epithelium development	12	1109	0.77	0.00014	MKKS,BBS7,USH2A,TMEM107,AHI1,FOXE1,MKS1,GLI3,MYO7A,C5orf42,IFT74,CEP290
GO Process	GO:0002009	Morphogenesis of an epithelium	8	435	1.0	0.00033	MKKS,BBS7,AHI1,FOXE1,MKS1,GLI3,C5orf42,CEP290
GO Process	GO:0060173	Limb development	6	181	1.26	0.00033	BBS7,TMEM107,MKS1,GLI3,DYNC2H1,C5orf42
GO Process	GO:0097711	Ciliary basal body-plasma membrane docking	5	95	1.46	0.00033	OFD1,AHI1,MKS1,TMEM67,CEP290
GO Process	GO:0048562	Embryonic organ morphogenesis	7	301	2023-01-01	0.00036	MKKS,BBS7,AHI1,FOXE1,GLI3,MYO7A,CEP290
GO Process	GO:0048856	Anatomical structure development	24	5402	0.38	0.00036	WFS1,MKKS,CNGB1,BBS7,USH2A,TMEM107,TPO,OXTR,OFD1,AHI1,FOXE1,GJB2,MKS1,GLI3,DYNC2H1,CDH23,MYO7A,C5orf42,IFT74,TRIM32,PDE6B,EYS,CEP290,DUOX2
GO Process	GO:0009888	Tissue development	14	1760	0.64	0.00037	MKKS,BBS7,USH2A,TMEM107,AHI1,FOXE1,GJB2,MKS1,GLI3,MYO7A,C5orf42,IFT74,EYS,CEP290
GO Process	GO:0022607	Cellular component assembly	16	2359	0.57	0.00038	MKKS,BBS7,TMEM107,BBS1,OFD1,KIAA0586,AHI1,GJB2,MKS1,DYNC2H1,CDH23,MYO7A,C5orf42,TMEM67,IFT74,CEP290
GO Process	GO:0007275	Multicellular organism development	23	5023	0.4	0.00043	WFS1,MKKS,CNGB1,BBS7,USH2A,TMEM107,TPO,OXTR,OFD1,AHI1,FOXE1,GJB2,MKS1,GLI3,DYNC2H1,CDH23,MYO7A,C5orf42,IFT74,TRIM32,PDE6B,CEP290,DUOX2
GO Process	GO:0035295	Tube development	10	851	0.81	0.00059	MKKS,BBS7,TMEM107,OXTR,AHI1,FOXE1,GJB2,MKS1,GLI3,CEP290
GO Process	GO:0042461	Photoreceptor cell development	4	47	1.67	0.00059	CNGB1,AHI1,MYO7A,CEP290
GO Process	GO:0061512	Protein localization to cilium	4	51	1.63	0.00077	TMEM107,BBS1,DYNC2H1,C5orf42
GO Process	GO:0048513	Animal organ development	18	3197	0.49	0.00078	WFS1,MKKS,BBS7,USH2A,TPO,OXTR,AHI1,FOXE1,GJB2,MKS1,GLI3,DYNC2H1,CDH23,MYO7A,C5orf42,IFT74,PDE6B,CEP290
GO Process	GO:0030326	Embryonic limb morphogenesis	5	127	1.33	0.00099	TMEM107,MKS1,GLI3,DYNC2H1,C5orf42
GO Process	GO:0048565	Digestive tract development	5	128	1.33	0.00099	BBS7,OXTR,AHI1,FOXE1,GLI3
GO Process	GO:0048731	System development	21	4426	0.41	0.00099	WFS1,MKKS,CNGB1,BBS7,USH2A,TMEM107,TPO,OXTR,AHI1,FOXE1,GJB2,MKS1,GLI3,DYNC2H1,CDH23,MYO7A,C5orf42,IFT74,TRIM32,PDE6B,CEP290
GO Process	GO:0060113	Inner ear receptor cell differentiation	4	56	1.59	0.00099	USH2A,MKS1,CDH23,MYO7A
GO Process	GO:0042592	Homeostatic process	13	1676	0.62	0.0010	WFS1,MKKS,CNGB1,SLC26A4,USH2A,BBS1,OXTR,ABCA4,MKS1,SLC12A1,CDH23,TRIM32,PDE6B
GO Process	GO:0042733	Embryonic digit morphogenesis	4	61	1.55	0.0012	TMEM107,MKS1,GLI3,C5orf42
GO Process	GO:0006590	Thyroid hormone generation	3	17	1.98	0.0013	TPO,FOXE1,DUOX2
GO Process	GO:0007603	Phototransduction, visible light	3	18	1.96	0.0014	CNGB1,ABCA4,PDE6B
GO Process	GO:0007399	Nervous system development	15	2371	0.54	0.0016	MKKS,CNGB1,BBS7,USH2A,TMEM107,OXTR,AHI1,MKS1,GLI3,DYNC2H1,CDH23,MYO7A,C5orf42,TRIM32,CEP290
GO Process	GO:0050908	Detection of light stimulus involved in visual perception	3	19	1.93	0.0016	CNGB1,BEST1,EYS
GO Process	GO:0060322	Head development	9	788	0.79	0.0018	MKKS,BBS7,OXTR,AHI1,MKS1,GLI3,DYNC2H1,C5orf42,CEP290
GO Process	GO:0030182	Neuron differentiation	10	1019	0.73	0.0019	CNGB1,USH2A,AHI1,MKS1,GLI3,DYNC2H1,CDH23,MYO7A,TRIM32,CEP290
GO Process	GO:0051640	Organelle localization	8	598	0.86	0.0019	MKKS,BBS7,OFD1,AHI1,MKS1,MYO7A,TMEM67,CEP290
GO Process	GO:0051904	Pigment granule transport	3	22	1.87	0.0021	MKKS,BBS7,MYO7A
GO Process	GO:0009416	Response to light stimulus	6	302	2023-03-01	0.0030	CNGB1,ABCA4,BEST1,TRIM32,PDE6B,EYS
GO Process	GO:0051877	Pigment granule aggregation in cell center	2	2	2.74	0.0031	MKKS,BBS7
GO Process	GO:0060562	Epithelial tube morphogenesis	6	307	2023-03-01	0.0032	MKKS,BBS7,AHI1,MKS1,GLI3,CEP290
GO Process	GO:0022400	Regulation of rhodopsin mediated signaling pathway	3	27	1.78	0.0034	CNGB1,GUCY2D,PDE6B
GO Process	GO:0051234	Establishment of localization	20	4479	0.39	0.0034	MKKS,CNGB1,BBS7,SLC26A4,USH2A,BBS1,OXTR,OFD1,AHI1,ABCA4,BSND,GJB2,KCNJ1,SLC12A1,DYNC2H1,CDH23,MYO7A,BEST1,IFT74,CEP290
GO Process	GO:0060021	Roof of mouth development	4	91	1.38	0.0040	BBS7,FOXE1,GLI3,C5orf42
GO Process	GO:0043473	Pigmentation	4	92	1.37	0.0041	MKKS,BBS7,GLI3,MYO7A
GO Process	GO:0060122	Inner ear receptor cell stereocilium organization	3	31	1.72	0.0047	MKS1,CDH23,MYO7A
GO Process	GO:1902476	Chloride transmembrane transport	4	103	1.32	0.0061	SLC26A4,BSND,SLC12A1,BEST1
GO Process	GO:0009887	Animal organ morphogenesis	9	967	0.7	0.0071	MKKS,BBS7,USH2A,AHI1,FOXE1,MKS1,GLI3,MYO7A,CEP290
GO Process	GO:0001654	Eye development	6	365	0.95	0.0073	BBS7,AHI1,GLI3,MYO7A,PDE6B,CEP290
GO Process	GO:0007420	Brain development	8	745	0.77	0.0073	MKKS,BBS7,OXTR,AHI1,GLI3,DYNC2H1,C5orf42,CEP290
GO Process	GO:0006810	Transport	19	4353	0.38	0.0083	MKKS,CNGB1,BBS7,SLC26A4,BBS1,OXTR,OFD1,AHI1,ABCA4,BSND,GJB2,KCNJ1,SLC12A1,DYNC2H1,CDH23,MYO7A,BEST1,IFT74,CEP290
GO Process	GO:0009653	Anatomical structure morphogenesis	13	2165	0.51	0.0096	MKKS,BBS7,USH2A,TMEM107,AHI1,FOXE1,MKS1,GLI3,DYNC2H1,CDH23,MYO7A,C5orf42,CEP290
GO Process	GO:0048666	Neuron development	8	827	0.72	0.0137	CNGB1,AHI1,MKS1,GLI3,CDH23,MYO7A,TRIM32,CEP290
GO Process	GO:0048546	Digestive tract morphogenesis	3	48	1.53	0.0138	BBS7,AHI1,GLI3
GO Process	GO:0050957	Equilibrioception	2	7	2.19	0.0143	CDH23,MYO7A
GO Process	GO:0016043	Cellular component organization	21	5447	0.32	0.0150	MKKS,CNGB1,BBS7,TMEM107,BBS1,OFD1,KIAA0586,AHI1,ABCA4,GJB2,MKS1,GLI3,SLC12A1,DYNC2H1,CDH23,MYO7A,C5orf42,TMEM67,IFT74,TRIM32,CEP290
GO Process	GO:0001822	Kidney development	5	271	1.0	0.0166	WFS1,AHI1,GLI3,C5orf42,CEP290
GO Process	GO:0048793	Pronephros development	2	8	2.13	0.0171	AHI1,CEP290
GO Process	GO:1904491	Protein localization to ciliary transition zone	2	8	2.13	0.0171	TMEM107,C5orf42
GO Process	GO:0048592	Eye morphogenesis	4	151	1.16	0.0207	AHI1,GLI3,MYO7A,CEP290
GO Process	GO:0001947	Heart looping	3	64	1.41	0.0278	MKKS,BBS7,AHI1
GO Process	GO:0055080	Cation homeostasis	7	712	0.73	0.0311	WFS1,CNGB1,SLC26A4,OXTR,SLC12A1,CDH23,PDE6B
GO Process	GO:0016056	Rhodopsin mediated signaling pathway	2	12	1.96	0.0318	CNGB1,PDE6B
GO Process	GO:0035845	Photoreceptor cell outer segment organization	2	12	1.96	0.0318	CNGB1,AHI1
GO Process	GO:0098771	Inorganic ion homeostasis	7	723	0.72	0.0330	WFS1,CNGB1,SLC26A4,OXTR,SLC12A1,CDH23,PDE6B
GO Process	GO:0071599	Otic vesicle development	2	15	1.86	0.0447	AHI1,CEP290
GO Process	GO:0051641	Cellular localization	14	2967	0.41	0.0477	MKKS,CNGB1,BBS7,TMEM107,BBS1,OFD1,AHI1,MKS1,DYNC2H1,MYO7A,C5orf42,TMEM67,IFT74,CEP290
GO Cellular Component
GO Component	GO:0005929	Cilium	22	637	1.27	1.13e-20	MKKS,CNGB1,GUCY2D,BBS7,USH2A,TMEM107,BBS1,EVC2,OFD1,KIAA0586,AHI1,ABCA4,MKS1,GLI3,DYNC2H1,MYO7A,C5orf42,TMEM67,IFT74,PDE6B,EYS,CEP290
GO Component	GO:0042995	Cell projection	28	2287	0.82	9.01e-17	IMPG2,WFS1,MKKS,CNGB1,GUCY2D,BBS7,SLC26A4,USH2A,TMEM107,BBS1,OXTR,EVC2,OFD1,KIAA0586,AHI1,ABCA4,GJB2,MKS1,GLI3,DYNC2H1,CDH23,MYO7A,C5orf42,TMEM67,IFT74,PDE6B,EYS,CEP290
GO Component	GO:0120025	Plasma membrane bounded cell projection	27	2193	0.83	4.77e-16	WFS1,MKKS,CNGB1,GUCY2D,BBS7,SLC26A4,USH2A,TMEM107,BBS1,OXTR,EVC2,OFD1,KIAA0586,AHI1,ABCA4,GJB2,MKS1,GLI3,DYNC2H1,CDH23,MYO7A,C5orf42,TMEM67,IFT74,PDE6B,EYS,CEP290
GO Component	GO:0097730	Non-motile cilium	11	160	1.57	3.40e-12	MKKS,CNGB1,GUCY2D,BBS7,USH2A,AHI1,ABCA4,MYO7A,PDE6B,EYS,CEP290
GO Component	GO:0035869	Ciliary transition zone	8	66	1.82	2.64e-10	USH2A,TMEM107,AHI1,MKS1,MYO7A,C5orf42,TMEM67,CEP290
GO Component	GO:0097733	Photoreceptor cell cilium	9	115	1.63	2.79e-10	CNGB1,GUCY2D,BBS7,USH2A,ABCA4,MYO7A,PDE6B,EYS,CEP290
GO Component	GO:0036064	Ciliary basal body	9	134	1.56	8.23e-10	MKKS,BBS7,USH2A,BBS1,OFD1,KIAA0586,AHI1,MKS1,CEP290
GO Component	GO:0036038	MKS complex	5	13	2.32	2.49e-08	TMEM107,AHI1,MKS1,TMEM67,CEP290
GO Component	GO:0001750	Photoreceptor outer segment	7	88	1.64	6.34e-08	CNGB1,GUCY2D,BBS7,ABCA4,MYO7A,PDE6B,EYS
GO Component	GO:0060170	Ciliary membrane	6	72	1.66	8.93e-07	CNGB1,GUCY2D,BBS7,BBS1,EVC2,TMEM67
GO Component	GO:0005815	Microtubule organizing center	12	761	0.93	9.63e-07	MKKS,BBS7,USH2A,BBS1,OFD1,KIAA0586,AHI1,MKS1,TMEM67,IFT74,EYS,CEP290
GO Component	GO:0098590	Plasma membrane region	14	1219	0.8	1.89e-06	CNGB1,GUCY2D,BBS7,SLC26A4,USH2A,BBS1,OXTR,EVC2,BSND,SLC12A1,MYO7A,TMEM67,BEST1,DUOX2
GO Component	GO:0005813	Centrosome	10	565	0.98	6.77e-06	MKKS,BBS7,BBS1,OFD1,KIAA0586,AHI1,MKS1,TMEM67,IFT74,CEP290
GO Component	GO:0015630	Microtubule cytoskeleton	13	1219	0.76	1.50e-05	MKKS,BBS7,USH2A,BBS1,OFD1,KIAA0586,AHI1,MKS1,DYNC2H1,TMEM67,IFT74,EYS,CEP290
GO Component	GO:0031253	Cell projection membrane	8	338	2023-11-01	1.81e-05	CNGB1,GUCY2D,BBS7,SLC26A4,USH2A,BBS1,EVC2,TMEM67
GO Component	GO:0005856	Cytoskeleton	16	2221	0.59	6.09e-05	MKKS,BBS7,USH2A,BBS1,EVC2,OFD1,KIAA0586,AHI1,MKS1,GLI3,DYNC2H1,MYO7A,TMEM67,IFT74,EYS,CEP290
GO Component	GO:0043005	Neuron projection	12	1366	0.68	0.00034	WFS1,MKKS,CNGB1,GUCY2D,BBS7,USH2A,ABCA4,CDH23,MYO7A,PDE6B,EYS,CEP290
GO Component	GO:0032421	Stereocilium bundle	4	58	1.57	0.00044	MKKS,USH2A,CDH23,MYO7A
GO Component	GO:0005814	Centriole	5	142	1.28	0.00059	OFD1,KIAA0586,AHI1,MKS1,CEP290
GO Component	GO:0045177	Apical part of cell	7	420	0.96	0.00087	SLC26A4,USH2A,OXTR,SLC12A1,DYNC2H1,MYO7A,DUOX2
GO Component	GO:0098862	Cluster of actin-based cell projections	5	158	1.24	0.00088	MKKS,SLC26A4,USH2A,CDH23,MYO7A
GO Component	GO:0097381	Photoreceptor disc membrane	3	24	1.83	0.0012	GUCY2D,ABCA4,PDE6B
GO Component	GO:0032991	Protein-containing complex	21	5073	0.35	0.0028	IMPG2,CNGB1,BBS7,USH2A,TMEM107,BBS1,EVC2,AHI1,BSND,GJB2,KCNJ1,MKS1,GLI3,DYNC2H1,CDH23,MYO7A,TMEM67,BEST1,IFT74,CEP290,DUOX2
GO Component	GO:0016324	Apical plasma membrane	6	350	0.97	0.0029	SLC26A4,USH2A,OXTR,SLC12A1,MYO7A,DUOX2
GO Component	GO:0032391	Photoreceptor connecting cilium	3	38	1.63	0.0038	USH2A,MYO7A,CEP290
GO Component	GO:0005930	Axoneme	4	117	1.27	0.0044	BBS7,BBS1,GLI3,DYNC2H1
GO Component	GO:0005886	Plasma membrane	21	5314	0.33	0.0049	CNGB1,GUCY2D,BBS7,SLC26A4,USH2A,BBS1,TPO,OXTR,EVC2,ABCA4,BSND,GJB2,KCNJ1,SLC12A1,DYNC2H1,CDH23,MYO7A,TMEM67,BEST1,PDE6B,DUOX2
GO Component	GO:0033165	Interphotoreceptor matrix	2	6	2.26	0.0052	IMPG2,EYS
GO Component	GO:0097542	Ciliary tip	3	46	1.55	0.0054	GLI3,DYNC2H1,IFT74
GO Component	GO:0002139	Stereocilia coupling link	2	7	2.19	0.0062	USH2A,MYO7A
GO Component	GO:0016020	Membrane	28	9072	0.22	0.0062	IMPG2,WFS1,CNGB1,GUCY2D,BBS7,SLC26A4,USH2A,TMEM107,BBS1,TPO,OXTR,EVC2,OFD1,ABCA4,BSND,GJB2,KCNJ1,MKS1,SLC12A1,DYNC2H1,CDH23,MYO7A,C5orf42,TMEM67,BEST1,PDE6B,CEP290,DUOX2
GO Component	GO:0032420	Stereocilium	3	53	1.49	0.0071	USH2A,CDH23,MYO7A
GO Component	GO:0034464	BBSome	2	8	2.13	0.0071	BBS7,BBS1
GO Component	GO:0001917	Photoreceptor inner segment	3	57	1.46	0.0083	USH2A,KIAA0586,MYO7A
GO Component	GO:0016021	Integral component of membrane	20	5181	0.32	0.0094	IMPG2,WFS1,CNGB1,GUCY2D,SLC26A4,USH2A,TMEM107,TPO,OXTR,EVC2,ABCA4,BSND,GJB2,KCNJ1,SLC12A1,CDH23,C5orf42,TMEM67,BEST1,DUOX2
GO Component	GO:0098858	Actin-based cell projection	4	214	2023-01-01	0.0275	USH2A,OXTR,CDH23,MYO7A
GO Component	GO:0043232	Intracellular non-membrane-bounded organelle	18	4880	0.3	0.0425	MKKS,BBS7,USH2A,BBS1,EVC2,OFD1,KIAA0586,AHI1,FOXE1,MKS1,GLI3,DYNC2H1,MYO7A,TMEM67,IFT74,TRIM32,EYS,CEP290
Reactome
Reactome	HSA-5617833	Cilium Assembly	11	197	1.48	1.52e-10	MKKS,CNGB1,BBS7,BBS1,OFD1,AHI1,MKS1,DYNC2H1,TMEM67,IFT74,CEP290
Reactome	HSA-2187338	Visual phototransduction	5	99	1.44	0.00083	CNGB1,GUCY2D,ABCA4,MYO7A,PDE6B
Reactome	HSA-5620912	Anchoring of the basal body to the plasma membrane	5	97	1.45	0.00083	OFD1,AHI1,MKS1,TMEM67,CEP290
Reactome	HSA-5620920	Cargo trafficking to the periciliary membrane	4	50	1.64	0.0012	MKKS,CNGB1,BBS7,BBS1
Reactome	HSA-5358351	Signaling by Hedgehog	5	146	1.27	0.0029	EVC2,OFD1,MKS1,GLI3,DYNC2H1
Reactome	HSA-5620922	BBSome-mediated cargo-targeting to cilium	3	22	1.87	0.0039	MKKS,BBS7,BBS1
Reactome	HSA-2514859	Inactivation, recovery and regulation of the phototransduction cascade	3	33	1.69	0.0106	CNGB1,GUCY2D,PDE6B
Reactome	HSA-5610787	Hedgehog off state	4	110	2023-03-01	0.0120	OFD1,MKS1,GLI3,DYNC2H1
Reactome	HSA-209968	Thyroxine biosynthesis	2	8	2.13	0.0289	TPO,DUOX2
Reactome	HSA-2485179	Activation of the phototransduction cascade	2	11	1.99	0.0457	CNGB1,PDE6B

## Sheet: Enrichment subnetwork2 shared
#category	term ID	term description	observed gene count	background gene count	strength	false discovery rate	matching proteins in your network (labels)
GO Biological Process
GO Process	GO:0006259	DNA metabolic process	17	750	2023-01-01	2.26e-11	HERC2,EP300,NBN,TINF2,ATM,TERT,FANCI,MRE11A,PURA,ATR,VCP,ATRX,FANCG,BRCA2,FANCA,BRCA1,RECQL4
GO Process	GO:0006725	Cellular aromatic compound metabolic process	26	2882	0.7	2.26e-11	HERC2,EP300,NBN,TINF2,ATM,MITF,TERT,FANCI,MRE11A,PURA,ATR,OCA2,VCP,PARK2,PTEN,ATRX,AR,FANCG,BRCA2,PDX1,FANCA,ELP4,PAX6,BRCA1,LARP7,RECQL4
GO Process	GO:0090304	Nucleic acid metabolic process	24	2178	0.79	2.26e-11	HERC2,EP300,NBN,TINF2,ATM,MITF,TERT,FANCI,MRE11A,PURA,ATR,VCP,PTEN,ATRX,AR,FANCG,BRCA2,PDX1,FANCA,ELP4,PAX6,BRCA1,LARP7,RECQL4
GO Process	GO:1901360	Organic cyclic compound metabolic process	26	3118	0.67	1.01e-10	HERC2,EP300,NBN,TINF2,ATM,MITF,TERT,FANCI,MRE11A,PURA,ATR,OCA2,VCP,PARK2,PTEN,ATRX,AR,FANCG,BRCA2,PDX1,FANCA,ELP4,PAX6,BRCA1,LARP7,RECQL4
GO Process	GO:0006281	DNA repair	14	522	1.18	3.89e-10	HERC2,EP300,NBN,ATM,FANCI,MRE11A,ATR,VCP,ATRX,FANCG,BRCA2,FANCA,BRCA1,RECQL4
GO Process	GO:0070198	Protein localization to chromosome, telomeric region	6	16	2.32	2.42e-09	TINF2,ATM,TERT,ATR,ATRX,BRCA2
GO Process	GO:0045935	Positive regulation of nucleobase-containing compound metabolic process	20	1927	0.76	8.50e-09	PHOX2B,EP300,NBN,ATM,MITF,TERT,MRE11A,ATR,VCP,PARK2,ATRX,AR,BRCA2,PDX1,BRPF1,PAX6,GDNF,BRCA1,LARP7,WWOX
GO Process	GO:0000723	Telomere maintenance	8	112	2023-06-01	3.73e-08	NBN,TINF2,ATM,TERT,MRE11A,ATR,BRCA2,RECQL4
GO Process	GO:0006260	DNA replication	9	205	1.39	9.44e-08	NBN,ATM,MRE11A,PURA,ATR,ATRX,BRCA2,BRCA1,RECQL4
GO Process	GO:0019219	Regulation of nucleobase-containing compound metabolic process	25	3982	0.55	9.78e-08	PHOX2B,EP300,NBN,TINF2,ATM,MITF,TERT,MRE11A,PURA,ATR,VCP,PARK2,PTEN,ATRX,AR,BRCA2,PDX1,BRPF1,FANCA,ELP4,PAX6,GDNF,BRCA1,LARP7,WWOX
GO Process	GO:0044260	Cellular macromolecule metabolic process	27	4976	0.48	1.84e-07	HERC2,EP300,NBN,TINF2,ATM,MITF,TERT,FANCI,MRE11A,PURA,ATR,VCP,PARK2,PTEN,ATRX,AR,FANCG,BRCA2,PDX1,BRPF1,FANCA,ELP4,PAX6,GDNF,BRCA1,LARP7,RECQL4
GO Process	GO:0034645	Cellular macromolecule biosynthetic process	17	1592	0.78	2.64e-07	NBN,ATM,MITF,TERT,MRE11A,PURA,ATR,VCP,PTEN,ATRX,AR,BRCA2,PDX1,ELP4,PAX6,BRCA1,RECQL4
GO Process	GO:0051173	Positive regulation of nitrogen compound metabolic process	22	3239	0.58	7.36e-07	PHOX2B,EP300,NBN,ATM,MITF,TERT,FANCI,MRE11A,ATR,VCP,PARK2,PTEN,ATRX,AR,BRCA2,PDX1,BRPF1,PAX6,GDNF,BRCA1,LARP7,WWOX
GO Process	GO:0033554	Cellular response to stress	17	1725	0.74	7.68e-07	HERC2,EP300,NBN,ATM,TERT,FANCI,MRE11A,ATR,VCP,PARK2,PTEN,ATRX,FANCG,BRCA2,FANCA,BRCA1,RECQL4
GO Process	GO:1901796	Regulation of signal transduction by p53 class mediator	8	182	1.39	7.74e-07	EP300,NBN,ATM,MRE11A,ATR,PARK2,BRPF1,BRCA1
GO Process	GO:0031328	Positive regulation of cellular biosynthetic process	18	2005	0.7	7.75e-07	PHOX2B,EP300,ATM,MITF,TERT,ATR,VCP,PARK2,ATRX,AR,BRCA2,PDX1,BRPF1,PAX6,GDNF,BRCA1,LARP7,WWOX
GO Process	GO:0031326	Regulation of cellular biosynthetic process	24	4125	0.51	1.16e-06	PHOX2B,EP300,NBN,TINF2,ATM,MITF,TERT,PURA,ATR,VCP,PARK2,PTEN,ATRX,AR,BRCA2,PDX1,BRPF1,FANCA,ELP4,PAX6,GDNF,BRCA1,LARP7,WWOX
GO Process	GO:0070200	Establishment of protein localization to telomere	4	7	2023-05-02	1.37e-06	ATM,TERT,ATR,BRCA2
GO Process	GO:0072331	Signal transduction by p53 class mediator	7	123	2023-05-01	1.37e-06	EP300,NBN,ATM,ATRX,BRCA2,BRCA1,WWOX
GO Process	GO:0006302	Double-strand break repair	8	204	1.34	1.38e-06	HERC2,NBN,ATM,MRE11A,VCP,BRCA2,BRCA1,RECQL4
GO Process	GO:0031325	Positive regulation of cellular metabolic process	22	3413	0.56	1.38e-06	PHOX2B,EP300,NBN,ATM,MITF,TERT,FANCI,MRE11A,ATR,VCP,PARK2,PTEN,ATRX,AR,BRCA2,PDX1,BRPF1,PAX6,GDNF,BRCA1,LARP7,WWOX
GO Process	GO:0045893	Positive regulation of transcription, dna-templated	16	1587	0.75	1.43e-06	PHOX2B,EP300,ATM,MITF,TERT,PARK2,ATRX,AR,BRCA2,PDX1,BRPF1,PAX6,GDNF,BRCA1,LARP7,WWOX
GO Process	GO:2000112	Regulation of cellular macromolecule biosynthetic process	23	3878	0.52	1.92e-06	PHOX2B,EP300,NBN,TINF2,ATM,MITF,TERT,PURA,ATR,PARK2,PTEN,ATRX,AR,BRCA2,PDX1,BRPF1,FANCA,ELP4,PAX6,GDNF,BRCA1,LARP7,WWOX
GO Process	GO:0010557	Positive regulation of macromolecule biosynthetic process	17	1906	0.7	2.12e-06	PHOX2B,EP300,ATM,MITF,TERT,ATR,PARK2,ATRX,AR,BRCA2,PDX1,BRPF1,PAX6,GDNF,BRCA1,LARP7,WWOX
GO Process	GO:0010604	Positive regulation of macromolecule metabolic process	22	3600	0.53	2.91e-06	PHOX2B,EP300,NBN,ATM,MITF,TERT,FANCI,MRE11A,ATR,VCP,PARK2,PTEN,ATRX,AR,BRCA2,PDX1,BRPF1,PAX6,GDNF,BRCA1,LARP7,WWOX
GO Process	GO:0030330	DNA damage response, signal transduction by p53 class mediator	6	82	1.61	3.41e-06	EP300,NBN,ATM,ATRX,BRCA2,BRCA1
GO Process	GO:0032204	Regulation of telomere maintenance	6	83	1.61	3.55e-06	NBN,TINF2,ATM,MRE11A,ATR,ATRX
GO Process	GO:0032502	Developmental process	27	5841	0.41	3.55e-06	PHOX2B,HERC2,EP300,NBN,ATM,MITF,TERT,TUBB3,PURA,ATR,OCA2,PARK2,ASPM,PTEN,ATRX,AR,FANCG,BRCA2,PDX1,FANCA,PAX6,GDNF,BRCA1,LARP7,TRPM1,WWOX,RECQL4
GO Process	GO:0045944	Positive regulation of transcription by rna polymerase ii	14	1253	0.8	4.16e-06	PHOX2B,EP300,ATM,MITF,TERT,PARK2,ATRX,AR,PDX1,PAX6,GDNF,BRCA1,LARP7,WWOX
GO Process	GO:0010628	Positive regulation of gene expression	18	2337	0.63	4.56e-06	PHOX2B,EP300,ATM,MITF,TERT,MRE11A,PARK2,PTEN,ATRX,AR,BRCA2,PDX1,BRPF1,PAX6,GDNF,BRCA1,LARP7,WWOX
GO Process	GO:0016043	Cellular component organization	26	5447	0.43	4.72e-06	PHOX2B,EP300,NBN,TINF2,ATM,MITF,TERT,TUBB3,MRE11A,PURA,ATR,VCP,PARK2,ASPM,PTEN,ATRX,FANCG,BRCA2,BRPF1,FANCA,PRF1,PAX6,GDNF,BRCA1,TRPM1,RECQL4
GO Process	GO:0045934	Negative regulation of nucleobase-containing compound metabolic process	15	1528	0.74	5.29e-06	EP300,NBN,TINF2,ATM,MITF,TERT,PURA,PARK2,ATRX,AR,PDX1,PAX6,GDNF,BRCA1,WWOX
GO Process	GO:0048869	Cellular developmental process	22	3757	0.52	5.30e-06	PHOX2B,EP300,ATM,MITF,TERT,TUBB3,PURA,ATR,OCA2,PARK2,ASPM,PTEN,ATRX,AR,FANCG,BRCA2,PDX1,PAX6,GDNF,LARP7,TRPM1,WWOX
GO Process	GO:0060249	Anatomical structure homeostasis	9	380	2023-12-01	5.33e-06	NBN,TINF2,ATM,TERT,MRE11A,ATR,PARK2,BRCA2,RECQL4
GO Process	GO:0006996	Organelle organization	21	3450	0.53	7.36e-06	EP300,NBN,TINF2,ATM,TERT,TUBB3,MRE11A,PURA,ATR,VCP,PARK2,ASPM,PTEN,ATRX,FANCG,BRCA2,BRPF1,FANCA,PAX6,BRCA1,RECQL4
GO Process	GO:0048232	Male gamete generation	10	543	2023-01-01	7.36e-06	HERC2,ATM,OCA2,ASPM,ATRX,AR,FANCG,BRCA2,FANCA,LARP7
GO Process	GO:0048522	Positive regulation of cellular process	26	5579	0.42	7.36e-06	PHOX2B,EP300,NBN,ATM,MITF,PIEZO1,TERT,FANCI,MRE11A,PURA,ATR,VCP,PARK2,ASPM,PTEN,ATRX,AR,BRCA2,PDX1,BRPF1,PRF1,PAX6,GDNF,BRCA1,LARP7,WWOX
GO Process	GO:0000724	Double-strand break repair via homologous recombination	6	102	1.52	8.52e-06	NBN,ATM,MRE11A,BRCA2,BRCA1,RECQL4
GO Process	GO:0032206	Positive regulation of telomere maintenance	5	51	1.74	1.07e-05	NBN,ATM,MRE11A,ATR,ATRX
GO Process	GO:0042127	Regulation of cell population proliferation	15	1642	0.71	1.07e-05	PHOX2B,TINF2,ATM,MITF,TERT,PURA,ASPM,PTEN,AR,BRCA2,PDX1,FANCA,PAX6,GDNF,BRCA1
GO Process	GO:0051171	Regulation of nitrogen compound metabolic process	26	5836	0.4	1.63e-05	PHOX2B,EP300,NBN,TINF2,ATM,MITF,TERT,FANCI,MRE11A,PURA,ATR,VCP,PARK2,PTEN,ATRX,AR,BRCA2,PDX1,BRPF1,FANCA,ELP4,PAX6,GDNF,BRCA1,LARP7,WWOX
GO Process	GO:0008406	Gonad development	7	205	1.28	1.72e-05	ATM,ASPM,ATRX,AR,FANCG,BRCA2,FANCA
GO Process	GO:0044249	Cellular biosynthetic process	18	2611	0.59	1.79e-05	NBN,ATM,MITF,TERT,MRE11A,PURA,ATR,OCA2,VCP,PTEN,ATRX,AR,BRCA2,PDX1,ELP4,PAX6,BRCA1,RECQL4
GO Process	GO:0048856	Anatomical structure development	25	5402	0.41	1.89e-05	PHOX2B,EP300,NBN,ATM,MITF,TERT,TUBB3,PURA,ATR,OCA2,PARK2,ASPM,PTEN,ATRX,AR,FANCG,BRCA2,PDX1,FANCA,PAX6,GDNF,BRCA1,TRPM1,WWOX,RECQL4
GO Process	GO:0030154	Cell differentiation	21	3702	0.5	1.94e-05	PHOX2B,EP300,ATM,MITF,TERT,TUBB3,PURA,OCA2,PARK2,ASPM,PTEN,ATRX,AR,FANCG,BRCA2,PDX1,PAX6,GDNF,LARP7,TRPM1,WWOX
GO Process	GO:0031324	Negative regulation of cellular metabolic process	18	2630	0.58	1.94e-05	EP300,NBN,TINF2,ATM,MITF,TERT,PURA,ATR,PARK2,PTEN,ATRX,AR,BRCA2,PDX1,PAX6,GDNF,BRCA1,WWOX
GO Process	GO:0048609	Multicellular organismal reproductive process	11	807	0.88	2.00e-05	HERC2,ATM,OCA2,ASPM,PTEN,ATRX,AR,FANCG,BRCA2,FANCA,LARP7
GO Process	GO:0010948	Negative regulation of cell cycle process	8	328	1.13	2.04e-05	PHOX2B,EP300,NBN,ATM,MRE11A,PTEN,ATRX,BRCA1
GO Process	GO:0019953	Sexual reproduction	11	810	0.88	2.04e-05	HERC2,ATM,OCA2,ASPM,PTEN,ATRX,AR,FANCG,BRCA2,FANCA,LARP7
GO Process	GO:0007275	Multicellular organism development	24	5023	0.43	2.32e-05	PHOX2B,EP300,NBN,ATM,MITF,TERT,TUBB3,PURA,ATR,PARK2,ASPM,PTEN,ATRX,AR,FANCG,BRCA2,PDX1,FANCA,PAX6,GDNF,BRCA1,TRPM1,WWOX,RECQL4
GO Process	GO:0051321	Meiotic cell cycle	7	220	1.25	2.32e-05	NBN,ATM,MRE11A,ASPM,ATRX,BRCA2,FANCA
GO Process	GO:0051716	Cellular response to stimulus	27	6489	0.37	2.32e-05	PHOX2B,HERC2,EP300,NBN,ATM,MITF,PIEZO1,TERT,FANCI,TUBB3,MRE11A,ATR,VCP,PARK2,PTEN,ATRX,AR,FANCG,BRCA2,PDX1,FANCA,PAX6,GDNF,BRCA1,TRPM1,WWOX,RECQL4
GO Process	GO:0006355	Regulation of transcription, dna-templated	20	3388	0.52	2.33e-05	PHOX2B,EP300,ATM,MITF,TERT,PURA,PARK2,PTEN,ATRX,AR,BRCA2,PDX1,BRPF1,FANCA,ELP4,PAX6,GDNF,BRCA1,LARP7,WWOX
GO Process	GO:0000729	DNA double-strand break processing	4	23	1.99	2.49e-05	NBN,ATM,MRE11A,BRCA1
GO Process	GO:0080090	Regulation of primary metabolic process	26	6032	0.38	2.69e-05	PHOX2B,EP300,NBN,TINF2,ATM,MITF,TERT,FANCI,MRE11A,PURA,ATR,VCP,PARK2,PTEN,ATRX,AR,BRCA2,PDX1,BRPF1,FANCA,ELP4,PAX6,GDNF,BRCA1,LARP7,WWOX
GO Process	GO:1901576	Organic substance biosynthetic process	18	2734	0.57	2.93e-05	NBN,ATM,MITF,TERT,MRE11A,PURA,ATR,OCA2,VCP,PTEN,ATRX,AR,BRCA2,PDX1,ELP4,PAX6,BRCA1,RECQL4
GO Process	GO:0051276	Chromosome organization	12	1066	0.8	2.99e-05	EP300,NBN,TINF2,ATM,TERT,MRE11A,PURA,ATR,ATRX,BRCA2,BRPF1,RECQL4
GO Process	GO:0000077	DNA damage checkpoint	6	140	1.38	3.28e-05	EP300,NBN,ATM,MRE11A,ATR,BRCA1
GO Process	GO:0006950	Response to stress	20	3485	0.51	3.29e-05	HERC2,EP300,NBN,ATM,TERT,FANCI,MRE11A,ATR,VCP,PARK2,PTEN,ATRX,FANCG,BRCA2,PDX1,FANCA,PRF1,PAX6,BRCA1,RECQL4
GO Process	GO:0007049	Cell cycle	13	1313	0.74	3.29e-05	EP300,NBN,ATM,FANCI,TUBB3,MRE11A,VCP,ASPM,ATRX,BRCA2,FANCA,PAX6,BRCA1
GO Process	GO:0007346	Regulation of mitotic cell cycle	10	676	0.92	3.29e-05	PHOX2B,EP300,NBN,ATM,TERT,MRE11A,PTEN,ATRX,BRCA2,BRCA1
GO Process	GO:0006303	Double-strand break repair via nonhomologous end joining	5	74	1.58	4.03e-05	HERC2,NBN,ATM,MRE11A,BRCA1
GO Process	GO:0006357	Regulation of transcription by rna polymerase ii	16	2172	0.61	4.03e-05	PHOX2B,EP300,ATM,MITF,TERT,PURA,PARK2,ATRX,AR,PDX1,ELP4,PAX6,GDNF,BRCA1,LARP7,WWOX
GO Process	GO:0097193	Intrinsic apoptotic signaling pathway	6	151	1.35	4.59e-05	EP300,NBN,ATM,BRCA2,BRCA1,WWOX
GO Process	GO:0031323	Regulation of cellular metabolic process	26	6239	0.37	4.68e-05	PHOX2B,EP300,NBN,TINF2,ATM,MITF,TERT,FANCI,MRE11A,PURA,ATR,VCP,PARK2,PTEN,ATRX,AR,BRCA2,PDX1,BRPF1,FANCA,ELP4,PAX6,GDNF,BRCA1,LARP7,WWOX
GO Process	GO:0048468	Cell development	14	1629	0.68	4.75e-05	PHOX2B,EP300,ATM,TUBB3,OCA2,ASPM,PTEN,ATRX,AR,FANCG,BRCA2,PAX6,GDNF,TRPM1
GO Process	GO:0010605	Negative regulation of macromolecule metabolic process	18	2875	0.54	5.18e-05	EP300,NBN,TINF2,ATM,MITF,TERT,PURA,ATR,PARK2,PTEN,ATRX,AR,BRCA2,PDX1,PAX6,GDNF,BRCA1,WWOX
GO Process	GO:0044818	Mitotic g2/m transition checkpoint	4	30	1.87	5.18e-05	NBN,ATM,MRE11A,BRCA1
GO Process	GO:0048589	Developmental growth	8	389	2023-06-01	5.18e-05	EP300,NBN,ATM,ASPM,PTEN,ATRX,AR,BRCA2
GO Process	GO:0022414	Reproductive process	13	1400	0.72	5.68e-05	HERC2,NBN,ATM,MRE11A,OCA2,ASPM,PTEN,ATRX,AR,FANCG,BRCA2,FANCA,LARP7
GO Process	GO:0006807	Nitrogen compound metabolic process	27	6852	0.34	5.71e-05	HERC2,EP300,NBN,TINF2,ATM,MITF,TERT,FANCI,MRE11A,PURA,ATR,VCP,PARK2,PTEN,ATRX,AR,FANCG,BRCA2,PDX1,BRPF1,FANCA,ELP4,PAX6,GDNF,BRCA1,LARP7,RECQL4
GO Process	GO:0065008	Regulation of biological quality	21	4042	0.46	5.77e-05	PHOX2B,EP300,NBN,TINF2,ATM,PIEZO1,TERT,MRE11A,ATR,VCP,PARK2,ASPM,PTEN,ATRX,AR,BRCA2,PDX1,PAX6,GDNF,TRPM1,RECQL4
GO Process	GO:2001236	Regulation of extrinsic apoptotic signaling pathway	6	161	1.32	5.77e-05	TERT,PTEN,AR,GDNF,BRCA1,WWOX
GO Process	GO:0031572	G2 DNA damage checkpoint	4	32	1.84	5.89e-05	NBN,ATM,MRE11A,BRCA1
GO Process	GO:0003006	Developmental process involved in reproduction	11	945	0.81	6.03e-05	HERC2,ATM,OCA2,ASPM,PTEN,ATRX,AR,FANCG,BRCA2,FANCA,LARP7
GO Process	GO:1903046	Meiotic cell cycle process	6	165	1.31	6.38e-05	ATM,MRE11A,ASPM,ATRX,BRCA2,FANCA
GO Process	GO:2001233	Regulation of apoptotic signaling pathway	8	409	2023-04-01	6.64e-05	TERT,PARK2,PTEN,AR,PDX1,GDNF,BRCA1,WWOX
GO Process	GO:0045786	Negative regulation of cell cycle	9	571	0.95	6.84e-05	PHOX2B,EP300,NBN,ATM,MRE11A,ATR,PTEN,ATRX,BRCA1
GO Process	GO:0032501	Multicellular organismal process	27	6933	0.34	6.86e-05	PHOX2B,HERC2,EP300,NBN,ATM,MITF,TERT,TUBB3,PURA,ATR,OCA2,PARK2,ASPM,PTEN,ATRX,AR,FANCG,BRCA2,PDX1,FANCA,PAX6,GDNF,BRCA1,LARP7,TRPM1,WWOX,RECQL4
GO Process	GO:0060255	Regulation of macromolecule metabolic process	26	6407	0.36	6.95e-05	PHOX2B,EP300,NBN,TINF2,ATM,MITF,TERT,FANCI,MRE11A,PURA,ATR,VCP,PARK2,PTEN,ATRX,AR,BRCA2,PDX1,BRPF1,FANCA,ELP4,PAX6,GDNF,BRCA1,LARP7,WWOX
GO Process	GO:0010564	Regulation of cell cycle process	10	760	0.87	7.12e-05	PHOX2B,EP300,NBN,ATM,TERT,MRE11A,PTEN,ATRX,BRCA2,BRCA1
GO Process	GO:0044237	Cellular metabolic process	28	7513	0.32	7.12e-05	HERC2,EP300,NBN,TINF2,ATM,MITF,TERT,FANCI,MRE11A,PURA,ATR,OCA2,VCP,PARK2,PTEN,ATRX,AR,FANCG,BRCA2,PDX1,BRPF1,FANCA,ELP4,PAX6,GDNF,BRCA1,LARP7,RECQL4
GO Process	GO:1901990	Regulation of mitotic cell cycle phase transition	8	416	2023-03-01	7.13e-05	PHOX2B,EP300,NBN,ATM,TERT,MRE11A,PTEN,BRCA1
GO Process	GO:0022402	Cell cycle process	11	976	0.8	7.46e-05	EP300,NBN,ATM,MRE11A,VCP,ASPM,ATRX,BRCA2,FANCA,PAX6,BRCA1
GO Process	GO:0048608	Reproductive structure development	8	420	2023-03-01	7.46e-05	ATM,ASPM,PTEN,ATRX,AR,FANCG,BRCA2,FANCA
GO Process	GO:2000113	Negative regulation of cellular macromolecule biosynthetic process	13	1470	0.69	8.23e-05	EP300,TINF2,MITF,PURA,ATR,PARK2,ATRX,AR,BRCA2,PDX1,PAX6,BRCA1,WWOX
GO Process	GO:0051726	Regulation of cell cycle	12	1230	0.74	8.99e-05	PHOX2B,EP300,NBN,ATM,TERT,MRE11A,ATR,ASPM,PTEN,ATRX,BRCA2,BRCA1
GO Process	GO:2001252	Positive regulation of chromosome organization	6	184	1.26	0.00010	NBN,ATM,MRE11A,ATR,ATRX,BRCA1
GO Process	GO:0008152	Metabolic process	29	8298	0.29	0.00012	HERC2,EP300,NBN,TINF2,ATM,MITF,TERT,FANCI,MRE11A,PURA,ATR,OCA2,VCP,PARK2,PTEN,ATRX,AR,FANCG,BRCA2,PDX1,BRPF1,FANCA,ELP4,PAX6,GDNF,BRCA1,LARP7,WWOX,RECQL4
GO Process	GO:0045930	Negative regulation of mitotic cell cycle	7	308	2023-01-01	0.00012	EP300,NBN,ATM,MRE11A,PTEN,ATRX,BRCA1
GO Process	GO:0051172	Negative regulation of nitrogen compound metabolic process	16	2429	0.57	0.00013	EP300,NBN,TINF2,ATM,MITF,TERT,PURA,PARK2,PTEN,ATRX,AR,PDX1,PAX6,GDNF,BRCA1,WWOX
GO Process	GO:0071704	Organic substance metabolic process	28	7755	0.31	0.00013	HERC2,EP300,NBN,TINF2,ATM,MITF,TERT,FANCI,MRE11A,PURA,ATR,OCA2,VCP,PARK2,PTEN,ATRX,AR,FANCG,BRCA2,PDX1,BRPF1,FANCA,ELP4,PAX6,GDNF,BRCA1,LARP7,RECQL4
GO Process	GO:0032508	DNA duplex unwinding	5	106	1.42	0.00015	NBN,MRE11A,PURA,ATRX,RECQL4
GO Process	GO:0051054	Positive regulation of dna metabolic process	6	200	1.22	0.00015	NBN,ATM,MRE11A,ATR,ATRX,BRCA1
GO Process	GO:0031399	Regulation of protein modification process	14	1870	0.62	0.00017	EP300,NBN,TINF2,ATM,FANCI,MRE11A,VCP,PARK2,PTEN,ATRX,AR,ELP4,PAX6,BRCA1
GO Process	GO:0044238	Primary metabolic process	27	7332	0.31	0.00020	HERC2,EP300,NBN,TINF2,ATM,MITF,TERT,FANCI,MRE11A,PURA,ATR,VCP,PARK2,PTEN,ATRX,AR,FANCG,BRCA2,PDX1,BRPF1,FANCA,ELP4,PAX6,GDNF,BRCA1,LARP7,RECQL4
GO Process	GO:0048731	System development	21	4426	0.42	0.00021	PHOX2B,EP300,NBN,ATM,MITF,TERT,TUBB3,PURA,PARK2,ASPM,PTEN,ATRX,AR,FANCG,BRCA2,PDX1,FANCA,PAX6,GDNF,TRPM1,WWOX
GO Process	GO:0048523	Negative regulation of cellular process	22	4874	0.4	0.00022	PHOX2B,EP300,NBN,TINF2,ATM,MITF,TERT,MRE11A,PURA,ATR,VCP,PARK2,ASPM,PTEN,ATRX,AR,BRCA2,PDX1,PAX6,GDNF,BRCA1,WWOX
GO Process	GO:0006261	DNA-dependent DNA replication	5	119	1.37	0.00024	MRE11A,PURA,ATRX,BRCA2,RECQL4
GO Process	GO:1901991	Negative regulation of mitotic cell cycle phase transition	6	219	1.19	0.00024	EP300,NBN,ATM,MRE11A,PTEN,BRCA1
GO Process	GO:0000278	Mitotic cell cycle	9	695	0.86	0.00026	EP300,NBN,ATM,TUBB3,MRE11A,VCP,BRCA2,PAX6,BRCA1
GO Process	GO:0008285	Negative regulation of cell population proliferation	9	696	0.86	0.00026	PHOX2B,TINF2,ATM,TERT,PTEN,AR,BRCA2,PDX1,PAX6
GO Process	GO:0090399	Replicative senescence	3	13	2023-11-02	0.00026	ATM,TERT,ATR
GO Process	GO:0009628	Response to abiotic stimulus	11	1147	0.73	0.00028	EP300,ATM,PIEZO1,TERT,ATR,VCP,PTEN,FANCG,BRCA2,BRCA1,TRPM1
GO Process	GO:0033044	Regulation of chromosome organization	7	359	2023-04-01	0.00028	NBN,TINF2,ATM,MRE11A,ATR,ATRX,BRCA1
GO Process	GO:0050896	Response to stimulus	28	8046	0.29	0.00028	PHOX2B,HERC2,EP300,NBN,ATM,MITF,PIEZO1,TERT,FANCI,TUBB3,MRE11A,ATR,VCP,PARK2,PTEN,ATRX,AR,FANCG,BRCA2,PDX1,FANCA,PRF1,PAX6,GDNF,BRCA1,TRPM1,WWOX,RECQL4
GO Process	GO:0051052	Regulation of dna metabolic process	7	360	2023-04-01	0.00028	NBN,TINF2,ATM,MRE11A,ATR,ATRX,BRCA1
GO Process	GO:0007283	Spermatogenesis	8	525	0.93	0.00030	HERC2,OCA2,ASPM,ATRX,AR,FANCG,BRCA2,LARP7
GO Process	GO:0051129	Negative regulation of cellular component organization	9	713	0.85	0.00030	EP300,NBN,TINF2,ATM,PARK2,PTEN,ATRX,AR,BRCA1
GO Process	GO:2001234	Negative regulation of apoptotic signaling pathway	6	232	1.16	0.00030	TERT,PARK2,AR,PDX1,GDNF,BRCA1
GO Process	GO:0036297	Interstrand cross-link repair	4	56	2023-06-01	0.00032	FANCI,ATR,FANCG,FANCA
GO Process	GO:0051253	Negative regulation of rna metabolic process	12	1422	0.67	0.00032	EP300,MITF,TERT,PURA,PARK2,ATRX,AR,PDX1,PAX6,GDNF,BRCA1,WWOX
GO Process	GO:0050680	Negative regulation of epithelial cell proliferation	5	131	1.33	0.00033	TINF2,PTEN,AR,BRCA2,PAX6
GO Process	GO:0043388	Positive regulation of dna binding	4	59	1.58	0.00038	EP300,PARK2,PDX1,PAX6
GO Process	GO:2001251	Negative regulation of chromosome organization	5	137	1.31	0.00041	NBN,TINF2,ATM,ATRX,BRCA1
GO Process	GO:0045787	Positive regulation of cell cycle	7	388	1.0	0.00042	PHOX2B,EP300,ATM,TERT,ATRX,BRCA2,BRCA1
GO Process	GO:0007399	Nervous system development	15	2371	0.55	0.00043	PHOX2B,EP300,ATM,TERT,TUBB3,PURA,PARK2,ASPM,PTEN,ATRX,BRCA2,PDX1,PAX6,GDNF,TRPM1
GO Process	GO:0051130	Positive regulation of cellular component organization	11	1209	0.71	0.00043	EP300,NBN,ATM,PIEZO1,MRE11A,ATR,VCP,PARK2,ATRX,AR,BRCA1
GO Process	GO:0007417	Central nervous system development	10	988	0.75	0.00050	PHOX2B,ATM,PARK2,ASPM,PTEN,ATRX,BRCA2,PDX1,PAX6,GDNF
GO Process	GO:0009966	Regulation of signal transduction	17	3107	0.49	0.00051	EP300,NBN,ATM,TERT,MRE11A,ATR,VCP,PARK2,ASPM,PTEN,AR,PDX1,BRPF1,FANCA,GDNF,BRCA1,WWOX
GO Process	GO:0007569	Cell aging	4	66	1.53	0.00055	ATM,TERT,ATR,BRCA2
GO Process	GO:1903322	Positive regulation of protein modification by small protein conjugation or removal	5	147	1.28	0.00055	FANCI,VCP,PARK2,PTEN,BRCA1
GO Process	GO:0140013	Meiotic nuclear division	5	152	1.26	0.00063	ATM,MRE11A,ASPM,BRCA2,FANCA
GO Process	GO:0007093	Mitotic cell cycle checkpoint	5	156	1.25	0.00070	EP300,NBN,ATM,MRE11A,BRCA1
GO Process	GO:0007568	Aging	6	274	2023-09-01	0.00070	ATM,TERT,ATR,PTEN,BRCA2,PDX1
GO Process	GO:0008630	Intrinsic apoptotic signaling pathway in response to dna damage	4	71	2023-05-01	0.00070	EP300,ATM,BRCA2,BRCA1
GO Process	GO:0010468	Regulation of gene expression	21	4813	0.39	0.00070	PHOX2B,EP300,ATM,MITF,TERT,MRE11A,PURA,PARK2,PTEN,ATRX,AR,BRCA2,PDX1,BRPF1,FANCA,ELP4,PAX6,GDNF,BRCA1,LARP7,WWOX
GO Process	GO:0042981	Regulation of apoptotic process	12	1550	0.64	0.00070	ATM,MITF,TERT,MRE11A,VCP,PARK2,PTEN,AR,PDX1,GDNF,BRCA1,WWOX
GO Process	GO:0048513	Animal organ development	17	3197	0.47	0.00072	PHOX2B,EP300,ATM,MITF,TUBB3,ASPM,PTEN,ATRX,AR,FANCG,BRCA2,PDX1,FANCA,PAX6,GDNF,TRPM1,WWOX
GO Process	GO:0007095	Mitotic g2 dna damage checkpoint	3	21	2023-09-01	0.00076	NBN,ATM,MRE11A
GO Process	GO:0009314	Response to radiation	7	431	0.96	0.00076	EP300,ATM,ATR,FANCG,BRCA2,BRCA1,TRPM1
GO Process	GO:0016579	Protein deubiquitination	6	281	2023-08-01	0.00077	EP300,VCP,PARK2,PTEN,AR,BRCA1
GO Process	GO:1903047	Mitotic cell cycle process	8	616	0.86	0.00080	EP300,NBN,ATM,MRE11A,VCP,BRCA2,PAX6,BRCA1
GO Process	GO:0019438	Aromatic compound biosynthetic process	10	1070	0.72	0.00091	MITF,TERT,MRE11A,OCA2,VCP,PTEN,AR,PDX1,ELP4,PAX6
GO Process	GO:0022616	DNA strand elongation	3	23	1.86	0.00093	NBN,TERT,MRE11A
GO Process	GO:0090068	Positive regulation of cell cycle process	6	294	2023-06-01	0.00096	PHOX2B,EP300,ATM,TERT,ATRX,BRCA1
GO Process	GO:0065007	Biological regulation	33	12171	0.18	0.0010	PHOX2B,HERC2,EP300,NBN,TINF2,ATM,MITF,PIEZO1,TERT,FANCI,TUBB3,MRE11A,PURA,ATR,VCP,PARK2,ASPM,PTEN,ATRX,AR,BRCA2,PDX1,BRPF1,FANCA,ELP4,PRF1,PAX6,GDNF,BRCA1,LARP7,TRPM1,WWOX,RECQL4
GO Process	GO:0051099	Positive regulation of binding	5	175	2023-02-01	0.0011	EP300,TERT,PARK2,PDX1,PAX6
GO Process	GO:0035264	Multicellular organism growth	4	86	1.41	0.0013	EP300,ATM,ATRX,AR
GO Process	GO:0042592	Homeostatic process	12	1676	0.6	0.0013	NBN,TINF2,ATM,TERT,MRE11A,ATR,PARK2,BRCA2,PDX1,PAX6,TRPM1,RECQL4
GO Process	GO:0071214	Cellular response to abiotic stimulus	6	313	2023-03-01	0.0013	EP300,ATM,PIEZO1,ATR,PTEN,TRPM1
GO Process	GO:0097694	Establishment of rna localization to telomere	2	2	2.75	0.0013	ATM,ATR
GO Process	GO:0097695	Establishment of protein-containing complex localization to telomere	2	2	2.75	0.0013	ATM,ATR
GO Process	GO:1904884	Positive regulation of telomerase catalytic core complex assembly	2	2	2.75	0.0013	ATM,ATR
GO Process	GO:0000122	Negative regulation of transcription by rna polymerase ii	9	895	0.75	0.0014	EP300,MITF,PURA,PARK2,ATRX,AR,PDX1,PAX6,WWOX
GO Process	GO:0043066	Negative regulation of apoptotic process	9	893	0.75	0.0014	MITF,TERT,MRE11A,PARK2,PTEN,AR,PDX1,GDNF,BRCA1
GO Process	GO:0048285	Organelle fission	6	318	2023-02-01	0.0014	ATM,MRE11A,PARK2,ASPM,BRCA2,FANCA
GO Process	GO:0000226	Microtubule cytoskeleton organization	7	492	0.9	0.0015	TUBB3,VCP,ASPM,ATRX,BRCA2,PAX6,BRCA1
GO Process	GO:0008585	Female gonad development	4	91	1.39	0.0015	ATM,FANCG,BRCA2,FANCA
GO Process	GO:0032268	Regulation of cellular protein metabolic process	15	2693	0.49	0.0016	EP300,NBN,TINF2,ATM,FANCI,MRE11A,PURA,VCP,PARK2,PTEN,ATRX,AR,ELP4,PAX6,BRCA1
GO Process	GO:0010389	Regulation of g2/m transition of mitotic cell cycle	5	198	1.15	0.0018	PHOX2B,NBN,ATM,MRE11A,BRCA1
GO Process	GO:0016233	Telomere capping	3	32	1.72	0.0020	NBN,TINF2,MRE11A
GO Process	GO:0022412	Cellular process involved in reproduction in multicellular organism	6	345	0.99	0.0020	ATM,OCA2,ASPM,FANCG,BRCA2,FANCA
GO Process	GO:0031297	Replication fork processing	3	32	1.72	0.0020	MRE11A,ATRX,BRCA2
GO Process	GO:0050794	Regulation of cellular process	31	10932	0.2	0.0021	PHOX2B,EP300,NBN,TINF2,ATM,MITF,PIEZO1,TERT,FANCI,TUBB3,MRE11A,PURA,ATR,VCP,PARK2,ASPM,PTEN,ATRX,AR,BRCA2,PDX1,BRPF1,FANCA,ELP4,PRF1,PAX6,GDNF,BRCA1,LARP7,TRPM1,WWOX
GO Process	GO:0007017	Microtubule-based process	8	727	0.79	0.0022	TUBB3,PURA,VCP,ASPM,ATRX,BRCA2,PAX6,BRCA1
GO Process	GO:0044773	Mitotic dna damage checkpoint	4	101	1.35	0.0022	EP300,NBN,ATM,MRE11A
GO Process	GO:1901362	Organic cyclic compound biosynthetic process	10	1211	0.66	0.0022	MITF,TERT,MRE11A,OCA2,VCP,PTEN,AR,PDX1,ELP4,PAX6
GO Process	GO:2000026	Regulation of multicellular organismal development	13	2096	0.54	0.0022	PHOX2B,EP300,MITF,TERT,PARK2,ASPM,PTEN,AR,BRCA2,FANCA,PAX6,GDNF,BRCA1
GO Process	GO:0080135	Regulation of cellular response to stress	8	739	0.78	0.0024	EP300,ATM,TERT,ATR,PARK2,PTEN,PDX1,BRCA1
GO Process	GO:0033365	Protein localization to organelle	8	743	0.78	0.0025	TINF2,ATM,TERT,ATR,PARK2,ATRX,BRCA2,PAX6
GO Process	GO:2001237	Negative regulation of extrinsic apoptotic signaling pathway	4	106	1.32	0.0025	TERT,AR,GDNF,BRCA1
GO Process	GO:0009786	Regulation of asymmetric cell division	2	4	2.45	0.0027	ASPM,PAX6
GO Process	GO:0010647	Positive regulation of cell communication	12	1823	0.57	0.0027	EP300,ATM,TERT,ATR,VCP,PARK2,ASPM,PTEN,AR,PDX1,GDNF,WWOX
GO Process	GO:0031860	Telomeric 3 overhang formation	2	4	2.45	0.0027	NBN,MRE11A
GO Process	GO:0006275	Regulation of dna replication	4	111	2023-03-01	0.0028	NBN,ATR,ATRX,BRCA2
GO Process	GO:0023056	Positive regulation of signaling	12	1831	0.56	0.0028	EP300,ATM,TERT,ATR,VCP,PARK2,ASPM,PTEN,AR,PDX1,GDNF,WWOX
GO Process	GO:0034654	Nucleobase-containing compound biosynthetic process	9	995	0.7	0.0028	MITF,TERT,MRE11A,VCP,PTEN,AR,PDX1,ELP4,PAX6
GO Process	GO:0045597	Positive regulation of cell differentiation	9	993	0.7	0.0028	PHOX2B,EP300,TERT,PARK2,ASPM,PTEN,AR,PAX6,GDNF
GO Process	GO:0071156	Regulation of cell cycle arrest	4	110	1.31	0.0028	PHOX2B,EP300,ATM,BRCA1
GO Process	GO:0009790	Embryo development	9	1002	0.7	0.0029	EP300,NBN,ATM,AR,BRCA2,PDX1,PAX6,GDNF,BRCA1
GO Process	GO:0032205	Negative regulation of telomere maintenance	3	38	1.64	0.0029	NBN,TINF2,ATM
GO Process	GO:0009968	Negative regulation of signal transduction	10	1271	0.64	0.0030	ATM,TERT,VCP,PARK2,PTEN,AR,PDX1,GDNF,BRCA1,WWOX
GO Process	GO:0000904	Cell morphogenesis involved in differentiation	7	566	0.84	0.0031	PHOX2B,EP300,TUBB3,PTEN,AR,PAX6,GDNF
GO Process	GO:0045892	Negative regulation of transcription, dna-templated	10	1273	0.64	0.0031	EP300,MITF,PURA,PARK2,ATRX,AR,PDX1,PAX6,BRCA1,WWOX
GO Process	GO:0097659	Nucleic acid-templated transcription	7	568	0.84	0.0032	MITF,TERT,PTEN,AR,PDX1,ELP4,PAX6
GO Process	GO:0060322	Head development	8	788	0.75	0.0034	PHOX2B,EP300,ATM,ASPM,PTEN,ATRX,BRCA2,PAX6
GO Process	GO:0010639	Negative regulation of organelle organization	6	395	0.93	0.0037	NBN,TINF2,ATM,PARK2,ATRX,BRCA1
GO Process	GO:2000648	Positive regulation of stem cell proliferation	3	43	1.59	0.0039	TERT,ASPM,PAX6
GO Process	GO:0034613	Cellular protein localization	11	1610	0.58	0.0040	HERC2,TINF2,ATM,TERT,PURA,ATR,VCP,PARK2,ATRX,BRCA2,PAX6
GO Process	GO:0031398	Positive regulation of protein ubiquitination	4	126	1.25	0.0042	FANCI,PARK2,PTEN,BRCA1
GO Process	GO:0070842	Aggresome assembly	2	6	2.27	0.0044	VCP,PARK2
GO Process	GO:0007140	Male meiotic nuclear division	3	46	1.56	0.0046	ATM,BRCA2,FANCA
GO Process	GO:0007281	Germ cell development	5	256	2023-04-01	0.0048	ATM,OCA2,ASPM,FANCG,BRCA2
GO Process	GO:0009987	Cellular process	35	15024	0.11	0.0049	PHOX2B,HERC2,EP300,NBN,TINF2,ATM,MITF,PIEZO1,TERT,FANCI,TUBB3,MRE11A,PURA,ATR,OCA2,VCP,PARK2,ASPM,PTEN,ATRX,AR,FANCG,BRCA2,PDX1,BRPF1,FANCA,ELP4,PRF1,PAX6,GDNF,BRCA1,LARP7,TRPM1,WWOX,RECQL4
GO Process	GO:0008584	Male gonad development	4	133	1.23	0.0051	ASPM,ATRX,AR,FANCA
GO Process	GO:2001239	Regulation of extrinsic apoptotic signaling pathway in absence of ligand	3	48	1.54	0.0051	TERT,GDNF,WWOX
GO Process	GO:0010638	Positive regulation of organelle organization	7	633	0.79	0.0057	NBN,ATM,MRE11A,ATR,PARK2,ATRX,BRCA1
GO Process	GO:0051094	Positive regulation of developmental process	10	1389	0.6	0.0057	PHOX2B,EP300,TERT,PARK2,ASPM,PTEN,AR,PAX6,GDNF,BRCA1
GO Process	GO:0072332	Intrinsic apoptotic signaling pathway by p53 class mediator	3	51	1.52	0.0059	EP300,BRCA2,WWOX
GO Process	GO:0090329	Regulation of dna-dependent dna replication	3	51	1.52	0.0059	NBN,ATRX,BRCA2
GO Process	GO:0010629	Negative regulation of gene expression	12	2014	0.52	0.0060	EP300,ATM,MITF,TERT,PURA,PARK2,ATRX,AR,PDX1,PAX6,BRCA1,WWOX
GO Process	GO:0043009	Chordate embryonic development	7	640	0.79	0.0060	EP300,NBN,ATM,AR,BRCA2,PAX6,BRCA1
GO Process	GO:0022607	Cellular component assembly	13	2359	0.49	0.0061	EP300,NBN,TINF2,MITF,TERT,VCP,PARK2,ASPM,PTEN,ATRX,FANCA,PRF1,TRPM1
GO Process	GO:0010212	Response to ionizing radiation	4	145	1.19	0.0066	ATM,ATR,BRCA2,BRCA1
GO Process	GO:0085020	Protein k6-linked ubiquitination	2	8	2.15	0.0066	PARK2,BRCA1
GO Process	GO:1904354	Negative regulation of telomere capping	2	8	2.15	0.0066	NBN,ATM
GO Process	GO:0032210	Regulation of telomere maintenance via telomerase	3	55	1.48	0.0070	TINF2,ATM,ATR
GO Process	GO:0051128	Regulation of cellular component organization	13	2402	0.48	0.0072	EP300,NBN,TINF2,ATM,PIEZO1,MRE11A,ATR,VCP,PARK2,PTEN,ATRX,AR,BRCA1
GO Process	GO:0050768	Negative regulation of neurogenesis	5	287	0.99	0.0074	PHOX2B,TERT,ASPM,PTEN,PAX6
GO Process	GO:0010332	Response to gamma radiation	3	58	1.46	0.0081	ATM,ATR,BRCA2
GO Process	GO:0006915	Apoptotic process	8	918	0.69	0.0083	EP300,NBN,ATM,PTEN,BRCA2,PRF1,BRCA1,WWOX
GO Process	GO:0008284	Positive regulation of cell population proliferation	8	919	0.69	0.0083	TERT,PURA,ASPM,PTEN,AR,PDX1,PAX6,GDNF
GO Process	GO:0051240	Positive regulation of multicellular organismal process	11	1770	0.54	0.0083	PHOX2B,EP300,TERT,MRE11A,PARK2,ASPM,PTEN,AR,PAX6,GDNF,BRCA1
GO Process	GO:2000045	Regulation of g1/s transition of mitotic cell cycle	4	156	1.16	0.0083	EP300,ATM,TERT,PTEN
GO Process	GO:0050769	Positive regulation of neurogenesis	6	479	0.85	0.0088	PHOX2B,EP300,PARK2,ASPM,PTEN,PAX6
GO Process	GO:0065009	Regulation of molecular function	19	4913	0.33	0.0097	PHOX2B,HERC2,EP300,NBN,MITF,TERT,MRE11A,PURA,VCP,PARK2,PTEN,AR,PDX1,FANCA,ELP4,PAX6,GDNF,BRCA1,WWOX
GO Process	GO:1902531	Regulation of intracellular signal transduction	11	1807	0.53	0.0097	EP300,NBN,ATM,MRE11A,ATR,PARK2,PTEN,AR,PDX1,BRPF1,BRCA1
GO Process	GO:0008104	Protein localization	12	2139	0.5	0.0098	HERC2,TINF2,ATM,TERT,PURA,ATR,VCP,PARK2,ATRX,BRCA2,PDX1,PAX6
GO Process	GO:0008283	Cell population proliferation	6	493	0.83	0.0102	NBN,MRE11A,PURA,OCA2,ASPM,BRCA2
GO Process	GO:0009653	Anatomical structure morphogenesis	12	2165	0.49	0.0108	PHOX2B,EP300,ATM,TUBB3,PTEN,ATRX,AR,PDX1,PAX6,GDNF,TRPM1,WWOX
GO Process	GO:0071478	Cellular response to radiation	4	170	2023-12-01	0.0111	EP300,ATM,ATR,TRPM1
GO Process	GO:0009887	Animal organ morphogenesis	8	967	0.67	0.0112	EP300,PTEN,AR,PDX1,PAX6,GDNF,TRPM1,WWOX
GO Process	GO:0043412	Macromolecule modification	15	3277	0.41	0.0112	HERC2,EP300,ATM,ATR,VCP,PARK2,PTEN,ATRX,AR,BRCA2,BRPF1,ELP4,GDNF,BRCA1,LARP7
GO Process	GO:0044093	Positive regulation of molecular function	11	1842	0.52	0.0112	EP300,NBN,TERT,MRE11A,VCP,PARK2,PTEN,AR,PDX1,PAX6,GDNF
GO Process	GO:0044087	Regulation of cellular component biogenesis	8	971	0.66	0.0115	EP300,ATM,PIEZO1,ATR,VCP,PARK2,PTEN,BRCA1
GO Process	GO:0070192	Chromosome organization involved in meiotic cell cycle	3	68	1.39	0.0117	ATM,MRE11A,ATRX
GO Process	GO:0031401	Positive regulation of protein modification process	9	1252	0.6	0.0118	NBN,ATM,FANCI,MRE11A,VCP,PARK2,PTEN,AR,BRCA1
GO Process	GO:0048484	Enteric nervous system development	2	12	1.97	0.0118	PHOX2B,GDNF
GO Process	GO:0060736	Prostate gland growth	2	12	1.97	0.0118	PTEN,AR
GO Process	GO:0072425	Signal transduction involved in g2 dna damage checkpoint	2	12	1.97	0.0118	ATM,BRCA1
GO Process	GO:0072520	Seminiferous tubule development	2	12	1.97	0.0118	ATRX,AR
GO Process	GO:0048699	Generation of neurons	10	1551	0.56	0.0120	PHOX2B,EP300,TERT,TUBB3,PARK2,ASPM,PTEN,PAX6,GDNF,TRPM1
GO Process	GO:0045595	Regulation of cell differentiation	11	1874	0.52	0.0123	PHOX2B,EP300,MITF,TERT,PARK2,ASPM,PTEN,AR,FANCA,PAX6,GDNF
GO Process	GO:0007420	Brain development	7	745	0.72	0.0129	PHOX2B,ATM,ASPM,PTEN,ATRX,BRCA2,PAX6
GO Process	GO:0000212	Meiotic spindle organization	2	13	1.93	0.0132	ASPM,ATRX
GO Process	GO:0010035	Response to inorganic substance	6	538	0.79	0.0147	TERT,VCP,PARK2,PTEN,ATRX,PDX1
GO Process	GO:0048584	Positive regulation of response to stimulus	12	2257	0.47	0.0147	EP300,ATM,TERT,ATR,VCP,PARK2,ASPM,PTEN,AR,PDX1,BRCA1,WWOX
GO Process	GO:0072422	Signal transduction involved in dna damage checkpoint	3	75	1.35	0.0147	EP300,ATM,BRCA1
GO Process	GO:0033143	Regulation of intracellular steroid hormone receptor signaling pathway	3	76	1.34	0.0151	EP300,AR,BRCA1
GO Process	GO:0033043	Regulation of organelle organization	9	1306	0.59	0.0153	EP300,NBN,TINF2,ATM,MRE11A,ATR,PARK2,ATRX,BRCA1
GO Process	GO:0051179	Localization	20	5591	0.3	0.0153	PHOX2B,HERC2,TINF2,ATM,PIEZO1,TERT,PURA,ATR,OCA2,VCP,PARK2,ASPM,PTEN,ATRX,BRCA2,PDX1,PRF1,PAX6,GDNF,TRPM1
GO Process	GO:0006268	DNA unwinding involved in DNA replication	2	15	1.87	0.0163	PURA,RECQL4
GO Process	GO:0006978	DNA damage response, signal transduction by p53 class mediator resulting in transcription of p21 class mediator	2	15	1.87	0.0163	BRCA2,BRCA1
GO Process	GO:0042325	Regulation of phosphorylation	10	1626	0.54	0.0164	EP300,NBN,ATM,MRE11A,VCP,PARK2,PTEN,AR,ELP4,PAX6
GO Process	GO:1900034	Regulation of cellular response to heat	3	79	1.33	0.0164	EP300,ATM,ATR
GO Process	GO:0043517	Positive regulation of dna damage response, signal transduction by p53 class mediator	2	16	1.84	0.0180	ATM,ATR
GO Process	GO:0006351	Transcription, dna-templated	6	567	0.77	0.0184	MITF,PTEN,AR,PDX1,ELP4,PAX6
GO Process	GO:0009967	Positive regulation of signal transduction	10	1654	0.53	0.0184	EP300,ATM,TERT,ATR,VCP,PARK2,ASPM,PTEN,AR,WWOX
GO Process	GO:0048477	Oogenesis	3	83	1.31	0.0184	ATM,ASPM,BRCA2
GO Process	GO:0071158	Positive regulation of cell cycle arrest	3	84	2023-03-01	0.0189	EP300,ATM,BRCA1
GO Process	GO:0030111	Regulation of wnt signaling pathway	5	370	0.88	0.0191	TERT,VCP,PARK2,ASPM,WWOX
GO Process	GO:0051580	Regulation of neurotransmitter uptake	2	17	1.82	0.0196	PARK2,GDNF
GO Process	GO:0061548	Ganglion development	2	17	1.82	0.0196	PHOX2B,TUBB3
GO Process	GO:0032092	Positive regulation of protein binding	3	86	1.29	0.0199	EP300,TERT,PARK2
GO Process	GO:0043523	Regulation of neuron apoptotic process	4	212	2023-02-01	0.0214	ATM,TERT,PARK2,GDNF
GO Process	GO:0050767	Regulation of neurogenesis	7	828	0.67	0.0217	PHOX2B,EP300,TERT,PARK2,ASPM,PTEN,PAX6
GO Process	GO:0007409	Axonogenesis	5	384	0.86	0.0220	PHOX2B,TUBB3,PTEN,PAX6,GDNF
GO Process	GO:0035556	Intracellular signal transduction	10	1712	0.51	0.0232	EP300,NBN,ATM,PTEN,ATRX,BRCA2,PDX1,GDNF,BRCA1,WWOX
GO Process	GO:0001832	Blastocyst growth	2	19	1.77	0.0233	NBN,BRCA2
GO Process	GO:0003309	Type b pancreatic cell differentiation	2	19	1.77	0.0233	PDX1,PAX6
GO Process	GO:0046649	Lymphocyte activation	5	390	0.86	0.0233	EP300,NBN,ATM,PURA,PRF1
GO Process	GO:0048486	Parasympathetic nervous system development	2	19	1.77	0.0233	PHOX2B,GDNF
GO Process	GO:0045665	Negative regulation of neuron differentiation	4	222	1.0	0.0246	PHOX2B,ASPM,PTEN,PAX6
GO Process	GO:0035295	Tube development	7	851	0.66	0.0249	EP300,PTEN,ATRX,AR,PDX1,PAX6,GDNF
GO Process	GO:1902236	Negative regulation of endoplasmic reticulum stress-induced intrinsic apoptotic signaling pathway	2	20	1.75	0.0252	PARK2,PDX1
GO Process	GO:0006366	Transcription by rna polymerase ii	5	406	0.84	0.0274	PTEN,AR,PDX1,ELP4,PAX6
GO Process	GO:0030318	Melanocyte differentiation	2	21	1.73	0.0274	MITF,OCA2
GO Process	GO:0048485	Sympathetic nervous system development	2	21	1.73	0.0274	PHOX2B,GDNF
GO Process	GO:0080134	Regulation of response to stress	9	1437	0.54	0.0274	EP300,ATM,TERT,ATR,PARK2,PTEN,PDX1,FANCA,BRCA1
GO Process	GO:0009888	Tissue development	10	1760	0.5	0.0278	PHOX2B,EP300,ATM,TUBB3,PTEN,ATRX,AR,PDX1,PAX6,GDNF
GO Process	GO:0048732	Gland development	5	410	0.83	0.0282	ATM,PTEN,AR,PDX1,PAX6
GO Process	GO:0051239	Regulation of multicellular organismal process	14	3227	0.38	0.0283	PHOX2B,EP300,MITF,TERT,MRE11A,PARK2,ASPM,PTEN,AR,BRCA2,FANCA,PAX6,GDNF,BRCA1
GO Process	GO:0007004	Telomere maintenance via telomerase	2	22	1.71	0.0293	TERT,MRE11A
GO Process	GO:0071897	DNA biosynthetic process	3	101	1.22	0.0293	TERT,MRE11A,VCP
GO Process	GO:0002052	Positive regulation of neuroblast proliferation	2	23	1.69	0.0314	ASPM,PAX6
GO Process	GO:0006359	Regulation of transcription by rna polymerase iii	2	23	1.69	0.0314	AR,BRCA1
GO Process	GO:0016573	Histone acetylation	3	105	2023-02-01	0.0323	EP300,BRCA2,BRPF1
GO Process	GO:2001022	Positive regulation of response to dna damage stimulus	3	106	2023-02-01	0.0330	ATM,ATR,BRCA1
GO Process	GO:0051570	Regulation of histone h3-k9 methylation	2	24	1.67	0.0336	ATRX,BRCA1
GO Process	GO:2000134	Negative regulation of g1/s transition of mitotic cell cycle	3	107	2023-02-01	0.0337	EP300,ATM,PTEN
GO Process	GO:0031334	Positive regulation of protein-containing complex assembly	4	249	0.95	0.0351	ATM,PIEZO1,ATR,VCP
GO Process	GO:0050905	Neuromuscular process	3	109	1.19	0.0352	NBN,PARK2,PTEN
GO Process	GO:0070887	Cellular response to chemical stimulus	13	2919	0.4	0.0356	PHOX2B,EP300,ATM,TERT,VCP,PARK2,PTEN,ATRX,AR,PAX6,GDNF,BRCA1,WWOX
GO Process	GO:0045664	Regulation of neuron differentiation	6	665	0.7	0.0365	PHOX2B,EP300,PARK2,ASPM,PTEN,PAX6
GO Process	GO:0051341	Regulation of oxidoreductase activity	3	111	1.18	0.0365	TERT,PARK2,GDNF
GO Process	GO:0007127	Meiosis i	3	112	1.18	0.0373	ATM,MRE11A,BRCA2
GO Process	GO:0090344	Negative regulation of cell aging	2	26	1.63	0.0377	TERT,PTEN
GO Process	GO:0071482	Cellular response to light stimulus	3	113	1.17	0.0378	EP300,ATR,TRPM1
GO Process	GO:2000060	Positive regulation of ubiquitin-dependent protein catabolic process	3	115	1.16	0.0391	VCP,PARK2,PTEN
GO Process	GO:0043254	Regulation of protein-containing complex assembly	5	451	0.79	0.0393	EP300,ATM,PIEZO1,ATR,VCP
GO Process	GO:2000679	Positive regulation of transcription regulatory region dna binding	2	27	1.62	0.0393	EP300,PAX6
GO Process	GO:0051641	Cellular localization	13	2967	0.39	0.0396	HERC2,TINF2,ATM,TERT,PURA,ATR,VCP,PARK2,ASPM,ATRX,BRCA2,PAX6,TRPM1
GO Process	GO:0043933	Protein-containing complex subunit organization	9	1539	0.51	0.0400	EP300,MITF,TERT,VCP,PARK2,ATRX,FANCA,PRF1,TRPM1
GO Process	GO:0031954	Positive regulation of protein autophosphorylation	2	28	2023-06-01	0.0416	NBN,MRE11A
GO Process	GO:0001964	Startle response	2	29	1.59	0.0442	PARK2,PTEN
GO Process	GO:1904837	beta-catenin-TCF complex assembly	2	29	1.59	0.0442	EP300,TERT
GO Process	GO:0001764	Neuron migration	3	123	1.13	0.0461	PHOX2B,ASPM,PAX6
GO Process	GO:0033048	Negative regulation of mitotic sister chromatid segregation	2	30	1.57	0.0468	ATM,ATRX
GO Process	GO:0042771	Intrinsic apoptotic signaling pathway in response to dna damage by p53 class mediator	2	30	1.57	0.0468	EP300,BRCA2
GO Process	GO:0016070	RNA metabolic process	9	1584	0.5	0.0479	ATM,MITF,TERT,PTEN,AR,PDX1,ELP4,PAX6,LARP7
GO Process	GO:0010165	Response to x-ray	2	31	1.56	0.0491	ATM,BRCA2
GO Process	GO:0032770	Positive regulation of monooxygenase activity	2	31	1.56	0.0491	TERT,GDNF
GO Process	GO:0051093	Negative regulation of developmental process	7	983	0.6	0.0491	PHOX2B,TERT,PARK2,ASPM,PTEN,BRCA2,PAX6
GO Process	GO:0071480	Cellular response to gamma radiation	2	31	1.56	0.0491	ATM,ATR
GO Molecular Function
GO Function	GO:0003677	DNA binding	21	2470	0.68	1.78e-07	PHOX2B,EP300,NBN,TINF2,ATM,MITF,TERT,FANCI,MRE11A,PURA,ATR,PARK2,ATRX,AR,FANCG,BRCA2,PDX1,BRPF1,PAX6,BRCA1,RECQL4
GO Function	GO:0003676	Nucleic acid binding	23	3947	0.51	1.10e-05	PHOX2B,EP300,NBN,TINF2,ATM,MITF,TERT,FANCI,MRE11A,PURA,ATR,VCP,PARK2,ATRX,AR,FANCG,BRCA2,PDX1,BRPF1,PAX6,BRCA1,LARP7,RECQL4
GO Function	GO:0003684	Damaged dna binding	5	64	1.64	0.00015	EP300,NBN,FANCG,BRCA1,RECQL4
GO Function	GO:1901363	Heterocyclic compound binding	24	5831	0.36	0.0021	PHOX2B,EP300,NBN,TINF2,ATM,MITF,TERT,FANCI,TUBB3,MRE11A,PURA,ATR,VCP,PARK2,ATRX,AR,FANCG,BRCA2,PDX1,BRPF1,PAX6,BRCA1,LARP7,RECQL4
GO Function	GO:0097159	Organic cyclic compound binding	24	5916	0.36	0.0022	PHOX2B,EP300,NBN,TINF2,ATM,MITF,TERT,FANCI,TUBB3,MRE11A,PURA,ATR,VCP,PARK2,ATRX,AR,FANCG,BRCA2,PDX1,BRPF1,PAX6,BRCA1,LARP7,RECQL4
GO Function	GO:1990381	Ubiquitin-specific protease binding	3	21	2023-09-01	0.0056	VCP,PARK2,PTEN
GO Function	GO:0043565	Sequence-specific dna binding	11	1331	0.66	0.0062	PHOX2B,EP300,TINF2,MITF,TERT,PURA,PARK2,AR,PDX1,PAX6,BRCA1
GO Function	GO:0008134	Transcription factor binding	8	672	0.82	0.0084	EP300,NBN,TERT,PURA,AR,PDX1,PAX6,BRCA1
GO Function	GO:0003690	Double-stranded dna binding	10	1156	0.68	0.0090	PHOX2B,EP300,MITF,MRE11A,PURA,PARK2,AR,PDX1,PAX6,BRCA1
GO Function	GO:0042162	Telomeric dna binding	3	36	1.67	0.0148	TINF2,TERT,PURA
GO Function	GO:0000976	Transcription regulatory region sequence-specific dna binding	9	1028	0.69	0.0187	PHOX2B,EP300,MITF,PURA,PARK2,AR,PDX1,PAX6,BRCA1
GO Function	GO:0002020	Protease binding	4	138	1.21	0.0268	VCP,PARK2,PTEN,BRCA2
GO Function	GO:0031625	Ubiquitin protein ligase binding	5	296	0.98	0.0397	HERC2,VCP,PARK2,PAX6,BRCA1
GO Cellular Component
GO Component	GO:0005654	Nucleoplasm	26	3973	0.56	1.79e-08	PHOX2B,HERC2,EP300,NBN,TINF2,ATM,MITF,TERT,FANCI,MRE11A,ATR,VCP,PARK2,PTEN,ATRX,AR,FANCG,BRCA2,PDX1,BRPF1,FANCA,ELP4,PAX6,BRCA1,LARP7,WWOX
GO Component	GO:0031981	Nuclear lumen	27	4733	0.5	5.75e-08	PHOX2B,HERC2,EP300,NBN,TINF2,ATM,MITF,TERT,FANCI,MRE11A,PURA,ATR,VCP,PARK2,PTEN,ATRX,AR,FANCG,BRCA2,PDX1,BRPF1,FANCA,ELP4,PAX6,BRCA1,LARP7,WWOX
GO Component	GO:0000781	Chromosome, telomeric region	8	134	1.52	5.77e-08	NBN,TINF2,TERT,MRE11A,PURA,ATRX,BRCA2,RECQL4
GO Component	GO:0005694	Chromosome	18	1712	0.77	5.77e-08	PHOX2B,EP300,NBN,TINF2,MITF,TERT,MRE11A,PURA,ATR,VCP,ATRX,AR,BRCA2,PDX1,BRPF1,PAX6,BRCA1,RECQL4
GO Component	GO:0000784	Nuclear chromosome, telomeric region	7	102	1.58	2.72e-07	NBN,TINF2,TERT,MRE11A,PURA,ATRX,BRCA2
GO Component	GO:0070013	Intracellular organelle lumen	28	5857	0.43	3.93e-07	PHOX2B,HERC2,EP300,NBN,TINF2,ATM,MITF,TERT,FANCI,MRE11A,PURA,ATR,VCP,PARK2,PTEN,ATRX,AR,FANCG,BRCA2,PDX1,BRPF1,FANCA,ELP4,PRF1,PAX6,BRCA1,LARP7,WWOX
GO Component	GO:0005634	Nucleus	30	7390	0.36	1.35e-06	PHOX2B,HERC2,EP300,NBN,TINF2,ATM,MITF,TERT,FANCI,TUBB3,MRE11A,PURA,ATR,VCP,PARK2,ASPM,PTEN,ATRX,AR,FANCG,BRCA2,PDX1,BRPF1,FANCA,ELP4,PAX6,BRCA1,LARP7,WWOX,RECQL4
GO Component	GO:0043231	Intracellular membrane-bounded organelle	34	10761	0.25	4.21e-06	PHOX2B,HERC2,EP300,NBN,TINF2,ATM,MITF,PIEZO1,TERT,FANCI,TUBB3,MRE11A,PURA,ATR,OCA2,VCP,PARK2,ASPM,PTEN,ATRX,AR,FANCG,BRCA2,PDX1,BRPF1,FANCA,ELP4,PRF1,PAX6,GDNF,BRCA1,LARP7,WWOX,RECQL4
GO Component	GO:0016605	PML body	6	101	1.52	5.06e-06	NBN,TERT,MRE11A,ATR,PTEN,ATRX
GO Component	GO:0016604	Nuclear body	11	789	0.89	1.18e-05	NBN,TINF2,TERT,MRE11A,ATR,PARK2,PTEN,ATRX,AR,PDX1,BRCA1
GO Component	GO:0000228	Nuclear chromosome	13	1256	0.76	1.55e-05	PHOX2B,NBN,TINF2,MITF,TERT,MRE11A,PURA,ATRX,AR,BRCA2,PDX1,PAX6,BRCA1
GO Component	GO:0043232	Intracellular non-membrane-bounded organelle	23	4880	0.42	5.00e-05	PHOX2B,HERC2,EP300,NBN,TINF2,ATM,MITF,TERT,TUBB3,MRE11A,PURA,ATR,VCP,ASPM,ATRX,AR,FANCG,BRCA2,PDX1,BRPF1,PAX6,BRCA1,RECQL4
GO Component	GO:0030870	Mre11 complex	2	3	2.57	0.0028	NBN,MRE11A
GO Component	GO:0035861	Site of double-strand break	3	60	1.45	0.0156	NBN,MRE11A,VCP
GO Component	GO:0005657	Replication fork	3	64	1.42	0.0176	NBN,MRE11A,PURA
GO Component	GO:0000783	Nuclear telomere cap complex	2	13	1.93	0.0227	TINF2,TERT
GO Component	GO:0000800	Lateral element	2	14	2023-09-01	0.0227	BRCA2,BRCA1
GO Component	GO:0032991	Protein-containing complex	19	5073	0.32	0.0227	EP300,NBN,TINF2,ATM,MITF,TERT,MRE11A,PURA,VCP,PARK2,AR,FANCG,BRCA2,BRPF1,FANCA,ELP4,BRCA1,LARP7,WWOX
GO Component	GO:0043240	Fanconi anaemia nuclear complex	2	13	1.93	0.0227	FANCG,FANCA
GO Component	GO:0032993	protein-DNA complex	4	195	2023-06-01	0.0239	EP300,TINF2,TERT,PURA
GO Component	GO:0005737	Cytoplasm	30	11428	0.17	0.0272	HERC2,EP300,NBN,ATM,PIEZO1,TERT,FANCI,TUBB3,MRE11A,PURA,ATR,OCA2,VCP,PARK2,ASPM,PTEN,AR,FANCG,BRCA2,PDX1,BRPF1,FANCA,ELP4,PRF1,PAX6,GDNF,BRCA1,LARP7,WWOX,RECQL4
GO Component	GO:0000794	Condensed nuclear chromosome	3	103	1.21	0.0457	ATRX,BRCA2,BRCA1
Reactome
Reactome	HSA-73894	DNA Repair	13	309	1.37	1.16e-11	HERC2,EP300,NBN,TINF2,ATM,FANCI,MRE11A,ATR,VCP,FANCG,BRCA2,FANCA,BRCA1
Reactome	HSA-5693616	Presynaptic phase of homologous DNA pairing and strand exchange	6	38	1.95	1.51e-07	NBN,ATM,MRE11A,ATR,BRCA2,BRCA1
Reactome	HSA-1500620	Meiosis	7	87	1.65	1.52e-07	NBN,TINF2,ATM,MRE11A,ATR,BRCA2,BRCA1
Reactome	HSA-1640170	Cell Cycle	12	647	2023-02-01	3.37e-07	HERC2,EP300,NBN,TINF2,ATM,TERT,TUBB3,MRE11A,ATR,ATRX,BRCA2,BRCA1
Reactome	HSA-5693554	Resolution of D-loop Structures through Synthesis-Dependent Strand Annealing (SDSA)	5	25	2023-05-02	5.71e-07	NBN,ATM,MRE11A,BRCA2,BRCA1
Reactome	HSA-5693567	HDR through Homologous Recombination (HRR) or Single Strand Annealing (SSA)	7	113	1.54	5.71e-07	HERC2,NBN,ATM,MRE11A,ATR,BRCA2,BRCA1
Reactome	HSA-5693568	Resolution of D-loop Structures through Holliday Junction Intermediates	5	31	1.96	9.64e-07	NBN,ATM,MRE11A,BRCA2,BRCA1
Reactome	HSA-69473	G2/M DNA damage checkpoint	6	78	1.63	1.27e-06	HERC2,NBN,ATM,MRE11A,ATR,BRCA1
Reactome	HSA-5685938	HDR through Single Strand Annealing (SSA)	5	36	1.89	1.46e-06	NBN,ATM,MRE11A,ATR,BRCA1
Reactome	HSA-5693607	Processing of DNA double-strand break ends	6	81	1.62	1.46e-06	HERC2,NBN,ATM,MRE11A,ATR,BRCA1
Reactome	HSA-3700989	Transcriptional Regulation by TP53	9	363	1.14	1.69e-06	EP300,NBN,ATM,FANCI,MRE11A,ATR,PTEN,BRPF1,BRCA1
Reactome	HSA-5633007	Regulation of TP53 Activity	7	159	1.39	1.83e-06	EP300,NBN,ATM,MRE11A,ATR,BRPF1,BRCA1
Reactome	HSA-5693571	Nonhomologous End-Joining (NHEJ)	5	52	1.73	6.03e-06	HERC2,NBN,ATM,MRE11A,BRCA1
Reactome	HSA-912446	Meiotic recombination	5	55	1.71	7.45e-06	NBN,ATM,MRE11A,BRCA2,BRCA1
Reactome	HSA-5693565	Recruitment and ATM-mediated phosphorylation of repair and signaling proteins at DNA double strand breaks	5	60	1.67	1.07e-05	HERC2,NBN,ATM,MRE11A,BRCA1
Reactome	HSA-2262752	Cellular responses to stress	9	544	0.97	3.52e-05	EP300,NBN,TINF2,ATM,TUBB3,MRE11A,ATR,VCP,AR
Reactome	HSA-5693548	Sensing of DNA Double Strand Breaks	3	6	2.45	3.78e-05	NBN,ATM,MRE11A
Reactome	HSA-6804756	Regulation of TP53 Activity through Phosphorylation	5	92	1.48	6.21e-05	NBN,ATM,MRE11A,ATR,BRCA1
Reactome	HSA-6783310	Fanconi Anemia Pathway	4	37	1.78	6.38e-05	FANCI,ATR,FANCG,FANCA
Reactome	HSA-212436	Generic Transcription Pathway	11	1197	0.71	0.00037	EP300,NBN,ATM,FANCI,MRE11A,ATR,PTEN,AR,BRPF1,BRCA1,WWOX
Reactome	HSA-2559586	DNA Damage/Telomere Stress Induced Senescence	4	61	1.56	0.00039	NBN,TINF2,ATM,MRE11A
Reactome	HSA-6796648	TP53 Regulates Transcription of DNA Repair Genes	4	65	1.54	0.00048	ATM,FANCI,ATR,BRCA1
Reactome	HSA-5688426	Deubiquitination	6	280	2023-08-01	0.00069	EP300,VCP,PARK2,PTEN,AR,BRCA1
Reactome	HSA-3108232	SUMO E3 ligases SUMOylate target proteins	5	166	1.23	0.00078	HERC2,EP300,MITF,AR,BRCA1
Reactome	HSA-9663891	Selective autophagy	4	80	1.45	0.00089	ATM,TUBB3,VCP,PARK2
Reactome	HSA-3371556	Cellular response to heat stress	4	89	2023-04-01	0.0013	EP300,ATM,ATR,VCP
Reactome	HSA-186712	Regulation of beta-cell development	3	42	2023-06-01	0.0038	EP300,PDX1,PAX6
Reactome	HSA-9646399	Aggrephagy	3	42	2023-06-01	0.0038	TUBB3,VCP,PARK2
Reactome	HSA-1221632	Meiotic synapsis	3	60	1.45	0.0095	TINF2,ATR,BRCA1
Reactome	HSA-5685939	HDR through MMEJ (alt-NHEJ)	2	10	2023-05-02	0.0098	NBN,MRE11A
Reactome	HSA-5689877	Josephin domain DUBs	2	12	1.97	0.0129	VCP,PARK2
Reactome	HSA-8866907	Activation of the TFAP2 (AP-2) family of transcription factors	2	12	1.97	0.0129	EP300,WWOX
Reactome	HSA-597592	Post-translational protein modification	9	1390	0.56	0.0268	HERC2,EP300,MITF,TUBB3,VCP,PARK2,PTEN,AR,BRCA1
Reactome	HSA-157579	Telomere Maintenance	3	92	1.26	0.0277	TINF2,TERT,ATRX
Reactome	HSA-6804760	Regulation of TP53 Activity through Methylation	2	19	1.77	0.0277	EP300,ATM
Reactome	HSA-210745	Regulation of gene expression in beta cells	2	21	1.73	0.0320	PDX1,PAX6
Reactome	HSA-171319	Telomere Extension By Telomerase	2	22	1.71	0.0342	TINF2,TERT
Reactome	HSA-3214847	HATs acetylate histones	3	107	2023-02-01	0.0397	EP300,BRPF1,ELP4

## Sheet: Enrichment subnetwork3 shared
#category	term ID	term description	observed gene count	background gene count	strength	false discovery rate	matching proteins in your network (labels)
GO Biological Process
GO Process	GO:0019752	Carboxylic acid metabolic process	18	853	1.27	3.10e-17	ACO2,GCDH,SDHA,MCCC1,MMAA,HPDL,MCCC2,ECHS1,ACADSB,DPYD,ACADM,ALDOB,PCCA,HADHA,HLCS,BTD,PCCB,ACSF3
GO Process	GO:0032787	Monocarboxylic acid metabolic process	14	515	1.38	7.81e-14	GCDH,MCCC1,MMAA,MCCC2,ECHS1,ACADSB,ACADM,ALDOB,PCCA,HADHA,HLCS,BTD,PCCB,ACSF3
GO Process	GO:0044282	Small molecule catabolic process	13	424	1.44	3.03e-13	GCDH,MCCC1,MMAA,MCCC2,ECHS1,ACADSB,DPYD,ACADM,ALDOB,PCCA,HADHA,PCCB,ACSF3
GO Process	GO:0046395	Carboxylic acid catabolic process	11	260	1.58	3.28e-12	GCDH,MCCC1,MMAA,MCCC2,ECHS1,ACADSB,ACADM,PCCA,HADHA,PCCB,ACSF3
GO Process	GO:0006768	Biotin metabolic process	6	9	2.77	6.76e-12	MCCC1,MCCC2,PCCA,HLCS,BTD,PCCB
GO Process	GO:0006767	Water-soluble vitamin metabolic process	7	83	1.88	7.06e-09	MCCC1,MMAA,MCCC2,PCCA,HLCS,BTD,PCCB
GO Process	GO:0009062	Fatty acid catabolic process	7	93	1.83	1.37e-08	GCDH,MMAA,ECHS1,ACADM,PCCA,HADHA,PCCB
GO Process	GO:0006631	Fatty acid metabolic process	9	311	1.41	3.27e-08	GCDH,MMAA,ECHS1,ACADSB,ACADM,PCCA,HADHA,PCCB,ACSF3
GO Process	GO:0055114	Oxidation-reduction process	12	939	2023-06-01	6.06e-08	ACO2,GCDH,NDUFB3,SDHA,NDUFAF2,HPDL,ECHS1,ACADSB,DPYD,ACADM,ALDOB,HADHA
GO Process	GO:0006790	Sulfur compound metabolic process	8	355	2023-03-01	2.48e-06	GCDH,MCCC1,MCCC2,PCCA,HLCS,BTD,PCCB,ACSF3
GO Process	GO:1901575	Organic substance catabolic process	13	1750	0.82	3.98e-06	GCDH,MCCC1,MMAA,MCCC2,ECHS1,ACADSB,DPYD,ACADM,ALDOB,PCCA,HADHA,PCCB,ACSF3
GO Process	GO:0044237	Cellular metabolic process	21	7513	0.4	1.79e-05	ACO2,GCDH,NDUFB3,SDHA,MCCC1,MMAA,NDUFAF2,HPDL,MCCC2,ECHS1,ACADSB,DPYD,ACADM,ALDOB,PCCA,HADHA,HLCS,BTD,EHMT1,PCCB,ACSF3
GO Process	GO:0044248	Cellular catabolic process	12	1758	0.78	4.56e-05	GCDH,MCCC1,MMAA,MCCC2,ECHS1,ACADSB,DPYD,ACADM,PCCA,HADHA,PCCB,ACSF3
GO Process	GO:0019626	Short-chain fatty acid catabolic process	3	9	2.47	0.00014	MMAA,PCCA,PCCB
GO Process	GO:0006520	Cellular amino acid metabolic process	6	278	1.28	0.00027	GCDH,MCCC1,HPDL,MCCC2,ACADSB,DPYD
GO Process	GO:0006635	Fatty acid beta-oxidation	4	56	2023-08-01	0.00027	GCDH,ECHS1,ACADM,HADHA
GO Process	GO:0043603	Cellular amide metabolic process	8	773	0.96	0.00055	GCDH,MCCC1,MCCC2,PCCA,HLCS,BTD,PCCB,ACSF3
GO Process	GO:0009083	Branched-chain amino acid catabolic process	3	22	2023-08-02	0.0011	MCCC1,MCCC2,ACADSB
GO Process	GO:1901360	Organic cyclic compound metabolic process	13	3118	0.57	0.0019	GCDH,MCCC1,MMAA,HPDL,MCCC2,DPYD,ALDOB,PCCA,HLCS,BTD,EHMT1,PCCB,ACSF3
GO Process	GO:0071704	Organic substance metabolic process	19	7755	0.34	0.0031	ACO2,GCDH,SDHA,MCCC1,MMAA,HPDL,MCCC2,ECHS1,ACADSB,DPYD,ACADM,ALDOB,PCCA,HADHA,HLCS,BTD,EHMT1,PCCB,ACSF3
GO Process	GO:0009063	Cellular amino acid catabolic process	4	124	1.46	0.0040	GCDH,MCCC1,MCCC2,ACADSB
GO Process	GO:0046483	Heterocycle metabolic process	12	2840	0.57	0.0046	GCDH,MCCC1,MMAA,MCCC2,DPYD,ALDOB,PCCA,HLCS,BTD,EHMT1,PCCB,ACSF3
GO Process	GO:0044238	Primary metabolic process	18	7332	0.34	0.0090	ACO2,GCDH,SDHA,MCCC1,MMAA,HPDL,MCCC2,ECHS1,ACADSB,DPYD,ACADM,ALDOB,PCCA,HADHA,HLCS,EHMT1,PCCB,ACSF3
GO Process	GO:0045333	Cellular respiration	4	158	1.35	0.0094	ACO2,NDUFB3,SDHA,NDUFAF2
GO Process	GO:0006552	Leucine catabolic process	2	6	2.47	0.0105	MCCC1,MCCC2
GO Process	GO:0072521	Purine-containing compound metabolic process	5	360	2023-09-01	0.0136	GCDH,MCCC2,DPYD,ALDOB,ACSF3
GO Process	GO:0032981	Mitochondrial respiratory chain complex i assembly	3	66	1.61	0.0178	NDUFB3,NDUFAF2,TMEM126B
GO Process	GO:0034641	Cellular nitrogen compound metabolic process	12	3282	0.51	0.0178	GCDH,MCCC1,MCCC2,DPYD,ACADM,ALDOB,PCCA,HLCS,BTD,EHMT1,PCCB,ACSF3
GO Process	GO:1901564	Organonitrogen compound metabolic process	15	5244	0.41	0.0178	GCDH,MCCC1,MMAA,HPDL,MCCC2,ACADSB,DPYD,ACADM,ALDOB,PCCA,HLCS,BTD,EHMT1,PCCB,ACSF3
GO Process	GO:0006091	Generation of precursor metabolites and energy	5	405	2023-04-01	0.0206	ACO2,NDUFB3,SDHA,NDUFAF2,ALDOB
GO Process	GO:0033539	Fatty acid beta-oxidation using acyl-coa dehydrogenase	2	10	2.25	0.0207	GCDH,ACADM
GO Molecular Function
GO Function	GO:0003824	Catalytic activity	21	5486	0.53	1.36e-07	ACO2,GCDH,NDUFB3,SDHA,MCCC1,MMAA,NDUFAF2,HPDL,MCCC2,ECHS1,ACADSB,DPYD,ACADM,ALDOB,PCCA,HADHA,HLCS,BTD,EHMT1,PCCB,ACSF3
GO Function	GO:0016421	CoA carboxylase activity	4	6	2.77	4.04e-07	MCCC1,MCCC2,PCCA,PCCB
GO Function	GO:0016627	Oxidoreductase activity, acting on the ch-ch group of donors	5	59	1.88	6.48e-06	GCDH,SDHA,ACADSB,DPYD,ACADM
GO Function	GO:0016874	Ligase activity	6	156	1.53	1.26e-05	MCCC1,MCCC2,PCCA,HLCS,PCCB,ACSF3
GO Function	GO:0000166	Nucleotide binding	13	2119	0.74	2.06e-05	GCDH,SDHA,MCCC1,MMAA,MCCC2,ACADSB,DPYD,ACADM,PCCA,HADHA,HLCS,PCCB,ACSF3
GO Function	GO:0009374	Biotin binding	3	5	2.73	2.06e-05	MCCC1,PCCA,HLCS
GO Function	GO:0016491	Oxidoreductase activity	9	726	2023-04-01	2.06e-05	GCDH,NDUFB3,SDHA,NDUFAF2,HPDL,ACADSB,DPYD,ACADM,HADHA
GO Function	GO:0036094	Small molecule binding	14	2516	0.69	2.06e-05	GCDH,SDHA,MCCC1,MMAA,MCCC2,ACADSB,DPYD,ACADM,ALDOB,PCCA,HADHA,HLCS,PCCB,ACSF3
GO Function	GO:0050660	Flavin adenine dinucleotide binding	5	82	1.73	2.06e-05	GCDH,SDHA,ACADSB,DPYD,ACADM
GO Function	GO:0003995	acyl-CoA dehydrogenase activity	3	11	2.38	0.00012	GCDH,ACADSB,ACADM
GO Function	GO:0043168	Anion binding	13	2805	0.62	0.00038	GCDH,SDHA,MCCC1,MMAA,MCCC2,ACADSB,DPYD,ACADM,PCCA,HADHA,HLCS,PCCB,ACSF3
GO Function	GO:0004485	methylcrotonoyl-CoA carboxylase activity	2	2	2.95	0.0017	MCCC1,MCCC2
GO Function	GO:0004658	propionyl-CoA carboxylase activity	2	2	2.95	0.0017	PCCA,PCCB
GO Function	GO:1901681	Sulfur compound binding	5	262	1.23	0.0020	GCDH,MCCC1,PCCA,HADHA,HLCS
GO Function	GO:0016836	Hydro-lyase activity	3	57	1.67	0.0077	ACO2,ECHS1,HADHA
GO Function	GO:0016829	Lyase activity	4	184	1.29	0.0090	ACO2,ECHS1,ALDOB,HADHA
GO Function	GO:0033218	Amide binding	5	369	2023-08-01	0.0090	GCDH,MCCC1,PCCA,HADHA,HLCS
GO Function	GO:0004300	enoyl-CoA hydratase activity	2	9	2023-03-02	0.0107	ECHS1,HADHA
GO Function	GO:0043167	Ion binding	16	6188	0.36	0.0129	ACO2,GCDH,SDHA,MCCC1,MMAA,HPDL,MCCC2,ACADSB,DPYD,ACADM,PCCA,HADHA,HLCS,EHMT1,PCCB,ACSF3
GO Function	GO:0032555	Purine ribonucleotide binding	9	1864	0.63	0.0138	GCDH,MCCC1,MMAA,MCCC2,PCCA,HADHA,HLCS,PCCB,ACSF3
GO Function	GO:0032559	Adenyl ribonucleotide binding	8	1522	0.67	0.0193	GCDH,MCCC1,MCCC2,PCCA,HADHA,HLCS,PCCB,ACSF3
GO Function	GO:0000062	fatty-acyl-CoA binding	2	21	1.93	0.0335	GCDH,HADHA
GO Cellular Component
GO Component	GO:0005739	Mitochondrion	18	1611	1.0	2.98e-13	ACO2,GCDH,NDUFB3,SDHA,MCCC1,MMAA,NDUFAF2,MCCC2,TMEM126B,ECHS1,ACADSB,ACADM,PCCA,HADHA,HLCS,BTD,PCCB,ACSF3
GO Component	GO:0005759	Mitochondrial matrix	13	479	1.38	4.66e-13	ACO2,GCDH,MCCC1,MMAA,MCCC2,ECHS1,ACADSB,ACADM,PCCA,HADHA,BTD,PCCB,ACSF3
GO Component	GO:0002169	3-methylcrotonyl-CoA carboxylase complex, mitochondrial	2	2	2.95	0.0041	MCCC1,MCCC2
GO Component	GO:0098798	Mitochondrial protein complex	5	262	1.23	0.0041	NDUFB3,SDHA,MCCC1,MCCC2,HADHA
GO Component	GO:0070013	Intracellular organelle lumen	16	5857	0.39	0.0123	ACO2,GCDH,SDHA,MCCC1,MMAA,MCCC2,ECHS1,ACADSB,ACADM,PCCA,HADHA,HLCS,BTD,EHMT1,PCCB,ACSF3
GO Component	GO:0031966	Mitochondrial membrane	6	722	0.87	0.0218	NDUFB3,SDHA,NDUFAF2,TMEM126B,ACADM,HADHA
GO Component	GO:0005743	Mitochondrial inner membrane	5	480	0.97	0.0271	NDUFB3,SDHA,NDUFAF2,TMEM126B,HADHA
Reactome
Reactome	HSA-1430728	Metabolism	20	2089	0.93	1.64e-14	ACO2,GCDH,NDUFB3,SDHA,MCCC1,MMAA,NDUFAF2,MCCC2,TMEM126B,ECHS1,ACADSB,DPYD,ACADM,ALDOB,PCCA,HADHA,HLCS,BTD,PCCB,ACSF3
Reactome	HSA-3296482	Defects in vitamin and cofactor metabolism	7	22	2.45	1.30e-12	MCCC1,MMAA,MCCC2,PCCA,HLCS,BTD,PCCB
Reactome	HSA-3323169	Defects in biotin (Btn) metabolism	6	8	2.82	2.06e-12	MCCC1,MCCC2,PCCA,HLCS,BTD,PCCB
Reactome	HSA-196780	Biotin transport and metabolism	6	11	2.69	6.35e-12	MCCC1,MCCC2,PCCA,HLCS,BTD,PCCB
Reactome	HSA-3371599	Defective HLCS causes multiple carboxylase deficiency	5	7	2023-08-02	3.75e-10	MCCC1,MCCC2,PCCA,HLCS,PCCB
Reactome	HSA-77289	Mitochondrial Fatty Acid Beta-Oxidation	6	37	2.16	2.05e-09	MMAA,ECHS1,ACADM,PCCA,HADHA,PCCB
Reactome	HSA-196849	Metabolism of water-soluble vitamins and cofactors	7	123	2023-07-01	2.35e-08	MCCC1,MMAA,MCCC2,PCCA,HLCS,BTD,PCCB
Reactome	HSA-5668914	Diseases of metabolism	8	244	1.46	4.99e-08	MCCC1,MMAA,MCCC2,ALDOB,PCCA,HLCS,BTD,PCCB
Reactome	HSA-8978868	Fatty acid metabolism	7	175	1.55	1.95e-07	MMAA,ECHS1,ACADM,PCCA,HADHA,PCCB,ACSF3
Reactome	HSA-70895	Branched-chain amino acid catabolism	4	21	2.23	2.93e-06	MCCC1,MCCC2,ECHS1,ACADSB
Reactome	HSA-71032	Propionyl-CoA catabolism	3	5	2.73	1.24e-05	MMAA,PCCA,PCCB
Reactome	HSA-77348	Beta oxidation of octanoyl-CoA to hexanoyl-CoA	3	5	2.73	1.24e-05	ECHS1,ACADM,HADHA
Reactome	HSA-77346	Beta oxidation of decanoyl-CoA to octanoyl-CoA-CoA	3	6	2.65	1.60e-05	ECHS1,ACADM,HADHA
Reactome	HSA-1428517	The citric acid (TCA) cycle and respiratory electron transport	5	176	2023-04-01	0.00020	ACO2,NDUFB3,SDHA,NDUFAF2,TMEM126B
Reactome	HSA-611105	Respiratory electron transport	4	101	1.55	0.00068	NDUFB3,SDHA,NDUFAF2,TMEM126B
Reactome	HSA-77310	Beta oxidation of lauroyl-CoA to decanoyl-CoA-CoA	2	5	2.55	0.0027	ECHS1,HADHA
Reactome	HSA-77350	Beta oxidation of hexanoyl-CoA to butanoyl-CoA	2	5	2.55	0.0027	ECHS1,HADHA
Reactome	HSA-77288	Mitochondrial fatty acid beta-oxidation of unsaturated fatty acids	2	6	2.47	0.0033	ACADM,HADHA
Reactome	HSA-6799198	Complex I biogenesis	3	55	1.69	0.0034	NDUFB3,NDUFAF2,TMEM126B
Reactome	HSA-71291	Metabolism of amino acids and derivatives	5	365	2023-09-01	0.0043	GCDH,MCCC1,MCCC2,ECHS1,ACADSB
Reactome	HSA-71403	Citric acid cycle (TCA cycle)	2	22	1.91	0.0274	ACO2,SDHA

## Sheet: MCL cluster specific cluster14
#clustering method	cluster number	cluster color	gene count	protein name	protein identifier	protein description
MCL	1	Red	19	ARID1B	9606.ENSP00000344546	AT-rich interactive domain-containing protein 1B; Involved in transcriptional activation and repression of select genes by chromatin remodeling (alteration of DNA-nucleosome topology). Component of SWI/SNF chromatin remodeling complexes that carry out key enzymatic activities, changing chromatin structure by altering DNA-histone contacts within a nucleosome in an ATP-dependent manner. Belongs to …
MCL	1	Red	19	CACNA1B	9606.ENSP00000360423	Voltage-dependent N-type calcium channel subunit alpha-1B; Voltage-sensitive calcium channels (VSCC) mediate the entry of calcium ions into excitable cells and are also involved in a variety of calcium-dependent processes, including muscle contraction, hormone or neurotransmitter release, gene expression, cell motility, cell division and cell death. The isoform alpha-1B gives rise to N-type calci…
MCL	1	Red	19	CDC42BPB	9606.ENSP00000355237	Serine/threonine-protein kinase MRCK beta; Serine/threonine-protein kinase which is an important downstream effector of CDC42 and plays a role in the regulation of cytoskeleton reorganization and cell migration. Regulates actin cytoskeletal reorganization via phosphorylation of PPP1R12C and MYL9/MLC2. In concert with MYO18A and LURAP1, is involved in modulating lamellar actomyosin retrograde flow…
MCL	1	Red	19	COL11A2	9606.ENSP00000363840	Collagen alpha-2(XI) chain; May play an important role in fibrillogenesis by controlling lateral growth of collagen II fibrils; Collagens
MCL	1	Red	19	COL4A3BP	9606.ENSP00000369862	Collagen type IV alpha-3-binding protein; Shelters ceramides and diacylglycerol lipids inside its START domain and mediates the intracellular trafficking of ceramides and diacylglycerol lipids in a non-vesicular manner; Pleckstrin homology domain containing
MCL	1	Red	19	DNM1	9606.ENSP00000362014	Dynamin-1; Microtubule-associated force-producing protein involved in producing microtubule bundles and able to bind and hydrolyze GTP. Most probably involved in vesicular trafficking processes. Involved in receptor-mediated endocytosis; Pleckstrin homology domain containing
MCL	1	Red	19	EEF1A2	9606.ENSP00000217182	Elongation factor 1-alpha 2; This protein promotes the GTP-dependent binding of aminoacyl-tRNA to the A-site of ribosomes during protein biosynthesis; Belongs to the TRAFAC class translation factor GTPase superfamily. Classic translation factor GTPase family. EF-Tu/EF-1A subfamily
MCL	1	Red	19	GABRB3	9606.ENSP00000308725	Gamma-aminobutyric acid receptor subunit beta-3; Component of the heteropentameric receptor for GABA, the major inhibitory neurotransmitter in the vertebrate brain. Functions also as histamine receptor and mediates cellular responses to histamine. Functions as receptor for diazepines and various anesthetics, such as pentobarbital; these are bound at a separate allosteric effector binding site. Fu…
MCL	1	Red	19	GPSM2	9606.ENSP00000385510	G-protein-signaling modulator 2; Plays an important role in mitotic spindle pole organization via its interaction with NUMA1. Required for cortical dynein- dynactin complex recruitment during metaphase. Plays a role in metaphase spindle orientation. Plays also an important role in asymmetric cell divisions. Has guanine nucleotide dissociation inhibitor (GDI) activity towards G(i) alpha proteins, …
MCL	1	Red	19	IQSEC2	9606.ENSP00000379712	IQ motif and SEC7 domain-containing protein 2; Is a guanine nucleotide exchange factor for the ARF GTP- binding proteins; X-linked mental retardation
MCL	1	Red	19	KCNQ2	9606.ENSP00000352035	Potassium voltage-gated channel subfamily KQT member 2; Associates with KCNQ3 to form a potassium channel with essentially identical properties to the channel underlying the native M-current, a slowly activating and deactivating potassium conductance which plays a critical role in determining the subthreshold electrical excitability of neurons as well as the responsiveness to synaptic inputs. The…
MCL	1	Red	19	PRDX1	9606.ENSP00000262746	Peroxiredoxin-1; Thiol-specific peroxidase that catalyzes the reduction of hydrogen peroxide and organic hydroperoxides to water and alcohols, respectively. Plays a role in cell protection against oxidative stress by detoxifying peroxides and as sensor of hydrogen peroxide-mediated signaling events. Might participate in the signaling cascades of growth factors and tumor necrosis factor-alpha by r…
MCL	1	Red	19	SCN4A	9606.ENSP00000396320	Sodium channel protein type 4 subunit alpha; This protein mediates the voltage-dependent sodium ion permeability of excitable membranes. Assuming opened or closed conformations in response to the voltage difference across the membrane, the protein forms a sodium-selective channel through which Na(+) ions may pass in accordance with their electrochemical gradient. This sodium channel may be presen…
MCL	1	Red	19	SLC6A1	9606.ENSP00000287766	Sodium- and chloride-dependent GABA transporter 1; Terminates the action of GABA by its high affinity sodium-dependent reuptake into presynaptic terminals; Belongs to the sodium:neurotransmitter symporter (SNF) (TC 2.A.22) family. SLC6A1 subfamily
MCL	1	Red	19	SPTBN2	9606.ENSP00000432568	Spectrin beta chain, non-erythrocytic 2; Probably plays an important role in neuronal membrane skeleton; Belongs to the spectrin family
MCL	1	Red	19	STAC3	9606.ENSP00000329200	SH3 and cysteine-rich domain-containing protein 3; In skeletal muscles contraction, may play a role in neuromuscular synaptic transmission
MCL	1	Red	19	SYNGAP1	9606.ENSP00000403636	Ras/Rap GTPase-activating protein SynGAP; Major constituent of the PSD essential for postsynaptic signaling. Inhibitory regulator of the Ras-cAMP pathway. Member of the NMDAR signaling complex in excitatory synapses, it may play a role in NMDAR-dependent control of AMPAR potentiation, AMPAR membrane trafficking and synaptic plasticity. Regulates AMPAR- mediated miniature excitatory postsynaptic c…
MCL	1	Red	19	TSC2	9606.ENSP00000219476	Tuberin; In complex with TSC1, this tumor suppressor inhibits the nutrient-mediated or growth factor-stimulated phosphorylation of S6K1 and EIF4EBP1 by negatively regulating mTORC1 signaling. Acts as a GTPase-activating protein (GAP) for the small GTPase RHEB, a direct activator of the protein kinase activity of mTORC1. May also play a role in microtubule-mediated protein transport. Also stimulat…
MCL	1	Red	19	UBE3A	9606.ENSP00000232165	Ubiquitin-protein ligase E3A; E3 ubiquitin-protein ligase which accepts ubiquitin from an E2 ubiquitin-conjugating enzyme in the form of a thioester and transfers it to its substrates. Several substrates have been identified including the RAD23A and RAD23B, MCM7 (which is involved in DNA replication), annexin A1, the PML tumor suppressor, and the cell cycle regulator CDKN1B. Catalyzes the high-ri…
MCL	2	Brown	10	BLM	9606.ENSP00000347232	Bloom syndrome protein; ATP-dependent DNA helicase that unwinds single- and double-stranded DNA in a 3'-5' direction. Participates in DNA replication and repair. Involved in 5'-end resection of DNA during double-strand break (DSB) repair: unwinds DNA and recruits DNA2 which mediates the cleavage of 5'-ssDNA. Negatively regulates sister chromatid exchange (SCE). Stimulates DNA 4-way junction branc…
MCL	2	Brown	10	BRIP1	9606.ENSP00000259008	BRCA1 interacting protein C-terminal helicase 1; Fanconi anemia group J protein; DNA-dependent ATPase and 5' to 3' DNA helicase required for the maintenance of chromosomal stability. Acts late in the Fanconi anemia pathway, after FANCD2 ubiquitination. Involved in the repair of DNA double-strand breaks by homologous recombination in a manner that depends on its association with BRCA1
MCL	2	Brown	10	BUB1B	9606.ENSP00000287598	Mitotic checkpoint serine/threonine-protein kinase BUB1 beta; Essential component of the mitotic checkpoint. Required for normal mitosis progression. The mitotic checkpoint delays anaphase until all chromosomes are properly attached to the mitotic spindle. One of its checkpoint functions is to inhibit the activity of the anaphase-promoting complex/cyclosome (APC/C) by blocking the binding of CDC2…
MCL	2	Brown	10	CDC45	9606.ENSP00000405726	Cell division control protein 45 homolog; Required for initiation of chromosomal DNA replication
MCL	2	Brown	10	DNA2	9606.ENSP00000351185	DNA replication ATP-dependent helicase/nuclease DNA2; Key enzyme involved in DNA replication and DNA repair in nucleus and mitochondrion. Involved in Okazaki fragments processing by cleaving long flaps that escape FEN1: flaps that are longer than 27 nucleotides are coated by replication protein A complex (RPA), leading to recruit DNA2 which cleaves the flap until it is too short to bind RPA and b…
MCL	2	Brown	10	ERCC2	9606.ENSP00000375809	TFIIH basal transcription factor complex helicase XPD subunit; ATP-dependent 5'-3' DNA helicase, component of the core- TFIIH basal transcription factor. Involved in nucleotide excision repair (NER) of DNA by opening DNA around the damage, and in RNA transcription by RNA polymerase II by anchoring the CDK-activating kinase (CAK) complex, composed of CDK7, cyclin H and MAT1, to the core-TFIIH comp…
MCL	2	Brown	10	FANCE	9606.ENSP00000229769	Fanconi anemia group E protein; As part of the Fanconi anemia (FA) complex functions in DNA cross-links repair. Required for the nuclear accumulation of FANCC and provides a critical bridge between the FA complex and FANCD2
MCL	2	Brown	10	FANCF	9606.ENSP00000330875	Fanconi anemia group F protein; DNA repair protein that may operate in a postreplication repair or a cell cycle checkpoint function. May be implicated in interstrand DNA cross-link repair and in the maintenance of normal chromosome stability (By similarity); Fanconi anemia complementation groups
MCL	2	Brown	10	PPP2R5D	9606.ENSP00000417963	Serine/threonine-protein phosphatase 2A 56 kDa regulatory subunit delta isoform; The B regulatory subunit might modulate substrate selectivity and catalytic activity, and also might direct the localization of the catalytic enzyme to a particular subcellular compartment; Belongs to the phosphatase 2A regulatory subunit B56 family
MCL	2	Brown	10	PRKAR1A	9606.ENSP00000376475	cAMP-dependent protein kinase type I-alpha regulatory subunit; Regulatory subunit of the cAMP-dependent protein kinases involved in cAMP signaling in cells
MCL	3	Dark Golden Rod	7	CC2D2A	9606.ENSP00000403465	Coiled-coil and C2 domain-containing protein 2A; Component of the tectonic-like complex, a complex localized at the transition zone of primary cilia and acting as a barrier that prevents diffusion of transmembrane proteins between the cilia and plasma membranes. Required for ciliogenesis and sonic hedgehog/SHH signaling (By similarity)
MCL	3	Dark Golden Rod	7	CERKL	9606.ENSP00000341159	Ceramide kinase-like protein; Has no detectable ceramide-kinase activity. Overexpression of CERKL protects cells from apoptosis in oxidative stress conditions
MCL	3	Dark Golden Rod	7	IQCB1	9606.ENSP00000311505	IQ calmodulin-binding motif-containing protein 1; Involved in ciliogenesis. The function in an early step in cilia formation depends on its association with CEP290/NPHP6. Involved in regulation of the BBSome complex integrity, specifically for presence of BBS2 and BBS5 in the complex, and in ciliary targeting of selected BBSome cargos. May play a role in controlling entry of the BBSome complex to…
MCL	3	Dark Golden Rod	7	MERTK	9606.ENSP00000295408	Tyrosine-protein kinase Mer; Receptor tyrosine kinase that transduces signals from the extracellular matrix into the cytoplasm by binding to several ligands including LGALS3, TUB, TULP1 or GAS6. Regulates many physiological processes including cell survival, migration, differentiation, and phagocytosis of apoptotic cells (efferocytosis). Ligand binding at the cell surface induces autophosphorylat…
MCL	3	Dark Golden Rod	7	RDH12	9606.ENSP00000449079	Retinol dehydrogenase 12; Exhibits an oxidoreductive catalytic activity towards retinoids. Most efficient as an NADPH-dependent retinal reductase. Displays high activity toward 9-cis and all-trans-retinol. Also involved in the metabolism of short-chain aldehydes. No steroid dehydrogenase activity detected. Might be the key enzyme in the formation of 11-cis-retinal from 11-cis-retinol during regen…
MCL	3	Dark Golden Rod	7	RPGRIP1L	9606.ENSP00000369257	Protein fantom; Negatively regulates signaling through the G-protein coupled thromboxane A2 receptor (TBXA2R). May be involved in mechanisms like programmed cell death, craniofacial development, patterning of the limbs, and formation of the left- right axis (By similarity). Involved in the organization of apical junctions; the function is proposed to implicate a NPHP1-4-8 module. Does not seem to…
MCL	3	Dark Golden Rod	7	TTC8	9606.ENSP00000482306	Tetratricopeptide repeat protein 8; The BBSome complex is thought to function as a coat complex required for sorting of specific membrane proteins to the primary cilia. The BBSome complex is required for ciliogenesis but is dispensable for centriolar satellite function. This ciliogenic function is mediated in part by the Rab8 GDP/GTP exchange factor, which localizes to the basal body and contacts…
MCL	4	Yellow	6	APOE	9606.ENSP00000252486	Apolipoprotein E; Mediates the binding, internalization, and catabolism of lipoprotein particles. It can serve as a ligand for the LDL (apo B/E) receptor and for the specific apo-E receptor (chylomicron remnant) of hepatic tissues; Apolipoproteins
MCL	4	Yellow	6	B3GALNT2	9606.ENSP00000355559	UDP-GalNAc:beta-1,3-N-acetylgalactosaminyltransferase 2; Beta-1,3-N-acetylgalactosaminyltransferase that synthesizes a unique carbohydrate structure, GalNAc-beta-1- 3GlcNAc, on N- and O-glycans. Has no galactose nor galactosaminyl transferase activity toward any acceptor substrate. Involved in alpha-dystroglycan (DAG1) glycosylation: acts coordinately with GTDC2/POMGnT2 to synthesize a GalNAc-bet…
MCL	4	Yellow	6	DMPK	9606.ENSP00000345997	Dystrophia myotonica-protein kinase; Myotonin-protein kinase; Non-receptor serine/threonine protein kinase which is necessary for the maintenance of skeletal muscle structure and function. May play a role in myocyte differentiation and survival by regulating the integrity of the nuclear envelope and the expression of muscle-specific genes. May also phosphorylate PPP1R12A and inhibit the myosin ph…
MCL	4	Yellow	6	FKRP	9606.ENSP00000326570	Fukutin-related protein; Transferase involved in the biosynthesis of the phosphorylated O-mannosyl trisaccharide (N-acetylgalactosamine- beta-3-N-acetylglucosamine-beta-4-(phosphate-6-)mannose), a carbohydrate structure present in alpha-dystroglycan (DAG1), which is required for binding laminin G-like domain-containing extracellular proteins with high affinity
MCL	4	Yellow	6	LMNA	9606.ENSP00000357283	Prelamin-A/C; Lamins are components of the nuclear lamina, a fibrous layer on the nucleoplasmic side of the inner nuclear membrane, which is thought to provide a framework for the nuclear envelope and may also interact with chromatin. Lamin A and C are present in equal amounts in the lamina of mammals. Plays an important role in nuclear assembly, chromatin organization, nuclear membrane and telom…
MCL	4	Yellow	6	PUS3	9606.ENSP00000227474	tRNA pseudouridine(38/39) synthase; Formation of pseudouridine at position 39 in the anticodon stem and loop of transfer RNAs; Belongs to the tRNA pseudouridine synthase TruA family
MCL	5	Olive	6	ADSL	9606.ENSP00000485525	Adenylosuccinate lyase; Catalyzes two non-sequential steps in de novo AMP synthesis: converts (S)-2-(5-amino-1-(5-phospho-D- ribosyl)imidazole-4-carboxamido)succinate (SAICAR) to fumarate plus 5-amino-1-(5-phospho-D-ribosyl)imidazole-4-carboxamide, and thereby also contributes to de novo IMP synthesis, and converts succinyladenosine monophosphate (SAMP) to AMP and fumarate; Belongs to the lyase 1…
MCL	5	Olive	6	CPS1	9606.ENSP00000402608	Carbamoyl-phosphate synthase [ammonia], mitochondrial; Involved in the urea cycle of ureotelic animals where the enzyme plays an important role in removing excess ammonia from the cell
MCL	5	Olive	6	DPYS	9606.ENSP00000276651	Dihydropyrimidinase; Catalyzes the second step of the reductive pyrimidine degradation, the reversible hydrolytic ring opening of dihydropyrimidines. Can catalyze the ring opening of 5,6- dihydrouracil to N-carbamyl-alanine and of 5,6-dihydrothymine to N-carbamyl-amino isobutyrate
MCL	5	Olive	6	EDN3	9606.ENSP00000337128	Endothelin-3; Endothelins are endothelium-derived vasoconstrictor peptides; Endogenous ligands
MCL	5	Olive	6	GPI	9606.ENSP00000405573	Glucose-6-phosphate isomerase; Besides it's role as a glycolytic enzyme, mammalian GPI can function as a tumor-secreted cytokine and an angiogenic factor (AMF) that stimulates endothelial cell motility. GPI is also a neurotrophic factor (Neuroleukin) for spinal and sensory neurons
MCL	5	Olive	6	SHMT2	9606.ENSP00000333667	Serine hydroxymethyltransferase, mitochondrial; Contributes to the de novo mitochondrial thymidylate biosynthesis pathway via its role in glycine and tetrahydrofolate metabolism. Thymidylate biosynthesis is required to prevent uracil accumulation in mtDNA. Interconversion of serine and glycine. Associates with mitochondrial DNA. Plays a role in the deubiquitination of target proteins as component…
MCL	6	Green	5	BMP4	9606.ENSP00000245451	Bone morphogenetic protein 4; Induces cartilage and bone formation. Also act in mesoderm induction, tooth development, limb formation and fracture repair. Acts in concert with PTHLH/PTHRP to stimulate ductal outgrowth during embryonic mammary development and to inhibit hair follicle induction (By similarity); Bone morphogenetic proteins
MCL	6	Green	5	FOXG1	9606.ENSP00000339004	Forkhead box protein G1; Transcription repression factor which plays an important role in the establishment of the regional subdivision of the developing brain and in the development of the telencephalon; Forkhead boxes
MCL	6	Green	5	NKX2-1	9606.ENSP00000346879	Homeobox protein Nkx-2.1; Transcription factor that binds and activates the promoter of thyroid specific genes such as thyroglobulin, thyroperoxidase, and thyrotropin receptor. Crucial in the maintenance of the thyroid differentiation phenotype. May play a role in lung development and surfactant homeostasis. Forms a regulatory loop with GRHL2 that coordinates lung epithelial cell morphogenesis an…
MCL	6	Green	5	TSHR	9606.ENSP00000441235	Thyrotropin receptor; Receptor for the thyroid-stimulating hormone (TSH) or thyrotropin. Also acts as a receptor for the heterodimeric glycoprotein hormone (GPHA2:GPHB5) or thyrostimulin. The activity of this receptor is mediated by G proteins which activate adenylate cyclase. Plays a central role in controlling thyroid cell metabolism (By similarity); Belongs to the G-protein coupled receptor 1 …
MCL	6	Green	5	ZIC2	9606.ENSP00000365514	Zinc finger protein ZIC 2; Acts as a transcriptional activator or repressor. Plays important roles in the early stage of organogenesis of the CNS. Activates the transcription of the serotonin transporter SERT in uncrossed ipsilateral retinal ganglion cells (iRGCs) to refine eye-specific projections in primary visual targets. Its transcriptional activity is repressed by MDFIC. Involved in the form…
MCL	7	Forest Green	5	ALDH3A2	9606.ENSP00000345774	Aldehyde dehydrogenase 3 family member a2; Fatty aldehyde dehydrogenase; Catalyzes the oxidation of long-chain aliphatic aldehydes to fatty acids. Active on a variety of saturated and unsaturated aliphatic aldehydes between 6 and 24 carbons in length. Responsible for conversion of the sphingosine 1-phosphate (S1P) degradation product hexadecenal to hexadecenoic acid
MCL	7	Forest Green	5	COASY	9606.ENSP00000464814	Bifunctional coenzyme A synthase; Bifunctional enzyme that catalyzes the fourth and fifth sequential steps of CoA biosynthetic pathway. The fourth reaction is catalyzed by the phosphopantetheine adenylyltransferase, coded by the coaD domain; the fifth reaction is catalyzed by the dephospho-CoA kinase, coded by the coaE domain. May act as a point of CoA biosynthesis regulation; In the central sect…
MCL	7	Forest Green	5	MOCS2	9606.ENSP00000380157	Molybdopterin synthase catalytic subunit; Catalytic subunit of the molybdopterin synthase complex, a complex that catalyzes the conversion of precursor Z into molybdopterin. Acts by mediating the incorporation of 2 sulfur atoms from thiocarboxylated MOCS2A into precursor Z to generate a dithiolene group; Belongs to the MoaE family. MOCS2B subfamily
MCL	7	Forest Green	5	PEX10	9606.ENSP00000288774	Peroxisome biogenesis factor 10; Somewhat implicated in the biogenesis of peroxisomes; Peroxins
MCL	7	Forest Green	5	PEX2	9606.ENSP00000349543	Peroxisome biogenesis factor 2; Somewhat implicated in the biogenesis of peroxisomes; Belongs to the pex2/pex10/pex12 family
MCL	8	Light Green	4	GJA1	9606.ENSP00000282561	Gap junction alpha-1 protein; Gap junction protein that acts as a regulator of bladder capacity. A gap junction consists of a cluster of closely packed pairs of transmembrane channels, the connexons, through which materials of low MW diffuse from one cell to a neighboring cell. May play a critical role in the physiology of hearing by participating in the recycling of potassium to the cochlear end…
MCL	8	Light Green	4	KIF5C	9606.ENSP00000393379	Kinesin heavy chain isoform 5C; Mediates dendritic trafficking of mRNAs (By similarity). Kinesin is a microtubule-associated force-producing protein that may play a role in organelle transport; Belongs to the TRAFAC class myosin-kinesin ATPase superfamily. Kinesin family. Kinesin subfamily
MCL	8	Light Green	4	TBCE	9606.ENSP00000439170	Tubulin-specific chaperone E; Tubulin-folding protein; involved in the second step of the tubulin folding pathway and in the regulation of tubulin heterodimer dissociation. Required for correct organization of microtubule cytoskeleton and mitotic splindle, and maintenance of the neuronal microtubule network
MCL	8	Light Green	4	TUBB2A	9606.ENSP00000369703	Tubulin beta-2A chain; Tubulin is the major constituent of microtubules. It binds two moles of GTP, one at an exchangeable site on the beta chain and one at a non-exchangeable site on the alpha chain (By similarity); Tubulins
MCL	9	Lime Green	3	RAB11B	9606.ENSP00000333547	Ras-related protein Rab-11B; The small GTPases Rab are key regulators of intracellular membrane trafficking, from the formation of transport vesicles to their fusion with membranes. Rabs cycle between an inactive GDP-bound form and an active GTP-bound form that is able to recruit to membranes different set of downstream effectors directly responsible for vesicle formation, movement, tethering and…
MCL	9	Lime Green	3	TRAPPC6B	9606.ENSP00000330289	Trafficking protein particle complex subunit 6B; May play a role in vesicular transport from endoplasmic reticulum to Golgi; Trafficking protein particle complex
MCL	9	Lime Green	3	TRAPPC9	9606.ENSP00000373979	Trafficking protein particle complex subunit 9; Functions as an activator of NF-kappa-B through increased phosphorylation of the IKK complex. May function in neuronal cells differentiation. May play a role in vesicular transport from endoplasmic reticulum to Golgi; Belongs to the NIBP family
MCL	10	Cyan	3	ACAD9	9606.ENSP00000312618	Acyl-CoA dehydrogenase family member 9, mitochondrial; Required for mitochondrial complex I assembly. Has a dehydrogenase activity on palmitoyl-CoA (C16:0) and stearoyl-CoA (C18:0). It is three times more active on palmitoyl-CoA than on stearoyl-CoA. However, it does not play a primary role in long-chain fatty acid oxidation in vivo. Has little activity on octanoyl-CoA (C8:0), butyryl-CoA (C4:0) …
MCL	10	Cyan	3	ATP5E	9606.ENSP00000243997	ATP synthase subunit epsilon, mitochondrial; Mitochondrial membrane ATP synthase (F(1)F(0) ATP synthase or Complex V) produces ATP from ADP in the presence of a proton gradient across the membrane which is generated by electron transport complexes of the respiratory chain. F-type ATPases consist of two structural domains, F(1) - containing the extramembraneous catalytic core, and F(0) - containin…
MCL	10	Cyan	3	NDUFB9	9606.ENSP00000276689	NADH dehydrogenase [ubiquinone] 1 beta subcomplex subunit 9; Accessory subunit of the mitochondrial membrane respiratory chain NADH dehydrogenase (Complex I), that is believed to be not involved in catalysis. Complex I functions in the transfer of electrons from NADH to the respiratory chain. The immediate electron acceptor for the enzyme is believed to be ubiquinone
MCL	11	Medium Purple	2	AP5Z1	9606.ENSP00000297562	AP-5 complex subunit zeta-1; As part of AP-5, a probable fifth adaptor protein complex it may be involved in endosomal transport. According to it is a putative helicase required for efficient homologous recombination DNA double-strand break repair; Armadillo-like helical domain containing
MCL	11	Medium Purple	2	ZFYVE26	9606.ENSP00000251119	Zinc finger FYVE domain-containing protein 26; Phosphatidylinositol 3-phosphate-binding protein required for the abcission step in cytokinesis: recruited to the midbody during cytokinesis and acts as a regulator of abcission. May also be required for efficient homologous recombination DNA double-strand break repair; Zinc fingers FYVE-type
MCL	12	Medium Purple 2	2	H3F3B	9606.ENSP00000254810	H3 histone, family 3B (H3.3B); Variant histone H3 which replaces conventional H3 in a wide range of nucleosomes in active genes. Constitutes the predominant form of histone H3 in non-dividing cells and is incorporated into chromatin independently of DNA synthesis. Deposited at sites of nucleosomal displacement throughout transcribed genes, suggesting that it represents an epigenetic imprint of tr…
MCL	12	Medium Purple 2	2	KDM2B	9606.ENSP00000366271	F-box and leucine-rich repeat protein 10/11; Lysine-specific demethylase 2B; Histone demethylase that demethylates 'Lys-4' and 'Lys- 36' of histone H3, thereby playing a central role in histone code. Preferentially demethylates trimethylated H3 'Lys-4' and dimethylated H3 'Lys-36' residue while it has weak or no activity for mono- and tri-methylated H3 'Lys-36'. Preferentially binds the transcrib…
MCL	13	Orchid	2	ALG1	9606.ENSP00000262374	Chitobiosyldiphosphodolichol beta-mannosyltransferase; Participates in the formation of the lipid-linked precursor oligosaccharide for N-glycosylation. Involved in assembling the dolichol-pyrophosphate-GlcNAc(2)-Man(5) intermediate on the cytoplasmic surface of the ER; Belongs to the glycosyltransferase group 1 family. Glycosyltransferase 33 subfamily
MCL	13	Orchid	2	SRD5A3	9606.ENSP00000264228	3-oxo-5-alpha-steroid 4-dehydrogenase 3 / polyprenol reductase; Polyprenol reductase; Plays a key role in early steps of protein N-linked glycosylation by being required for the conversion of polyprenol into dolichol. Dolichols are required for the synthesis of dolichol-linked monosaccharides and the oligosaccharide precursor used for N-glycosylation. Acts as a polyprenol reductase that promotes …
MCL	14	Purple	2	CLPB	9606.ENSP00000294053	Caseinolytic peptidase B protein homolog; May function as a regulatory ATPase and be related to secretion/protein trafficking process; AAA ATPases
MCL	14	Purple	2	SIL1	9606.ENSP00000378294	Nucleotide exchange factor SIL1; Required for protein translocation and folding in the endoplasmic reticulum (ER). Functions as a nucleotide exchange factor for the ER lumenal chaperone HSPA5; Belongs to the SIL1 family
MCL	15	Hot Pink	2	CEP63	9606.ENSP00000336524	Centrosomal protein of 63 kDa; Required for normal spindle assembly. Plays a key role in mother-centriole-dependent centriole duplication; the function seems also to involve CEP152, CDK5RAP2 and WDR62 through a stepwise assembled complex at the centrosome that recruits CDK2 required for centriole duplication. Reported to be required for centrosomal recruitment of CEP152; however, this function ha…
MCL	15	Hot Pink	2	KIAA0753	9606.ENSP00000355250	Protein moonraker; Involved in centriole duplication. Positively regulates CEP63 centrosomal localization. Required for WDR62 centrosomal localization and promotes the centrosomal localization of CDK2
MCL	16	Pink	2	KRT81	9606.ENSP00000369349	Keratin, type II cuticular Hb1; Keratins, type II
MCL	16	Pink	2	KRT86	9606.ENSP00000444533	Keratin, type II cuticular Hb6; Keratins, type II

## Sheet: Enrichment subnetwork1 cluster1
#category	term ID	term description	observed gene count	background gene count	strength	false discovery rate	matching proteins in your network (labels)
GO Biological Process
GO Process	GO:0007154	Cell communication	15	5320	0.46	0.0273	TSC2,UBE3A,SLC6A1,GABRB3,STAC3,ARID1B,KCNQ2,CDC42BPB,CACNA1B,DNM1,COL4A3BP,GPSM2,SCN4A,SYNGAP1,SPTBN2
GO Process	GO:0007268	Chemical synaptic transmission	6	418	1.17	0.0273	SLC6A1,GABRB3,STAC3,ARID1B,KCNQ2,CACNA1B
GO Process	GO:0023052	Signaling	15	5239	0.47	0.0273	TSC2,UBE3A,SLC6A1,GABRB3,STAC3,ARID1B,KCNQ2,CDC42BPB,CACNA1B,DNM1,COL4A3BP,GPSM2,SCN4A,SYNGAP1,SPTBN2
GO Cellular Component
GO Component	GO:0045202	Synapse	12	1351	0.96	6.67e-07	EEF1A2,TSC2,SLC6A1,GABRB3,STAC3,ARID1B,KCNQ2,CACNA1B,DNM1,IQSEC2,SYNGAP1,SPTBN2
GO Component	GO:0030054	Cell junction	13	2075	0.81	2.75e-06	EEF1A2,TSC2,SLC6A1,GABRB3,STAC3,ARID1B,KCNQ2,CDC42BPB,CACNA1B,DNM1,IQSEC2,SYNGAP1,SPTBN2
GO Component	GO:0034702	Ion channel complex	5	289	1.25	0.0041	GABRB3,STAC3,KCNQ2,CACNA1B,SCN4A
GO Component	GO:0098794	Postsynapse	6	643	0.98	0.0069	TSC2,SLC6A1,GABRB3,DNM1,SYNGAP1,SPTBN2
GO Component	GO:0034703	Cation channel complex	4	214	1.28	0.0123	STAC3,KCNQ2,CACNA1B,SCN4A
GO Component	GO:0032991	Protein-containing complex	13	5073	0.42	0.0245	EEF1A2,TSC2,UBE3A,GABRB3,STAC3,ARID1B,KCNQ2,CACNA1B,DNM1,COL11A2,GPSM2,SCN4A,SPTBN2
GO Component	GO:0036477	Somatodendritic compartment	6	852	0.86	0.0245	EEF1A2,SLC6A1,CACNA1B,DNM1,SYNGAP1,SPTBN2
GO Component	GO:0043005	Neuron projection	7	1366	0.72	0.0331	SLC6A1,GABRB3,KCNQ2,CACNA1B,DNM1,SCN4A,SYNGAP1
Reactome
Reactome	HSA-373760	L1CAM interactions	4	119	1.54	0.0099	KCNQ2,DNM1,SCN4A,SPTBN2
Reactome	HSA-445095	Interaction between L1 and Ankyrins	3	31	2.0	0.0099	KCNQ2,SCN4A,SPTBN2

[truncated: 2 more sheets: Enrichment subnetwork2 cluster1, Enrichment subnetwork3 cluster1]
