# Supplementary material for: Developing a cluster-based approach for deciphering complexity in individuals with neurodevelopmental differences
Source: Front Pediatr. 2023 Sep 18;11:1171920. doi: 10.3389/fped.2023.1171920 (PMC10543689; doi:10.3389/fped.2023.1171920)
Supplement: Supplementary file 7 [file Table7.xlsx]

## Sheet: MCL clusters dsld kmeans
#clustering method	cluster number	cluster color	gene count	protein name	protein description
MCL	1	Red	52	ACTA1	Actin, alpha skeletal muscle; Actins are highly conserved proteins that are involved in various types of cell motility and are ubiquitously expressed in all eukaryotic cells
MCL	1	Red	52	ACTB	Actin, cytoplasmic 1; Actins are highly conserved proteins that are involved in various types of cell motility and are ubiquitously expressed in all eukaryotic cells
MCL	1	Red	52	ACTG1	Actin, cytoplasmic 2; Actins are highly conserved proteins that are involved in various types of cell motility and are ubiquitously expressed in all eukaryotic cells; Belongs to the actin family
MCL	1	Red	52	BCKDK	[3-methyl-2-oxobutanoate dehydrogenase [lipoamide]] kinase, mitochondrial; Catalyzes the phosphorylation and inactivation of the branched-chain alpha-ketoacid dehydrogenase complex, the key regulatory enzyme of the valine, leucine and isoleucine catabolic pathways. Key enzyme that regulate the activity state of the BCKD complex
MCL	1	Red	52	CDK8	Cyclin-dependent kinase 8; Component of the Mediator complex, a coactivator involved in regulated gene transcription of nearly all RNA polymerase II-dependent genes. Mediator functions as a bridge to convey information from gene-specific regulatory proteins to the basal RNA polymerase II transcription machinery. Mediator is recruited to promoters by direct interactions with regulatory proteins an…
MCL	1	Red	52	CLCN4	H(+)/Cl(-) exchange transporter 4; Proton-coupled chloride transporter. Functions as antiport system and exchanges chloride ions against protons; Belongs to the chloride channel (TC 2.A.49) family. ClC-4/CLCN4 subfamily
MCL	1	Red	52	COL18A1	Collagen alpha-1(XVIII) chain; Probably plays a major role in determining the retinal structure as well as in the closure of the neural tube; Belongs to the multiplexin collagen family
MCL	1	Red	52	DCX	Neuronal migration protein doublecortin; Microtubule-associated protein required for initial steps of neuronal dispersion and cortex lamination during cerebral cortex development. May act by competing with the putative neuronal protein kinase DCLK1 in binding to a target protein. May in that way participate in a signaling pathway that is crucial for neuronal interaction before and during migratio…
MCL	1	Red	52	DPF2	Zinc finger protein ubi-d4; May be a transcription factor required for the apoptosis response following survival factor withdrawal from myeloid cells. Might also have a role in the development and maturation of lymphoid cells; BAF complex
MCL	1	Red	52	ECE1	Endothelin-converting enzyme 1; Converts big endothelin-1 to endothelin-1; Belongs to the peptidase M13 family
MCL	1	Red	52	FBXO11	F-box only protein 11; Substrate recognition component of a SCF (SKP1-CUL1-F- box protein) E3 ubiquitin-protein ligase complex which mediates the ubiquitination and subsequent proteasomal degradation of target proteins, such as DTL/CDT2, BCL6 and PRDM1/BLIMP1. The SCF(FBXO11) complex mediates ubiquitination and degradation of BCL6, thereby playing a role in the germinal center B-cells terminal di…
MCL	1	Red	52	FGF13	Fibroblast growth factor 13; Microtubule-binding protein which directly binds tubulin and is involved in both polymerization and stabilization of microtubules. Through its action on microtubules, may participate to the refinement of axons by negatively regulating axonal and leading processes branching. Plays a crucial role in neuron polarization and migration in the cerebral cortex and the hippoc…
MCL	1	Red	52	FLNA	Filamin-A; Promotes orthogonal branching of actin filaments and links actin filaments to membrane glycoproteins. Anchors various transmembrane proteins to the actin cytoskeleton and serves as a scaffold for a wide range of cytoplasmic signaling proteins. Interaction with FLNA may allow neuroblast migration from the ventricular zone into the cortical plate. Tethers cell surface- localized furin, m…
MCL	1	Red	52	GATAD2B	Transcriptional repressor p66-beta; Transcriptional repressor. Enhances MBD2-mediated repression. Efficient repression requires the presence of GATAD2A. Targets MBD3 to discrete loci in the nucleus. May play a role in synapse development; GATA zinc finger domain containing
MCL	1	Red	52	GSS	Glutathione synthetase; Belongs to the eukaryotic GSH synthase family
MCL	1	Red	52	GUSB	Beta-glucuronidase; Plays an important role in the degradation of dermatan and keratan sulfates; Belongs to the glycosyl hydrolase 2 family
MCL	1	Red	52	H3F3B	H3 histone, family 3B (H3.3B); Variant histone H3 which replaces conventional H3 in a wide range of nucleosomes in active genes. Constitutes the predominant form of histone H3 in non-dividing cells and is incorporated into chromatin independently of DNA synthesis. Deposited at sites of nucleosomal displacement throughout transcribed genes, suggesting that it represents an epigenetic imprint of tr…
MCL	1	Red	52	HDAC8	Histone deacetylase 8; Responsible for the deacetylation of lysine residues on the N-terminal part of the core histones (H2A, H2B, H3 and H4). Histone deacetylation gives a tag for epigenetic repression and plays an important role in transcriptional regulation, cell cycle progression and developmental events. Histone deacetylases act via the formation of large multiprotein complexes. Also involve…
MCL	1	Red	52	HIST1H1E	Histone cluster 1 h1 family member e; Histone H1.4; Histone H1 protein binds to linker DNA between nucleosomes forming the macromolecular structure known as the chromatin fiber. Histones H1 are necessary for the condensation of nucleosome chains into higher-order structured fibers. Acts also as a regulator of individual gene transcription through chromatin remodeling, nucleosome spacing and DNA m…
MCL	1	Red	52	KAT8	Histone acetyltransferase myst1; Histone acetyltransferase KAT8; Histone acetyltransferase which may be involved in transcriptional activation. May influence the function of ATM. As part of the MSL complex it is involved in acetylation of nucleosomal histone H4 producing specifically H4K16ac. As part of the NSL complex it may be involved in acetylation of nucleosomal histone H4 on several lysine …
MCL	1	Red	52	KDM5C	Lysine-specific demethylase 5C; Histone demethylase that specifically demethylates 'Lys- 4' of histone H3, thereby playing a central role in histone code. Does not demethylate histone H3 'Lys-9', H3 'Lys-27', H3 'Lys-36', H3 'Lys-79' or H4 'Lys-20'. Demethylates trimethylated and dimethylated but not monomethylated H3 'Lys-4'. Participates in transcriptional repression of neuronal genes by recrui…
MCL	1	Red	52	KDM6B	Lysine-specific demethylase 6B; Histone demethylase that specifically demethylates 'Lys- 27' of histone H3, thereby playing a central role in histone code. Demethylates trimethylated and dimethylated H3 'Lys-27'. Plays a central role in regulation of posterior development, by regulating HOX gene expression. Involved in inflammatory response by participating in macrophage differentiation in case o…
MCL	1	Red	52	KYNU	Kynureninase; Catalyzes the cleavage of L-kynurenine (L-Kyn) and L-3- hydroxykynurenine (L-3OHKyn) into anthranilic acid (AA) and 3- hydroxyanthranilic acid (3-OHAA), respectively. Has a preference for the L-3-hydroxy form. Also has cysteine-conjugate-beta-lyase activity
MCL	1	Red	52	LAMC3	Laminin subunit gamma-3; Binding to cells via a high affinity receptor, laminin is thought to mediate the attachment, migration and organization of cells into tissues during embryonic development by interacting with other extracellular matrix components
MCL	1	Red	52	MC2R	Adrenocorticotropic hormone receptor; Receptor for corticotropin (ACTH). This receptor is mediated by G proteins (G(s)) which activate adenylate cyclase (cAMP); Belongs to the G-protein coupled receptor 1 family
MCL	1	Red	52	MEIS2	Homeobox protein Meis2; Involved in transcriptional regulation. Binds to HOX or PBX proteins to form dimers, or to a DNA-bound dimer of PBX and HOX proteins and thought to have a role in stabilization of the homeoprotein-DNA complex. Isoform 3 is required for the activity of a PDX1:PBX1b:MEIS2b complex in pancreatic acinar cells involved in the transcriptional activation of the ELA1 enhancer; the…
MCL	1	Red	52	MTOR	Serine/threonine-protein kinase mTOR; Serine/threonine protein kinase which is a central regulator of cellular metabolism, growth and survival in response to hormones, growth factors, nutrients, energy and stress signals. MTOR directly or indirectly regulates the phosphorylation of at least 800 proteins. Functions as part of 2 structurally and functionally distinct signaling complexes mTORC1 and …
MCL	1	Red	52	NCOR1	Nuclear receptor co-repressor 1; Nuclear receptor corepressor 1; Mediates transcriptional repression by certain nuclear receptors. Part of a complex which promotes histone deacetylation and the formation of repressive chromatin structures which may impede the access of basal transcription factors. Participates in the transcriptional repressor activity produced by BCL6
MCL	1	Red	52	NOTCH1	Neurogenic locus notch homolog protein 1; Functions as a receptor for membrane-bound ligands Jagged1, Jagged2 and Delta1 to regulate cell-fate determination. Upon ligand activation through the released notch intracellular domain (NICD) it forms a transcriptional activator complex with RBPJ/RBPSUH and activates genes of the enhancer of split locus. Affects the implementation of differentiation, pr…
MCL	1	Red	52	NR2F1	COUP transcription factor 1; Coup (chicken ovalbumin upstream promoter) transcription factor binds to the ovalbumin promoter and, in conjunction with another protein (S300-II) stimulates initiation of transcription. Binds to both direct repeats and palindromes of the 5'-AGGTCA-3' motif. Represses transcriptional activity of LHCG; Nuclear hormone receptors
MCL	1	Red	52	POU1F1	Pituitary-specific positive transcription factor 1; Transcription factor involved in the specification of the lactotrope, somatotrope, and thyrotrope phenotypes in the developing anterior pituitary. Specifically binds to the consensus sequence 5'-TAAAT-3'. Activates growth hormone and prolactin genes; Belongs to the POU transcription factor family. Class- 1 subfamily
MCL	1	Red	52	PPM1D	Protein phosphatase, mg2+/mn2+ dependent 1d; Protein phosphatase 1D; Required for the relief of p53-dependent checkpoint mediated cell cycle arrest. Binds to and dephosphorylates 'Ser-15' of TP53 and 'Ser-345' of CHEK1 which contributes to the functional inactivation of these proteins. Mediates MAPK14 dephosphorylation and inactivation
MCL	1	Red	52	PSEN2	Presenilin-2; Probable catalytic subunit of the gamma-secretase complex, an endoprotease complex that catalyzes the intramembrane cleavage of integral membrane proteins such as Notch receptors and APP (amyloid-beta precursor protein). Requires the other members of the gamma-secretase complex to have a protease activity. May play a role in intracellular signaling and gene expression or in linking …
MCL	1	Red	52	RAC1	Ras-related C3 botulinum toxin substrate 1; Plasma membrane-associated small GTPase which cycles between active GTP-bound and inactive GDP-bound states. In its active state, binds to a variety of effector proteins to regulate cellular responses such as secretory processes, phagocytosis of apoptotic cells, epithelial cell polarization and growth-factor induced formation of membrane ruffles. Rac1 p…
MCL	1	Red	52	SETBP1	SET binding protein 1
MCL	1	Red	52	SETD1A	Histone-lysine N-methyltransferase SETD1A; Histone methyltransferase that specifically methylates 'Lys-4' of histone H3, when part of the SET1 histone methyltransferase (HMT) complex, but not if the neighboring 'Lys- 9' residue is already methylated. H3 'Lys-4' methylation represents a specific tag for epigenetic transcriptional activation. The non-overlapping localization with SETD1B suggests th…
MCL	1	Red	52	SMARCA2	Swi/snf related, matrix associated, actin dependent regulator of chromatin, subfamily a, member 2; Probable global transcription activator SNF2L2; Involved in transcriptional activation and repression of select genes by chromatin remodeling (alteration of DNA-nucleosome topology). Component of SWI/SNF chromatin remodeling complexes that carry out key enzymatic activities, changing chromatin struc…
MCL	1	Red	52	SMARCC2	Swi/snf related, matrix associated, actin dependent regulator of chromatin subfamily c member 2; SWI/SNF complex subunit SMARCC2; Involved in transcriptional activation and repression of select genes by chromatin remodeling (alteration of DNA-nucleosome topology). Component of SWI/SNF chromatin remodeling complexes that carry out key enzymatic activities, changing chromatin structure by altering …
MCL	1	Red	52	SOX2	Transcription factor SOX-2; Transcription factor that forms a trimeric complex with OCT4 on DNA and controls the expression of a number of genes involved in embryonic development such as YES1, FGF4, UTF1 and ZFP206 (By similarity). Critical for early embryogenesis and for embryonic stem cell pluripotency. May function as a switch in neuronal development. Downstream SRRT target that mediates the p…
MCL	1	Red	52	SOX5	Transcription factor SOX-5; Binds specifically to the DNA sequence 5'-AACAAT-3'. Activates transcription of COL2A1 and AGC1 in vitro; SRY-boxes
MCL	1	Red	52	SRCAP	Helicase SRCAP; Catalytic component of the SRCAP complex which mediates the ATP-dependent exchange of histone H2AZ/H2B dimers for nucleosomal H2A/H2B, leading to transcriptional regulation of selected genes by chromatin remodeling. Acts as a coactivator for CREB-mediated transcription, steroid receptor-mediated transcription, and Notch-mediated transcription; Belongs to the SNF2/RAD54 helicase fa…
MCL	1	Red	52	SUV420H1	[histone h4]-n-methyl-l-lysine20 n-methyltransferase; Histone-lysine N-methyltransferase KMT5B; Histone methyltransferase that specifically trimethylates 'Lys-20' of histone H4. H4 'Lys-20' trimethylation represents a specific tag for epigenetic transcriptional repression. Mainly functions in pericentric heterochromatin regions, thereby playing a central role in the establishment of constitutive …
MCL	1	Red	52	TBR1	T-box brain protein 1; Probable transcriptional regulator involved in developmental processes. Required for normal brain development; T-boxes
MCL	1	Red	52	TDP2	Tyrosyl-DNA phosphodiesterase 2; DNA repair enzyme that can remove a variety of covalent adducts from DNA through hydrolysis of a 5'-phosphodiester bond, giving rise to DNA with a free 5' phosphate. Catalyzes the hydrolysis of dead-end complexes between DNA and the topoisomerase 2 (TOP2) active site tyrosine residue. The 5'-tyrosyl DNA phosphodiesterase activity can enable the repair of TOP2-indu…
MCL	1	Red	52	TET3	Methylcytosine dioxygenase TET3; Dioxygenase that catalyzes the conversion of the modified genomic base 5-methylcytosine (5mC) into 5- hydroxymethylcytosine (5hmC) and plays a key role in epigenetic chromatin reprogramming in the zygote following fertilization. Also mediates subsequent conversion of 5hmC into 5-formylcytosine (5fC), and conversion of 5fC to 5-carboxylcytosine (5caC). Conversion o…
MCL	1	Red	52	TGFBR2	Transforming growth factor beta receptor 2; TGF-beta receptor type-2; Transmembrane serine/threonine kinase forming with the TGF-beta type I serine/threonine kinase receptor, TGFBR1, the non- promiscuous receptor for the TGF-beta cytokines TGFB1, TGFB2 and TGFB3. Transduces the TGFB1, TGFB2 and TGFB3 signal from the cell surface to the cytoplasm and is thus regulating a plethora of physiological …
MCL	1	Red	52	TRIP12	Thyroid hormone receptor interactor 12; E3 ubiquitin-protein ligase TRIP12; E3 ubiquitin-protein ligase involved in ubiquitin fusion degradation (UFD) pathway and regulation of DNA repair. Part of the ubiquitin fusion degradation (UFD) pathway, a process that mediates ubiquitination of protein at their N-terminus, regardeless of the presence of lysine residues in target proteins. In normal cells,…
MCL	1	Red	52	TUB	Tubby bipartite transcription factor; Tubby protein homolog; Functions in signal transduction from heterotrimeric G protein-coupled receptors. Binds to membranes containing phosphatidylinositol 4,5-bisphosphate. Can bind DNA (in vitro). May contribute to the regulation of transcription in the nucleus. Could be involved in the hypothalamic regulation of body weight (By similarity). Contribute to s…
MCL	1	Red	52	TXNRD2	Thioredoxin reductase 2, mitochondrial; Maintains thioredoxin in a reduced state. Implicated in the defenses against oxidative stress. May play a role in redox- regulated cell signaling; Belongs to the class-I pyridine nucleotide-disulfide oxidoreductase family
MCL	1	Red	52	WT1	Wilms tumor protein; Transcription factor that plays an important role in cellular development and cell survival. Recognizes and binds to the DNA sequence 5'-GCG(T/G)GGGCG-3'. Regulates the expression of numerous target genes, including EPO. Plays an essential role for development of the urogenital system. It has a tumor suppressor as well as an oncogenic role in tumor formation. Function may be …
MCL	1	Red	52	YWHAG	14-3-3 protein gamma; Adapter protein implicated in the regulation of a large spectrum of both general and specialized signaling pathways. Binds to a large number of partners, usually by recognition of a phosphoserine or phosphothreonine motif. Binding generally results in the modulation of the activity of the binding partner; Belongs to the 14-3-3 family
MCL	1	Red	52	ZMYND11	Zinc finger MYND domain-containing protein 11; Chromatin reader that specifically recognizes and binds histone H3.3 trimethylated at 'Lys-36' (H3.3K36me3) and regulates RNA polymerase II elongation. Does not bind other histone H3 subtypes (H3.1 or H3.2) (By similarity). Colocalizes with highly expressed genes and functions as a transcription corepressor by modulating RNA polymerase II at the elon…
MCL	2	Salmon	16	CACNA1D	Voltage-dependent L-type calcium channel subunit alpha-1D; Voltage-sensitive calcium channels (VSCC) mediate the entry of calcium ions into excitable cells and are also involved in a variety of calcium-dependent processes, including muscle contraction, hormone or neurotransmitter release, gene expression, cell motility, cell division and cell death. The isoform alpha-1D gives rise to L-type calci…
MCL	2	Salmon	16	CEP135	Centrosomal protein of 135 kDa; Centrosomal protein involved in centriole biogenesis. Acts as a scaffolding protein during early centriole biogenesis. Required for the targeting of centriole satellite proteins to centrosomes such as of PCM1, SSX2IP and CEP290 and recruitment of WRAP73 to centrioles. Also required for centriole-centriole cohesion during interphase by acting as a platform protein f…
MCL	2	Salmon	16	CEP63	Centrosomal protein of 63 kDa; Required for normal spindle assembly. Plays a key role in mother-centriole-dependent centriole duplication; the function seems also to involve CEP152, CDK5RAP2 and WDR62 through a stepwise assembled complex at the centrosome that recruits CDK2 required for centriole duplication. Reported to be required for centrosomal recruitment of CEP152; however, this function ha…
MCL	2	Salmon	16	CLRN1	Clarin-1; May have a role in the excitatory ribbon synapse junctions between hair cells and cochlear ganglion cells and presumably also in analogous synapses within the retina; Belongs to the clarin family
MCL	2	Salmon	16	FAM161A	Family with sequence similarity 161 member a; Protein FAM161A; Involved in ciliogenesis
MCL	2	Salmon	16	FSCN2	Fascin-2; Acts as an actin bundling protein. May play a pivotal role in photoreceptor cell-specific events, such as disk morphogenesis; Fascins
MCL	2	Salmon	16	GNB1	Guanine nucleotide-binding protein G(I)/G(S)/G(T) subunit beta-1; Guanine nucleotide-binding proteins (G proteins) are involved as a modulator or transducer in various transmembrane signaling systems. The beta and gamma chains are required for the GTPase activity, for replacement of GDP by GTP, and for G protein- effector interaction
MCL	2	Salmon	16	GNB5	Guanine nucleotide-binding protein subunit beta-5; Enhances GTPase-activating protein (GAP) activity of regulator of G protein signaling (RGS) proteins, hence involved in the termination of the signaling initiated by the G protein coupled receptors (GPCRs) by accelerating the GTP hydrolysis on the G-alpha subunits, thereby promoting their inactivation (Probable). Increases RGS9 GTPase-activating …
MCL	2	Salmon	16	LCA5	LCA5, lebercilin; Lebercilin; Might be involved in minus end-directed microtubule transport
MCL	2	Salmon	16	NRL	Neural retina-specific leucine zipper protein; Acts as a transcriptional activator which regulates the expression of several rod-specific genes, including RHO and PDE6B. Functions also as a transcriptional coactivator, stimulating transcription mediated by the transcription factor CRX and NR2E3. Binds in a sequence-specific manner to the rhodopsin promoter; Basic leucine zipper proteins
MCL	2	Salmon	16	PCNT	Pericentrin; Integral component of the filamentous matrix of the centrosome involved in the initial establishment of organized microtubule arrays in both mitosis and meiosis. Plays a role, together with DISC1, in the microtubule network formation. Is an integral component of the pericentriolar material (PCM). May play an important role in preventing premature centrosome splitting during interphas…
MCL	2	Salmon	16	PDE6A	Rod cGMP-specific 3',5'-cyclic phosphodiesterase subunit alpha; This protein participates in processes of transmission and amplification of the visual signal; Belongs to the cyclic nucleotide phosphodiesterase family
MCL	2	Salmon	16	POC1A	POC1 centriolar protein homolog A; Plays an important role in centriole assembly and/or stability and ciliogenesis. Involved in early steps of centriole duplication, as well as in the later steps of centriole length control. Acts in concert with POC1B to ensure centriole integrity and proper mitotic spindle formation; Belongs to the WD repeat POC1 family
MCL	2	Salmon	16	RBP3	Retinol-binding protein 3; IRBP shuttles 11-cis and all trans retinoids between the retinol isomerase in the pigment epithelium and the visual pigments in the photoreceptor cells of the retina
MCL	2	Salmon	16	RORB	Rar-related orphan receptor beta; Nuclear receptor ROR-beta; Nuclear receptor that binds DNA as a monomer to ROR response elements (RORE) containing a single core motif half-site 5'-AGGTCA-3' preceded by a short A-T-rich sequence. Considered to have intrinsic transcriptional activity, have some natural ligands such as all-trans retinoic acid (ATRA) and other retinoids which act as inverse agonist…
MCL	2	Salmon	16	TUBGCP2	Tubulin gamma complex associated protein 2; Gamma-tubulin complex component 2; Gamma-tubulin complex is necessary for microtubule nucleation at the centrosome
MCL	3	Saddle Brown	11	AP2S1	Adaptor related protein complex 2 sigma 1 subunit; AP-2 complex subunit sigma; Component of the adaptor protein complex 2 (AP-2). Adaptor protein complexes function in protein Transport via Transport vesicles in different membrane traffic pathways. Adaptor protein complexes are vesicle coat components and appear to be involved in cargo selection and vesicle formation. AP-2 is involved in clathrin…
MCL	3	Saddle Brown	11	CDKL5	Cyclin-dependent kinase-like 5; Mediates phosphorylation of MECP2; Cilia and flagella associated
MCL	3	Saddle Brown	11	DYM	Dymeclin; Necessary for correct organization of Golgi apparatus. Involved in bone development; Belongs to the dymeclin family
MCL	3	Saddle Brown	11	GRIA1	Glutamate ionotropic receptor ampa type subunit 1; Glutamate receptor 1; Ionotropic glutamate receptor. L-glutamate acts as an excitatory neurotransmitter at many synapses in the central nervous system. Binding of the excitatory neurotransmitter L- glutamate induces a conformation change, leading to the opening of the cation channel, and thereby converts the chemical signal to an electrical impul…
MCL	3	Saddle Brown	11	GRIN2D	Glutamate receptor ionotropic, NMDA 2D; Component of NMDA receptor complexes that function as heterotetrameric, ligand-gated ion channels with high calcium permeability and voltage-dependent sensitivity to magnesium. Channel activation requires binding of the neurotransmitter glutamate to the epsilon subunit, glycine binding to the zeta subunit, plus membrane depolarization to eliminate channel i…
MCL	3	Saddle Brown	11	HES7	Transcription factor HES-7; Transcriptional repressor. Represses transcription from both N box- and E box-containing promoters. May with HES1, cooperatively regulate somite formation in the presomitic mesoderm (PSM). May function as a segmentation clock, which is essential for coordinated somite segmentation (By similarity); Basic helix-loop-helix proteins
MCL	3	Saddle Brown	11	NRXN1	Neurexin-1; Cell surface protein involved in cell-cell-interactions, exocytosis of secretory granules and regulation of signal transmission. Function is isoform-specific. Alpha-type isoforms have a long N-terminus with six laminin G-like domains and play an important role in synaptic signal transmission. Alpha-type isoforms play a role in the regulation of calcium channel activity and Ca(2+)-trig…
MCL	3	Saddle Brown	11	NRXN3	Neurexin-3; Neuronal cell surface protein that may be involved in cell recognition and cell adhesion. May mediate intracellular signaling; Neurexins
MCL	3	Saddle Brown	11	SHANK2	SH3 and multiple ankyrin repeat domains protein 2; Seems to be an adapter protein in the postsynaptic density (PSD) of excitatory synapses that interconnects receptors of the postsynaptic membrane including NMDA-type and metabotropic glutamate receptors, and the actin-based cytoskeleton. May play a role in the structural and functional organization of the dendritic spine and synaptic junction; Be…
MCL	3	Saddle Brown	11	TRAPPC2	Trafficking protein particle complex subunit 2; Prevents transcriptional repression and induction of cell death by ENO1 (By similarity). May play a role in vesicular transport from endoplasmic reticulum to Golgi; Belongs to the TRAPP small subunits family. Sedlin subfamily
MCL	3	Saddle Brown	11	WDR45	WD repeat domain phosphoinositide-interacting protein 4; Plays an important role in the autophagy pathway, which is the major intracellular degradation system by which cytoplasmic materials are packaged into autophagosomes and delivered to lysosomes for degradation; Belongs to the WD repeat SVP1 family
MCL	4	Sandy Brown	8	ALG12	Dol-P-Man:Man(7)GlcNAc(2)-PP-Dol alpha-1,6-mannosyltransferase; Adds the eighth mannose residue in an alpha-1,6 linkage onto the dolichol-PP-oligosaccharide precursor (dolichol-PP- Man(7)GlcNAc(2)) required for protein glycosylation; Belongs to the glycosyltransferase 22 family
MCL	4	Sandy Brown	8	ATP1A1	Sodium/potassium-transporting ATPase subunit alpha-1; This is the catalytic component of the active enzyme, which catalyzes the hydrolysis of ATP coupled with the exchange of sodium and potassium ions across the plasma membrane. This action creates the electrochemical gradient of sodium and potassium ions, providing the energy for active transport of various nutrients; ATPase Na+/K+ transporting …
MCL	4	Sandy Brown	8	COL4A3BP	Collagen type IV alpha-3-binding protein; Shelters ceramides and diacylglycerol lipids inside its START domain and mediates the intracellular trafficking of ceramides and diacylglycerol lipids in a non-vesicular manner; Pleckstrin homology domain containing
MCL	4	Sandy Brown	8	DDOST	Dolichyl-diphosphooligosaccharide--protein glycosyltransferase 48 kDa subunit; Essential subunit of the N-oligosaccharyl transferase (OST) complex which catalyzes the transfer of a high mannose oligosaccharide from a lipid-linked oligosaccharide donor to an asparagine residue within an Asn-X-Ser/Thr consensus motif in nascent polypeptide chains. Required for the assembly of both SST3A- and SS3B-c…
MCL	4	Sandy Brown	8	HADHB	hydroxyacyl-CoA dehydrogenase trifunctional multienzyme complex subunit beta
MCL	4	Sandy Brown	8	IVD	Isovaleryl-CoA dehydrogenase, mitochondrial; Acyl-CoA dehydrogenase family
MCL	4	Sandy Brown	8	PSAP	Prosaposin; Saposins are specific low-molecular mass non-enzymic proteins, they participate in the lysosomal degradation of sphingolipids, which takes place by the sequential action of specific hydrolases; Endogenous ligands
MCL	4	Sandy Brown	8	TUSC3	Oligosaccharyltransferase complex subunit gamma; Tumor suppressor candidate 3; Acts as accessory component of the N-oligosaccharyl transferase (OST) complex which catalyzes the transfer of a high mannose oligosaccharide from a lipid-linked oligosaccharide donor to an asparagine residue within an Asn-X-Ser/Thr consensus motif in nascent polypeptide chains. Involved in N-glycosylation of STT3B-depe…
MCL	5	Brown	6	ADA	Adenosine deaminase; Catalyzes the hydrolytic deamination of adenosine and 2- deoxyadenosine. Plays an important role in purine metabolism and in adenosine homeostasis. Modulates signaling by extracellular adenosine, and so contributes indirectly to cellular signaling events. Acts as a positive regulator of T-cell coactivation, by binding DPP4. Its interaction with DPP4 regulates lymphocyte- epit…
MCL	5	Brown	6	AHCY	Adenosylhomocysteinase; Adenosylhomocysteine is a competitive inhibitor of S- adenosyl-L-methionine-dependent methyl transferase reactions; therefore adenosylhomocysteinase may play a key role in the control of methylations via regulation of the intracellular concentration of adenosylhomocysteine
MCL	5	Brown	6	CANT1	Soluble calcium-activated nucleotidase 1; Calcium-dependent nucleotidase with a preference for UDP. The order of activity with different substrates is UDP > GDP > UTP > GTP. Has very low activity towards ADP and even lower activity towards ATP. Does not hydrolyze AMP and GMP. Involved in proteoglycan synthesis
MCL	5	Brown	6	NT5C2	Cytosolic purine 5'-nucleotidase; May have a critical role in the maintenance of a constant composition of intracellular purine/pyrimidine nucleotides in cooperation with other nucleotidases. Preferentially hydrolyzes inosine 5'-monophosphate (IMP) and other purine nucleotides; 5'-nucleotidases
MCL	5	Brown	6	SMS	Spermine synthase; Catalyzes the production of spermine from spermidine and decarboxylated S-adenosylmethionine (dcSAM)
MCL	5	Brown	6	UMPS	Uridine 5'-monophosphate synthase; Uridine monophosphate synthetase; In the C-terminal section; belongs to the OMP decarboxylase family
MCL	6	Yellow	6	AMT	Aminomethyltransferase, mitochondrial; The glycine cleavage system catalyzes the degradation of glycine
MCL	6	Yellow	6	BOLA3	BolA-like protein 3; Acts as a mitochondrial iron-sulfur (Fe-S) cluster assembly factor that facilitates (Fe-S) cluster insertion into a subset of mitochondrial proteins. Probably acts together with NFU1; Belongs to the BolA/IbaG family
MCL	6	Yellow	6	CLN6	Ceroid-lipofuscinosis neuronal protein 6; CLN6, transmembrane ER protein
MCL	6	Yellow	6	IBA57	Iron-sulfur cluster assembly factor iba57; Putative transferase CAF17, mitochondrial; Involved in the maturation of mitochondrial 4Fe-4S proteins functioning late in the iron-sulfur cluster assembly pathway
MCL	6	Yellow	6	MTFMT	Methionyl-tRNA formyltransferase, mitochondrial; Formylates methionyl-tRNA in mitochondria. A single tRNA(Met) gene gives rise to both an initiator and an elongator species via an unknown mechanism (By similarity)
MCL	6	Yellow	6	NFU1	NFU1 iron-sulfur cluster scaffold homolog, mitochondrial; Iron-sulfur cluster scaffold protein which can assemble [4Fe-2S] clusters and deliver them to target proteins; Belongs to the NifU family
MCL	7	Olive	6	DDC	Aromatic-l-amino-acid/l-tryptophan decarboxylase; Aromatic-L-amino-acid decarboxylase; Catalyzes the decarboxylation of L-3,4- dihydroxyphenylalanine (DOPA) to dopamine, L-5-hydroxytryptophan to serotonin and L-tryptophan to tryptamine
MCL	7	Olive	6	GCH1	GTP cyclohydrolase 1; Positively regulates nitric oxide synthesis in umbilical vein endothelial cells (HUVECs). May be involved in dopamine synthesis. May modify pain sensitivity and persistence. Isoform GCH-1 is the functional enzyme, the potential function of the enzymatically inactive isoforms remains unknown; Belongs to the GTP cyclohydrolase I family
MCL	7	Olive	6	GPSM2	G-protein-signaling modulator 2; Plays an important role in mitotic spindle pole organization via its interaction with NUMA1. Required for cortical dynein- dynactin complex recruitment during metaphase. Plays a role in metaphase spindle orientation. Plays also an important role in asymmetric cell divisions. Has guanine nucleotide dissociation inhibitor (GDI) activity towards G(i) alpha proteins, …
MCL	7	Olive	6	HLCS	Holocarboxylase synthetase; Biotin--protein ligase; Post-translational modification of specific protein by attachment of biotin. Acts on various carboxylases such as acetyl- CoA-carboxylase, pyruvate carboxylase, propionyl CoA carboxylase, and 3-methylcrotonyl CoA carboxylase
MCL	7	Olive	6	MMAA	Methylmalonic aciduria type A protein, mitochondrial; GTPase, binds and hydrolyzes GTP. Involved in intracellular vitamin B12 metabolism, mediates the transport of cobalamin (Cbl) into mitochondria for the final steps of adenosylcobalamin (AdoCbl) synthesis. Functions as a G-protein chaperone that assists AdoCbl cofactor delivery from MMAB to the methylmalonyl-CoA mutase (MUT) and reactivation of…
MCL	7	Olive	6	SPR	Sepiapterin reductase; Catalyzes the final one or two reductions in tetra- hydrobiopterin biosynthesis to form 5,6,7,8-tetrahydrobiopterin; Belongs to the sepiapterin reductase family
MCL	8	Green Yellow	6	COX20	Cytochrome c oxidase protein 20 homolog; Mitochondrial respiratory chain complex assembly factors; Belongs to the COX20 family
MCL	8	Green Yellow	6	COX4I2	Cytochrome c oxidase subunit 4 isoform 2, mitochondrial; This protein is one of the nuclear-coded polypeptide chains of cytochrome c oxidase, the terminal oxidase in mitochondrial electron transport
MCL	8	Green Yellow	6	NDUFAF1	Nadh dehydrogenase [ubiquinone] 1 alpha subcomplex assembly factor 1; Complex I intermediate-associated protein 30, mitochondrial; Chaperone protein involved in the assembly of the mitochondrial NADH:ubiquinone oxidoreductase complex (complex I); Belongs to the CIA30 family
MCL	8	Green Yellow	6	NDUFAF3	NADH dehydrogenase [ubiquinone] 1 alpha subcomplex assembly factor 3; Essential factor for the assembly of mitochondrial NADH:ubiquinone oxidoreductase complex (complex I)
MCL	8	Green Yellow	6	SURF1	SURF1, cytochrome c oxidase assembly factor; Surfeit locus protein 1; Component of the MITRAC (mitochondrial translation regulation assembly intermediate of cytochrome c oxidase complex) complex, that regulates cytochrome c oxidase assembly
MCL	8	Green Yellow	6	ZBTB18	Zinc finger and BTB domain-containing protein 18; Transcriptional repressor that plays a role in various developmental processes such as myogenesis and brain development. Plays a key role in myogenesis by directly repressing the expression of ID2 and ID3, 2 inhibitors of skeletal myogenesis. Also involved in controlling cell division of progenitor cells and regulating the survival of postmitotic …
MCL	9	Lime Green	5	CARS2	Probable cysteine--tRNA ligase, mitochondrial; cysteinyl-tRNA synthetase 2, mitochondrial; Belongs to the class-I aminoacyl-tRNA synthetase family
MCL	9	Lime Green	5	RARS	Arginine--tRNA ligase, cytoplasmic; Forms part of a macromolecular complex that catalyzes the attachment of specific amino acids to cognate tRNAs during protein synthesis. Modulates the secretion of AIMP1 and may be involved in generation of the inflammatory cytokine EMAP2 from AIMP1; Aminoacyl tRNA synthetases, Class I
MCL	9	Lime Green	5	SARS2	Serine--tRNA ligase, mitochondrial; Catalyzes the attachment of serine to tRNA(Ser). Is also probably able to aminoacylate tRNA(Sec) with serine, to form the misacylated tRNA L-seryl-tRNA(Sec), which will be further converted into selenocysteinyl-tRNA(Sec); Aminoacyl tRNA synthetases, Class II
MCL	9	Lime Green	5	SEPSECS	Sep (o-phosphoserine) trna:sec (selenocysteine) trna synthase; O-phosphoseryl-tRNA(Sec) selenium transferase; Converts O-phosphoseryl-tRNA(Sec) to selenocysteinyl- tRNA(Sec) required for selenoprotein biosynthesis
MCL	9	Lime Green	5	WDR11	WD repeat-containing protein 11; WD repeat domain containing
MCL	10	Green	5	KCNB1	Potassium voltage-gated channel subfamily B member 1; Voltage-gated potassium channel that mediates transmembrane potassium transport in excitable membranes, primarily in the brain, but also in the pancreas and cardiovascular system. Contributes to the regulation of the action potential (AP) repolarization, duration and frequency of repetitive AP firing in neurons, muscle cells and endocrine cell…
MCL	10	Green	5	KCNC1	Potassium voltage-gated channel subfamily C member 1; Voltage-gated potassium channel that plays an important role in the rapid repolarization of fast-firing brain neurons. The channel opens in response to the voltage difference across the membrane, forming a potassium-selective channel through which potassium ions pass in accordance with their electrochemical gradient. Can form functional homote…
MCL	10	Green	5	KCND3	Potassium voltage-gated channel subfamily D member 3; Pore-forming (alpha) subunit of voltage-gated rapidly inactivating A-type potassium channels. May contribute to I(To) current in heart and I(Sa) current in neurons. Channel properties are modulated by interactions with other alpha subunits and with regulatory subunits; Belongs to the potassium channel family. D (Shal) (TC 1.A.1.2) subfamily. K…
MCL	10	Green	5	KCNT2	Potassium channel subfamily T member 2; Outward rectifying potassium channel. Produces rapidly activating outward rectifier K(+) currents. Activated by high intracellular sodium and chloride levels. Channel activity is inhibited by ATP and by inhalation anesthetics, such as isoflurane (By similarity). Inhibited upon stimulation of G-protein coupled receptors, such as CHRM1 and GRIA1; Belongs to t…
MCL	10	Green	5	RPS19	40S ribosomal protein S19; Required for pre-rRNA processing and maturation of 40S ribosomal subunits; Belongs to the eukaryotic ribosomal protein eS19 family
MCL	11	Sky Blue	5	CUL4B	Cullin-4B; Core component of multiple cullin-RING-based E3 ubiquitin-protein ligase complexes which mediate the ubiquitination and subsequent proteasomal degradation of target proteins. The functional specificity of the E3 ubiquitin-protein ligase complex depends on the variable substrate recognition subunit. CUL4B may act within the complex as a scaffold protein, contributing to catalysis throug…
MCL	11	Sky Blue	5	ERCC5	DNA repair protein complementing XP-G cells; Single-stranded structure-specific DNA endonuclease involved in DNA excision repair. Makes the 3'incision in DNA nucleotide excision repair (NER). Acts as a cofactor for a DNA glycosylase that removes oxidized pyrimidines from DNA. May also be involved in transcription-coupled repair of this kind of damage, in transcription by RNA polymerase II, and pe…
MCL	11	Sky Blue	5	ERCC8	DNA excision repair protein ERCC-8; Substrate-recognition component of the CSA complex, a DCX (DDB1-CUL4-X-box) E3 ubiquitin-protein ligase complex, involved in transcription-coupled nucleotide excision repair. The CSA complex (DCX(ERCC8) complex) promotes the ubiquitination and subsequent proteasomal degradation of ERCC6 in a UV-dependent manner; ERCC6 degradation is essential for the recovery o…
MCL	11	Sky Blue	5	GTF2H5	General transcription factor IIH subunit 5; Component of the TFIIH basal transcription factor involved in nucleotide excision repair (NER) of DNA and, when complexed to CAK, in RNA transcription by RNA polymerase II. Necessary for the stability of the TFIIH complex and for the presence of normal levels of TFIIH in the cell; General transcription factors
MCL	11	Sky Blue	5	SERAC1	Protein SERAC1; Plays an important role in the phosphatidylglycerol remodeling that is essential for both mitochondrial function and intracellular cholesterol trafficking. May catalyze the remodeling of phosphatidylglycerol and be involved in the transacylation- acylation reaction to produce phosphatidylglycerol-36:1. May be involved in bis(monoacylglycerol)phosphate biosynthetic pathway; Armadil…
MCL	12	Sky Blue 2	5	EVC2	Ellis van creveld syndrome protein 2; Limbin; Component of the EvC complex that positively regulates ciliary Hedgehog (Hh) signaling. Plays a critical role in bone formation and skeletal development. May be involved in early embryonic morphogenesis
MCL	12	Sky Blue 2	5	KIF7	Kinesin-like protein KIF7; Essential for hedgehog signaling regulation: acts as both a negative and positive regulator of sonic hedgehog (Shh) and Indian hedgehog (Ihh) pathways, acting downstream of SMO, through both SUFU-dependent and -independent mechanisms. Involved in the regulation of microtubular dynamics. Required for proper organization of the ciliary tip and control of ciliary localizat…
MCL	12	Sky Blue 2	5	NPHP1	Nephrocystin-1; Together with BCAR1 it may play a role in the control of epithelial cell polarity. Involved in the organization of apical junctions in kidney cells together with NPHP4 and RPGRIP1L/NPHP8 (By similarity). Does not seem to be strictly required for ciliogenesis (By similarity). Seems to help to recruit PTK2B/PYK2 to cell matrix adhesions, thereby initiating phosphorylation of PTK2B/P…
MCL	12	Sky Blue 2	5	SUFU	Suppressor of fused homolog; Negative regulator in the hedgehog signaling pathway. Down-regulates GLI1-mediated transactivation of target genes. Down- regulates GLI2-mediated transactivation of target genes. Part of a corepressor complex that acts on DNA-bound GLI1. May also act by linking GLI1 to BTRC and thereby targeting GLI1 to degradation by the proteasome. Sequesters GLI1, GLI2 and GLI3 in …
MCL	12	Sky Blue 2	5	TCTN1	Tectonic family member 1; Tectonic-1; Component of the tectonic-like complex, a complex localized at the transition zone of primary cilia and acting as a barrier that prevents diffusion of transmembrane proteins between the cilia and plasma membranes. Regulator of Hedgehog (Hh), required for both activation and inhibition of the Hh pathway in the patterning of the neural tube. During neural tube …
MCL	13	Cornflower Blue	4	PIGK	Phosphatidylinositol glycan anchor biosynthesis class k; GPI-anchor transamidase; Mediates GPI anchoring in the endoplasmic reticulum, by replacing a protein's C-terminal GPI attachment signal peptide with a pre-assembled GPI. During this transamidation reaction, the GPI transamidase forms a carbonyl intermediate with the substrate protein; Belongs to the peptidase C13 family
MCL	13	Cornflower Blue	4	PIGO	GPI ethanolamine phosphate transferase 3; Ethanolamine phosphate transferase involved in glycosylphosphatidylinositol-anchor biosynthesis. Transfers ethanolamine phosphate to the GPI third mannose which links the GPI-anchor to the C-terminus of the proteins by an amide bond; Belongs to the PIGG/PIGN/PIGO family. PIGO subfamily
MCL	13	Cornflower Blue	4	PIGQ	Phosphatidylinositol N-acetylglucosaminyltransferase subunit Q; Part of the complex catalyzing the transfer of N- acetylglucosamine from UDP-N-acetylglucosamine to phosphatidylinositol, the first step of GPI biosynthesis; Belongs to the PIGQ family
MCL	13	Cornflower Blue	4	PIGS	Phosphatidylinositol glycan anchor biosynthesis class s; GPI transamidase component PIG-S; Component of the GPI transamidase complex. Essential for transfer of GPI to proteins, particularly for formation of carbonyl intermediates; Belongs to the PIGS family
MCL	14	Blue	4	EBP	3-beta-hydroxysteroid-Delta(8),Delta(7)-isomerase; Catalyzes the conversion of Delta(8)-sterols to their corresponding Delta(7)-isomers; Belongs to the EBP family
MCL	14	Blue	4	LSS	Lanosterol synthase; Catalyzes the cyclization of (S)-2,3 oxidosqualene to lanosterol, a reaction that forms the sterol nucleus. Through the production of lanosterol may regulate lens protein aggregation and increase transparency; Belongs to the terpene cyclase/mutase family
MCL	14	Blue	4	PACS2	Phosphofurin acidic cluster sorting protein 2; Multifunctional sorting protein that controls the endoplasmic reticulum (ER)-mitochondria communication, including the apposition of mitochondria with the ER and ER homeostasis. In addition, in response to apoptic inducer, translocates BIB to mitochondria, which initiates a sequence of events including the formation of mitochondrial truncated BID, th…
MCL	14	Blue	4	SIGMAR1	Sigma non-opioid intracellular receptor 1; Functions in lipid transport from the endoplasmic reticulum and is involved in a wide array of cellular functions probably through regulation of the biogenesis of lipid microdomains at the plasma membrane. Involved in the regulation of different receptors it plays a role in BDNF signaling and EGF signaling. Also regulates ion channels like the potassium …
MCL	15	Medium Slate Blue	4	CAPZA2	Capping actin protein of muscle z-line alpha subunit 2; F-actin-capping protein subunit alpha-2; F-actin-capping proteins bind in a Ca(2+)-independent manner to the fast growing ends of actin filaments (barbed end) thereby blocking the exchange of subunits at these ends. Unlike other capping proteins (such as gelsolin and severin), these proteins do not sever actin filaments
MCL	15	Medium Slate Blue	4	RAB18	Ras-related protein Rab-18; RAB18, member RAS oncogene family
MCL	15	Medium Slate Blue	4	RAB3GAP1	Rab3 GTPase-activating protein catalytic subunit; Probable catalytic subunit of a GTPase activating protein that has specificity for Rab3 subfamily (RAB3A, RAB3B, RAB3C and RAB3D). Rab3 proteins are involved in regulated exocytosis of neurotransmitters and hormones. Specifically converts active Rab3-GTP to the inactive form Rab3-GDP. Required for normal eye and brain development. May participate …
MCL	15	Medium Slate Blue	4	UPF3B	Regulator of nonsense transcripts 3B; Involved in nonsense-mediated decay (NMD) of mRNAs containing premature stop codons by associating with the nuclear exon junction complex (EJC) and serving as link between the EJC core and NMD machinery. Recruits UPF2 at the cytoplasmic side of the nuclear envelope and the subsequent formation of an UPF1-UPF2- UPF3 surveillance complex (including UPF1 bound t…
MCL	16	Medium Purple	3	G6PC3	Glucose-6-phosphatase 3; Hydrolyzes glucose-6-phosphate to glucose in the endoplasmic reticulum. May form with the glucose-6-phosphate transporter (SLC37A4/G6PT) a ubiquitously expressed complex responsible for glucose production through glycogenolysis and gluconeogenesis. Probably required for normal neutrophil function; Glucose 6-phosphatases, catalytic
MCL	16	Medium Purple	3	GPI	Glucose-6-phosphate isomerase; Besides it's role as a glycolytic enzyme, mammalian GPI can function as a tumor-secreted cytokine and an angiogenic factor (AMF) that stimulates endothelial cell motility. GPI is also a neurotrophic factor (Neuroleukin) for spinal and sensory neurons
MCL	16	Medium Purple	3	HAX1	HCLS1-associated protein X-1; Recruits the Arp2/3 complex to the cell cortex and regulates reorganization of the cortical actin cytoskeleton via its interaction with KCNC3 and the Arp2/3 complex. Slows down the rate of inactivation of KCNC3 channels. Promotes GNA13-mediated cell migration. Involved in the clathrin-mediated endocytosis pathway. May be involved in internalization of ABC transporter…
MCL	17	Medium Purple 2	3	RASA1	Ras GTPase-activating protein 1; Inhibitory regulator of the Ras-cyclic AMP pathway. Stimulates the GTPase of normal but not oncogenic Ras p21; this stimulation may be further increased in the presence of NCK1; C2 and RasGAP domain containing
MCL	17	Medium Purple 2	3	SOS2	Sos ras/rho guanine nucleotide exchange factor 2; Son of sevenless homolog 2; Promotes the exchange of Ras-bound GDP by GTP; Pleckstrin homology domain containing
MCL	17	Medium Purple 2	3	SPRED2	Sprouty-related, EVH1 domain-containing protein 2; Negatively regulates Ras signaling pathways and downstream activation of MAP kinases
MCL	18	Orchid 3	3	DNAJC6	Dnaj heat shock protein family (hsp40) member c6; Putative tyrosine-protein phosphatase auxilin; Recruits HSPA8/HSC70 to clathrin-coated vesicles and promotes uncoating of clathrin-coated vesicles. Plays a role in clathrin-mediated endocytosis in neurons (By similarity); C2 tensin-type domain containing
MCL	18	Orchid 3	3	PROC	Vitamin K-dependent protein C; Protein C is a vitamin K-dependent serine protease that regulates blood coagulation by inactivating factors Va and VIIIa in the presence of calcium ions and phospholipids. Exerts a protective effect on the endothelial cell barrier function; Belongs to the peptidase S1 family
MCL	18	Orchid 3	3	TMPRSS6	Transmembrane protease serine 6; Serine protease which hydrolyzes a range of proteins including type I collagen, fibronectin and fibrinogen. Can also activate urokinase-type plasminogen activator with low efficiency. May play a specialized role in matrix remodeling processes in liver. Through the cleavage of HFE2, a regulator of the expression of the iron absorption-regulating hormone hepicidin/H…
MCL	19	Orchid 2	3	ALDH3A2	Aldehyde dehydrogenase 3 family member a2; Fatty aldehyde dehydrogenase; Catalyzes the oxidation of long-chain aliphatic aldehydes to fatty acids. Active on a variety of saturated and unsaturated aliphatic aldehydes between 6 and 24 carbons in length. Responsible for conversion of the sphingosine 1-phosphate (S1P) degradation product hexadecenal to hexadecenoic acid
MCL	19	Orchid 2	3	PEX10	Peroxisome biogenesis factor 10; Somewhat implicated in the biogenesis of peroxisomes; Peroxins
MCL	19	Orchid 2	3	PEX16	Peroxisomal membrane protein PEX16; Required for peroxisome membrane biogenesis. May play a role in early stages of peroxisome assembly. Can recruit other peroxisomal proteins, such as PEX3 and PMP34, to de novo peroxisomes derived from the endoplasmic reticulum (ER). May function as receptor for PEX3; Belongs to the peroxin-16 family
MCL	20	Purple	3	CLCN2	Chloride channel protein 2; Voltage-gated chloride channel. Chloride channels have several functions including the regulation of cell volume; membrane potential stabilization, signal transduction and transepithelial transport; Belongs to the chloride channel (TC 2.A.49) family. ClC-2/CLCN2 subfamily
MCL	20	Purple	3	GLRB	Glycine receptor subunit beta; Glycine receptors are ligand-gated chloride channels. GLRB does not form ligand-gated ion channels by itself, but is part of heteromeric ligand-gated chloride channels. Channel opening is triggered by extracellular glycine. Heteropentameric channels composed of GLRB and GLRA1 are activated by lower glycine levels than homopentameric GLRA1. Plays an important role in…
MCL	20	Purple	3	SLC6A5	Solute carrier family 6 (neurotransmitter transporter, glycine) member 5/9; Sodium- and chloride-dependent glycine transporter 2; Terminates the action of glycine by its high affinity sodium-dependent reuptake into presynaptic terminals. May be responsible for the termination of neurotransmission at strychnine-sensitive glycinergic synapses; Belongs to the sodium:neurotransmitter symporter (SNF) …
MCL	21	Orchid	3	PARN	Poly(A)-specific ribonuclease PARN; 3'-exoribonuclease that has a preference for poly(A) tails of mRNAs, thereby efficiently degrading poly(A) tails. Exonucleolytic degradation of the poly(A) tail is often the first step in the decay of eukaryotic mRNAs and is also used to silence certain maternal mRNAs translationally during oocyte maturation and early embryonic development. Interacts with both …
MCL	21	Orchid	3	RTEL1	Regulator of telomere elongation helicase 1; ATP-dependent DNA helicase implicated in telomere-length regulation, DNA repair and the maintenance of genomic stability. Acts as an anti-recombinase to counteract toxic recombination and limit crossover during meiosis. Regulates meiotic recombination and crossover homeostasis by physically dissociating strand invasion events and thereby promotes noncr…
MCL	21	Orchid	3	XRCC2	DNA repair protein XRCC2; Involved in the homologous recombination repair (HRR) pathway of double-stranded DNA, thought to repair chromosomal fragmentation, translocations and deletions. Part of the Rad21 paralog protein complex BCDX2 which acts in the BRCA1-BRCA2- dependent HR pathway. Upon DNA damage, BCDX2 acts downstream of BRCA2 recruitment and upstream of RAD51 recruitment. BCDX2 binds pred…
MCL	22	Pink	2	PTPN23	Tyrosine-protein phosphatase non-receptor type 23; Plays a role in sorting of endocytic ubiquitinated cargos into multivesicular bodies (MVBs) via its interaction with the ESCRT-I complex (endosomal sorting complex required for transport I), and possibly also other ESCRT complexes. May act as a negative regulator of Ras-mediated mitogenic activity. Plays a role in ciliogenesis; Protein tyrosine p…
MCL	22	Pink	2	VPS4A	Vacuolar protein sorting-associated protein 4A; Involved in late steps of the endosomal multivesicular bodies (MVB) pathway. Recognizes membrane-associated ESCRT-III assemblies and catalyzes their disassembly, possibly in combination with membrane fission. Redistributes the ESCRT-III components to the cytoplasm for further rounds of MVB sorting. MVBs contain intraluminal vesicles (ILVs) that are …
MCL	23	Hot Pink	2	ASPA	Aspartoacylase; Catalyzes the deacetylation of N-acetylaspartic acid (NAA) to produce acetate and L-aspartate. NAA occurs in high concentration in brain and its hydrolysis NAA plays a significant part in the maintenance of intact white matter. In other tissues it act as a scavenger of NAA from body fluids
MCL	23	Hot Pink	2	SUMF1	Formylglycine-generating enzyme; Sulfatase-modifying factor 1; Using molecular oxygen and an unidentified reducing agent, oxidizes a cysteine residue in the substrate sulfatase to an active site 3-oxoalanine residue, which is also called C(alpha)-formylglycine. Known substrates include GALNS, ARSA, STS and ARSE; Belongs to the sulfatase-modifying factor family
MCL	24	Light Coral	2	CDC45	Cell division control protein 45 homolog; Required for initiation of chromosomal DNA replication
MCL	24	Light Coral	2	CKAP2L	Cytoskeleton-associated protein 2-like; Microtubule-associated protein required for mitotic spindle formation and cell-cycle progression in neural progenitor cells

## Sheet: Enrichment subnetwork1 dsld kme
#category	term ID	term description	observed gene count	background gene count	strength	false discovery rate	matching proteins in your network (labels)
GO Biological Process
GO Process	GO:0006325	Chromatin organization	19	713	1.0	1.80e-10	H3F3B,KDM6B,SRCAP,SETD1A,SMARCA2,SMARCC2,NCOR1,SUV420H1,PPM1D,HIST1H1E,SOX2,ACTB,GATAD2B,HDAC8,KDM5C,ZMYND11,TET3,KAT8,DPF2
GO Process	GO:0045934	Negative regulation of nucleobase-containing compound metabolic process	24	1528	0.77	9.52e-10	H3F3B,SMARCA2,SMARCC2,NCOR1,NOTCH1,PPM1D,HIST1H1E,SOX2,NR2F1,WT1,POU1F1,MTOR,GATAD2B,FLNA,HDAC8,KDM5C,TDP2,TRIP12,TBR1,ZMYND11,SOX5,KAT8,DPF2,MEIS2
GO Process	GO:0051253	Negative regulation of rna metabolic process	23	1422	0.78	1.41e-09	H3F3B,SMARCA2,SMARCC2,NCOR1,NOTCH1,PPM1D,HIST1H1E,SOX2,NR2F1,WT1,POU1F1,MTOR,GATAD2B,FLNA,HDAC8,KDM5C,TDP2,TBR1,ZMYND11,SOX5,KAT8,DPF2,MEIS2
GO Process	GO:1903507	Negative regulation of nucleic acid-templated transcription	22	1324	0.8	2.51e-09	H3F3B,SMARCA2,SMARCC2,NCOR1,NOTCH1,PPM1D,HIST1H1E,SOX2,NR2F1,WT1,POU1F1,GATAD2B,FLNA,HDAC8,KDM5C,TDP2,TBR1,ZMYND11,SOX5,KAT8,DPF2,MEIS2
GO Process	GO:0045892	Negative regulation of transcription, dna-templated	21	1273	0.79	7.80e-09	H3F3B,SMARCA2,SMARCC2,NCOR1,NOTCH1,PPM1D,HIST1H1E,SOX2,NR2F1,WT1,POU1F1,GATAD2B,FLNA,HDAC8,KDM5C,TBR1,ZMYND11,SOX5,KAT8,DPF2,MEIS2
GO Process	GO:0009892	Negative regulation of metabolic process	28	3124	0.53	4.00e-07	H3F3B,SRCAP,SMARCA2,SMARCC2,NCOR1,NOTCH1,YWHAG,PPM1D,HIST1H1E,SOX2,NR2F1,WT1,POU1F1,RAC1,MTOR,GATAD2B,FLNA,HDAC8,KDM5C,TDP2,TRIP12,TBR1,BCKDK,ZMYND11,SOX5,KAT8,DPF2,MEIS2
GO Process	GO:0010605	Negative regulation of macromolecule metabolic process	27	2875	0.55	4.00e-07	H3F3B,SRCAP,SMARCA2,SMARCC2,NCOR1,NOTCH1,YWHAG,PPM1D,HIST1H1E,SOX2,NR2F1,WT1,POU1F1,RAC1,MTOR,GATAD2B,FLNA,HDAC8,KDM5C,TDP2,TRIP12,TBR1,ZMYND11,SOX5,KAT8,DPF2,MEIS2
GO Process	GO:0010629	Negative regulation of gene expression	23	2014	0.63	4.00e-07	H3F3B,SRCAP,SMARCA2,SMARCC2,NCOR1,NOTCH1,PPM1D,HIST1H1E,SOX2,NR2F1,WT1,POU1F1,RAC1,GATAD2B,FLNA,HDAC8,KDM5C,TBR1,ZMYND11,SOX5,KAT8,DPF2,MEIS2
GO Process	GO:0051172	Negative regulation of nitrogen compound metabolic process	25	2429	0.59	4.00e-07	H3F3B,SMARCA2,SMARCC2,NCOR1,NOTCH1,YWHAG,PPM1D,HIST1H1E,SOX2,NR2F1,WT1,POU1F1,MTOR,GATAD2B,FLNA,HDAC8,KDM5C,TDP2,TRIP12,TBR1,ZMYND11,SOX5,KAT8,DPF2,MEIS2
GO Process	GO:0006996	Organelle organization	29	3450	0.5	5.84e-07	H3F3B,KDM6B,SRCAP,SETD1A,SMARCA2,SMARCC2,NCOR1,NOTCH1,TUB,SUV420H1,YWHAG,PPM1D,HIST1H1E,FGF13,SOX2,DCX,RAC1,ACTB,MTOR,ACTA1,GATAD2B,FLNA,HDAC8,KDM5C,ZMYND11,TET3,KAT8,DPF2,ACTG1
GO Process	GO:0031324	Negative regulation of cellular metabolic process	25	2630	0.55	1.53e-06	H3F3B,SMARCA2,SMARCC2,NCOR1,NOTCH1,YWHAG,PPM1D,HIST1H1E,SOX2,NR2F1,WT1,POU1F1,MTOR,GATAD2B,FLNA,HDAC8,KDM5C,TDP2,TRIP12,TBR1,ZMYND11,SOX5,KAT8,DPF2,MEIS2
GO Process	GO:0048731	System development	32	4426	0.43	1.53e-06	GSS,H3F3B,KDM6B,SMARCA2,SMARCC2,NOTCH1,TUB,SUV420H1,YWHAG,FGF13,SOX2,NR2F1,WT1,MC2R,DCX,POU1F1,COL18A1,RAC1,ACTB,TGFBR2,LAMC3,MTOR,ACTA1,FLNA,ECE1,TDP2,TBR1,SOX5,KAT8,DPF2,MEIS2,ACTG1
GO Process	GO:0019222	Regulation of metabolic process	39	6948	0.32	5.31e-06	H3F3B,KDM6B,SRCAP,SMARCA2,SMARCC2,NCOR1,NOTCH1,SUV420H1,YWHAG,PPM1D,HIST1H1E,FGF13,SOX2,NR2F1,WT1,MC2R,POU1F1,RAC1,ACTB,TGFBR2,MTOR,ACTA1,GATAD2B,FLNA,HDAC8,ECE1,KDM5C,TDP2,CDK8,TRIP12,TBR1,BCKDK,ZMYND11,TET3,SOX5,KAT8,DPF2,MEIS2,ACTG1
GO Process	GO:0010604	Positive regulation of macromolecule metabolic process	28	3600	0.47	7.03e-06	KDM6B,SRCAP,SMARCA2,SMARCC2,NCOR1,NOTCH1,SUV420H1,HIST1H1E,FGF13,SOX2,NR2F1,WT1,POU1F1,RAC1,ACTB,TGFBR2,MTOR,ACTA1,HDAC8,ECE1,CDK8,TBR1,TET3,SOX5,KAT8,DPF2,MEIS2,ACTG1
GO Process	GO:0007275	Multicellular organism development	33	5023	0.39	7.05e-06	GSS,H3F3B,KDM6B,SMARCA2,SMARCC2,NOTCH1,TUB,SUV420H1,YWHAG,FGF13,SOX2,NR2F1,WT1,MC2R,DCX,POU1F1,COL18A1,RAC1,ACTB,TGFBR2,LAMC3,MTOR,ACTA1,FLNA,ECE1,TDP2,TBR1,TET3,SOX5,KAT8,DPF2,MEIS2,ACTG1
GO Process	GO:0060255	Regulation of macromolecule metabolic process	37	6407	0.34	1.01e-05	H3F3B,KDM6B,SRCAP,SMARCA2,SMARCC2,NCOR1,NOTCH1,SUV420H1,YWHAG,PPM1D,HIST1H1E,FGF13,SOX2,NR2F1,WT1,POU1F1,RAC1,ACTB,TGFBR2,MTOR,ACTA1,GATAD2B,FLNA,HDAC8,ECE1,KDM5C,TDP2,CDK8,TRIP12,TBR1,ZMYND11,TET3,SOX5,KAT8,DPF2,MEIS2,ACTG1
GO Process	GO:0019219	Regulation of nucleobase-containing compound metabolic process	29	3982	0.44	1.20e-05	H3F3B,KDM6B,SRCAP,SMARCA2,SMARCC2,NCOR1,NOTCH1,SUV420H1,PPM1D,HIST1H1E,SOX2,NR2F1,WT1,POU1F1,MTOR,GATAD2B,FLNA,HDAC8,KDM5C,TDP2,CDK8,TRIP12,TBR1,ZMYND11,TET3,SOX5,KAT8,DPF2,MEIS2
GO Process	GO:0045165	Cell fate commitment	9	248	1.14	1.20e-05	KDM6B,NOTCH1,FGF13,SOX2,WT1,POU1F1,MTOR,TBR1,SOX5
GO Process	GO:1903506	Regulation of nucleic acid-templated transcription	27	3447	0.47	1.20e-05	H3F3B,KDM6B,SRCAP,SMARCA2,SMARCC2,NCOR1,NOTCH1,PPM1D,HIST1H1E,SOX2,NR2F1,WT1,POU1F1,MTOR,GATAD2B,FLNA,HDAC8,KDM5C,TDP2,CDK8,TBR1,ZMYND11,TET3,SOX5,KAT8,DPF2,MEIS2
GO Process	GO:1903508	Positive regulation of nucleic acid-templated transcription	19	1670	0.63	1.20e-05	KDM6B,SRCAP,SMARCA2,SMARCC2,NOTCH1,HIST1H1E,SOX2,NR2F1,WT1,POU1F1,MTOR,HDAC8,CDK8,TBR1,TET3,SOX5,KAT8,DPF2,MEIS2
GO Process	GO:0016570	Histone modification	10	351	2023-03-01	1.39e-05	KDM6B,SRCAP,SETD1A,SUV420H1,HIST1H1E,HDAC8,KDM5C,TET3,KAT8,DPF2
GO Process	GO:0010557	Positive regulation of macromolecule biosynthetic process	20	1906	0.6	1.54e-05	KDM6B,SRCAP,SMARCA2,SMARCC2,NOTCH1,HIST1H1E,SOX2,NR2F1,WT1,POU1F1,RAC1,MTOR,HDAC8,CDK8,TBR1,TET3,SOX5,KAT8,DPF2,MEIS2
GO Process	GO:0010628	Positive regulation of gene expression	22	2337	0.55	1.59e-05	KDM6B,SMARCA2,SMARCC2,NCOR1,NOTCH1,HIST1H1E,SOX2,NR2F1,WT1,POU1F1,ACTB,MTOR,ACTA1,HDAC8,CDK8,TBR1,TET3,SOX5,KAT8,DPF2,MEIS2,ACTG1
GO Process	GO:0045935	Positive regulation of nucleobase-containing compound metabolic process	20	1927	0.59	1.68e-05	KDM6B,SRCAP,SMARCA2,SMARCC2,NOTCH1,SUV420H1,HIST1H1E,SOX2,NR2F1,WT1,POU1F1,MTOR,HDAC8,CDK8,TBR1,TET3,SOX5,KAT8,DPF2,MEIS2
GO Process	GO:0007399	Nervous system development	22	2371	0.54	1.88e-05	GSS,KDM6B,SMARCA2,SMARCC2,NOTCH1,YWHAG,FGF13,SOX2,NR2F1,DCX,POU1F1,RAC1,ACTB,TGFBR2,LAMC3,MTOR,FLNA,TDP2,TBR1,SOX5,DPF2,MEIS2
GO Process	GO:0006357	Regulation of transcription by rna polymerase ii	21	2172	0.56	2.11e-05	KDM6B,SRCAP,SMARCA2,SMARCC2,NCOR1,NOTCH1,HIST1H1E,SOX2,NR2F1,WT1,POU1F1,GATAD2B,HDAC8,CDK8,TBR1,ZMYND11,TET3,SOX5,KAT8,DPF2,MEIS2
GO Process	GO:0045893	Positive regulation of transcription, dna-templated	18	1587	0.63	2.38e-05	KDM6B,SMARCA2,SMARCC2,NOTCH1,HIST1H1E,SOX2,NR2F1,WT1,POU1F1,MTOR,HDAC8,CDK8,TBR1,TET3,SOX5,KAT8,DPF2,MEIS2
GO Process	GO:0006355	Regulation of transcription, dna-templated	26	3388	0.46	2.43e-05	H3F3B,KDM6B,SRCAP,SMARCA2,SMARCC2,NCOR1,NOTCH1,PPM1D,HIST1H1E,SOX2,NR2F1,WT1,POU1F1,MTOR,GATAD2B,FLNA,HDAC8,KDM5C,CDK8,TBR1,ZMYND11,TET3,SOX5,KAT8,DPF2,MEIS2
GO Process	GO:0031328	Positive regulation of cellular biosynthetic process	20	2005	0.57	2.60e-05	KDM6B,SRCAP,SMARCA2,SMARCC2,NOTCH1,HIST1H1E,SOX2,NR2F1,WT1,POU1F1,RAC1,MTOR,HDAC8,CDK8,TBR1,TET3,SOX5,KAT8,DPF2,MEIS2
GO Process	GO:0006338	Chromatin remodeling	8	206	1.16	2.68e-05	H3F3B,KDM6B,SRCAP,SMARCA2,SMARCC2,ACTB,GATAD2B,KDM5C
GO Process	GO:0010468	Regulation of gene expression	31	4813	0.38	2.68e-05	H3F3B,KDM6B,SRCAP,SMARCA2,SMARCC2,NCOR1,NOTCH1,PPM1D,HIST1H1E,SOX2,NR2F1,WT1,POU1F1,RAC1,ACTB,TGFBR2,MTOR,ACTA1,GATAD2B,FLNA,HDAC8,KDM5C,CDK8,TBR1,ZMYND11,TET3,SOX5,KAT8,DPF2,MEIS2,ACTG1
GO Process	GO:0016043	Cellular component organization	33	5447	0.36	2.84e-05	H3F3B,KDM6B,SRCAP,SETD1A,SMARCA2,SMARCC2,NCOR1,NOTCH1,TUB,SUV420H1,YWHAG,PPM1D,HIST1H1E,FGF13,SOX2,WT1,DCX,COL18A1,RAC1,ACTB,LAMC3,MTOR,ACTA1,PSEN2,GATAD2B,FLNA,HDAC8,KDM5C,ZMYND11,TET3,KAT8,DPF2,ACTG1
GO Process	GO:0010556	Regulation of macromolecule biosynthetic process	28	3976	0.42	2.90e-05	H3F3B,KDM6B,SRCAP,SMARCA2,SMARCC2,NCOR1,NOTCH1,PPM1D,HIST1H1E,SOX2,NR2F1,WT1,POU1F1,RAC1,MTOR,GATAD2B,FLNA,HDAC8,KDM5C,TDP2,CDK8,TBR1,ZMYND11,TET3,SOX5,KAT8,DPF2,MEIS2
GO Process	GO:0051171	Regulation of nitrogen compound metabolic process	34	5836	0.34	3.54e-05	H3F3B,KDM6B,SRCAP,SMARCA2,SMARCC2,NCOR1,NOTCH1,SUV420H1,YWHAG,PPM1D,HIST1H1E,FGF13,SOX2,NR2F1,WT1,POU1F1,RAC1,ACTB,TGFBR2,MTOR,GATAD2B,FLNA,HDAC8,KDM5C,TDP2,CDK8,TRIP12,TBR1,ZMYND11,TET3,SOX5,KAT8,DPF2,MEIS2
GO Process	GO:0032502	Developmental process	34	5841	0.34	3.55e-05	GSS,H3F3B,KDM6B,KYNU,SMARCA2,SMARCC2,NOTCH1,TUB,SUV420H1,YWHAG,FGF13,SOX2,NR2F1,WT1,MC2R,DCX,POU1F1,COL18A1,RAC1,ACTB,TGFBR2,LAMC3,MTOR,ACTA1,FLNA,ECE1,TDP2,TBR1,TET3,SOX5,KAT8,DPF2,MEIS2,ACTG1
GO Process	GO:0031323	Regulation of cellular metabolic process	35	6239	0.32	4.64e-05	H3F3B,KDM6B,SRCAP,SMARCA2,SMARCC2,NCOR1,NOTCH1,SUV420H1,YWHAG,PPM1D,HIST1H1E,FGF13,SOX2,NR2F1,WT1,POU1F1,RAC1,ACTB,TGFBR2,MTOR,GATAD2B,FLNA,HDAC8,ECE1,KDM5C,TDP2,CDK8,TRIP12,TBR1,ZMYND11,TET3,SOX5,KAT8,DPF2,MEIS2
GO Process	GO:0031326	Regulation of cellular biosynthetic process	28	4125	0.41	5.75e-05	H3F3B,KDM6B,SRCAP,SMARCA2,SMARCC2,NCOR1,NOTCH1,PPM1D,HIST1H1E,SOX2,NR2F1,WT1,POU1F1,RAC1,MTOR,GATAD2B,FLNA,HDAC8,KDM5C,TDP2,CDK8,TBR1,ZMYND11,TET3,SOX5,KAT8,DPF2,MEIS2
GO Process	GO:2000112	Regulation of cellular macromolecule biosynthetic process	27	3878	0.42	6.51e-05	H3F3B,KDM6B,SRCAP,SMARCA2,SMARCC2,NCOR1,NOTCH1,PPM1D,HIST1H1E,SOX2,NR2F1,WT1,POU1F1,RAC1,MTOR,GATAD2B,FLNA,HDAC8,KDM5C,CDK8,TBR1,ZMYND11,TET3,SOX5,KAT8,DPF2,MEIS2
GO Process	GO:0080090	Regulation of primary metabolic process	34	6032	0.33	7.55e-05	H3F3B,KDM6B,SRCAP,SMARCA2,SMARCC2,NCOR1,NOTCH1,SUV420H1,YWHAG,PPM1D,HIST1H1E,FGF13,SOX2,NR2F1,WT1,POU1F1,RAC1,ACTB,TGFBR2,MTOR,GATAD2B,FLNA,HDAC8,KDM5C,TDP2,CDK8,TRIP12,TBR1,ZMYND11,TET3,SOX5,KAT8,DPF2,MEIS2
GO Process	GO:0048519	Negative regulation of biological process	32	5389	0.35	7.58e-05	H3F3B,SRCAP,SMARCA2,SMARCC2,NCOR1,NOTCH1,YWHAG,PPM1D,HIST1H1E,FGF13,SOX2,NR2F1,WT1,POU1F1,COL18A1,RAC1,TGFBR2,MTOR,PSEN2,GATAD2B,FLNA,HDAC8,KDM5C,TDP2,TRIP12,TBR1,BCKDK,ZMYND11,SOX5,KAT8,DPF2,MEIS2
GO Process	GO:0048518	Positive regulation of biological process	34	6112	0.32	0.00010	H3F3B,KDM6B,SRCAP,SMARCA2,SMARCC2,NCOR1,NOTCH1,TUB,SUV420H1,YWHAG,HIST1H1E,FGF13,SOX2,NR2F1,WT1,POU1F1,COL18A1,RAC1,ACTB,TGFBR2,MTOR,ACTA1,PSEN2,FLNA,HDAC8,ECE1,CDK8,TBR1,TET3,SOX5,KAT8,DPF2,MEIS2,ACTG1
GO Process	GO:0000122	Negative regulation of transcription by rna polymerase ii	13	895	0.74	0.00011	SMARCA2,NCOR1,NOTCH1,HIST1H1E,SOX2,NR2F1,WT1,POU1F1,GATAD2B,HDAC8,TBR1,DPF2,MEIS2
GO Process	GO:0048523	Negative regulation of cellular process	30	4874	0.36	0.00011	H3F3B,SMARCA2,SMARCC2,NCOR1,NOTCH1,YWHAG,PPM1D,HIST1H1E,FGF13,SOX2,NR2F1,WT1,POU1F1,COL18A1,RAC1,TGFBR2,MTOR,PSEN2,GATAD2B,FLNA,HDAC8,KDM5C,TDP2,TRIP12,TBR1,ZMYND11,SOX5,KAT8,DPF2,MEIS2
GO Process	GO:0045944	Positive regulation of transcription by rna polymerase ii	15	1253	0.65	0.00013	KDM6B,SMARCA2,NOTCH1,SOX2,NR2F1,WT1,POU1F1,HDAC8,CDK8,TBR1,TET3,SOX5,KAT8,DPF2,MEIS2
GO Process	GO:0007417	Central nervous system development	13	988	0.69	0.00031	KDM6B,NOTCH1,FGF13,SOX2,DCX,POU1F1,ACTB,TGFBR2,LAMC3,MTOR,FLNA,TBR1,MEIS2
GO Process	GO:0031325	Positive regulation of cellular metabolic process	24	3413	0.42	0.00035	KDM6B,SRCAP,SMARCA2,SMARCC2,NOTCH1,SUV420H1,HIST1H1E,FGF13,SOX2,NR2F1,WT1,POU1F1,RAC1,TGFBR2,MTOR,HDAC8,ECE1,CDK8,TBR1,TET3,SOX5,KAT8,DPF2,MEIS2
GO Process	GO:0048513	Animal organ development	23	3197	0.43	0.00044	H3F3B,KDM6B,NOTCH1,TUB,SUV420H1,FGF13,SOX2,WT1,MC2R,DCX,POU1F1,COL18A1,ACTB,TGFBR2,LAMC3,MTOR,ACTA1,FLNA,ECE1,TBR1,SOX5,KAT8,MEIS2
GO Process	GO:0050789	Regulation of biological process	46	11475	0.18	0.00055	H3F3B,KDM6B,SRCAP,SETD1A,SMARCA2,SMARCC2,NCOR1,NOTCH1,TUB,SUV420H1,YWHAG,PPM1D,HIST1H1E,FGF13,SOX2,NR2F1,WT1,MC2R,DCX,POU1F1,COL18A1,RAC1,ACTB,TGFBR2,MTOR,ACTA1,PSEN2,GATAD2B,FLNA,HDAC8,ECE1,KDM5C,TDP2,CDK8,TRIP12,TBR1,BCKDK,ZMYND11,TXNRD2,FBXO11,TET3,SOX5,KAT8,DPF2,MEIS2,ACTG1
GO Process	GO:0051173	Positive regulation of nitrogen compound metabolic process	23	3239	0.43	0.00055	KDM6B,SRCAP,SMARCA2,SMARCC2,NOTCH1,SUV420H1,HIST1H1E,FGF13,SOX2,NR2F1,WT1,POU1F1,RAC1,TGFBR2,MTOR,HDAC8,CDK8,TBR1,TET3,SOX5,KAT8,DPF2,MEIS2
GO Process	GO:0048522	Positive regulation of cellular process	31	5579	0.32	0.00058	H3F3B,KDM6B,SRCAP,SMARCA2,SMARCC2,NOTCH1,TUB,SUV420H1,YWHAG,HIST1H1E,FGF13,SOX2,NR2F1,WT1,POU1F1,COL18A1,RAC1,TGFBR2,MTOR,PSEN2,FLNA,HDAC8,ECE1,CDK8,TBR1,TET3,SOX5,KAT8,DPF2,MEIS2,ACTG1
GO Process	GO:0048468	Cell development	16	1629	0.57	0.00060	H3F3B,SMARCA2,NOTCH1,WT1,DCX,POU1F1,COL18A1,RAC1,ACTB,TGFBR2,LAMC3,MTOR,ACTA1,FLNA,TDP2,ACTG1
GO Process	GO:0007420	Brain development	11	745	0.74	0.00070	KDM6B,NOTCH1,FGF13,SOX2,POU1F1,ACTB,TGFBR2,MTOR,FLNA,TBR1,MEIS2
GO Process	GO:0018023	Peptidyl-lysine trimethylation	4	36	1.62	0.00070	SETD1A,SUV420H1,HIST1H1E,TET3
GO Process	GO:2000026	Regulation of multicellular organismal development	18	2096	0.51	0.00076	H3F3B,SETD1A,NOTCH1,SUV420H1,YWHAG,FGF13,SOX2,NR2F1,WT1,RAC1,TGFBR2,MTOR,FLNA,TRIP12,TBR1,SOX5,DPF2,MEIS2
GO Process	GO:0042692	Muscle cell differentiation	7	244	2023-03-01	0.00077	H3F3B,KDM6B,NOTCH1,WT1,MTOR,ACTA1,ACTG1
GO Process	GO:0043044	ATP-dependent chromatin remodeling	5	91	1.32	0.00098	SRCAP,SMARCA2,SMARCC2,ACTB,GATAD2B
GO Process	GO:0030154	Cell differentiation	24	3702	0.39	0.0013	H3F3B,KDM6B,SMARCA2,NOTCH1,YWHAG,FGF13,SOX2,NR2F1,WT1,DCX,POU1F1,COL18A1,RAC1,ACTB,TGFBR2,LAMC3,MTOR,ACTA1,FLNA,TDP2,TBR1,SOX5,KAT8,ACTG1
GO Process	GO:0150105	Protein localization to cell-cell junction	3	12	1.97	0.0013	ACTB,FLNA,ACTG1
GO Process	GO:0032501	Multicellular organismal process	34	6933	0.27	0.0018	GSS,H3F3B,KDM6B,SMARCA2,SMARCC2,NOTCH1,TUB,SUV420H1,YWHAG,FGF13,SOX2,NR2F1,WT1,MC2R,DCX,POU1F1,COL18A1,RAC1,ACTB,TGFBR2,LAMC3,MTOR,ACTA1,FLNA,ECE1,TDP2,TBR1,FBXO11,TET3,SOX5,KAT8,DPF2,MEIS2,ACTG1
GO Process	GO:0050794	Regulation of cellular process	44	10932	0.18	0.0018	H3F3B,KDM6B,SRCAP,SETD1A,SMARCA2,SMARCC2,NCOR1,NOTCH1,TUB,SUV420H1,YWHAG,PPM1D,HIST1H1E,FGF13,SOX2,NR2F1,WT1,MC2R,DCX,POU1F1,COL18A1,RAC1,ACTB,TGFBR2,MTOR,PSEN2,GATAD2B,FLNA,HDAC8,ECE1,KDM5C,TDP2,CDK8,TRIP12,TBR1,ZMYND11,TXNRD2,FBXO11,TET3,SOX5,KAT8,DPF2,MEIS2,ACTG1
GO Process	GO:0018205	Peptidyl-lysine modification	7	299	0.94	0.0025	SRCAP,SETD1A,SUV420H1,HIST1H1E,TET3,KAT8,DPF2
GO Process	GO:0007423	Sensory organ development	9	563	0.78	0.0027	NOTCH1,TUB,SOX2,WT1,DCX,TGFBR2,LAMC3,ECE1,MEIS2
GO Process	GO:0048729	Tissue morphogenesis	9	561	0.78	0.0027	KDM6B,NOTCH1,WT1,ACTB,TGFBR2,ACTA1,FLNA,TBR1,ACTG1
GO Process	GO:0009653	Anatomical structure morphogenesis	17	2165	0.47	0.0042	KDM6B,NOTCH1,SOX2,WT1,COL18A1,RAC1,ACTB,TGFBR2,LAMC3,MTOR,ACTA1,FLNA,ECE1,TBR1,SOX5,MEIS2,ACTG1
GO Process	GO:0050793	Regulation of developmental process	19	2648	0.43	0.0042	H3F3B,SETD1A,NOTCH1,SUV420H1,YWHAG,FGF13,SOX2,NR2F1,WT1,POU1F1,RAC1,TGFBR2,MTOR,FLNA,TRIP12,TBR1,SOX5,DPF2,MEIS2
GO Process	GO:0080182	Histone h3-k4 trimethylation	3	20	1.75	0.0045	SETD1A,HIST1H1E,TET3
GO Process	GO:0006479	Protein methylation	5	134	1.15	0.0049	SETD1A,SUV420H1,HIST1H1E,FBXO11,TET3
GO Process	GO:0051239	Regulation of multicellular organismal process	21	3227	0.39	0.0054	H3F3B,KDM6B,SETD1A,NOTCH1,SUV420H1,YWHAG,FGF13,SOX2,NR2F1,WT1,POU1F1,RAC1,TGFBR2,MTOR,FLNA,ECE1,TRIP12,TBR1,SOX5,DPF2,MEIS2
GO Process	GO:0060420	Regulation of heart growth	4	67	1.35	0.0054	NOTCH1,WT1,TGFBR2,MTOR
GO Process	GO:0061061	Muscle structure development	8	479	0.8	0.0056	H3F3B,KDM6B,NOTCH1,SUV420H1,WT1,MTOR,ACTA1,ACTG1
GO Process	GO:0034968	Histone lysine methylation	4	71	1.33	0.0066	SETD1A,SUV420H1,HIST1H1E,TET3
GO Process	GO:0001654	Eye development	7	365	0.86	0.0075	TUB,SOX2,WT1,DCX,TGFBR2,LAMC3,MEIS2
GO Process	GO:0043414	Macromolecule methylation	6	249	0.96	0.0077	SETD1A,SUV420H1,PPM1D,HIST1H1E,FBXO11,TET3
GO Process	GO:0006464	Cellular protein modification process	20	3063	0.39	0.0081	KDM6B,SRCAP,SETD1A,SUV420H1,PPM1D,HIST1H1E,FGF13,ACTB,TGFBR2,MTOR,FLNA,HDAC8,KDM5C,CDK8,TRIP12,BCKDK,FBXO11,TET3,KAT8,DPF2
GO Process	GO:0030900	Forebrain development	7	387	0.83	0.0101	KDM6B,NOTCH1,FGF13,SOX2,POU1F1,FLNA,TBR1
GO Process	GO:0045595	Regulation of cell differentiation	15	1874	0.48	0.0101	H3F3B,SETD1A,NOTCH1,YWHAG,FGF13,SOX2,NR2F1,RAC1,TGFBR2,MTOR,FLNA,TBR1,SOX5,DPF2,MEIS2
GO Process	GO:0009611	Response to wounding	8	532	0.75	0.0103	H3F3B,SOX2,RAC1,ACTB,TGFBR2,MTOR,FLNA,ACTG1
GO Process	GO:0022008	Neurogenesis	14	1657	0.5	0.0103	NOTCH1,YWHAG,FGF13,SOX2,NR2F1,DCX,RAC1,ACTB,LAMC3,MTOR,FLNA,TDP2,TBR1,SOX5
GO Process	GO:0045927	Positive regulation of growth	6	267	0.93	0.0103	H3F3B,NOTCH1,WT1,POU1F1,TGFBR2,MTOR
GO Process	GO:0018193	Peptidyl-amino acid modification	10	867	0.64	0.0108	SRCAP,SETD1A,SUV420H1,HIST1H1E,TGFBR2,MTOR,FBXO11,TET3,KAT8,DPF2
GO Process	GO:0044267	Cellular protein metabolic process	22	3696	0.35	0.0109	H3F3B,KDM6B,SRCAP,SETD1A,SUV420H1,PPM1D,HIST1H1E,FGF13,ACTB,TGFBR2,MTOR,PSEN2,FLNA,HDAC8,KDM5C,CDK8,TRIP12,BCKDK,FBXO11,TET3,KAT8,DPF2
GO Process	GO:0048013	Ephrin receptor signaling pathway	4	86	1.24	0.0116	RAC1,ACTB,PSEN2,ACTG1
GO Process	GO:0001708	Cell fate specification	4	87	1.24	0.0119	NOTCH1,SOX2,POU1F1,TBR1
GO Process	GO:0048639	Positive regulation of developmental growth	5	176	2023-03-01	0.0138	NOTCH1,WT1,POU1F1,TGFBR2,MTOR
GO Process	GO:0044260	Cellular macromolecule metabolic process	26	4976	0.29	0.0148	H3F3B,KDM6B,SRCAP,SETD1A,NOTCH1,SUV420H1,PPM1D,HIST1H1E,FGF13,NR2F1,ACTB,TGFBR2,MTOR,PSEN2,FLNA,HDAC8,KDM5C,TDP2,CDK8,TRIP12,BCKDK,FBXO11,TET3,SOX5,KAT8,DPF2
GO Process	GO:0017145	Stem cell division	3	35	1.51	0.0161	NOTCH1,FGF13,SOX5
GO Process	GO:0009888	Tissue development	14	1760	0.48	0.0172	KDM6B,NOTCH1,SOX2,WT1,COL18A1,ACTB,TGFBR2,LAMC3,MTOR,ACTA1,FLNA,TBR1,SOX5,ACTG1
GO Process	GO:0009987	Cellular process	50	15024	0.1	0.0172	GSS,H3F3B,KDM6B,SRCAP,SETD1A,KYNU,SMARCA2,SMARCC2,NCOR1,NOTCH1,GUSB,TUB,SUV420H1,YWHAG,PPM1D,HIST1H1E,FGF13,SOX2,NR2F1,WT1,MC2R,DCX,POU1F1,COL18A1,RAC1,ACTB,TGFBR2,LAMC3,MTOR,ACTA1,PSEN2,GATAD2B,FLNA,HDAC8,ECE1,KDM5C,TDP2,CLCN4,CDK8,TRIP12,TBR1,BCKDK,ZMYND11,TXNRD2,FBXO11,TET3,SOX5,KAT8,DPF2,ACTG1
GO Process	GO:0002009	Morphogenesis of an epithelium	7	435	0.78	0.0174	NOTCH1,WT1,ACTB,TGFBR2,FLNA,TBR1,ACTG1
GO Process	GO:0032231	Regulation of actin filament bundle assembly	4	100	1.18	0.0179	RAC1,MTOR,FLNA,ACTG1
GO Process	GO:0042060	Wound healing	7	439	0.78	0.0179	H3F3B,RAC1,ACTB,TGFBR2,MTOR,FLNA,ACTG1
GO Process	GO:0048699	Generation of neurons	13	1551	0.5	0.0179	NOTCH1,YWHAG,FGF13,SOX2,NR2F1,DCX,RAC1,ACTB,MTOR,FLNA,TDP2,TBR1,SOX5
GO Process	GO:0060421	Positive regulation of heart growth	3	38	1.47	0.0184	NOTCH1,WT1,MTOR
GO Process	GO:0055059	Asymmetric neuroblast division	2	6	2023-01-02	0.0200	FGF13,SOX5
GO Process	GO:1902396	Protein localization to bicellular tight junction	2	6	2023-01-02	0.0200	FLNA,ACTG1
GO Process	GO:0051146	Striated muscle cell differentiation	5	200	0.97	0.0213	KDM6B,WT1,MTOR,ACTA1,ACTG1
GO Process	GO:0009887	Animal organ morphogenesis	10	967	0.59	0.0214	NOTCH1,WT1,COL18A1,TGFBR2,LAMC3,MTOR,ACTA1,TBR1,SOX5,MEIS2
GO Process	GO:0035051	Cardiocyte differentiation	4	109	1.14	0.0231	KDM6B,NOTCH1,WT1,MTOR
GO Process	GO:0070527	Platelet aggregation	3	42	1.43	0.0231	ACTB,FLNA,ACTG1
GO Process	GO:0043170	Macromolecule metabolic process	29	6137	0.25	0.0235	H3F3B,KDM6B,SRCAP,SETD1A,NOTCH1,GUSB,SUV420H1,PPM1D,HIST1H1E,FGF13,NR2F1,WT1,ACTB,TGFBR2,MTOR,PSEN2,FLNA,HDAC8,ECE1,KDM5C,TDP2,CDK8,TRIP12,BCKDK,FBXO11,TET3,SOX5,KAT8,DPF2
GO Process	GO:0019538	Protein metabolic process	23	4251	0.31	0.0245	H3F3B,KDM6B,SRCAP,SETD1A,SUV420H1,PPM1D,HIST1H1E,FGF13,ACTB,TGFBR2,MTOR,PSEN2,FLNA,HDAC8,ECE1,KDM5C,CDK8,TRIP12,BCKDK,FBXO11,TET3,KAT8,DPF2
GO Process	GO:0006807	Nitrogen compound metabolic process	31	6852	0.23	0.0255	GSS,H3F3B,KDM6B,SRCAP,SETD1A,KYNU,NOTCH1,GUSB,SUV420H1,PPM1D,HIST1H1E,FGF13,NR2F1,WT1,ACTB,TGFBR2,MTOR,PSEN2,FLNA,HDAC8,ECE1,KDM5C,TDP2,CDK8,TRIP12,BCKDK,FBXO11,TET3,SOX5,KAT8,DPF2
GO Process	GO:0048638	Regulation of developmental growth	6	333	0.83	0.0258	NOTCH1,FGF13,WT1,POU1F1,TGFBR2,MTOR
GO Process	GO:0062043	Positive regulation of cardiac epithelial to mesenchymal transition	2	8	1.97	0.0296	NOTCH1,TGFBR2
GO Process	GO:1901533	Negative regulation of hematopoietic progenitor cell differentiation	2	8	1.97	0.0296	NOTCH1,DPF2
GO Process	GO:0001894	Tissue homeostasis	5	219	0.93	0.0297	NOTCH1,TUB,RAC1,ACTB,ACTG1
GO Process	GO:0010718	Positive regulation of epithelial to mesenchymal transition	3	47	1.38	0.0297	NOTCH1,TGFBR2,MTOR
GO Process	GO:1901564	Organonitrogen compound metabolic process	26	5244	0.27	0.0297	GSS,H3F3B,KDM6B,SRCAP,SETD1A,KYNU,GUSB,SUV420H1,PPM1D,HIST1H1E,FGF13,ACTB,TGFBR2,MTOR,PSEN2,FLNA,HDAC8,ECE1,KDM5C,CDK8,TRIP12,BCKDK,FBXO11,TET3,KAT8,DPF2
GO Process	GO:1903706	Regulation of hemopoiesis	7	493	0.73	0.0309	H3F3B,SETD1A,NOTCH1,TGFBR2,MTOR,DPF2,MEIS2
GO Process	GO:0051128	Regulation of cellular component organization	16	2402	0.4	0.0327	H3F3B,SETD1A,SMARCA2,NOTCH1,YWHAG,HIST1H1E,FGF13,NR2F1,WT1,RAC1,MTOR,FLNA,HDAC8,TRIP12,TBR1,ACTG1
GO Process	GO:0072132	Mesenchyme morphogenesis	3	49	1.36	0.0327	NOTCH1,TGFBR2,ACTA1
GO Process	GO:0006950	Response to stress	20	3485	0.33	0.0333	GSS,H3F3B,KDM6B,KYNU,NOTCH1,SUV420H1,PPM1D,SOX2,COL18A1,RAC1,ACTB,TGFBR2,MTOR,PSEN2,FLNA,TDP2,TRIP12,ZMYND11,TXNRD2,ACTG1
GO Process	GO:0040008	Regulation of growth	8	676	0.65	0.0362	H3F3B,SMARCA2,NOTCH1,FGF13,WT1,POU1F1,TGFBR2,MTOR
GO Process	GO:0003179	Heart valve morphogenesis	3	52	1.34	0.0370	NOTCH1,TGFBR2,MTOR
GO Process	GO:0072359	Circulatory system development	9	872	0.59	0.0403	KDM6B,NOTCH1,WT1,COL18A1,TGFBR2,MTOR,ECE1,TBR1,ACTG1
GO Process	GO:0007507	Heart development	7	522	0.7	0.0404	KDM6B,NOTCH1,WT1,TGFBR2,MTOR,ECE1,TBR1
GO Process	GO:0030335	Positive regulation of cell migration	7	522	0.7	0.0404	NOTCH1,COL18A1,RAC1,TGFBR2,MTOR,FLNA,ACTG1
GO Process	GO:0008285	Negative regulation of cell population proliferation	8	696	0.64	0.0421	SMARCA2,NOTCH1,PPM1D,SOX2,WT1,POU1F1,COL18A1,TGFBR2
GO Process	GO:0048646	Anatomical structure formation involved in morphogenesis	9	883	0.58	0.0429	KDM6B,NOTCH1,SOX2,WT1,COL18A1,TGFBR2,ACTA1,TBR1,ACTG1
GO Process	GO:0045926	Negative regulation of growth	5	247	0.88	0.0451	SMARCA2,NOTCH1,FGF13,WT1,TGFBR2
GO Process	GO:0033043	Regulation of organelle organization	11	1306	0.5	0.0468	H3F3B,SETD1A,YWHAG,HIST1H1E,FGF13,RAC1,MTOR,FLNA,HDAC8,TRIP12,ACTG1
GO Molecular Function
GO Function	GO:0097159	Organic cyclic compound binding	37	5916	0.37	3.21e-06	GSS,H3F3B,KDM6B,SRCAP,SETD1A,KYNU,SMARCA2,SMARCC2,NCOR1,NOTCH1,SETBP1,YWHAG,HIST1H1E,SOX2,NR2F1,WT1,POU1F1,RAC1,ACTB,TGFBR2,MTOR,ACTA1,GATAD2B,FLNA,KDM5C,TDP2,CLCN4,CDK8,TBR1,BCKDK,ZMYND11,TXNRD2,TET3,SOX5,DPF2,MEIS2,ACTG1
GO Function	GO:1901363	Heterocyclic compound binding	37	5831	0.38	3.21e-06	GSS,H3F3B,KDM6B,SRCAP,SETD1A,KYNU,SMARCA2,SMARCC2,NCOR1,NOTCH1,SETBP1,YWHAG,HIST1H1E,SOX2,NR2F1,WT1,POU1F1,RAC1,ACTB,TGFBR2,MTOR,ACTA1,GATAD2B,FLNA,KDM5C,TDP2,CLCN4,CDK8,TBR1,BCKDK,ZMYND11,TXNRD2,TET3,SOX5,DPF2,MEIS2,ACTG1
GO Function	GO:0003677	DNA binding	23	2470	0.54	2.09e-05	H3F3B,KDM6B,SRCAP,SMARCA2,SMARCC2,NCOR1,NOTCH1,SETBP1,HIST1H1E,SOX2,NR2F1,WT1,POU1F1,MTOR,GATAD2B,KDM5C,TDP2,TBR1,ZMYND11,TET3,SOX5,DPF2,MEIS2
GO Function	GO:0003690	Double-stranded dna binding	16	1156	0.72	2.58e-05	H3F3B,KDM6B,SMARCA2,NCOR1,NOTCH1,HIST1H1E,SOX2,NR2F1,WT1,POU1F1,MTOR,TBR1,ZMYND11,SOX5,DPF2,MEIS2
GO Function	GO:0043565	Sequence-specific dna binding	16	1331	0.66	0.00014	H3F3B,KDM6B,SMARCA2,NCOR1,NOTCH1,SOX2,NR2F1,WT1,POU1F1,MTOR,GATAD2B,TBR1,TET3,SOX5,DPF2,MEIS2
GO Function	GO:0000976	Transcription regulatory region sequence-specific dna binding	14	1028	0.71	0.00019	H3F3B,KDM6B,SMARCA2,NCOR1,NOTCH1,SOX2,NR2F1,WT1,POU1F1,MTOR,TBR1,SOX5,DPF2,MEIS2
GO Function	GO:0005488	Binding	49	12516	0.17	0.00019	GSS,H3F3B,KDM6B,SRCAP,SETD1A,KYNU,SMARCA2,SMARCC2,NCOR1,NOTCH1,SETBP1,GUSB,TUB,SUV420H1,YWHAG,PPM1D,HIST1H1E,FGF13,SOX2,NR2F1,WT1,DCX,POU1F1,COL18A1,RAC1,ACTB,TGFBR2,MTOR,ACTA1,GATAD2B,FLNA,HDAC8,ECE1,KDM5C,TDP2,CLCN4,CDK8,TRIP12,TBR1,BCKDK,ZMYND11,TXNRD2,FBXO11,TET3,SOX5,KAT8,DPF2,MEIS2,ACTG1
GO Function	GO:0008134	Transcription factor binding	11	672	0.79	0.00045	SETD1A,NCOR1,POU1F1,ACTB,MTOR,FLNA,HDAC8,TRIP12,TBR1,KAT8,MEIS2
GO Function	GO:0003676	Nucleic acid binding	26	3947	0.39	0.00048	H3F3B,KDM6B,SRCAP,SETD1A,SMARCA2,SMARCC2,NCOR1,NOTCH1,SETBP1,YWHAG,HIST1H1E,SOX2,NR2F1,WT1,POU1F1,MTOR,GATAD2B,FLNA,KDM5C,TDP2,TBR1,ZMYND11,TET3,SOX5,DPF2,MEIS2
GO Function	GO:0043167	Ion binding	32	6188	0.29	0.0024	GSS,KDM6B,SRCAP,KYNU,SMARCA2,NOTCH1,SUV420H1,PPM1D,HIST1H1E,NR2F1,WT1,COL18A1,RAC1,ACTB,TGFBR2,MTOR,ACTA1,GATAD2B,HDAC8,ECE1,KDM5C,TDP2,CLCN4,CDK8,BCKDK,ZMYND11,TXNRD2,FBXO11,TET3,KAT8,DPF2,ACTG1
GO Function	GO:0005515	Protein binding	34	7026	0.26	0.0038	GSS,H3F3B,KDM6B,SRCAP,SETD1A,KYNU,SMARCA2,SMARCC2,NCOR1,NOTCH1,GUSB,TUB,YWHAG,PPM1D,FGF13,WT1,DCX,POU1F1,COL18A1,RAC1,ACTB,TGFBR2,MTOR,ACTA1,FLNA,HDAC8,ECE1,TRIP12,TBR1,ZMYND11,KAT8,DPF2,MEIS2,ACTG1
GO Function	GO:0003712	Transcription coregulator activity	9	571	0.77	0.0043	SRCAP,SMARCA2,SMARCC2,NCOR1,NR2F1,TDP2,ZMYND11,DPF2,MEIS2
GO Function	GO:0140110	Transcription regulator activity	15	1657	0.53	0.0043	SRCAP,SMARCA2,SMARCC2,NCOR1,NOTCH1,SOX2,NR2F1,WT1,POU1F1,TDP2,TBR1,ZMYND11,SOX5,DPF2,MEIS2
GO Function	GO:0042393	Histone binding	6	221	2023-01-01	0.0059	SRCAP,SMARCA2,SMARCC2,ZMYND11,KAT8,DPF2
GO Function	GO:0031490	Chromatin dna binding	4	79	1.28	0.0132	H3F3B,KDM6B,NOTCH1,HIST1H1E
GO Function	GO:0000987	Cis-regulatory region sequence-specific dna binding	9	701	0.68	0.0166	H3F3B,KDM6B,NOTCH1,NR2F1,POU1F1,MTOR,TBR1,DPF2,MEIS2
GO Function	GO:0004402	Histone acetyltransferase activity	3	32	1.55	0.0184	SRCAP,KAT8,DPF2
GO Function	GO:0003682	Chromatin binding	8	570	0.72	0.0207	H3F3B,KDM6B,SMARCA2,NCOR1,NOTCH1,SUV420H1,HIST1H1E,POU1F1
GO Function	GO:0019900	Kinase binding	9	742	0.66	0.0208	YWHAG,PPM1D,DCX,RAC1,ACTB,TGFBR2,MTOR,FLNA,TBR1
GO Function	GO:0098973	Structural constituent of postsynaptic actin cytoskeleton	2	5	2.18	0.0208	ACTB,ACTG1
GO Function	GO:0000166	Nucleotide binding	15	2119	0.43	0.0390	GSS,SRCAP,SMARCA2,HIST1H1E,RAC1,ACTB,TGFBR2,MTOR,ACTA1,CLCN4,CDK8,BCKDK,TXNRD2,TET3,ACTG1
GO Function	GO:0019901	Protein kinase binding	8	653	0.66	0.0390	YWHAG,PPM1D,DCX,RAC1,ACTB,TGFBR2,MTOR,TBR1
GO Function	GO:0000978	RNA polymerase II cis-regulatory region sequence-specific DNA binding	8	672	0.65	0.0444	H3F3B,KDM6B,NOTCH1,NR2F1,POU1F1,TBR1,DPF2,MEIS2
GO Function	GO:0005524	ATP binding	12	1464	0.49	0.0444	GSS,SRCAP,SMARCA2,HIST1H1E,ACTB,TGFBR2,MTOR,ACTA1,CLCN4,CDK8,BCKDK,ACTG1
GO Function	GO:0001102	RNA polymerase II activating transcription factor binding	3	53	1.33	0.0476	NCOR1,POU1F1,TBR1
GO Cellular Component
GO Component	GO:0005694	Chromosome	23	1712	0.7	2.47e-08	H3F3B,KDM6B,SRCAP,SETD1A,SMARCA2,SMARCC2,NCOR1,SUV420H1,HIST1H1E,SOX2,POU1F1,ACTB,PSEN2,GATAD2B,FLNA,HDAC8,ZMYND11,FBXO11,TET3,SOX5,KAT8,DPF2,MEIS2
GO Component	GO:0000228	Nuclear chromosome	18	1256	0.73	9.67e-07	H3F3B,KDM6B,SRCAP,SETD1A,SMARCA2,SMARCC2,NCOR1,SUV420H1,HIST1H1E,SOX2,POU1F1,ACTB,GATAD2B,HDAC8,SOX5,KAT8,DPF2,MEIS2
GO Component	GO:0031981	Nuclear lumen	33	4733	0.42	9.67e-07	H3F3B,KDM6B,SRCAP,SETD1A,KYNU,SMARCA2,SMARCC2,NCOR1,NOTCH1,SETBP1,SUV420H1,PPM1D,HIST1H1E,FGF13,SOX2,NR2F1,WT1,POU1F1,ACTB,MTOR,GATAD2B,FLNA,HDAC8,KDM5C,TDP2,CDK8,TRIP12,ZMYND11,FBXO11,SOX5,KAT8,DPF2,MEIS2
GO Component	GO:0070013	Intracellular organelle lumen	37	5857	0.38	9.67e-07	H3F3B,KDM6B,SRCAP,SETD1A,KYNU,SMARCA2,SMARCC2,NCOR1,NOTCH1,SETBP1,GUSB,SUV420H1,PPM1D,HIST1H1E,FGF13,SOX2,NR2F1,WT1,POU1F1,COL18A1,ACTB,MTOR,GATAD2B,FLNA,HDAC8,KDM5C,TDP2,CDK8,TRIP12,BCKDK,ZMYND11,TXNRD2,FBXO11,SOX5,KAT8,DPF2,MEIS2
GO Component	GO:0000790	Nuclear chromatin	16	1048	0.76	1.98e-06	H3F3B,KDM6B,SRCAP,SETD1A,SMARCA2,SMARCC2,NCOR1,HIST1H1E,SOX2,POU1F1,ACTB,GATAD2B,SOX5,KAT8,DPF2,MEIS2
GO Component	GO:0043232	Intracellular non-membrane-bounded organelle	31	4880	0.38	2.35e-05	H3F3B,KDM6B,SRCAP,SETD1A,SMARCA2,SMARCC2,NCOR1,SUV420H1,HIST1H1E,FGF13,SOX2,WT1,DCX,POU1F1,RAC1,ACTB,ACTA1,PSEN2,GATAD2B,FLNA,HDAC8,TDP2,CDK8,ZMYND11,FBXO11,TET3,SOX5,KAT8,DPF2,MEIS2,ACTG1
GO Component	GO:0043231	Intracellular membrane-bounded organelle	46	10761	0.21	3.62e-05	H3F3B,KDM6B,SRCAP,SETD1A,KYNU,SMARCA2,SMARCC2,NCOR1,NOTCH1,SETBP1,GUSB,TUB,SUV420H1,YWHAG,PPM1D,HIST1H1E,FGF13,SOX2,NR2F1,WT1,POU1F1,COL18A1,RAC1,ACTB,MTOR,PSEN2,GATAD2B,FLNA,HDAC8,ECE1,KDM5C,TDP2,CLCN4,CDK8,TRIP12,TBR1,BCKDK,ZMYND11,TXNRD2,FBXO11,TET3,SOX5,KAT8,DPF2,MEIS2,ACTG1
GO Component	GO:0005634	Nucleus	38	7390	0.29	3.69e-05	H3F3B,KDM6B,SRCAP,SETD1A,KYNU,SMARCA2,SMARCC2,NCOR1,NOTCH1,SETBP1,TUB,SUV420H1,PPM1D,HIST1H1E,FGF13,SOX2,NR2F1,WT1,POU1F1,ACTB,MTOR,PSEN2,GATAD2B,FLNA,HDAC8,KDM5C,TDP2,CDK8,TRIP12,TBR1,ZMYND11,FBXO11,TET3,SOX5,KAT8,DPF2,MEIS2,ACTG1
GO Component	GO:0005654	Nucleoplasm	27	3973	0.41	5.83e-05	H3F3B,KDM6B,SRCAP,SETD1A,KYNU,SMARCA2,SMARCC2,NCOR1,NOTCH1,SETBP1,SUV420H1,PPM1D,SOX2,NR2F1,WT1,ACTB,MTOR,GATAD2B,HDAC8,KDM5C,TDP2,CDK8,TRIP12,ZMYND11,FBXO11,KAT8,DPF2
GO Component	GO:0005622	Intracellular	51	14276	0.13	0.00019	GSS,H3F3B,KDM6B,SRCAP,SETD1A,KYNU,SMARCA2,SMARCC2,NCOR1,NOTCH1,SETBP1,GUSB,TUB,SUV420H1,YWHAG,PPM1D,HIST1H1E,FGF13,SOX2,NR2F1,WT1,MC2R,DCX,POU1F1,COL18A1,RAC1,ACTB,TGFBR2,MTOR,ACTA1,PSEN2,GATAD2B,FLNA,HDAC8,ECE1,KDM5C,TDP2,CLCN4,CDK8,TRIP12,TBR1,BCKDK,ZMYND11,TXNRD2,FBXO11,TET3,SOX5,KAT8,DPF2,MEIS2,ACTG1
GO Component	GO:0043227	Membrane-bounded organelle	48	12427	0.16	0.00022	GSS,H3F3B,KDM6B,SRCAP,SETD1A,KYNU,SMARCA2,SMARCC2,NCOR1,NOTCH1,SETBP1,GUSB,TUB,SUV420H1,YWHAG,PPM1D,HIST1H1E,FGF13,SOX2,NR2F1,WT1,POU1F1,COL18A1,RAC1,ACTB,MTOR,ACTA1,PSEN2,GATAD2B,FLNA,HDAC8,ECE1,KDM5C,TDP2,CLCN4,CDK8,TRIP12,TBR1,BCKDK,ZMYND11,TXNRD2,FBXO11,TET3,SOX5,KAT8,DPF2,MEIS2,ACTG1
GO Component	GO:0043229	Intracellular organelle	48	12528	0.16	0.00028	H3F3B,KDM6B,SRCAP,SETD1A,KYNU,SMARCA2,SMARCC2,NCOR1,NOTCH1,SETBP1,GUSB,TUB,SUV420H1,YWHAG,PPM1D,HIST1H1E,FGF13,SOX2,NR2F1,WT1,DCX,POU1F1,COL18A1,RAC1,ACTB,MTOR,ACTA1,PSEN2,GATAD2B,FLNA,HDAC8,ECE1,KDM5C,TDP2,CLCN4,CDK8,TRIP12,TBR1,BCKDK,ZMYND11,TXNRD2,FBXO11,TET3,SOX5,KAT8,DPF2,MEIS2,ACTG1
GO Component	GO:0070603	SWI/SNF superfamily-type complex	5	78	1.38	0.00028	SRCAP,SMARCA2,SMARCC2,GATAD2B,DPF2
GO Component	GO:1902494	Catalytic complex	14	1328	0.6	0.00062	KDM6B,SRCAP,SETD1A,SMARCA2,SMARCC2,NCOR1,ACTB,GATAD2B,HDAC8,KDM5C,BCKDK,FBXO11,KAT8,DPF2
GO Component	GO:0043226	Organelle	49	13515	0.13	0.00087	GSS,H3F3B,KDM6B,SRCAP,SETD1A,KYNU,SMARCA2,SMARCC2,NCOR1,NOTCH1,SETBP1,GUSB,TUB,SUV420H1,YWHAG,PPM1D,HIST1H1E,FGF13,SOX2,NR2F1,WT1,DCX,POU1F1,COL18A1,RAC1,ACTB,MTOR,ACTA1,PSEN2,GATAD2B,FLNA,HDAC8,ECE1,KDM5C,TDP2,CLCN4,CDK8,TRIP12,TBR1,BCKDK,ZMYND11,TXNRD2,FBXO11,TET3,SOX5,KAT8,DPF2,MEIS2,ACTG1
GO Component	GO:0071565	nBAF complex	3	15	1.88	0.0011	SMARCA2,SMARCC2,DPF2
GO Component	GO:0000118	Histone deacetylase complex	4	65	1.36	0.0026	SRCAP,NCOR1,GATAD2B,HDAC8
GO Component	GO:0035097	Histone methyltransferase complex	4	74	1.31	0.0040	KDM6B,SETD1A,KDM5C,KAT8
GO Component	GO:0005884	Actin filament	4	101	1.17	0.0122	ACTB,ACTA1,FLNA,ACTG1
GO Component	GO:0032991	Protein-containing complex	26	5073	0.29	0.0122	H3F3B,KDM6B,SRCAP,SETD1A,SMARCA2,SMARCC2,NCOR1,NOTCH1,HIST1H1E,SOX2,DCX,COL18A1,ACTB,TGFBR2,MTOR,PSEN2,GATAD2B,FLNA,HDAC8,KDM5C,CDK8,BCKDK,FBXO11,KAT8,DPF2,ACTG1
GO Component	GO:0097433	Dense body	2	6	2023-01-02	0.0122	ACTB,ACTG1
GO Component	GO:0071564	npBAF complex	2	12	2023-08-01	0.0373	SMARCA2,SMARCC2
GO Component	GO:0005829	Cytosol	25	5193	0.26	0.0427	GSS,KYNU,NCOR1,NOTCH1,SETBP1,TUB,YWHAG,PPM1D,FGF13,SOX2,NR2F1,WT1,DCX,RAC1,ACTB,TGFBR2,MTOR,ACTA1,FLNA,KDM5C,TRIP12,TXNRD2,FBXO11,DPF2,ACTG1
Reactome								GO Cellular Component								GO Cellular Component
Reactome	HSA-3247509	Chromatin modifying enzymes	11	237	1.24	8.77e-08	KDM6B,SETD1A,SMARCA2,SMARCC2,NCOR1,SUV420H1,ACTB,GATAD2B,HDAC8,KDM5C,KAT8
Reactome	HSA-5663202	Diseases of signal transduction by growth factor receptors and second messengers	10	392	0.98	6.21e-05	NCOR1,NOTCH1,RAC1,ACTB,TGFBR2,MTOR,PSEN2,HDAC8,CDK8,ACTG1
Reactome	HSA-2644606	Constitutive Signaling by NOTCH1 PEST Domain Mutants	5	58	1.51	0.00036	NCOR1,NOTCH1,PSEN2,HDAC8,CDK8
Reactome	HSA-2894862	Constitutive Signaling by NOTCH1 HD+PEST Domain Mutants	5	58	1.51	0.00036	NCOR1,NOTCH1,PSEN2,HDAC8,CDK8
Reactome	HSA-74160	Gene expression (Transcription)	16	1455	0.62	0.00036	H3F3B,SETD1A,SMARCA2,SMARCC2,NCOR1,NOTCH1,YWHAG,PPM1D,SOX2,NR2F1,ACTB,MTOR,GATAD2B,HDAC8,CDK8,TET3
Reactome	HSA-1980143	Signaling by NOTCH1	5	74	1.41	0.00045	NCOR1,NOTCH1,PSEN2,HDAC8,CDK8
Reactome	HSA-212436	Generic Transcription Pathway	14	1197	0.64	0.00045	H3F3B,SETD1A,SMARCA2,SMARCC2,NCOR1,NOTCH1,YWHAG,PPM1D,SOX2,NR2F1,MTOR,GATAD2B,HDAC8,CDK8
Reactome	HSA-2122947	NOTCH1 Intracellular Domain Regulates Transcription	4	48	2023-05-01	0.0018	NCOR1,NOTCH1,HDAC8,CDK8
Reactome	HSA-3928665	EPH-ephrin mediated repulsion of cells	4	51	1.47	0.0021	RAC1,ACTB,PSEN2,ACTG1
Reactome	HSA-157118	Signaling by NOTCH	6	202	2023-05-01	0.0026	H3F3B,NCOR1,NOTCH1,PSEN2,HDAC8,CDK8
Reactome	HSA-446353	Cell-extracellular matrix interactions	3	18	2023-08-01	0.0031	ACTB,FLNA,ACTG1
Reactome	HSA-1643685	Disease	14	1548	0.53	0.0049	GSS,NCOR1,NOTCH1,GUSB,MC2R,RAC1,ACTB,TGFBR2,MTOR,PSEN2,GATAD2B,HDAC8,CDK8,ACTG1
Reactome	HSA-1445148	Translocation of SLC2A4 (GLUT4) to the plasma membrane	4	70	1.33	0.0053	YWHAG,RAC1,ACTB,ACTG1
Reactome	HSA-350054	Notch-HLH transcription pathway	3	28	1.61	0.0086	NCOR1,NOTCH1,HDAC8
Reactome	HSA-5626467	RHO GTPases activate IQGAPs	3	30	1.58	0.0098	RAC1,ACTB,ACTG1
Reactome	HSA-1266738	Developmental Biology	11	1087	0.58	0.0120	H3F3B,NCOR1,NOTCH1,SOX2,WT1,DCX,RAC1,ACTB,PSEN2,CDK8,ACTG1
Reactome	HSA-195258	RHO GTPase Effectors	6	289	0.89	0.0120	H3F3B,YWHAG,RAC1,ACTB,FLNA,ACTG1
Reactome	HSA-162582	Signal Transduction	18	2741	0.39	0.0134	H3F3B,NCOR1,NOTCH1,YWHAG,SOX2,MC2R,RAC1,ACTB,TGFBR2,LAMC3,MTOR,PSEN2,GATAD2B,FLNA,HDAC8,ECE1,CDK8,ACTG1
Reactome	HSA-4420097	VEGFA-VEGFR2 Pathway	4	97	1.19	0.0134	RAC1,ACTB,MTOR,ACTG1
Reactome	HSA-5663213	RHO GTPases Activate WASPs and WAVEs	3	36	2023-05-01	0.0134	RAC1,ACTB,ACTG1
Reactome	HSA-3928662	EPHB-mediated forward signaling	3	42	1.43	0.0179	RAC1,ACTB,ACTG1
Reactome	HSA-212165	Epigenetic regulation of gene expression	4	116	2023-11-01	0.0215	H3F3B,ACTB,GATAD2B,TET3
Reactome	HSA-373760	L1CAM interactions	4	119	2023-01-01	0.0229	DCX,RAC1,ACTB,ACTG1
Reactome	HSA-9006934	Signaling by Receptor Tyrosine Kinases	7	502	0.72	0.0259	NCOR1,RAC1,ACTB,LAMC3,MTOR,PSEN2,ACTG1
Reactome	HSA-196025	Formation of annular gap junctions	2	11	1.84	0.0358	ACTB,ACTG1
Reactome	HSA-2029482	Regulation of actin dynamics for phagocytic cup formation	3	62	1.26	0.0404	RAC1,ACTB,ACTG1
Reactome	HSA-3214815	HDACs deacetylate histones	3	60	1.27	0.0404	NCOR1,GATAD2B,HDAC8
Reactome	HSA-5625740	RHO GTPases activate PKNs	3	63	1.25	0.0404	H3F3B,YWHAG,RAC1
Reactome	HSA-9664422	FCGR3A-mediated phagocytosis	3	60	1.27	0.0404	RAC1,ACTB,ACTG1

## Sheet: Enrichment subnetwork2 dsld kme
#category	term ID	term description	observed gene count	background gene count	strength	false discovery rate	matching proteins in your network (labels)
GO Biological Process
GO Process	GO:0007601	Visual perception	7	220	1.59	3.45e-06	PDE6A,CLRN1,FSCN2,RORB,FAM161A,NRL,RBP3
GO Process	GO:0007600	Sensory perception	9	923	2023-08-01	4.37e-05	PDE6A,CACNA1D,CLRN1,FSCN2,RORB,FAM161A,NRL,RBP3,GNB1
GO Process	GO:0044782	Cilium organization	6	360	1.31	0.00087	CEP135,POC1A,CEP63,PCNT,LCA5,FAM161A
GO Process	GO:0007423	Sensory organ development	6	563	2023-12-01	0.0073	PDE6A,CLRN1,FSCN2,RORB,NRL,GNB1
GO Process	GO:0042462	Eye photoreceptor cell development	3	34	2023-03-02	0.0073	FSCN2,RORB,NRL
GO Process	GO:0007051	Spindle organization	4	145	1.53	0.0081	POC1A,CEP63,PCNT,TUBGCP2
GO Process	GO:0060041	Retina development in camera-type eye	4	142	1.54	0.0081	PDE6A,RORB,NRL,GNB1
GO Process	GO:0060271	Cilium assembly	5	339	1.26	0.0081	CEP135,POC1A,CEP63,PCNT,FAM161A
GO Process	GO:0001654	Eye development	5	365	1.22	0.0086	PDE6A,FSCN2,RORB,NRL,GNB1
GO Process	GO:0007010	Cytoskeleton organization	7	1126	0.88	0.0113	CEP135,POC1A,CLRN1,FSCN2,CEP63,PCNT,TUBGCP2
GO Process	GO:0007017	Microtubule-based process	6	727	1.0	0.0113	CEP135,POC1A,CEP63,PCNT,LCA5,TUBGCP2
GO Process	GO:0070925	Organelle assembly	6	735	1.0	0.0113	CEP135,POC1A,CEP63,PCNT,FAM161A,TUBGCP2
GO Process	GO:0120036	Plasma membrane bounded cell projection organization	7	1122	0.88	0.0113	CEP135,POC1A,CLRN1,CEP63,PCNT,LCA5,FAM161A
GO Process	GO:0046548	Retinal rod cell development	2	8	2.49	0.0144	RORB,NRL
GO Process	GO:0000226	Microtubule cytoskeleton organization	5	492	2023-09-01	0.0177	CEP135,POC1A,CEP63,PCNT,TUBGCP2
GO Process	GO:0016056	Rhodopsin mediated signaling pathway	2	12	2.31	0.0252	PDE6A,GNB1
GO Process	GO:0090596	Sensory organ morphogenesis	4	264	1.27	0.0252	CLRN1,FSCN2,RORB,NRL
GO Process	GO:0097711	Ciliary basal body-plasma membrane docking	3	95	1.59	0.0278	CEP135,CEP63,PCNT
GO Process	GO:0007099	Centriole replication	2	18	2.13	0.0473	CEP135,CEP63
GO Cellular Component
GO Component	GO:0000922	Spindle pole	4	161	1.48	0.0020	POC1A,CEP63,FAM161A,TUBGCP2
GO Component	GO:0005813	Centrosome	6	565	2023-11-01	0.0020	CEP135,POC1A,CEP63,PCNT,FAM161A,TUBGCP2
GO Component	GO:0005814	Centriole	4	142	1.54	0.0020	CEP135,POC1A,CEP63,PCNT
GO Component	GO:0005815	Microtubule organizing center	7	761	2023-05-01	0.0020	CEP135,POC1A,CEP63,PCNT,LCA5,FAM161A,TUBGCP2
GO Component	GO:0015630	Microtubule cytoskeleton	8	1219	0.9	0.0020	CEP135,POC1A,CLRN1,CEP63,PCNT,LCA5,FAM161A,TUBGCP2
GO Component	GO:0097733	Photoreceptor cell cilium	4	115	1.63	0.0020	PDE6A,LCA5,FAM161A,GNB1
GO Component	GO:0005856	Cytoskeleton	9	2221	0.7	0.0032	CEP135,POC1A,CLRN1,FSCN2,CEP63,PCNT,LCA5,FAM161A,TUBGCP2
GO Component	GO:0043232	Intracellular non-membrane-bounded organelle	12	4880	0.48	0.0064	CEP135,CACNA1D,POC1A,CLRN1,FSCN2,CEP63,PCNT,RORB,LCA5,FAM161A,TUBGCP2,NRL
GO Component	GO:0005929	Cilium	5	637	0.98	0.0171	PDE6A,POC1A,LCA5,FAM161A,GNB1
GO Component	GO:0036064	Ciliary basal body	3	134	1.44	0.0217	POC1A,LCA5,FAM161A
GO Component	GO:0097381	Photoreceptor disc membrane	2	24	2023-01-02	0.0228	PDE6A,GNB1
GO Component	GO:0005874	Microtubule	4	407	2023-08-01	0.0303	CLRN1,PCNT,FAM161A,TUBGCP2
GO Component	GO:0005834	Heterotrimeric g-protein complex	2	33	1.87	0.0366	GNB5,GNB1
GO Component	GO:0032391	Photoreceptor connecting cilium	2	38	1.81	0.0429	LCA5,FAM161A
GO Component	GO:0043005	Neuron projection	6	1366	0.73	0.0432	PDE6A,CLRN1,FSCN2,LCA5,FAM161A,GNB1
Reactome
Reactome	HSA-2187338	Visual phototransduction	4	99	1.69	0.0012	PDE6A,GNB5,RBP3,GNB1
Reactome	HSA-2514859	Inactivation, recovery and regulation of the phototransduction cascade	3	33	2023-05-02	0.0012	PDE6A,GNB5,GNB1
Reactome	HSA-380270	Recruitment of mitotic centrosome proteins and complexes	4	80	1.79	0.0012	CEP135,CEP63,PCNT,TUBGCP2
Reactome	HSA-380320	Recruitment of NuMA to mitotic centrosomes	4	93	1.72	0.0012	CEP135,CEP63,PCNT,TUBGCP2
Reactome	HSA-400042	Adrenaline,noradrenaline inhibits insulin secretion	3	28	2023-12-02	0.0012	GNB5,CACNA1D,GNB1
Reactome	HSA-4086398	Ca2+ pathway	3	60	1.79	0.0045	PDE6A,GNB5,GNB1
Reactome	HSA-380259	Loss of Nlp from mitotic centrosomes	3	69	1.73	0.0047	CEP135,CEP63,PCNT
Reactome	HSA-8854518	AURKA Activation by TPX2	3	72	1.71	0.0047	CEP135,CEP63,PCNT
Reactome	HSA-2485179	Activation of the phototransduction cascade	2	11	2.35	0.0066	PDE6A,GNB1
Reactome	HSA-2565942	Regulation of PLK1 Activity at G2/M Transition	3	87	1.62	0.0066	CEP135,CEP63,PCNT
Reactome	HSA-5620912	Anchoring of the basal body to the plasma membrane	3	97	1.58	0.0083	CEP135,CEP63,PCNT
Reactome	HSA-8964315	G beta:gamma signalling through BTK	2	18	2.13	0.0128	GNB5,GNB1
Reactome	HSA-392851	Prostacyclin signalling through prostacyclin receptor	2	19	2023-11-02	0.0135	GNB5,GNB1
Reactome	HSA-418217	G beta:gamma signalling through PLC beta	2	20	2023-09-02	0.0141	GNB5,GNB1
Reactome	HSA-8964616	G beta:gamma signalling through CDC42	2	20	2023-09-02	0.0141	GNB5,GNB1
Reactome	HSA-500657	Presynaptic function of Kainate receptors	2	21	2023-07-02	0.0142	GNB5,GNB1
Reactome	HSA-392170	ADP signalling through P2Y purinoceptor 12	2	22	2023-05-02	0.0149	GNB5,GNB1
Reactome	HSA-392451	G beta:gamma signalling through PI3Kgamma	2	25	1.99	0.0168	GNB5,GNB1
Reactome	HSA-418592	ADP signalling through P2Y purinoceptor 1	2	25	1.99	0.0168	GNB5,GNB1
Reactome	HSA-428930	Thromboxane signalling through TP receptor	2	24	2023-01-02	0.0168	GNB5,GNB1
Reactome	HSA-202040	G-protein activation	2	28	1.94	0.0182	GNB5,GNB1
Reactome	HSA-1296041	Activation of G protein gated Potassium channels	2	29	1.93	0.0189	GNB5,GNB1
Reactome	HSA-997272	Inhibition of voltage gated Ca2+ channels via Gbeta/gamma subunits	2	29	1.93	0.0189	GNB5,GNB1
Reactome	HSA-456926	Thrombin signalling through proteinase activated receptors (PARs)	2	32	1.88	0.0203	GNB5,GNB1
Reactome	HSA-420092	Glucagon-type ligand receptors	2	33	1.87	0.0204	GNB5,GNB1
Reactome	HSA-381676	Glucagon-like Peptide-1 (GLP1) regulates insulin secretion	2	42	1.77	0.0293	GNB5,GNB1
Reactome	HSA-432040	Vasopressin regulates renal water homeostasis via Aquaporins	2	43	1.75	0.0293	GNB5,GNB1
Reactome	HSA-6814122	Cooperation of PDCL (PhLP1) and TRiC/CCT in G-protein beta folding	2	42	1.77	0.0293	GNB5,GNB1
Reactome	HSA-418597	G alpha (z) signalling events	2	48	1.71	0.0332	GNB5,GNB1

## Sheet: Enrichment subnetwork3 dsld kme
#category	term ID	term description	observed gene count	background gene count	strength	false discovery rate	matching proteins in your network (labels)
GO Biological Process
GO Process	GO:0071625	Vocalization behavior	3	17	2023-05-02	0.0019	NRXN1,NRXN3,SHANK2
GO Process	GO:0030534	Adult behavior	4	136	1.72	0.0051	GRIN2D,NRXN1,NRXN3,SHANK2
GO Process	GO:0035176	Social behavior	3	49	2023-04-02	0.0123	NRXN1,NRXN3,SHANK2
GO Process	GO:1900449	Regulation of glutamate receptor signaling pathway	3	63	1.93	0.0152	NRXN1,GRIA1,SHANK2
GO Process	GO:0007610	Behavior	5	572	1.19	0.0172	GRIN2D,NRXN1,GRIA1,NRXN3,SHANK2
GO Process	GO:0007611	Learning or memory	4	259	1.44	0.0172	NRXN1,GRIA1,NRXN3,SHANK2
GO Process	GO:0097107	Postsynaptic density assembly	2	6	2.77	0.0172	NRXN1,SHANK2
GO Process	GO:0099601	Regulation of neurotransmitter receptor activity	3	78	1.84	0.0172	NRXN1,GRIA1,SHANK2
GO Process	GO:0007158	Neuron cell-cell adhesion	2	16	2.35	0.0432	NRXN1,NRXN3
GO Process	GO:0060292	Long-term synaptic depression	2	17	2.32	0.0432	GRIA1,SHANK2
GO Process	GO:0007612	Learning	3	145	1.57	0.0467	NRXN1,NRXN3,SHANK2
GO Process	GO:0031644	Regulation of nervous system process	3	144	1.57	0.0467	GRIN2D,NRXN1,SHANK2
GO Process	GO:0042391	Regulation of membrane potential	4	440	1.21	0.0467	GRIN2D,NRXN1,GRIA1,SHANK2
GO Process	GO:0050804	Modulation of chemical synaptic transmission	4	446	2023-02-01	0.0467	GRIN2D,NRXN1,GRIA1,SHANK2
GO Process	GO:0050806	Positive regulation of synaptic transmission	3	147	1.56	0.0467	GRIN2D,NRXN1,SHANK2
GO Molecular Function
GO Function	GO:0097109	Neuroligin family protein binding	2	5	2.85	0.0195	NRXN1,NRXN3
GO Cellular Component
GO Component	GO:0014069	Postsynaptic density	4	344	1.32	0.0354	GRIN2D,CDKL5,GRIA1,SHANK2
GO Component	GO:0098590	Plasma membrane region	6	1219	0.94	0.0354	GRIN2D,AP2S1,CDKL5,NRXN1,GRIA1,SHANK2
GO Component	GO:0030426	Growth cone	3	186	1.46	0.0391	CDKL5,NRXN1,SHANK2
Reactome
Reactome	HSA-6794362	Protein-protein interactions at synapses	5	85	2023-02-02	1.80e-06	GRIN2D,NRXN1,GRIA1,NRXN3,SHANK2
Reactome	HSA-112316	Neuronal System	6	406	1.42	2.62e-05	GRIN2D,AP2S1,NRXN1,GRIA1,NRXN3,SHANK2
Reactome	HSA-6794361	Neurexins and neuroligins	4	55	2023-11-02	2.62e-05	GRIN2D,NRXN1,NRXN3,SHANK2
Reactome	HSA-416993	Trafficking of GluR2-containing AMPA receptors	2	17	2.32	0.0265	AP2S1,GRIA1
Reactome	HSA-438066	Unblocking of NMDA receptors, glutamate binding and activation	2	21	2.23	0.0313	GRIN2D,GRIA1
Reactome	HSA-8849932	Synaptic adhesion-like molecules	2	21	2.23	0.0313	GRIN2D,GRIA1
Reactome	HSA-9620244	Long-term potentiation	2	23	2.19	0.0313	GRIN2D,GRIA1
Reactome	HSA-112314	Neurotransmitter receptors and postsynaptic signal transmission	3	203	1.42	0.0408	GRIN2D,AP2S1,GRIA1
