# Supplementary material for: Developing a cluster-based approach for deciphering complexity in individuals with neurodevelopmental differences
Source: Front Pediatr. 2023 Sep 18;11:1171920. doi: 10.3389/fped.2023.1171920 (PMC10543689; doi:10.3389/fped.2023.1171920)
Supplement: Supplementary file 8 [file Table8.xlsx]

## Sheet: MCL clusters AS kmeans
#clustering method	cluster number	cluster color	gene count	protein name	protein description
MCL	1	Red	11	BMP4	Bone morphogenetic protein 4; Induces cartilage and bone formation. Also act in mesoderm induction, tooth development, limb formation and fracture repair. Acts in concert with PTHLH/PTHRP to stimulate ductal outgrowth during embryonic mammary development and to inhibit hair follicle induction (By similarity); Bone morphogenetic proteins
MCL	1	Red	11	CACNA1B	Voltage-dependent N-type calcium channel subunit alpha-1B; Voltage-sensitive calcium channels (VSCC) mediate the entry of calcium ions into excitable cells and are also involved in a variety of calcium-dependent processes, including muscle contraction, hormone or neurotransmitter release, gene expression, cell motility, cell division and cell death. The isoform alpha-1B gives rise to N-type calci…
MCL	1	Red	11	COL11A2	Collagen alpha-2(XI) chain; May play an important role in fibrillogenesis by controlling lateral growth of collagen II fibrils; Collagens
MCL	1	Red	11	GJA1	Gap junction alpha-1 protein; Gap junction protein that acts as a regulator of bladder capacity. A gap junction consists of a cluster of closely packed pairs of transmembrane channels, the connexons, through which materials of low MW diffuse from one cell to a neighboring cell. May play a critical role in the physiology of hearing by participating in the recycling of potassium to the cochlear end…
MCL	1	Red	11	HBA1	Hemoglobin subunit alpha; Involved in oxygen transport from the lung to the various peripheral tissues; Belongs to the globin family
MCL	1	Red	11	HBA2	Hemoglobin subunit alpha 2; Involved in oxygen transport from the lung to the various peripheral tissues; Hemoglobin subunits
MCL	1	Red	11	INS	Insulin; Insulin decreases blood glucose concentration. It increases cell permeability to monosaccharides, amino acids and fatty acids. It accelerates glycolysis, the pentose phosphate cycle, and glycogen synthesis in liver
MCL	1	Red	11	NKX2-1	Homeobox protein Nkx-2.1; Transcription factor that binds and activates the promoter of thyroid specific genes such as thyroglobulin, thyroperoxidase, and thyrotropin receptor. Crucial in the maintenance of the thyroid differentiation phenotype. May play a role in lung development and surfactant homeostasis. Forms a regulatory loop with GRHL2 that coordinates lung epithelial cell morphogenesis an…
MCL	1	Red	11	SCN4A	Sodium channel protein type 4 subunit alpha; This protein mediates the voltage-dependent sodium ion permeability of excitable membranes. Assuming opened or closed conformations in response to the voltage difference across the membrane, the protein forms a sodium-selective channel through which Na(+) ions may pass in accordance with their electrochemical gradient. This sodium channel may be presen…
MCL	1	Red	11	STAC3	SH3 and cysteine-rich domain-containing protein 3; In skeletal muscles contraction, may play a role in neuromuscular synaptic transmission
MCL	1	Red	11	TH	Tyrosine 3-monooxygenase; Plays an important role in the physiology of adrenergic neurons; Belongs to the biopterin-dependent aromatic amino acid hydroxylase family
MCL	2	Yellow	3	ACAT1	Acetyl-CoA acetyltransferase, mitochondrial; Plays a major role in ketone body metabolism
MCL	2	Yellow	3	COASY	Bifunctional coenzyme A synthase; Bifunctional enzyme that catalyzes the fourth and fifth sequential steps of CoA biosynthetic pathway. The fourth reaction is catalyzed by the phosphopantetheine adenylyltransferase, coded by the coaD domain; the fifth reaction is catalyzed by the dephospho-CoA kinase, coded by the coaE domain. May act as a point of CoA biosynthesis regulation; In the central sect…
MCL	2	Yellow	3	PDHX	Pyruvate dehydrogenase protein X component, mitochondrial; Required for anchoring dihydrolipoamide dehydrogenase (E3) to the dihydrolipoamide transacetylase (E2) core of the pyruvate dehydrogenase complexes of eukaryotes. This specific binding is essential for a functional PDH complex
MCL	3	Green	3	KARS	Lysine--tRNA ligase; Catalyzes the specific attachment of an amino acid to its cognate tRNA in a 2 step reaction: the amino acid (AA) is first activated by ATP to form AA-AMP and then transferred to the acceptor end of the tRNA. When secreted, acts as a signaling molecule that induces immune response through the activation of monocyte/macrophages. Catalyzes the synthesis of the signaling molecule…
MCL	3	Green	3	MARS	Methionine--tRNA ligase, cytoplasmic; Catalyzes the specific attachment of an amino acid to its cognate tRNA in a 2 step reaction: the amino acid (AA) is first activated by ATP to form AA-AMP and then transferred to the acceptor end of the tRNA; Belongs to the class-I aminoacyl-tRNA synthetase family
MCL	3	Green	3	SHMT2	Serine hydroxymethyltransferase, mitochondrial; Contributes to the de novo mitochondrial thymidylate biosynthesis pathway via its role in glycine and tetrahydrofolate metabolism. Thymidylate biosynthesis is required to prevent uracil accumulation in mtDNA. Interconversion of serine and glycine. Associates with mitochondrial DNA. Plays a role in the deubiquitination of target proteins as component…
MCL	4	Cyan	2	RAB11B	Ras-related protein Rab-11B; The small GTPases Rab are key regulators of intracellular membrane trafficking, from the formation of transport vesicles to their fusion with membranes. Rabs cycle between an inactive GDP-bound form and an active GTP-bound form that is able to recruit to membranes different set of downstream effectors directly responsible for vesicle formation, movement, tethering and…
MCL	4	Cyan	2	TRAPPC6B	Trafficking protein particle complex subunit 6B; May play a role in vesicular transport from endoplasmic reticulum to Golgi; Trafficking protein particle complex
MCL	5	Blue	2	CDC42BPB	Serine/threonine-protein kinase MRCK beta; Serine/threonine-protein kinase which is an important downstream effector of CDC42 and plays a role in the regulation of cytoskeleton reorganization and cell migration. Regulates actin cytoskeletal reorganization via phosphorylation of PPP1R12C and MYL9/MLC2. In concert with MYO18A and LURAP1, is involved in modulating lamellar actomyosin retrograde flow…
MCL	5	Blue	2	QRICH1	Glutamine-rich protein 1; Glutamine rich 1

## Sheet: Enrichment subnetwork1 AS kmean
#category	term ID	term description	observed gene count	background gene count	strength	false discovery rate	matching proteins in your network (labels)
GO Biological Process
GO Process	GO:0003008	System process	8	1942	0.86	0.0154	BMP4,GJA1,STAC3,CACNA1B,COL11A2,TH,INS,SCN4A
GO Molecular Function
GO Function	GO:0019825	Oxygen binding	3	36	2.17	0.0039	HBA2,HBA1,TH
GO Cellular Component
GO Component	GO:0005833	Hemoglobin complex	2	12	2.47	0.0379	HBA2,HBA1
GO Component	GO:0031838	Haptoglobin-hemoglobin complex	2	11	2.51	0.0379	HBA2,HBA1
GO Component	GO:0071682	Endocytic vesicle lumen	2	20	2.25	0.0379	HBA2,HBA1

## Sheet: Enrichment subnetwork2 AS kmean
#category	term ID	term description	observed gene count	background gene count	strength	false discovery rate	matching proteins in your network (labels)
GO Biological Process
GO Process	GO:0034030	Ribonucleoside bisphosphate biosynthetic process	3	59	2.52	0.00039	PDHX,ACAT1,COASY
GO Process	GO:0034033	Purine nucleoside bisphosphate biosynthetic process	3	59	2.52	0.00039	PDHX,ACAT1,COASY
GO Process	GO:0009152	Purine ribonucleotide biosynthetic process	3	147	2023-12-02	0.00096	PDHX,ACAT1,COASY
GO Process	GO:0015937	Coenzyme a biosynthetic process	2	10	2023-12-03	0.0011	ACAT1,COASY
GO Process	GO:0006085	acetyl-CoA biosynthetic process	2	14	2.97	0.0018	PDHX,ACAT1
GO Cellular Component
GO Component	GO:0005759	Mitochondrial matrix	3	479	1.61	0.0252	PDHX,ACAT1,COASY

## Sheet: Enrichment subnetwork3 AS kmean
#category	term ID	term description	observed gene count	background gene count	strength	false discovery rate	matching proteins in your network (labels)
GO Biological Process
GO Process	GO:0006520	Cellular amino acid metabolic process	3	278	1.85	0.0376	MARS,KARS,SHMT2
GO Molecular Function
GO Function	GO:0000049	tRNA binding	2	63	2.32	0.0479	MARS,KARS
GO Function	GO:0004812	aminoacyl-tRNA ligase activity	2	42	2.49	0.0479	MARS,KARS
GO Function	GO:0016597	Amino acid binding	2	59	2.34	0.0479	KARS,SHMT2
GO Cellular Component
GO Component	GO:0017101	aminoacyl-tRNA synthetase multienzyme complex	2	11	2023-07-03	0.0021	MARS,KARS
Reactome
Reactome	HSA-379716	Cytosolic tRNA aminoacylation	2	24	2.74	0.0111	MARS,KARS
