# Supplementary material for: Developing a cluster-based approach for deciphering complexity in individuals with neurodevelopmental differences
Source: Front Pediatr. 2023 Sep 18;11:1171920. doi: 10.3389/fped.2023.1171920 (PMC10543689; doi:10.3389/fped.2023.1171920)
Supplement: Supplementary file 9 [file Table9.xlsx]

## Sheet: MCL clusters seizure HAC
#clustering method	cluster number	cluster color	gene count	protein name	protein description
MCL	1	Red	76	ABCC8	ATP-binding cassette sub-family C member 8; Subunit of the beta-cell ATP-sensitive potassium channel (KATP). Regulator of ATP-sensitive K(+) channels and insulin release; ATP binding cassette subfamily C
MCL	1	Red	76	ADNP	Activity-dependent neuroprotector homeobox protein; Potential transcription factor. May mediate some of the neuroprotective peptide VIP-associated effects involving normal growth and cancer proliferation; ZF class homeoboxes and pseudogenes
MCL	1	Red	76	ANK2	Ankyrin-2; In skeletal muscle, required for proper localization of DMD and DCTN4 and for the formation and/or stability of a special subset of microtubules associated with costameres and neuromuscular junctions. Attaches integral membrane proteins to cytoskeletal elements. Also binds to cytoskeletal proteins. Required for coordinate assembly of Na/Ca exchanger, Na/K ATPase and InsP3 receptor at s…
MCL	1	Red	76	ATP1A3	Sodium/potassium-transporting ATPase subunit alpha-3; This is the catalytic component of the active enzyme, which catalyzes the hydrolysis of ATP coupled with the exchange of sodium and potassium ions across the plasma membrane. This action creates the electrochemical gradient of sodium and potassium ions, providing the energy for active transport of various nutrients; Belongs to the cation trans…
MCL	1	Red	76	AUTS2	Autism susceptibility gene 2 protein; Component of a Polycomb group (PcG) multiprotein PRC1- like complex, a complex class required to maintain the transcriptionally repressive state of many genes, including Hox genes, throughout development. PcG PRC1 complex acts via chromatin remodeling and modification of histones; it mediates monoubiquitination of histone H2A 'Lys-119', rendering chromatin he…
MCL	1	Red	76	BRAT1	BRCA1-associated ATM activator 1; Involved in DNA damage response; activates kinases ATM, SMC1A and PRKDC by modulating their phosphorylation status following ionizing radiation (IR) stress. Plays a role in regulating mitochondrial function and cell proliferation. Required for protein stability of MTOR and MTOR-related proteins, and cell cycle progress by growth factors
MCL	1	Red	76	CACNA1A	Voltage-dependent P/Q-type calcium channel subunit alpha-1A; Voltage-sensitive calcium channels (VSCC) mediate the entry of calcium ions into excitable cells and are also involved in a variety of calcium-dependent processes, including muscle contraction, hormone or neurotransmitter release, gene expression, cell motility, cell division and cell death. The isoform alpha-1A gives rise to P and/or Q…
MCL	1	Red	76	CC2D1A	Coiled-coil and C2 domain-containing protein 1A; Transcription factor that binds specifically to the DRE (dual repressor element) and represses HTR1A gene transcription in neuronal cells. The combination of calcium and ATP specifically inactivates the binding with FRE. May play a role in the altered regulation of HTR1A associated with anxiety and major depression. Mediates HDAC-independent repres…
MCL	1	Red	76	CCDC115	Coiled-coil domain-containing protein 115; Accessory component of the proton-transporting vacuolar (V)-ATPase protein pump involved in intracellular iron homeostasis. In aerobic conditions, required for intracellular iron homeostasis, thus triggering the activity of Fe(2+) prolyl hydroxylase (PHD) enzymes, and leading to HIF1A hydroxylation and subsequent proteasomal degradation. Necessary for en…
MCL	1	Red	76	CLCN2	Chloride channel protein 2; Voltage-gated chloride channel. Chloride channels have several functions including the regulation of cell volume; membrane potential stabilization, signal transduction and transepithelial transport; Belongs to the chloride channel (TC 2.A.49) family. ClC-2/CLCN2 subfamily
MCL	1	Red	76	CNTNAP1	Contactin-associated protein 1; Required, with CNTNAP2, for radial and longitudinal organization of myelinated axons. Plays a role in the formation of functional distinct domains critical for saltatory conduction of nerve impulses in myelinated nerve fibers. Demarcates the paranodal region of the axo-glial junction. In association with contactin involved in the signaling between axons and myelina…
MCL	1	Red	76	CNTNAP2	Contactin-associated protein-like 2; Required, with CNTNAP1, for radial and longitudinal organization of myelinated axons. Plays a role in the formation of functional distinct domains critical for saltatory conduction of nerve impulses in myelinated nerve fibers. Demarcates the juxtaparanodal region of the axo-glial junction; Belongs to the neurexin family
MCL	1	Red	76	COG7	Conserved oligomeric Golgi complex subunit 7; Required for normal Golgi function; Components of oligomeric golgi complex
MCL	1	Red	76	DEPDC5	Dep domain containing 5, gator1 subcomplex subunit; GATOR complex protein DEPDC5; As a component of the GATOR1 complex functions as an inhibitor of the amino acid-sensing branch of the TORC1 pathway. The GATOR1 complex strongly increases GTP hydrolysis by RRAGA and RRAGB within RRAGC-containing heterodimers, thereby deactivating RRAGs, releasing mTORC1 from lysosomal surface and inhibiting mTORC1…
MCL	1	Red	76	DLG4	Disks large homolog 4; Interacts with the cytoplasmic tail of NMDA receptor subunits and shaker-type potassium channels. Required for synaptic plasticity associated with NMDA receptor signaling. Overexpression or depletion of DLG4 changes the ratio of excitatory to inhibitory synapses in hippocampal neurons. May reduce the amplitude of ASIC3 acid-evoked currents by retaining the channel intracell…
MCL	1	Red	76	DOCK3	Dedicator of cytokinesis protein 3; Potential guanine nucleotide exchange factor (GEF). GEF proteins activate some small GTPases by exchanging bound GDP for free GTP. Its interaction with presenilin proteins as well as its ability to stimulate Tau/MAPT phosphorylation suggest that it may be involved in Alzheimer disease. Ectopic expression in nerve cells decreases the secretion of amyloid-beta AP…
MCL	1	Red	76	DYRK1A	Dual specificity tyrosine-phosphorylation-regulated kinase 1A; Dual-specificity kinase which possesses both serine/threonine and tyrosine kinase activities. May play a role in a signaling pathway regulating nuclear functions of cell proliferation. Modulates alternative splicing by phosphorylating the splice factor SRSF6 (By similarity). Exhibits a substrate preference for proline at position P+1 …
MCL	1	Red	76	FGF13	Fibroblast growth factor 13; Microtubule-binding protein which directly binds tubulin and is involved in both polymerization and stabilization of microtubules. Through its action on microtubules, may participate to the refinement of axons by negatively regulating axonal and leading processes branching. Plays a crucial role in neuron polarization and migration in the cerebral cortex and the hippoc…
MCL	1	Red	76	FLCN	Folliculin; May be a tumor suppressor. May be involved in energy and/or nutrient sensing through the AMPK and mTOR signaling pathways. May regulate phosphorylation of RPS6KB1; DENN/MADD domain containing
MCL	1	Red	76	FOXG1	Forkhead box protein G1; Transcription repression factor which plays an important role in the establishment of the regional subdivision of the developing brain and in the development of the telencephalon; Forkhead boxes
MCL	1	Red	76	FRAS1	Fraser extracellular matrix complex subunit 1
MCL	1	Red	76	GABRB3	Gamma-aminobutyric acid receptor subunit beta-3; Component of the heteropentameric receptor for GABA, the major inhibitory neurotransmitter in the vertebrate brain. Functions also as histamine receptor and mediates cellular responses to histamine. Functions as receptor for diazepines and various anesthetics, such as pentobarbital; these are bound at a separate allosteric effector binding site. Fu…
MCL	1	Red	76	GATA4	Transcription factor GATA-4; Transcriptional activator that binds to the consensus sequence 5'-AGATAG-3' and plays a key role in cardiac development and function. In cooperation with TBX5, it binds to cardiac super-enhancers and promotes cardiomyocyte gene expression, while it downregulates endocardial and endothelial gene expression. Involved in bone morphogenetic protein (BMP)-mediated inductio…
MCL	1	Red	76	GATA6	Transcription factor GATA-6; Transcriptional activator. Regulates SEMA3C and PLXNA2. Involved in gene regulation specifically in the gastric epithelium. May regulate genes that protect epithelial cells from bacterial infection. Involved in bone morphogenetic protein (BMP)-mediated cardiac-specific gene expression (By similarity). Binds to BMP response element (BMPRE) DNA sequences within cardiac …
MCL	1	Red	76	GDNF	Glial cell line-derived neurotrophic factor; Neurotrophic factor that enhances survival and morphological differentiation of dopaminergic neurons and increases their high-affinity dopamine uptake; Belongs to the TGF-beta family. GDNF subfamily
MCL	1	Red	76	GFAP	Glial fibrillary acidic protein; GFAP, a class-III intermediate filament, is a cell- specific marker that, during the development of the central nervous system, distinguishes astrocytes from other glial cells
MCL	1	Red	76	GJA5	Gap junction alpha-5 protein; One gap junction consists of a cluster of closely packed pairs of transmembrane channels, the connexons, through which materials of low MW diffuse from one cell to a neighboring cell
MCL	1	Red	76	GLRB	Glycine receptor subunit beta; Glycine receptors are ligand-gated chloride channels. GLRB does not form ligand-gated ion channels by itself, but is part of heteromeric ligand-gated chloride channels. Channel opening is triggered by extracellular glycine. Heteropentameric channels composed of GLRB and GLRA1 are activated by lower glycine levels than homopentameric GLRA1. Plays an important role in…
MCL	1	Red	76	GRIA3	Glutamate receptor 3; Receptor for glutamate that functions as ligand-gated ion channel in the central nervous system and plays an important role in excitatory synaptic transmission. L-glutamate acts as an excitatory neurotransmitter at many synapses in the central nervous system. Binding of the excitatory neurotransmitter L- glutamate induces a conformation change, leading to the opening of the …
MCL	1	Red	76	GRIN1	Glutamate receptor ionotropic, NMDA 1; Component of NMDA receptor complexes that function as heterotetrameric, ligand-gated ion channels with high calcium permeability and voltage-dependent sensitivity to magnesium. Channel activation requires binding of the neurotransmitter glutamate to the epsilon subunit, glycine binding to the zeta subunit, plus membrane depolarization to eliminate channel in…
MCL	1	Red	76	GRIN2A	Glutamate receptor ionotropic, NMDA 2A; Component of NMDA receptor complexes that function as heterotetrameric, ligand-gated ion channels with high calcium permeability and voltage-dependent sensitivity to magnesium. Channel activation requires binding of the neurotransmitter glutamate to the epsilon subunit, glycine binding to the zeta subunit, plus membrane depolarization to eliminate channel i…
MCL	1	Red	76	GRIN2B	Glutamate receptor ionotropic, NMDA 2B; Component of NMDA receptor complexes that function as heterotetrameric, ligand-gated ion channels with high calcium permeability and voltage-dependent sensitivity to magnesium. Channel activation requires binding of the neurotransmitter glutamate to the epsilon subunit, glycine binding to the zeta subunit, plus membrane depolarization to eliminate channel i…
MCL	1	Red	76	GRIP1	Glutamate receptor-interacting protein 1; May play a role as a localized scaffold for the assembly of a multiprotein signaling complex and as mediator of the trafficking of its binding partners at specific subcellular location in neurons. Through complex formation with NSG1, GRIA2 and STX12 controls the intracellular fate of AMPAR and the endosomal sorting of the GRIA2 subunit toward recycling an…
MCL	1	Red	76	HCN4	Potassium/sodium hyperpolarization-activated cyclic nucleotide-gated channel 4; Hyperpolarization-activated ion channel with very slow activation and inactivation exhibiting weak selectivity for potassium over sodium ions. Contributes to the native pacemaker currents in heart (If) that regulate the rhythm of heart beat. May contribute to the native pacemaker currents in neurons (Ih). May mediate …
MCL	1	Red	76	HOMER2	Homer protein homolog 2; Postsynaptic density scaffolding protein. Binds and cross-links cytoplasmic regions of GRM1, GRM5, ITPR1, DNM3, RYR1, RYR2, SHANK1 and SHANK3. By physically linking GRM1 and GRM5 with ER-associated ITPR1 receptors, it aids the coupling of surface receptors to intracellular calcium release. May also couple GRM1 to PI3 kinase through its interaction with AGAP2. Isoforms can…
MCL	1	Red	76	IER3IP1	Immediate early response 3-interacting protein 1; May be implicated in the regulation of apoptosis. May be involved in protein transport between endoplasmic reticulum and Golgi apparatus (By similarity)
MCL	1	Red	76	IQSEC2	IQ motif and SEC7 domain-containing protein 2; Is a guanine nucleotide exchange factor for the ARF GTP- binding proteins; X-linked mental retardation
MCL	1	Red	76	ITPR1	Inositol 1,4,5-trisphosphate receptor type 1; Intracellular channel that mediates calcium release from the endoplasmic reticulum following stimulation by inositol 1,4,5- trisphosphate. Involved in the regulation of epithelial secretion of electrolytes and fluid through the interaction with AHCYL1 (By similarity). Plays a role in ER stress-induced apoptosis. Cytoplasmic calcium released from the E…
MCL	1	Red	76	KCND3	Potassium voltage-gated channel subfamily D member 3; Pore-forming (alpha) subunit of voltage-gated rapidly inactivating A-type potassium channels. May contribute to I(To) current in heart and I(Sa) current in neurons. Channel properties are modulated by interactions with other alpha subunits and with regulatory subunits; Belongs to the potassium channel family. D (Shal) (TC 1.A.1.2) subfamily. K…
MCL	1	Red	76	KCNJ11	ATP-sensitive inward rectifier potassium channel 11; This receptor is controlled by G proteins. Inward rectifier potassium channels are characterized by a greater tendency to allow potassium to flow into the cell rather than out of it. Their voltage dependence is regulated by the concentration of extracellular potassium; as external potassium is raised, the voltage range of the channel opening sh…
MCL	1	Red	76	KCNQ2	Potassium voltage-gated channel subfamily KQT member 2; Associates with KCNQ3 to form a potassium channel with essentially identical properties to the channel underlying the native M-current, a slowly activating and deactivating potassium conductance which plays a critical role in determining the subthreshold electrical excitability of neurons as well as the responsiveness to synaptic inputs. The…
MCL	1	Red	76	KCNT1	Potassium channel subfamily T member 1; Outwardly rectifying potassium channel subunit that may coassemble with other Slo-type channel subunits. Activated by high intracellular sodium or chloride levels. Activated upon stimulation of G-protein coupled receptors, such as CHRM1 and GRIA1. May be regulated by calcium in the absence of sodium ions (in vitro) (By similarity); Belongs to the potassium …
MCL	1	Red	76	KPTN	KICSTOR complex protein kaptin; As part of the KICSTOR complex functions in the amino acid-sensing branch of the TORC1 signaling pathway. Recruits, in an amino acid-independent manner, the GATOR1 complex to the lysosomal membranes and allows its interaction with GATOR2 and the RAG GTPases. Functions upstream of the RAG GTPases and is required to negatively regulate mTORC1 signaling in absence of …
MCL	1	Red	76	MBD5	Methyl-CpG-binding domain protein 5; Binds to heterochromatin. Does not interact with either methylated or unmethylated DNA (in vitro); Methyl-CpG binding domain containing
MCL	1	Red	76	MECP2	Methyl-CpG-binding protein 2; Chromosomal protein that binds to methylated DNA. It can bind specifically to a single methyl-CpG pair. It is not influenced by sequences flanking the methyl-CpGs. Mediates transcriptional repression through interaction with histone deacetylase and the corepressor SIN3A. Binds both 5-methylcytosine (5mC) and 5-hydroxymethylcytosine (5hmC)-containing DNA, with a prefe…
MCL	1	Red	76	NKX6-2	Homeobox protein Nkx-6.2; Transcription factor with repressor activity involved in the regulation of axon-glial interactions at myelin paranodes in oligodendrocytes. Binds to the consensus DNA sequence 5'- (A/T)TTAATGA-3'. In oligodendrocytes, binds to MBP and PLP1 promoter regions; NKL subclass homeoboxes and pseudogenes
MCL	1	Red	76	OXTR	Oxytocin receptor; Receptor for oxytocin. The activity of this receptor is mediated by G proteins which activate a phosphatidylinositol- calcium second messenger system; Arginine vasopressin and oxytocin receptors
MCL	1	Red	76	PAX2	Paired box protein Pax-2; Transcription factor that may have a role in kidney cell differentiation. Has a critical role in the development of the urogenital tract, the eyes, and the CNS; PRD class homeoboxes and pseudogenes
MCL	1	Red	76	PCDH19	Protocadherin-19; Potential calcium-dependent cell-adhesion protein; Non-clustered protocadherins
MCL	1	Red	76	PDX1	Pancreas/duodenum homeobox protein 1; Activates insulin, somatostatin, glucokinase, islet amyloid polypeptide and glucose transporter type 2 gene transcription. Particularly involved in glucose-dependent regulation of insulin gene transcription. As part of a PDX1:PBX1b:MEIS2b complex in pancreatic acinar cells is involved in the transcriptional activation of the ELA1 enhancer; the complex binds t…
MCL	1	Red	76	PHOX2B	Paired mesoderm homeobox protein 2B; Involved in the development of several major noradrenergic neuron populations, including the locus coeruleus. Transcription factor which could determine a neurotransmitter phenotype in vertebrates. Enhances second-messenger-mediated activation of the dopamine beta-hydrolase and c-fos promoters, and of several enhancers including cAMP-response element and serum…
MCL	1	Red	76	POGZ	Pogo transposable element with ZNF domain; Plays a role in mitotic cell cycle progression and is involved in kinetochore assembly and mitotic sister chromatid cohesion. Probably through its association with CBX5 plays a role in mitotic chromosome segregation by regulating aurora kinase B/AURKB activation and AURKB and CBX5 dissociation from chromosome arms; DNA transposon derived genes
MCL	1	Red	76	POU3F3	POU domain, class 3, transcription factor 3; Transcription factor that acts synergistically with SOX11 and SOX4. Plays a role in neuronal development. Is implicated in an enhancer activity at the embryonic met- mesencephalic junction; the enhancer element contains the octamer motif (5'-ATTTGCAT-3') (By similarity); POU class homeoboxes and pseudogenes
MCL	1	Red	76	PRRT2	Proline rich transmembrane protein 2; Interferon induced transmembrane protein domain containing; Belongs to the CD225/Dispanin family
MCL	1	Red	76	RBFOX1	RNA binding protein fox-1 homolog 1; RNA-binding protein that regulates alternative splicing events by binding to 5'-UGCAUGU-3' elements. Regulates alternative splicing of tissue-specific exons and of differentially spliced exons during erythropoiesis
MCL	1	Red	76	RELN	Reelin; Extracellular matrix serine protease that plays a role in layering of neurons in the cerebral cortex and cerebellum. Regulates microtubule function in neurons and neuronal migration. Affects migration of sympathetic preganglionic neurons in the spinal cord, where it seems to act as a barrier to neuronal migration. Enzymatic activity is important for the modulation of cell adhesion. Bindin…
MCL	1	Red	76	RYR2	Ryanodine receptor 2; Calcium channel that mediates the release of Ca(2+) from the sarcoplasmic reticulum into the cytoplasm and thereby plays a key role in triggering cardiac muscle contraction. Aberrant channel activation can lead to cardiac arrhythmia. In cardiac myocytes, calcium release is triggered by increased Ca(2+) levels due to activation of the L-type calcium channel CACNA1C. The calci…
MCL	1	Red	76	SCN1A	Sodium channel protein type 1 subunit alpha; Mediates the voltage-dependent sodium ion permeability of excitable membranes. Assuming opened or closed conformations in response to the voltage difference across the membrane, the protein forms a sodium-selective channel through which Na(+) ions may pass in accordance with their electrochemical gradient. Plays a key role in brain, probably by regulat…
MCL	1	Red	76	SCN1B	Sodium channel subunit beta-1; Crucial in the assembly, expression, and functional modulation of the heterotrimeric complex of the sodium channel. The subunit beta-1 can modulate multiple alpha subunit isoforms from brain, skeletal muscle, and heart. Its association with NFASC may target the sodium channels to the nodes of Ranvier of developing axons and retain these channels at the nodes in matu…
MCL	1	Red	76	SCN2A	Sodium channel protein type 2 subunit alpha; Mediates the voltage-dependent sodium ion permeability of excitable membranes. Assuming opened or closed conformations in response to the voltage difference across the membrane, the protein forms a sodium-selective channel through which Na(+) ions may pass in accordance with their electrochemical gradient; Belongs to the sodium channel (TC 1.A.1.10) fa…
MCL	1	Red	76	SCN8A	Sodium channel protein type 8 subunit alpha; Mediates the voltage-dependent sodium ion permeability of excitable membranes. Assuming opened or closed conformations in response to the voltage difference across the membrane, the protein forms a sodium-selective channel through which Na(+) ions may pass in accordance with their electrochemical gradient. In macrophages and melanoma cells, isoform 5 m…
MCL	1	Red	76	SCN9A	Sodium channel protein type 9 subunit alpha; Mediates the voltage-dependent sodium ion permeability of excitable membranes. Assuming opened or closed conformations in response to the voltage difference across the membrane, the protein forms a sodium-selective channel through which Na(+) ions may pass in accordance with their electrochemical gradient. It is a tetrodotoxin-sensitive Na(+) channel i…
MCL	1	Red	76	SIX3	Homeobox protein SIX3; Transcriptional regulator which can act as both a transcriptional repressor and activator by binding a ATTA homeodomain core recognition sequence on these target genes. During forebrain development represses WNT1 expression allowing zona limitans intrathalamica formation and thereby ensuring proper anterio-posterior patterning of the diencephalon and formation of the rostra…
MCL	1	Red	76	SLC6A1	Sodium- and chloride-dependent GABA transporter 1; Terminates the action of GABA by its high affinity sodium-dependent reuptake into presynaptic terminals; Belongs to the sodium:neurotransmitter symporter (SNF) (TC 2.A.22) family. SLC6A1 subfamily
MCL	1	Red	76	SLC6A5	Solute carrier family 6 (neurotransmitter transporter, glycine) member 5/9; Sodium- and chloride-dependent glycine transporter 2; Terminates the action of glycine by its high affinity sodium-dependent reuptake into presynaptic terminals. May be responsible for the termination of neurotransmission at strychnine-sensitive glycinergic synapses; Belongs to the sodium:neurotransmitter symporter (SNF) …
MCL	1	Red	76	SLC9A6	Solute carrier family 9 (sodium/hydrogen exchanger), member 6/7; Sodium/hydrogen exchanger 6; Electroneutral exchange of protons for Na(+) and K(+) across the early and recycling endosome membranes. Contributes to calcium homeostasis; Solute carriers
MCL	1	Red	76	SPTAN1	Spectrin alpha chain, non-erythrocytic 1; Fodrin, which seems to be involved in secretion, interacts with calmodulin in a calcium-dependent manner and is thus candidate for the calcium-dependent movement of the cytoskeleton at the membrane; EF-hand domain containing
MCL	1	Red	76	STX1B	Syntaxin-1B; Potentially involved in docking of synaptic vesicles at presynaptic active zones. May mediate Ca(2+)-regulation of exocytosis acrosomal reaction in sperm (By similarity); Belongs to the syntaxin family
MCL	1	Red	76	STXBP1	Syntaxin-binding protein 1; May participate in the regulation of synaptic vesicle docking and fusion, possibly through interaction with GTP-binding proteins. Essential for neurotransmission and binds syntaxin, a component of the synaptic vesicle fusion machinery probably in a 1:1 ratio. Can interact with syntaxins 1, 2, and 3 but not syntaxin 4. May play a role in determining the specificity of i…
MCL	1	Red	76	SYNGAP1	Ras/Rap GTPase-activating protein SynGAP; Major constituent of the PSD essential for postsynaptic signaling. Inhibitory regulator of the Ras-cAMP pathway. Member of the NMDAR signaling complex in excitatory synapses, it may play a role in NMDAR-dependent control of AMPAR potentiation, AMPAR membrane trafficking and synaptic plasticity. Regulates AMPAR- mediated miniature excitatory postsynaptic c…
MCL	1	Red	76	TBC1D24	TBC1 domain family member 24; May act as a GTPase-activating protein for Rab family protein(s). Involved in neuronal projections development, probably through a negative modulation of ARF6 function; Deafness associated genes
MCL	1	Red	76	TBR1	T-box brain protein 1; Probable transcriptional regulator involved in developmental processes. Required for normal brain development; T-boxes
MCL	1	Red	76	TRIO	Triple functional domain protein; Guanine nucleotide exchange factor (GEF) for RHOA and RAC1 GTPases. Involved in coordinating actin remodeling, which is necessary for cell migration and growth. In developing hippocampal neurons, limits dendrite formation, without affecting the establishment of axon polarity. Once dendrites are formed, involved in the control of synaptic function by regulating th…
MCL	1	Red	76	TUBB3	Tubulin beta-3 chain; Tubulin is the major constituent of microtubules. It binds two moles of GTP, one at an exchangeable site on the beta chain and one at a non-exchangeable site on the alpha chain. TUBB3 plays a critical role in proper axon guidance and mantainance; Belongs to the tubulin family
MCL	1	Red	76	UBE3A	Ubiquitin-protein ligase E3A; E3 ubiquitin-protein ligase which accepts ubiquitin from an E2 ubiquitin-conjugating enzyme in the form of a thioester and transfers it to its substrates. Several substrates have been identified including the RAD23A and RAD23B, MCM7 (which is involved in DNA replication), annexin A1, the PML tumor suppressor, and the cell cycle regulator CDKN1B. Catalyzes the high-ri…
MCL	1	Red	76	UNC80	Unc-80 homolog, NALCN channel complex subunit; Protein unc-80 homolog; Component of the NALCN sodium channel complex, required for channel regulation. This complex is a cation channel activated by neuropeptides substance P, neurotensin, and extracellular calcium that regulates neuronal excitability by controlling the sizes of NALCN-dependent sodium-leak current. UNC80 is essential for NALCN sensi…
MCL	2	Salmon	73	AR	Androgen receptor; Steroid hormone receptors are ligand-activated transcription factors that regulate eukaryotic gene expression and affect cellular proliferation and differentiation in target tissues. Transcription factor activity is modulated by bound coactivator and corepressor proteins. Transcription activation is down-regulated by NR0B2. Activated, but not phosphorylated, by HIPK3 and ZIPK/D…
MCL	2	Salmon	73	ARID1B	AT-rich interactive domain-containing protein 1B; Involved in transcriptional activation and repression of select genes by chromatin remodeling (alteration of DNA-nucleosome topology). Component of SWI/SNF chromatin remodeling complexes that carry out key enzymatic activities, changing chromatin structure by altering DNA-histone contacts within a nucleosome in an ATP-dependent manner. Belongs to …
MCL	2	Salmon	73	ASPM	Abnormal spindle-like microcephaly-associated protein; Involved in mitotic spindle regulation and coordination of mitotic processes. The function in regulating microtubule dynamics at spindle poles including spindle orientation, astral microtubule density and poleward microtubule flux seems to depend on the association with the katanin complex formed by KATNA1 and KATNB1. Enhances the microtubule…
MCL	2	Salmon	73	ASXL1	Additional sex combs like 1, transcriptional regulator; Putative Polycomb group protein ASXL1; Probable Polycomb group (PcG) protein involved in transcriptional regulation mediated by ligand-bound nuclear hormone receptors, such as retinoic acid receptors (RARs) and peroxisome proliferator-activated receptor gamma (PPARG). Acts as coactivator of RARA and RXRA through association with NCOA1. Acts …
MCL	2	Salmon	73	ATG7	Ubiquitin-like modifier-activating enzyme ATG7; E1-like activating enzyme involved in the 2 ubiquitin- like systems required for cytoplasm to vacuole transport (Cvt) and autophagy. Activates ATG12 for its conjugation with ATG5 as well as the ATG8 family proteins for their conjugation with phosphatidylethanolamine. Both systems are needed for the ATG8 association to Cvt vesicles and autophagosomes…
MCL	2	Salmon	73	ATM	Serine-protein kinase ATM; Serine/threonine protein kinase which activates checkpoint signaling upon double strand breaks (DSBs), apoptosis and genotoxic stresses such as ionizing ultraviolet A light (UVA), thereby acting as a DNA damage sensor. Recognizes the substrate consensus sequence [ST]-Q. Phosphorylates 'Ser-139' of histone variant H2AX/H2AFX at double strand breaks (DSBs), thereby regula…
MCL	2	Salmon	73	ATR	Serine/threonine-protein kinase ATR; Serine/threonine protein kinase which activates checkpoint signaling upon genotoxic stresses such as ionizing radiation (IR), ultraviolet light (UV), or DNA replication stalling, thereby acting as a DNA damage sensor. Recognizes the substrate consensus sequence [ST]-Q. Phosphorylates BRCA1, CHEK1, MCM2, RAD17, RPA2, SMC1 and p53/TP53, which collectively inhibi…
MCL	2	Salmon	73	ATRIP	Three-prime repair exonuclease 1; ATR-interacting protein; Major cellular 3'-to-5' DNA exonuclease which digests single-stranded DNA (ssDNA) and double-stranded DNA (dsDNA) with mismatched 3' termini. Prevents cell-intrinsic initiation of autoimmunity. Acts by metabolizing DNA fragments from endogenous retroelements, including L1, LTR and SINE elements. Unless degraded, these DNA fragments accumu…
MCL	2	Salmon	73	ATRX	Transcriptional regulator ATRX; Involved in transcriptional regulation and chromatin remodeling. Facilitates DNA replication in multiple cellular environments and is required for efficient replication of a subset of genomic loci. Binds to DNA tandem repeat sequences in both telomeres and euchromatin and in vitro binds DNA quadruplex structures. May help stabilizing G-rich regions into regular chr…
MCL	2	Salmon	73	BPTF	Nucleosome-remodeling factor subunit BPTF; Histone-binding component of NURF (nucleosome-remodeling factor), a complex which catalyzes ATP-dependent nucleosome sliding and facilitates transcription of chromatin. Specifically recognizes H3 tails trimethylated on 'Lys-4' (H3K4me3), which mark transcription start sites of virtually all active genes. May also regulate transcription through direct bin…
MCL	2	Salmon	73	BRIP1	BRCA1 interacting protein C-terminal helicase 1; Fanconi anemia group J protein; DNA-dependent ATPase and 5' to 3' DNA helicase required for the maintenance of chromosomal stability. Acts late in the Fanconi anemia pathway, after FANCD2 ubiquitination. Involved in the repair of DNA double-strand breaks by homologous recombination in a manner that depends on its association with BRCA1
MCL	2	Salmon	73	BRPF1	Peregrin; Component of the MOZ/MORF complex which has a histone H3 acetyltransferase activity. Preferentially mediates histone H3-K23 acetylation. Positively regulates the transcription of RUNX1 and RUNX2; Bromodomain containing
MCL	2	Salmon	73	BUB1B	Mitotic checkpoint serine/threonine-protein kinase BUB1 beta; Essential component of the mitotic checkpoint. Required for normal mitosis progression. The mitotic checkpoint delays anaphase until all chromosomes are properly attached to the mitotic spindle. One of its checkpoint functions is to inhibit the activity of the anaphase-promoting complex/cyclosome (APC/C) by blocking the binding of CDC2…
MCL	2	Salmon	73	CDK5RAP2	CDK5 regulatory subunit-associated protein 2; Potential regulator of CDK5 activity via its interaction with CDK5R1. Negative regulator of centriole disengagement (licensing) which maintains centriole engagement and cohesion. Involved in regulation of mitotic spindle orientation (By similarity). Plays a role in the spindle checkpoint activation by acting as a transcriptional regulator of both BUBR…
MCL	2	Salmon	73	CDT1	DNA replication factor Cdt1; Required for both DNA replication and mitosis. DNA replication licensing factor, required for pre-replication complex assembly. Cooperates with CDC6 and the origin recognition complex (ORC) during G1 phase of the cell cycle to promote the loading of the mini-chromosome maintenance (MCM) complex onto DNA to generate pre-replication complexes (pre- RC). Required also fo…
MCL	2	Salmon	73	CENPE	Centromere-associated protein E; Microtubule plus-end-directed kinetochore motor which plays an important role in chromosome congression, microtubule- kinetochore conjugation and spindle assembly checkpoint activation. Drives chromosome congression (alignment of chromosomes at the spindle equator resulting in the formation of the metaphase plate) by mediating the lateral sliding of polar chromoso…
MCL	2	Salmon	73	CENPF	Centromere protein F; Required for kinetochore function and chromosome segregation in mitosis. Required for kinetochore localization of dynein, LIS1, NDE1 and NDEL1. Regulates recycling of the plasma membrane by acting as a link between recycling vesicles and the microtubule network though its association with STX4 and SNAP25. Acts as a potential inhibitor of pocket protein-mediated cellular proc…
MCL	2	Salmon	73	CENPJ	Centromere protein J; Plays an important role in cell division and centrosome function by participating in centriole duplication. Inhibits microtubule nucleation from the centrosome. Involved in the regulation of slow processive growth of centriolar microtubules. Acts as microtubule plus-end tracking protein that stabilizes centriolar microtubules and inhibits microtubule polymerization and exten…
MCL	2	Salmon	73	CEP152	Centrosomal protein of 152 kDa; Necessary for centrosome duplication; the function seems also to involve CEP63, CDK5RAP2 and WDR62 through a stepwise assembled complex at the centrosome that recruits CDK2 required for centriole duplication. Acts as a molecular scaffold facilitating the interaction of PLK4 and CENPJ, 2 molecules involved in centriole formation. Proposed to snatch PLK4 away from PL…
MCL	2	Salmon	73	CHD2	Chromodomain-helicase-DNA-binding protein 2; DNA-binding helicase that specifically binds to the promoter of target genes, leading to chromatin remodeling, possibly by promoting deposition of histone H3.3. Involved in myogenesis via interaction with MYOD1: binds to myogenic gene regulatory sequences and mediates incorporation of histone H3.3 prior to the onset of myogenic gene expression, promoti…
MCL	2	Salmon	73	CIC	Protein capicua homolog; Transcriptional repressor which plays a role in development of the central nervous system (CNS). In concert with ATXN1 and ATXN1L, involved in brain development
MCL	2	Salmon	73	CREBBP	CREB-binding protein; Acetylates histones, giving a specific tag for transcriptional activation. Also acetylates non-histone proteins, like NCOA3 and FOXO1. Binds specifically to phosphorylated CREB and enhances its transcriptional activity toward cAMP-responsive genes. Acts as a coactivator of ALX1. Acts as a circadian transcriptional coactivator which enhances the activity of the circadian tran…
MCL	2	Salmon	73	DHPS	Deoxyhypusine synthase; Catalyzes the NAD-dependent oxidative cleavage of spermidine and the subsequent transfer of the butylamine moiety of spermidine to the epsilon-amino group of a specific lysine residue of the eIF-5A precursor protein to form the intermediate deoxyhypusine residue
MCL	2	Salmon	73	DKC1	H/ACA ribonucleoprotein complex subunit 4; Isoform 1: Required for ribosome biogenesis and telomere maintenance. Probable catalytic subunit of H/ACA small nucleolar ribonucleoprotein (H/ACA snoRNP) complex, which catalyzes pseudouridylation of rRNA. This involves the isomerization of uridine such that the ribose is subsequently attached to C5, instead of the normal N1. Each rRNA can contain up to…
MCL	2	Salmon	73	DNA2	DNA replication ATP-dependent helicase/nuclease DNA2; Key enzyme involved in DNA replication and DNA repair in nucleus and mitochondrion. Involved in Okazaki fragments processing by cleaving long flaps that escape FEN1: flaps that are longer than 27 nucleotides are coated by replication protein A complex (RPA), leading to recruit DNA2 which cleaves the flap until it is too short to bind RPA and b…
MCL	2	Salmon	73	DOCK7	Dedicator of cytokinesis protein 7; Functions as a guanine nucleotide exchange factor (GEF), which activates Rac1 and Rac3 Rho small GTPases by exchanging bound GDP for free GTP. Does not have a GEF activity for CDC42. Required for STMN1 'Ser-15' phosphorylation during axon formation and consequently for neuronal polarization. Has a role in pigmentation (By similarity). Involved in the regulation…
MCL	2	Salmon	73	EHMT1	[histone h3]-lysine9 n-trimethyltransferase ehmt; Histone-lysine N-methyltransferase EHMT1; Histone methyltransferase that specifically mono- and dimethylates 'Lys-9' of histone H3 (H3K9me1 and H3K9me2, respectively) in euchromatin. H3K9me represents a specific tag for epigenetic transcriptional repression by recruiting HP1 proteins to methylated histones. Also weakly methylates 'Lys-27' of histo…
MCL	2	Salmon	73	EP300	Histone acetyltransferase p300; Functions as histone acetyltransferase and regulates transcription via chromatin remodeling. Acetylates all four core histones in nucleosomes. Histone acetylation gives an epigenetic tag for transcriptional activation. Mediates cAMP-gene regulation by binding specifically to phosphorylated CREB protein. Mediates acetylation of histone H3 at 'Lys-122' (H3K122ac), a …
MCL	2	Salmon	73	ERBB2	Receptor tyrosine-protein kinase erbB-2; Protein tyrosine kinase that is part of several cell surface receptor complexes, but that apparently needs a coreceptor for ligand binding. Essential component of a neuregulin-receptor complex, although neuregulins do not interact with it alone. GP30 is a potential ligand for this receptor. Regulates outgrowth and stabilization of peripheral microtubules (…
MCL	2	Salmon	73	ERCC2	TFIIH basal transcription factor complex helicase XPD subunit; ATP-dependent 5'-3' DNA helicase, component of the core- TFIIH basal transcription factor. Involved in nucleotide excision repair (NER) of DNA by opening DNA around the damage, and in RNA transcription by RNA polymerase II by anchoring the CDK-activating kinase (CAK) complex, composed of CDK7, cyclin H and MAT1, to the core-TFIIH comp…
MCL	2	Salmon	73	FANCA	Fanconi anemia group A protein; DNA repair protein that may operate in a postreplication repair or a cell cycle checkpoint function. May be involved in interstrand DNA cross-link repair and in the maintenance of normal chromosome stability; Fanconi anemia complementation groups
MCL	2	Salmon	73	FANCG	Fanconi anemia group G protein; DNA repair protein that may operate in a postreplication repair or a cell cycle checkpoint function. May be implicated in interstrand DNA cross-link repair and in the maintenance of normal chromosome stability. Candidate tumor suppressor gene; Fanconi anemia complementation groups
MCL	2	Salmon	73	FANCI	Fanconi anemia group I protein; Plays an essential role in the repair of DNA double- strand breaks by homologous recombination and in the repair of interstrand DNA cross-links (ICLs) by promoting FANCD2 monoubiquitination by FANCL and participating in recruitment to DNA repair sites. Required for maintenance of chromosomal stability. Specifically binds branched DNA: binds both single- stranded DN…
MCL	2	Salmon	73	FANCL	E3 ubiquitin-protein ligase FANCL; Ubiquitin ligase protein that mediates monoubiquitination of FANCD2 in the presence of UBE2T, a key step in the DNA damage pathway. Also mediates monoubiquitination of FANCI. May stimulate the ubiquitin release from UBE2W. May be required for proper primordial germ cell proliferation in the embryonic stage, whereas it is probably not needed for spermatogonial pr…
MCL	2	Salmon	73	FANCM	Fanconi anemia group M protein; DNA-dependent ATPase component of the Fanconi anemia (FA) core complex. Required for the normal activation of the FA pathway, leading to monoubiquitination of the FANCI-FANCD2 complex in response to DNA damage, cellular resistance to DNA cross-linking drugs, and prevention of chromosomal breakage. In complex with CENPS and CENPX, binds double-stranded DNA (dsDNA), …
MCL	2	Salmon	73	GTF2H5	General transcription factor IIH subunit 5; Component of the TFIIH basal transcription factor involved in nucleotide excision repair (NER) of DNA and, when complexed to CAK, in RNA transcription by RNA polymerase II. Necessary for the stability of the TFIIH complex and for the presence of normal levels of TFIIH in the cell; General transcription factors
MCL	2	Salmon	73	HERC2	E3 ubiquitin-protein ligase HERC2; E3 ubiquitin-protein ligase that regulates ubiquitin- dependent retention of repair proteins on damaged chromosomes. Recruited to sites of DNA damage in response to ionizing radiation (IR) and facilitates the assembly of UBE2N and RNF8 promoting DNA damage-induced formation of 'Lys-63'-linked ubiquitin chains. Acts as a mediator of binding specificity between UB…
MCL	2	Salmon	73	HYLS1	HYLS1, centriolar and ciliogenesis associated; Hydrolethalus syndrome protein 1; Plays a role in ciliogenesis
MCL	2	Salmon	73	INPP5K	Inositol polyphosphate 5-phosphatase K; Inositol 5-phosphatase which acts on inositol 1,4,5- trisphosphate, inositol 1,3,4,5-tetrakisphosphate, phosphatidylinositol 4,5-bisphosphate and phosphatidylinositol 3,4,5-trisphosphate. Has 6-fold higher affinity for phosphatidylinositol 4,5-bisphosphate than for inositol 1,4,5- trisphosphate. Negatively regulates assembly of the actin cytoskeleton. Contr…
MCL	2	Salmon	73	KAT6B	Histone acetyltransferase KAT6B; Histone acetyltransferase which may be involved in both positive and negative regulation of transcription. Required for RUNX2-dependent transcriptional activation. May be involved in cerebral cortex development. Component of the MOZ/MORF complex which has a histone H3 acetyltransferase activity; Belongs to the MYST (SAS/MOZ) family
MCL	2	Salmon	73	KDM5B	Lysine-specific demethylase 5B; Histone demethylase that demethylates 'Lys-4' of histone H3, thereby playing a central role in histone code. Does not demethylate histone H3 'Lys-9' or H3 'Lys-27'. Demethylates trimethylated, dimethylated and monomethylated H3 'Lys-4'. Acts as a transcriptional corepressor for FOXG1B and PAX9. Favors the proliferation of breast cancer cells by repressing tumor sup…
MCL	2	Salmon	73	KIZ	Centrosomal protein kizuna; Centrosomal protein required for establishing a robust mitotic centrosome architecture that can endure the forces that converge on the centrosomes during spindle formation. Required for stabilizing the expanded pericentriolar material around the centriole; Belongs to the kizuna family
MCL	2	Salmon	73	KLLN	Killin, p53 regulated dna replication inhibitor; Killin; DNA-binding protein involved in S phase checkpoint control-coupled apoptosis by mediating p53/TP53-induced apoptosis. Has the ability to inhibit DNA synthesis and S phase arrest coupled to apoptosis. Has affinity to both double- and single- stranded DNA
MCL	2	Salmon	73	MCPH1	Microcephalin 1; Microcephalin; Implicated in chromosome condensation and DNA damage induced cellular responses. May play a role in neurogenesis and regulation of the size of the cerebral cortex
MCL	2	Salmon	73	NBN	Nibrin; Component of the MRE11-RAD50-NBN (MRN complex) which plays a critical role in the cellular response to DNA damage and the maintenance of chromosome integrity. The complex is involved in double-strand break (DSB) repair, DNA recombination, maintenance of telomere integrity, cell cycle checkpoint control and meiosis. The complex possesses single-strand endonuclease activity and double-stran…
MCL	2	Salmon	73	NDE1	Nuclear distribution protein nudE homolog 1; Required for centrosome duplication and formation and function of the mitotic spindle. Essential for the development of the cerebral cortex. May regulate the production of neurons by controlling the orientation of the mitotic spindle during division of cortical neuronal progenitors of the proliferative ventricular zone of the brain. Orientation of the …
MCL	2	Salmon	73	NF1	Neurofibromin; Stimulates the GTPase activity of Ras. NF1 shows greater affinity for Ras GAP, but lower specific activity. May be a regulator of Ras activity; Armadillo-like helical domain containing
MCL	2	Salmon	73	NUP107	Nuclear pore complex protein Nup107; Plays a role in the nuclear pore complex (NPC) assembly and/or maintenance. Required for the assembly of peripheral proteins into the NPC. May anchor NUP62 to the NPC; Belongs to the nucleoporin Nup84/Nup107 family
MCL	2	Salmon	73	PAFAH1B1	Platelet-activating factor acetylhydrolase IB subunit alpha; Required for proper activation of Rho GTPases and actin polymerization at the leading edge of locomoting cerebellar neurons and postmigratory hippocampal neurons in response to calcium influx triggered via NMDA receptors. Non-catalytic subunit of an acetylhydrolase complex which inactivates platelet- activating factor (PAF) by removing …
MCL	2	Salmon	73	PAFAH1B3	Platelet-activating factor acetylhydrolase IB subunit gamma; Inactivates paf by removing the acetyl group at the sn-2 position. This is a catalytic subunit. Plays an important role during the development of brain; Belongs to the 'GDSL' lipolytic enzyme family. Platelet-activating factor acetylhydrolase IB beta/gamma subunits subfamily
MCL	2	Salmon	73	PALB2	Partner and localizer of BRCA2; Plays a critical role in homologous recombination repair (HRR) through its ability to recruit BRCA2 and RAD51 to DNA breaks. Strongly stimulates the DNA strand-invasion activity of RAD51, stabilizes the nucleoprotein filament against a disruptive BRC3-BRC4 polypeptide and helps RAD51 to overcome the suppressive effect of replication protein A (RPA). Functionally co…
MCL	2	Salmon	73	PAX3	Paired box protein Pax-3; Transcription factor that may regulate cell proliferation, migration and apoptosis. Involved in neural development and myogenesis. Transcriptional activator of MITF, acting synergistically with SOX10; Belongs to the paired homeobox family
MCL	2	Salmon	73	PCNT	Pericentrin; Integral component of the filamentous matrix of the centrosome involved in the initial establishment of organized microtubule arrays in both mitosis and meiosis. Plays a role, together with DISC1, in the microtubule network formation. Is an integral component of the pericentriolar material (PCM). May play an important role in preventing premature centrosome splitting during interphas…
MCL	2	Salmon	73	PNKP	Bifunctional polynucleotide phosphatase/kinase; Plays a key role in the repair of DNA damage, functioning as part of both the non-homologous end-joining (NHEJ) and base excision repair (BER) pathways. Through its two catalytic activities, PNK ensures that DNA termini are compatible with extension and ligation by either removing 3'-phosphates from, or by phosphorylating 5'-hydroxyl groups on, the …
MCL	2	Salmon	73	PRDX1	Peroxiredoxin-1; Thiol-specific peroxidase that catalyzes the reduction of hydrogen peroxide and organic hydroperoxides to water and alcohols, respectively. Plays a role in cell protection against oxidative stress by detoxifying peroxides and as sensor of hydrogen peroxide-mediated signaling events. Might participate in the signaling cascades of growth factors and tumor necrosis factor-alpha by r…
MCL	2	Salmon	73	PTEN	Phosphatase and tensin homolog; Tumor suppressor. Acts as a dual-specificity protein phosphatase, dephosphorylating tyrosine-, serine- and threonine- phosphorylated proteins. Also acts as a lipid phosphatase, removing the phosphate in the D3 position of the inositol ring from phosphatidylinositol 3,4,5-trisphosphate, phosphatidylinositol 3,4-diphosphate, phosphatidylinositol 3- phosphate and inos…
MCL	2	Salmon	73	RAD50	DNA repair protein RAD50; Component of the MRN complex, which plays a central role in double-strand break (DSB) repair, DNA recombination, maintenance of telomere integrity and meiosis. The complex possesses single-strand endonuclease activity and double-strand- specific 3'-5' exonuclease activity, which are provided by MRE11. RAD50 may be required to bind DNA ends and hold them in close proximit…
MCL	2	Salmon	73	RBBP8	Rb binding protein 8, endonuclease; DNA endonuclease RBBP8; Endonuclease that cooperates with the MRE11-RAD50-NBN (MRN) complex in DNA-end resection, the first step of double- strand break (DSB) repair through the homologous recombination (HR) pathway. HR is restricted to S and G2 phases of the cell cycle and preferentially repairs DSBs resulting from replication fork collapse. Key determinant of…
MCL	2	Salmon	73	SMARCAL1	SWI/SNF-related matrix-associated actin-dependent regulator of chromatin subfamily A-like protein 1; ATP-dependent annealing helicase that binds selectively to fork DNA relative to ssDNA or dsDNA and catalyzes the rewinding of the stably unwound DNA. Rewinds single-stranded DNA bubbles that are stably bound by replication protein A (RPA). Acts throughout the genome to reanneal stably unwound DNA,…
MCL	2	Salmon	73	SMARCB1	Swi/snf related, matrix associated, actin dependent regulator of chromatin, subfamily b, member 1; SWI/SNF-related matrix-associated actin-dependent regulator of chromatin subfamily B member 1; Core component of the BAF (hSWI/SNF) complex. This ATP- dependent chromatin-remodeling complex plays important roles in cell proliferation and differentiation, in cellular antiviral activities and inhibiti…
MCL	2	Salmon	73	SMC1A	Structural maintenance of chromosomes protein 1A; Involved in chromosome cohesion during cell cycle and in DNA repair. Central component of cohesin complex. The cohesin complex is required for the cohesion of sister chromatids after DNA replication. The cohesin complex apparently forms a large proteinaceous ring within which sister chromatids can be trapped. At anaphase, the complex is cleaved an…
MCL	2	Salmon	73	STIL	SCL-interrupting locus protein; Immediate-early gene. Plays an important role in embryonic development as well as in cellular growth and proliferation; its long-term silencing affects cell survival and cell cycle distribution as well as decreases CDK1 activity correlated with reduced phosphorylation of CDK1. Plays a role as a positive regulator of the sonic hedgehog pathway, acting downstream of …
MCL	2	Salmon	73	SYNE1	Nesprin-1; Multi-isomeric modular protein which forms a linking network between organelles and the actin cytoskeleton to maintain the subcellular spatial organization. As a component of the LINC (LInker of Nucleoskeleton and Cytoskeleton) complex involved in the connection between the nuclear lamina and the cytoskeleton. The nucleocytoplasmic interactions established by the LINC complex play an i…
MCL	2	Salmon	73	TCF4	Transcription factor 4; Transcription factor that binds to the immunoglobulin enchancer Mu-E5/KE5-motif. Involved in the initiation of neuronal differentiation. Activates transcription by binding to the E box (5'-CANNTG-3'). Binds to the E-box present in the somatostatin receptor 2 initiator element (SSTR2-INR) to activate transcription (By similarity). Preferentially binds to either 5'-ACANNTGT-…
MCL	2	Salmon	73	TERT	Telomerase reverse transcriptase; Telomerase is a ribonucleoprotein enzyme essential for the replication of chromosome termini in most eukaryotes. Active in progenitor and cancer cells. Inactive, or very low activity, in normal somatic cells. Catalytic component of the teleromerase holoenzyme complex whose main activity is the elongation of telomeres by acting as a reverse transcriptase that adds…
MCL	2	Salmon	73	TINF2	TERF1-interacting nuclear factor 2; Component of the shelterin complex (telosome) that is involved in the regulation of telomere length and protection. Shelterin associates with arrays of double-stranded TTAGGG repeats added by telomerase and protects chromosome ends; without its protective activity, telomeres are no longer hidden from the DNA damage surveillance and chromosome ends are inappropr…
MCL	2	Salmon	73	TSC2	Tuberin; In complex with TSC1, this tumor suppressor inhibits the nutrient-mediated or growth factor-stimulated phosphorylation of S6K1 and EIF4EBP1 by negatively regulating mTORC1 signaling. Acts as a GTPase-activating protein (GAP) for the small GTPase RHEB, a direct activator of the protein kinase activity of mTORC1. May also play a role in microtubule-mediated protein transport. Also stimulat…
MCL	2	Salmon	73	TUBA1A	Tubulin alpha-1A chain; Tubulin is the major constituent of microtubules. It binds two moles of GTP, one at an exchangeable site on the beta chain and one at a non-exchangeable site on the alpha chain; Tubulins
MCL	2	Salmon	73	TUBB	Tubulin beta chain; Tubulin is the major constituent of microtubules. It binds two moles of GTP, one at an exchangeable site on the beta chain and one at a non-exchangeable site on the alpha chain; Tubulins
MCL	2	Salmon	73	TUBG1	Tubulin gamma-1 chain; Tubulin is the major constituent of microtubules. The gamma chain is found at microtubule organizing centers (MTOC) such as the spindle poles or the centrosome. Pericentriolar matrix component that regulates alpha/beta chain minus-end nucleation, centrosome duplication and spindle formation; Tubulins
MCL	2	Salmon	73	VPS53	Vacuolar protein sorting-associated protein 53 homolog; Acts as component of the GARP complex that is involved in retrograde transport from early and late endosomes to the trans-Golgi network (TGN). The GARP complex is required for the maintenance of the cycling of mannose 6-phosphate receptors between the TGN and endosomes, this cycling is necessary for proper lysosomal sorting of acid hydrolase…
MCL	2	Salmon	73	WWOX	WW domain-containing oxidoreductase; Putative oxidoreductase. Acts as a tumor suppressor and plays a role in apoptosis. Required for normal bone development (By similarity). May function synergistically with p53/TP53 to control genotoxic stress-induced cell death. Plays a role in TGFB1 signaling and TGFB1-mediated cell death. May also play a role in tumor necrosis factor (TNF)-mediated cell death…
MCL	2	Salmon	73	ZNF335	Zinc finger protein 335; Component or associated component of some histone methyltransferase complexes may regulate transcription through recruitment of those complexes on gene promoters. Enhances ligand- dependent transcriptional activation by nuclear hormone receptors. Plays an important role in neural progenitor cell proliferation and self-renewal through the regulation of specific genes invol…
MCL	3	Fire Brick	67	ABCA4	Atp-binding cassette, subfamily a (abc1), member 4; Retinal-specific ATP-binding cassette transporter; In the visual cycle, acts as an inward-directed retinoid flipase, retinoid substrates imported by ABCA4 from the extracellular or intradiscal (rod) membrane surfaces to the cytoplasmic membrane surface are all-trans-retinaldehyde (ATR) and N-retinyl-phosphatidyl-ethanolamine (NR-PE). Once transp…
MCL	3	Fire Brick	67	AHI1	Abelson helper integration site 1; Jouberin; Involved in vesicle trafficking and required for ciliogenesis, formation of primary non-motile cilium, and recruitment of RAB8A to the basal body of primary cilium. Component of the tectonic-like complex, a complex localized at the transition zone of primary cilia and acting as a barrier that prevents diffusion of transmembrane proteins between the cil…
MCL	3	Fire Brick	67	AIPL1	Aryl-hydrocarbon-interacting protein-like 1; May be important in protein trafficking and/or protein folding and stabilization; FKBP prolyl isomerases
MCL	3	Fire Brick	67	ALMS1	ALMS1, centrosome and basal body associated protein; Alstrom syndrome protein 1; Involved in PCM1-dependent intracellular transport. Required, directly or indirectly, for the localization of NCAPD2 to the proximal ends of centrioles. Required for proper formation and/or maintenance of primary cilia (PC), microtubule-based structures that protrude from the surface of epithelial cells
MCL	3	Fire Brick	67	ARL13B	ADP-ribosylation factor-like protein 13B; Cilium-specific protein required to control the microtubule-based, ciliary axoneme structure. May act by maintaining the association between IFT subcomplexes A and B. Binds GTP but is not able to hydrolyze it; the GTPase activity remains unclear. Required to pattern the neural tube. Involved in cerebral cortex development: required for the initial formati…
MCL	3	Fire Brick	67	BBS1	Bardet-Biedl syndrome 1 protein; The BBSome complex is thought to function as a coat complex required for sorting of specific membrane proteins to the primary cilia. The BBSome complex is required for ciliogenesis but is dispensable for centriolar satellite function. This ciliogenic function is mediated in part by the Rab8 GDP/GTP exchange factor, which localizes to the basal body and contacts th…
MCL	3	Fire Brick	67	BBS10	Bardet-Biedl syndrome 10 protein; Probable molecular chaperone. Assists the folding of proteins upon ATP hydrolysis. As part of the BBS/CCT complex may play a role in the assembly of BBSome, a complex involved in ciliogenesis regulating transports vesicles to the cilia. Involved in adipogenic differentiation; Belongs to the TCP-1 chaperonin family
MCL	3	Fire Brick	67	BBS2	Bardet-Biedl syndrome 2 protein; The BBSome complex is thought to function as a coat complex required for sorting of specific membrane proteins to the primary cilia. The BBSome complex is required for ciliogenesis but is dispensable for centriolar satellite function. This ciliogenic function is mediated in part by the Rab8 GDP/GTP exchange factor, which localizes to the basal body and contacts th…
MCL	3	Fire Brick	67	BBS5	Bardet-Biedl syndrome 5 protein; The BBSome complex is thought to function as a coat complex required for sorting of specific membrane proteins to the primary cilia. The BBSome complex is required for ciliogenesis but is dispensable for centriolar satellite function. This ciliogenic function is mediated in part by the Rab8 GDP/GTP exchange factor, which localizes to the basal body and contacts th…
MCL	3	Fire Brick	67	BEST1	Bestrophin-1; Forms calcium-sensitive chloride channels. Highly permeable to bicarbonate; Bestrophins
MCL	3	Fire Brick	67	C5orf42	Protein JBTS17; Involved in ciliogenesis. Involved in the establishment of cell polarity required for directional cell migration. Proposed to act in association with the CPLANE (ciliogenesis and planar polarity effectors) complex. Involved in recruitment of peripheral IFT-A proteins to basal bodies (By similarity)
MCL	3	Fire Brick	67	CC2D2A	Coiled-coil and C2 domain-containing protein 2A; Component of the tectonic-like complex, a complex localized at the transition zone of primary cilia and acting as a barrier that prevents diffusion of transmembrane proteins between the cilia and plasma membranes. Required for ciliogenesis and sonic hedgehog/SHH signaling (By similarity)
MCL	3	Fire Brick	67	CDH23	Cadherin related 23; Cadherin-23; Cadherins are calcium-dependent cell adhesion proteins. They preferentially interact with themselves in a homophilic manner in connecting cells. CDH23 is required for establishing and/or maintaining the proper organization of the stereocilia bundle of hair cells in the cochlea and the vestibule during late embryonic/early postnatal development. It is part of the …
MCL	3	Fire Brick	67	CEP120	Centrosomal protein of 120 kDa; Plays a role in the microtubule-dependent coupling of the nucleus and the centrosome. Involved in the processes that regulate centrosome-mediated interkinetic nuclear migration (INM) of neural progenitors and for proper positioning of neurons during brain development. Also implicated in the migration and selfrenewal of neural progenitors. Required for centriole dup…
MCL	3	Fire Brick	67	CEP164	Centrosomal protein of 164 kDa; Plays a role in microtubule organization and/or maintenance for the formation of primary cilia (PC), a microtubule-based structure that protrudes from the surface of epithelial cells. Plays a critical role in G2/M checkpoint and nuclear divisions. A key player in the DNA damage-activated ATR/ATM signaling cascade since it is required for the proper phosphorylation …
MCL	3	Fire Brick	67	CEP290	Centrosomal protein of 290 kDa; Involved in early and late steps in cilia formation. Its association with CCP110 is required for inhibition of primary cilia formation by CCP110. May play a role in early ciliogenesis in the disappearance of centriolar satellites and in the transition of primary ciliar vesicles (PCVs) to capped ciliary vesicles (CCVs). Required for the centrosomal recruitment of RA…
MCL	3	Fire Brick	67	CEP41	Centrosomal protein of 41 kDa; Required during ciliogenesis for tubulin glutamylation in cilium. Probably acts by participating in the transport of TTLL6, a tubulin polyglutamylase, between the basal body and the cilium; Belongs to the CEP41 family
MCL	3	Fire Brick	67	CEP83	Coiled-coil domain-containing protein 41; Centrosomal protein of 83 kDa; Component of the distal appendage region of the centriole involved in the initiation of primary cilium assembly. May collaborate with IFT20 in the trafficking of ciliary membrane proteins from the Golgi complex to the cilium during the initiation of primary cilium assembly
MCL	3	Fire Brick	67	CLRN1	Clarin-1; May have a role in the excitatory ribbon synapse junctions between hair cells and cochlear ganglion cells and presumably also in analogous synapses within the retina; Belongs to the clarin family
MCL	3	Fire Brick	67	CNGA1	cGMP-gated cation channel alpha-1; Visual signal transduction is mediated by a G-protein coupled cascade using cGMP as second messenger. This protein can be activated by cyclic GMP which leads to an opening of the cation channel and thereby causing a depolarization of rod photoreceptors; Belongs to the cyclic nucleotide-gated cation channel (TC 1.A.1.5) family. CNGA1 subfamily
MCL	3	Fire Brick	67	CNGB1	Cyclic nucleotide-gated cation channel beta-1; Subunit of cyclic nucleotide-gated (CNG) channels, nonselective cation channels, which play important roles in both visual and olfactory signal transduction. When associated with CNGA1, it is involved in the regulation of ion flow into the rod photoreceptor outer segment (ROS), in response to light-induced alteration of the levels of intracellular cG…
MCL	3	Fire Brick	67	CRB1	Protein crumbs homolog 1; Plays a role in photoreceptor morphogenesis in the retina. May maintain cell polarization and adhesion; Belongs to the Crumbs protein family
MCL	3	Fire Brick	67	CRX	Cone-rod homeobox protein; Transcription factor that binds and transactivates the sequence 5'-TAATC[CA]-3' which is found upstream of several photoreceptor-specific genes, including the opsin genes. Acts synergistically with other transcription factors, such as NRL, RORB and RAX, to regulate photoreceptor cell-specific gene transcription. Essential for the maintenance of mammalian photoreceptors;…
MCL	3	Fire Brick	67	DHDDS	Dehydrodolichyl diphosphate synthase complex subunit DHDDS; With DHDDS, forms the dehydrodolichyl diphosphate synthase (DDS) complex, an essential component of the dolichol monophosphate (Dol-P) biosynthetic machinery. Adds multiple copies of isopentenyl pyrophosphate (IPP) to farnesyl pyrophosphate (FPP) to produce dehydrodolichyl diphosphate (Dedol-PP), a precursor of dolichol which is utilized…
MCL	3	Fire Brick	67	DYNC2H1	Cytoplasmic dynein 2 heavy chain 1; May function as a motor for intraflagellar retrograde transport. Functions in cilia biogenesis. May play a role in transport between endoplasmic reticulum and Golgi or organization of the Golgi in cells (By similarity); Dyneins, cytoplasmic
MCL	3	Fire Brick	67	EYS	Protein eyes shut homolog; Required to maintain the integrity of photoreceptor cells; Belongs to the EYS family
MCL	3	Fire Brick	67	GLI3	Transcriptional activator GLI3; Has a dual function as a transcriptional activator and a repressor of the sonic hedgehog (Shh) pathway, and plays a role in limb development. The full-length GLI3 form (GLI3FL) after phosphorylation and nuclear translocation, acts as an activator (GLI3A) while GLI3R, its C-terminally truncated form, acts as a repressor. A proper balance between the GLI3 activator a…
MCL	3	Fire Brick	67	GPR161	G-protein coupled receptor 161; Key negative regulator of Shh signaling, which promotes the processing of GLI3 into GLI3R during neural tube development. Recruited by TULP3 and the IFT-A complex to primary cilia and acts as a regulator of the PKA-dependent basal repression machinery in Shh signaling by increasing cAMP levels, leading to promote the PKA-dependent processing of GLI3 into GLI3R and …
MCL	3	Fire Brick	67	GUCY2D	Retinal guanylyl cyclase 1; Probably plays a specific functional role in the rods and/or cones of photoreceptors. It may be the enzyme involved in the resynthesis of cGMP required for recovery of the dark state after phototransduction; Guanylate cyclase receptors
MCL	3	Fire Brick	67	IFT140	Intraflagellar transport protein 140 homolog; Component of the IFT complex A (IFT-A), a complex required for retrograde ciliary transport. Plays a pivotal role in proper development and function of ciliated cells. Involved in ciliogenesis and cilia maintenance. May play a role in ciliary assembly. Required for the development and maintenance of the outer segments of rod and cone photoreceptor cel…
MCL	3	Fire Brick	67	IFT74	Intraflagellar transport protein 74 homolog; Component of the intraflagellar transport (IFT) complex B: together with IFT81, forms a tubulin-binding module that specifically mediates transport of tubulin within the cilium. Binds beta-tubulin via its basic region. Required for ciliogenesis; Belongs to the IFT74 family
MCL	3	Fire Brick	67	IMPDH1	Inosine-5'-monophosphate dehydrogenase 1; Catalyzes the conversion of inosine 5'-phosphate (IMP) to xanthosine 5'-phosphate (XMP), the first committed and rate- limiting step in the de novo synthesis of guanine nucleotides, and therefore plays an important role in the regulation of cell growth. Could also have a single-stranded nucleic acid-binding activity and could play a role in RNA and/or DNA…
MCL	3	Fire Brick	67	IQCB1	IQ calmodulin-binding motif-containing protein 1; Involved in ciliogenesis. The function in an early step in cilia formation depends on its association with CEP290/NPHP6. Involved in regulation of the BBSome complex integrity, specifically for presence of BBS2 and BBS5 in the complex, and in ciliary targeting of selected BBSome cargos. May play a role in controlling entry of the BBSome complex to…
MCL	3	Fire Brick	67	KIAA0586	Protein TALPID3; Required for ciliogenesis and sonic hedgehog/SHH signaling. Required for the centrosomal recruitment of RAB8A and for the targeting of centriole satellite proteins to centrosomes such as of PCM1. May play a role in early ciliogenesis in the disappearance of centriolar satellites that preceeds ciliary vesicle formation. Involved in regulation of cell intracellular organization. In…
MCL	3	Fire Brick	67	KIAA0753	Protein moonraker; Involved in centriole duplication. Positively regulates CEP63 centrosomal localization. Required for WDR62 centrosomal localization and promotes the centrosomal localization of CDK2
MCL	3	Fire Brick	67	MITF	Microphthalmia-associated transcription factor; Transcription factor that regulates the expression of genes with essential roles in cell differentiation, proliferation and survival. Binds to M-boxes (5'-TCATGTG-3') and symmetrical DNA sequences (E-boxes) (5'-CACGTG-3') found in the promoters of target genes, such as BCL2 and tyrosinase (TYR). Plays an important role in melanocyte development by r…
MCL	3	Fire Brick	67	MKKS	McKusick-Kaufman/Bardet-Biedl syndromes putative chaperonin; Probable molecular chaperone. Assists the folding of proteins upon ATP hydrolysis. As part of the BBS/CCT complex plays a role in the assembly of BBSome, a complex involved in ciliogenesis regulating transports vesicles to the cilia. May play a role in protein processing in limb, cardiac and reproductive system development. May play a r…
MCL	3	Fire Brick	67	MKS1	Meckel syndrome type 1 protein; Component of the tectonic-like complex, a complex localized at the transition zone of primary cilia and acting as a barrier that prevents diffusion of transmembrane proteins between the cilia and plasma membranes. Involved in centrosome migration to the apical cell surface during early ciliogenesis. Required for ciliary structure and function, including a role in r…
MCL	3	Fire Brick	67	MYO7A	Unconventional myosin-VIIa; Myosins are actin-based motor molecules with ATPase activity. Unconventional myosins serve in intracellular movements. Their highly divergent tails bind to membranous compartments, which are then moved relative to actin filaments. In the retina, plays an important role in the renewal of the outer photoreceptor disks. Plays an important role in the distribution and migr…
MCL	3	Fire Brick	67	MYO9A	Unconventional myosin-IXa; Myosins are actin-based motor molecules with ATPase activity. Unconventional myosins serve in intracellular movements. Regulates Rho activity in neurons, has a role in the regulation of neuronal morphology and function (By similarity); Belongs to the TRAFAC class myosin-kinesin ATPase superfamily. Myosin family
MCL	3	Fire Brick	67	NMNAT1	Nicotinamide/nicotinic acid mononucleotide adenylyltransferase 1; Catalyzes the formation of NAD(+) from nicotinamide mononucleotide (NMN) and ATP. Can also use the deamidated form; nicotinic acid mononucleotide (NaMN) as substrate with the same efficiency. Can use triazofurin monophosphate (TrMP) as substrate. Also catalyzes the reverse reaction, i.e. the pyrophosphorolytic cleavage of NAD(+). F…
MCL	3	Fire Brick	67	NPHP3	Nephrocystin-3; Required for normal ciliary development and function. Inhibits disheveled-1-induced canonical Wnt-signaling activity and may also play a role in the control of non-canonical Wnt signaling which regulates planar cell polarity. Probably acts as a molecular switch between different Wnt signaling pathways. Required for proper convergent extension cell movements
MCL	3	Fire Brick	67	NR2E3	Photoreceptor-specific nuclear receptor; Orphan nuclear receptor of retinal photoreceptor cells. Transcriptional factor that is an activator of rod development and repressor of cone development. Binds the promoter region of a number of rod- and cone-specific genes, including rhodopsin, M- and S-opsin and rod-specific phosphodiesterase beta subunit. Enhances rhodopsin expression. Represses M- and …
MCL	3	Fire Brick	67	OFD1	Oral-facial-digital syndrome 1 protein; Component of the centrioles controlling mother and daughter centrioles length. Recruits to the centriole IFT88 and centriole distal appendage-specific proteins including CEP164. Involved in the biogenesis of the cilium, a centriole-associated function. The cilium is a cell surface projection found in many vertebrate cells required to transduce signals impor…
MCL	3	Fire Brick	67	PDE6A	Rod cGMP-specific 3',5'-cyclic phosphodiesterase subunit alpha; This protein participates in processes of transmission and amplification of the visual signal; Belongs to the cyclic nucleotide phosphodiesterase family
MCL	3	Fire Brick	67	PDE6B	Rod cGMP-specific 3',5'-cyclic phosphodiesterase subunit beta; This protein participates in processes of transmission and amplification of the visual signal. Necessary for the formation of a functional phosphodiesterase holoenzyme; Belongs to the cyclic nucleotide phosphodiesterase family
MCL	3	Fire Brick	67	PIBF1	Progesterone immunomodulatory binding factor 1; Progesterone-induced-blocking factor 1; Isoform 1: Pericentriolar protein required to maintain mitotic spindle pole integrity. Required for the centrosomal accumulation of PCM1 and the recruitment of centriolar satellite proteins such as BBS4. Via association with PCM1 may be involved in primary cilia formation. Required for CEP63 centrosomal locali…
MCL	3	Fire Brick	67	PRPH2	Peripherin-2; May function as an adhesion molecule involved in stabilization and compaction of outer segment disks or in the maintenance of the curvature of the rim. It is essential for disk morphogenesis; Belongs to the PRPH2/ROM1 family
MCL	3	Fire Brick	67	PTCH1	Protein patched homolog 1; Acts as a receptor for sonic hedgehog (SHH), indian hedgehog (IHH) and desert hedgehog (DHH). Associates with the smoothened protein (SMO) to transduce the hedgehog's proteins signal. Seems to have a tumor suppressor function, as inactivation of this protein is probably a necessary, if not sufficient step for tumorigenesis; Belongs to the patched family
MCL	3	Fire Brick	67	RBP3	Retinol-binding protein 3; IRBP shuttles 11-cis and all trans retinoids between the retinol isomerase in the pigment epithelium and the visual pigments in the photoreceptor cells of the retina
MCL	3	Fire Brick	67	RDH12	Retinol dehydrogenase 12; Exhibits an oxidoreductive catalytic activity towards retinoids. Most efficient as an NADPH-dependent retinal reductase. Displays high activity toward 9-cis and all-trans-retinol. Also involved in the metabolism of short-chain aldehydes. No steroid dehydrogenase activity detected. Might be the key enzyme in the formation of 11-cis-retinal from 11-cis-retinol during regen…
MCL	3	Fire Brick	67	RLBP1	Retinaldehyde-binding protein 1; Soluble retinoid carrier essential the proper function of both rod and cone photoreceptors. Participates in the regeneration of active 11-cis-retinol and 11-cis-retinaldehyde, from the inactive 11-trans products of the rhodopsin photocycle and in the de novo synthesis of these retinoids from 11-trans metabolic precursors. The cycling of retinoids between photorece…
MCL	3	Fire Brick	67	ROM1	Rod outer segment membrane protein 1; May function as an adhesion molecule involved in stabilization and compaction of outer segment disks or in the maintenance of the curvature of the rim. It is essential for disk morphogenesis; Tetraspanins
MCL	3	Fire Brick	67	RPE65	Retinoid isomerohydrolase / lutein isomerase; Retinoid isomerohydrolase; Critical isomerohydrolase in the retinoid cycle involved in regeneration of 11-cis-retinal, the chromophore of rod and cone opsins. Catalyzes the cleavage and isomerization of all-trans- retinyl fatty acid esters to 11-cis-retinol which is further oxidized by 11-cis retinol dehydrogenase to 11-cis-retinal for use as visual c…
MCL	3	Fire Brick	67	RPGRIP1L	Protein fantom; Negatively regulates signaling through the G-protein coupled thromboxane A2 receptor (TBXA2R). May be involved in mechanisms like programmed cell death, craniofacial development, patterning of the limbs, and formation of the left- right axis (By similarity). Involved in the organization of apical junctions; the function is proposed to implicate a NPHP1-4-8 module. Does not seem to…
MCL	3	Fire Brick	67	SHH	Sonic hedgehog protein; Sonic hedgehog protein: The C-terminal part of the sonic hedgehog protein precursor displays an autoproteolysis and a cholesterol transferase activity (By similarity). Both activities result in the cleavage of the full-length protein into two parts (ShhN and ShhC) followed by the covalent attachment of a cholesterol moiety to the C-terminal of the newly generated ShhN (By …
MCL	3	Fire Brick	67	SLC45A1	Solute carrier family 45, member 1/2/4; Proton-associated sugar transporter A; Proton-associated glucose transporter in the brain; Belongs to the glycoside-pentoside-hexuronide (GPH) cation symporter transporter (TC 2.A.2) family
MCL	3	Fire Brick	67	TMEM107	Transmembrane protein 107; Plays a role in cilia formation and embryonic patterning. Requires for normal Sonic hedgehog (Shh) signaling in the neural tube and acts in combination with GLI2 and GLI3 to pattern ventral and intermediate neuronal cell types (By similarity). During ciliogenesis regulates the ciliary transition zone localization of some MKS complex proteins
MCL	3	Fire Brick	67	TMEM216	Transmembrane protein 216; Part of the tectonic-like complex which is required for tissue-specific ciliogenesis and may regulate ciliary membrane composition
MCL	3	Fire Brick	67	TMEM67	Transmembrane protein 67; Meckelin; Required for ciliary structure and function. Part of the tectonic-like complex which is required for tissue-specific ciliogenesis and may regulate ciliary membrane composition (By similarity). Involved in centrosome migration to the apical cell surface during early ciliogenesis. Involved in the regulation of cilia length and appropriate number through the contr…
MCL	3	Fire Brick	67	TRIM32	E3 ubiquitin-protein ligase TRIM32; Has an E3 ubiquitin ligase activity. Ubiquitinates DTNBP1 (dysbindin) and promotes its degradation. May ubiquitinate BBS2. May play a significant role in mediating the biological activity of the HIV-1 Tat protein in vivo. Binds specifically to the activation domain of HIV-1 Tat and can also interact with the HIV-2 and EIAV Tat proteins in vivo; Belongs to the T…
MCL	3	Fire Brick	67	TULP1	Tubby-related protein 1; Required for normal development of photoreceptor synapses. Required for normal photoreceptor function and for long- term survival of photoreceptor cells. Interacts with cytoskeleton proteins and may play a role in protein transport in photoreceptor cells (By similarity). Binds lipids, especially phosphatidylinositol 3-phosphate, phosphatidylinositol 4- phosphate, phosphat…
MCL	3	Fire Brick	67	USH1C	Harmonin; Anchoring/scaffolding protein that is a part of the functional network formed by USH1C, USH1G, CDH23 and MYO7A that mediates mechanotransduction in cochlear hair cells. Required for normal development and maintenance of cochlear hair cell bundles (By similarity). As part of the intermicrovillar adhesion complex/IMAC plays a role in brush border differentiation, controlling microvilli or…
MCL	3	Fire Brick	67	USH2A	Usherin; Involved in hearing and vision; Fibronectin type III domain containing
MCL	3	Fire Brick	67	WDR19	WD repeat-containing protein 19; Component of the IFT complex A (IFT-A), a complex required for retrograde ciliary transport. Involved in cilia function and/or assembly (By similarity). Associates with the BBSome complex to mediate ciliary transport (By similarity); Intraflagellar transport proteins
MCL	3	Fire Brick	67	WFS1	Wolframin er transmembrane glycoprotein; Wolframin; Participates in the regulation of cellular Ca(2+) homeostasis, at least partly, by modulating the filling state of the endoplasmic reticulum Ca(2+) store; Deafness associated genes
MCL	3	Fire Brick	67	ZNF513	Zinc finger protein 513; Transcriptional regulator that plays a role in retinal development and maintenance; Zinc fingers C2H2-type
MCL	4	Brown	55	ACAD9	Acyl-CoA dehydrogenase family member 9, mitochondrial; Required for mitochondrial complex I assembly. Has a dehydrogenase activity on palmitoyl-CoA (C16:0) and stearoyl-CoA (C18:0). It is three times more active on palmitoyl-CoA than on stearoyl-CoA. However, it does not play a primary role in long-chain fatty acid oxidation in vivo. Has little activity on octanoyl-CoA (C8:0), butyryl-CoA (C4:0) …
MCL	4	Brown	55	ACADM	Medium-chain specific acyl-CoA dehydrogenase, mitochondrial; Acyl-CoA dehydrogenase specific for acyl chain lengths of 4 to 16 that catalyzes the initial step of fatty acid beta- oxidation. Utilizes the electron transfer flavoprotein (ETF) as an electron acceptor to transfer electrons to the main mitochondrial respiratory chain via ETF-ubiquinone oxidoreductase (ETF dehydrogenase)
MCL	4	Brown	55	ACADS	Short-chain specific acyl-CoA dehydrogenase, mitochondrial; Introduces a double bond at position 2 in saturated acyl-CoA's of short chain length, i.e. less than 6 carbon atoms; Belongs to the acyl-CoA dehydrogenase family
MCL	4	Brown	55	ACADSB	Short/branched chain specific acyl-CoA dehydrogenase, mitochondrial; Has greatest activity toward short branched chain acyl- CoA derivative such as (s)-2-methylbutyryl-CoA, isobutyryl-CoA, and 2-methylhexanoyl-CoA as well as toward short straight chain acyl-CoAs such as butyryl-CoA and hexanoyl-CoA. Can use valproyl- CoA as substrate and may play a role in controlling the metabolic flux of valpro…
MCL	4	Brown	55	ACO2	Aconitate hydratase, mitochondrial; Catalyzes the isomerization of citrate to isocitrate via cis-aconitate; Belongs to the aconitase/IPM isomerase family
MCL	4	Brown	55	ACSF3	Acyl-CoA synthetase family member 3, mitochondrial; Catalyzes the initial reaction in intramitochondrial fatty acid synthesis, by activating malonate and methylmalonate, but not acetate, into their respective CoA thioester. May have some preference toward very-long-chain substrates; Acyl-CoA synthetase family
MCL	4	Brown	55	ACY1	ABHD14A-ACY1 readthrough; Aminoacylase-1; Involved in the hydrolysis of N-acylated or N-acetylated amino acids (except L-aspartate); Belongs to the peptidase M20A family
MCL	4	Brown	55	ADSL	Adenylosuccinate lyase; Catalyzes two non-sequential steps in de novo AMP synthesis: converts (S)-2-(5-amino-1-(5-phospho-D- ribosyl)imidazole-4-carboxamido)succinate (SAICAR) to fumarate plus 5-amino-1-(5-phospho-D-ribosyl)imidazole-4-carboxamide, and thereby also contributes to de novo IMP synthesis, and converts succinyladenosine monophosphate (SAMP) to AMP and fumarate; Belongs to the lyase 1…
MCL	4	Brown	55	ALDH5A1	Succinate-semialdehyde dehydrogenase, mitochondrial; Catalyzes one step in the degradation of the inhibitory neurotransmitter gamma-aminobutyric acid (GABA); Aldehyde dehydrogenases
MCL	4	Brown	55	ALDH7A1	Alpha-aminoadipic semialdehyde dehydrogenase; Multifunctional enzyme mediating important protective effects. Metabolizes betaine aldehyde to betaine, an important cellular osmolyte and methyl donor. Protects cells from oxidative stress by metabolizing a number of lipid peroxidation-derived aldehydes. Involved in lysine catabolism
MCL	4	Brown	55	ALDOB	Fructose-bisphosphate aldolase, class i; Belongs to the class I fructose-bisphosphate aldolase family
MCL	4	Brown	55	ASL	Argininosuccinate lyase
MCL	4	Brown	55	ASS1	Argininosuccinate synthase; One of the enzymes of the urea cycle, the metabolic pathway transforming neurotoxic amonia produced by protein catabolism into inocuous urea in the liver of ureotelic animals. Catalyzes the formation of arginosuccinate from aspartate, citrulline and ATP and together with ASL it is responsible for the biosynthesis of arginine in most body tissues; Belongs to the arginin…
MCL	4	Brown	55	BCS1L	Mitochondrial chaperone BCS1; Chaperone necessary for the assembly of mitochondrial respiratory chain complex III. Plays an important role in the maintenance of mitochondrial tubular networks, respiratory chain assembly and formation of the LETM1 complex; AAA ATPases
MCL	4	Brown	55	CAD	Carbamoyl-phosphate synthetase 2, aspartate transcarbamylase, and dihydroorotase; CAD protein; This protein is a "fusion" protein encoding four enzymatic activities of the pyrimidine pathway (GATase, CPSase, ATCase and DHOase); In the central section; belongs to the metallo- dependent hydrolases superfamily. DHOase family. CAD subfamily
MCL	4	Brown	55	CLPB	Caseinolytic peptidase B protein homolog; May function as a regulatory ATPase and be related to secretion/protein trafficking process; AAA ATPases
MCL	4	Brown	55	COX10	Protoheme IX farnesyltransferase, mitochondrial; Converts protoheme IX and farnesyl diphosphate to heme O; Mitochondrial respiratory chain complex assembly factors
MCL	4	Brown	55	COX4I2	Cytochrome c oxidase subunit 4 isoform 2, mitochondrial; This protein is one of the nuclear-coded polypeptide chains of cytochrome c oxidase, the terminal oxidase in mitochondrial electron transport
MCL	4	Brown	55	DBT	2-oxoisovalerate dehydrogenase E2 component (dihydrolipoyl transacylase); Dihydrolipoamide branched chain transacylase E2; The branched-chain alpha-keto dehydrogenase complex catalyzes the overall conversion of alpha-keto acids to acyl-CoA and CO(2). It contains multiple copies of three enzymatic components: branched-chain alpha-keto acid decarboxylase (E1), lipoamide acyltransferase (E2) and lip…
MCL	4	Brown	55	DHTKD1	Probable 2-oxoglutarate dehydrogenase E1 component DHKTD1, mitochondrial; The 2-oxoglutarate dehydrogenase complex catalyzes the overall conversion of 2-oxoglutarate to succinyl-CoA and CO(2). It contains multiple copies of three enzymatic components: 2- oxoglutarate dehydrogenase (E1), dihydrolipoamide succinyltransferase (E2) and lipoamide dehydrogenase (E3) (By similarity)
MCL	4	Brown	55	DHX30	Putative ATP-dependent RNA helicase DHX30; Plays an important role in the assembly of the mitochondrial large ribosomal subunit. Required for optimal function of the zinc-finger antiviral protein ZC3HAV1 (By similarity). Associates with mitochondrial DNA; DEAH-box helicases
MCL	4	Brown	55	DPYD	Dihydropyrimidine dehydrogenase [NADP(+)]; Involved in pyrimidine base degradation. Catalyzes the reduction of uracil and thymine. Also involved the degradation of the chemotherapeutic drug 5-fluorouracil; Belongs to the dihydropyrimidine dehydrogenase family
MCL	4	Brown	55	FH	Fumarate hydratase, mitochondrial; Also acts as a tumor suppressor; Belongs to the class-II fumarase/aspartase family. Fumarase subfamily
MCL	4	Brown	55	GCDH	Glutaryl-CoA dehydrogenase, mitochondrial; Catalyzes the oxidative decarboxylation of glutaryl-CoA to crotonyl-CoA and CO(2) in the degradative pathway of L-lysine, L-hydroxylysine, and L-tryptophan metabolism. It uses electron transfer flavoprotein as its electron acceptor. Isoform Short is inactive; Belongs to the acyl-CoA dehydrogenase family
MCL	4	Brown	55	GLDC	Glycine dehydrogenase (decarboxylating), mitochondrial; The glycine cleavage system catalyzes the degradation of glycine. The P protein (GLDC) binds the alpha-amino group of glycine through its pyridoxal phosphate cofactor; CO(2) is released and the remaining methylamine moiety is then transferred to the lipoamide cofactor of the H protein (GCSH)
MCL	4	Brown	55	HADHA	Trifunctional enzyme subunit alpha, mitochondrial; Bifunctional subunit; In the central section; belongs to the 3-hydroxyacyl- CoA dehydrogenase family
MCL	4	Brown	55	HADHB	hydroxyacyl-CoA dehydrogenase trifunctional multienzyme complex subunit beta
MCL	4	Brown	55	HPDL	4-hydroxyphenylpyruvate dioxygenase-like protein; May have dioxygenase activity
MCL	4	Brown	55	IVD	Isovaleryl-CoA dehydrogenase, mitochondrial; Acyl-CoA dehydrogenase family
MCL	4	Brown	55	LIAS	Lipoyl synthase, mitochondrial; Catalyzes the radical-mediated insertion of two sulfur atoms into the C-6 and C-8 positions of the octanoyl moiety bound to the lipoyl domains of lipoate-dependent enzymes, thereby converting the octanoylated domains into lipoylated derivatives
MCL	4	Brown	55	LIPT1	Lipoyltransferase 1, mitochondrial; Catalyzes the transfer of the lipoyl group from lipoyl- AMP to the specific lysine residue of lipoyl domains of lipoate- dependent enzymes; Belongs to the LplA family
MCL	4	Brown	55	LRPPRC	Leucine-rich PPR motif-containing protein, mitochondrial; May play a role in RNA metabolism in both nuclei and mitochondria. In the nucleus binds to HNRPA1-associated poly(A) mRNAs and is part of nmRNP complexes at late stages of mRNA maturation which are possibly associated with nuclear mRNA export. May bind mature mRNA in the nucleus outer membrane. In mitochondria binds to poly(A) mRNA. Plays …
MCL	4	Brown	55	MCCC1	Methylcrotonoyl-CoA carboxylase subunit alpha, mitochondrial; Biotin-attachment subunit of the 3-methylcrotonyl-CoA carboxylase, an enzyme that catalyzes the conversion of 3- methylcrotonyl-CoA to 3-methylglutaconyl-CoA, a critical step for leucine and isovaleric acid catabolism
MCL	4	Brown	55	MCCC2	Methylcrotonoyl-CoA carboxylase beta chain, mitochondrial; Carboxyltransferase subunit of the 3-methylcrotonyl-CoA carboxylase, an enzyme that catalyzes the conversion of 3- methylcrotonyl-CoA to 3-methylglutaconyl-CoA, a critical step for leucine and isovaleric acid catabolism; Belongs to the AccD/PCCB family
MCL	4	Brown	55	NDUFA9	NADH dehydrogenase [ubiquinone] 1 alpha subcomplex subunit 9, mitochondrial; Accessory subunit of the mitochondrial membrane respiratory chain NADH dehydrogenase (Complex I), that is believed not to be involved in catalysis. Complex I functions in the transfer of electrons from NADH to the respiratory chain. The immediate electron acceptor for the enzyme is believed to be ubiquinone; NADH:ubiquin…
MCL	4	Brown	55	NDUFAF3	NADH dehydrogenase [ubiquinone] 1 alpha subcomplex assembly factor 3; Essential factor for the assembly of mitochondrial NADH:ubiquinone oxidoreductase complex (complex I)
MCL	4	Brown	55	NDUFB3	NADH dehydrogenase [ubiquinone] 1 beta subcomplex subunit 3; Accessory subunit of the mitochondrial membrane respiratory chain NADH dehydrogenase (Complex I), that is believed not to be involved in catalysis. Complex I functions in the transfer of electrons from NADH to the respiratory chain. The immediate electron acceptor for the enzyme is believed to be ubiquinone
MCL	4	Brown	55	NDUFS2	NADH dehydrogenase [ubiquinone] iron-sulfur protein 2, mitochondrial; Core subunit of the mitochondrial membrane respiratory chain NADH dehydrogenase (Complex I) that is believed to belong to the minimal assembly required for catalysis. Complex I functions in the transfer of electrons from NADH to the respiratory chain. The immediate electron acceptor for the enzyme is believed to be ubiquinone
MCL	4	Brown	55	NDUFS7	NADH dehydrogenase [ubiquinone] iron-sulfur protein 7, mitochondrial; Core subunit of the mitochondrial membrane respiratory chain NADH dehydrogenase (Complex I) that is believed to belong to the minimal assembly required for catalysis. Complex I functions in the transfer of electrons from NADH to the respiratory chain. The immediate electron acceptor for the enzyme is believed to be ubiquinone
MCL	4	Brown	55	NUBPL	Iron-sulfur protein NUBPL; Required for the assembly of the mitochondrial membrane respiratory chain NADH dehydrogenase (Complex I). May deliver of one or more Fe-S clusters to complex I subunits; Belongs to the Mrp/NBP35 ATP-binding proteins family
MCL	4	Brown	55	OTC	Ornithine carbamoyltransferase, mitochondrial; Ornithine carbamoyltransferase; Belongs to the ATCase/OTCase family
MCL	4	Brown	55	PC	Pyruvate carboxylase, mitochondrial; Pyruvate carboxylase catalyzes a 2-step reaction, involving the ATP-dependent carboxylation of the covalently attached biotin in the first step and the transfer of the carboxyl group to pyruvate in the second. Catalyzes in a tissue specific manner, the initial reactions of glucose (liver, kidney) and lipid (adipose tissue, liver, brain) synthesis from pyruvate
MCL	4	Brown	55	PDHB	Pyruvate dehydrogenase E1 component subunit beta, mitochondrial; The pyruvate dehydrogenase complex catalyzes the overall conversion of pyruvate to acetyl-CoA and CO(2), and thereby links the glycolytic pathway to the tricarboxylic cycle
MCL	4	Brown	55	PHGDH	D-3-phosphoglycerate dehydrogenase; Catalyzes the reversible oxidation of 3-phospho-D- glycerate to 3-phosphonooxypyruvate, the first step of the phosphorylated L-serine biosynthesis pathway. Also catalyzes the reversible oxidation of 2-hydroxyglutarate to 2-oxoglutarate and the reversible oxidation of (S)-malate to oxaloacetate; Belongs to the D-isomer specific 2-hydroxyacid dehydrogenase family
MCL	4	Brown	55	POLG	DNA polymerase subunit gamma-1; Involved in the replication of mitochondrial DNA. Associates with mitochondrial DNA; Belongs to the DNA polymerase type-A family
MCL	4	Brown	55	PYCR1	Pyrroline-5-carboxylate reductase 1, mitochondrial; Housekeeping enzyme that catalyzes the last step in proline biosynthesis. Can utilize both NAD and NADP, but has higher affinity for NAD. Involved in the cellular response to oxidative stress
MCL	4	Brown	55	SCO1	Protein SCO1 homolog, mitochondrial; Thought to play a role in cellular copper homeostasis, mitochondrial redox signaling or insertion of copper into the active site of COX; Belongs to the SCO1/2 family
MCL	4	Brown	55	SDHA	Succinate dehydrogenase [ubiquinone] flavoprotein subunit, mitochondrial; Flavoprotein (FP) subunit of succinate dehydrogenase (SDH) that is involved in complex II of the mitochondrial electron transport chain and is responsible for transferring electrons from succinate to ubiquinone (coenzyme Q). Can act as a tumor suppressor; Belongs to the FAD-dependent oxidoreductase 2 family. FRD/SDH subfami…
MCL	4	Brown	55	SERAC1	Protein SERAC1; Plays an important role in the phosphatidylglycerol remodeling that is essential for both mitochondrial function and intracellular cholesterol trafficking. May catalyze the remodeling of phosphatidylglycerol and be involved in the transacylation- acylation reaction to produce phosphatidylglycerol-36:1. May be involved in bis(monoacylglycerol)phosphate biosynthetic pathway; Armadil…
MCL	4	Brown	55	SURF1	SURF1, cytochrome c oxidase assembly factor; Surfeit locus protein 1; Component of the MITRAC (mitochondrial translation regulation assembly intermediate of cytochrome c oxidase complex) complex, that regulates cytochrome c oxidase assembly
MCL	4	Brown	55	TMEM126B	Complex I assembly factor TMEM126B, mitochondrial; Chaperone protein involved in the assembly of the mitochondrial NADH:ubiquinone oxidoreductase complex (complex I). Participates in constructing the membrane arm of complex I
MCL	4	Brown	55	TMEM70	Transmembrane protein 70, mitochondrial; Involved in biogenesis of mitochondrial ATP synthase; Belongs to the TMEM70 family
MCL	4	Brown	55	UGT1A1	Udp glucuronosyltransferase family 1 member a1; UDP-glucuronosyltransferase 1-8; UDPGT is of major importance in the conjugation and subsequent elimination of potentially toxic xenobiotics and endogenous compounds. This isoform glucuronidates bilirubin IX- alpha to form both the IX-alpha-C8 and IX-alpha-C12 monoconjugates and diconjugate. Is also able to catalyze the glucuronidation of 17beta-est…
MCL	4	Brown	55	UMPS	Uridine 5'-monophosphate synthase; Uridine monophosphate synthetase; In the C-terminal section; belongs to the OMP decarboxylase family
MCL	4	Brown	55	UPB1	Beta-ureidopropionase 1; Beta-ureidopropionase; Converts N-carbamoyl-beta-aminoisobutyrate and N- carbamoyl-beta-alanine (3-ureidopropanoate) to, respectively, beta-aminoisobutyrate and beta-alanine, ammonia and carbon dioxide
MCL	5	Dark Golden Rod	27	ABCA7	ATP-binding cassette sub-family A member 7; Plays a role in phagocytosis by macrophages of apoptotic cells. Binds APOA1 and may function in apolipoprotein-mediated phospholipid efflux from cells. May also mediate cholesterol efflux. May regulate cellular ceramide homeostasis during keratinocytes differentiation; ATP binding cassette subfamily A
MCL	5	Dark Golden Rod	27	ACTA1	Actin, alpha skeletal muscle; Actins are highly conserved proteins that are involved in various types of cell motility and are ubiquitously expressed in all eukaryotic cells
MCL	5	Dark Golden Rod	27	AGRN	Agrin; Agrin N-terminal 110 kDa subunit: is involved in regulation of neurite outgrowth probably due to the presence of the glycosaminoglcan (GAG) side chains of heparan and chondroitin sulfate attached to the Ser/Thr- and Gly/Ser-rich regions. Also involved in modulation of growth factor signaling (By similarity); Proteoglycans
MCL	5	Dark Golden Rod	27	ALB	Serum albumin; Serum albumin, the main protein of plasma, has a good binding capacity for water, Ca(2+), Na(+), K(+), fatty acids, hormones, bilirubin and drugs. Its main function is the regulation of the colloidal osmotic pressure of blood. Major zinc transporter in plasma, typically binds about 80% of all plasma zinc; Belongs to the ALB/AFP/VDB family
MCL	5	Dark Golden Rod	27	ANO5	Anoctamin-5; Does not exhibit calcium-activated chloride channel (CaCC) activity; Anoctamins
MCL	5	Dark Golden Rod	27	APOE	Apolipoprotein E; Mediates the binding, internalization, and catabolism of lipoprotein particles. It can serve as a ligand for the LDL (apo B/E) receptor and for the specific apo-E receptor (chylomicron remnant) of hepatic tissues; Apolipoproteins
MCL	5	Dark Golden Rod	27	ARFGEF1	Brefeldin A-inhibited guanine nucleotide-exchange protein 1; Promotes guanine-nucleotide exchange on ARF1 and ARF3. Promotes the activation of ARF1/ARF3 through replacement of GDP with GTP. Involved in vesicular trafficking. Required for the maintenance of Golgi structure; the function may be independent of its GEF activity. Required for the maturaion of integrin beta-1 in the Golgi. Involved in …
MCL	5	Dark Golden Rod	27	ATP7B	Copper-transporting ATPase 2; Copper ion transmembrane transporter involved in the export of copper out of the cells, such as the efflux of hepatic copper into the bile; ATPase copper transporting
MCL	5	Dark Golden Rod	27	BCHE	Butyrylcholinesterase; Cholinesterase; Esterase with broad substrate specificity. Contributes to the inactivation of the neurotransmitter acetylcholine. Can degrade neurotoxic organophosphate esters; Belongs to the type-B carboxylesterase/lipase family
MCL	5	Dark Golden Rod	27	CAPN3	Calpain-3; Calcium-regulated non-lysosomal thiol-protease; Calpains
MCL	5	Dark Golden Rod	27	COL18A1	Collagen alpha-1(XVIII) chain; Probably plays a major role in determining the retinal structure as well as in the closure of the neural tube; Belongs to the multiplexin collagen family
MCL	5	Dark Golden Rod	27	COL2A1	Collagen alpha-1(II) chain; Type II collagen is specific for cartilaginous tissues. It is essential for the normal embryonic development of the skeleton, for linear growth and for the ability of cartilage to resist compressive forces
MCL	5	Dark Golden Rod	27	COLQ	Acetylcholinesterase collagenic tail peptide; Anchors the catalytic subunits of asymmetric AChE to the synaptic basal lamina
MCL	5	Dark Golden Rod	27	CP	Ceruloplasmin; Ceruloplasmin is a blue, copper-binding (6-7 atoms per molecule) glycoprotein. It has ferroxidase activity oxidizing Fe(2+) to Fe(3+) without releasing radical oxygen species. It is involved in iron transport across the cell membrane. Provides Cu(2+) ions for the ascorbate-mediated deaminase degradation of the heparan sulfate chains of GPC1. May also play a role in fetal lung devel…
MCL	5	Dark Golden Rod	27	DMD	Dystrophin; Anchors the extracellular matrix to the cytoskeleton via F-actin. Ligand for dystroglycan. Component of the dystrophin- associated glycoprotein complex which accumulates at the neuromuscular junction (NMJ) and at a variety of synapses in the peripheral and central nervous systems and has a structural function in stabilizing the sarcolemma. Also implicated in signaling events and synap…
MCL	5	Dark Golden Rod	27	ELN	Elastin; Major structural protein of tissues such as aorta and nuchal ligament, which must expand rapidly and recover completely. Molecular determinant of the late arterial morphogenesis, stabilizing arterial structure by regulating proliferation and organization of vascular smooth muscle (By similarity)
MCL	5	Dark Golden Rod	27	FBN1	Fibrillin-1; Fibrillin-1: Structural component of the 10-12 nm diameter microfibrils of the extracellular matrix, which conveys both structural and regulatory properties to load-bearing connective tissues. Fibrillin-1- containing microfibrils provide long-term force bearing structural support. In tissues such as the lung, blood vessels and skin, microfibrils form the periphery of the elastic fibe…
MCL	5	Dark Golden Rod	27	FKRP	Fukutin-related protein; Transferase involved in the biosynthesis of the phosphorylated O-mannosyl trisaccharide (N-acetylgalactosamine- beta-3-N-acetylglucosamine-beta-4-(phosphate-6-)mannose), a carbohydrate structure present in alpha-dystroglycan (DAG1), which is required for binding laminin G-like domain-containing extracellular proteins with high affinity
MCL	5	Dark Golden Rod	27	FLNA	Filamin-A; Promotes orthogonal branching of actin filaments and links actin filaments to membrane glycoproteins. Anchors various transmembrane proteins to the actin cytoskeleton and serves as a scaffold for a wide range of cytoplasmic signaling proteins. Interaction with FLNA may allow neuroblast migration from the ventricular zone into the cortical plate. Tethers cell surface- localized furin, m…
MCL	5	Dark Golden Rod	27	HSPG2	Basement membrane-specific heparan sulfate proteoglycan core protein; Integral component of basement membranes. Component of the glomerular basement membrane (GBM), responsible for the fixed negative electrostatic membrane charge, and which provides a barrier which is both size- and charge-selective. It serves as an attachment substrate for cells. Plays essential roles in vascularization. Critica…
MCL	5	Dark Golden Rod	27	LAMA2	Laminin subunit alpha-2; Binding to cells via a high affinity receptor, laminin is thought to mediate the attachment, migration and organization of cells into tissues during embryonic development by interacting with other extracellular matrix components
MCL	5	Dark Golden Rod	27	MYH7	Myosin heavy chain 6/7; Myosin-7; Myosins are actin-based motor molecules with ATPase activity essential for muscle contraction. Forms regular bipolar thick filaments that, together with actin thin filaments, constitute the fundamental contractile unit of skeletal and cardiac muscle; Belongs to the TRAFAC class myosin-kinesin ATPase superfamily. Myosin family
MCL	5	Dark Golden Rod	27	NEB	Nebulin
MCL	5	Dark Golden Rod	27	RYR1	Ryanodine receptor 1; Calcium channel that mediates the release of Ca(2+) from the sarcoplasmic reticulum into the cytoplasm and thereby plays a key role in triggering muscle contraction following depolarization of T-tubules. Repeated very high-level exercise increases the open probability of the channel and leads to Ca(2+) leaking into the cytoplasm. Can also mediate the release of Ca(2+) from i…
MCL	5	Dark Golden Rod	27	STAC3	SH3 and cysteine-rich domain-containing protein 3; In skeletal muscles contraction, may play a role in neuromuscular synaptic transmission
MCL	5	Dark Golden Rod	27	TREM2	Triggering receptor expressed on myeloid cells 2; Forms a receptor signaling complex with TYROBP and triggers activation of the immune responses in macrophages and dendritic cells. May have a role in chronic inflammations and may stimulate production of constitutive rather than inflammatory chemokines and cytokines; V-set domain containing
MCL	5	Dark Golden Rod	27	TTN	Titin; Key component in the assembly and functioning of vertebrate striated muscles. By providing connections at the level of individual microfilaments, it contributes to the fine balance of forces between the two halves of the sarcomere. The size and extensibility of the cross-links are the main determinants of sarcomere extensibility properties of muscle. In non-muscle cells, seems to play a ro…
MCL	6	Yellow	26	AIMP2	Aminoacyl tRNA synthase complex-interacting multifunctional protein 2; Required for assembly and stability of the aminoacyl- tRNA synthase complex. Mediates ubiquitination and degradation of FUBP1, a transcriptional activator of MYC, leading to MYC down-regulation which is required for aveolar type II cell differentiation. Blocks MDM2-mediated ubiquitination and degradation of p53/TP53. Functions…
MCL	6	Yellow	26	ASNS	Asparagine synthetase (glutamine-hydrolyzing); Asparagine synthetase
MCL	6	Yellow	26	ELAC2	Zinc phosphodiesterase ELAC protein 2; Zinc phosphodiesterase, which displays mitochondrial tRNA 3'-processing endonuclease activity. Involved in tRNA maturation, by removing a 3'-trailer from precursor tRNA
MCL	6	Yellow	26	EXOSC8	Exosome complex component RRP43; Non-catalytic component of the RNA exosome complex which has 3'->5' exoribonuclease activity and participates in a multitude of cellular RNA processing and degradation events. In the nucleus, the RNA exosome complex is involved in proper maturation of stable RNA species such as rRNA, snRNA and snoRNA, in the elimination of RNA processing by-products and non-coding…
MCL	6	Yellow	26	FBXL4	F-box and leucine rich repeat protein 4
MCL	6	Yellow	26	LARS	Leucine--tRNA ligase, cytoplasmic; Catalyzes the specific attachment of an amino acid to its cognate tRNA in a two step reaction: the amino acid (AA) is first activated by ATP to form AA-AMP and then transferred to the acceptor end of the tRNA. Exhibits a post-transfer editing activity to hydrolyze mischarged tRNAs; Aminoacyl tRNA synthetases, Class I
MCL	6	Yellow	26	MRPS34	28S ribosomal protein S34, mitochondrial; Required for mitochondrial translation, plays a role in maintaining the stability of the small ribosomal subunit and the 12S rRNA that are required for mitoribosome formation
MCL	6	Yellow	26	NARS	Asparagine--tRNA ligase, cytoplasmic; Aminoacyl tRNA synthetases, Class II
MCL	6	Yellow	26	NFIA	Nuclear factor 1 A-type; Recognizes and binds the palindromic sequence 5'- TTGGCNNNNNGCCAA-3' present in viral and cellular promoters and in the origin of replication of adenovirus type 2. These proteins are individually capable of activating transcription and replication
MCL	6	Yellow	26	PNPT1	Polyribonucleotide nucleotidyltransferase 1, mitochondrial; RNA-binding protein implicated in numerous RNA metabolic processes. Catalyzes the phosphorolysis of single-stranded polyribonucleotides processively in the 3'-to-5' direction. Mitochondrial intermembrane factor with RNA-processing exoribonulease activity. Component of the mitochondrial degradosome (mtEXO) complex, that degrades 3' overha…
MCL	6	Yellow	26	POLR1C	DNA-directed RNA polymerases I and III subunit RPAC1; DNA-dependent RNA polymerase catalyzes the transcription of DNA into RNA using the four ribonucleoside triphosphates as substrates. Common component of RNA polymerases I and III which synthesize ribosomal RNA precursors and small RNAs, such as 5S rRNA and tRNAs, respectively. RPAC1 is part of the Pol core element with the central large cleft a…
MCL	6	Yellow	26	POLR3A	DNA-directed RNA polymerase III subunit RPC1; DNA-dependent RNA polymerase catalyzes the transcription of DNA into RNA using the four ribonucleoside triphosphates as substrates. Largest and catalytic core component of RNA polymerase III which synthesizes small RNAs, such as 5S rRNA and tRNAs. Forms the polymerase active center together with the second largest subunit. A single-stranded DNA templa…
MCL	6	Yellow	26	PRF1	Perforin-1; Plays a key role in secretory granule-dependent cell death, and in defense against virus-infected or neoplastic cells. Plays an important role in killing other cells that are recognized as non-self by the immune system, e.g. in transplant rejection or some forms of autoimmune disease. Can insert into the membrane of target cells in its calcium-bound form, oligomerize and form large po…
MCL	6	Yellow	26	PUS3	tRNA pseudouridine(38/39) synthase; Formation of pseudouridine at position 39 in the anticodon stem and loop of transfer RNAs; Belongs to the tRNA pseudouridine synthase TruA family
MCL	6	Yellow	26	RARS2	Probable arginine--tRNA ligase, mitochondrial; arginyl-tRNA synthetase 2, mitochondrial; Aminoacyl tRNA synthetases, Class I
MCL	6	Yellow	26	SARS2	Serine--tRNA ligase, mitochondrial; Catalyzes the attachment of serine to tRNA(Ser). Is also probably able to aminoacylate tRNA(Sec) with serine, to form the misacylated tRNA L-seryl-tRNA(Sec), which will be further converted into selenocysteinyl-tRNA(Sec); Aminoacyl tRNA synthetases, Class II
MCL	6	Yellow	26	SBDS	Ribosome maturation protein SBDS; Required for the assembly of mature ribosomes and ribosome biogenesis. Together with EFL1, triggers the GTP- dependent release of EIF6 from 60S pre-ribosomes in the cytoplasm, thereby activating ribosomes for translation competence by allowing 80S ribosome assembly and facilitating EIF6 recycling to the nucleus, where it is required for 60S rRNA processing and nu…
MCL	6	Yellow	26	TRIT1	tRNA dimethylallyltransferase; Catalyzes the transfer of a dimethylallyl group onto the adenine at position 37 of both cytosolic and mitochondrial tRNAs, leading to the formation of N6-(dimethylallyl)adenosine (i(6)A); Belongs to the IPP transferase family
MCL	6	Yellow	26	TRMT1	tRNA (guanine(26)-N(2))-dimethyltransferase; Dimethylates a single guanine residue at position 26 of most tRNAs using S-adenosyl-L-methionine as donor of the methyl groups; Belongs to the class I-like SAM-binding methyltransferase superfamily. Trm1 family
MCL	6	Yellow	26	TRMT10A	tRNA methyltransferase 10 homolog A; S-adenosyl-L-methionine-dependent guanine N(1)- methyltransferase that catalyzes the formation of N(1)- methylguanine at position 9 (m1G9) in tRNAs. Probably not able to catalyze formation of N(1)- methyladenine at position 9 (m1A9) in tRNAs; Belongs to the class IV-like SAM-binding methyltransferase superfamily. TRM10 family
MCL	6	Yellow	26	TRMT5	tRNA (guanine(37)-N1)-methyltransferase; Involved in mitochondrial tRNA methylation. Specifically methylates the N1 position of guanosine-37 in various tRNAs. Methylation is not dependent on the nature of the nucleoside 5' of the target nucleoside. This is the first step in the biosynthesis of wybutosine (yW), a modified base adjacent to the anticodon of tRNAs and required for accurate decoding
MCL	6	Yellow	26	TSEN54	tRNA-splicing endonuclease subunit Sen54; Non-catalytic subunit of the tRNA-splicing endonuclease complex, a complex responsible for identification and cleavage of the splice sites in pre-tRNA. It cleaves pre-tRNA at the 5' and 3' splice sites to release the intron. The products are an intron and two tRNA half-molecules bearing 2',3' cyclic phosphate and 5'-OH termini. There are no conserved sequ…
MCL	6	Yellow	26	TSFM	Elongation factor Ts, mitochondrial; Associates with the EF-Tu.GDP complex and induces the exchange of GDP to GTP. It remains bound to the aminoacyl-tRNA.EF- Tu.GTP complex up to the GTP hydrolysis stage on the ribosome; Belongs to the EF-Ts family
MCL	6	Yellow	26	TTC37	Tetratricopeptide repeat protein 37; Component of the SKI complex which is thought to be involved in exosome-mediated RNA decay and associates with transcriptionally active genes in a manner dependent on PAF1 complex (PAF1C); Tetratricopeptide repeat domain containing
MCL	6	Yellow	26	WARS2	Tryptophanyl trna synthetase 2, mitochondrial; Tryptophan--tRNA ligase, mitochondrial; Mitochondrial aminoacyl-tRNA synthetase that activate and transfer the amino acids to their corresponding tRNAs during the translation of mitochondrial genes and protein synthesis
MCL	6	Yellow	26	YARS2	Tyrosine--tRNA ligase, mitochondrial; Catalyzes the attachment of tyrosine to tRNA(Tyr) in a two-step reaction: tyrosine is first activated by ATP to form Tyr- AMP and then transferred to the acceptor end of tRNA(Tyr); Belongs to the class-I aminoacyl-tRNA synthetase family
MCL	7	Dark Golden Rod 2	22	ARSA	Arylsulfatase A; Hydrolyzes cerebroside sulfate; Belongs to the sulfatase family
MCL	7	Dark Golden Rod 2	22	ASAH1	N-acylsphingosine amidohydrolase 1; Acid ceramidase; Hydrolyzes the sphingolipid ceramide into sphingosine and free fatty acid
MCL	7	Dark Golden Rod 2	22	ATP6V0A1	V-type proton ATPase 116 kDa subunit a isoform 1; Required for assembly and activity of the vacuolar ATPase. Potential role in differential targeting and regulation of the enzyme for a specific organelle (By similarity); V-type ATPases
MCL	7	Dark Golden Rod 2	22	BTD	Biotinidase; Catalytic release of biotin from biocytin, the product of biotin-dependent carboxylases degradation
MCL	7	Dark Golden Rod 2	22	CERS1	annotation not available
MCL	7	Dark Golden Rod 2	22	CRB2	Crumbs 2, cell polarity complex component; Protein crumbs homolog 2; Apical polarity protein that plays a central role during the epithelial-to-mesenchymal transition (EMT) at gastrulation, when newly specified mesodermal cells move inside the embryo. Acts by promoting cell ingression, the process by which cells leave the epithelial epiblast and move inside the embryo to form a new tissue layer. …
MCL	7	Dark Golden Rod 2	22	CSTB	Cystatin-a/b; Cystatin-B; This is an intracellular thiol proteinase inhibitor. Tightly binding reversible inhibitor of cathepsins L, H and B; Belongs to the cystatin family
MCL	7	Dark Golden Rod 2	22	CYB5R3	NADH-cytochrome b5 reductase 3; Desaturation and elongation of fatty acids, cholesterol biosynthesis, drug metabolism, and, in erythrocyte, methemoglobin reduction
MCL	7	Dark Golden Rod 2	22	DMXL2	DmX-like protein 2; May serve as a scaffold protein for MADD and RAB3GA on synaptic vesicles. Plays a role in the brain as a key controller of neuronal and endocrine homeostatic processes (By similarity); Deafness associated genes
MCL	7	Dark Golden Rod 2	22	GALC	Galactosylceramidase; Galactocerebrosidase; Hydrolyzes the galactose ester bonds of galactosylceramide, galactosylsphingosine, lactosylceramide, and monogalactosyldiglyceride. Enzyme with very low activity responsible for the lysosomal catabolism of galactosylceramide, a major lipid in myelin, kidney and epithelial cells of small intestine and colon; Belongs to the glycosyl hydrolase 59 family
MCL	7	Dark Golden Rod 2	22	GBA	Glucosylceramidase that catalyzes, within the lysosomal compartment, the hydrolysis of glucosylceramide/GlcCer into free ceramide and glucose . Thereby, plays a central role in the degradation of complex lipids and the turnover of cellular membranes . Through the production of ceramides, participates to the PKC-activated salvage pathway of ceramide formation . Also plays a role in cholesterol met…
MCL	7	Dark Golden Rod 2	22	HGSNAT	Heparan-alpha-glucosaminide N-acetyltransferase; Lysosomal acetyltransferase that acetylates the non- reducing terminal alpha-glucosamine residue of intralysosomal heparin or heparan sulfate, converting it into a substrate for luminal alpha-N-acetyl glucosaminidase
MCL	7	Dark Golden Rod 2	22	IDUA	Alpha-L-iduronidase; Iduronidase, alpha-L-
MCL	7	Dark Golden Rod 2	22	MADD	MAP kinase-activating death domain protein; Plays a significant role in regulating cell proliferation, survival and death through alternative mRNA splicing. Isoform 5 shows increased cell proliferation and isoform 2 shows decreased. Converts GDP-bound inactive form of RAB3A, RAB3C and RAB3D to the GTP-bound active forms. Component of the TNFRSF1A signaling complex: MADD links TNFRSF1A with MAP ki…
MCL	7	Dark Golden Rod 2	22	MFSD8	Major facilitator superfamily domain-containing protein 8; May be a carrier that transport small solutes by using chemiosmotic ion gradients; Belongs to the major facilitator superfamily
MCL	7	Dark Golden Rod 2	22	NPC1	Niemann-Pick C1 protein; Intracellular cholesterol transporter which acts in concert with NPC2 and plays an important role in the egress of cholesterol from the endosomal/lysosomal compartment. Both NPC1 and NPC2 function as the cellular 'tag team duo' (TTD) to catalyze the mobilization of cholesterol within the multivesicular environment of the late endosome (LE) to effect egress through the lim…
MCL	7	Dark Golden Rod 2	22	NPC2	Epididymal secretory protein E1; Intracellular cholesterol transporter which acts in concert with NPC1 and plays an important role in the egress of cholesterol from the endosomal/lysosomal compartment. Both NPC1 and NPC2 function as the cellular 'tag team duo' (TTD) to catalyze the mobilization of cholesterol within the multivesicular environment of the late endosome (LE) to effect egress through…
MCL	7	Dark Golden Rod 2	22	PPT1	Palmitoyl-protein thioesterase 1; Removes thioester-linked fatty acyl groups such as palmitate from modified cysteine residues in proteins or peptides during lysosomal degradation. Prefers acyl chain lengths of 14 to 18 carbons; Belongs to the palmitoyl-protein thioesterase family
MCL	7	Dark Golden Rod 2	22	SCARB2	Lysosome membrane protein 2; Acts as a lysosomal receptor for glucosylceramidase (GBA) targeting; Belongs to the CD36 family
MCL	7	Dark Golden Rod 2	22	SGSH	N-sulphoglucosamine sulphohydrolase; Catalyzes a step in lysosomal heparan sulfate degradation; Belongs to the sulfatase family
MCL	7	Dark Golden Rod 2	22	SMPD1	Sphingomyelin phosphodiesterase; Converts sphingomyelin to ceramide. Also has phospholipase C activities toward 1,2-diacylglycerolphosphocholine and 1,2-diacylglycerolphosphoglycerol
MCL	7	Dark Golden Rod 2	22	TBCK	TBC domain-containing protein kinase-like protein; Involved in the modulation of mTOR signaling and expression of mTOR complex components. Involved in the regulation of cell proliferation and growth. Involved in the control of actin-cytoskeleton organization
MCL	8	Khaki	19	AQP2	Aquaporin-2; Forms a water-specific channel that provides the plasma membranes of renal collecting duct with high permeability to water, thereby permitting water to move in the direction of an osmotic gradient; Aquaporins
MCL	8	Khaki	19	BSND	Barttin (chloride channel ka/b beta subunit); Barttin; Functions as a beta-subunit for CLCNKA and CLCNKB chloride channels. In the kidney CLCNK/BSND heteromers mediate chloride reabsorption by facilitating its basolateral efflux. In the stria, CLCNK/BSND channels drive potassium secretion by recycling chloride for the basolateral SLC12A2 cotransporter
MCL	8	Khaki	19	DUOX2	Dual oxidase 2; Generates hydrogen peroxide which is required for the activity of thyroid peroxidase/TPO and lactoperoxidase/LPO. Plays a role in thyroid hormones synthesis and lactoperoxidase-mediated antimicrobial defense at the surface of mucosa. May have its own peroxidase activity through its N-terminal peroxidase-like domain
MCL	8	Khaki	19	FOXE1	Forkhead box protein E1; Transcription factor that binds consensus sites on a variety of gene promoters and activate their transcription. Involved in proper palate formation, most probably through the expression of MSX1 and TGFB3 genes which are direct targets of this transcription factor. Also implicated in thyroid gland morphogenesis. May indirectly play a role in cell growth and migration thro…
MCL	8	Khaki	19	GJB1	Gap junction beta-1 protein; One gap junction consists of a cluster of closely packed pairs of transmembrane channels, the connexons, through which materials of low MW diffuse from one cell to a neighboring cell
MCL	8	Khaki	19	GJB2	Gap junction beta-2 protein; One gap junction consists of a cluster of closely packed pairs of transmembrane channels, the connexons, through which materials of low MW diffuse from one cell to a neighboring cell; Deafness associated genes
MCL	8	Khaki	19	GJB6	Gap junction beta-6 protein; One gap junction consists of a cluster of closely packed pairs of transmembrane channels, the connexons, through which materials of low MW diffuse from one cell to a neighboring cell; Belongs to the connexin family. Beta-type (group I) subfamily
MCL	8	Khaki	19	HAX1	HCLS1-associated protein X-1; Recruits the Arp2/3 complex to the cell cortex and regulates reorganization of the cortical actin cytoskeleton via its interaction with KCNC3 and the Arp2/3 complex. Slows down the rate of inactivation of KCNC3 channels. Promotes GNA13-mediated cell migration. Involved in the clathrin-mediated endocytosis pathway. May be involved in internalization of ABC transporter…
MCL	8	Khaki	19	KCNJ1	ATP-sensitive inward rectifier potassium channel 1; In the kidney, probably plays a major role in potassium homeostasis. Inward rectifier potassium channels are characterized by a greater tendency to allow potassium to flow into the cell rather than out of it. Their voltage dependence is regulated by the concentration of extracellular potassium; as external potassium is raised, the voltage range …
MCL	8	Khaki	19	LYST	Lysosomal-trafficking regulator; May be required for sorting endosomal resident proteins into late multivesicular endosomes by a mechanism involving microtubules; BEACH domain containing
MCL	8	Khaki	19	MASP1	Mannan binding lectin serine peptidase 1
MCL	8	Khaki	19	PAH	Phenylalanine-4-hydroxylase; Catalyzes the hydroxylation of L-phenylalanine to L-tyrosine
MCL	8	Khaki	19	SLC12A1	Solute carrier family 12 member 1; Electrically silent transporter system. Mediates sodium and chloride reabsorption. Plays a vital role in the regulation of ionic balance and cell volume; Belongs to the SLC12A transporter family
MCL	8	Khaki	19	SLC26A4	Solute carrier family 26 (sodium-independent chloride/iodide transporter), member 4; Pendrin; Sodium-independent transporter of chloride and iodide; Belongs to the SLC26A/SulP transporter (TC 2.A.53) family
MCL	8	Khaki	19	SLC2A1	Solute carrier family 2, facilitated glucose transporter member 1; Facilitative glucose transporter. This isoform may be responsible for constitutive or basal glucose uptake. Has a very broad substrate specificity; can transport a wide range of aldoses including both pentoses and hexoses; Belongs to the major facilitator superfamily. Sugar transporter (TC 2.A.1.1) family. Glucose transporter subf…
MCL	8	Khaki	19	TG	Thyroglobulin; Precursor of the iodinated thyroid hormones thyroxine (T4) and triiodothyronine (T3); Belongs to the type-B carboxylesterase/lipase family
MCL	8	Khaki	19	TPO	Thyroid peroxidase; Iodination and coupling of the hormonogenic tyrosines in thyroglobulin to yield the thyroid hormones T(3) and T(4); Belongs to the peroxidase family. XPO subfamily
MCL	8	Khaki	19	TSHR	Thyrotropin receptor; Receptor for the thyroid-stimulating hormone (TSH) or thyrotropin. Also acts as a receptor for the heterodimeric glycoprotein hormone (GPHA2:GPHB5) or thyrostimulin. The activity of this receptor is mediated by G proteins which activate adenylate cyclase. Plays a central role in controlling thyroid cell metabolism (By similarity); Belongs to the G-protein coupled receptor 1 …
MCL	8	Khaki	19	VPS13B	Vacuolar protein sorting-associated protein 13B; May be involved in protein sorting in post Golgi membrane traffic; Belongs to the VPS13 family
MCL	9	Olive	17	ADCK3	Atypical kinase COQ8A, mitochondrial; Atypical kinase involved in the biosynthesis of coenzyme Q, also named ubiquinone, an essential lipid-soluble electron transporter for aerobic cellular respiration. Its substrate specificity is unclear: does not show any protein kinase activity. Probably acts as a small molecule kinase, possibly a lipid kinase that phosphorylates a prenyl lipid in the ubiquin…
MCL	9	Olive	17	ANO10	Anoctamin-10; Does not exhibit calcium-activated chloride channel (CaCC) activity. Can inhibit the activity of ANO1; Belongs to the anoctamin family
MCL	9	Olive	17	AP4S1	AP-4 complex subunit sigma-1; Component of the adaptor protein complex 4 (AP-4). Adaptor protein complexes are vesicle coat components involved both in vesicle formation and cargo selection. They control the vesicular transport of proteins in different trafficking pathways. AP-4 forms a non clathrin- associated coat on vesicles departing the trans-Golgi network (TGN) and may be involved in the ta…
MCL	9	Olive	17	AP5Z1	AP-5 complex subunit zeta-1; As part of AP-5, a probable fifth adaptor protein complex it may be involved in endosomal transport. According to it is a putative helicase required for efficient homologous recombination DNA double-strand break repair; Armadillo-like helical domain containing
MCL	9	Olive	17	C12orf65	Probable peptide chain release factor C12orf65, mitochondrial; May act as a codon-independent translation release factor that has lost all stop codon specificity and directs the termination of translation in mitochondrion. May help rescuing stalled mitoribosomes during translation (By similarity)
MCL	9	Olive	17	DNAJC6	Dnaj heat shock protein family (hsp40) member c6; Putative tyrosine-protein phosphatase auxilin; Recruits HSPA8/HSC70 to clathrin-coated vesicles and promotes uncoating of clathrin-coated vesicles. Plays a role in clathrin-mediated endocytosis in neurons (By similarity); C2 tensin-type domain containing
MCL	9	Olive	17	KIF1A	Kinesin-like protein KIF1A; Motor for anterograde axonal transport of synaptic vesicle precursors; Belongs to the TRAFAC class myosin-kinesin ATPase superfamily. Kinesin family. Unc-104 subfamily
MCL	9	Olive	17	KIF1C	Kinesin-like protein KIF1C; Motor required for the retrograde transport of Golgi vesicles to the endoplasmic reticulum. Has a microtubule plus end- directed motility; Kinesins
MCL	9	Olive	17	MAPK8IP3	Mitogen-activated protein kinase 8 interacting protein 3; C-Jun-amino-terminal kinase-interacting protein 3; The JNK-interacting protein (JIP) group of scaffold proteins selectively mediates JNK signaling by aggregating specific components of the MAPK cascade to form a functional JNK signaling module. May function as a regulator of vesicle transport, through interactions with the JNK-signaling co…
MCL	9	Olive	17	PLA2G6	85/88 kDa calcium-independent phospholipase A2; Catalyzes the release of fatty acids from phospholipids. It has been implicated in normal phospholipid remodeling, nitric oxide-induced or vasopressin-induced arachidonic acid release and in leukotriene and prostaglandin production. May participate in fas mediated apoptosis and in regulating transmembrane ion flux in glucose-stimulated B-cells. Has …
MCL	9	Olive	17	SACS	Sacsin; Co-chaperone which acts as a regulator of the Hsp70 chaperone machinery and may be involved in the processing of other ataxia-linked proteins; DNAJ heat shock proteins
MCL	9	Olive	17	SLC12A6	Solute carrier family 12 member 6; Mediates electroneutral potassium-chloride cotransport. May be activated by cell swelling. May contribute to cell volume homeostasis in single cells; Belongs to the SLC12A transporter family
MCL	9	Olive	17	SPG11	SPG11, spatacsin vesicle trafficking associated; Spatacsin; May play a role in neurite plasticity by maintaining cytoskeleton stability and regulating synaptic vesicle transport
MCL	9	Olive	17	SPG7	Paraplegin; ATP-dependent zinc metalloprotease. Plays a role in the formation and regulation of the mitochondrial permeability transition pore (mPTP) and its proteolytic activity is dispensable for this function; In the N-terminal section; belongs to the AAA ATPase family
MCL	9	Olive	17	TTC19	Tetratricopeptide repeat protein 19, mitochondrial; Required for the preservation of the structural and functional integrity of mitochondrial respiratory complex III by allowing the physiological turnover of the Rieske protein UQCRFS1. Involved in the clearance of UQCRFS1 N-terminal fragments, which are produced upon incorporation of UQCRFS1 into the complex III and whose presence is detrimental …
MCL	9	Olive	17	WDR45	WD repeat domain phosphoinositide-interacting protein 4; Plays an important role in the autophagy pathway, which is the major intracellular degradation system by which cytoplasmic materials are packaged into autophagosomes and delivered to lysosomes for degradation; Belongs to the WD repeat SVP1 family
MCL	9	Olive	17	ZFYVE26	Zinc finger FYVE domain-containing protein 26; Phosphatidylinositol 3-phosphate-binding protein required for the abcission step in cytokinesis: recruited to the midbody during cytokinesis and acts as a regulator of abcission. May also be required for efficient homologous recombination DNA double-strand break repair; Zinc fingers FYVE-type
MCL	10	Green	15	ADA	Adenosine deaminase; Catalyzes the hydrolytic deamination of adenosine and 2- deoxyadenosine. Plays an important role in purine metabolism and in adenosine homeostasis. Modulates signaling by extracellular adenosine, and so contributes indirectly to cellular signaling events. Acts as a positive regulator of T-cell coactivation, by binding DPP4. Its interaction with DPP4 regulates lymphocyte- epit…
MCL	10	Green	15	ADAR	Double-stranded RNA-specific adenosine deaminase; Catalyzes the hydrolytic deamination of adenosine to inosine in double-stranded RNA (dsRNA) referred to as A-to-I RNA editing. This may affect gene expression and function in a number of ways that include mRNA translation by changing codons and hence the amino acid sequence of proteins; pre-mRNA splicing by altering splice site recognition sequenc…
MCL	10	Green	15	EFTUD2	116 kDa U5 small nuclear ribonucleoprotein component; Component of the U5 snRNP and the U4/U6-U5 tri-snRNP complex required for pre-mRNA splicing. Binds GTP; Belongs to the TRAFAC class translation factor GTPase superfamily. Classic translation factor GTPase family. EF-G/EF-2 subfamily
MCL	10	Green	15	GAMT	Guanidinoacetate N-methyltransferase; Converts guanidinoacetate to creatine, using S- adenosylmethionine as the methyl donor. Important in nervous system development; Belongs to the class I-like SAM-binding methyltransferase superfamily. RMT2 methyltransferase family
MCL	10	Green	15	IFIH1	Interferon-induced helicase C domain-containing protein 1; Innate immune receptor which acts as a cytoplasmic sensor of viral nucleic acids and plays a major role in sensing viral infection and in the activation of a cascade of antiviral responses including the induction of type I interferons and proinflammatory cytokines. Its ligands include mRNA lacking 2'-O- methylation at their 5' cap and lon…
MCL	10	Green	15	LARP7	La-related protein 7; Negative transcriptional regulator of polymerase II genes, acting by means of the 7SK RNP system. Within the 7SK RNP complex, the positive transcription elongation factor b (P-TEFb) is sequestered in an inactive form, preventing RNA polymerase II phosphorylation and subsequent transcriptional elongation; La ribonucleoprotein domain containing
MCL	10	Green	15	NBAS	Neuroblastoma-amplified sequence; Involved in Golgi-to-endoplasmic reticulum (ER) retrograde transport; the function is proposed to depend on its association in the NRZ complex which is believed to play a role in SNARE assembly at the ER
MCL	10	Green	15	OCA2	OCA2 melanosomal transmembrane protein; P protein; Could be involved in the transport of tyrosine, the precursor to melanin synthesis, within the melanocyte. Regulates the pH of melanosome and the melanosome maturation. One of the components of the mammalian pigmentary system. Seems to regulate the post-translational processing of tyrosinase, which catalyzes the limiting reaction in melanin synth…
MCL	10	Green	15	PSMB8	Proteasome subunit beta type-8; The proteasome is a multicatalytic proteinase complex which is characterized by its ability to cleave peptides with Arg, Phe, Tyr, Leu, and Glu adjacent to the leaving group at neutral or slightly basic pH. The proteasome has an ATP-dependent proteolytic activity. This subunit is involved in antigen processing to generate class I binding peptides. Replacement of PS…
MCL	10	Green	15	RBM8A	RNA-binding protein 8A; Core component of the splicing-dependent multiprotein exon junction complex (EJC) deposited at splice junctions on mRNAs. The EJC is a dynamic structure consisting of core proteins and several peripheral nuclear and cytoplasmic associated factors that join the complex only transiently either during EJC assembly or during subsequent mRNA metabolism. The EJC marks the positi…
MCL	10	Green	15	RNASEH2B	Ribonuclease H2 subunit B; Non catalytic subunit of RNase H2, an endonuclease that specifically degrades the RNA of RNA:DNA hybrids. Participates in DNA replication, possibly by mediating the removal of lagging- strand Okazaki fragment RNA primers during DNA replication. Mediates the excision of single ribonucleotides from DNA:RNA duplexes
MCL	10	Green	15	RPS19	40S ribosomal protein S19; Required for pre-rRNA processing and maturation of 40S ribosomal subunits; Belongs to the eukaryotic ribosomal protein eS19 family
MCL	10	Green	15	THOC6	THO complex subunit 6 homolog; Acts as component of the THO subcomplex of the TREX complex which is thought to couple mRNA transcription, processing and nuclear export, and which specifically associates with spliced mRNA and not with unspliced pre-mRNA. TREX is recruited to spliced mRNAs by a transcription-independent mechanism, binds to mRNA upstream of the exon-junction complex (EJC) and is rec…
MCL	10	Green	15	TREX1	Three-prime repair exonuclease 1; Major cellular 3'-to-5' DNA exonuclease which digests single-stranded DNA (ssDNA) and double-stranded DNA (dsDNA) with mismatched 3' termini. Prevents cell-intrinsic initiation of autoimmunity. Acts by metabolizing DNA fragments from endogenous retroelements, including L1, LTR and SINE elements. Unless degraded, these DNA fragments accumulate in the cytosol and a…
MCL	10	Green	15	UPF1	Regulator of nonsense transcripts 1; RNA-dependent helicase and ATPase required for nonsense- mediated decay (NMD) of mRNAs containing premature stop codons. Is recruited to mRNAs upon translation termination and undergoes a cycle of phosphorylation and dephosphorylation; its phosphorylation appears to be a key step in NMD. Recruited by release factors to stalled ribosomes together with the SMG1C…
MCL	11	Cyan	15	DNM1L	Dynamin-1-like protein; Functions in mitochondrial and peroxisomal division. Mediates membrane fission through oligomerization into membrane- associated tubular structures that wrap around the scission site to constrict and sever the mitochondrial membrane through a GTP hydrolysis-dependent mechanism. Through its function in mitochondrial division, ensures the survival of at least some types of p…
MCL	11	Cyan	15	MFN2	Mitofusin-2; Mitochondrial outer membrane GTPase that mediates mitochondrial clustering and fusion. Mitochondria are highly dynamic organelles, and their morphology is determined by the equilibrium between mitochondrial fusion and fission events. Overexpression induces the formation of mitochondrial networks. Membrane clustering requires GTPase activity and may involve a major rearrangement of th…
MCL	11	Cyan	15	MOCS2	Molybdopterin synthase catalytic subunit; Catalytic subunit of the molybdopterin synthase complex, a complex that catalyzes the conversion of precursor Z into molybdopterin. Acts by mediating the incorporation of 2 sulfur atoms from thiocarboxylated MOCS2A into precursor Z to generate a dithiolene group; Belongs to the MoaE family. MOCS2B subfamily
MCL	11	Cyan	15	OPA1	Dynamin-like 120 kDa protein, mitochondrial; Dynamin-related GTPase that is essential for normal mitochondrial morphology by regulating the equilibrium between mitochondrial fusion and mitochondrial fission. Coexpression of isoform 1 with shorter alternative products is required for optimal activity in promoting mitochondrial fusion. Binds lipid membranes enriched in negatively charged phospholip…
MCL	11	Cyan	15	PARK2	E3 ubiquitin-protein ligase parkin; Functions within a multiprotein E3 ubiquitin ligase complex, catalyzing the covalent attachment of ubiquitin moieties onto substrate proteins, such as BCL2, SYT11, CCNE1, GPR37, RHOT1/MIRO1, MFN1, MFN2, STUB1, SNCAIP, SEPT5, TOMM20, USP30, ZNF746 and AIMP2. Mediates monoubiquitination as well as 'Lys-6', 'Lys-11', 'Lys-48'-linked and 'Lys-63'-linked polyubiquit…
MCL	11	Cyan	15	PEX1	Peroxisomal biogenesis factor 1; Peroxisome biogenesis factor 1; Required for stability of PEX5 and protein import into the peroxisome matrix. Anchored by PEX26 to peroxisome membranes, possibly to form heteromeric AAA ATPase complexes required for the import of proteins into peroxisomes
MCL	11	Cyan	15	PEX10	Peroxisome biogenesis factor 10; Somewhat implicated in the biogenesis of peroxisomes; Peroxins
MCL	11	Cyan	15	PEX11B	Peroxisomal membrane protein 11B; Involved in peroxisomal proliferation. May regulate peroxisome division by recruiting the dynamin-related GTPase DNM1L to the peroxisomal membrane. Promotes membrane protrusion and elongation on the peroxisomal surface; Belongs to the peroxin-11 family
MCL	11	Cyan	15	PEX16	Peroxisomal membrane protein PEX16; Required for peroxisome membrane biogenesis. May play a role in early stages of peroxisome assembly. Can recruit other peroxisomal proteins, such as PEX3 and PMP34, to de novo peroxisomes derived from the endoplasmic reticulum (ER). May function as receptor for PEX3; Belongs to the peroxin-16 family
MCL	11	Cyan	15	PEX6	Peroxisomal biogenesis factor 6; Peroxisome assembly factor 2; Involved in peroxisome biosynthesis. Required for stability of the PTS1 receptor. Anchored by PEX26 to peroxisome membranes, possibly to form heteromeric AAA ATPase complexes required for the import of proteins into peroxisomes
MCL	11	Cyan	15	PHYH	Phytanoyl-CoA dioxygenase, peroxisomal; Converts phytanoyl-CoA to 2-hydroxyphytanoyl-CoA
MCL	11	Cyan	15	PMP22	Peripheral myelin protein 22; Might be involved in growth regulation, and in myelinization in the peripheral nervous system; Belongs to the PMP-22/EMP/MP20 family
MCL	11	Cyan	15	PTPN23	Tyrosine-protein phosphatase non-receptor type 23; Plays a role in sorting of endocytic ubiquitinated cargos into multivesicular bodies (MVBs) via its interaction with the ESCRT-I complex (endosomal sorting complex required for transport I), and possibly also other ESCRT complexes. May act as a negative regulator of Ras-mediated mitogenic activity. Plays a role in ciliogenesis; Protein tyrosine p…
MCL	11	Cyan	15	SLC25A46	Solute carrier family 25 member 46; May play a role in mitochondrial dynamics by controlling mitochondrial membrane fission; Belongs to the mitochondrial carrier (TC 2.A.29) family
MCL	11	Cyan	15	UBA5	Ubiquitin-like modifier-activating enzyme 5; E1-like enzyme which activates UFM1 and SUMO2; Ubiquitin like modifier activating enzymes
MCL	12	Aquamarine	14	ALG1	Chitobiosyldiphosphodolichol beta-mannosyltransferase; Participates in the formation of the lipid-linked precursor oligosaccharide for N-glycosylation. Involved in assembling the dolichol-pyrophosphate-GlcNAc(2)-Man(5) intermediate on the cytoplasmic surface of the ER; Belongs to the glycosyltransferase group 1 family. Glycosyltransferase 33 subfamily
MCL	12	Aquamarine	14	ALG12	Dol-P-Man:Man(7)GlcNAc(2)-PP-Dol alpha-1,6-mannosyltransferase; Adds the eighth mannose residue in an alpha-1,6 linkage onto the dolichol-PP-oligosaccharide precursor (dolichol-PP- Man(7)GlcNAc(2)) required for protein glycosylation; Belongs to the glycosyltransferase 22 family
MCL	12	Aquamarine	14	ALG14	UDP-N-acetylglucosamine transferase subunit ALG14 homolog; May be involved in protein N-glycosylation. May play a role in the second step of the dolichol-linked oligosaccharide pathway. May anchor the catalytic subunit ALG13 to the ER; Belongs to the ALG14 family
MCL	12	Aquamarine	14	ALG6	Dolichyl pyrophosphate Man9GlcNAc2 alpha-1,3-glucosyltransferase; Adds the first glucose residue to the lipid-linked oligosaccharide precursor for N-linked glycosylation. Transfers glucose from dolichyl phosphate glucose (Dol-P-Glc) onto the lipid-linked oligosaccharide Man(9)GlcNAc(2)-PP-Dol; Alpha-1,3-glucosyltransferases
MCL	12	Aquamarine	14	ARV1	ARV1 homolog, fatty acid homeostasis modulator; Protein ARV1; Plays a role as a mediator in the endoplasmic reticulum (ER) cholesterol and bile acid homeostasis. Participates in sterol transport out of the ER and distribution into plasma membranes
MCL	12	Aquamarine	14	CNOT3	CCR4-NOT transcription complex subunit 3; Component of the CCR4-NOT complex which is one of the major cellular mRNA deadenylases and is linked to various cellular processes including bulk mRNA degradation, miRNA-mediated repression, translational repression during translational initiation and general transcription regulation. Additional complex functions may be a consequence of its influence on m…
MCL	12	Aquamarine	14	GALT	UDPglucose--hexose-1-phosphate uridylyltransferase; Galactose-1-phosphate uridylyltransferase; Plays an important role in galactose metabolism
MCL	12	Aquamarine	14	GMPPB	Mannose-1-phosphate guanyltransferase beta; Catalyzes the formation of GDP-mannose, an essential precursor of glycan moieties of glycoproteins and glycolipids; Belongs to the transferase hexapeptide repeat family
MCL	12	Aquamarine	14	GNE	Bifunctional UDP-N-acetylglucosamine 2-epimerase/N-acetylmannosamine kinase; Regulates and initiates biosynthesis of N- acetylneuraminic acid (NeuAc), a precursor of sialic acids. Plays an essential role in early development (By similarity). Required for normal sialylation in hematopoietic cells. Sialylation is implicated in cell adhesion, signal transduction, tumorigenicity and metastatic behavi…
MCL	12	Aquamarine	14	MPI	Mannose-6-phosphate isomerase; Involved in the synthesis of the GDP-mannose and dolichol-phosphate-mannose required for a number of critical mannosyl transfer reactions; Belongs to the mannose-6-phosphate isomerase type 1 family
MCL	12	Aquamarine	14	PMM2	Phosphomannomutase 2; Involved in the synthesis of the GDP-mannose and dolichol-phosphate-mannose required for a number of critical mannosyl transfer reactions; HAD Asp-based non-protein phosphatases
MCL	12	Aquamarine	14	SLC35A1	Solute carrier family 35 (udp-sugar transporter), member a1/2/3; CMP-sialic acid transporter; Transports CMP-sialic acid from the cytosol into Golgi vesicles where glycosyltransferases function; Belongs to the nucleotide-sugar transporter family. SLC35A subfamily
MCL	12	Aquamarine	14	TGDS	dTDP-D-glucose 4,6-dehydratase; Short chain dehydrogenase/reductase superfamily
MCL	12	Aquamarine	14	TRAPPC11	Trafficking protein particle complex subunit 11; Involved in endoplasmic reticulum to Golgi apparatus trafficking at a very early stage; Trafficking protein particle complex
MCL	13	Sky Blue 2	13	APC	Adenomatous polyposis coli protein; Tumor suppressor. Promotes rapid degradation of CTNNB1 and participates in Wnt signaling as a negative regulator. APC activity is correlated with its phosphorylation state. Activates the GEF activity of SPATA13 and ARHGEF4. Plays a role in hepatocyte growth factor (HGF)-induced cell migration. Required for MMP9 up-regulation via the JNK signaling pathway in col…
MCL	13	Sky Blue 2	13	ARSE	Arylsulfatase E; May be essential for the correct composition of cartilage and bone matrix during development. Has no activity toward steroid sulfates; Sulfatases
MCL	13	Sky Blue 2	13	CYP24A1	1,25-dihydroxyvitamin D(3) 24-hydroxylase, mitochondrial; Has a role in maintaining calcium homeostasis. Catalyzes the NADPH-dependent 24-hydroxylation of calcidiol (25- hydroxyvitamin D(3)) and calcitriol (1-alpha,25-dihydroxyvitamin D(3)). The enzyme can perform up to 6 rounds of hydroxylation of calcitriol leading to calcitroic acid. It also shows 23- hydroxylating activity leading to 1-alpha,…
MCL	13	Sky Blue 2	13	CYP27A1	Sterol 26-hydroxylase, mitochondrial; Catalyzes the first step in the oxidation of the side chain of sterol intermediates; the 27-hydroxylation of 5-beta- cholestane-3-alpha,7-alpha,12-alpha-triol. Has also a vitamin D3- 25-hydroxylase activity; Belongs to the cytochrome P450 family
MCL	13	Sky Blue 2	13	DHCR7	7-dehydrocholesterol reductase; Production of cholesterol by reduction of C7-C8 double bond of 7-dehydrocholesterol (7-DHC); Belongs to the ERG4/ERG24 family
MCL	13	Sky Blue 2	13	EBP	3-beta-hydroxysteroid-Delta(8),Delta(7)-isomerase; Catalyzes the conversion of Delta(8)-sterols to their corresponding Delta(7)-isomers; Belongs to the EBP family
MCL	13	Sky Blue 2	13	LIPA	Lysosomal acid lipase/cholesteryl ester hydrolase; Crucial for the intracellular hydrolysis of cholesteryl esters and triglycerides that have been internalized via receptor- mediated endocytosis of lipoprotein particles. Important in mediating the effect of LDL (low density lipoprotein) uptake on suppression of hydroxymethylglutaryl-CoA reductase and activation of endogenous cellular cholesteryl …
MCL	13	Sky Blue 2	13	LRP5	Low-density lipoprotein receptor-related protein 5; Component of the Wnt-Fzd-LRP5-LRP6 complex that triggers beta-catenin signaling through inducing aggregation of receptor- ligand complexes into ribosome-sized signalsomes. Cell-surface coreceptor of Wnt/beta-catenin signaling, which plays a pivotal role in bone formation. Plays a role in norrin (NDP) signal transduction. The Wnt-induced Fzd/LRP6…
MCL	13	Sky Blue 2	13	MVK	Mevalonate kinase; May be a regulatory site in cholesterol biosynthetic pathway; Belongs to the GHMP kinase family. Mevalonate kinase subfamily
MCL	13	Sky Blue 2	13	PPP2R5D	Serine/threonine-protein phosphatase 2A 56 kDa regulatory subunit delta isoform; The B regulatory subunit might modulate substrate selectivity and catalytic activity, and also might direct the localization of the catalytic enzyme to a particular subcellular compartment; Belongs to the phosphatase 2A regulatory subunit B56 family
MCL	13	Sky Blue 2	13	RCBTB1	RCC1 and BTB domain-containing protein 1; May be involved in cell cycle regulation by chromatin remodeling; BTB domain containing
MCL	13	Sky Blue 2	13	STAR	Steroidogenic acute regulatory protein, mitochondrial; Plays a key role in steroid hormone synthesis by enhancing the metabolism of cholesterol into pregnenolone. Mediates the transfer of cholesterol from the outer mitochondrial membrane to the inner mitochondrial membrane where it is cleaved to pregnenolone; StAR related lipid transfer domain containing
MCL	13	Sky Blue 2	13	ZNF408	Zinc finger protein 408; May be involved in transcriptional regulation; PR/SET domain family
MCL	14	Sky Blue	7	LEMD3	Inner nuclear membrane protein Man1; Can function as a specific repressor of TGF-beta, activin, and BMP signaling through its interaction with the R-SMAD proteins. Antagonizes TGF-beta-induced cell proliferation arrest; LEM domain containing
MCL	14	Sky Blue	7	PGAP3	Post-GPI attachment to proteins factor 3; Involved in the lipid remodeling steps of GPI-anchor maturation. Lipid remodeling steps consist in the generation of 2 saturated fatty chains at the sn-2 position of GPI-anchors proteins. Required for phospholipase A2 activity that removes an acyl-chain at the sn-2 position of GPI-anchors during the remodeling of GPI (Probable); Belongs to the PGAP3 family
MCL	14	Sky Blue	7	PIGA	Phosphatidylinositol N-acetylglucosaminyltransferase subunit A; Necessary for the synthesis of N-acetylglucosaminyl- phosphatidylinositol, the very early intermediate in GPI-anchor biosynthesis; Belongs to the glycosyltransferase group 1 family. Glycosyltransferase 4 subfamily
MCL	14	Sky Blue	7	PIGL	N-acetylglucosaminyl-phosphatidylinositol de-N-acetylase; Involved in the second step of GPI biosynthesis. De-N- acetylation of N-acetylglucosaminyl-phosphatidylinositol; Belongs to the PIGL family
MCL	14	Sky Blue	7	PIGN	GPI ethanolamine phosphate transferase 1; Ethanolamine phosphate transferase involved in glycosylphosphatidylinositol-anchor biosynthesis. Transfers ethanolamine phosphate to the first alpha-1,4-linked mannose of the glycosylphosphatidylinositol precursor of GPI-anchor (By similarity). May act as suppressor of replication stress and chromosome missegregation; Belongs to the PIGG/PIGN/PIGO family.…
MCL	14	Sky Blue	7	PIGQ	Phosphatidylinositol N-acetylglucosaminyltransferase subunit Q; Part of the complex catalyzing the transfer of N- acetylglucosamine from UDP-N-acetylglucosamine to phosphatidylinositol, the first step of GPI biosynthesis; Belongs to the PIGQ family
MCL	14	Sky Blue	7	PIGV	GPI mannosyltransferase 2; Alpha-1,6-mannosyltransferase involved in glycosylphosphatidylinositol-anchor biosynthesis. Transfers the second mannose to the glycosylphosphatidylinositol during GPI precursor assembly; Dolichyl D-mannosyl phosphate dependent mannosyltransferases
MCL	15	Sky Blue 3	7	CPA6	Carboxypeptidase A6; May be involved in the proteolytic inactivation of enkephalins and neurotensin in some brain areas. May convert inactive angiotensin I into the biologically active angiotensin II. Releases a C-terminal amino acid, with preference for large hydrophobic C-terminal amino acids and shows only very weak activity toward small amino acids and histidine; M14 carboxypeptidases
MCL	15	Sky Blue 3	7	MMAA	Methylmalonic aciduria type A protein, mitochondrial; GTPase, binds and hydrolyzes GTP. Involved in intracellular vitamin B12 metabolism, mediates the transport of cobalamin (Cbl) into mitochondria for the final steps of adenosylcobalamin (AdoCbl) synthesis. Functions as a G-protein chaperone that assists AdoCbl cofactor delivery from MMAB to the methylmalonyl-CoA mutase (MUT) and reactivation of…
MCL	15	Sky Blue 3	7	MMAB	Cob(I)yrinic acid a,c-diamide adenosyltransferase, mitochondrial; Adenosyltransferase involved in intracellular vitamin B12 metabolism. Generates adenosylcobalamin (AdoCbl) and directly delivers the cofactor to MUT in a transfer taht is stimulated by ATP-binding to MMAB and gated by MMAA; Cilia and flagella associated
MCL	15	Sky Blue 3	7	MMACHC	Cyanocobalamin reductase (cyanide-eliminating) / alkylcobalamin dealkylase; Methylmalonic aciduria and homocystinuria type C protein; Catalyzes the reductive dealkylation of cyanocobalamin to cob(II)alamin, using FAD or FMN as cofactor and NADPH as cosubstrate. Can also catalyze the glutathione-dependent reductive demethylation of methylcobalamin, and, with much lower efficiency, the glutathione-…
MCL	15	Sky Blue 3	7	MUT	Methylmalonyl-CoA mutase, mitochondrial; Involved in the degradation of several amino acids, odd- chain fatty acids and cholesterol via propionyl-CoA to the tricarboxylic acid cycle. MCM has different functions in other species; Belongs to the methylmalonyl-CoA mutase family
MCL	15	Sky Blue 3	7	SPR	Sepiapterin reductase; Catalyzes the final one or two reductions in tetra- hydrobiopterin biosynthesis to form 5,6,7,8-tetrahydrobiopterin; Belongs to the sepiapterin reductase family
MCL	15	Sky Blue 3	7	TCN2	Transcobalamin-2; Primary vitamin B12-binding and transport protein. Delivers cobalamin to cells; Belongs to the eukaryotic cobalamin transport proteins family
MCL	16	Cornflower Blue	6	AGA	N(4)-(beta-N-acetylglucosaminyl)-L-asparaginase; Cleaves the GlcNAc-Asn bond which joins oligosaccharides to the peptide of asparagine-linked glycoproteins; Belongs to the Ntn-hydrolase family
MCL	16	Cornflower Blue	6	B3GALTL	Udp-glucose:o-linked fucose beta-1,3-glucosyltransferase; Beta-1,3-glucosyltransferase; O-glucosyltransferase that transfers glucose toward fucose with a beta-1,3 linkage. Specifically glucosylates O-linked fucosylglycan on TSP type-1 domains of proteins, thereby contributing to elongation of O-fucosylglycan
MCL	16	Cornflower Blue	6	HEXA	Beta-hexosaminidase subunit alpha; Responsible for the degradation of GM2 gangliosides, and a variety of other molecules containing terminal N-acetyl hexosamines, in the brain and other tissues. The form B is active against certain oligosaccharides. The form S has no measurable activity; Belongs to the glycosyl hydrolase 20 family
MCL	16	Cornflower Blue	6	HEXB	Beta-hexosaminidase subunit beta; Responsible for the degradation of GM2 gangliosides, and a variety of other molecules containing terminal N-acetyl hexosamines, in the brain and other tissues; Belongs to the glycosyl hydrolase 20 family
MCL	16	Cornflower Blue	6	NAGA	Alpha-N-acetylgalactosaminidase; Removes terminal alpha-N-acetylgalactosamine residues from glycolipids and glycopeptides. Required for the breakdown of glycolipids
MCL	16	Cornflower Blue	6	ST3GAL5	Lactosylceramide alpha-2,3-sialyltransferase; Catalyzes the formation of ganglioside GM3 (alpha-N- acetylneuraminyl-2,3-beta-D-galactosyl-1, 4-beta-D- glucosylceramide); Sialyltransferases
MCL	17	Blue	4	PREPL	Prolyl endopeptidase-like; Probable serine peptidase whose precise substrate specificity remains unclear. Does not cleave peptides after a arginine or lysine residue. May play a role in the regulation of synaptic vesiscle exocytosis
MCL	17	Blue	4	SLC36A2	Proton-coupled amino acid transporter 2; Involved in a pH-dependent electrogenic neuronal transport and sequestration of small amino acids. Transports glycine and proline. Inhibited by sarcosine (By similarity); Belongs to the amino acid/polyamine transporter 2 family
MCL	17	Blue	4	SLC3A1	Neutral and basic amino acid transport protein rBAT; Involved in the high-affinity, sodium-independent transport of cystine and neutral and dibasic amino acids (system B(0,+)-like activity). May function as an activator of SLC7A9 and be involved in the high-affinity reabsorption of cystine in the kidney tubule; Solute carriers
MCL	17	Blue	4	SLC6A19	Sodium-dependent neutral amino acid transporter B(0)AT1; Transporter that mediates resorption of neutral amino acids across the apical membrane of renal and intestinal epithelial cells. This uptake is sodium-dependent and chloride- independent; Belongs to the sodium:neurotransmitter symporter (SNF) (TC 2.A.22) family. SLC6A19 subfamily
MCL	18	Medium Slate Blue	4	ABCB7	ATP-binding cassette sub-family B member 7, mitochondrial; Could be involved in the transport of heme from the mitochondria to the cytosol. Plays a central role in the maturation of cytosolic iron-sulfur (Fe/S) cluster-containing proteins; ATP binding cassette subfamily B
MCL	18	Medium Slate Blue	4	FLVCR1	Feline leukemia virus subgroup C receptor-related protein 1; Isoform 1: Heme transporter that exports cytoplasmic heme. It can also export coproporphyrin and protoporphyrin IX, which are both intermediate products in the heme biosynthetic pathway. Does not export bilirubin. Heme export depends on the presence of HPX and is required to maintain intracellular free heme balance, protecting cells fro…
MCL	18	Medium Slate Blue	4	GFER	Growth factor, augmenter of liver regeneration; FAD-linked sulfhydryl oxidase ALR; Isoform 1: FAD-dependent sulfhydryl oxidase that regenerates the redox-active disulfide bonds in CHCHD4/MIA40, a chaperone essential for disulfide bond formation and protein folding in the mitochondrial intermembrane space. The reduced form of CHCHD4/MIA40 forms a transient intermolecular disulfide bridge with GFER…
MCL	18	Medium Slate Blue	4	PPOX	Protoporphyrinogen/coproporphyrinogen iii oxidase; Protoporphyrinogen oxidase; Catalyzes the 6-electron oxidation of protoporphyrinogen-IX to form protoporphyrin-IX
MCL	19	Purple	4	CSNK2A1	Casein kinase II subunit alpha; Catalytic subunit of a constitutively active serine/threonine-protein kinase complex that phosphorylates a large number of substrates containing acidic residues C-terminal to the phosphorylated serine or threonine. Regulates numerous cellular processes, such as cell cycle progression, apoptosis and transcription, as well as viral infection. May act as a regulatory …
MCL	19	Purple	4	PACS1	Phosphofurin acidic cluster sorting protein 1; Coat protein that is involved in the localization of trans-Golgi network (TGN) membrane proteins that contain acidic cluster sorting motifs. Controls the endosome-to-Golgi trafficking of furin and mannose-6-phosphate receptor by connecting the acidic-cluster-containing cytoplasmic domain of these molecules with the adapter-protein complex-1 (AP-1) of…
MCL	19	Purple	4	PACS2	Phosphofurin acidic cluster sorting protein 2; Multifunctional sorting protein that controls the endoplasmic reticulum (ER)-mitochondria communication, including the apposition of mitochondria with the ER and ER homeostasis. In addition, in response to apoptic inducer, translocates BIB to mitochondria, which initiates a sequence of events including the formation of mitochondrial truncated BID, th…
MCL	19	Purple	4	WDR37	WD repeat-containing protein 37; WD repeat domain containing
MCL	20	Medium Purple	3	HNRNPU	Heterogeneous nuclear ribonucleoprotein U; DNA- and RNA-binding protein involved in several cellular processes such as nuclear chromatin organization, telomere-length regulation, transcription, mRNA alternative splicing and stability, Xist-mediated transcriptional silencing and mitotic cell progression. Plays a role in the regulation of interphase large-scale gene-rich chromatin organization thro…
MCL	20	Medium Purple	3	KRT81	Keratin, type II cuticular Hb1; Keratins, type II
MCL	20	Medium Purple	3	KRT86	Keratin, type II cuticular Hb6; Keratins, type II
MCL	21	Medium Purple 2	3	FXR1	Fragile X mental retardation syndrome-related protein 1; RNA-binding protein required for embryonic and postnatal development of muscle tissue. May regulate intracellular transport and local translation of certain mRNAs (By similarity); Belongs to the FMR1 family
MCL	21	Medium Purple 2	3	GNPTAB	N-acetylglucosamine-1-phosphotransferase subunits alpha/beta; Catalyzes the formation of mannose 6-phosphate (M6P) markers on high mannose type oligosaccharides in the Golgi apparatus. M6P residues are required to bind to the M6P receptors (MPR), which mediate the vesicular transport of lysosomal enzymes to the endosomal/prelysosomal compartment; EF-hand domain containing
MCL	21	Medium Purple 2	3	PURA	Transcriptional activator protein Pur-alpha; This is a probable transcription activator that specifically binds the purine-rich single strand of the PUR element located upstream of the MYC gene. May play a role in the initiation of DNA replication and in recombination
MCL	22	Medium Orchid	3	DST	Dystonin; Cytoskeletal linker protein. Acts as an integrator of intermediate filaments, actin and microtubule cytoskeleton networks. Required for anchoring either intermediate filaments to the actin cytoskeleton in neural and muscle cells or keratin- containing intermediate filaments to hemidesmosomes in epithelial cells. The proteins may self-aggregate to form filaments or a two- dimensional mes…
MCL	22	Medium Orchid	3	GAN	Kelch-like protein 16 (gigaxonin); Gigaxonin; Probable cytoskeletal component that directly or indirectly plays an important role in neurofilament architecture. May act as a substrate-specific adapter of an E3 ubiquitin-protein ligase complex which mediates the ubiquitination and subsequent proteasomal degradation of target proteins. Controls degradation of TBCB. Controls degradation of MAP1B and…
MCL	22	Medium Orchid	3	LZTR1	Leucine-zipper-like transcriptional regulator 1; Probable transcriptional regulator that may play a crucial role in embryogenesis; BTB domain containing
MCL	23	Orchid 2	3	NGLY1	Peptide-N(4)-(N-acetyl-beta-glucosaminyl)asparagine amidase; Specifically deglycosylates the denatured form of N- linked glycoproteins in the cytoplasm and assists their proteasome-mediated degradation. Cleaves the beta-aspartyl- glucosamine (GlcNAc) of the glycan and the amide side chain of Asn, converting Asn to Asp. Prefers proteins containing high- mannose over those bearing complex type olig…
MCL	23	Orchid 2	3	VCP	Transitional endoplasmic reticulum ATPase; Necessary for the fragmentation of Golgi stacks during mitosis and for their reassembly after mitosis. Involved in the formation of the transitional endoplasmic reticulum (tER). The transfer of membranes from the endoplasmic reticulum to the Golgi apparatus occurs via 50-70 nm transition vesicles which derive from part-rough, part-smooth transitional ele…
MCL	23	Orchid 2	3	YWHAG	14-3-3 protein gamma; Adapter protein implicated in the regulation of a large spectrum of both general and specialized signaling pathways. Binds to a large number of partners, usually by recognition of a phosphoserine or phosphothreonine motif. Binding generally results in the modulation of the activity of the binding partner; Belongs to the 14-3-3 family
MCL	24	Violet 2	3	GHR	Growth hormone receptor; Receptor for pituitary gland growth hormone involved in regulating postnatal body growth. On ligand binding, couples to the JAK2/STAT5 pathway (By similarity); Belongs to the type I cytokine receptor family. Type 1 subfamily
MCL	24	Violet 2	3	PROKR2	Prokineticin receptor 2; Receptor for prokineticin 2. Exclusively coupled to the G(q) subclass of heteromeric G proteins. Activation leads to mobilization of calcium, stimulation of phosphoinositide turnover and activation of p44/p42 mitogen-activated protein kinase
MCL	24	Violet 2	3	PROP1	Homeobox protein prophet of Pit-1; Possibly involved in the ontogenesis of pituitary gonadotropes, as well as somatotropes, lactotropes and caudomedial thyrotropes; PRD class homeoboxes and pseudogenes
MCL	25	Violet	2	GBE1	1,4-alpha-glucan-branching enzyme; Required for normal glycogen accumulation. The alpha 1-6 branches of glycogen play an important role in increasing the solubility of the molecule (Probable); Belongs to the glycosyl hydrolase 13 family. GlgB subfamily
MCL	25	Violet	2	GYS2	Glycogen [starch] synthase, liver; Transfers the glycosyl residue from UDP-Glc to the non- reducing end of alpha-1,4-glucan; Glycosyl transferases group 1 domain containing
MCL	26	Orchid	2	EEF1A2	Elongation factor 1-alpha 2; This protein promotes the GTP-dependent binding of aminoacyl-tRNA to the A-site of ribosomes during protein biosynthesis; Belongs to the TRAFAC class translation factor GTPase superfamily. Classic translation factor GTPase family. EF-Tu/EF-1A subfamily
MCL	26	Orchid	2	PAPSS2	Bifunctional 3'-phosphoadenosine 5'-phosphosulfate synthase 2; Bifunctional enzyme with both ATP sulfurylase and APS kinase activity, which mediates two steps in the sulfate activation pathway. The first step is the transfer of a sulfate group to ATP to yield adenosine 5'-phosphosulfate (APS), and the second step is the transfer of a phosphate group from ATP to APS yielding 3'-phosphoadenylylsulf…
MCL	27	Hot Pink	2	PHF3	PHD finger protein 3
MCL	27	Hot Pink	2	WAC	WW domain-containing adapter protein with coiled-coil; Acts as a linker between gene transcription and histone H2B monoubiquitination at 'Lys-120' (H2BK120ub1). Interacts with the RNA polymerase II transcriptional machinery via its WW domain and with RNF20-RNF40 via its coiled coil region, thereby linking and regulating H2BK120ub1 and gene transcription. Regulates the cell-cycle checkpoint activa…
MCL	28	Pink	2	PIEZO1	Piezo-type mechanosensitive ion channel component 1; Pore-forming subunit of a mechanosensitive non-specific cation channel. Generates currents characterized by a linear current-voltage relationship that are sensitive to ruthenium red and gadolinium. Plays a key role in epithelial cell adhesion by maintaining integrin activation through R-Ras recruitment to the ER, most probably in its activated …
MCL	28	Pink	2	TRPM1	Transient receptor potential cation channel subfamily M member 1; Cation channel essential for the depolarizing photoresponse of retinal ON bipolar cells. It is part of the GRM6 signaling cascade. May play a role in metastasis suppression (By similarity). May act as a spontaneously active, calcium-permeable plasma membrane channel; Belongs to the transient receptor (TC 1.A.4) family. LTrpC subfam…
MCL	29	Pale Violet Red	2	ALOXE3	Hydroperoxy icosatetraenoate dehydratase/isomerase; Hydroperoxide isomerase ALOXE3; Non-heme iron-containing lipoxygenase which is atypical in that it displays a prominent hydroperoxide isomerase activity and a reduced dioxygenase activity compared to other lipoxygenases. The hydroperoxide isomerase activity catalyzes the isomerization of hydroperoxides, derived from arachidonic and linoleic acid…
MCL	29	Pale Violet Red	2	SPINK5	Serine protease inhibitor Kazal-type 5; Serine protease inhibitor, probably important for the anti-inflammatory and/or antimicrobial protection of mucous epithelia. Contribute to the integrity and protective barrier function of the skin by regulating the activity of defense- activating and desquamation-involved proteases. Inhibits KLK5, it's major target, in a pH-dependent manner. Inhibits KLK7, …
MCL	30	Light Coral	2	RIPPLY2	Ripply transcriptional repressor 2; Protein ripply2; Plays a role in somitogenesis. Required for somite segregation and establishment of rostrocaudal polarity in somites (By similarity)
MCL	30	Light Coral	2	ZNF142	Zinc finger protein 142; May be involved in transcriptional regulation; Zinc fingers C2H2-type

## Sheet: Enrichment subnetwork1 seizure 
#category	term ID	term description	observed gene count	background gene count	strength	false discovery rate	matching proteins in your network (labels)
GO Biological Process
GO Process	GO:0042391	Regulation of membrane potential	25	440	1.17	3.96e-18	STX1B,HCN4,GLRB,CNTNAP1,SCN1A,GABRB3,KCND3,FGF13,KCNJ11,SCN8A,ANK2,CACNA1A,RYR2,GRIN1,SCN2A,GRIN2A,DLG4,SCN9A,RELN,MECP2,SCN1B,ATP1A3,GRIN2B,GRIA3,GJA5
GO Process	GO:0007399	Nervous system development	42	2371	0.66	1.68e-15	STX1B,PHOX2B,UBE3A,SIX3,GLRB,CNTNAP1,TBC1D24,GABRB3,RBFOX1,TUBB3,FGF13,OXTR,FOXG1,TRIO,AUTS2,SCN8A,ANK2,KCNQ2,CNTNAP2,POU3F3,NKX6-2,PAX2,SLC9A6,GRIN1,SPTAN1,PCDH19,STXBP1,SCN2A,PDX1,TBR1,ADNP,GRIN2A,GRIP1,DYRK1A,DLG4,MBD5,RELN,MECP2,SCN1B,SYNGAP1,GDNF,GRIN2B
GO Process	GO:0065008	Regulation of biological quality	52	4042	0.52	2.12e-15	STX1B,PHOX2B,UBE3A,CCDC115,HCN4,GLRB,CNTNAP1,CLCN2,GATA6,FLCN,SLC6A1,SCN1A,ABCC8,COG7,HOMER2,ITPR1,GABRB3,KCND3,FGF13,OXTR,GATA4,KCNJ11,SCN8A,ANK2,CACNA1A,POU3F3,RYR2,PAX2,SLC9A6,GRIN1,SPTAN1,STXBP1,SCN2A,PDX1,ADNP,IQSEC2,GRIN2A,GRIP1,DLG4,MBD5,SCN9A,UNC80,RELN,MECP2,SCN1B,SYNGAP1,GDNF,ATP1A3,PRRT2,GRIN2B,GRIA3,GJA5
GO Process	GO:0003008	System process	38	1942	0.7	4.61e-15	PHOX2B,SIX3,HCN4,GLRB,CNTNAP1,GATA6,SLC6A1,SCN1A,HOMER2,GABRB3,KCND3,FGF13,OXTR,GATA4,KCNJ11,SCN8A,ANK2,CNTNAP2,POU3F3,RYR2,NKX6-2,PAX2,GRIN1,SCN2A,TBR1,ADNP,GRIN2A,DLG4,SCN9A,RELN,MECP2,SCN1B,SYNGAP1,GDNF,PRRT2,GRIN2B,GRIA3,GJA5
GO Process	GO:0030001	Metal ion transport	24	666	0.97	1.46e-13	HCN4,SLC6A1,SCN1A,ABCC8,ITPR1,KCND3,FGF13,KCNJ11,SCN8A,ANK2,KCNQ2,CACNA1A,RYR2,SLC9A6,GRIN1,KCNT1,SCN2A,GRIN2A,SCN9A,SCN1B,SLC6A5,ATP1A3,GRIN2B,GJA5
GO Process	GO:0043269	Regulation of ion transport	24	696	0.95	3.18e-13	HCN4,CLCN2,SLC6A1,SCN1A,HOMER2,KCND3,KCNJ11,SCN8A,ANK2,KCNQ2,CACNA1A,RYR2,GRIN1,STXBP1,SCN2A,GRIN2A,DLG4,SCN9A,RELN,SCN1B,GDNF,GRIN2B,GRIA3,GJA5
GO Process	GO:0006812	Cation transport	26	881	0.88	4.13e-13	HCN4,SLC6A1,SCN1A,ABCC8,ITPR1,KCND3,FGF13,KCNJ11,SCN8A,ANK2,KCNQ2,CACNA1A,RYR2,SLC9A6,GRIN1,KCNT1,SCN2A,GRIN2A,SCN9A,UNC80,SCN1B,SLC6A5,ATP1A3,GRIN2B,GRIA3,GJA5
GO Process	GO:0098660	Inorganic ion transmembrane transport	24	714	0.94	4.15e-13	HCN4,GLRB,CLCN2,SLC6A1,SCN1A,ABCC8,ITPR1,GABRB3,KCND3,KCNJ11,SCN8A,KCNQ2,CACNA1A,RYR2,SLC9A6,GRIN1,KCNT1,SCN2A,GRIN2A,SCN9A,SCN1B,SLC6A5,ATP1A3,GRIN2B
GO Process	GO:0051179	Localization	56	5591	0.41	8.60e-13	STX1B,PHOX2B,UBE3A,IER3IP1,SIX3,HCN4,GLRB,CNTNAP1,CLCN2,FLCN,SLC6A1,SCN1A,ABCC8,COG7,ITPR1,GABRB3,RBFOX1,KCND3,FGF13,OXTR,FRAS1,KPTN,FOXG1,BRAT1,AUTS2,KCNJ11,SCN8A,ANK2,KCNQ2,CACNA1A,CNTNAP2,POU3F3,RYR2,SLC9A6,GRIN1,KCNT1,SPTAN1,STXBP1,SCN2A,PDX1,GRIN2A,GRIP1,DLG4,SCN9A,UNC80,RELN,MECP2,SCN1B,SYNGAP1,GDNF,SLC6A5,ATP1A3,PRRT2,GRIN2B,GRIA3,GJA5
GO Process	GO:0006811	Ion transport	30	1344	0.76	1.16e-12	HCN4,GLRB,CLCN2,SLC6A1,SCN1A,ABCC8,ITPR1,GABRB3,KCND3,FGF13,KCNJ11,SCN8A,ANK2,KCNQ2,CACNA1A,RYR2,SLC9A6,GRIN1,KCNT1,STXBP1,SCN2A,GRIN2A,SCN9A,UNC80,SCN1B,SLC6A5,ATP1A3,GRIN2B,GRIA3,GJA5
GO Process	GO:0034765	Regulation of ion transmembrane transport	20	477	2023-03-01	2.72e-12	HCN4,CLCN2,SCN1A,KCND3,KCNJ11,SCN8A,ANK2,KCNQ2,CACNA1A,RYR2,GRIN1,SCN2A,GRIN2A,DLG4,SCN9A,RELN,SCN1B,GRIN2B,GRIA3,GJA5
GO Process	GO:0048731	System development	49	4426	0.45	8.25e-12	STX1B,PHOX2B,UBE3A,SIX3,GLRB,CNTNAP1,CLCN2,GATA6,FLCN,TBC1D24,GABRB3,RBFOX1,TUBB3,FGF13,OXTR,FRAS1,GATA4,FOXG1,TRIO,AUTS2,SCN8A,ANK2,KCNQ2,CNTNAP2,POU3F3,RYR2,NKX6-2,PAX2,SLC9A6,GRIN1,SPTAN1,PCDH19,STXBP1,SCN2A,PDX1,TBR1,ADNP,GRIN2A,GRIP1,DYRK1A,DLG4,MBD5,RELN,MECP2,SCN1B,SYNGAP1,GDNF,GRIN2B,GJA5
GO Process	GO:0050877	Nervous system process	29	1352	0.74	8.25e-12	PHOX2B,SIX3,GLRB,CNTNAP1,SLC6A1,SCN1A,HOMER2,GABRB3,FGF13,OXTR,KCNJ11,SCN8A,CNTNAP2,NKX6-2,PAX2,GRIN1,SCN2A,TBR1,ADNP,GRIN2A,DLG4,SCN9A,RELN,MECP2,SCN1B,SYNGAP1,PRRT2,GRIN2B,GRIA3
GO Process	GO:0032501	Multicellular organismal process	60	6933	0.35	9.67e-12	STX1B,PHOX2B,UBE3A,SIX3,HCN4,GLRB,CNTNAP1,CLCN2,GATA6,FLCN,SLC6A1,TBC1D24,SCN1A,HOMER2,ITPR1,GABRB3,RBFOX1,KCND3,TUBB3,FGF13,OXTR,FRAS1,GATA4,FOXG1,TRIO,AUTS2,KCNJ11,SCN8A,ANK2,KCNQ2,CNTNAP2,POU3F3,RYR2,NKX6-2,PAX2,SLC9A6,GRIN1,SPTAN1,PCDH19,STXBP1,SCN2A,PDX1,TBR1,ADNP,GRIN2A,GRIP1,DYRK1A,DLG4,MBD5,SCN9A,RELN,MECP2,SCN1B,SYNGAP1,GDNF,ATP1A3,PRRT2,GRIN2B,GRIA3,GJA5
GO Process	GO:0035637	Multicellular organismal signaling	13	137	1.39	1.35e-11	HCN4,CNTNAP1,SCN1A,KCND3,SCN8A,ANK2,CNTNAP2,RYR2,SCN2A,SCN9A,SCN1B,ATP1A3,GJA5
GO Process	GO:0098662	Inorganic cation transmembrane transport	21	628	0.93	2.18e-11	HCN4,SLC6A1,SCN1A,ABCC8,ITPR1,KCND3,KCNJ11,SCN8A,KCNQ2,CACNA1A,RYR2,SLC9A6,GRIN1,KCNT1,SCN2A,GRIN2A,SCN9A,SCN1B,SLC6A5,ATP1A3,GRIN2B
GO Process	GO:0007275	Multicellular organism development	51	5023	0.42	3.16e-11	STX1B,PHOX2B,UBE3A,SIX3,GLRB,CNTNAP1,CLCN2,GATA6,FLCN,TBC1D24,ITPR1,GABRB3,RBFOX1,TUBB3,FGF13,OXTR,FRAS1,GATA4,FOXG1,TRIO,AUTS2,SCN8A,ANK2,KCNQ2,CNTNAP2,POU3F3,RYR2,NKX6-2,PAX2,SLC9A6,GRIN1,SPTAN1,PCDH19,STXBP1,SCN2A,PDX1,TBR1,ADNP,GRIN2A,GRIP1,DYRK1A,DLG4,MBD5,SCN9A,RELN,MECP2,SCN1B,SYNGAP1,GDNF,GRIN2B,GJA5
GO Process	GO:0007610	Behavior	20	572	0.95	3.85e-11	SIX3,GLRB,SLC6A1,SCN1A,HOMER2,FGF13,OXTR,CNTNAP2,GRIN1,SCN2A,TBR1,ADNP,GRIN2A,DLG4,SCN9A,RELN,MECP2,SYNGAP1,GDNF,GRIN2B
GO Process	GO:0001508	Action potential	11	97	1.47	1.96e-10	HCN4,CNTNAP1,SCN1A,KCND3,SCN8A,ANK2,RYR2,SCN2A,SCN9A,SCN1B,GJA5
GO Process	GO:0048878	Chemical homeostasis	25	1124	0.76	2.75e-10	UBE3A,CCDC115,HCN4,HOMER2,ITPR1,OXTR,GATA4,KCNJ11,ANK2,CACNA1A,POU3F3,RYR2,PAX2,SLC9A6,GRIN1,PDX1,ADNP,GRIN2A,DLG4,MBD5,UNC80,SCN1B,ATP1A3,GRIN2B,GJA5
GO Process	GO:0051049	Regulation of transport	30	1776	0.64	6.11e-10	STX1B,HCN4,CLCN2,SLC6A1,SCN1A,ABCC8,HOMER2,ITPR1,KCND3,OXTR,KCNJ11,SCN8A,ANK2,KCNQ2,CACNA1A,RYR2,GRIN1,STXBP1,SCN2A,PDX1,GRIN2A,DLG4,SCN9A,RELN,SCN1B,GDNF,PRRT2,GRIN2B,GRIA3,GJA5
GO Process	GO:0015672	Monovalent inorganic cation transport	17	441	1.0	6.82e-10	HCN4,SLC6A1,SCN1A,ABCC8,KCND3,FGF13,KCNJ11,SCN8A,KCNQ2,SLC9A6,KCNT1,SCN2A,SCN9A,SCN1B,SLC6A5,ATP1A3,GJA5
GO Process	GO:0022008	Neurogenesis	29	1657	0.65	6.82e-10	STX1B,PHOX2B,UBE3A,SIX3,CNTNAP1,TBC1D24,GABRB3,TUBB3,FGF13,FOXG1,TRIO,AUTS2,CNTNAP2,NKX6-2,PAX2,SLC9A6,GRIN1,SPTAN1,STXBP1,TBR1,ADNP,GRIN2A,GRIP1,DLG4,RELN,MECP2,SCN1B,SYNGAP1,GDNF
GO Process	GO:0050804	Modulation of chemical synaptic transmission	17	446	0.99	7.55e-10	STX1B,SLC6A1,OXTR,CACNA1A,GRIN1,STXBP1,ADNP,IQSEC2,GRIN2A,DLG4,RELN,MECP2,SYNGAP1,GDNF,PRRT2,GRIN2B,GRIA3
GO Process	GO:0048699	Generation of neurons	28	1551	0.67	8.15e-10	STX1B,PHOX2B,UBE3A,SIX3,CNTNAP1,TBC1D24,GABRB3,TUBB3,FGF13,FOXG1,TRIO,AUTS2,CNTNAP2,NKX6-2,PAX2,SLC9A6,GRIN1,SPTAN1,STXBP1,TBR1,ADNP,GRIP1,DLG4,RELN,MECP2,SCN1B,SYNGAP1,GDNF
GO Process	GO:0007611	Learning or memory	14	259	1.14	9.20e-10	SLC6A1,FGF13,OXTR,CNTNAP2,GRIN1,SCN2A,TBR1,ADNP,GRIN2A,DLG4,RELN,MECP2,SYNGAP1,GRIN2B
GO Process	GO:0032879	Regulation of localization	36	2740	0.53	1.49e-09	STX1B,HCN4,CLCN2,FLCN,SLC6A1,SCN1A,ABCC8,HOMER2,ITPR1,KCND3,FGF13,OXTR,GATA4,KCNJ11,SCN8A,ANK2,KCNQ2,CACNA1A,RYR2,GRIN1,STXBP1,SCN2A,PDX1,TBR1,IQSEC2,GRIN2A,DLG4,SCN9A,RELN,MECP2,SCN1B,GDNF,PRRT2,GRIN2B,GRIA3,GJA5
GO Process	GO:0031175	Neuron projection development	19	680	0.86	4.99e-09	PHOX2B,CNTNAP1,TBC1D24,TUBB3,FOXG1,TRIO,AUTS2,CNTNAP2,PAX2,SLC9A6,SPTAN1,STXBP1,GRIP1,DLG4,RELN,MECP2,SCN1B,SYNGAP1,GDNF
GO Process	GO:0044057	Regulation of system process	18	592	0.89	4.99e-09	STX1B,PHOX2B,HCN4,ITPR1,KCND3,FGF13,OXTR,GATA4,KCNJ11,ANK2,RYR2,GRIN1,DLG4,RELN,MECP2,SCN1B,ATP1A3,GJA5
GO Process	GO:0007154	Cell communication	49	5320	0.37	5.19e-09	STX1B,UBE3A,HCN4,GLRB,CNTNAP1,DOCK3,FLCN,SLC6A1,SCN1A,HOMER2,ITPR1,GABRB3,TUBB3,FGF13,OXTR,FRAS1,GATA4,KPTN,TRIO,SCN8A,ANK2,KCNQ2,CACNA1A,CNTNAP2,RYR2,PAX2,SLC9A6,GRIN1,SPTAN1,STXBP1,SCN2A,PDX1,ADNP,GRIN2A,GRIP1,DLG4,DEPDC5,SCN9A,RELN,MECP2,SCN1B,SYNGAP1,GDNF,SLC6A5,ATP1A3,PRRT2,GRIN2B,GRIA3,GJA5
GO Process	GO:0007417	Central nervous system development	22	988	0.76	6.09e-09	PHOX2B,UBE3A,SIX3,CNTNAP1,FGF13,OXTR,FOXG1,TRIO,CNTNAP2,POU3F3,NKX6-2,PAX2,GRIN1,PCDH19,PDX1,TBR1,GRIN2A,RELN,MECP2,SCN1B,GDNF,GRIN2B
GO Process	GO:0030182	Neuron differentiation	22	1019	0.74	1.04e-08	PHOX2B,CNTNAP1,TBC1D24,GABRB3,TUBB3,FOXG1,TRIO,AUTS2,CNTNAP2,NKX6-2,PAX2,SLC9A6,SPTAN1,STXBP1,TBR1,GRIP1,DLG4,RELN,MECP2,SCN1B,SYNGAP1,GDNF
GO Process	GO:0023052	Signaling	48	5239	0.37	1.20e-08	STX1B,UBE3A,HCN4,GLRB,CNTNAP1,DOCK3,FLCN,SLC6A1,SCN1A,HOMER2,ITPR1,GABRB3,KCND3,TUBB3,FGF13,OXTR,GATA4,TRIO,SCN8A,ANK2,KCNQ2,CACNA1A,CNTNAP2,RYR2,PAX2,SLC9A6,GRIN1,SPTAN1,STXBP1,SCN2A,PDX1,ADNP,GRIN2A,GRIP1,DLG4,DEPDC5,SCN9A,RELN,MECP2,SCN1B,SYNGAP1,GDNF,SLC6A5,ATP1A3,PRRT2,GRIN2B,GRIA3,GJA5
GO Process	GO:0007267	Cell-cell signaling	23	1145	0.71	1.30e-08	STX1B,HCN4,GLRB,SLC6A1,GABRB3,FGF13,GATA4,ANK2,KCNQ2,CACNA1A,RYR2,GRIN1,STXBP1,PDX1,GRIN2A,DLG4,MECP2,SCN1B,SLC6A5,PRRT2,GRIN2B,GRIA3,GJA5
GO Process	GO:0048666	Neuron development	20	827	0.79	1.31e-08	PHOX2B,CNTNAP1,TBC1D24,GABRB3,TUBB3,FOXG1,TRIO,AUTS2,CNTNAP2,PAX2,SLC9A6,SPTAN1,STXBP1,GRIP1,DLG4,RELN,MECP2,SCN1B,SYNGAP1,GDNF
GO Process	GO:0051234	Establishment of localization	44	4479	0.4	1.81e-08	STX1B,UBE3A,IER3IP1,SIX3,HCN4,GLRB,CLCN2,SLC6A1,SCN1A,ABCC8,COG7,ITPR1,GABRB3,RBFOX1,KCND3,FGF13,OXTR,FRAS1,KCNJ11,SCN8A,ANK2,KCNQ2,CACNA1A,RYR2,SLC9A6,GRIN1,KCNT1,SPTAN1,STXBP1,SCN2A,PDX1,GRIN2A,GRIP1,DLG4,SCN9A,UNC80,MECP2,SCN1B,SLC6A5,ATP1A3,PRRT2,GRIN2B,GRIA3,GJA5
GO Process	GO:0051899	Membrane depolarization	8	53	1.59	2.45e-08	HCN4,SCN1A,SCN8A,ANK2,CACNA1A,SCN2A,SCN9A,SCN1B
GO Process	GO:0007268	Chemical synaptic transmission	15	418	0.97	2.56e-08	STX1B,GLRB,SLC6A1,GABRB3,KCNQ2,CACNA1A,GRIN1,STXBP1,GRIN2A,DLG4,MECP2,SLC6A5,PRRT2,GRIN2B,GRIA3
GO Process	GO:0086010	Membrane depolarization during action potential	7	30	1.78	2.56e-08	HCN4,SCN1A,SCN8A,ANK2,SCN2A,SCN9A,SCN1B
GO Process	GO:0006810	Transport	43	4353	0.41	2.82e-08	STX1B,UBE3A,IER3IP1,SIX3,HCN4,GLRB,CLCN2,SLC6A1,SCN1A,ABCC8,COG7,ITPR1,GABRB3,RBFOX1,KCND3,FGF13,OXTR,FRAS1,KCNJ11,SCN8A,ANK2,KCNQ2,CACNA1A,RYR2,SLC9A6,GRIN1,KCNT1,SPTAN1,STXBP1,SCN2A,PDX1,GRIN2A,GRIP1,SCN9A,UNC80,MECP2,SCN1B,SLC6A5,ATP1A3,PRRT2,GRIN2B,GRIA3,GJA5
GO Process	GO:0006814	Sodium ion transport	11	182	1.19	5.12e-08	HCN4,SLC6A1,SCN1A,FGF13,SCN8A,SLC9A6,SCN2A,SCN9A,SCN1B,SLC6A5,ATP1A3
GO Process	GO:0023051	Regulation of signaling	38	3553	0.44	8.30e-08	STX1B,UBE3A,SIX3,FLCN,SLC6A1,ABCC8,HOMER2,ITPR1,CC2D1A,OXTR,GATA4,KPTN,TRIO,AUTS2,KCNJ11,ANK2,CACNA1A,RYR2,SLC9A6,GRIN1,STXBP1,PDX1,ADNP,IQSEC2,GRIN2A,DYRK1A,DLG4,DEPDC5,MBD5,RELN,MECP2,SYNGAP1,GDNF,ATP1A3,PRRT2,GRIN2B,GRIA3,GJA5
GO Process	GO:0065007	Biological regulation	71	12171	0.18	9.33e-08	STX1B,PHOX2B,UBE3A,IER3IP1,CCDC115,SIX3,HCN4,GLRB,CNTNAP1,CLCN2,DOCK3,GATA6,POGZ,FLCN,SLC6A1,TBC1D24,SCN1A,ABCC8,COG7,HOMER2,ITPR1,GABRB3,RBFOX1,CC2D1A,KCND3,TUBB3,FGF13,OXTR,GATA4,KPTN,FOXG1,TRIO,BRAT1,AUTS2,KCNJ11,SCN8A,ANK2,KCNQ2,CACNA1A,POU3F3,RYR2,NKX6-2,PAX2,SLC9A6,GRIN1,SPTAN1,STXBP1,SCN2A,PDX1,TBR1,ADNP,IQSEC2,GRIN2A,GRIP1,DYRK1A,DLG4,DEPDC5,MBD5,SCN9A,UNC80,RELN,MECP2,SCN1B,SYNGAP1,GDNF,…
GO Process	GO:0007612	Learning	10	145	1.25	9.98e-08	SLC6A1,FGF13,CNTNAP2,GRIN1,TBR1,GRIN2A,DLG4,RELN,MECP2,SYNGAP1
GO Process	GO:0042592	Homeostatic process	26	1676	0.6	9.98e-08	UBE3A,CCDC115,HCN4,FLCN,HOMER2,ITPR1,OXTR,GATA4,KCNJ11,ANK2,CACNA1A,POU3F3,RYR2,PAX2,SLC9A6,GRIN1,PDX1,ADNP,GRIN2A,DLG4,MBD5,UNC80,SCN1B,ATP1A3,GRIN2B,GJA5
GO Process	GO:0050806	Positive regulation of synaptic transmission	10	147	1.24	1.09e-07	STX1B,OXTR,GRIN1,STXBP1,GRIN2A,DLG4,RELN,MECP2,PRRT2,GRIN2B
GO Process	GO:0050905	Neuromuscular process	9	109	1.33	1.66e-07	GLRB,CNTNAP1,SCN1A,NKX6-2,GRIN1,GRIN2A,DLG4,MECP2,PRRT2
GO Process	GO:0048812	Neuron projection morphogenesis	15	495	0.89	1.90e-07	PHOX2B,CNTNAP1,TUBB3,FOXG1,TRIO,AUTS2,CNTNAP2,PAX2,SLC9A6,SPTAN1,STXBP1,DLG4,RELN,SCN1B,GDNF
GO Process	GO:0010646	Regulation of cell communication	37	3514	0.43	2.25e-07	STX1B,UBE3A,SIX3,FLCN,SLC6A1,ABCC8,HOMER2,ITPR1,CC2D1A,OXTR,GATA4,KPTN,TRIO,AUTS2,KCNJ11,ANK2,CACNA1A,RYR2,SLC9A6,GRIN1,STXBP1,PDX1,ADNP,IQSEC2,GRIN2A,DYRK1A,DLG4,DEPDC5,MBD5,RELN,MECP2,SYNGAP1,GDNF,PRRT2,GRIN2B,GRIA3,GJA5
GO Process	GO:0032989	Cellular component morphogenesis	16	614	0.83	3.78e-07	PHOX2B,CNTNAP1,TUBB3,FOXG1,TRIO,AUTS2,ANK2,CNTNAP2,PAX2,SLC9A6,SPTAN1,STXBP1,DLG4,RELN,SCN1B,GDNF
GO Process	GO:0007613	Memory	9	122	1.28	3.82e-07	SLC6A1,FGF13,OXTR,GRIN1,SCN2A,ADNP,GRIN2A,RELN,MECP2
GO Process	GO:1903522	Regulation of blood circulation	12	292	2023-02-01	3.82e-07	HCN4,ITPR1,KCND3,FGF13,OXTR,GATA4,KCNJ11,ANK2,RYR2,SCN1B,ATP1A3,GJA5
GO Process	GO:0086001	Cardiac muscle cell action potential	7	50	1.56	4.19e-07	HCN4,SCN1A,KCND3,ANK2,RYR2,SCN1B,GJA5
GO Process	GO:0019226	Transmission of nerve impulse	7	54	1.52	6.73e-07	CNTNAP1,SCN1A,SCN8A,CNTNAP2,SCN2A,SCN9A,SCN1B
GO Process	GO:0008016	Regulation of heart contraction	11	245	2023-06-01	7.40e-07	HCN4,ITPR1,KCND3,FGF13,GATA4,KCNJ11,ANK2,RYR2,SCN1B,ATP1A3,GJA5
GO Process	GO:0048468	Cell development	24	1629	0.58	1.25e-06	PHOX2B,SIX3,CNTNAP1,TBC1D24,GABRB3,TUBB3,GATA4,FOXG1,TRIO,AUTS2,ANK2,CNTNAP2,NKX6-2,PAX2,SLC9A6,SPTAN1,STXBP1,GRIP1,DLG4,RELN,MECP2,SCN1B,SYNGAP1,GDNF
GO Process	GO:0034330	Cell junction organization	14	493	0.86	1.38e-06	GLRB,CNTNAP1,FLCN,SLC6A1,GABRB3,FGF13,ANK2,SLC9A6,DLG4,RELN,MECP2,SYNGAP1,GDNF,GJA5
GO Process	GO:0120036	Plasma membrane bounded cell projection organization	20	1122	0.66	1.40e-06	PHOX2B,CNTNAP1,TBC1D24,TUBB3,FOXG1,TRIO,AUTS2,CNTNAP2,PAX2,SLC9A6,SPTAN1,STXBP1,GRIP1,DLG4,RELN,MECP2,SCN1B,SYNGAP1,GDNF,ATP1A3
GO Process	GO:0050801	Ion homeostasis	17	796	0.74	1.74e-06	UBE3A,CCDC115,HCN4,ITPR1,OXTR,ANK2,CACNA1A,RYR2,SLC9A6,GRIN1,GRIN2A,DLG4,UNC80,SCN1B,ATP1A3,GRIN2B,GJA5
GO Process	GO:2000310	Regulation of nmda receptor activity	6	36	1.63	2.21e-06	GRIN1,GRIN2A,DLG4,RELN,GRIN2B,GRIA3
GO Process	GO:0086004	Regulation of cardiac muscle cell contraction	6	37	1.62	2.52e-06	HCN4,FGF13,GATA4,ANK2,RYR2,GJA5
GO Process	GO:0050789	Regulation of biological process	67	11475	0.18	3.18e-06	STX1B,PHOX2B,UBE3A,IER3IP1,SIX3,HCN4,GLRB,CNTNAP1,CLCN2,DOCK3,GATA6,POGZ,FLCN,SLC6A1,SCN1A,ABCC8,HOMER2,ITPR1,GABRB3,RBFOX1,CC2D1A,KCND3,TUBB3,FGF13,OXTR,GATA4,KPTN,FOXG1,TRIO,BRAT1,AUTS2,KCNJ11,SCN8A,ANK2,KCNQ2,CACNA1A,POU3F3,RYR2,NKX6-2,PAX2,SLC9A6,GRIN1,SPTAN1,STXBP1,SCN2A,PDX1,TBR1,ADNP,IQSEC2,GRIN2A,GRIP1,DYRK1A,DLG4,DEPDC5,MBD5,SCN9A,RELN,MECP2,SCN1B,SYNGAP1,GDNF,ATP1A3,PRRT2,GFAP,GRIN2B,GR…
GO Process	GO:0086002	Cardiac muscle cell action potential involved in contraction	6	39	2023-06-01	3.23e-06	SCN1A,KCND3,ANK2,RYR2,SCN1B,GJA5
GO Process	GO:0048667	Cell morphogenesis involved in neuron differentiation	13	445	0.88	3.28e-06	PHOX2B,TUBB3,FOXG1,TRIO,AUTS2,PAX2,SLC9A6,SPTAN1,STXBP1,DLG4,RELN,SCN1B,GDNF
GO Process	GO:0003012	Muscle system process	11	297	0.98	4.26e-06	HCN4,GATA6,SCN1A,KCND3,OXTR,GATA4,ANK2,RYR2,SCN1B,GDNF,GJA5
GO Process	GO:0007420	Brain development	16	745	0.74	4.26e-06	PHOX2B,UBE3A,SIX3,FGF13,OXTR,FOXG1,CNTNAP2,POU3F3,PAX2,GRIN1,PCDH19,TBR1,GRIN2A,RELN,MECP2,GRIN2B
GO Process	GO:0055082	Cellular chemical homeostasis	16	753	0.74	4.75e-06	UBE3A,CCDC115,ITPR1,OXTR,GATA4,KCNJ11,ANK2,CACNA1A,RYR2,PAX2,SLC9A6,GRIN1,GRIN2A,DLG4,ATP1A3,GRIN2B
GO Process	GO:0008306	Associative learning	7	76	1.37	4.80e-06	SLC6A1,GRIN1,TBR1,GRIN2A,RELN,MECP2,SYNGAP1
GO Process	GO:0050794	Regulation of cellular process	65	10932	0.18	5.13e-06	STX1B,PHOX2B,UBE3A,IER3IP1,SIX3,HCN4,GLRB,CNTNAP1,CLCN2,DOCK3,GATA6,FLCN,SLC6A1,SCN1A,ABCC8,HOMER2,ITPR1,GABRB3,RBFOX1,CC2D1A,KCND3,TUBB3,FGF13,OXTR,GATA4,KPTN,FOXG1,TRIO,BRAT1,AUTS2,KCNJ11,SCN8A,ANK2,KCNQ2,CACNA1A,POU3F3,RYR2,NKX6-2,PAX2,SLC9A6,GRIN1,SPTAN1,STXBP1,SCN2A,PDX1,TBR1,ADNP,IQSEC2,GRIN2A,GRIP1,DYRK1A,DLG4,DEPDC5,MBD5,SCN9A,RELN,MECP2,SCN1B,SYNGAP1,GDNF,PRRT2,GFAP,GRIN2B,GRIA3,GJA5
GO Process	GO:0006813	Potassium ion transport	9	174	2023-12-01	5.28e-06	HCN4,ABCC8,KCND3,KCNJ11,KCNQ2,SLC9A6,KCNT1,ATP1A3,GJA5
GO Process	GO:0007409	Axonogenesis	12	384	0.91	5.35e-06	PHOX2B,TUBB3,FOXG1,TRIO,AUTS2,PAX2,SLC9A6,SPTAN1,STXBP1,RELN,SCN1B,GDNF
GO Process	GO:0086065	Cell communication involved in cardiac conduction	6	44	1.55	5.44e-06	HCN4,ANK2,RYR2,SCN1B,ATP1A3,GJA5
GO Process	GO:2001257	Regulation of cation channel activity	9	177	2023-12-01	5.88e-06	KCNJ11,ANK2,GRIN1,GRIN2A,DLG4,RELN,SCN1B,GRIN2B,GRIA3
GO Process	GO:0009987	Cellular process	75	15024	0.11	6.67e-06	STX1B,PHOX2B,UBE3A,IER3IP1,CCDC115,SIX3,HCN4,GLRB,CNTNAP1,CLCN2,DOCK3,GATA6,POGZ,FLCN,SLC6A1,TBC1D24,SCN1A,ABCC8,COG7,HOMER2,ITPR1,GABRB3,RBFOX1,KCND3,TUBB3,FGF13,OXTR,FRAS1,GATA4,KPTN,FOXG1,TRIO,BRAT1,AUTS2,KCNJ11,SCN8A,ANK2,KCNQ2,CACNA1A,CNTNAP2,POU3F3,RYR2,NKX6-2,PAX2,SLC9A6,GRIN1,KCNT1,SPTAN1,PCDH19,STXBP1,SCN2A,PDX1,TBR1,ADNP,IQSEC2,GRIN2A,GRIP1,DYRK1A,DLG4,DEPDC5,MBD5,SCN9A,UNC80,RELN,MECP2…
GO Process	GO:0030154	Cell differentiation	35	3702	0.39	9.87e-06	STX1B,PHOX2B,UBE3A,SIX3,CNTNAP1,CLCN2,GATA6,TBC1D24,GABRB3,TUBB3,FGF13,GATA4,FOXG1,TRIO,AUTS2,ANK2,CNTNAP2,POU3F3,NKX6-2,PAX2,SLC9A6,GRIN1,SPTAN1,STXBP1,PDX1,TBR1,ADNP,GRIN2A,GRIP1,DLG4,RELN,MECP2,SCN1B,SYNGAP1,GDNF
GO Process	GO:0048167	Regulation of synaptic plasticity	9	191	2023-08-01	1.05e-05	GRIN1,STXBP1,GRIN2A,DLG4,RELN,MECP2,SYNGAP1,PRRT2,GRIN2B
GO Process	GO:0032412	Regulation of ion transmembrane transporter activity	10	260	1.0	1.17e-05	KCNJ11,ANK2,RYR2,GRIN1,GRIN2A,DLG4,RELN,SCN1B,GRIN2B,GRIA3
GO Process	GO:0051960	Regulation of nervous system development	17	942	0.67	1.44e-05	STX1B,PHOX2B,UBE3A,SIX3,FGF13,OXTR,FOXG1,NKX6-2,PAX2,GRIN1,TBR1,ADNP,GRIP1,DLG4,RELN,SCN1B,SYNGAP1
GO Process	GO:0051239	Regulation of multicellular organismal process	32	3227	0.41	1.60e-05	STX1B,PHOX2B,UBE3A,SIX3,HCN4,GATA6,FLCN,HOMER2,ITPR1,KCND3,FGF13,OXTR,GATA4,FOXG1,KCNJ11,ANK2,RYR2,NKX6-2,PAX2,GRIN1,TBR1,ADNP,GRIP1,DLG4,MBD5,RELN,MECP2,SCN1B,SYNGAP1,GDNF,ATP1A3,GJA5
GO Process	GO:0061337	Cardiac conduction	7	94	1.28	1.60e-05	HCN4,KCND3,ANK2,RYR2,SCN1B,ATP1A3,GJA5
GO Process	GO:0086019	Cell-cell signaling involved in cardiac conduction	5	27	1.68	1.74e-05	HCN4,ANK2,RYR2,SCN1B,GJA5
GO Process	GO:0098901	Regulation of cardiac muscle cell action potential	5	28	1.66	2.03e-05	HCN4,FGF13,ANK2,RYR2,GJA5
GO Process	GO:0050808	Synapse organization	10	283	0.96	2.25e-05	GLRB,SLC6A1,GABRB3,FGF13,SLC9A6,DLG4,RELN,MECP2,SYNGAP1,GDNF
GO Process	GO:0060078	Regulation of postsynaptic membrane potential	7	104	1.24	2.87e-05	GLRB,GABRB3,GRIN1,GRIN2A,MECP2,GRIN2B,GRIA3
GO Process	GO:0035418	Protein localization to synapse	6	63	1.39	3.20e-05	STX1B,GRIN1,GRIN2A,GRIP1,DLG4,RELN
GO Process	GO:0043279	Response to alkaloid	7	106	1.23	3.20e-05	UBE3A,SLC6A1,HOMER2,OXTR,RYR2,GRIN1,PDX1
GO Process	GO:0045664	Regulation of neuron differentiation	14	665	0.73	3.31e-05	STX1B,PHOX2B,UBE3A,SIX3,FGF13,FOXG1,GRIN1,TBR1,ADNP,GRIP1,DLG4,RELN,SCN1B,SYNGAP1
GO Process	GO:0099565	Chemical synaptic transmission, postsynaptic	7	109	1.22	3.64e-05	GLRB,GABRB3,GRIN1,GRIN2A,MECP2,GRIN2B,GRIA3
GO Process	GO:1903779	Regulation of cardiac conduction	6	68	1.36	4.53e-05	ITPR1,KCNJ11,ANK2,RYR2,ATP1A3,GJA5
GO Process	GO:1903539	Protein localization to postsynaptic membrane	5	35	1.57	4.89e-05	STX1B,GRIN1,GRIN2A,GRIP1,DLG4
GO Process	GO:0021987	Cerebral cortex development	7	116	1.19	5.25e-05	FGF13,FOXG1,CNTNAP2,POU3F3,GRIN1,TBR1,RELN
GO Process	GO:0006936	Muscle contraction	9	248	0.97	6.90e-05	HCN4,SCN1A,KCND3,OXTR,ANK2,RYR2,SCN1B,GDNF,GJA5
GO Process	GO:0055080	Cation homeostasis	14	712	0.7	6.90e-05	UBE3A,CCDC115,ITPR1,OXTR,ANK2,CACNA1A,RYR2,SLC9A6,GRIN1,GRIN2A,DLG4,UNC80,ATP1A3,GRIN2B
GO Process	GO:0086091	Regulation of heart rate by cardiac conduction	5	38	1.53	6.90e-05	HCN4,KCND3,ANK2,SCN1B,GJA5
GO Process	GO:0050767	Regulation of neurogenesis	15	828	0.67	7.00e-05	STX1B,PHOX2B,UBE3A,SIX3,FGF13,FOXG1,NKX6-2,GRIN1,TBR1,ADNP,GRIP1,DLG4,RELN,SCN1B,SYNGAP1
GO Process	GO:0021537	Telencephalon development	9	257	0.95	8.88e-05	SIX3,FGF13,OXTR,FOXG1,CNTNAP2,POU3F3,GRIN1,TBR1,RELN
GO Process	GO:1904062	Regulation of cation transmembrane transport	10	337	0.88	8.96e-05	KCNJ11,ANK2,RYR2,GRIN1,GRIN2A,DLG4,RELN,SCN1B,GRIN2B,GRIA3
GO Process	GO:0050884	Neuromuscular process controlling posture	4	16	1.81	9.45e-05	CNTNAP1,SCN1A,MECP2,PRRT2
GO Process	GO:0030003	Cellular cation homeostasis	13	644	0.72	0.00012	UBE3A,CCDC115,ITPR1,OXTR,ANK2,CACNA1A,RYR2,SLC9A6,GRIN1,GRIN2A,DLG4,ATP1A3,GRIN2B
GO Process	GO:0007215	Glutamate receptor signaling pathway	5	45	1.46	0.00013	HOMER2,GRIN1,GRIN2A,GRIN2B,GRIA3
GO Process	GO:0009653	Anatomical structure morphogenesis	24	2165	0.46	0.00013	PHOX2B,SIX3,CNTNAP1,GATA6,TUBB3,FRAS1,GATA4,FOXG1,TRIO,AUTS2,ANK2,CNTNAP2,RYR2,PAX2,SLC9A6,SPTAN1,STXBP1,PDX1,TBR1,DLG4,RELN,SCN1B,GDNF,GJA5
GO Process	GO:0030534	Adult behavior	7	136	2023-12-01	0.00013	GLRB,SCN1A,HOMER2,CNTNAP2,GRIN1,MECP2,GDNF
GO Process	GO:0035556	Intracellular signal transduction	21	1712	0.5	0.00015	DOCK3,FLCN,HOMER2,ITPR1,FGF13,OXTR,ANK2,RYR2,PAX2,GRIN1,SPTAN1,SCN2A,PDX1,ADNP,GRIN2A,GRIP1,DLG4,DEPDC5,SYNGAP1,GDNF,GRIN2B
GO Process	GO:0045595	Regulation of cell differentiation	22	1874	0.48	0.00016	STX1B,PHOX2B,UBE3A,SIX3,GATA6,FLCN,FGF13,GATA4,FOXG1,TRIO,NKX6-2,PAX2,GRIN1,TBR1,ADNP,GRIP1,DLG4,RELN,MECP2,SCN1B,SYNGAP1,GDNF
GO Process	GO:0043270	Positive regulation of ion transport	9	285	0.91	0.00018	SLC6A1,KCNJ11,ANK2,RYR2,GRIN1,STXBP1,RELN,SCN1B,GDNF
GO Process	GO:0035176	Social behavior	5	49	1.42	0.00019	OXTR,CNTNAP2,GRIN1,DLG4,MECP2
GO Process	GO:0043524	Negative regulation of neuron apoptotic process	7	148	2023-09-01	0.00021	GABRB3,GRIN1,STXBP1,ADNP,MECP2,SYNGAP1,GDNF
GO Process	GO:0120035	Regulation of plasma membrane bounded cell projection organization	13	687	0.69	0.00023	STX1B,UBE3A,FGF13,AUTS2,GRIN1,TBR1,ADNP,GRIP1,DLG4,RELN,SCN1B,SYNGAP1,GRIN2B
GO Process	GO:0086005	Ventricular cardiac muscle cell action potential	4	22	1.67	0.00025	KCND3,ANK2,RYR2,GJA5
GO Process	GO:0002027	Regulation of heart rate	6	99	1.19	0.00028	HCN4,KCND3,ANK2,RYR2,SCN1B,GJA5
GO Process	GO:0042221	Response to chemical	35	4333	0.32	0.00030	PHOX2B,UBE3A,CCDC115,HCN4,GLRB,GATA6,SLC6A1,TBC1D24,HOMER2,GABRB3,TUBB3,OXTR,GATA4,FOXG1,TRIO,KCNJ11,ANK2,CACNA1A,RYR2,PAX2,GRIN1,SPTAN1,STXBP1,SCN2A,PDX1,ADNP,GRIN2A,GRIP1,DLG4,SCN9A,RELN,SCN1B,GDNF,ATP1A3,GRIN2B
GO Process	GO:0072657	Protein localization to membrane	11	495	0.76	0.00032	STX1B,GLRB,FGF13,ANK2,GRIN1,STXBP1,GRIN2A,GRIP1,DLG4,RELN,SYNGAP1
GO Process	GO:0006937	Regulation of muscle contraction	7	162	2023-05-01	0.00034	HCN4,FGF13,OXTR,GATA4,ANK2,RYR2,GJA5
GO Process	GO:0048513	Animal organ development	29	3197	0.37	0.00036	PHOX2B,UBE3A,SIX3,CLCN2,GATA6,FLCN,GABRB3,TUBB3,FGF13,OXTR,FRAS1,GATA4,FOXG1,ANK2,CNTNAP2,POU3F3,RYR2,NKX6-2,PAX2,GRIN1,PCDH19,PDX1,TBR1,GRIN2A,RELN,MECP2,GDNF,GRIN2B,GJA5
GO Process	GO:0019722	Calcium-mediated signaling	7	165	2023-04-01	0.00037	HOMER2,ITPR1,ANK2,RYR2,GRIN1,GRIN2A,GRIN2B
GO Process	GO:0086068	Purkinje myocyte to ventricular cardiac muscle cell communication	3	6	2023-11-02	0.00037	RYR2,SCN1B,GJA5
GO Process	GO:0098771	Inorganic ion homeostasis	13	723	0.67	0.00037	UBE3A,CCDC115,ITPR1,OXTR,ANK2,CACNA1A,RYR2,SLC9A6,GRIN1,GRIN2A,DLG4,ATP1A3,GRIN2B
GO Process	GO:0098910	Regulation of atrial cardiac muscle cell action potential	3	6	2023-11-02	0.00037	ANK2,RYR2,GJA5
GO Process	GO:1990778	Protein localization to cell periphery	8	237	0.94	0.00038	STX1B,FGF13,ANK2,GRIN1,STXBP1,GRIN2A,GRIP1,DLG4
GO Process	GO:0010975	Regulation of neuron projection development	11	510	0.74	0.00039	STX1B,UBE3A,FGF13,GRIN1,TBR1,ADNP,GRIP1,DLG4,RELN,SCN1B,SYNGAP1
GO Process	GO:0050803	Regulation of synapse structure or activity	8	239	0.94	0.00039	STX1B,UBE3A,OXTR,GRIN1,ADNP,RELN,SYNGAP1,GRIN2B
GO Process	GO:0016358	Dendrite development	6	112	1.14	0.00050	SLC9A6,GRIP1,DLG4,RELN,MECP2,SYNGAP1
GO Process	GO:0001941	Postsynaptic membrane organization	4	28	1.57	0.00052	GLRB,DLG4,RELN,GDNF
GO Process	GO:2000463	Positive regulation of excitatory postsynaptic potential	4	28	1.57	0.00052	STX1B,GRIN1,DLG4,RELN
GO Process	GO:0060079	Excitatory postsynaptic potential	5	64	2023-03-01	0.00053	GLRB,GRIN1,GRIN2A,MECP2,GRIN2B
GO Process	GO:0001964	Startle response	4	29	1.55	0.00058	GLRB,GRIN1,GRIN2A,MECP2
GO Process	GO:0019228	Neuronal action potential	4	30	1.54	0.00066	SCN1A,SCN8A,SCN2A,SCN9A
GO Process	GO:0086015	SA node cell action potential	3	8	1.98	0.00066	HCN4,ANK2,GJA5
GO Process	GO:0098739	Import across plasma membrane	6	119	2023-11-01	0.00066	HCN4,SLC6A1,KCNJ11,SLC9A6,SLC6A5,ATP1A3
GO Process	GO:2000026	Regulation of multicellular organismal development	22	2096	0.43	0.00077	STX1B,PHOX2B,UBE3A,SIX3,GATA6,FLCN,FGF13,OXTR,GATA4,FOXG1,NKX6-2,PAX2,GRIN1,TBR1,ADNP,GRIP1,DLG4,RELN,MECP2,SCN1B,SYNGAP1,GDNF
GO Process	GO:0019932	Second-messenger-mediated signaling	9	354	0.82	0.00079	HOMER2,ITPR1,ANK2,RYR2,GRIN1,PDX1,ADNP,GRIN2A,GRIN2B
GO Process	GO:0019227	Neuronal action potential propagation	3	9	1.93	0.00086	CNTNAP1,SCN1A,SCN1B
GO Process	GO:0072578	Neurotransmitter-gated ion channel clustering	3	9	1.93	0.00086	GLRB,DLG4,RELN
GO Process	GO:0098976	Excitatory chemical synaptic transmission	3	9	1.93	0.00086	GRIN1,GRIN2A,GRIN2B
GO Process	GO:0006875	Cellular metal ion homeostasis	11	565	0.7	0.00089	CCDC115,ITPR1,OXTR,ANK2,CACNA1A,RYR2,GRIN1,GRIN2A,DLG4,ATP1A3,GRIN2B
GO Process	GO:0007626	Locomotory behavior	7	194	0.97	0.00089	GLRB,SCN1A,GRIN1,DLG4,RELN,MECP2,GDNF
GO Process	GO:0016043	Cellular component organization	39	5447	0.27	0.00093	STX1B,PHOX2B,CCDC115,GLRB,CNTNAP1,POGZ,FLCN,SLC6A1,TBC1D24,COG7,GABRB3,KCND3,TUBB3,FGF13,KPTN,FOXG1,TRIO,AUTS2,ANK2,CNTNAP2,PAX2,SLC9A6,GRIN1,SPTAN1,STXBP1,ADNP,IQSEC2,GRIP1,DLG4,RELN,MECP2,SCN1B,SYNGAP1,GDNF,ATP1A3,PRRT2,GFAP,GRIN2B,GJA5
GO Process	GO:0048598	Embryonic morphogenesis	11	571	0.7	0.00097	SIX3,GATA6,FRAS1,GATA4,FOXG1,RYR2,PAX2,PDX1,TBR1,GDNF,GJA5
GO Process	GO:0051046	Regulation of secretion	12	686	0.65	0.00097	STX1B,SLC6A1,ABCC8,ITPR1,OXTR,KCNJ11,CACNA1A,STXBP1,PDX1,GDNF,PRRT2,GJA5
GO Process	GO:0006928	Movement of cell or subcellular component	18	1501	0.49	0.00099	PHOX2B,SIX3,SCN1A,KCND3,TUBB3,FGF13,FOXG1,TRIO,BRAT1,AUTS2,ANK2,POU3F3,RYR2,SPTAN1,RELN,SCN1B,GDNF,GJA5
GO Process	GO:0008344	Adult locomotory behavior	5	75	1.23	0.00099	GLRB,SCN1A,GRIN1,MECP2,GDNF
GO Process	GO:0019233	Sensory perception of pain	5	78	1.22	0.0012	SCN1A,GRIN1,GRIN2A,SCN9A,MECP2
GO Process	GO:0050768	Negative regulation of neurogenesis	8	287	0.86	0.0012	STX1B,PHOX2B,UBE3A,SIX3,FGF13,FOXG1,NKX6-2,SYNGAP1
GO Process	GO:0097553	Calcium ion transmembrane import into cytosol	5	78	1.22	0.0012	ITPR1,RYR2,GRIN1,GRIN2A,GRIN2B
GO Process	GO:0007204	Positive regulation of cytosolic calcium ion concentration	8	297	0.84	0.0015	ITPR1,OXTR,CACNA1A,RYR2,GRIN1,GRIN2A,DLG4,GRIN2B
GO Process	GO:0051716	Cellular response to stimulus	43	6489	0.23	0.0015	PHOX2B,UBE3A,CCDC115,HCN4,GLRB,CNTNAP1,DOCK3,GATA6,FLCN,TBC1D24,HOMER2,ITPR1,GABRB3,TUBB3,FGF13,OXTR,GATA4,KPTN,TRIO,BRAT1,KCNJ11,ANK2,CACNA1A,RYR2,PAX2,SLC9A6,GRIN1,SPTAN1,STXBP1,SCN2A,PDX1,ADNP,GRIN2A,GRIP1,DLG4,DEPDC5,RELN,MECP2,SYNGAP1,GDNF,ATP1A3,GRIN2B,GRIA3
GO Process	GO:0051954	Positive regulation of amine transport	4	39	1.42	0.0015	SLC6A1,OXTR,STXBP1,GDNF
GO Process	GO:0065009	Regulation of molecular function	36	4913	0.28	0.0015	PHOX2B,UBE3A,SIX3,DOCK3,GATA6,FLCN,TBC1D24,ITPR1,CC2D1A,FGF13,GATA4,FOXG1,TRIO,KCNJ11,ANK2,POU3F3,RYR2,NKX6-2,PAX2,GRIN1,PDX1,TBR1,ADNP,IQSEC2,GRIN2A,GRIP1,DYRK1A,DLG4,DEPDC5,RELN,MECP2,SCN1B,SYNGAP1,GDNF,GRIN2B,GRIA3
GO Process	GO:0008015	Blood circulation	9	394	0.77	0.0016	HCN4,SCN1A,KCND3,OXTR,ANK2,RYR2,MECP2,SCN1B,GJA5
GO Process	GO:0010243	Response to organonitrogen compound	14	987	0.56	0.0016	UBE3A,HCN4,GLRB,SLC6A1,HOMER2,GABRB3,OXTR,KCNJ11,CACNA1A,RYR2,GRIN1,PDX1,GRIN2A,ATP1A3
GO Process	GO:0035249	Synaptic transmission, glutamatergic	4	40	1.41	0.0016	GRIN1,GRIN2A,GRIN2B,GRIA3
GO Process	GO:0098659	Inorganic cation import across plasma membrane	5	84	1.19	0.0016	HCN4,SLC6A1,KCNJ11,SLC9A6,ATP1A3
GO Process	GO:1901700	Response to oxygen-containing compound	18	1567	0.47	0.0016	UBE3A,HCN4,GLRB,SLC6A1,HOMER2,OXTR,GATA4,KCNJ11,CACNA1A,RYR2,PAX2,GRIN1,STXBP1,PDX1,ADNP,GRIN2A,ATP1A3,GRIN2B
GO Process	GO:0021795	Cerebral cortex cell migration	4	42	1.39	0.0018	FGF13,FOXG1,POU3F3,RELN
GO Process	GO:0045665	Negative regulation of neuron differentiation	7	222	0.91	0.0018	STX1B,PHOX2B,UBE3A,SIX3,FGF13,FOXG1,SYNGAP1
GO Process	GO:0048519	Negative regulation of biological process	38	5389	0.26	0.0018	STX1B,PHOX2B,UBE3A,SIX3,GATA6,FLCN,SLC6A1,HOMER2,ITPR1,GABRB3,CC2D1A,FGF13,OXTR,GATA4,KPTN,FOXG1,TRIO,KCNJ11,POU3F3,RYR2,NKX6-2,PAX2,GRIN1,SPTAN1,STXBP1,PDX1,TBR1,ADNP,GRIN2A,DYRK1A,DLG4,DEPDC5,MECP2,SYNGAP1,GDNF,PRRT2,GRIN2B,GJA5
GO Process	GO:0097120	Receptor localization to synapse	4	42	1.39	0.0018	STX1B,GRIP1,DLG4,RELN
GO Process	GO:0099173	Postsynapse organization	5	88	1.17	0.0018	GLRB,DLG4,RELN,SYNGAP1,GDNF
GO Process	GO:0051641	Cellular localization	26	2967	0.35	0.0019	STX1B,IER3IP1,SIX3,GLRB,CNTNAP1,FLCN,SLC6A1,COG7,ITPR1,KCND3,FGF13,KPTN,BRAT1,ANK2,CNTNAP2,RYR2,GRIN1,SPTAN1,STXBP1,GRIN2A,GRIP1,DLG4,RELN,SYNGAP1,PRRT2,GRIN2B
GO Process	GO:1903530	Regulation of secretion by cell	11	630	0.65	0.0020	STX1B,ABCC8,ITPR1,OXTR,KCNJ11,CACNA1A,STXBP1,PDX1,GDNF,PRRT2,GJA5
GO Process	GO:0050896	Response to stimulus	49	8046	0.2	0.0021	PHOX2B,UBE3A,CCDC115,HCN4,GLRB,CNTNAP1,DOCK3,GATA6,FLCN,SLC6A1,TBC1D24,SCN1A,HOMER2,ITPR1,GABRB3,TUBB3,FGF13,OXTR,GATA4,KPTN,FOXG1,TRIO,BRAT1,KCNJ11,ANK2,CACNA1A,CNTNAP2,RYR2,PAX2,SLC9A6,GRIN1,SPTAN1,STXBP1,SCN2A,PDX1,ADNP,GRIN2A,GRIP1,DLG4,DEPDC5,SCN9A,RELN,MECP2,SCN1B,SYNGAP1,GDNF,ATP1A3,GRIN2B,GRIA3
GO Process	GO:0060291	Long-term synaptic potentiation	4	44	1.37	0.0021	GRIN2A,RELN,MECP2,GRIN2B
GO Process	GO:1901214	Regulation of neuron death	8	317	0.81	0.0021	GABRB3,GRIN1,STXBP1,ADNP,MECP2,SYNGAP1,GDNF,GRIN2B
GO Process	GO:0060341	Regulation of cellular localization	14	1027	0.55	0.0023	STX1B,FLCN,ITPR1,KCNJ11,ANK2,RYR2,GRIN1,STXBP1,PDX1,IQSEC2,SCN1B,GDNF,PRRT2,GJA5
GO Process	GO:0050793	Regulation of developmental process	24	2648	0.37	0.0024	STX1B,PHOX2B,UBE3A,SIX3,GATA6,FLCN,FGF13,OXTR,GATA4,FOXG1,TRIO,NKX6-2,PAX2,GRIN1,TBR1,ADNP,GRIP1,DLG4,MBD5,RELN,MECP2,SCN1B,SYNGAP1,GDNF
GO Process	GO:0008542	Visual learning	4	47	1.34	0.0026	GRIN1,GRIN2A,MECP2,SYNGAP1
GO Process	GO:0021700	Developmental maturation	7	238	0.88	0.0026	SIX3,CNTNAP2,PAX2,GRIN1,STXBP1,DLG4,MECP2
GO Process	GO:0009605	Response to external stimulus	22	2310	0.39	0.0027	GLRB,FLCN,SCN1A,TUBB3,GATA4,KPTN,FOXG1,TRIO,CNTNAP2,RYR2,PAX2,GRIN1,SPTAN1,STXBP1,PDX1,ADNP,GRIN2A,DEPDC5,RELN,MECP2,SCN1B,GDNF
GO Process	GO:0014070	Response to organic cyclic compound	13	911	0.57	0.0027	UBE3A,HCN4,SLC6A1,HOMER2,GABRB3,OXTR,KCNJ11,RYR2,GRIN1,STXBP1,PDX1,GRIP1,ATP1A3
GO Process	GO:0042220	Response to cocaine	4	48	1.33	0.0027	UBE3A,SLC6A1,HOMER2,OXTR
GO Process	GO:0043113	Receptor clustering	4	48	1.33	0.0027	GLRB,DLG4,RELN,SYNGAP1
GO Process	GO:0086064	Cell communication by electrical coupling involved in cardiac conduction	3	16	1.68	0.0028	RYR2,ATP1A3,GJA5
GO Process	GO:0098657	Import into cell	6	164	0.97	0.0028	HCN4,SLC6A1,KCNJ11,SLC9A6,SLC6A5,ATP1A3
GO Process	GO:0048523	Negative regulation of cellular process	35	4874	0.27	0.0029	STX1B,PHOX2B,UBE3A,SIX3,GATA6,FLCN,SLC6A1,HOMER2,ITPR1,GABRB3,CC2D1A,FGF13,GATA4,KPTN,FOXG1,TRIO,KCNJ11,POU3F3,RYR2,NKX6-2,PAX2,GRIN1,SPTAN1,STXBP1,PDX1,TBR1,ADNP,DYRK1A,DLG4,DEPDC5,MECP2,SYNGAP1,GDNF,PRRT2,GRIN2B
GO Process	GO:0010647	Positive regulation of cell communication	19	1823	0.43	0.0030	STX1B,UBE3A,FLCN,CC2D1A,OXTR,GATA4,AUTS2,GRIN1,STXBP1,PDX1,GRIN2A,DLG4,MBD5,RELN,MECP2,GDNF,PRRT2,GRIN2B,GJA5
GO Process	GO:0051050	Positive regulation of transport	13	923	0.56	0.0030	STX1B,SLC6A1,OXTR,KCNJ11,ANK2,RYR2,GRIN1,STXBP1,PDX1,RELN,SCN1B,GDNF,PRRT2
GO Process	GO:0051962	Positive regulation of nervous system development	10	547	0.67	0.0030	PHOX2B,OXTR,FOXG1,NKX6-2,PAX2,ADNP,GRIP1,DLG4,RELN,SCN1B
GO Process	GO:0045165	Cell fate commitment	7	248	0.86	0.0031	GATA6,FGF13,GATA4,FOXG1,NKX6-2,PAX2,TBR1
GO Process	GO:0006874	Cellular calcium ion homeostasis	9	442	0.72	0.0032	ITPR1,OXTR,ANK2,CACNA1A,RYR2,GRIN1,GRIN2A,DLG4,GRIN2B
GO Process	GO:0086012	Membrane depolarization during cardiac muscle cell action potential	3	17	1.66	0.0032	HCN4,ANK2,SCN1B
GO Process	GO:0048522	Positive regulation of cellular process	38	5579	0.24	0.0034	STX1B,PHOX2B,UBE3A,SIX3,DOCK3,GATA6,FLCN,CC2D1A,FGF13,OXTR,GATA4,FOXG1,TRIO,BRAT1,AUTS2,KCNJ11,ANK2,POU3F3,RYR2,NKX6-2,PAX2,GRIN1,STXBP1,PDX1,TBR1,ADNP,GRIN2A,GRIP1,DYRK1A,DLG4,MBD5,RELN,MECP2,SCN1B,GDNF,PRRT2,GRIN2B,GJA5
GO Process	GO:0009743	Response to carbohydrate	6	174	0.95	0.0037	SLC6A1,GATA4,KCNJ11,PAX2,PDX1,ADNP
GO Process	GO:0051241	Negative regulation of multicellular organismal process	15	1231	0.5	0.0037	STX1B,PHOX2B,UBE3A,SIX3,GATA6,FLCN,HOMER2,FGF13,OXTR,FOXG1,NKX6-2,PAX2,MECP2,SYNGAP1,GJA5
GO Process	GO:0072202	Cell differentiation involved in metanephros development	3	18	1.63	0.0037	POU3F3,PAX2,GDNF
GO Process	GO:0006816	Calcium ion transport	7	259	0.84	0.0039	ITPR1,ANK2,CACNA1A,RYR2,GRIN1,GRIN2A,GRIN2B
GO Process	GO:0022603	Regulation of anatomical structure morphogenesis	14	1095	0.52	0.0040	UBE3A,GATA6,FGF13,GATA4,PAX2,GRIN1,TBR1,ADNP,GRIP1,DLG4,RELN,MECP2,SYNGAP1,GDNF
GO Process	GO:0098719	Sodium ion import across plasma membrane	3	19	1.61	0.0041	HCN4,SLC6A1,SLC9A6
GO Process	GO:0051128	Regulation of cellular component organization	22	2402	0.37	0.0043	STX1B,UBE3A,FLCN,FGF13,OXTR,BRAT1,AUTS2,GRIN1,SPTAN1,STXBP1,TBR1,ADNP,GRIP1,DYRK1A,DLG4,RELN,MECP2,SCN1B,SYNGAP1,PRRT2,GFAP,GRIN2B
GO Process	GO:0042552	Myelination	5	111	2023-06-01	0.0044	CNTNAP1,SCN8A,ANK2,NKX6-2,SCN2A
GO Process	GO:0098907	Regulation of sa node cell action potential	2	2	2.41	0.0044	ANK2,RYR2
GO Process	GO:0051129	Negative regulation of cellular component organization	11	713	0.6	0.0050	STX1B,UBE3A,FLCN,FGF13,SPTAN1,STXBP1,DYRK1A,DLG4,SYNGAP1,PRRT2,GRIN2B
GO Process	GO:0000165	MAPK cascade	8	370	0.75	0.0051	FGF13,OXTR,GRIN1,SPTAN1,DLG4,SYNGAP1,GDNF,GRIN2B
GO Process	GO:0045893	Positive regulation of transcription, dna-templated	17	1587	0.44	0.0052	PHOX2B,UBE3A,SIX3,GATA6,FLCN,GATA4,AUTS2,POU3F3,NKX6-2,PAX2,GRIN1,PDX1,TBR1,GRIP1,DYRK1A,MECP2,GDNF
GO Process	GO:0007411	Axon guidance	7	275	0.82	0.0053	TUBB3,FOXG1,TRIO,SPTAN1,RELN,SCN1B,GDNF
GO Process	GO:0034329	Cell junction assembly	7	280	0.81	0.0058	CNTNAP1,FLCN,GABRB3,FGF13,ANK2,MECP2,GJA5
GO Process	GO:0045596	Negative regulation of cell differentiation	11	728	0.59	0.0058	STX1B,PHOX2B,UBE3A,SIX3,FLCN,FGF13,FOXG1,TRIO,NKX6-2,MECP2,SYNGAP1
GO Process	GO:0060307	Regulation of ventricular cardiac muscle cell membrane repolarization	3	22	1.55	0.0058	ANK2,SCN1B,GJA5
GO Process	GO:0009628	Response to abiotic stimulus	14	1147	0.5	0.0061	CCDC115,GATA6,SCN1A,ITPR1,OXTR,GATA4,BRAT1,CNTNAP2,RYR2,GRIN1,SCN2A,GRIN2A,MECP2,SYNGAP1
GO Process	GO:0034613	Cellular protein localization	17	1610	0.43	0.0061	STX1B,SIX3,GLRB,CNTNAP1,COG7,FGF13,KPTN,ANK2,CNTNAP2,RYR2,GRIN1,STXBP1,GRIN2A,GRIP1,DLG4,RELN,SYNGAP1
GO Process	GO:0003283	Atrial septum development	3	23	1.53	0.0063	GATA4,ANK2,GJA5
GO Process	GO:0043576	Regulation of respiratory gaseous exchange	3	23	1.53	0.0063	PHOX2B,GRIN1,MECP2
GO Process	GO:0001764	Neuron migration	5	123	2023-02-01	0.0064	PHOX2B,FGF13,FOXG1,AUTS2,RELN
GO Process	GO:0022604	Regulation of cell morphogenesis	9	498	0.67	0.0067	UBE3A,FGF13,GRIN1,TBR1,ADNP,GRIP1,DLG4,RELN,SYNGAP1
GO Process	GO:0098904	Regulation of av node cell action potential	2	3	2.23	0.0067	RYR2,GJA5
GO Process	GO:0001956	Positive regulation of neurotransmitter secretion	3	24	1.51	0.0069	STX1B,STXBP1,PRRT2
GO Process	GO:0008104	Protein localization	20	2139	0.38	0.0069	STX1B,SIX3,GLRB,CNTNAP1,COG7,FGF13,FRAS1,KPTN,ANK2,CNTNAP2,RYR2,GRIN1,STXBP1,PDX1,GRIN2A,GRIP1,DLG4,RELN,MECP2,SYNGAP1
GO Process	GO:0048169	Regulation of long-term neuronal synaptic plasticity	3	24	1.51	0.0069	GRIN1,DLG4,SYNGAP1
GO Process	GO:0043066	Negative regulation of apoptotic process	12	893	0.54	0.0078	GATA6,GABRB3,GATA4,POU3F3,PAX2,GRIN1,STXBP1,PDX1,ADNP,MECP2,SYNGAP1,GDNF
GO Process	GO:0051968	Positive regulation of synaptic transmission, glutamatergic	3	26	1.47	0.0084	OXTR,STXBP1,RELN
GO Process	GO:0023056	Positive regulation of signaling	18	1831	0.4	0.0085	STX1B,UBE3A,FLCN,CC2D1A,OXTR,GATA4,AUTS2,GRIN1,STXBP1,PDX1,GRIN2A,DLG4,MBD5,RELN,MECP2,GDNF,PRRT2,GRIN2B
GO Process	GO:0009966	Regulation of signal transduction	25	3107	0.32	0.0087	STX1B,UBE3A,SIX3,FLCN,HOMER2,ITPR1,CC2D1A,GATA4,KPTN,TRIO,AUTS2,SLC9A6,GRIN1,PDX1,IQSEC2,GRIN2A,DYRK1A,DLG4,DEPDC5,MBD5,RELN,SYNGAP1,GDNF,GRIN2B,GRIA3
GO Process	GO:0010769	Regulation of cell morphogenesis involved in differentiation	7	309	0.77	0.0095	UBE3A,FGF13,GRIN1,TBR1,ADNP,RELN,SYNGAP1
GO Process	GO:0048518	Positive regulation of biological process	39	6112	0.22	0.0095	STX1B,PHOX2B,UBE3A,SIX3,DOCK3,GATA6,FLCN,SLC6A1,CC2D1A,FGF13,OXTR,GATA4,FOXG1,TRIO,BRAT1,AUTS2,KCNJ11,ANK2,POU3F3,RYR2,NKX6-2,PAX2,GRIN1,STXBP1,PDX1,TBR1,ADNP,GRIN2A,GRIP1,DYRK1A,DLG4,MBD5,RELN,MECP2,SCN1B,GDNF,PRRT2,GRIN2B,GJA5
GO Process	GO:0072108	Positive regulation of mesenchymal to epithelial transition involved in metanephros morphogenesis	2	4	2023-11-02	0.0095	PAX2,GDNF
GO Process	GO:0003338	Metanephros morphogenesis	3	28	1.44	0.0099	FRAS1,PAX2,GDNF
GO Process	GO:0010941	Regulation of cell death	17	1696	0.41	0.0102	IER3IP1,GATA6,FLCN,GABRB3,GATA4,TRIO,POU3F3,PAX2,GRIN1,STXBP1,PDX1,ADNP,GRIN2A,MECP2,SYNGAP1,GDNF,GRIN2B
GO Process	GO:0003300	Cardiac muscle hypertrophy	3	29	1.43	0.0108	GATA6,GATA4,RYR2
GO Process	GO:0010648	Negative regulation of cell communication	15	1382	0.45	0.0109	SIX3,FLCN,SLC6A1,HOMER2,ITPR1,GATA4,KPTN,KCNJ11,STXBP1,PDX1,ADNP,DYRK1A,DEPDC5,SYNGAP1,GDNF
GO Process	GO:0023057	Negative regulation of signaling	15	1385	0.45	0.0111	SIX3,FLCN,SLC6A1,HOMER2,ITPR1,GATA4,KPTN,KCNJ11,STXBP1,PDX1,ADNP,DYRK1A,DEPDC5,SYNGAP1,GDNF
GO Process	GO:0042981	Regulation of apoptotic process	16	1550	0.42	0.0114	IER3IP1,GATA6,FLCN,GABRB3,GATA4,TRIO,POU3F3,PAX2,GRIN1,STXBP1,PDX1,ADNP,GRIN2A,MECP2,SYNGAP1,GDNF
GO Process	GO:0042063	Gliogenesis	6	228	0.83	0.0122	PHOX2B,CNTNAP1,FOXG1,NKX6-2,PAX2,RELN
GO Process	GO:0050807	Regulation of synapse organization	6	228	0.83	0.0122	UBE3A,OXTR,GRIN1,ADNP,RELN,GRIN2B
GO Process	GO:0007389	Pattern specification process	8	432	0.68	0.0123	SIX3,GATA4,FOXG1,NKX6-2,PAX2,TBR1,RELN,SYNGAP1
GO Process	GO:0001661	Conditioned taste aversion	2	5	2023-01-02	0.0126	GRIN1,TBR1
GO Process	GO:0021799	Cerebral cortex radially oriented cell migration	3	31	2023-04-01	0.0126	FOXG1,POU3F3,RELN
GO Process	GO:0040011	Locomotion	14	1251	0.46	0.0126	PHOX2B,SIX3,TUBB3,FGF13,FOXG1,TRIO,BRAT1,AUTS2,POU3F3,SPTAN1,GRIN2A,RELN,SCN1B,GDNF
GO Process	GO:0071205	Protein localization to juxtaparanode region of axon	2	5	2023-01-02	0.0126	CNTNAP1,CNTNAP2
GO Process	GO:0072221	Metanephric distal convoluted tubule development	2	5	2023-01-02	0.0126	POU3F3,PAX2
GO Process	GO:0086029	Purkinje myocyte to ventricular cardiac muscle cell signaling	2	5	2023-01-02	0.0126	RYR2,SCN1B
GO Process	GO:0086046	Membrane depolarization during sa node cell action potential	2	5	2023-01-02	0.0126	HCN4,ANK2
GO Process	GO:0035050	Embryonic heart tube development	4	80	2023-11-01	0.0127	GATA4,RYR2,TBR1,GJA5
GO Process	GO:0045944	Positive regulation of transcription by rna polymerase ii	14	1253	0.46	0.0127	PHOX2B,UBE3A,SIX3,GATA6,FLCN,GATA4,AUTS2,POU3F3,NKX6-2,PAX2,GRIN1,PDX1,TBR1,GDNF
GO Process	GO:0003002	Regionalization	7	332	0.73	0.0134	SIX3,GATA4,FOXG1,NKX6-2,PAX2,TBR1,RELN
GO Process	GO:0001656	Metanephros development	4	84	2023-09-01	0.0148	FRAS1,POU3F3,PAX2,GDNF
GO Process	GO:0033036	Macromolecule localization	21	2473	0.34	0.0148	STX1B,SIX3,GLRB,CNTNAP1,COG7,RBFOX1,FGF13,FRAS1,KPTN,ANK2,CNTNAP2,RYR2,GRIN1,STXBP1,PDX1,GRIN2A,GRIP1,DLG4,RELN,MECP2,SYNGAP1
GO Process	GO:0048568	Embryonic organ development	8	448	0.66	0.0148	SIX3,GATA4,FOXG1,RYR2,PAX2,TBR1,GDNF,GJA5
GO Process	GO:0051173	Positive regulation of nitrogen compound metabolic process	25	3239	0.3	0.0148	PHOX2B,UBE3A,SIX3,DOCK3,GATA6,FLCN,FGF13,GATA4,BRAT1,AUTS2,POU3F3,NKX6-2,PAX2,GRIN1,PDX1,TBR1,ADNP,GRIN2A,GRIP1,DYRK1A,DLG4,RELN,MECP2,GDNF,GRIN2B
GO Process	GO:0051047	Positive regulation of secretion	7	340	0.72	0.0152	STX1B,SLC6A1,OXTR,STXBP1,PDX1,GDNF,PRRT2
GO Process	GO:0001975	Response to amphetamine	3	34	1.36	0.0153	OXTR,GRIN1,GRIN2A
GO Process	GO:0007616	Long-term memory	3	34	1.36	0.0153	GRIN1,RELN,MECP2
GO Process	GO:0051240	Positive regulation of multicellular organismal process	17	1770	0.39	0.0153	STX1B,PHOX2B,GATA6,OXTR,GATA4,FOXG1,RYR2,NKX6-2,PAX2,GRIN1,ADNP,GRIP1,DLG4,RELN,SCN1B,GDNF,GJA5
GO Process	GO:0048863	Stem cell differentiation	5	156	0.92	0.0155	PHOX2B,SIX3,PAX2,PDX1,GDNF
GO Process	GO:0003284	Septum primum development	2	6	1.93	0.0156	GATA4,GJA5
GO Process	GO:0051891	Positive regulation of cardioblast differentiation	2	6	1.93	0.0156	GATA6,GATA4
GO Process	GO:0060012	Synaptic transmission, glycinergic	2	6	1.93	0.0156	GLRB,SLC6A5
GO Process	GO:0051093	Negative regulation of developmental process	12	983	0.5	0.0157	STX1B,PHOX2B,UBE3A,SIX3,FLCN,FGF13,FOXG1,TRIO,NKX6-2,PAX2,MECP2,SYNGAP1
GO Process	GO:0045597	Positive regulation of cell differentiation	12	993	0.49	0.0171	PHOX2B,GATA6,GATA4,FOXG1,NKX6-2,PAX2,ADNP,GRIP1,DLG4,RELN,SCN1B,GDNF
GO Process	GO:0032228	Regulation of synaptic transmission, gabaergic	3	36	1.33	0.0173	SLC6A1,OXTR,STXBP1
GO Process	GO:0048645	Animal organ formation	3	36	1.33	0.0173	GATA6,PAX2,TBR1
GO Process	GO:0009790	Embryo development	12	1002	0.49	0.0182	SIX3,GATA6,FLCN,FRAS1,GATA4,FOXG1,RYR2,PAX2,PDX1,TBR1,GDNF,GJA5
GO Process	GO:0030029	Actin filament-based process	9	592	0.59	0.0188	SCN1A,KCND3,KPTN,AUTS2,ANK2,RYR2,IQSEC2,SCN1B,GJA5
GO Process	GO:0010807	Regulation of synaptic vesicle priming	2	7	1.87	0.0193	STX1B,STXBP1
GO Process	GO:0030913	Paranodal junction assembly	2	7	1.87	0.0193	CNTNAP1,ANK2
GO Process	GO:0032229	Negative regulation of synaptic transmission, gabaergic	2	7	1.87	0.0193	SLC6A1,STXBP1
GO Process	GO:0060290	Transdifferentiation	2	7	1.87	0.0193	GATA4,PDX1
GO Process	GO:0060371	Regulation of atrial cardiac muscle cell membrane depolarization	2	7	1.87	0.0193	SCN1B,GJA5
GO Process	GO:0031018	Endocrine pancreas development	3	39	2023-03-01	0.0208	GATA6,NKX6-2,PDX1
GO Process	GO:1903432	Regulation of torc1 signaling	3	39	2023-03-01	0.0208	FLCN,KPTN,DEPDC5
GO Process	GO:0050769	Positive regulation of neurogenesis	8	479	0.63	0.0210	PHOX2B,FOXG1,NKX6-2,ADNP,GRIP1,DLG4,RELN,SCN1B
GO Process	GO:0003205	Cardiac chamber development	5	171	0.88	0.0217	GATA6,GATA4,ANK2,RYR2,GJA5
GO Process	GO:0044093	Positive regulation of molecular function	17	1842	0.38	0.0222	DOCK3,FLCN,TBC1D24,FGF13,KCNJ11,ANK2,RYR2,GRIN1,PDX1,ADNP,GRIN2A,DLG4,DEPDC5,RELN,SYNGAP1,GDNF,GRIN2B
GO Process	GO:0003337	Mesenchymal to epithelial transition involved in metanephros morphogenesis	2	8	1.81	0.0233	PAX2,GDNF
GO Process	GO:0032006	Regulation of tor signaling	4	98	2023-02-01	0.0233	FLCN,KPTN,DEPDC5,RELN
GO Process	GO:0098909	Regulation of cardiac muscle cell action potential involved in regulation of contraction	2	8	1.81	0.0233	HCN4,FGF13
GO Process	GO:0150012	Positive regulation of neuron projection arborization	2	8	1.81	0.0233	GRIP1,DLG4
GO Process	GO:0001709	Cell fate determination	3	42	1.26	0.0247	GATA6,FOXG1,PAX2
GO Process	GO:0045666	Positive regulation of neuron differentiation	7	377	0.68	0.0248	PHOX2B,FOXG1,ADNP,GRIP1,DLG4,RELN,SCN1B
GO Process	GO:0010001	Glial cell differentiation	5	178	0.86	0.0251	PHOX2B,CNTNAP1,NKX6-2,PAX2,RELN
GO Process	GO:0070482	Response to oxygen levels	7	379	0.68	0.0255	CCDC115,GATA6,ITPR1,OXTR,RYR2,SCN2A,MECP2
GO Process	GO:0032007	Negative regulation of tor signaling	3	43	1.25	0.0260	FLCN,KPTN,DEPDC5
GO Process	GO:1990573	Potassium ion import across plasma membrane	3	43	1.25	0.0260	HCN4,KCNJ11,ATP1A3
GO Process	GO:0031345	Negative regulation of cell projection organization	5	181	0.85	0.0267	STX1B,UBE3A,FGF13,SYNGAP1,GRIN2B
GO Process	GO:0010604	Positive regulation of macromolecule metabolic process	26	3600	0.27	0.0269	PHOX2B,UBE3A,SIX3,DOCK3,GATA6,FLCN,FGF13,GATA4,BRAT1,AUTS2,ANK2,POU3F3,NKX6-2,PAX2,GRIN1,PDX1,TBR1,ADNP,GRIN2A,GRIP1,DYRK1A,DLG4,RELN,MECP2,GDNF,GRIN2B
GO Process	GO:0050796	Regulation of insulin secretion	5	182	0.85	0.0272	ABCC8,ITPR1,KCNJ11,CACNA1A,PDX1
GO Process	GO:0021953	Central nervous system neuron differentiation	5	183	0.85	0.0277	PHOX2B,FOXG1,NKX6-2,TBR1,SCN1B
GO Process	GO:0010033	Response to organic substance	23	3011	0.29	0.0281	PHOX2B,UBE3A,HCN4,GLRB,GATA6,SLC6A1,HOMER2,GABRB3,OXTR,GATA4,KCNJ11,ANK2,CACNA1A,RYR2,PAX2,GRIN1,STXBP1,PDX1,ADNP,GRIN2A,GRIP1,ATP1A3,GRIN2B
GO Process	GO:0031325	Positive regulation of cellular metabolic process	25	3413	0.28	0.0284	PHOX2B,UBE3A,SIX3,DOCK3,GATA6,FLCN,FGF13,GATA4,BRAT1,AUTS2,POU3F3,NKX6-2,PAX2,GRIN1,PDX1,TBR1,ADNP,GRIN2A,GRIP1,DYRK1A,DLG4,RELN,MECP2,GDNF,GRIN2B
GO Process	GO:0003254	Regulation of membrane depolarization	3	45	1.23	0.0286	HCN4,SCN1B,GJA5
GO Process	GO:0032414	Positive regulation of ion transmembrane transporter activity	4	105	0.99	0.0286	KCNJ11,ANK2,RYR2,RELN
GO Process	GO:0034198	Cellular response to amino acid starvation	3	45	1.23	0.0286	FLCN,KPTN,DEPDC5
GO Process	GO:1902532	Negative regulation of intracellular signal transduction	8	508	0.61	0.0286	FLCN,HOMER2,ITPR1,KPTN,PDX1,DYRK1A,DEPDC5,SYNGAP1
GO Process	GO:0032970	Regulation of actin filament-based process	7	390	0.66	0.0288	HCN4,FGF13,GATA4,ANK2,RYR2,SPTAN1,GJA5
GO Process	GO:0050770	Regulation of axonogenesis	5	187	0.84	0.0298	FGF13,GRIN1,TBR1,ADNP,SYNGAP1
GO Process	GO:0042593	Glucose homeostasis	5	188	0.84	0.0303	GATA4,KCNJ11,PAX2,PDX1,MBD5
GO Process	GO:0021761	Limbic system development	4	109	0.98	0.0319	FGF13,CNTNAP2,TBR1,RELN
GO Process	GO:0003279	Cardiac septum development	4	111	0.97	0.0336	GATA6,GATA4,ANK2,GJA5
GO Process	GO:0099072	Regulation of postsynaptic membrane neurotransmitter receptor levels	3	49	2023-02-01	0.0348	STX1B,GRIP1,DLG4
GO Process	GO:0009893	Positive regulation of metabolic process	27	3893	0.25	0.0360	PHOX2B,UBE3A,SIX3,DOCK3,GATA6,FLCN,FGF13,OXTR,GATA4,BRAT1,AUTS2,ANK2,POU3F3,NKX6-2,PAX2,GRIN1,PDX1,TBR1,ADNP,GRIN2A,GRIP1,DYRK1A,DLG4,RELN,MECP2,GDNF,GRIN2B
GO Process	GO:0016188	Synaptic vesicle maturation	2	11	1.67	0.0361	STXBP1,DLG4
GO Process	GO:0031630	Regulation of synaptic vesicle fusion to presynaptic active zone membrane	2	11	1.67	0.0361	STXBP1,PRRT2
GO Process	GO:0097484	Dendrite extension	2	11	1.67	0.0361	AUTS2,SLC9A6
GO Process	GO:0006468	Protein phosphorylation	11	952	0.47	0.0365	FGF13,OXTR,TRIO,GRIN1,SPTAN1,DYRK1A,DLG4,RELN,SYNGAP1,GDNF,GRIN2B
GO Process	GO:0030004	Cellular monovalent inorganic cation homeostasis	4	115	0.95	0.0373	UBE3A,CCDC115,SLC9A6,ATP1A3
GO Process	GO:0071695	Anatomical structure maturation	5	200	0.81	0.0379	SIX3,CNTNAP2,PAX2,GRIN1,MECP2
GO Process	GO:0048562	Embryonic organ morphogenesis	6	301	0.71	0.0384	SIX3,GATA4,FOXG1,RYR2,PAX2,TBR1
GO Process	GO:0050885	Neuromuscular process controlling balance	3	52	1.17	0.0399	CNTNAP1,NKX6-2,DLG4
GO Process	GO:0009887	Animal organ morphogenesis	11	967	0.47	0.0408	SIX3,GATA6,FRAS1,GATA4,FOXG1,RYR2,PAX2,PDX1,TBR1,GDNF,GJA5
GO Process	GO:0035542	Regulation of snare complex assembly	2	12	1.63	0.0409	STXBP1,PRRT2
GO Process	GO:0048484	Enteric nervous system development	2	12	1.63	0.0409	PHOX2B,GDNF
GO Process	GO:1904862	Inhibitory synapse assembly	2	12	1.63	0.0409	GABRB3,FGF13
GO Process	GO:0044087	Regulation of cellular component biogenesis	11	971	0.46	0.0416	STX1B,OXTR,AUTS2,GRIN1,SPTAN1,STXBP1,ADNP,DYRK1A,MECP2,PRRT2,GFAP
GO Process	GO:0035270	Endocrine system development	4	120	0.93	0.0423	SIX3,GATA6,NKX6-2,PDX1
GO Process	GO:0051588	Regulation of neurotransmitter transport	4	120	0.93	0.0423	STX1B,STXBP1,GDNF,PRRT2
GO Process	GO:0006357	Regulation of transcription by rna polymerase ii	18	2172	0.33	0.0446	PHOX2B,UBE3A,SIX3,GATA6,FLCN,CC2D1A,GATA4,FOXG1,AUTS2,POU3F3,NKX6-2,PAX2,GRIN1,PDX1,TBR1,ADNP,MECP2,GDNF
GO Process	GO:0032270	Positive regulation of cellular protein metabolic process	15	1635	0.37	0.0446	UBE3A,DOCK3,FLCN,FGF13,GATA4,BRAT1,AUTS2,GRIN1,ADNP,GRIN2A,DYRK1A,DLG4,RELN,MECP2,GRIN2B
GO Process	GO:1903532	Positive regulation of secretion by cell	6	312	0.69	0.0446	STX1B,OXTR,STXBP1,PDX1,GDNF,PRRT2
GO Process	GO:0090183	Regulation of kidney development	3	55	1.15	0.0450	FLCN,PAX2,GDNF
GO Process	GO:0001967	Suckling behavior	2	13	2023-06-01	0.0456	OXTR,GRIN1
GO Process	GO:0002087	Regulation of respiratory gaseous exchange by nervous system process	2	13	2023-06-01	0.0456	PHOX2B,MECP2
GO Process	GO:0003188	Heart valve formation	2	13	2023-06-01	0.0456	GATA4,GJA5
GO Process	GO:0031629	Synaptic vesicle fusion to presynaptic active zone membrane	2	13	2023-06-01	0.0456	STX1B,PRRT2
GO Process	GO:0033605	Positive regulation of catecholamine secretion	2	13	2023-06-01	0.0456	OXTR,GDNF
GO Process	GO:0048729	Tissue morphogenesis	8	561	0.56	0.0473	SIX3,FRAS1,GATA4,RYR2,PAX2,PDX1,TBR1,GDNF
GO Process	GO:0002009	Morphogenesis of an epithelium	7	435	0.62	0.0477	FRAS1,GATA4,RYR2,PAX2,PDX1,TBR1,GDNF
GO Process	GO:0051056	Regulation of small gtpase mediated signal transduction	6	320	0.68	0.0489	FLCN,TRIO,AUTS2,IQSEC2,RELN,SYNGAP1
GO Molecular Function
GO Function	GO:0005216	Ion channel activity	22	425	2023-12-01	1.58e-15	HCN4,GLRB,CLCN2,SCN1A,ABCC8,ITPR1,GABRB3,KCND3,KCNJ11,SCN8A,KCNQ2,CACNA1A,RYR2,GRIN1,KCNT1,SCN2A,GRIN2A,SCN9A,UNC80,SCN1B,GRIN2B,GRIA3
GO Function	GO:0015267	Channel activity	23	471	2023-01-01	1.58e-15	HCN4,GLRB,CLCN2,SCN1A,ABCC8,ITPR1,GABRB3,KCND3,KCNJ11,SCN8A,KCNQ2,CACNA1A,RYR2,GRIN1,KCNT1,SCN2A,GRIN2A,SCN9A,UNC80,SCN1B,GRIN2B,GRIA3,GJA5
GO Function	GO:0022836	Gated channel activity	20	332	1.19	2.41e-15	HCN4,GLRB,CLCN2,SCN1A,ITPR1,GABRB3,KCND3,KCNJ11,SCN8A,KCNQ2,CACNA1A,RYR2,GRIN1,KCNT1,SCN2A,GRIN2A,SCN9A,SCN1B,GRIN2B,GRIA3
GO Function	GO:0046873	Metal ion transmembrane transporter activity	21	427	2023-01-01	1.23e-14	HCN4,SLC6A1,SCN1A,ABCC8,ITPR1,KCND3,KCNJ11,SCN8A,KCNQ2,CACNA1A,RYR2,SLC9A6,GRIN1,KCNT1,SCN2A,GRIN2A,SCN9A,SCN1B,SLC6A5,ATP1A3,GRIN2B
GO Function	GO:0015318	Inorganic molecular entity transmembrane transporter activity	26	813	0.92	1.85e-14	HCN4,GLRB,CLCN2,SLC6A1,SCN1A,ABCC8,ITPR1,GABRB3,KCND3,KCNJ11,SCN8A,KCNQ2,CACNA1A,RYR2,SLC9A6,GRIN1,KCNT1,SCN2A,GRIN2A,SCN9A,UNC80,SCN1B,SLC6A5,ATP1A3,GRIN2B,GRIA3
GO Function	GO:0005261	Cation channel activity	19	326	1.18	1.93e-14	HCN4,SCN1A,ABCC8,ITPR1,KCND3,KCNJ11,SCN8A,KCNQ2,CACNA1A,RYR2,GRIN1,KCNT1,SCN2A,GRIN2A,SCN9A,UNC80,SCN1B,GRIN2B,GRIA3
GO Function	GO:0022890	Inorganic cation transmembrane transporter activity	23	584	2023-01-01	1.93e-14	HCN4,SLC6A1,SCN1A,ABCC8,ITPR1,KCND3,KCNJ11,SCN8A,KCNQ2,CACNA1A,RYR2,SLC9A6,GRIN1,KCNT1,SCN2A,GRIN2A,SCN9A,UNC80,SCN1B,SLC6A5,ATP1A3,GRIN2B,GRIA3
GO Function	GO:0015075	Ion transmembrane transporter activity	26	865	0.89	5.27e-14	HCN4,GLRB,CLCN2,SLC6A1,SCN1A,ABCC8,ITPR1,GABRB3,KCND3,KCNJ11,SCN8A,KCNQ2,CACNA1A,RYR2,SLC9A6,GRIN1,KCNT1,SCN2A,GRIN2A,SCN9A,UNC80,SCN1B,SLC6A5,ATP1A3,GRIN2B,GRIA3
GO Function	GO:0022857	Transmembrane transporter activity	27	1050	0.82	4.12e-13	HCN4,GLRB,CLCN2,SLC6A1,SCN1A,ABCC8,ITPR1,GABRB3,KCND3,KCNJ11,SCN8A,KCNQ2,CACNA1A,RYR2,SLC9A6,GRIN1,KCNT1,SCN2A,GRIN2A,SCN9A,UNC80,SCN1B,SLC6A5,ATP1A3,GRIN2B,GRIA3,GJA5
GO Function	GO:0005244	Voltage-gated ion channel activity	15	194	2023-03-01	6.62e-13	HCN4,CLCN2,SCN1A,KCND3,KCNJ11,SCN8A,KCNQ2,CACNA1A,GRIN1,KCNT1,SCN2A,GRIN2A,SCN9A,SCN1B,GRIN2B
GO Function	GO:0015077	Monovalent inorganic cation transmembrane transporter activity	15	381	2023-01-01	5.68e-09	HCN4,SLC6A1,SCN1A,ABCC8,KCND3,KCNJ11,SCN8A,KCNQ2,SLC9A6,KCNT1,SCN2A,SCN9A,SCN1B,SLC6A5,ATP1A3
GO Function	GO:0015276	Ligand-gated ion channel activity	10	133	1.29	3.90e-08	HCN4,GLRB,ITPR1,GABRB3,KCNJ11,RYR2,GRIN1,GRIN2A,GRIN2B,GRIA3
GO Function	GO:0015081	Sodium ion transmembrane transporter activity	10	150	1.23	1.05e-07	HCN4,SLC6A1,SCN1A,SCN8A,SLC9A6,SCN2A,SCN9A,SCN1B,SLC6A5,ATP1A3
GO Function	GO:0005248	Voltage-gated sodium channel activity	6	23	1.83	2.07e-07	HCN4,SCN1A,SCN8A,SCN2A,SCN9A,SCN1B
GO Function	GO:0022843	Voltage-gated cation channel activity	9	137	1.23	8.16e-07	HCN4,KCND3,KCNJ11,KCNQ2,CACNA1A,GRIN1,KCNT1,GRIN2A,GRIN2B
GO Function	GO:0099094	Ligand-gated cation channel activity	8	101	1.31	1.47e-06	HCN4,ITPR1,KCNJ11,RYR2,GRIN1,GRIN2A,GRIN2B,GRIA3
GO Function	GO:0099604	Ligand-gated calcium channel activity	5	23	1.75	9.79e-06	ITPR1,RYR2,GRIN1,GRIN2A,GRIN2B
GO Function	GO:1904315	Transmitter-gated ion channel activity involved in regulation of postsynaptic membrane potential	6	53	1.46	1.42e-05	GLRB,GABRB3,GRIN1,GRIN2A,GRIN2B,GRIA3
GO Function	GO:0015079	Potassium ion transmembrane transporter activity	8	159	2023-11-01	3.08e-05	HCN4,ABCC8,KCND3,KCNJ11,KCNQ2,SLC9A6,KCNT1,ATP1A3
GO Function	GO:0001540	Amyloid-beta binding	6	76	1.31	7.95e-05	CACNA1A,GRIN1,GRIN2A,ATP1A3,GRIN2B,GRIA3
GO Function	GO:0044325	Ion channel binding	7	134	1.13	0.00012	ABCC8,KCND3,FGF13,KCNJ11,ANK2,RYR2,SCN1B
GO Function	GO:0004970	Ionotropic glutamate receptor activity	4	19	1.73	0.00017	GRIN1,GRIN2A,GRIN2B,GRIA3
GO Function	GO:0022849	Glutamate-gated calcium ion channel activity	3	5	2.19	0.00029	GRIN1,GRIN2A,GRIN2B
GO Function	GO:0005515	Protein binding	47	7026	0.24	0.00037	STX1B,CCDC115,SIX3,HCN4,CNTNAP1,DOCK3,GATA6,FLCN,SLC6A1,ABCC8,HOMER2,GABRB3,RBFOX1,CC2D1A,KCND3,TUBB3,FGF13,GATA4,KPTN,TRIO,KCNJ11,ANK2,KCNQ2,CACNA1A,CNTNAP2,POU3F3,RYR2,PAX2,GRIN1,SPTAN1,STXBP1,PDX1,TBR1,ADNP,IQSEC2,GRIP1,DYRK1A,DLG4,RELN,MECP2,SCN1B,SYNGAP1,GDNF,ATP1A3,PRRT2,GFAP,GJA5
GO Function	GO:0004972	NMDA glutamate receptor activity	3	7	2023-04-02	0.00056	GRIN1,GRIN2A,GRIN2B
GO Function	GO:0005262	Calcium channel activity	6	114	1.13	0.00059	ITPR1,CACNA1A,RYR2,GRIN1,GRIN2A,GRIN2B
GO Function	GO:0005488	Binding	66	12516	0.13	0.00062	STX1B,PHOX2B,UBE3A,CCDC115,SIX3,HCN4,GLRB,CNTNAP1,DOCK3,GATA6,POGZ,FLCN,SLC6A1,ABCC8,HOMER2,ITPR1,GABRB3,RBFOX1,CC2D1A,KCND3,TUBB3,FGF13,OXTR,FRAS1,GATA4,KPTN,FOXG1,TRIO,AUTS2,KCNJ11,SCN8A,ANK2,KCNQ2,CACNA1A,CNTNAP2,POU3F3,RYR2,NKX6-2,PAX2,GRIN1,SPTAN1,PCDH19,STXBP1,PDX1,TBR1,ADNP,IQSEC2,GRIN2A,GRIP1,DYRK1A,DLG4,DEPDC5,MBD5,SCN9A,RELN,MECP2,SCN1B,SYNGAP1,GDNF,SLC6A5,ATP1A3,PRRT2,GFAP,GRIN2B,GRIA3…
GO Function	GO:0005267	Potassium channel activity	6	123	2023-01-01	0.00085	HCN4,ABCC8,KCND3,KCNJ11,KCNQ2,KCNT1
GO Function	GO:0033218	Amide binding	9	369	0.8	0.0011	OXTR,CACNA1A,RYR2,GRIN1,ADNP,GRIN2A,ATP1A3,GRIN2B,GRIA3
GO Function	GO:0042277	Peptide binding	8	299	0.84	0.0018	OXTR,CACNA1A,GRIN1,ADNP,GRIN2A,ATP1A3,GRIN2B,GRIA3
GO Function	GO:0005249	Voltage-gated potassium channel activity	5	86	1.18	0.0020	HCN4,KCND3,KCNJ11,KCNQ2,KCNT1
GO Function	GO:0016594	Glycine binding	3	14	1.74	0.0026	GLRB,GRIN1,GRIN2B
GO Function	GO:0019904	Protein domain specific binding	11	716	0.6	0.0071	STX1B,CNTNAP1,DOCK3,HOMER2,POU3F3,STXBP1,DLG4,MECP2,SYNGAP1,PRRT2,GJA5
GO Function	GO:0098772	Molecular function regulator	27	3422	0.31	0.0089	PHOX2B,UBE3A,SIX3,DOCK3,GATA6,FLCN,TBC1D24,ITPR1,CC2D1A,FGF13,GATA4,FOXG1,TRIO,POU3F3,NKX6-2,PAX2,PDX1,TBR1,ADNP,IQSEC2,GRIP1,DYRK1A,DEPDC5,MECP2,SCN1B,SYNGAP1,GDNF
GO Function	GO:0000981	DNA-binding transcription factor activity, RNA polymerase II-specific	13	1022	0.52	0.0100	PHOX2B,SIX3,GATA6,CC2D1A,GATA4,FOXG1,POU3F3,NKX6-2,PAX2,PDX1,TBR1,ADNP,MECP2
GO Function	GO:0005217	Intracellular ligand-gated ion channel activity	3	29	1.43	0.0162	HCN4,ITPR1,RYR2
GO Function	GO:0022853	Active ion transmembrane transporter activity	6	237	0.81	0.0223	SLC6A1,ABCC8,KCNJ11,SLC9A6,SLC6A5,ATP1A3
GO Function	GO:0140110	Transcription regulator activity	16	1657	0.4	0.0347	PHOX2B,UBE3A,SIX3,GATA6,CC2D1A,GATA4,FOXG1,POU3F3,NKX6-2,PAX2,PDX1,TBR1,ADNP,GRIP1,DYRK1A,MECP2
GO Function	GO:0015108	Chloride transmembrane transporter activity	4	101	2023-01-01	0.0441	GLRB,CLCN2,SLC6A1,GABRB3
GO Function	GO:0005200	Structural constituent of cytoskeleton	4	104	1.0	0.0481	TUBB3,ANK2,SPTAN1,GFAP
GO Cellular Component
GO Component	GO:1902495	Transmembrane transporter complex	23	313	1.28	1.38e-19	HCN4,GLRB,CLCN2,SCN1A,ABCC8,GABRB3,KCND3,KCNJ11,SCN8A,KCNQ2,CACNA1A,CNTNAP2,RYR2,GRIN1,SCN2A,GRIN2A,DLG4,SCN9A,UNC80,SCN1B,ATP1A3,GRIN2B,GRIA3
GO Component	GO:0034702	Ion channel complex	22	289	1.29	2.22e-19	HCN4,GLRB,CLCN2,SCN1A,ABCC8,GABRB3,KCND3,KCNJ11,SCN8A,KCNQ2,CACNA1A,CNTNAP2,RYR2,GRIN1,SCN2A,GRIN2A,DLG4,SCN9A,UNC80,SCN1B,GRIN2B,GRIA3
GO Component	GO:0043005	Neuron projection	36	1366	0.83	5.59e-19	STX1B,GLRB,CNTNAP1,SLC6A1,TBC1D24,SCN1A,HOMER2,GABRB3,KCND3,TUBB3,FGF13,KPTN,AUTS2,KCNJ11,SCN8A,ANK2,KCNQ2,CNTNAP2,SLC9A6,GRIN1,STXBP1,SCN2A,ADNP,GRIN2A,GRIP1,DYRK1A,DLG4,SCN9A,UNC80,RELN,SCN1B,SYNGAP1,ATP1A3,PRRT2,GRIN2B,GRIA3
GO Component	GO:0034703	Cation channel complex	19	214	1.36	8.74e-18	HCN4,SCN1A,ABCC8,KCND3,KCNJ11,SCN8A,KCNQ2,CACNA1A,CNTNAP2,RYR2,GRIN1,SCN2A,GRIN2A,DLG4,SCN9A,UNC80,SCN1B,GRIN2B,GRIA3
GO Component	GO:0042995	Cell projection	41	2287	0.66	1.74e-16	STX1B,GLRB,CNTNAP1,FLCN,SLC6A1,TBC1D24,SCN1A,HOMER2,GABRB3,KCND3,TUBB3,FGF13,OXTR,KPTN,TRIO,AUTS2,KCNJ11,SCN8A,ANK2,KCNQ2,CACNA1A,CNTNAP2,SLC9A6,GRIN1,STXBP1,SCN2A,ADNP,GRIN2A,GRIP1,DYRK1A,DLG4,SCN9A,UNC80,RELN,SCN1B,SYNGAP1,ATP1A3,PRRT2,GRIN2B,GRIA3,GJA5
GO Component	GO:0030424	Axon	24	646	0.98	7.08e-15	STX1B,CNTNAP1,SLC6A1,TBC1D24,SCN1A,TUBB3,FGF13,AUTS2,KCNJ11,SCN8A,KCNQ2,CNTNAP2,SLC9A6,GRIN1,STXBP1,SCN2A,ADNP,DYRK1A,DLG4,SCN9A,UNC80,SCN1B,ATP1A3,PRRT2
GO Component	GO:0120025	Plasma membrane bounded cell projection	38	2193	0.65	1.75e-14	STX1B,GLRB,CNTNAP1,FLCN,SLC6A1,TBC1D24,SCN1A,HOMER2,GABRB3,KCND3,TUBB3,FGF13,OXTR,KPTN,AUTS2,KCNJ11,SCN8A,ANK2,KCNQ2,CNTNAP2,SLC9A6,GRIN1,STXBP1,SCN2A,ADNP,GRIN2A,GRIP1,DYRK1A,DLG4,SCN9A,UNC80,RELN,SCN1B,SYNGAP1,ATP1A3,PRRT2,GRIN2B,GRIA3
GO Component	GO:0030054	Cell junction	35	2075	0.64	1.15e-12	STX1B,GLRB,CNTNAP1,SLC6A1,TBC1D24,SCN1A,HOMER2,ITPR1,GABRB3,KCND3,FGF13,KPTN,KCNJ11,SCN8A,ANK2,KCNQ2,CACNA1A,CNTNAP2,SLC9A6,GRIN1,STXBP1,SCN2A,IQSEC2,GRIN2A,GRIP1,DLG4,MECP2,SCN1B,SYNGAP1,SLC6A5,ATP1A3,PRRT2,GRIN2B,GRIA3,GJA5
GO Component	GO:0098797	Plasma membrane protein complex	20	547	0.97	4.77e-12	HCN4,GLRB,SCN1A,ABCC8,KCND3,KCNJ11,SCN8A,KCNQ2,CACNA1A,CNTNAP2,GRIN1,SCN2A,GRIN2A,DLG4,SCN9A,SCN1B,ATP1A3,GRIN2B,GRIA3,GJA5
GO Component	GO:0045202	Synapse	28	1351	0.73	1.10e-11	STX1B,GLRB,CNTNAP1,SLC6A1,TBC1D24,HOMER2,ITPR1,GABRB3,KCND3,KPTN,ANK2,KCNQ2,CACNA1A,SLC9A6,GRIN1,STXBP1,SCN2A,IQSEC2,GRIN2A,GRIP1,DLG4,MECP2,SYNGAP1,SLC6A5,ATP1A3,PRRT2,GRIN2B,GRIA3
GO Component	GO:0098796	Membrane protein complex	26	1141	0.77	1.24e-11	STX1B,CCDC115,HCN4,GLRB,CLCN2,SCN1A,ABCC8,GABRB3,KCND3,KCNJ11,SCN8A,KCNQ2,CACNA1A,CNTNAP2,RYR2,GRIN1,SCN2A,GRIN2A,DLG4,SCN9A,UNC80,SCN1B,ATP1A3,GRIN2B,GRIA3,GJA5
GO Component	GO:0036477	Somatodendritic compartment	23	852	0.84	1.49e-11	GLRB,SLC6A1,SCN1A,HOMER2,KCND3,TUBB3,FGF13,KCNJ11,CACNA1A,CNTNAP2,SLC9A6,GRIN1,ADNP,GRIN2A,GRIP1,DYRK1A,DLG4,RELN,SCN1B,SYNGAP1,ATP1A3,PRRT2,GRIA3
GO Component	GO:0097060	Synaptic membrane	17	387	2023-05-01	2.31e-11	STX1B,GLRB,CNTNAP1,SLC6A1,GABRB3,KCND3,ANK2,GRIN1,STXBP1,SCN2A,GRIN2A,GRIP1,DLG4,SLC6A5,PRRT2,GRIN2B,GRIA3
GO Component	GO:0044304	Main axon	9	70	1.52	2.24e-09	CNTNAP1,SCN1A,KCNJ11,SCN8A,KCNQ2,CNTNAP2,SCN2A,DLG4,SCN1B
GO Component	GO:0005887	Integral component of plasma membrane	27	1623	0.63	3.85e-09	HCN4,GLRB,CNTNAP1,CLCN2,SLC6A1,SCN1A,ABCC8,GABRB3,KCND3,OXTR,KCNJ11,SCN8A,KCNQ2,CNTNAP2,GRIN1,PCDH19,SCN2A,GRIN2A,DLG4,SCN9A,SCN1B,SLC6A5,ATP1A3,PRRT2,GRIN2B,GRIA3,GJA5
GO Component	GO:0098794	Postsynapse	18	643	0.86	4.93e-09	GLRB,SLC6A1,HOMER2,ITPR1,GABRB3,KCND3,KPTN,ANK2,GRIN1,STXBP1,GRIN2A,GRIP1,DLG4,MECP2,SYNGAP1,PRRT2,GRIN2B,GRIA3
GO Component	GO:0030425	Dendrite	17	612	0.85	1.86e-08	GLRB,HOMER2,KCND3,TUBB3,FGF13,CNTNAP2,SLC9A6,GRIN1,ADNP,GRIN2A,GRIP1,DYRK1A,DLG4,RELN,SYNGAP1,PRRT2,GRIA3
GO Component	GO:0045211	Postsynaptic membrane	12	281	2023-04-01	1.04e-07	GLRB,SLC6A1,GABRB3,KCND3,ANK2,GRIN1,GRIN2A,GRIP1,DLG4,PRRT2,GRIN2B,GRIA3
GO Component	GO:0014704	Intercalated disc	7	51	1.55	1.94e-07	SCN1A,FGF13,KCNJ11,ANK2,SCN2A,SCN1B,GJA5
GO Component	GO:0071944	Cell periphery	46	5432	0.34	1.98e-07	STX1B,HCN4,GLRB,CNTNAP1,CLCN2,FLCN,SLC6A1,TBC1D24,SCN1A,ABCC8,HOMER2,ITPR1,GABRB3,CC2D1A,KCND3,FGF13,OXTR,FRAS1,KCNJ11,SCN8A,ANK2,KCNQ2,CACNA1A,CNTNAP2,RYR2,SLC9A6,GRIN1,KCNT1,SPTAN1,PCDH19,STXBP1,SCN2A,GRIN2A,GRIP1,DLG4,SCN9A,UNC80,RELN,SCN1B,SYNGAP1,SLC6A5,ATP1A3,PRRT2,GRIN2B,GRIA3,GJA5
GO Component	GO:0005886	Plasma membrane	45	5314	0.34	3.55e-07	STX1B,HCN4,GLRB,CNTNAP1,CLCN2,FLCN,SLC6A1,TBC1D24,SCN1A,ABCC8,HOMER2,ITPR1,GABRB3,CC2D1A,KCND3,FGF13,OXTR,FRAS1,KCNJ11,SCN8A,ANK2,KCNQ2,CACNA1A,CNTNAP2,RYR2,SLC9A6,GRIN1,KCNT1,PCDH19,STXBP1,SCN2A,GRIN2A,GRIP1,DLG4,SCN9A,UNC80,RELN,SCN1B,SYNGAP1,SLC6A5,ATP1A3,PRRT2,GRIN2B,GRIA3,GJA5
GO Component	GO:0098590	Plasma membrane region	21	1219	0.65	3.76e-07	STX1B,GLRB,CNTNAP1,SLC6A1,GABRB3,KCND3,OXTR,KCNJ11,ANK2,CNTNAP2,GRIN1,STXBP1,SCN2A,GRIN2A,GRIP1,DLG4,SLC6A5,ATP1A3,PRRT2,GRIN2B,GRIA3
GO Component	GO:0033268	Node of ranvier	5	15	1.93	7.35e-07	SCN1A,SCN8A,KCNQ2,SCN2A,SCN1B
GO Component	GO:0001518	Voltage-gated sodium channel complex	5	17	1.88	1.19e-06	SCN1A,SCN8A,SCN2A,SCN9A,SCN1B
GO Component	GO:0099572	Postsynaptic specialization	11	369	0.89	1.29e-05	HOMER2,ITPR1,KCND3,GRIN1,GRIN2A,GRIP1,DLG4,SYNGAP1,PRRT2,GRIN2B,GRIA3
GO Component	GO:0042734	Presynaptic membrane	8	158	2023-12-01	1.39e-05	STX1B,CNTNAP1,SLC6A1,STXBP1,SCN2A,GRIN2A,SLC6A5,PRRT2
GO Component	GO:0098984	Neuron to neuron synapse	11	374	0.88	1.39e-05	HOMER2,ITPR1,GRIN1,GRIN2A,GRIP1,DLG4,SYNGAP1,ATP1A3,PRRT2,GRIN2B,GRIA3
GO Component	GO:0099634	Postsynaptic specialization membrane	7	126	1.16	4.25e-05	KCND3,GRIN1,GRIN2A,DLG4,PRRT2,GRIN2B,GRIA3
GO Component	GO:0098793	Presynapse	12	526	0.77	4.96e-05	STX1B,CNTNAP1,SLC6A1,TBC1D24,SLC9A6,GRIN1,STXBP1,SCN2A,GRIN2A,DLG4,SLC6A5,PRRT2
GO Component	GO:0014069	Postsynaptic density	10	344	0.87	5.14e-05	HOMER2,ITPR1,GRIN1,GRIN2A,GRIP1,DLG4,SYNGAP1,PRRT2,GRIN2B,GRIA3
GO Component	GO:0008328	Ionotropic glutamate receptor complex	5	43	1.48	5.24e-05	GRIN1,GRIN2A,DLG4,GRIN2B,GRIA3
GO Component	GO:0042383	Sarcolemma	7	132	1.14	5.24e-05	SCN1A,KCND3,KCNJ11,ANK2,RYR2,SCN2A,SCN1B
GO Component	GO:0034705	Potassium channel complex	6	91	1.23	8.72e-05	HCN4,ABCC8,KCND3,KCNJ11,KCNQ2,CNTNAP2
GO Component	GO:0030315	T-tubule	5	54	1.38	0.00013	SCN1A,KCNJ11,ANK2,SCN2A,SCN1B
GO Component	GO:0098839	Postsynaptic density membrane	6	100	1.19	0.00014	GRIN1,GRIN2A,DLG4,PRRT2,GRIN2B,GRIA3
GO Component	GO:0099699	Integral component of synaptic membrane	7	157	2023-06-01	0.00014	SLC6A1,KCND3,GRIN1,SCN2A,GRIN2A,SLC6A5,PRRT2
GO Component	GO:0043025	Neuronal cell body	11	518	0.74	0.00022	SLC6A1,SCN1A,HOMER2,KCND3,KCNJ11,CACNA1A,CNTNAP2,ADNP,GRIP1,SCN1B,ATP1A3
GO Component	GO:0032991	Protein-containing complex	38	5073	0.29	0.00024	STX1B,UBE3A,CCDC115,SIX3,HCN4,GLRB,CLCN2,GATA6,SCN1A,ABCC8,COG7,ITPR1,GABRB3,KCND3,GATA4,KPTN,KCNJ11,SCN8A,KCNQ2,CACNA1A,CNTNAP2,RYR2,PAX2,GRIN1,SPTAN1,STXBP1,SCN2A,GRIN2A,DYRK1A,DLG4,DEPDC5,SCN9A,UNC80,SCN1B,ATP1A3,GRIN2B,GRIA3,GJA5
GO Component	GO:0098978	Glutamatergic synapse	9	361	0.81	0.00046	HOMER2,GRIN1,STXBP1,SCN2A,GRIN2A,GRIP1,DLG4,SYNGAP1,PRRT2
GO Component	GO:0017146	NMDA selective glutamate receptor complex	3	11	1.85	0.00068	GRIN1,GRIN2A,GRIN2B
GO Component	GO:0016020	Membrane	53	9072	0.18	0.0011	STX1B,IER3IP1,CCDC115,HCN4,GLRB,CNTNAP1,CLCN2,GATA6,FLCN,SLC6A1,TBC1D24,SCN1A,ABCC8,COG7,HOMER2,ITPR1,GABRB3,CC2D1A,KCND3,FGF13,OXTR,FRAS1,KPTN,BRAT1,KCNJ11,SCN8A,ANK2,KCNQ2,CACNA1A,CNTNAP2,RYR2,SLC9A6,GRIN1,KCNT1,SPTAN1,PCDH19,STXBP1,SCN2A,GRIN2A,GRIP1,DLG4,DEPDC5,SCN9A,UNC80,RELN,SCN1B,SYNGAP1,SLC6A5,ATP1A3,PRRT2,GRIN2B,GRIA3,GJA5
GO Component	GO:0043194	Axon initial segment	3	18	1.63	0.0023	SCN1A,SCN8A,KCNQ2
GO Component	GO:0044309	Neuron spine	6	175	0.95	0.0024	SLC9A6,GRIN1,GRIN2A,DLG4,PRRT2,GRIA3
GO Component	GO:0016021	Integral component of membrane	36	5181	0.25	0.0025	STX1B,IER3IP1,HCN4,GLRB,CNTNAP1,CLCN2,SLC6A1,SCN1A,ABCC8,ITPR1,GABRB3,KCND3,OXTR,FRAS1,KCNJ11,SCN8A,KCNQ2,CACNA1A,CNTNAP2,RYR2,SLC9A6,GRIN1,KCNT1,PCDH19,SCN2A,GRIN2A,DLG4,SCN9A,UNC80,SCN1B,SLC6A5,ATP1A3,PRRT2,GRIN2B,GRIA3,GJA5
GO Component	GO:0005911	Cell-cell junction	9	490	0.67	0.0041	CNTNAP1,SCN1A,FGF13,KCNJ11,ANK2,CNTNAP2,SCN2A,SCN1B,GJA5
GO Component	GO:0008282	Inward rectifying potassium channel	2	3	2.23	0.0045	ABCC8,KCNJ11
GO Component	GO:0150034	Distal axon	7	310	0.76	0.0067	TBC1D24,TUBB3,FGF13,AUTS2,SLC9A6,GRIN1,PRRT2
GO Component	GO:0098982	GABA-ergic synapse	4	74	1.14	0.0070	GLRB,SLC6A1,GABRB3,KCND3
GO Component	GO:0099056	Integral component of presynaptic membrane	4	77	1.13	0.0079	SLC6A1,SCN2A,SLC6A5,PRRT2
GO Component	GO:0044306	Neuron projection terminus	5	147	0.94	0.0087	TBC1D24,SLC9A6,GRIN1,DLG4,PRRT2
GO Component	GO:0048787	Presynaptic active zone membrane	3	32	1.38	0.0093	STX1B,CNTNAP1,STXBP1
GO Component	GO:0008076	Voltage-gated potassium channel complex	4	82	2023-01-01	0.0094	HCN4,KCND3,KCNQ2,CNTNAP2
GO Component	GO:0043232	Intracellular non-membrane-bounded organelle	33	4880	0.24	0.0094	STX1B,PHOX2B,SIX3,GATA6,POGZ,FLCN,SCN1A,COG7,ITPR1,RBFOX1,CC2D1A,TUBB3,FGF13,GATA4,KPTN,FOXG1,AUTS2,SCN8A,ANK2,POU3F3,RYR2,NKX6-2,PAX2,SPTAN1,STXBP1,PDX1,ADNP,DYRK1A,DLG4,MBD5,MECP2,GFAP,GRIN2B
GO Component	GO:0098690	Glycinergic synapse	2	7	1.87	0.0135	GLRB,SLC6A5
GO Component	GO:0031410	Cytoplasmic vesicle	20	2386	0.33	0.0159	IER3IP1,CCDC115,TBC1D24,ITPR1,GABRB3,KCNJ11,SCN8A,ANK2,CNTNAP2,RYR2,SLC9A6,GRIN1,SPTAN1,STXBP1,GRIN2A,GRIP1,DLG4,PRRT2,GRIN2B,GRIA3
GO Component	GO:0033010	Paranodal junction	2	8	1.81	0.0159	CNTNAP1,CNTNAP2
GO Component	GO:0043197	Dendritic spine	5	173	0.87	0.0159	GRIN1,GRIN2A,DLG4,PRRT2,GRIA3
GO Component	GO:0110165	Cellular anatomical entity	76	17788	0.04	0.0172	STX1B,PHOX2B,UBE3A,IER3IP1,CCDC115,SIX3,HCN4,GLRB,CNTNAP1,CLCN2,DOCK3,GATA6,POGZ,FLCN,SLC6A1,TBC1D24,SCN1A,ABCC8,COG7,HOMER2,ITPR1,GABRB3,RBFOX1,CC2D1A,KCND3,TUBB3,FGF13,OXTR,FRAS1,GATA4,KPTN,FOXG1,TRIO,BRAT1,AUTS2,KCNJ11,SCN8A,ANK2,KCNQ2,CACNA1A,CNTNAP2,POU3F3,RYR2,NKX6-2,PAX2,SLC9A6,GRIN1,KCNT1,SPTAN1,PCDH19,STXBP1,SCN2A,PDX1,TBR1,ADNP,IQSEC2,GRIN2A,GRIP1,DYRK1A,DLG4,DEPDC5,MBD5,SCN9A,UNC80,REL…
GO Component	GO:0044224	Juxtaparanode region of axon	2	10	1.71	0.0221	CNTNAP2,DLG4
GO Component	GO:0034707	Chloride channel complex	3	49	2023-02-01	0.0246	GLRB,CLCN2,GABRB3
GO Component	GO:0060076	Excitatory synapse	3	51	1.18	0.0271	GRIN1,DLG4,GRIA3
GO Component	GO:0033270	Paranode region of axon	2	12	1.63	0.0292	CNTNAP1,SCN2A
GO Component	GO:0099055	Integral component of postsynaptic membrane	4	119	0.94	0.0293	SLC6A1,KCND3,GRIN1,GRIN2A
GO Component	GO:0098858	Actin-based cell projection	5	214	0.78	0.0344	HOMER2,TUBB3,FGF13,OXTR,KPTN
GO Component	GO:0043679	Axon terminus	4	128	0.91	0.0365	TBC1D24,SLC9A6,GRIN1,PRRT2
GO Component	GO:0030018	Z disc	4	131	0.9	0.0392	SCN1A,SCN8A,ANK2,RYR2
GO Component	GO:0030673	Axolemma	2	16	1.51	0.0450	KCNJ11,CNTNAP2
GO Component	GO:0000790	Nuclear chromatin	11	1048	0.43	0.0498	PHOX2B,SIX3,GATA6,POGZ,GATA4,FOXG1,POU3F3,NKX6-2,PAX2,PDX1,ADNP
Reactome
Reactome	HSA-112316	Neuronal System	18	406	2023-06-01	6.25e-11	HCN4,GLRB,SLC6A1,ABCC8,HOMER2,GABRB3,KCND3,TUBB3,KCNJ11,KCNQ2,CACNA1A,GRIN1,STXBP1,GRIN2A,GRIP1,DLG4,GRIN2B,GRIA3
Reactome	HSA-5576891	Cardiac conduction	12	126	1.39	2.04e-10	SCN1A,ITPR1,KCND3,FGF13,GATA4,KCNJ11,SCN8A,RYR2,SCN2A,SCN9A,SCN1B,ATP1A3
Reactome	HSA-445095	Interaction between L1 and Ankyrins	8	31	1.82	1.39e-09	SCN1A,SCN8A,ANK2,KCNQ2,SPTAN1,SCN2A,SCN9A,SCN1B
Reactome	HSA-373760	L1CAM interactions	11	119	1.38	1.50e-09	CNTNAP1,SCN1A,TUBB3,SCN8A,ANK2,KCNQ2,SPTAN1,SCN2A,DLG4,SCN9A,SCN1B
Reactome	HSA-422475	Axon guidance	16	547	0.88	1.34e-07	CNTNAP1,SCN1A,TUBB3,TRIO,SCN8A,ANK2,KCNQ2,GRIN1,SPTAN1,SCN2A,DLG4,SCN9A,RELN,SCN1B,GDNF,GRIN2B
Reactome	HSA-112315	Transmission across Chemical Synapses	12	267	2023-06-01	2.16e-07	GLRB,SLC6A1,GABRB3,TUBB3,CACNA1A,GRIN1,STXBP1,GRIN2A,GRIP1,DLG4,GRIN2B,GRIA3
Reactome	HSA-5576892	Phase 0 - rapid depolarisation	6	32	1.68	1.66e-06	SCN1A,FGF13,SCN8A,SCN2A,SCN9A,SCN1B
Reactome	HSA-1266738	Developmental Biology	19	1087	0.65	6.06e-06	STX1B,CNTNAP1,SCN1A,TUBB3,GATA4,TRIO,SCN8A,ANK2,KCNQ2,GRIN1,SPTAN1,SCN2A,PDX1,DLG4,SCN9A,RELN,SCN1B,GDNF,GRIN2B
Reactome	HSA-438066	Unblocking of NMDA receptors, glutamate binding and activation	5	21	1.79	9.25e-06	GRIN1,GRIN2A,DLG4,GRIN2B,GRIA3
Reactome	HSA-8849932	Synaptic adhesion-like molecules	5	21	1.79	9.25e-06	GRIN1,GRIN2A,DLG4,GRIN2B,GRIA3
Reactome	HSA-6794362	Protein-protein interactions at synapses	7	85	1.33	1.10e-05	HOMER2,GRIN1,STXBP1,GRIN2A,DLG4,GRIN2B,GRIA3
Reactome	HSA-112314	Neurotransmitter receptors and postsynaptic signal transmission	9	203	2023-06-01	1.98e-05	GLRB,GABRB3,TUBB3,GRIN1,GRIN2A,GRIP1,DLG4,GRIN2B,GRIA3
Reactome	HSA-6794361	Neurexins and neuroligins	6	55	1.45	1.98e-05	HOMER2,GRIN1,STXBP1,GRIN2A,DLG4,GRIN2B
Reactome	HSA-9609736	Assembly and cell surface presentation of NMDA receptors	5	42	1.49	0.00014	TUBB3,GRIN1,GRIN2A,DLG4,GRIN2B
Reactome	HSA-442755	Activation of NMDA receptors and postsynaptic events	6	92	1.23	0.00028	TUBB3,GRIN1,GRIN2A,DLG4,GRIN2B,GRIA3
Reactome	HSA-9617324	Negative regulation of NMDA receptor-mediated neuronal transmission	4	21	1.69	0.00030	GRIN1,GRIN2A,DLG4,GRIN2B
Reactome	HSA-9620244	Long-term potentiation	4	23	1.65	0.00039	GRIN1,GRIN2A,DLG4,GRIN2B
Reactome	HSA-8986944	Transcriptional Regulation by MECP2	5	59	1.34	0.00053	RBFOX1,FOXG1,GRIN2A,MECP2,GRIN2B
Reactome	HSA-422356	Regulation of insulin secretion	5	78	1.22	0.0018	ABCC8,ITPR1,KCNJ11,CACNA1A,STXBP1
Reactome	HSA-438064	Post NMDA receptor activation events	5	79	1.21	0.0018	TUBB3,GRIN1,GRIN2A,DLG4,GRIN2B
Reactome	HSA-1296071	Potassium Channels	5	103	2023-01-01	0.0057	HCN4,ABCC8,KCND3,KCNJ11,KCNQ2
Reactome	HSA-9022699	MECP2 regulates neuronal receptors and channels	3	17	1.66	0.0057	GRIN2A,MECP2,GRIN2B
Reactome	HSA-5578775	Ion homeostasis	4	54	1.28	0.0065	ITPR1,KCNJ11,RYR2,ATP1A3
Reactome	HSA-5683177	Defective ABCC8 can cause hypo- and hyper-glycemias	2	2	2.41	0.0071	ABCC8,KCNJ11
Reactome	HSA-442982	Ras activation upon Ca2+ influx through NMDA receptor	3	20	1.59	0.0072	GRIN1,DLG4,GRIN2B
Reactome	HSA-1296025	ATP sensitive Potassium channels	2	4	2023-11-02	0.0164	ABCC8,KCNJ11
Reactome	HSA-399719	Trafficking of AMPA receptors	3	31	2023-04-01	0.0214	GRIP1,DLG4,GRIA3
Reactome	HSA-9022707	MECP2 regulates transcription factors	2	5	2023-01-02	0.0214	RBFOX1,MECP2
Reactome	HSA-9032500	Activated NTRK2 signals through FYN	2	7	1.87	0.0334	DOCK3,GRIN2B
Reactome	HSA-6807878	COPI-mediated anterograde transport	4	100	2023-01-01	0.0441	COG7,TUBB3,ANK2,SPTAN1
Reactome	HSA-5673001	RAF/MAP kinase cascade	6	274	0.75	0.0455	GRIN1,SPTAN1,DLG4,SYNGAP1,GDNF,GRIN2B

## Sheet: Enrichment subnetwork2 seizure 
#category	term ID	term description	observed gene count	background gene count	strength	false discovery rate	matching proteins in your network (labels)
GO Biological Process
GO Process	GO:0006996	Organelle organization	55	3450	0.63	1.12e-22	NUP107,DOCK7,TUBG1,BRIP1,CREBBP,SMARCB1,EP300,CENPE,NBN,TINF2,FANCM,ATM,KAT6B,BUB1B,CDT1,TUBA1A,BPTF,TERT,ATRIP,SMC1A,ZNF335,TUBB,MCPH1,ATR,CDK5RAP2,ARID1B,ATG7,SMARCAL1,NF1,DNA2,PCNT,CENPF,SYNE1,KDM5B,ASPM,DKC1,STIL,PTEN,ATRX,ASXL1,FANCG,RAD50,CEP152,CENPJ,BRPF1,FANCA,ERCC2,CHD2,NDE1,PAFAH1B1,INPP5K,HYLS1,EHMT1,GTF2H5,KIZ
GO Process	GO:0051276	Chromosome organization	34	1066	0.93	9.75e-20	NUP107,TUBG1,BRIP1,CREBBP,SMARCB1,EP300,CENPE,NBN,TINF2,FANCM,ATM,KAT6B,BUB1B,CDT1,BPTF,TERT,ATRIP,SMC1A,ZNF335,ATR,ARID1B,SMARCAL1,DNA2,CENPF,KDM5B,DKC1,ATRX,ASXL1,RAD50,BRPF1,ERCC2,CHD2,EHMT1,GTF2H5
GO Process	GO:0006259	DNA metabolic process	28	750	1.0	3.31e-17	BRIP1,PALB2,HERC2,SMARCB1,EP300,NBN,TINF2,FANCM,ATM,TERT,FANCI,ATRIP,SMC1A,PNKP,ATR,SMARCAL1,DNA2,CENPF,DKC1,ATRX,FANCG,RAD50,FANCA,ERCC2,RBBP8,FANCL,EHMT1,GTF2H5
GO Process	GO:0022402	Cell cycle process	29	976	0.9	1.73e-15	TUBG1,BRIP1,EP300,CENPE,NBN,FANCM,ATM,BUB1B,CDT1,TUBA1A,SMC1A,TUBB,MCPH1,CDK5RAP2,DNA2,PCNT,CENPF,ASPM,STIL,ATRX,RAD50,CEP152,CENPJ,FANCA,NDE1,PAFAH1B1,RBBP8,KLLN,KIZ
GO Process	GO:0016043	Cellular component organization	57	5447	0.45	2.16e-15	NUP107,DOCK7,TUBG1,BRIP1,CREBBP,SMARCB1,EP300,CENPE,NBN,TINF2,FANCM,ERBB2,ATM,KAT6B,BUB1B,CDT1,TUBA1A,BPTF,TERT,ATRIP,SMC1A,ZNF335,TUBB,MCPH1,ATR,CDK5RAP2,ARID1B,ATG7,SMARCAL1,NF1,DNA2,PCNT,CENPF,SYNE1,KDM5B,ASPM,DKC1,STIL,PTEN,ATRX,ASXL1,FANCG,RAD50,CEP152,CENPJ,BRPF1,FANCA,ERCC2,CHD2,NDE1,PAFAH1B1,TCF4,INPP5K,HYLS1,EHMT1,GTF2H5,KIZ
GO Process	GO:0006281	DNA repair	23	522	2023-07-01	3.32e-15	BRIP1,PALB2,HERC2,SMARCB1,EP300,NBN,FANCM,ATM,FANCI,ATRIP,SMC1A,PNKP,ATR,SMARCAL1,DNA2,ATRX,FANCG,RAD50,FANCA,ERCC2,RBBP8,FANCL,GTF2H5
GO Process	GO:0051726	Regulation of cell cycle	31	1230	0.83	3.91e-15	TSC2,TUBG1,BRIP1,EP300,CENPE,NBN,ATM,BUB1B,CDT1,TUBA1A,TERT,ATRIP,TUBB,MCPH1,ATR,CDK5RAP2,DNA2,PCNT,CENPF,ASPM,STIL,PTEN,ATRX,CEP152,CENPJ,ERCC2,NDE1,PAFAH1B1,RBBP8,KLLN,EHMT1
GO Process	GO:0007049	Cell cycle	31	1313	0.8	1.87e-14	TUBG1,BRIP1,SMARCB1,EP300,CENPE,NBN,FANCM,ATM,BUB1B,CDT1,TUBA1A,FANCI,SMC1A,TUBB,MCPH1,CDK5RAP2,DNA2,PCNT,CENPF,ASPM,STIL,ATRX,RAD50,CEP152,CENPJ,FANCA,NDE1,PAFAH1B1,RBBP8,KLLN,KIZ
GO Process	GO:0010564	Regulation of cell cycle process	24	760	0.93	4.53e-13	TUBG1,EP300,CENPE,NBN,ATM,BUB1B,CDT1,TUBA1A,TERT,TUBB,MCPH1,CDK5RAP2,PCNT,CENPF,STIL,PTEN,ATRX,CEP152,CENPJ,ERCC2,NDE1,PAFAH1B1,RBBP8,EHMT1
GO Process	GO:0006974	Cellular response to dna damage stimulus	24	793	0.91	1.04e-12	BRIP1,PALB2,HERC2,SMARCB1,EP300,NBN,FANCM,ATM,FANCI,ATRIP,SMC1A,PNKP,ATR,SMARCAL1,DNA2,ATRX,FANCG,RAD50,FANCA,ERCC2,CHD2,RBBP8,FANCL,GTF2H5
GO Process	GO:1901990	Regulation of mitotic cell cycle phase transition	19	416	2023-09-01	1.40e-12	TUBG1,EP300,CENPE,NBN,ATM,BUB1B,CDT1,TUBA1A,TERT,TUBB,CDK5RAP2,PCNT,CENPF,PTEN,CEP152,CENPJ,ERCC2,NDE1,PAFAH1B1
GO Process	GO:1903047	Mitotic cell cycle process	21	616	0.96	7.99e-12	TUBG1,EP300,CENPE,NBN,ATM,BUB1B,CDT1,TUBA1A,SMC1A,TUBB,MCPH1,CDK5RAP2,DNA2,PCNT,CENPF,STIL,CEP152,CENPJ,NDE1,PAFAH1B1,RBBP8
GO Process	GO:0007346	Regulation of mitotic cell cycle	21	676	0.92	4.35e-11	TUBG1,EP300,CENPE,NBN,ATM,BUB1B,CDT1,TUBA1A,TERT,TUBB,MCPH1,CDK5RAP2,PCNT,CENPF,PTEN,ATRX,CEP152,CENPJ,ERCC2,NDE1,PAFAH1B1
GO Process	GO:0022607	Cellular component assembly	35	2359	0.6	4.86e-11	NUP107,TUBG1,BRIP1,CREBBP,SMARCB1,EP300,CENPE,NBN,TINF2,KAT6B,CDT1,TUBA1A,TERT,SMC1A,TUBB,CDK5RAP2,ARID1B,ATG7,SMARCAL1,DNA2,PCNT,CENPF,ASPM,PTEN,ATRX,CEP152,CENPJ,FANCA,ERCC2,NDE1,PAFAH1B1,TCF4,INPP5K,HYLS1,GTF2H5
GO Process	GO:0044085	Cellular component biogenesis	36	2583	0.57	1.01e-10	NUP107,TUBG1,BRIP1,CREBBP,SMARCB1,EP300,CENPE,NBN,TINF2,KAT6B,CDT1,TUBA1A,TERT,SMC1A,TUBB,CDK5RAP2,ARID1B,ATG7,SMARCAL1,DNA2,PCNT,CENPF,ASPM,DKC1,PTEN,ATRX,CEP152,CENPJ,FANCA,ERCC2,NDE1,PAFAH1B1,TCF4,INPP5K,HYLS1,GTF2H5
GO Process	GO:0033554	Cellular response to stress	30	1725	0.67	1.13e-10	BRIP1,PALB2,HERC2,CREBBP,PRDX1,SMARCB1,EP300,NBN,FANCM,ATM,TERT,FANCI,ATRIP,SMC1A,PNKP,ATR,ATG7,SMARCAL1,NF1,DNA2,PTEN,ATRX,FANCG,RAD50,FANCA,ERCC2,CHD2,RBBP8,FANCL,GTF2H5
GO Process	GO:0033044	Regulation of chromosome organization	16	359	2023-08-01	2.86e-10	SMARCB1,CENPE,NBN,TINF2,ATM,BUB1B,CDT1,PNKP,ZNF335,MCPH1,ATR,CDK5RAP2,CENPF,DKC1,ATRX,RAD50
GO Process	GO:0032508	DNA duplex unwinding	11	106	1.44	3.32e-10	BRIP1,NBN,FANCM,ATRIP,SMARCAL1,DNA2,ATRX,RAD50,ERCC2,CHD2,GTF2H5
GO Process	GO:0006260	DNA replication	13	205	1.23	7.27e-10	BRIP1,NBN,FANCM,ATM,CDT1,ATRIP,PNKP,ATR,SMARCAL1,DNA2,ATRX,RAD50,RBBP8
GO Process	GO:0090304	Nucleic acid metabolic process	32	2178	0.6	9.16e-10	BRIP1,PALB2,HERC2,CREBBP,SMARCB1,EP300,NBN,TINF2,FANCM,ATM,TERT,FANCI,ATRIP,SMC1A,PNKP,ATR,SMARCAL1,DNA2,CENPF,DKC1,PTEN,ATRX,AR,ASXL1,FANCG,RAD50,FANCA,ERCC2,RBBP8,FANCL,EHMT1,GTF2H5
GO Process	GO:0051171	Regulation of nitrogen compound metabolic process	51	5836	0.37	1.18e-09	TSC2,NUP107,DOCK7,BRIP1,CREBBP,PRDX1,SMARCB1,EP300,CENPE,NBN,TINF2,FANCM,ERBB2,ATM,KAT6B,CDT1,BPTF,TERT,FANCI,ATRIP,PNKP,ZNF335,MCPH1,ATR,CDK5RAP2,ARID1B,ATG7,SMARCAL1,NF1,CENPF,KDM5B,DKC1,PTEN,ATRX,AR,ASXL1,RAD50,CENPJ,BRPF1,FANCA,ERCC2,PAX3,CHD2,PAFAH1B1,TCF4,RBBP8,INPP5K,EHMT1,WWOX,CIC,GTF2H5
GO Process	GO:0000226	Microtubule cytoskeleton organization	17	492	0.97	1.89e-09	DOCK7,TUBG1,CENPE,TUBA1A,SMC1A,TUBB,MCPH1,CDK5RAP2,PCNT,ASPM,STIL,ATRX,CEP152,CENPJ,NDE1,PAFAH1B1,KIZ
GO Process	GO:0010556	Regulation of macromolecule biosynthetic process	42	3976	0.45	1.90e-09	NUP107,BRIP1,CREBBP,SMARCB1,EP300,NBN,TINF2,ERBB2,ATM,KAT6B,CDT1,BPTF,TERT,PNKP,ZNF335,MCPH1,ATR,CDK5RAP2,ARID1B,ATG7,SMARCAL1,DNA2,CENPF,KDM5B,DKC1,PTEN,ATRX,AR,ASXL1,CENPJ,BRPF1,FANCA,ERCC2,PAX3,CHD2,TCF4,RBBP8,INPP5K,EHMT1,WWOX,CIC,GTF2H5
GO Process	GO:0019219	Regulation of nucleobase-containing compound metabolic process	42	3982	0.45	1.93e-09	NUP107,BRIP1,CREBBP,SMARCB1,EP300,NBN,TINF2,ERBB2,ATM,KAT6B,CDT1,BPTF,TERT,ATRIP,PNKP,ZNF335,MCPH1,ATR,CDK5RAP2,ARID1B,SMARCAL1,CENPF,KDM5B,DKC1,PTEN,ATRX,AR,ASXL1,RAD50,CENPJ,BRPF1,FANCA,ERCC2,PAX3,CHD2,TCF4,RBBP8,INPP5K,EHMT1,WWOX,CIC,GTF2H5
GO Process	GO:0009889	Regulation of biosynthetic process	43	4210	0.44	2.42e-09	NUP107,BRIP1,CREBBP,SMARCB1,EP300,NBN,TINF2,ERBB2,ATM,KAT6B,CDT1,BPTF,TERT,ATRIP,PNKP,ZNF335,MCPH1,ATR,CDK5RAP2,ARID1B,ATG7,SMARCAL1,DNA2,CENPF,KDM5B,DKC1,PTEN,ATRX,AR,ASXL1,CENPJ,BRPF1,FANCA,ERCC2,PAX3,CHD2,TCF4,RBBP8,INPP5K,EHMT1,WWOX,CIC,GTF2H5
GO Process	GO:0031323	Regulation of cellular metabolic process	52	6239	0.35	3.05e-09	TSC2,NUP107,DOCK7,BRIP1,CREBBP,PRDX1,SMARCB1,EP300,CENPE,NBN,TINF2,FANCM,ERBB2,ATM,KAT6B,CDT1,BPTF,TERT,FANCI,ATRIP,PNKP,ZNF335,MCPH1,ATR,CDK5RAP2,ARID1B,ATG7,SMARCAL1,NF1,DNA2,CENPF,KDM5B,DKC1,PTEN,ATRX,AR,ASXL1,RAD50,CENPJ,BRPF1,FANCA,ERCC2,PAX3,CHD2,PAFAH1B1,TCF4,RBBP8,INPP5K,EHMT1,WWOX,CIC,GTF2H5
GO Process	GO:0080090	Regulation of primary metabolic process	51	6032	0.36	3.75e-09	TSC2,NUP107,DOCK7,BRIP1,CREBBP,PRDX1,SMARCB1,EP300,CENPE,NBN,TINF2,FANCM,ERBB2,ATM,KAT6B,CDT1,BPTF,TERT,FANCI,ATRIP,PNKP,ZNF335,MCPH1,ATR,CDK5RAP2,ARID1B,ATG7,SMARCAL1,NF1,CENPF,KDM5B,DKC1,PTEN,ATRX,AR,ASXL1,RAD50,CENPJ,BRPF1,FANCA,ERCC2,PAX3,CHD2,PAFAH1B1,TCF4,RBBP8,INPP5K,EHMT1,WWOX,CIC,GTF2H5
GO Process	GO:2000112	Regulation of cellular macromolecule biosynthetic process	41	3878	0.45	3.75e-09	NUP107,BRIP1,CREBBP,SMARCB1,EP300,NBN,TINF2,ERBB2,ATM,KAT6B,CDT1,BPTF,TERT,PNKP,ZNF335,MCPH1,ATR,CDK5RAP2,ARID1B,ATG7,SMARCAL1,DNA2,CENPF,KDM5B,DKC1,PTEN,ATRX,AR,ASXL1,BRPF1,FANCA,ERCC2,PAX3,CHD2,TCF4,RBBP8,INPP5K,EHMT1,WWOX,CIC,GTF2H5
GO Process	GO:0031326	Regulation of cellular biosynthetic process	42	4125	0.44	5.44e-09	NUP107,BRIP1,CREBBP,SMARCB1,EP300,NBN,TINF2,ERBB2,ATM,KAT6B,CDT1,BPTF,TERT,PNKP,ZNF335,MCPH1,ATR,CDK5RAP2,ARID1B,ATG7,SMARCAL1,DNA2,CENPF,KDM5B,DKC1,PTEN,ATRX,AR,ASXL1,CENPJ,BRPF1,FANCA,ERCC2,PAX3,CHD2,TCF4,RBBP8,INPP5K,EHMT1,WWOX,CIC,GTF2H5
GO Process	GO:0010389	Regulation of g2/m transition of mitotic cell cycle	12	198	1.21	6.39e-09	TUBG1,NBN,ATM,TUBA1A,TUBB,CDK5RAP2,PCNT,CENPF,CEP152,CENPJ,NDE1,PAFAH1B1
GO Process	GO:0060255	Regulation of macromolecule metabolic process	52	6407	0.34	7.99e-09	TSC2,NUP107,DOCK7,BRIP1,CREBBP,PRDX1,SMARCB1,EP300,CENPE,NBN,TINF2,FANCM,ERBB2,ATM,KAT6B,CDT1,BPTF,TERT,FANCI,ATRIP,PNKP,ZNF335,MCPH1,ATR,CDK5RAP2,ARID1B,ATG7,SMARCAL1,NF1,DNA2,CENPF,KDM5B,DKC1,PTEN,ATRX,AR,ASXL1,RAD50,CENPJ,BRPF1,FANCA,ERCC2,PAX3,CHD2,PAFAH1B1,TCF4,RBBP8,INPP5K,EHMT1,WWOX,CIC,GTF2H5
GO Process	GO:0045786	Negative regulation of cell cycle	17	571	0.9	1.32e-08	BRIP1,EP300,NBN,ATM,BUB1B,CDT1,ATRIP,MCPH1,ATR,CDK5RAP2,DNA2,CENPF,PTEN,ATRX,RBBP8,KLLN,EHMT1
GO Process	GO:0051321	Meiotic cell cycle	12	220	1.16	1.83e-08	TUBG1,BRIP1,NBN,FANCM,ATM,BUB1B,SMC1A,ASPM,ATRX,RAD50,FANCA,RBBP8
GO Process	GO:1901796	Regulation of signal transduction by p53 class mediator	11	182	1.21	4.28e-08	BRIP1,EP300,NBN,ATM,ATRIP,ATR,DNA2,RAD50,BRPF1,RBBP8,EHMT1
GO Process	GO:0097711	Ciliary basal body-plasma membrane docking	9	95	2023-04-01	5.42e-08	TUBG1,TUBA1A,TUBB,CDK5RAP2,PCNT,CEP152,CENPJ,NDE1,PAFAH1B1
GO Process	GO:0033043	Regulation of organelle organization	23	1306	0.67	6.98e-08	TSC2,SMARCB1,EP300,CENPE,NBN,TINF2,ATM,BUB1B,CDT1,ATRIP,PNKP,ZNF335,MCPH1,ATR,CDK5RAP2,CENPF,DKC1,STIL,ATRX,RAD50,CENPJ,PAFAH1B1,INPP5K
GO Process	GO:0007051	Spindle organization	10	145	1.27	8.69e-08	TUBG1,CENPE,SMC1A,TUBB,PCNT,ASPM,STIL,ATRX,CENPJ,KIZ
GO Process	GO:0032502	Developmental process	48	5841	0.34	8.69e-08	TSC2,NUP107,DOCK7,BRIP1,PALB2,HERC2,CREBBP,PRDX1,SMARCB1,EP300,CENPE,NBN,ERBB2,ATM,BPTF,TERT,ATRIP,SMC1A,ZNF335,MCPH1,ATR,CDK5RAP2,ARID1B,ATG7,NF1,CENPF,SYNE1,KDM5B,ASPM,STIL,PTEN,ATRX,AR,ASXL1,FANCG,CEP152,FANCA,ERCC2,PAX3,CHD2,NDE1,PAFAH1B1,TCF4,RBBP8,INPP5K,PAFAH1B3,WWOX,CIC
GO Process	GO:0034645	Cellular macromolecule biosynthetic process	25	1592	0.62	9.04e-08	DHPS,BRIP1,CREBBP,SMARCB1,NBN,FANCM,ATM,CDT1,TERT,ATRIP,PNKP,ATR,ATG7,SMARCAL1,DNA2,CENPF,DKC1,PTEN,ATRX,AR,ASXL1,RAD50,ERCC2,RBBP8,GTF2H5
GO Process	GO:0007059	Chromosome segregation	12	268	2023-08-01	1.29e-07	TUBG1,BRIP1,CENPE,FANCM,ATM,BUB1B,CDT1,SMC1A,CDK5RAP2,CENPF,ERCC2,NDE1
GO Process	GO:0051301	Cell division	15	493	0.91	1.29e-07	DOCK7,BRIP1,CENPE,BUB1B,CDT1,TUBA1A,SMC1A,TUBB,CENPF,ASPM,CENPJ,ERCC2,NDE1,PAFAH1B1,RBBP8
GO Process	GO:0000723	Telomere maintenance	9	112	1.33	1.67e-07	NBN,TINF2,ATM,TERT,ATR,SMARCAL1,DNA2,DKC1,RAD50
GO Process	GO:0051128	Regulation of cellular component organization	30	2402	0.52	1.67e-07	TSC2,SMARCB1,EP300,CENPE,NBN,TINF2,ERBB2,ATM,BUB1B,CDT1,TUBA1A,ATRIP,PNKP,ZNF335,TUBB,MCPH1,ATR,CDK5RAP2,CENPF,DKC1,STIL,PTEN,ATRX,AR,RAD50,CENPJ,ERCC2,PAFAH1B1,INPP5K,GTF2H5
GO Process	GO:1902850	Microtubule cytoskeleton organization involved in mitosis	9	112	1.33	1.67e-07	TUBG1,CENPE,SMC1A,MCPH1,CDK5RAP2,PCNT,STIL,NDE1,PAFAH1B1
GO Process	GO:0051640	Organelle localization	16	598	0.86	1.68e-07	DOCK7,TUBG1,CENPE,ATM,CDT1,TUBA1A,TUBB,MCPH1,CDK5RAP2,PCNT,CENPF,ASPM,CEP152,CENPJ,NDE1,PAFAH1B1
GO Process	GO:0022414	Reproductive process	23	1400	0.64	2.02e-07	NUP107,TUBG1,BRIP1,HERC2,NBN,FANCM,ATM,BUB1B,BPTF,SMC1A,SYNE1,KDM5B,ASPM,PTEN,ATRX,AR,FANCG,RAD50,FANCA,PAFAH1B1,RBBP8,FANCL,PAFAH1B3
GO Process	GO:0050794	Regulation of cellular process	65	10932	0.2	2.07e-07	DHPS,TSC2,NUP107,DOCK7,TUBG1,BRIP1,PALB2,CREBBP,PRDX1,SMARCB1,EP300,CENPE,NBN,TINF2,FANCM,ERBB2,ATM,KAT6B,BUB1B,CDT1,TUBA1A,BPTF,TERT,FANCI,ATRIP,PNKP,ZNF335,TUBB,MCPH1,ATR,CDK5RAP2,ARID1B,ATG7,SMARCAL1,NF1,DNA2,PCNT,CENPF,KDM5B,ASPM,DKC1,STIL,PTEN,ATRX,AR,ASXL1,RAD50,CEP152,CENPJ,BRPF1,FANCA,ERCC2,PAX3,CHD2,NDE1,PAFAH1B1,TCF4,RBBP8,FANCL,KLLN,INPP5K,EHMT1,WWOX,CIC,GTF2H5
GO Process	GO:0000729	DNA double-strand break processing	6	23	1.84	2.14e-07	BRIP1,NBN,ATM,DNA2,RAD50,RBBP8
GO Process	GO:0000280	Nuclear division	12	291	2023-04-01	2.58e-07	TUBG1,BRIP1,CENPE,FANCM,ATM,BUB1B,CDT1,SMC1A,ASPM,RAD50,FANCA,NDE1
GO Process	GO:0048856	Anatomical structure development	45	5402	0.35	3.06e-07	TSC2,NUP107,DOCK7,BRIP1,PALB2,CREBBP,PRDX1,SMARCB1,EP300,CENPE,NBN,ERBB2,ATM,BPTF,TERT,ATRIP,ZNF335,MCPH1,ATR,CDK5RAP2,ARID1B,NF1,CENPF,SYNE1,KDM5B,ASPM,STIL,PTEN,ATRX,AR,ASXL1,FANCG,CEP152,FANCA,ERCC2,PAX3,CHD2,NDE1,PAFAH1B1,TCF4,RBBP8,INPP5K,PAFAH1B3,WWOX,CIC
GO Process	GO:0044260	Cellular macromolecule metabolic process	43	4976	0.36	3.36e-07	DHPS,NUP107,BRIP1,PALB2,HERC2,CREBBP,SMARCB1,EP300,NBN,TINF2,FANCM,ERBB2,ATM,KAT6B,BUB1B,CDT1,TERT,FANCI,ATRIP,SMC1A,PNKP,ZNF335,ATR,ATG7,SMARCAL1,NF1,DNA2,CENPF,KDM5B,DKC1,PTEN,ATRX,AR,ASXL1,FANCG,RAD50,BRPF1,FANCA,ERCC2,RBBP8,FANCL,EHMT1,GTF2H5
GO Process	GO:0032204	Regulation of telomere maintenance	8	83	1.41	3.38e-07	NBN,TINF2,ATM,PNKP,ATR,DKC1,ATRX,RAD50
GO Process	GO:0032206	Positive regulation of telomere maintenance	7	51	1.57	3.73e-07	NBN,ATM,PNKP,ATR,DKC1,ATRX,RAD50
GO Process	GO:0007275	Multicellular organism development	43	5023	0.36	4.23e-07	TSC2,NUP107,DOCK7,BRIP1,PALB2,CREBBP,PRDX1,SMARCB1,EP300,CENPE,NBN,ERBB2,ATM,BPTF,TERT,ATRIP,ZNF335,MCPH1,ATR,CDK5RAP2,ARID1B,NF1,CENPF,KDM5B,ASPM,STIL,PTEN,ATRX,AR,ASXL1,FANCG,FANCA,ERCC2,PAX3,CHD2,NDE1,PAFAH1B1,TCF4,RBBP8,INPP5K,PAFAH1B3,WWOX,CIC
GO Process	GO:0000086	G2/M transition of mitotic cell cycle	9	134	1.26	5.51e-07	TUBG1,TUBA1A,TUBB,CDK5RAP2,PCNT,CEP152,CENPJ,NDE1,PAFAH1B1
GO Process	GO:1903506	Regulation of nucleic acid-templated transcription	35	3447	0.43	5.57e-07	NUP107,BRIP1,CREBBP,SMARCB1,EP300,ERBB2,ATM,KAT6B,CDT1,BPTF,TERT,ZNF335,MCPH1,CDK5RAP2,ARID1B,SMARCAL1,CENPF,KDM5B,PTEN,ATRX,AR,ASXL1,CENPJ,BRPF1,FANCA,ERCC2,PAX3,CHD2,TCF4,RBBP8,INPP5K,EHMT1,WWOX,CIC,GTF2H5
GO Process	GO:0036297	Interstrand cross-link repair	7	56	1.53	5.97e-07	FANCM,FANCI,ATRIP,ATR,FANCG,FANCA,FANCL
GO Process	GO:0048523	Negative regulation of cellular process	42	4874	0.36	5.97e-07	TSC2,BRIP1,PALB2,CREBBP,SMARCB1,EP300,NBN,TINF2,ERBB2,ATM,KAT6B,BUB1B,CDT1,BPTF,TERT,ATRIP,PNKP,MCPH1,ATR,CDK5RAP2,ATG7,SMARCAL1,NF1,DNA2,CENPF,KDM5B,ASPM,DKC1,STIL,PTEN,ATRX,AR,ASXL1,RAD50,CENPJ,PAFAH1B1,RBBP8,KLLN,INPP5K,EHMT1,WWOX,CIC
GO Process	GO:0007010	Cytoskeleton organization	20	1126	0.68	6.75e-07	DOCK7,TUBG1,CENPE,TUBA1A,SMC1A,TUBB,MCPH1,CDK5RAP2,NF1,PCNT,SYNE1,ASPM,STIL,ATRX,CEP152,CENPJ,NDE1,PAFAH1B1,INPP5K,KIZ
GO Process	GO:0071103	DNA conformation change	12	328	0.99	7.21e-07	BRIP1,NBN,FANCM,KAT6B,ATRIP,SMARCAL1,DNA2,ATRX,RAD50,ERCC2,CHD2,GTF2H5
GO Process	GO:0060322	Head development	17	788	0.76	7.52e-07	DOCK7,EP300,ATM,BPTF,ZNF335,MCPH1,CDK5RAP2,NF1,CENPF,ASPM,STIL,PTEN,ATRX,NDE1,PAFAH1B1,PAFAH1B3,CIC
GO Process	GO:0000075	Cell cycle checkpoint	10	198	1.13	8.19e-07	BRIP1,EP300,NBN,ATM,BUB1B,CDT1,ATRIP,ATR,DNA2,CENPF
GO Process	GO:0031324	Negative regulation of cellular metabolic process	30	2630	0.49	9.10e-07	TSC2,CREBBP,SMARCB1,EP300,NBN,TINF2,ATM,KAT6B,BPTF,TERT,PNKP,MCPH1,ATR,ATG7,SMARCAL1,NF1,CENPF,KDM5B,DKC1,PTEN,ATRX,AR,RAD50,CENPJ,PAFAH1B1,RBBP8,INPP5K,EHMT1,WWOX,CIC
GO Process	GO:0051252	Regulation of rna metabolic process	36	3722	0.41	9.15e-07	NUP107,BRIP1,CREBBP,SMARCB1,EP300,ERBB2,ATM,KAT6B,CDT1,BPTF,TERT,ZNF335,MCPH1,CDK5RAP2,ARID1B,SMARCAL1,CENPF,KDM5B,DKC1,PTEN,ATRX,AR,ASXL1,CENPJ,BRPF1,FANCA,ERCC2,PAX3,CHD2,TCF4,RBBP8,INPP5K,EHMT1,WWOX,CIC,GTF2H5
GO Process	GO:0006302	Double-strand break repair	10	204	2023-12-01	1.04e-06	BRIP1,PALB2,HERC2,NBN,FANCM,ATM,SMARCAL1,DNA2,RAD50,RBBP8
GO Process	GO:0006355	Regulation of transcription, dna-templated	34	3388	0.43	1.27e-06	NUP107,BRIP1,CREBBP,SMARCB1,EP300,ERBB2,ATM,KAT6B,CDT1,BPTF,TERT,ZNF335,MCPH1,CDK5RAP2,ARID1B,SMARCAL1,CENPF,KDM5B,PTEN,ATRX,AR,ASXL1,BRPF1,FANCA,ERCC2,PAX3,CHD2,TCF4,RBBP8,INPP5K,EHMT1,WWOX,CIC,GTF2H5
GO Process	GO:0065007	Biological regulation	67	12171	0.17	1.45e-06	DHPS,TSC2,NUP107,DOCK7,TUBG1,BRIP1,PALB2,HERC2,CREBBP,PRDX1,SMARCB1,EP300,CENPE,NBN,TINF2,FANCM,ERBB2,ATM,KAT6B,BUB1B,CDT1,TUBA1A,BPTF,TERT,FANCI,ATRIP,PNKP,ZNF335,TUBB,MCPH1,ATR,CDK5RAP2,ARID1B,ATG7,SMARCAL1,NF1,DNA2,PCNT,CENPF,SYNE1,KDM5B,ASPM,DKC1,STIL,PTEN,ATRX,AR,ASXL1,RAD50,CEP152,CENPJ,BRPF1,FANCA,ERCC2,PAX3,CHD2,NDE1,PAFAH1B1,TCF4,RBBP8,FANCL,KLLN,INPP5K,EHMT1,WWOX,CIC,GTF2H5
GO Process	GO:0031325	Positive regulation of cellular metabolic process	34	3413	0.43	1.50e-06	TSC2,DOCK7,CREBBP,SMARCB1,EP300,CENPE,NBN,FANCM,ERBB2,ATM,KAT6B,CDT1,BPTF,TERT,FANCI,PNKP,ATR,CDK5RAP2,ARID1B,ATG7,DNA2,DKC1,PTEN,ATRX,AR,ASXL1,RAD50,CENPJ,BRPF1,ERCC2,PAX3,TCF4,INPP5K,WWOX
GO Process	GO:0044772	Mitotic cell cycle phase transition	11	280	2023-02-01	1.50e-06	TUBG1,CDT1,TUBA1A,TUBB,CDK5RAP2,PCNT,CEP152,CENPJ,NDE1,PAFAH1B1,RBBP8
GO Process	GO:0010605	Negative regulation of macromolecule metabolic process	31	2875	0.46	1.56e-06	TSC2,BRIP1,CREBBP,SMARCB1,EP300,NBN,TINF2,ATM,KAT6B,BPTF,TERT,PNKP,MCPH1,ATR,ATG7,SMARCAL1,NF1,CENPF,KDM5B,DKC1,PTEN,ATRX,AR,RAD50,CENPJ,PAFAH1B1,RBBP8,INPP5K,EHMT1,WWOX,CIC
GO Process	GO:0010557	Positive regulation of macromolecule biosynthetic process	25	1906	0.55	1.77e-06	CREBBP,SMARCB1,EP300,ERBB2,ATM,KAT6B,CDT1,BPTF,TERT,PNKP,ATR,CDK5RAP2,ARID1B,DNA2,DKC1,ATRX,AR,ASXL1,CENPJ,BRPF1,ERCC2,PAX3,TCF4,INPP5K,WWOX
GO Process	GO:0070198	Protein localization to chromosome, telomeric region	5	16	1.92	1.77e-06	TINF2,ATM,TERT,ATR,ATRX
GO Process	GO:0070925	Organelle assembly	16	735	0.77	1.77e-06	TUBG1,CENPE,TUBA1A,SMC1A,TUBB,CDK5RAP2,ATG7,PCNT,CENPF,ASPM,PTEN,CEP152,CENPJ,NDE1,PAFAH1B1,HYLS1
GO Process	GO:0007420	Brain development	16	745	0.76	2.06e-06	DOCK7,ATM,BPTF,ZNF335,MCPH1,CDK5RAP2,NF1,CENPF,ASPM,STIL,PTEN,ATRX,NDE1,PAFAH1B1,PAFAH1B3,CIC
GO Process	GO:0034641	Cellular nitrogen compound metabolic process	33	3282	0.43	2.07e-06	DHPS,BRIP1,PALB2,HERC2,CREBBP,SMARCB1,EP300,NBN,TINF2,FANCM,ATM,TERT,FANCI,ATRIP,SMC1A,PNKP,ATR,SMARCAL1,DNA2,CENPF,DKC1,PTEN,ATRX,AR,ASXL1,FANCG,RAD50,FANCA,ERCC2,RBBP8,FANCL,EHMT1,GTF2H5
GO Process	GO:0045935	Positive regulation of nucleobase-containing compound metabolic process	25	1927	0.54	2.07e-06	CREBBP,SMARCB1,EP300,NBN,ERBB2,ATM,KAT6B,BPTF,TERT,PNKP,ATR,CDK5RAP2,ARID1B,DKC1,ATRX,AR,ASXL1,RAD50,CENPJ,BRPF1,ERCC2,PAX3,TCF4,INPP5K,WWOX
GO Process	GO:0033047	Regulation of mitotic sister chromatid segregation	7	71	1.42	2.11e-06	CENPE,ATM,BUB1B,CDT1,CDK5RAP2,CENPF,ATRX
GO Process	GO:1903046	Meiotic cell cycle process	9	165	1.16	2.18e-06	TUBG1,BRIP1,FANCM,ATM,BUB1B,ASPM,ATRX,RAD50,FANCA
GO Process	GO:0009892	Negative regulation of metabolic process	32	3124	0.44	2.40e-06	TSC2,DOCK7,BRIP1,CREBBP,SMARCB1,EP300,NBN,TINF2,ATM,KAT6B,BPTF,TERT,PNKP,MCPH1,ATR,ATG7,SMARCAL1,NF1,CENPF,KDM5B,DKC1,PTEN,ATRX,AR,RAD50,CENPJ,PAFAH1B1,RBBP8,INPP5K,EHMT1,WWOX,CIC
GO Process	GO:0007417	Central nervous system development	18	988	0.69	2.49e-06	DOCK7,ERBB2,ATM,BPTF,ZNF335,MCPH1,CDK5RAP2,NF1,CENPF,ASPM,STIL,PTEN,ATRX,ERCC2,NDE1,PAFAH1B1,PAFAH1B3,CIC
GO Process	GO:0009893	Positive regulation of metabolic process	36	3893	0.39	2.49e-06	TSC2,DOCK7,CREBBP,SMARCB1,EP300,CENPE,NBN,FANCM,ERBB2,ATM,KAT6B,CDT1,BPTF,TERT,FANCI,PNKP,ATR,CDK5RAP2,ARID1B,ATG7,DNA2,KDM5B,DKC1,PTEN,ATRX,AR,ASXL1,RAD50,CENPJ,BRPF1,ERCC2,PAX3,TCF4,INPP5K,EHMT1,WWOX
GO Process	GO:0048519	Negative regulation of biological process	43	5389	0.33	2.67e-06	TSC2,DOCK7,BRIP1,PALB2,CREBBP,SMARCB1,EP300,NBN,TINF2,ERBB2,ATM,KAT6B,BUB1B,CDT1,BPTF,TERT,ATRIP,PNKP,MCPH1,ATR,CDK5RAP2,ATG7,SMARCAL1,NF1,DNA2,CENPF,KDM5B,ASPM,DKC1,STIL,PTEN,ATRX,AR,ASXL1,RAD50,CENPJ,PAFAH1B1,RBBP8,KLLN,INPP5K,EHMT1,WWOX,CIC
GO Process	GO:0048513	Animal organ development	32	3197	0.43	3.98e-06	TSC2,NUP107,DOCK7,BRIP1,PALB2,EP300,ERBB2,ATM,BPTF,ATRIP,ZNF335,MCPH1,CDK5RAP2,NF1,CENPF,KDM5B,ASPM,STIL,PTEN,ATRX,AR,ASXL1,FANCG,FANCA,ERCC2,PAX3,CHD2,NDE1,PAFAH1B1,PAFAH1B3,WWOX,CIC
GO Process	GO:0031328	Positive regulation of cellular biosynthetic process	25	2005	0.52	4.03e-06	CREBBP,SMARCB1,EP300,ERBB2,ATM,KAT6B,CDT1,BPTF,TERT,PNKP,ATR,CDK5RAP2,ARID1B,DNA2,DKC1,ATRX,AR,ASXL1,CENPJ,BRPF1,ERCC2,PAX3,TCF4,INPP5K,WWOX
GO Process	GO:0010604	Positive regulation of macromolecule metabolic process	34	3600	0.4	4.67e-06	DOCK7,CREBBP,SMARCB1,EP300,CENPE,NBN,FANCM,ERBB2,ATM,KAT6B,CDT1,BPTF,TERT,FANCI,PNKP,ATR,CDK5RAP2,ARID1B,ATG7,DNA2,KDM5B,DKC1,PTEN,ATRX,AR,ASXL1,RAD50,CENPJ,BRPF1,ERCC2,PAX3,TCF4,INPP5K,WWOX
GO Process	GO:2001252	Positive regulation of chromosome organization	9	184	2023-12-01	4.81e-06	SMARCB1,NBN,ATM,CDT1,PNKP,ATR,DKC1,ATRX,RAD50
GO Process	GO:0048731	System development	38	4426	0.36	5.28e-06	TSC2,NUP107,DOCK7,BRIP1,PALB2,PRDX1,SMARCB1,EP300,NBN,ERBB2,ATM,BPTF,TERT,ATRIP,ZNF335,MCPH1,CDK5RAP2,ARID1B,NF1,CENPF,KDM5B,ASPM,STIL,PTEN,ATRX,AR,ASXL1,FANCG,FANCA,ERCC2,PAX3,CHD2,NDE1,PAFAH1B1,TCF4,PAFAH1B3,WWOX,CIC
GO Process	GO:0010948	Negative regulation of cell cycle process	11	328	0.95	5.47e-06	EP300,NBN,ATM,BUB1B,CDT1,CDK5RAP2,CENPF,PTEN,ATRX,RBBP8,EHMT1
GO Process	GO:0071824	protein-DNA complex subunit organization	10	255	2023-02-01	5.70e-06	SMARCB1,CENPE,KAT6B,CDT1,BPTF,CENPF,ATRX,ERCC2,TCF4,GTF2H5
GO Process	GO:0035264	Multicellular organism growth	7	86	1.34	6.10e-06	PALB2,EP300,ATM,STIL,ATRX,AR,ERCC2
GO Process	GO:0051129	Negative regulation of cellular component organization	15	713	0.75	6.59e-06	TSC2,SMARCB1,EP300,NBN,TINF2,ATM,BUB1B,CDK5RAP2,CENPF,PTEN,ATRX,AR,RAD50,PAFAH1B1,INPP5K
GO Process	GO:2001251	Negative regulation of chromosome organization	8	137	1.19	7.29e-06	SMARCB1,NBN,TINF2,ATM,BUB1B,CENPF,ATRX,RAD50
GO Process	GO:0006950	Response to stress	33	3485	0.4	7.37e-06	BRIP1,PALB2,HERC2,CREBBP,PRDX1,SMARCB1,EP300,NBN,FANCM,ERBB2,ATM,TERT,FANCI,ATRIP,SMC1A,PNKP,TUBB,ATR,ARID1B,ATG7,SMARCAL1,NF1,DNA2,PTEN,ATRX,FANCG,RAD50,FANCA,ERCC2,CHD2,RBBP8,FANCL,GTF2H5
GO Process	GO:0051172	Negative regulation of nitrogen compound metabolic process	27	2429	0.47	8.90e-06	TSC2,CREBBP,SMARCB1,EP300,NBN,TINF2,ATM,KAT6B,BPTF,TERT,PNKP,MCPH1,NF1,CENPF,KDM5B,DKC1,PTEN,ATRX,AR,RAD50,CENPJ,PAFAH1B1,RBBP8,INPP5K,EHMT1,WWOX,CIC
GO Process	GO:0120031	Plasma membrane bounded cell projection assembly	12	433	0.87	9.06e-06	TUBG1,TUBA1A,TUBB,CDK5RAP2,ARID1B,PCNT,CEP152,CENPJ,NDE1,PAFAH1B1,INPP5K,HYLS1
GO Process	GO:0030071	Regulation of mitotic metaphase/anaphase transition	6	56	1.46	1.20e-05	CENPE,ATM,BUB1B,CDT1,CDK5RAP2,CENPF
GO Process	GO:0098813	Nuclear chromosome segregation	9	209	2023-06-01	1.22e-05	TUBG1,BRIP1,CENPE,FANCM,ATM,BUB1B,CDT1,SMC1A,CENPF
GO Process	GO:0045934	Negative regulation of nucleobase-containing compound metabolic process	21	1528	0.57	1.27e-05	CREBBP,EP300,NBN,TINF2,ATM,KAT6B,BPTF,TERT,MCPH1,CENPF,KDM5B,DKC1,ATRX,AR,RAD50,CENPJ,RBBP8,INPP5K,EHMT1,WWOX,CIC
GO Process	GO:0031570	DNA integrity checkpoint	8	151	1.15	1.39e-05	BRIP1,EP300,NBN,ATM,CDT1,ATRIP,ATR,DNA2
GO Process	GO:0065004	protein-DNA complex assembly	9	213	2023-05-01	1.39e-05	SMARCB1,CENPE,KAT6B,CDT1,CENPF,ATRX,ERCC2,TCF4,GTF2H5
GO Process	GO:0006357	Regulation of transcription by rna polymerase ii	25	2172	0.49	1.59e-05	BRIP1,CREBBP,SMARCB1,EP300,ERBB2,ATM,KAT6B,BPTF,TERT,ZNF335,MCPH1,ARID1B,SMARCAL1,KDM5B,ATRX,AR,ASXL1,PAX3,CHD2,TCF4,RBBP8,EHMT1,WWOX,CIC,GTF2H5
GO Process	GO:0051173	Positive regulation of nitrogen compound metabolic process	31	3239	0.41	1.71e-05	DOCK7,CREBBP,SMARCB1,EP300,CENPE,NBN,FANCM,ERBB2,ATM,KAT6B,BPTF,TERT,FANCI,PNKP,ATR,CDK5RAP2,ARID1B,ATG7,DKC1,PTEN,ATRX,AR,ASXL1,RAD50,CENPJ,BRPF1,ERCC2,PAX3,TCF4,INPP5K,WWOX
GO Process	GO:0051298	Centrosome duplication	5	30	1.65	1.82e-05	CDK5RAP2,STIL,CEP152,CENPJ,NDE1
GO Process	GO:0048522	Positive regulation of cellular process	42	5579	0.3	2.20e-05	DHPS,TSC2,DOCK7,CREBBP,SMARCB1,EP300,CENPE,NBN,FANCM,ERBB2,ATM,KAT6B,CDT1,BPTF,TERT,FANCI,PNKP,ZNF335,ATR,CDK5RAP2,ARID1B,ATG7,NF1,DNA2,PCNT,KDM5B,ASPM,DKC1,PTEN,ATRX,AR,ASXL1,RAD50,CENPJ,BRPF1,ERCC2,PAX3,PAFAH1B1,TCF4,INPP5K,WWOX,GTF2H5
GO Process	GO:0048589	Developmental growth	11	389	0.88	2.44e-05	PALB2,EP300,NBN,ATM,KDM5B,ASPM,STIL,PTEN,ATRX,AR,ERCC2
GO Process	GO:0006275	Regulation of dna replication	7	111	1.23	2.66e-05	NBN,CDT1,ATR,ATG7,SMARCAL1,DNA2,ATRX
GO Process	GO:0010639	Negative regulation of organelle organization	11	395	0.87	2.74e-05	TSC2,SMARCB1,NBN,TINF2,ATM,BUB1B,CDK5RAP2,CENPF,ATRX,RAD50,INPP5K
GO Process	GO:0048518	Positive regulation of biological process	44	6112	0.29	2.96e-05	DHPS,TSC2,DOCK7,CREBBP,SMARCB1,EP300,CENPE,NBN,FANCM,ERBB2,ATM,KAT6B,CDT1,BPTF,TERT,FANCI,ATRIP,PNKP,ZNF335,ATR,CDK5RAP2,ARID1B,ATG7,NF1,DNA2,PCNT,KDM5B,ASPM,DKC1,PTEN,ATRX,AR,ASXL1,RAD50,CENPJ,BRPF1,ERCC2,PAX3,PAFAH1B1,TCF4,INPP5K,EHMT1,WWOX,GTF2H5
GO Process	GO:0051641	Cellular localization	29	2967	0.42	3.22e-05	TSC2,NUP107,DOCK7,TUBG1,HERC2,CENPE,TINF2,ATM,CDT1,TUBA1A,TERT,TUBB,MCPH1,ATR,CDK5RAP2,ATG7,NF1,PCNT,CENPF,SYNE1,ASPM,STIL,ATRX,CEP152,CENPJ,NDE1,PAFAH1B1,VPS53,INPP5K
GO Process	GO:0006325	Chromatin organization	14	713	0.72	3.61e-05	CREBBP,SMARCB1,EP300,ATM,KAT6B,BPTF,ZNF335,ARID1B,KDM5B,ATRX,ASXL1,BRPF1,CHD2,EHMT1
GO Process	GO:0032501	Multicellular organismal process	47	6933	0.26	4.46e-05	TSC2,NUP107,DOCK7,BRIP1,PALB2,HERC2,CREBBP,PRDX1,SMARCB1,EP300,CENPE,NBN,ERBB2,ATM,BPTF,TERT,ATRIP,SMC1A,ZNF335,MCPH1,ATR,CDK5RAP2,ARID1B,NF1,CENPF,SYNE1,KDM5B,ASPM,STIL,PTEN,ATRX,AR,ASXL1,FANCG,FANCA,ERCC2,PAX3,CHD2,NDE1,PAFAH1B1,TCF4,RBBP8,FANCL,INPP5K,PAFAH1B3,WWOX,CIC
GO Process	GO:0048608	Reproductive structure development	11	420	0.85	4.78e-05	NUP107,BRIP1,ATM,BPTF,KDM5B,ASPM,PTEN,ATRX,AR,FANCG,FANCA
GO Process	GO:0060271	Cilium assembly	10	339	0.9	5.71e-05	TUBG1,TUBA1A,TUBB,CDK5RAP2,PCNT,CEP152,CENPJ,NDE1,PAFAH1B1,HYLS1
GO Process	GO:0009314	Response to radiation	11	431	0.84	6.00e-05	CREBBP,EP300,ATM,ATRIP,SMC1A,PNKP,ATR,NF1,FANCG,ERCC2,GTF2H5
GO Process	GO:0043009	Chordate embryonic development	13	640	0.74	6.58e-05	TSC2,PALB2,EP300,NBN,ATM,BPTF,ZNF335,NF1,STIL,AR,ERCC2,RBBP8,INPP5K
GO Process	GO:0031399	Regulation of protein modification process	22	1870	0.5	6.93e-05	TSC2,DOCK7,PRDX1,SMARCB1,EP300,CENPE,NBN,TINF2,FANCM,ERBB2,ATM,FANCI,PNKP,ZNF335,ATG7,NF1,PTEN,ATRX,AR,RAD50,PAFAH1B1,INPP5K
GO Process	GO:0007399	Nervous system development	25	2371	0.45	7.15e-05	TSC2,DOCK7,SMARCB1,EP300,ERBB2,ATM,BPTF,TERT,ZNF335,MCPH1,CDK5RAP2,ARID1B,NF1,CENPF,ASPM,STIL,PTEN,ATRX,ERCC2,PAX3,NDE1,PAFAH1B1,TCF4,PAFAH1B3,CIC
GO Process	GO:0000726	Non-recombinational repair	6	81	2023-03-01	7.39e-05	HERC2,NBN,ATM,SMARCAL1,RAD50,RBBP8
GO Process	GO:0051054	Positive regulation of dna metabolic process	8	200	2023-03-01	8.89e-05	NBN,ATM,PNKP,ATR,DKC1,ATRX,RAD50,ERCC2
GO Process	GO:0051052	Regulation of dna metabolic process	10	360	0.87	9.19e-05	NBN,TINF2,ATM,CDT1,PNKP,ATR,DKC1,ATRX,RAD50,ERCC2
GO Process	GO:0009987	Cellular process	71	15024	0.1	9.65e-05	DHPS,TSC2,NUP107,DOCK7,TUBG1,BRIP1,PALB2,HERC2,CREBBP,PRDX1,SMARCB1,EP300,CENPE,NBN,TINF2,FANCM,ERBB2,ATM,KAT6B,BUB1B,CDT1,TUBA1A,BPTF,TERT,FANCI,ATRIP,SMC1A,PNKP,ZNF335,TUBB,MCPH1,ATR,CDK5RAP2,ARID1B,ATG7,SMARCAL1,NF1,DNA2,PCNT,CENPF,SYNE1,KDM5B,ASPM,DKC1,STIL,PTEN,ATRX,AR,ASXL1,FANCG,RAD50,CEP152,CENPJ,BRPF1,FANCA,ERCC2,PAX3,CHD2,NDE1,PAFAH1B1,TCF4,RBBP8,FANCL,KLLN,VPS53,INPP5K,HYLS1,EHMT1,WWOX…
GO Process	GO:0008406	Gonad development	8	205	2023-02-01	0.00010	NUP107,BRIP1,ATM,ASPM,ATRX,AR,FANCG,FANCA
GO Process	GO:0044249	Cellular biosynthetic process	26	2611	0.43	0.00011	DHPS,BRIP1,CREBBP,SMARCB1,NBN,FANCM,ATM,CDT1,TERT,ATRIP,PNKP,ATR,ATG7,SMARCAL1,DNA2,CENPF,DKC1,PTEN,ATRX,AR,ASXL1,RAD50,ERCC2,RBBP8,INPP5K,GTF2H5
GO Process	GO:0010468	Regulation of gene expression	37	4813	0.31	0.00012	NUP107,BRIP1,CREBBP,SMARCB1,EP300,ERBB2,ATM,KAT6B,CDT1,BPTF,TERT,ATRIP,ZNF335,MCPH1,CDK5RAP2,ARID1B,SMARCAL1,NF1,CENPF,KDM5B,DKC1,PTEN,ATRX,AR,ASXL1,BRPF1,FANCA,ERCC2,PAX3,CHD2,TCF4,RBBP8,INPP5K,EHMT1,WWOX,CIC,GTF2H5
GO Process	GO:0019953	Sexual reproduction	14	810	0.67	0.00014	BRIP1,HERC2,ATM,SYNE1,KDM5B,ASPM,PTEN,ATRX,AR,FANCG,FANCA,PAFAH1B1,FANCL,PAFAH1B3
GO Process	GO:0031023	Microtubule organizing center organization	6	92	1.24	0.00014	CDK5RAP2,STIL,CEP152,CENPJ,NDE1,PAFAH1B1
GO Process	GO:0060249	Anatomical structure homeostasis	10	380	0.85	0.00014	PRDX1,NBN,TINF2,ATM,TERT,ATR,SMARCAL1,DNA2,DKC1,RAD50
GO Process	GO:0003006	Developmental process involved in reproduction	15	945	0.63	0.00016	NUP107,BRIP1,HERC2,ATM,BPTF,SYNE1,KDM5B,ASPM,PTEN,ATRX,AR,FANCG,FANCA,PAFAH1B1,PAFAH1B3
GO Process	GO:0006310	DNA recombination	8	219	0.99	0.00016	BRIP1,PALB2,NBN,FANCM,ATM,ATRIP,RAD50,RBBP8
GO Process	GO:0030900	Forebrain development	10	387	0.84	0.00016	DOCK7,ZNF335,MCPH1,NF1,ASPM,STIL,PTEN,ATRX,NDE1,PAFAH1B1
GO Process	GO:0090329	Regulation of dna-dependent dna replication	5	51	1.42	0.00016	NBN,CDT1,ATG7,SMARCAL1,ATRX
GO Process	GO:0140013	Meiotic nuclear division	7	152	2023-09-01	0.00016	BRIP1,FANCM,ATM,BUB1B,ASPM,RAD50,FANCA
GO Process	GO:0051653	Spindle localization	5	52	1.41	0.00017	MCPH1,CDK5RAP2,ASPM,NDE1,PAFAH1B1
GO Process	GO:1903508	Positive regulation of nucleic acid-templated transcription	20	1670	0.51	0.00017	CREBBP,SMARCB1,EP300,ERBB2,ATM,KAT6B,BPTF,TERT,CDK5RAP2,ARID1B,ATRX,AR,ASXL1,CENPJ,BRPF1,ERCC2,PAX3,TCF4,INPP5K,WWOX
GO Process	GO:0010558	Negative regulation of macromolecule biosynthetic process	19	1534	0.52	0.00020	CREBBP,EP300,TINF2,KAT6B,BPTF,MCPH1,ATR,ATG7,SMARCAL1,CENPF,KDM5B,ATRX,AR,CENPJ,RBBP8,INPP5K,EHMT1,WWOX,CIC
GO Process	GO:0045930	Negative regulation of mitotic cell cycle	9	308	0.89	0.00020	EP300,NBN,ATM,BUB1B,CDT1,MCPH1,CENPF,PTEN,ATRX
GO Process	GO:0022616	DNA strand elongation	4	23	1.67	0.00021	NBN,TERT,DNA2,RAD50
GO Process	GO:0032210	Regulation of telomere maintenance via telomerase	5	55	1.39	0.00021	TINF2,ATM,PNKP,ATR,DKC1
GO Process	GO:0000724	Double-strand break repair via homologous recombination	6	102	2023-02-01	0.00022	PALB2,NBN,FANCM,ATM,RAD50,RBBP8
GO Process	GO:1901576	Organic substance biosynthetic process	26	2734	0.41	0.00023	DHPS,BRIP1,CREBBP,SMARCB1,NBN,FANCM,ATM,CDT1,TERT,ATRIP,PNKP,ATR,ATG7,SMARCAL1,DNA2,CENPF,DKC1,PTEN,ATRX,AR,ASXL1,RAD50,ERCC2,RBBP8,INPP5K,GTF2H5
GO Process	GO:0120036	Plasma membrane bounded cell projection organization	16	1122	0.58	0.00024	DOCK7,TUBG1,ERBB2,TUBA1A,ZNF335,TUBB,CDK5RAP2,ARID1B,PCNT,PTEN,CEP152,CENPJ,NDE1,PAFAH1B1,INPP5K,HYLS1
GO Process	GO:0045893	Positive regulation of transcription, dna-templated	19	1587	0.51	0.00031	CREBBP,SMARCB1,EP300,ERBB2,ATM,KAT6B,BPTF,TERT,CDK5RAP2,ARID1B,ATRX,AR,ASXL1,BRPF1,ERCC2,PAX3,TCF4,INPP5K,WWOX
GO Process	GO:0031327	Negative regulation of cellular biosynthetic process	19	1592	0.5	0.00032	CREBBP,EP300,TINF2,KAT6B,BPTF,MCPH1,ATR,ATG7,SMARCAL1,CENPF,KDM5B,ATRX,AR,CENPJ,RBBP8,INPP5K,EHMT1,WWOX,CIC
GO Process	GO:0065003	Protein-containing complex assembly	17	1293	0.55	0.00032	NUP107,TUBG1,CREBBP,SMARCB1,EP300,CENPE,KAT6B,CDT1,TERT,CENPF,ATRX,CENPJ,FANCA,ERCC2,NDE1,TCF4,GTF2H5
GO Process	GO:1904353	Regulation of telomere capping	4	26	1.62	0.00032	NBN,ATM,PNKP,RAD50
GO Process	GO:0048232	Male gamete generation	11	543	0.73	0.00040	BRIP1,HERC2,ATM,SYNE1,ASPM,ATRX,AR,FANCG,FANCA,PAFAH1B1,PAFAH1B3
GO Process	GO:0051704	Multi-organism process	15	1036	0.59	0.00040	NUP107,BRIP1,HERC2,ATM,SYNE1,KDM5B,ASPM,PTEN,ATRX,AR,FANCG,FANCA,PAFAH1B1,FANCL,PAFAH1B3
GO Process	GO:0070200	Establishment of protein localization to telomere	3	7	2023-06-02	0.00040	ATM,TERT,ATR
GO Process	GO:0006261	DNA-dependent DNA replication	6	119	1.13	0.00047	FANCM,CDT1,PNKP,SMARCAL1,DNA2,ATRX
GO Process	GO:0016570	Histone modification	9	351	0.84	0.00048	CREBBP,EP300,ATM,KAT6B,ZNF335,KDM5B,ASXL1,BRPF1,EHMT1
GO Process	GO:0033048	Negative regulation of mitotic sister chromatid segregation	4	30	1.55	0.00049	ATM,BUB1B,CENPF,ATRX
GO Process	GO:0007276	Gamete generation	12	673	0.68	0.00050	BRIP1,HERC2,ATM,SYNE1,ASPM,ATRX,AR,FANCG,FANCA,PAFAH1B1,FANCL,PAFAH1B3
GO Process	GO:0070192	Chromosome organization involved in meiotic cell cycle	5	68	1.29	0.00050	BRIP1,ATM,BUB1B,ATRX,RAD50
GO Process	GO:1904354	Negative regulation of telomere capping	3	8	2.0	0.00051	NBN,ATM,RAD50
GO Process	GO:0007405	Neuroblast proliferation	4	31	1.54	0.00054	DOCK7,ASPM,NDE1,PAFAH1B1
GO Process	GO:0051130	Positive regulation of cellular component organization	16	1209	0.55	0.00054	SMARCB1,EP300,NBN,ATM,CDT1,PNKP,ATR,CDK5RAP2,DKC1,ATRX,AR,RAD50,CENPJ,ERCC2,PAFAH1B1,GTF2H5
GO Process	GO:0071480	Cellular response to gamma radiation	4	31	1.54	0.00054	ATM,ATRIP,ATR,GTF2H5
GO Process	GO:0048609	Multicellular organismal reproductive process	13	807	0.64	0.00057	BRIP1,HERC2,ATM,SYNE1,ASPM,PTEN,ATRX,AR,FANCG,FANCA,PAFAH1B1,FANCL,PAFAH1B3
GO Process	GO:0000132	Establishment of mitotic spindle orientation	4	32	1.53	0.00059	MCPH1,CDK5RAP2,NDE1,PAFAH1B1
GO Process	GO:0031297	Replication fork processing	4	32	1.53	0.00059	FANCM,SMARCAL1,DNA2,ATRX
GO Process	GO:0048854	Brain morphogenesis	4	32	1.53	0.00059	ZNF335,NF1,PTEN,PAFAH1B1
GO Process	GO:0034622	Cellular protein-containing complex assembly	13	816	0.63	0.00062	NUP107,TUBG1,SMARCB1,CENPE,KAT6B,CDT1,CENPF,ATRX,CENPJ,ERCC2,NDE1,TCF4,GTF2H5
GO Process	GO:0009966	Regulation of signal transduction	27	3107	0.37	0.00064	TSC2,BRIP1,CREBBP,PRDX1,SMARCB1,EP300,NBN,ERBB2,ATM,TERT,ATRIP,ATR,NF1,DNA2,ASPM,PTEN,AR,ASXL1,RAD50,CENPJ,BRPF1,FANCA,PAFAH1B1,RBBP8,INPP5K,EHMT1,WWOX
GO Process	GO:0051303	Establishment of chromosome localization	5	73	1.26	0.00064	CENPE,ATM,CDT1,CENPF,NDE1
GO Process	GO:0006303	Double-strand break repair via nonhomologous end joining	5	74	1.26	0.00067	HERC2,NBN,ATM,SMARCAL1,RAD50
GO Process	GO:0043933	Protein-containing complex subunit organization	18	1539	0.5	0.00067	NUP107,TUBG1,CREBBP,SMARCB1,EP300,CENPE,KAT6B,CDT1,BPTF,TERT,CENPF,ATRX,CENPJ,FANCA,ERCC2,NDE1,TCF4,GTF2H5
GO Process	GO:0032212	Positive regulation of telomere maintenance via telomerase	4	34	2023-05-01	0.00070	ATM,PNKP,ATR,DKC1
GO Process	GO:0070482	Response to oxygen levels	9	379	0.8	0.00078	BRIP1,CREBBP,EP300,ATM,TERT,ATG7,NF1,PTEN,ERCC2
GO Process	GO:0001701	In utero embryonic development	9	382	0.8	0.00083	PALB2,NBN,BPTF,ZNF335,STIL,AR,ERCC2,RBBP8,INPP5K
GO Process	GO:0051656	Establishment of organelle localization	9	385	0.8	0.00087	DOCK7,CENPE,ATM,CDT1,MCPH1,CDK5RAP2,CENPF,NDE1,PAFAH1B1
GO Process	GO:1900034	Regulation of cellular response to heat	5	79	1.23	0.00088	NUP107,CREBBP,EP300,ATM,ATR
GO Process	GO:0051253	Negative regulation of rna metabolic process	17	1422	0.51	0.00091	CREBBP,EP300,KAT6B,BPTF,TERT,MCPH1,CENPF,KDM5B,DKC1,ATRX,AR,CENPJ,RBBP8,INPP5K,EHMT1,WWOX,CIC
GO Process	GO:0000077	DNA damage checkpoint	6	140	2023-06-01	0.00097	BRIP1,EP300,NBN,ATM,ATRIP,ATR
GO Process	GO:0007052	Mitotic spindle organization	5	81	1.22	0.00097	TUBG1,CENPE,SMC1A,PCNT,STIL
GO Process	GO:0051716	Cellular response to stimulus	42	6489	0.24	0.00097	TSC2,DOCK7,BRIP1,PALB2,HERC2,CREBBP,PRDX1,SMARCB1,EP300,NBN,FANCM,ERBB2,ATM,KAT6B,TERT,FANCI,ATRIP,SMC1A,PNKP,ATR,ARID1B,ATG7,SMARCAL1,NF1,DNA2,PCNT,KDM5B,STIL,PTEN,ATRX,AR,FANCG,RAD50,CENPJ,FANCA,ERCC2,CHD2,RBBP8,FANCL,INPP5K,WWOX,GTF2H5
GO Process	GO:0032205	Negative regulation of telomere maintenance	4	38	1.45	0.00099	NBN,TINF2,ATM,RAD50
GO Process	GO:0009790	Embryo development	14	1002	0.57	0.0010	TSC2,PALB2,CREBBP,EP300,NBN,ATM,BPTF,ZNF335,NF1,STIL,AR,ERCC2,RBBP8,INPP5K
GO Process	GO:0018205	Peptidyl-lysine modification	8	299	0.86	0.0010	DHPS,NUP107,CREBBP,EP300,KAT6B,ZNF335,BRPF1,EHMT1
GO Process	GO:0044237	Cellular metabolic process	46	7513	0.22	0.0010	DHPS,NUP107,BRIP1,PALB2,HERC2,CREBBP,PRDX1,SMARCB1,EP300,NBN,TINF2,FANCM,ERBB2,ATM,KAT6B,BUB1B,CDT1,TERT,FANCI,ATRIP,SMC1A,PNKP,ZNF335,ATR,ATG7,SMARCAL1,NF1,DNA2,CENPF,KDM5B,DKC1,PTEN,ATRX,AR,ASXL1,FANCG,RAD50,BRPF1,FANCA,ERCC2,PAFAH1B1,RBBP8,FANCL,INPP5K,EHMT1,GTF2H5
GO Process	GO:0009628	Response to abiotic stimulus	15	1147	0.54	0.0011	BRIP1,CREBBP,EP300,ATM,TERT,ATRIP,SMC1A,PNKP,ATR,ATG7,NF1,PTEN,FANCG,ERCC2,GTF2H5
GO Process	GO:0090305	Nucleic acid phosphodiester bond hydrolysis	8	302	0.85	0.0011	FANCM,ATRIP,PNKP,DNA2,RAD50,ERCC2,RBBP8,GTF2H5
GO Process	GO:0072520	Seminiferous tubule development	3	12	1.83	0.0012	BRIP1,ATRX,AR
GO Process	GO:0090656	T-circle formation	3	12	1.83	0.0012	NBN,SMARCAL1,DNA2
GO Process	GO:0010638	Positive regulation of organelle organization	11	633	0.67	0.0013	SMARCB1,NBN,ATM,CDT1,PNKP,ATR,CDK5RAP2,DKC1,ATRX,RAD50,CENPJ
GO Process	GO:0044238	Primary metabolic process	45	7332	0.22	0.0013	DHPS,NUP107,BRIP1,PALB2,HERC2,CREBBP,SMARCB1,EP300,NBN,TINF2,FANCM,ERBB2,ATM,KAT6B,BUB1B,TERT,FANCI,ATRIP,SMC1A,PNKP,ZNF335,ATR,ATG7,SMARCAL1,NF1,DNA2,CENPF,KDM5B,DKC1,PTEN,ATRX,AR,ASXL1,FANCG,RAD50,BRPF1,FANCA,ERCC2,PAFAH1B1,RBBP8,FANCL,INPP5K,EHMT1,PAFAH1B3,GTF2H5
GO Process	GO:2000113	Negative regulation of cellular macromolecule biosynthetic process	17	1470	0.49	0.0013	CREBBP,EP300,TINF2,KAT6B,BPTF,MCPH1,ATR,ATG7,SMARCAL1,CENPF,KDM5B,ATRX,AR,INPP5K,EHMT1,WWOX,CIC
GO Process	GO:0000212	Meiotic spindle organization	3	13	1.79	0.0014	TUBG1,ASPM,ATRX
GO Process	GO:0006807	Nitrogen compound metabolic process	43	6852	0.23	0.0014	DHPS,NUP107,BRIP1,PALB2,HERC2,CREBBP,SMARCB1,EP300,NBN,TINF2,FANCM,ERBB2,ATM,KAT6B,BUB1B,TERT,FANCI,ATRIP,SMC1A,PNKP,ZNF335,ATR,ATG7,SMARCAL1,NF1,DNA2,CENPF,KDM5B,DKC1,PTEN,ATRX,AR,ASXL1,FANCG,RAD50,BRPF1,FANCA,ERCC2,PAFAH1B1,RBBP8,FANCL,EHMT1,GTF2H5
GO Process	GO:0090399	Replicative senescence	3	13	1.79	0.0014	ATM,TERT,ATR
GO Process	GO:1902531	Regulation of intracellular signal transduction	19	1807	0.45	0.0014	TSC2,BRIP1,PRDX1,EP300,NBN,ERBB2,ATM,ATRIP,ATR,NF1,DNA2,PTEN,AR,RAD50,BRPF1,PAFAH1B1,RBBP8,INPP5K,EHMT1
GO Process	GO:0048583	Regulation of response to stimulus	31	4114	0.31	0.0016	TSC2,NUP107,BRIP1,CREBBP,PRDX1,SMARCB1,EP300,NBN,ERBB2,ATM,TERT,ATRIP,PNKP,MCPH1,ATR,ATG7,NF1,DNA2,ASPM,PTEN,AR,ASXL1,RAD50,CENPJ,BRPF1,FANCA,PAFAH1B1,RBBP8,INPP5K,EHMT1,WWOX
GO Process	GO:0010646	Regulation of cell communication	28	3514	0.33	0.0017	TSC2,BRIP1,CREBBP,PRDX1,SMARCB1,EP300,NBN,ERBB2,ATM,TERT,ATRIP,ATR,NF1,DNA2,KDM5B,ASPM,PTEN,AR,ASXL1,RAD50,CENPJ,BRPF1,FANCA,PAFAH1B1,RBBP8,INPP5K,EHMT1,WWOX
GO Process	GO:0023051	Regulation of signaling	28	3553	0.32	0.0021	TSC2,BRIP1,CREBBP,PRDX1,SMARCB1,EP300,NBN,ERBB2,ATM,TERT,ATRIP,ATR,NF1,DNA2,KDM5B,ASPM,PTEN,AR,ASXL1,RAD50,CENPJ,BRPF1,FANCA,PAFAH1B1,RBBP8,INPP5K,EHMT1,WWOX
GO Process	GO:0001666	Response to hypoxia	8	342	0.8	0.0023	BRIP1,CREBBP,EP300,ATM,TERT,NF1,PTEN,ERCC2
GO Process	GO:0071897	DNA biosynthetic process	5	101	2023-12-01	0.0023	TERT,ATRIP,CENPF,DKC1,RAD50
GO Process	GO:0071478	Cellular response to radiation	6	170	0.98	0.0024	CREBBP,EP300,ATM,ATRIP,ATR,GTF2H5
GO Process	GO:0071704	Organic substance metabolic process	46	7755	0.2	0.0024	DHPS,NUP107,BRIP1,PALB2,HERC2,CREBBP,SMARCB1,EP300,NBN,TINF2,FANCM,ERBB2,ATM,KAT6B,BUB1B,CDT1,TERT,FANCI,ATRIP,SMC1A,PNKP,ZNF335,ATR,ATG7,SMARCAL1,NF1,DNA2,CENPF,KDM5B,DKC1,PTEN,ATRX,AR,ASXL1,FANCG,RAD50,BRPF1,FANCA,ERCC2,PAFAH1B1,RBBP8,FANCL,INPP5K,EHMT1,PAFAH1B3,GTF2H5
GO Process	GO:0008152	Metabolic process	48	8298	0.19	0.0025	DHPS,NUP107,BRIP1,PALB2,HERC2,CREBBP,PRDX1,SMARCB1,EP300,NBN,TINF2,FANCM,ERBB2,ATM,KAT6B,BUB1B,CDT1,TERT,FANCI,ATRIP,SMC1A,PNKP,ZNF335,ATR,ATG7,SMARCAL1,NF1,DNA2,CENPF,KDM5B,DKC1,PTEN,ATRX,AR,ASXL1,FANCG,RAD50,BRPF1,FANCA,ERCC2,PAFAH1B1,RBBP8,FANCL,INPP5K,EHMT1,PAFAH1B3,WWOX,GTF2H5
GO Process	GO:0021543	Pallium development	6	171	0.97	0.0025	MCPH1,NF1,ASPM,PTEN,NDE1,PAFAH1B1
GO Process	GO:0050896	Response to stimulus	47	8046	0.19	0.0026	TSC2,DOCK7,BRIP1,PALB2,HERC2,CREBBP,PRDX1,SMARCB1,EP300,NBN,FANCM,ERBB2,ATM,KAT6B,CDT1,TERT,FANCI,ATRIP,SMC1A,PNKP,TUBB,ATR,ARID1B,ATG7,SMARCAL1,NF1,DNA2,PCNT,CENPF,KDM5B,STIL,PTEN,ATRX,AR,ASXL1,FANCG,RAD50,CENPJ,FANCA,ERCC2,CHD2,RBBP8,FANCL,INPP5K,EHMT1,WWOX,GTF2H5
GO Process	GO:0007131	Reciprocal meiotic recombination	4	53	1.31	0.0029	BRIP1,FANCM,ATM,RAD50
GO Process	GO:0009887	Animal organ morphogenesis	13	967	0.56	0.0029	PALB2,EP300,ATRIP,ZNF335,NF1,KDM5B,STIL,PTEN,AR,ASXL1,PAX3,PAFAH1B1,WWOX
GO Process	GO:0042770	Signal transduction in response to dna damage	5	107	2023-01-01	0.0029	EP300,NBN,ATM,ATRIP,ATRX
GO Process	GO:0065008	Regulation of biological quality	30	4042	0.3	0.0029	DOCK7,CREBBP,PRDX1,SMARCB1,EP300,NBN,TINF2,ATM,TUBA1A,TERT,ATRIP,PNKP,TUBB,ATR,SMARCAL1,NF1,DNA2,SYNE1,KDM5B,ASPM,DKC1,PTEN,ATRX,AR,ASXL1,RAD50,ERCC2,PAFAH1B1,INPP5K,EHMT1
GO Process	GO:0065009	Regulation of molecular function	34	4913	0.27	0.0029	TSC2,DOCK7,HERC2,CREBBP,SMARCB1,EP300,CENPE,NBN,ERBB2,CDT1,TERT,ATRIP,PNKP,ZNF335,MCPH1,ARID1B,NF1,KDM5B,DKC1,PTEN,AR,ASXL1,RAD50,CENPJ,FANCA,ERCC2,PAX3,NDE1,PAFAH1B1,TCF4,RBBP8,INPP5K,WWOX,CIC
GO Process	GO:0007099	Centriole replication	3	18	1.65	0.0030	CDK5RAP2,CEP152,CENPJ
GO Process	GO:0051383	Kinetochore organization	3	18	1.65	0.0030	CENPE,CDT1,CENPF
GO Process	GO:0006289	Nucleotide-excision repair	5	111	2023-08-01	0.0034	BRIP1,EP300,PNKP,ERCC2,GTF2H5
GO Process	GO:0034654	Nucleobase-containing compound biosynthetic process	13	995	0.54	0.0036	CREBBP,SMARCB1,TERT,ATRIP,PNKP,CENPF,DKC1,PTEN,AR,ASXL1,RAD50,ERCC2,GTF2H5
GO Process	GO:0007568	Aging	7	274	0.84	0.0038	ATM,TERT,ATRIP,ATR,ATG7,PTEN,ERCC2
GO Process	GO:0071932	Replication fork reversal	2	2	2.43	0.0038	FANCM,DNA2
GO Process	GO:0097694	Establishment of rna localization to telomere	2	2	2.43	0.0038	ATM,ATR
GO Process	GO:0097695	Establishment of protein-containing complex localization to telomere	2	2	2.43	0.0038	ATM,ATR
GO Process	GO:1904884	Positive regulation of telomerase catalytic core complex assembly	2	2	2.43	0.0038	ATM,ATR
GO Process	GO:0042325	Regulation of phosphorylation	17	1626	0.45	0.0039	TSC2,NUP107,DOCK7,PRDX1,EP300,CENPE,NBN,ERBB2,ATM,ATRIP,MCPH1,NF1,PTEN,AR,RAD50,PAFAH1B1,INPP5K
GO Process	GO:0021987	Cerebral cortex development	5	116	2023-06-01	0.0040	MCPH1,NF1,ASPM,NDE1,PAFAH1B1
GO Process	GO:0010628	Positive regulation of gene expression	21	2337	0.38	0.0041	CREBBP,SMARCB1,EP300,ERBB2,ATM,KAT6B,BPTF,TERT,CDK5RAP2,ARID1B,KDM5B,PTEN,ATRX,AR,ASXL1,BRPF1,ERCC2,PAX3,TCF4,INPP5K,WWOX
GO Process	GO:0046605	Regulation of centrosome cycle	4	60	1.25	0.0042	MCPH1,CDK5RAP2,STIL,CENPJ
GO Process	GO:0080135	Regulation of cellular response to stress	11	739	0.6	0.0043	NUP107,CREBBP,PRDX1,EP300,ATM,TERT,PNKP,ATR,ATG7,PTEN,PAFAH1B1
GO Process	GO:0009653	Anatomical structure morphogenesis	20	2165	0.39	0.0044	TSC2,DOCK7,PALB2,CREBBP,EP300,ERBB2,ATM,ATRIP,ZNF335,NF1,KDM5B,STIL,PTEN,ATRX,AR,ASXL1,ERCC2,PAX3,PAFAH1B1,WWOX
GO Process	GO:1903507	Negative regulation of nucleic acid-templated transcription	15	1324	0.48	0.0045	CREBBP,EP300,KAT6B,BPTF,MCPH1,CENPF,KDM5B,ATRX,AR,CENPJ,RBBP8,INPP5K,EHMT1,WWOX,CIC
GO Process	GO:0007004	Telomere maintenance via telomerase	3	22	1.56	0.0047	TERT,DKC1,RAD50
GO Process	GO:0030010	Establishment of cell polarity	5	122	2023-04-01	0.0049	DOCK7,MCPH1,CDK5RAP2,NDE1,PAFAH1B1
GO Process	GO:0072331	Signal transduction by p53 class mediator	5	123	2023-04-01	0.0050	EP300,NBN,ATM,ATRX,WWOX
GO Process	GO:0048869	Cellular developmental process	28	3757	0.3	0.0051	DOCK7,BRIP1,EP300,ERBB2,ATM,TERT,ATRIP,ZNF335,ATR,CDK5RAP2,ARID1B,NF1,CENPF,SYNE1,KDM5B,ASPM,PTEN,ATRX,AR,ASXL1,FANCG,CEP152,ERCC2,CHD2,NDE1,PAFAH1B1,TCF4,WWOX
GO Process	GO:0007020	Microtubule nucleation	3	23	1.54	0.0052	TUBG1,CENPJ,NDE1
GO Process	GO:0007094	Mitotic spindle assembly checkpoint	3	23	1.54	0.0052	ATM,BUB1B,CENPF
GO Process	GO:0046599	Regulation of centriole replication	3	23	1.54	0.0052	CDK5RAP2,STIL,CENPJ
GO Process	GO:0010836	Negative regulation of protein adp-ribosylation	2	3	2.25	0.0058	TINF2,PNKP
GO Process	GO:0018076	N-terminal peptidyl-lysine acetylation	2	3	2.25	0.0058	CREBBP,EP300
GO Process	GO:0007507	Heart development	9	522	0.66	0.0063	TSC2,EP300,ERBB2,ATM,ATRIP,NF1,STIL,PTEN,ASXL1
GO Process	GO:0072091	Regulation of stem cell proliferation	4	68	2023-02-01	0.0063	TERT,ZNF335,NF1,ASPM
GO Process	GO:0007283	Spermatogenesis	9	525	0.66	0.0065	BRIP1,HERC2,SYNE1,ASPM,ATRX,AR,FANCG,PAFAH1B1,PAFAH1B3
GO Process	GO:0000819	Sister chromatid segregation	5	133	1.0	0.0067	TUBG1,CENPE,BUB1B,CDT1,SMC1A
GO Process	GO:0008584	Male gonad development	5	133	1.0	0.0067	BRIP1,ASPM,ATRX,AR,FANCA
GO Process	GO:0006352	DNA-templated transcription, initiation	6	214	0.88	0.0069	CREBBP,SMARCB1,PTEN,AR,ERCC2,GTF2H5
GO Process	GO:0071453	Cellular response to oxygen levels	6	216	0.87	0.0071	BRIP1,CREBBP,EP300,TERT,ATG7,PTEN
GO Process	GO:0071214	Cellular response to abiotic stimulus	7	313	0.78	0.0075	CREBBP,EP300,ATM,ATRIP,ATR,PTEN,GTF2H5
GO Process	GO:1901991	Negative regulation of mitotic cell cycle phase transition	6	219	0.87	0.0076	EP300,NBN,ATM,BUB1B,CENPF,PTEN
GO Process	GO:0001655	Urogenital system development	7	315	0.77	0.0077	NUP107,ATRIP,NF1,CENPF,PTEN,AR,ASXL1
GO Process	GO:0031860	Telomeric 3 overhang formation	2	4	2.13	0.0080	NBN,RAD50
GO Process	GO:0043412	Macromolecule modification	25	3277	0.31	0.0088	DHPS,NUP107,HERC2,CREBBP,EP300,ERBB2,ATM,KAT6B,BUB1B,ATRIP,ZNF335,ATR,ATG7,NF1,KDM5B,DKC1,PTEN,ATRX,AR,ASXL1,BRPF1,ERCC2,FANCL,EHMT1,GTF2H5
GO Process	GO:0060429	Epithelium development	13	1109	0.5	0.0089	TSC2,PALB2,EP300,ATM,NF1,KDM5B,STIL,ATRX,AR,ASXL1,CEP152,ERCC2,PAFAH1B1
GO Process	GO:1904837	beta-catenin-TCF complex assembly	3	29	1.44	0.0089	CREBBP,EP300,TERT
GO Process	GO:0009411	Response to uv	5	144	0.97	0.0091	CREBBP,EP300,ATRIP,ATR,ERCC2
GO Process	GO:0030154	Cell differentiation	27	3702	0.29	0.0092	DOCK7,BRIP1,EP300,ERBB2,ATM,TERT,ATRIP,ZNF335,CDK5RAP2,ARID1B,NF1,CENPF,SYNE1,KDM5B,ASPM,PTEN,ATRX,AR,ASXL1,FANCG,CEP152,ERCC2,CHD2,NDE1,PAFAH1B1,TCF4,WWOX
GO Process	GO:0051642	Centrosome localization	3	30	1.43	0.0096	ASPM,NDE1,PAFAH1B1
GO Process	GO:0048468	Cell development	16	1629	0.42	0.0111	DOCK7,BRIP1,EP300,ERBB2,ATM,ZNF335,ARID1B,NF1,ASPM,PTEN,ATRX,AR,ASXL1,FANCG,ERCC2,PAFAH1B1
GO Process	GO:0016233	Telomere capping	3	32	2023-04-01	0.0113	NBN,TINF2,RAD50
GO Process	GO:0030330	DNA damage response, signal transduction by p53 class mediator	4	82	2023-12-01	0.0113	EP300,NBN,ATM,ATRX
GO Process	GO:1902692	Regulation of neuroblast proliferation	3	32	2023-04-01	0.0113	ZNF335,NF1,ASPM
GO Process	GO:0034644	Cellular response to uv	4	83	2023-11-01	0.0117	CREBBP,EP300,ATRIP,ATR
GO Process	GO:0035295	Tube development	11	851	0.54	0.0120	TSC2,BRIP1,EP300,NF1,KDM5B,STIL,PTEN,ATRX,AR,ASXL1,CIC
GO Process	GO:0007093	Mitotic cell cycle checkpoint	5	156	0.93	0.0124	EP300,NBN,ATM,BUB1B,CENPF
GO Process	GO:0140014	Mitotic nuclear division	5	156	0.93	0.0124	TUBG1,CENPE,CDT1,SMC1A,NDE1
GO Process	GO:0032886	Regulation of microtubule-based process	6	245	0.82	0.0126	ERBB2,MCPH1,CDK5RAP2,STIL,CENPJ,PAFAH1B1
GO Process	GO:0008156	Negative regulation of dna replication	3	34	1.37	0.0129	ATR,ATG7,SMARCAL1
GO Process	GO:0009791	Post-embryonic development	4	86	2023-01-01	0.0129	ATM,KDM5B,ATRX,ERCC2
GO Process	GO:0045132	Meiotic chromosome segregation	4	87	2023-09-01	0.0134	BRIP1,FANCM,ATM,BUB1B
GO Process	GO:0031334	Positive regulation of protein-containing complex assembly	6	249	0.81	0.0135	ATM,CDT1,ATR,CDK5RAP2,ERCC2,GTF2H5
GO Process	GO:0000019	Regulation of mitotic recombination	2	6	1.95	0.0137	RAD50,ERCC2
GO Process	GO:0017145	Stem cell division	3	35	1.36	0.0137	DOCK7,ASPM,PAFAH1B1
GO Process	GO:0018193	Peptidyl-amino acid modification	11	867	0.53	0.0137	DHPS,NUP107,CREBBP,EP300,ERBB2,ATM,KAT6B,ZNF335,ATR,BRPF1,EHMT1
GO Process	GO:0051661	Maintenance of centrosome location	2	6	1.95	0.0137	ASPM,PAFAH1B1
GO Process	GO:0060992	Response to fungicide	2	6	1.95	0.0137	KDM5B,EHMT1
GO Process	GO:2001236	Regulation of extrinsic apoptotic signaling pathway	5	161	0.92	0.0137	TERT,NF1,PTEN,AR,WWOX
GO Process	GO:0006367	Transcription initiation from rna polymerase ii promoter	5	162	0.92	0.0141	CREBBP,PTEN,AR,ERCC2,GTF2H5
GO Process	GO:0014065	Phosphatidylinositol 3-kinase signaling	3	36	1.35	0.0146	ERBB2,NF1,PTEN
GO Process	GO:0008585	Female gonad development	4	91	2023-07-01	0.0154	NUP107,ATM,FANCG,FANCA
GO Process	GO:0006361	Transcription initiation from rna polymerase i promoter	3	37	1.34	0.0156	SMARCB1,ERCC2,GTF2H5
GO Process	GO:0033365	Protein localization to organelle	10	743	0.56	0.0159	TSC2,NUP107,TINF2,ATM,TERT,MCPH1,ATR,SYNE1,STIL,ATRX
GO Process	GO:0030174	Regulation of dna-dependent dna replication initiation	2	7	1.88	0.0169	NBN,CDT1
GO Process	GO:0048820	Hair follicle maturation	2	7	1.88	0.0169	NF1,ERCC2
GO Process	GO:0008283	Cell population proliferation	8	493	0.64	0.0185	DOCK7,PALB2,PRDX1,NBN,ASPM,ERCC2,NDE1,PAFAH1B1
GO Process	GO:0045740	Positive regulation of dna replication	3	40	2023-03-01	0.0189	CDT1,DNA2,ATRX
GO Process	GO:0051817	Modulation of process of other organism involved in symbiotic interaction	4	97	2023-04-01	0.0189	SMARCB1,EP300,ATG7,INPP5K
GO Process	GO:0006915	Apoptotic process	11	918	0.51	0.0207	TSC2,EP300,NBN,ATM,BUB1B,NF1,PTEN,ERCC2,PAX3,KLLN,WWOX
GO Process	GO:0007270	Neuron-neuron synaptic transmission	2	8	1.83	0.0207	ARID1B,PTEN
GO Process	GO:0045787	Positive regulation of cell cycle	7	388	0.68	0.0224	EP300,ATM,CDT1,TERT,ATRX,CENPJ,PAFAH1B1
GO Process	GO:2000648	Positive regulation of stem cell proliferation	3	43	1.27	0.0227	TERT,ZNF335,ASPM
GO Process	GO:0045944	Positive regulation of transcription by rna polymerase ii	13	1253	0.44	0.0243	CREBBP,SMARCB1,EP300,ATM,KAT6B,BPTF,TERT,ATRX,AR,ASXL1,PAX3,TCF4,WWOX
GO Process	GO:0016573	Histone acetylation	4	105	2023-01-01	0.0246	CREBBP,EP300,KAT6B,BRPF1
GO Process	GO:0050768	Negative regulation of neurogenesis	6	287	0.75	0.0259	TERT,CDK5RAP2,NF1,ASPM,PTEN,PAFAH1B1
GO Process	GO:0071456	Cellular response to hypoxia	5	189	0.85	0.0261	BRIP1,CREBBP,EP300,TERT,PTEN
GO Process	GO:0000070	Mitotic sister chromatid segregation	4	108	1.0	0.0268	TUBG1,CENPE,CDT1,SMC1A
GO Process	GO:0051898	Negative regulation of protein kinase b signaling	3	46	1.24	0.0268	TSC2,PTEN,INPP5K
GO Process	GO:0080134	Regulation of response to stress	14	1437	0.42	0.0268	NUP107,CREBBP,PRDX1,EP300,ATM,TERT,ATRIP,PNKP,MCPH1,ATR,ATG7,PTEN,FANCA,PAFAH1B1
GO Process	GO:0045892	Negative regulation of transcription, dna-templated	13	1273	0.44	0.0275	CREBBP,EP300,KAT6B,BPTF,MCPH1,CENPF,KDM5B,ATRX,AR,INPP5K,EHMT1,WWOX,CIC
GO Process	GO:0070507	Regulation of microtubule cytoskeleton organization	5	192	0.84	0.0275	MCPH1,CDK5RAP2,STIL,CENPJ,PAFAH1B1
GO Process	GO:0090068	Positive regulation of cell cycle process	6	294	0.74	0.0286	EP300,ATM,CDT1,TERT,ATRX,CENPJ
GO Process	GO:0042552	Myelination	4	111	0.98	0.0291	ERBB2,NF1,PTEN,ERCC2
GO Process	GO:2001239	Regulation of extrinsic apoptotic signaling pathway in absence of ligand	3	48	1.22	0.0294	TERT,NF1,WWOX
GO Process	GO:0044087	Regulation of cellular component biogenesis	11	971	0.48	0.0307	EP300,ATM,CDT1,ATR,CDK5RAP2,STIL,PTEN,CENPJ,ERCC2,INPP5K,GTF2H5
GO Process	GO:0042127	Regulation of cell population proliferation	15	1642	0.39	0.0313	DHPS,TSC2,BRIP1,TINF2,ERBB2,ATM,TERT,ZNF335,NF1,KDM5B,ASPM,PTEN,AR,FANCA,FANCL
GO Process	GO:0009416	Response to light stimulus	6	302	0.73	0.0316	CREBBP,EP300,ATRIP,ATR,NF1,ERCC2
GO Process	GO:0048853	Forebrain morphogenesis	2	11	1.69	0.0325	NF1,PTEN
GO Process	GO:0050767	Regulation of neurogenesis	10	828	0.51	0.0325	DOCK7,EP300,TERT,ZNF335,CDK5RAP2,NF1,ASPM,PTEN,PAFAH1B1,TCF4
GO Process	GO:0051315	Attachment of mitotic spindle microtubules to kinetochore	2	11	1.69	0.0325	CENPE,CDT1
GO Process	GO:2001241	Positive regulation of extrinsic apoptotic signaling pathway in absence of ligand	2	11	1.69	0.0325	NF1,WWOX
GO Process	GO:0009967	Positive regulation of signal transduction	15	1654	0.39	0.0330	CREBBP,SMARCB1,EP300,ERBB2,ATM,TERT,ATR,NF1,ASPM,PTEN,AR,ASXL1,CENPJ,PAFAH1B1,WWOX
GO Process	GO:2001238	Positive regulation of extrinsic apoptotic signaling pathway	3	51	2023-02-01	0.0331	NF1,PTEN,WWOX
GO Process	GO:0044093	Positive regulation of molecular function	16	1842	0.37	0.0343	TSC2,DOCK7,SMARCB1,EP300,CENPE,NBN,ERBB2,CDT1,TERT,PNKP,NF1,DKC1,PTEN,AR,RAD50,ERCC2
GO Process	GO:0006338	Chromatin remodeling	5	206	0.81	0.0349	SMARCB1,BPTF,ARID1B,KDM5B,ATRX
GO Process	GO:0008285	Negative regulation of cell population proliferation	9	696	0.54	0.0361	TSC2,BRIP1,TINF2,ERBB2,ATM,TERT,NF1,PTEN,AR
GO Process	GO:0060736	Prostate gland growth	2	12	1.65	0.0369	PTEN,AR
GO Process	GO:1900112	Regulation of histone h3-k9 trimethylation	2	12	1.65	0.0369	SMARCB1,ATRX
GO Process	GO:2000105	Positive regulation of dna-dependent dna replication	2	12	1.65	0.0369	CDT1,ATRX
GO Process	GO:0051310	Metaphase plate congression	3	54	1.17	0.0379	CENPE,CDT1,CENPF
GO Process	GO:0097659	Nucleic acid-templated transcription	8	568	0.58	0.0398	CREBBP,SMARCB1,TERT,PTEN,AR,ASXL1,ERCC2,GTF2H5
GO Process	GO:1903827	Regulation of cellular protein localization	8	568	0.58	0.0398	ERBB2,CDT1,TERT,NF1,PCNT,DKC1,AR,INPP5K
GO Process	GO:0051382	Kinetochore assembly	2	13	1.62	0.0418	CENPE,CENPF
GO Process	GO:0072711	Cellular response to hydroxyurea	2	13	1.62	0.0418	ATRIP,ATRX
GO Process	GO:2000574	Regulation of microtubule motor activity	2	13	1.62	0.0418	NDE1,PAFAH1B1
GO Process	GO:0044271	Cellular nitrogen compound biosynthetic process	14	1522	0.39	0.0419	DHPS,CREBBP,SMARCB1,TERT,ATRIP,PNKP,CENPF,DKC1,PTEN,AR,ASXL1,RAD50,ERCC2,GTF2H5
GO Process	GO:0006464	Cellular protein modification process	22	3063	0.28	0.0421	DHPS,NUP107,HERC2,CREBBP,EP300,ERBB2,ATM,KAT6B,BUB1B,ZNF335,ATR,ATG7,NF1,KDM5B,PTEN,AR,ASXL1,BRPF1,ERCC2,FANCL,EHMT1,GTF2H5
GO Process	GO:0044403	Symbiotic process	10	865	0.49	0.0423	TSC2,NUP107,CREBBP,SMARCB1,EP300,NBN,ATG7,RAD50,ERCC2,INPP5K
GO Process	GO:0002377	Immunoglobulin production	3	57	1.15	0.0429	NBN,ATM,ATRIP
GO Process	GO:0043254	Regulation of protein-containing complex assembly	7	451	0.62	0.0457	EP300,ATM,CDT1,ATR,CDK5RAP2,ERCC2,GTF2H5
GO Process	GO:0014067	Negative regulation of phosphatidylinositol 3-kinase signaling	2	14	1.58	0.0464	TSC2,PTEN
GO Process	GO:0090266	Regulation of mitotic cell cycle spindle assembly checkpoint	2	14	1.58	0.0464	CDT1,CDK5RAP2
GO Process	GO:0050680	Negative regulation of epithelial cell proliferation	4	131	0.91	0.0465	TINF2,NF1,PTEN,AR
GO Process	GO:0051338	Regulation of transferase activity	11	1036	0.45	0.0465	TSC2,CENPE,NBN,ERBB2,PNKP,MCPH1,NF1,DKC1,PTEN,RAD50,INPP5K
GO Process	GO:2000026	Regulation of multicellular organismal development	17	2096	0.34	0.0465	DOCK7,CREBBP,EP300,ERBB2,TERT,ZNF335,CDK5RAP2,NF1,CENPF,KDM5B,ASPM,PTEN,AR,FANCA,PAFAH1B1,TCF4,EHMT1
GO Process	GO:0048699	Generation of neurons	14	1551	0.38	0.0480	DOCK7,EP300,ERBB2,TERT,ZNF335,CDK5RAP2,ARID1B,NF1,ASPM,PTEN,ERCC2,NDE1,PAFAH1B1,TCF4
GO Process	GO:0061515	Myeloid cell development	3	60	1.13	0.0480	EP300,ERCC2,PAFAH1B1
GO Molecular Function
GO Function	GO:0003677	DNA binding	35	2470	0.58	7.63e-10	BRIP1,PALB2,CREBBP,SMARCB1,EP300,NBN,TINF2,FANCM,ATM,KAT6B,CDT1,BPTF,TERT,FANCI,ATRIP,PNKP,ZNF335,ATR,CDK5RAP2,ARID1B,DNA2,KDM5B,ATRX,AR,ASXL1,FANCG,RAD50,BRPF1,ERCC2,PAX3,CHD2,TCF4,RBBP8,KLLN,CIC
GO Function	GO:0003676	Nucleic acid binding	40	3947	0.43	1.30e-07	BRIP1,PALB2,CREBBP,PRDX1,SMARCB1,EP300,NBN,TINF2,FANCM,ATM,KAT6B,CDT1,BPTF,TERT,FANCI,ATRIP,SMC1A,PNKP,ZNF335,ATR,CDK5RAP2,ARID1B,SMARCAL1,DNA2,SYNE1,KDM5B,DKC1,ATRX,AR,ASXL1,FANCG,RAD50,BRPF1,ERCC2,PAX3,CHD2,TCF4,RBBP8,KLLN,CIC
GO Function	GO:0140097	Catalytic activity, acting on dna	11	184	2023-02-01	1.57e-07	BRIP1,FANCM,TERT,ATRIP,SMARCAL1,DNA2,DKC1,ATRX,ERCC2,CHD2,RBBP8
GO Function	GO:1901363	Heterocyclic compound binding	46	5831	0.33	3.96e-06	TUBG1,BRIP1,PALB2,CREBBP,PRDX1,SMARCB1,EP300,CENPE,NBN,TINF2,FANCM,ERBB2,ATM,KAT6B,BUB1B,CDT1,TUBA1A,BPTF,TERT,FANCI,ATRIP,SMC1A,PNKP,ZNF335,TUBB,ATR,CDK5RAP2,ARID1B,SMARCAL1,DNA2,SYNE1,KDM5B,DKC1,ATRX,AR,ASXL1,FANCG,RAD50,BRPF1,ERCC2,PAX3,CHD2,TCF4,RBBP8,KLLN,CIC
GO Function	GO:0003678	DNA helicase activity	7	63	1.47	4.70e-06	BRIP1,FANCM,SMARCAL1,DNA2,ATRX,ERCC2,CHD2
GO Function	GO:0003684	Damaged dna binding	7	64	1.47	4.70e-06	CREBBP,EP300,NBN,PNKP,FANCG,ERCC2,RBBP8
GO Function	GO:0097159	Organic cyclic compound binding	46	5916	0.32	4.70e-06	TUBG1,BRIP1,PALB2,CREBBP,PRDX1,SMARCB1,EP300,CENPE,NBN,TINF2,FANCM,ERBB2,ATM,KAT6B,BUB1B,CDT1,TUBA1A,BPTF,TERT,FANCI,ATRIP,SMC1A,PNKP,ZNF335,TUBB,ATR,CDK5RAP2,ARID1B,SMARCAL1,DNA2,SYNE1,KDM5B,DKC1,ATRX,AR,ASXL1,FANCG,RAD50,BRPF1,ERCC2,PAX3,CHD2,TCF4,RBBP8,KLLN,CIC
GO Function	GO:0005515	Protein binding	50	7026	0.28	6.77e-06	DHPS,TSC2,DOCK7,TUBG1,HERC2,CREBBP,PRDX1,SMARCB1,EP300,CENPE,NBN,ERBB2,ATM,KAT6B,CDT1,TUBA1A,BPTF,TERT,FANCI,ATRIP,SMC1A,TUBB,MCPH1,CDK5RAP2,ATG7,PCNT,CENPF,SYNE1,KDM5B,ASPM,STIL,PTEN,ATRX,AR,ASXL1,RAD50,CEP152,CENPJ,ERCC2,PAX3,CHD2,NDE1,PAFAH1B1,TCF4,RBBP8,FANCL,EHMT1,PAFAH1B3,WWOX,KIZ
GO Function	GO:0005488	Binding	67	12516	0.16	1.65e-05	DHPS,TSC2,DOCK7,TUBG1,BRIP1,PALB2,HERC2,CREBBP,PRDX1,SMARCB1,EP300,CENPE,NBN,TINF2,FANCM,ERBB2,ATM,KAT6B,BUB1B,CDT1,TUBA1A,BPTF,TERT,FANCI,ATRIP,SMC1A,PNKP,ZNF335,TUBB,MCPH1,ATR,CDK5RAP2,ARID1B,ATG7,SMARCAL1,NF1,DNA2,PCNT,CENPF,SYNE1,KDM5B,ASPM,DKC1,STIL,PTEN,ATRX,AR,ASXL1,FANCG,RAD50,CEP152,CENPJ,BRPF1,ERCC2,PAX3,CHD2,NDE1,PAFAH1B1,TCF4,RBBP8,FANCL,KLLN,EHMT1,PAFAH1B3,WWOX,CIC,KIZ
GO Function	GO:0042802	Identical protein binding	22	1896	0.49	0.00029	DHPS,TSC2,TUBG1,PRDX1,ERBB2,ATM,TUBA1A,TERT,ATRIP,MCPH1,ATG7,CENPF,SYNE1,STIL,PTEN,RAD50,CENPJ,NDE1,PAFAH1B1,TCF4,RBBP8,PAFAH1B3
GO Function	GO:0008134	Transcription factor binding	13	672	0.71	0.00034	CREBBP,SMARCB1,EP300,NBN,KAT6B,BPTF,TERT,ATG7,CENPF,AR,ASXL1,TCF4,RBBP8
GO Function	GO:0003682	Chromatin binding	11	570	0.71	0.0022	BRIP1,CREBBP,EP300,FANCM,CDT1,SMC1A,CENPF,ATRX,AR,ASXL1,CIC
GO Function	GO:0016887	ATPase activity	9	393	0.79	0.0038	BRIP1,CENPE,FANCM,SMARCAL1,DNA2,ATRX,RAD50,ERCC2,CHD2
GO Function	GO:0017111	Nucleoside-triphosphatase activity	12	760	0.63	0.0051	TUBG1,BRIP1,CENPE,FANCM,TUBA1A,TUBB,SMARCAL1,DNA2,ATRX,RAD50,ERCC2,CHD2
GO Function	GO:0017076	Purine nucleotide binding	19	1878	0.43	0.0087	TUBG1,BRIP1,CENPE,FANCM,ERBB2,ATM,BUB1B,TUBA1A,ATRIP,SMC1A,PNKP,TUBB,ATR,SMARCAL1,DNA2,ATRX,RAD50,ERCC2,CHD2
GO Function	GO:0003690	Double-stranded dna binding	14	1156	0.51	0.0136	CREBBP,SMARCB1,EP300,BPTF,ATRIP,PNKP,ZNF335,CDK5RAP2,KDM5B,AR,RAD50,CHD2,TCF4,RBBP8
GO Function	GO:0035639	Purine ribonucleoside triphosphate binding	18	1799	0.43	0.0136	TUBG1,BRIP1,CENPE,FANCM,ERBB2,ATM,BUB1B,TUBA1A,SMC1A,PNKP,TUBB,ATR,SMARCAL1,DNA2,ATRX,RAD50,ERCC2,CHD2
GO Function	GO:0008022	Protein c-terminus binding	6	199	0.91	0.0161	EP300,ERBB2,TERT,CENPF,ERCC2,TCF4
GO Function	GO:0002039	p53 binding	4	69	1.19	0.0186	CREBBP,SMARCB1,EP300,EHMT1
GO Function	GO:0030554	Adenyl nucleotide binding	16	1534	0.45	0.0186	BRIP1,CENPE,FANCM,ERBB2,ATM,BUB1B,ATRIP,SMC1A,PNKP,ATR,SMARCAL1,DNA2,ATRX,RAD50,ERCC2,CHD2
GO Function	GO:0032555	Purine ribonucleotide binding	18	1864	0.41	0.0186	TUBG1,BRIP1,CENPE,FANCM,ERBB2,ATM,BUB1B,TUBA1A,SMC1A,PNKP,TUBB,ATR,SMARCAL1,DNA2,ATRX,RAD50,ERCC2,CHD2
GO Function	GO:0097367	Carbohydrate derivative binding	20	2226	0.38	0.0186	TUBG1,BRIP1,CENPE,FANCM,ERBB2,ATM,BUB1B,TUBA1A,ATRIP,SMC1A,PNKP,TUBB,ATR,SMARCAL1,DNA2,ATRX,RAD50,ERCC2,CHD2,PAFAH1B1
GO Function	GO:0003713	Transcription coactivator activity	7	316	0.77	0.0219	CREBBP,SMARCB1,EP300,ARID1B,ASXL1,CENPJ,WWOX
GO Function	GO:0003720	Telomerase activity	2	4	2.13	0.0219	TERT,DKC1
GO Function	GO:0003824	Catalytic activity	35	5486	0.23	0.0235	DHPS,TUBG1,BRIP1,HERC2,CREBBP,PRDX1,EP300,CENPE,FANCM,ERBB2,ATM,KAT6B,BUB1B,TUBA1A,TERT,ATRIP,PNKP,TUBB,ATR,ATG7,SMARCAL1,DNA2,KDM5B,DKC1,PTEN,ATRX,RAD50,ERCC2,CHD2,RBBP8,FANCL,INPP5K,EHMT1,PAFAH1B3,WWOX
GO Function	GO:0016407	Acetyltransferase activity	4	79	1.13	0.0239	CREBBP,EP300,KAT6B,PAFAH1B3
GO Function	GO:0003712	Transcription coregulator activity	9	571	0.63	0.0254	CREBBP,SMARCB1,EP300,ARID1B,KDM5B,ASXL1,CENPJ,RBBP8,WWOX
GO Function	GO:0004402	Histone acetyltransferase activity	3	32	2023-04-01	0.0254	CREBBP,EP300,KAT6B
GO Function	GO:0005524	ATP binding	15	1464	0.44	0.0254	BRIP1,CENPE,FANCM,ERBB2,ATM,BUB1B,SMC1A,PNKP,ATR,SMARCAL1,DNA2,ATRX,RAD50,ERCC2,CHD2
GO Function	GO:0032405	MutLalpha complex binding	2	5	2023-03-02	0.0254	ATRIP,ATR
GO Function	GO:0019904	Protein domain specific binding	10	716	0.57	0.0275	TUBA1A,ATRIP,TUBB,PTEN,ATRX,AR,CENPJ,PAX3,NDE1,EHMT1
GO Function	GO:0032407	MutSalpha complex binding	2	6	1.95	0.0290	ATRIP,ATR
GO Function	GO:0043565	Sequence-specific dna binding	14	1331	0.45	0.0290	CREBBP,SMARCB1,EP300,TINF2,BPTF,TERT,ZNF335,CDK5RAP2,KDM5B,AR,RAD50,PAX3,CHD2,TCF4
GO Function	GO:0042162	Telomeric dna binding	3	36	1.35	0.0301	TINF2,TERT,RAD50
GO Function	GO:0034594	Phosphatidylinositol trisphosphate phosphatase activity	2	7	1.88	0.0339	PTEN,INPP5K
GO Function	GO:0052743	Inositol tetrakisphosphate phosphatase activity	2	7	1.88	0.0339	PTEN,INPP5K
GO Function	GO:0043139	5-3 DNA helicase activity	2	8	1.83	0.0397	DNA2,ERCC2
GO Function	GO:0051539	4 iron, 4 sulfur cluster binding	3	42	1.28	0.0397	BRIP1,DNA2,ERCC2
GO Cellular Component
GO Component	GO:0031981	Nuclear lumen	54	4733	0.49	9.88e-16	NUP107,TUBG1,BRIP1,PALB2,HERC2,CREBBP,SMARCB1,EP300,CENPE,NBN,TINF2,FANCM,ATM,KAT6B,BUB1B,CDT1,BPTF,TERT,FANCI,ATRIP,SMC1A,PNKP,ZNF335,MCPH1,ATR,ARID1B,SMARCAL1,NF1,DNA2,CENPF,SYNE1,KDM5B,DKC1,PTEN,ATRX,AR,ASXL1,FANCG,RAD50,CEP152,CENPJ,BRPF1,FANCA,ERCC2,PAX3,CHD2,TCF4,RBBP8,FANCL,KLLN,EHMT1,WWOX,CIC,GTF2H5
GO Component	GO:0043232	Intracellular non-membrane-bounded organelle	54	4880	0.47	2.12e-15	NUP107,TUBG1,HERC2,CREBBP,SMARCB1,EP300,CENPE,NBN,TINF2,ATM,KAT6B,BUB1B,CDT1,TUBA1A,BPTF,TERT,ATRIP,SMC1A,PNKP,TUBB,MCPH1,ATR,CDK5RAP2,ARID1B,ATG7,SMARCAL1,NF1,DNA2,PCNT,CENPF,SYNE1,ASPM,DKC1,STIL,ATRX,AR,FANCG,RAD50,CEP152,CENPJ,BRPF1,ERCC2,PAX3,CHD2,NDE1,PAFAH1B1,TCF4,RBBP8,KLLN,HYLS1,EHMT1,CIC,GTF2H5,KIZ
GO Component	GO:0005634	Nucleus	63	7390	0.36	6.67e-15	TSC2,NUP107,TUBG1,BRIP1,PALB2,HERC2,CREBBP,PRDX1,SMARCB1,EP300,CENPE,NBN,TINF2,FANCM,ERBB2,ATM,KAT6B,BUB1B,CDT1,TUBA1A,BPTF,TERT,FANCI,ATRIP,SMC1A,PNKP,ZNF335,TUBB,MCPH1,ATR,ARID1B,SMARCAL1,NF1,DNA2,CENPF,SYNE1,KDM5B,ASPM,DKC1,PTEN,ATRX,AR,ASXL1,FANCG,RAD50,CEP152,CENPJ,BRPF1,FANCA,ERCC2,PAX3,CHD2,PAFAH1B1,TCF4,RBBP8,FANCL,KLLN,INPP5K,HYLS1,EHMT1,WWOX,CIC,GTF2H5
GO Component	GO:0005654	Nucleoplasm	48	3973	0.51	2.16e-14	BRIP1,PALB2,HERC2,CREBBP,SMARCB1,EP300,CENPE,NBN,TINF2,FANCM,ATM,KAT6B,CDT1,BPTF,TERT,FANCI,ATRIP,SMC1A,PNKP,ZNF335,MCPH1,ATR,ARID1B,DNA2,CENPF,SYNE1,KDM5B,DKC1,PTEN,ATRX,AR,ASXL1,FANCG,RAD50,CEP152,CENPJ,BRPF1,FANCA,ERCC2,PAX3,CHD2,RBBP8,FANCL,KLLN,EHMT1,WWOX,CIC,GTF2H5
GO Component	GO:0070013	Intracellular organelle lumen	56	5857	0.41	7.25e-14	NUP107,TUBG1,BRIP1,PALB2,HERC2,CREBBP,SMARCB1,EP300,CENPE,NBN,TINF2,FANCM,ATM,KAT6B,BUB1B,CDT1,BPTF,TERT,FANCI,ATRIP,SMC1A,PNKP,ZNF335,TUBB,MCPH1,ATR,ARID1B,ATG7,SMARCAL1,NF1,DNA2,CENPF,SYNE1,KDM5B,DKC1,PTEN,ATRX,AR,ASXL1,FANCG,RAD50,CEP152,CENPJ,BRPF1,FANCA,ERCC2,PAX3,CHD2,TCF4,RBBP8,FANCL,KLLN,EHMT1,WWOX,CIC,GTF2H5
GO Component	GO:0005694	Chromosome	31	1712	0.69	3.47e-12	NUP107,TUBG1,CREBBP,SMARCB1,EP300,CENPE,NBN,TINF2,KAT6B,BUB1B,CDT1,BPTF,TERT,ATRIP,SMC1A,ATR,ARID1B,SMARCAL1,DNA2,CENPF,ATRX,AR,RAD50,BRPF1,PAX3,NDE1,PAFAH1B1,TCF4,RBBP8,EHMT1,CIC
GO Component	GO:0098687	Chromosomal region	14	318	2023-07-01	3.03e-09	NUP107,CENPE,NBN,TINF2,BUB1B,CDT1,TERT,SMC1A,DNA2,CENPF,ATRX,RAD50,NDE1,PAFAH1B1
GO Component	GO:0043229	Intracellular organelle	70	12528	0.18	1.43e-08	TSC2,NUP107,TUBG1,BRIP1,PALB2,HERC2,CREBBP,PRDX1,SMARCB1,EP300,CENPE,NBN,TINF2,FANCM,ERBB2,ATM,KAT6B,BUB1B,CDT1,TUBA1A,BPTF,TERT,FANCI,ATRIP,SMC1A,PNKP,ZNF335,TUBB,MCPH1,ATR,CDK5RAP2,ARID1B,ATG7,SMARCAL1,NF1,DNA2,PCNT,CENPF,SYNE1,KDM5B,ASPM,DKC1,STIL,PTEN,ATRX,AR,ASXL1,FANCG,RAD50,CEP152,CENPJ,BRPF1,FANCA,ERCC2,PAX3,CHD2,NDE1,PAFAH1B1,TCF4,RBBP8,FANCL,KLLN,VPS53,INPP5K,HYLS1,EHMT1,WWOX,CIC,GTF2H5…
GO Component	GO:0043231	Intracellular membrane-bounded organelle	65	10761	0.21	5.30e-08	TSC2,NUP107,TUBG1,BRIP1,PALB2,HERC2,CREBBP,PRDX1,SMARCB1,EP300,CENPE,NBN,TINF2,FANCM,ERBB2,ATM,KAT6B,BUB1B,CDT1,TUBA1A,BPTF,TERT,FANCI,ATRIP,SMC1A,PNKP,ZNF335,TUBB,MCPH1,ATR,CDK5RAP2,ARID1B,SMARCAL1,NF1,DNA2,CENPF,SYNE1,KDM5B,ASPM,DKC1,PTEN,ATRX,AR,ASXL1,FANCG,RAD50,CEP152,CENPJ,BRPF1,FANCA,ERCC2,PAX3,CHD2,PAFAH1B1,TCF4,RBBP8,FANCL,KLLN,VPS53,INPP5K,HYLS1,EHMT1,WWOX,CIC,GTF2H5
GO Component	GO:0015630	Microtubule cytoskeleton	21	1219	0.66	3.24e-07	TUBG1,HERC2,CENPE,ATM,BUB1B,TUBA1A,SMC1A,TUBB,MCPH1,CDK5RAP2,PCNT,CENPF,ASPM,STIL,CEP152,CENPJ,ERCC2,NDE1,PAFAH1B1,HYLS1,KIZ
GO Component	GO:0005622	Intracellular	72	14276	0.13	3.62e-07	DHPS,TSC2,NUP107,TUBG1,BRIP1,PALB2,HERC2,CREBBP,PRDX1,SMARCB1,EP300,CENPE,NBN,TINF2,FANCM,ERBB2,ATM,KAT6B,BUB1B,CDT1,TUBA1A,BPTF,TERT,FANCI,ATRIP,SMC1A,PNKP,ZNF335,TUBB,MCPH1,ATR,CDK5RAP2,ARID1B,ATG7,SMARCAL1,NF1,DNA2,PCNT,CENPF,SYNE1,KDM5B,ASPM,DKC1,STIL,PTEN,ATRX,AR,ASXL1,FANCG,RAD50,CEP152,CENPJ,BRPF1,FANCA,ERCC2,PAX3,CHD2,NDE1,PAFAH1B1,TCF4,RBBP8,FANCL,KLLN,VPS53,INPP5K,HYLS1,EHMT1,PAFAH1B3,W…
GO Component	GO:0000793	Condensed chromosome	10	216	2023-09-01	1.25e-06	NUP107,TUBG1,CENPE,BUB1B,CDT1,SMC1A,CENPF,ATRX,RAD50,NDE1
GO Component	GO:0032991	Protein-containing complex	42	5073	0.35	1.27e-06	TSC2,NUP107,TUBG1,CREBBP,SMARCB1,EP300,CENPE,NBN,TINF2,FANCM,ERBB2,ATM,KAT6B,BUB1B,BPTF,TERT,ATRIP,SMC1A,ZNF335,TUBB,ARID1B,CENPF,SYNE1,KDM5B,DKC1,AR,ASXL1,FANCG,RAD50,CENPJ,BRPF1,FANCA,ERCC2,NDE1,PAFAH1B1,TCF4,RBBP8,FANCL,VPS53,WWOX,CIC,GTF2H5
GO Component	GO:0000228	Nuclear chromosome	20	1256	0.63	2.28e-06	TUBG1,CREBBP,SMARCB1,NBN,TINF2,KAT6B,BUB1B,BPTF,TERT,ATRIP,SMC1A,ARID1B,SMARCAL1,DNA2,ATRX,AR,RAD50,PAX3,TCF4,CIC
GO Component	GO:0000779	Condensed chromosome, centromeric region	8	120	1.25	2.28e-06	NUP107,CENPE,BUB1B,CDT1,SMC1A,CENPF,ATRX,NDE1
GO Component	GO:0000776	Kinetochore	8	134	2023-02-01	4.71e-06	NUP107,CENPE,BUB1B,CDT1,SMC1A,CENPF,NDE1,PAFAH1B1
GO Component	GO:0000775	Chromosome, centromeric region	9	193	2023-01-01	4.80e-06	NUP107,CENPE,BUB1B,CDT1,SMC1A,CENPF,ATRX,NDE1,PAFAH1B1
GO Component	GO:0005819	Spindle	11	353	0.92	7.50e-06	TUBG1,CENPE,ATM,BUB1B,SMC1A,CDK5RAP2,CENPF,ASPM,ERCC2,NDE1,PAFAH1B1
GO Component	GO:0005815	Microtubule organizing center	15	761	0.72	9.90e-06	TUBG1,HERC2,BUB1B,MCPH1,CDK5RAP2,PCNT,CENPF,ASPM,STIL,CEP152,CENPJ,NDE1,PAFAH1B1,HYLS1,KIZ
GO Component	GO:0043227	Membrane-bounded organelle	66	12427	0.15	1.23e-05	TSC2,NUP107,TUBG1,BRIP1,PALB2,HERC2,CREBBP,PRDX1,SMARCB1,EP300,CENPE,NBN,TINF2,FANCM,ERBB2,ATM,KAT6B,BUB1B,CDT1,TUBA1A,BPTF,TERT,FANCI,ATRIP,SMC1A,PNKP,ZNF335,TUBB,MCPH1,ATR,CDK5RAP2,ARID1B,ATG7,SMARCAL1,NF1,DNA2,CENPF,SYNE1,KDM5B,ASPM,DKC1,PTEN,ATRX,AR,ASXL1,FANCG,RAD50,CEP152,CENPJ,BRPF1,FANCA,ERCC2,PAX3,CHD2,PAFAH1B1,TCF4,RBBP8,FANCL,KLLN,VPS53,INPP5K,HYLS1,EHMT1,WWOX,CIC,GTF2H5
GO Component	GO:0000777	Condensed chromosome kinetochore	7	106	1.25	1.40e-05	NUP107,CENPE,BUB1B,CDT1,SMC1A,CENPF,NDE1
GO Component	GO:0043240	Fanconi anaemia nuclear complex	4	13	1.92	2.63e-05	FANCM,FANCG,FANCA,FANCL
GO Component	GO:0005829	Cytosol	39	5193	0.3	6.70e-05	DHPS,TSC2,NUP107,TUBG1,HERC2,PRDX1,EP300,CENPE,NBN,ERBB2,BUB1B,CDT1,TUBA1A,TERT,FANCI,ATRIP,SMC1A,CDK5RAP2,ARID1B,ATG7,NF1,PCNT,CENPF,KDM5B,STIL,PTEN,AR,FANCG,CEP152,CENPJ,BRPF1,ERCC2,NDE1,PAFAH1B1,VPS53,INPP5K,HYLS1,PAFAH1B3,WWOX
GO Component	GO:0005813	Centrosome	12	565	0.76	8.03e-05	TUBG1,CDK5RAP2,PCNT,CENPF,ASPM,STIL,CEP152,CENPJ,NDE1,PAFAH1B1,HYLS1,KIZ
GO Component	GO:0005814	Centriole	7	142	2023-12-01	8.03e-05	TUBG1,HERC2,PCNT,STIL,CEP152,CENPJ,HYLS1
GO Component	GO:0000784	Nuclear chromosome, telomeric region	6	102	2023-02-01	0.00017	NBN,TINF2,TERT,DNA2,ATRX,RAD50
GO Component	GO:0005874	Microtubule	10	407	0.82	0.00017	TUBG1,CENPE,TUBA1A,TUBB,CDK5RAP2,PCNT,ASPM,CENPJ,NDE1,PAFAH1B1
GO Component	GO:0005856	Cytoskeleton	23	2221	0.44	0.00019	TUBG1,HERC2,CENPE,ATM,BUB1B,TUBA1A,SMC1A,TUBB,MCPH1,CDK5RAP2,ATG7,PCNT,CENPF,SYNE1,ASPM,STIL,CEP152,CENPJ,ERCC2,NDE1,PAFAH1B1,HYLS1,KIZ
GO Component	GO:0099080	Supramolecular complex	16	1261	0.53	0.00072	NUP107,TUBG1,CENPE,BUB1B,CDT1,TUBA1A,SMC1A,TUBB,CDK5RAP2,PCNT,CENPF,SYNE1,ASPM,CENPJ,NDE1,PAFAH1B1
GO Component	GO:0000922	Spindle pole	6	161	1.0	0.0018	TUBG1,SMC1A,CDK5RAP2,CENPF,ASPM,NDE1
GO Component	GO:0016604	Nuclear body	12	789	0.61	0.0018	CREBBP,NBN,TINF2,CDT1,TERT,ATR,DKC1,PTEN,ATRX,AR,FANCL,EHMT1
GO Component	GO:0016605	PML body	5	101	2023-12-01	0.0021	NBN,TERT,ATR,PTEN,ATRX
GO Component	GO:0000794	Condensed nuclear chromosome	5	103	2023-11-01	0.0023	TUBG1,BUB1B,SMC1A,ATRX,RAD50
GO Component	GO:0000242	Pericentriolar material	3	21	1.58	0.0041	TUBG1,CDK5RAP2,CEP152
GO Component	GO:0035861	Site of double-strand break	4	60	1.25	0.0041	NBN,SMARCAL1,RAD50,RBBP8
GO Component	GO:1902494	Catalytic complex	15	1328	0.48	0.0043	CREBBP,SMARCB1,EP300,KAT6B,BUB1B,BPTF,TERT,ATRIP,ZNF335,ARID1B,KDM5B,DKC1,BRPF1,ERCC2,GTF2H5
GO Component	GO:1990234	Transferase complex	11	752	0.59	0.0045	CREBBP,EP300,KAT6B,BUB1B,TERT,ATRIP,ZNF335,KDM5B,BRPF1,ERCC2,GTF2H5
GO Component	GO:0030870	Mre11 complex	2	3	2.25	0.0053	NBN,RAD50
GO Component	GO:0035060	Brahma complex	2	3	2.25	0.0053	SMARCB1,ARID1B
GO Component	GO:0097431	Mitotic spindle pole	3	25	1.51	0.0057	SMC1A,CDK5RAP2,ASPM
GO Component	GO:0005730	Nucleolus	12	924	0.54	0.0059	SMARCB1,NBN,ATM,TERT,PNKP,NF1,SYNE1,DKC1,FANCG,CHD2,KLLN,GTF2H5
GO Component	GO:0000123	Histone acetyltransferase complex	4	83	2023-11-01	0.0107	CREBBP,EP300,KAT6B,BRPF1
GO Component	GO:0005635	Nuclear envelope	8	472	0.66	0.0136	NUP107,BRIP1,ATRIP,TUBB,CENPF,SYNE1,PAFAH1B1,FANCL
GO Component	GO:0070776	MOZ/MORF histone acetyltransferase complex	2	7	1.88	0.0156	KAT6B,BRPF1
GO Component	GO:0099512	Supramolecular fiber	11	939	0.5	0.0225	TUBG1,CENPE,TUBA1A,TUBB,CDK5RAP2,PCNT,SYNE1,ASPM,CENPJ,NDE1,PAFAH1B1
GO Component	GO:0005876	Spindle microtubule	3	46	1.24	0.0239	TUBG1,CENPE,PAFAH1B1
GO Component	GO:0043209	Myelin sheath	3	46	1.24	0.0239	ERBB2,TUBA1A,PTEN
GO Component	GO:0032993	protein-DNA complex	5	195	0.84	0.0257	EP300,TINF2,KAT6B,TERT,ATRIP
GO Component	GO:0110165	Cellular anatomical entity	73	17788	0.04	0.0274	DHPS,TSC2,NUP107,DOCK7,TUBG1,BRIP1,PALB2,HERC2,CREBBP,PRDX1,SMARCB1,EP300,CENPE,NBN,TINF2,FANCM,ERBB2,ATM,KAT6B,BUB1B,CDT1,TUBA1A,BPTF,TERT,FANCI,ATRIP,SMC1A,PNKP,ZNF335,TUBB,MCPH1,ATR,CDK5RAP2,ARID1B,ATG7,SMARCAL1,NF1,DNA2,PCNT,CENPF,SYNE1,KDM5B,ASPM,DKC1,STIL,PTEN,ATRX,AR,ASXL1,FANCG,RAD50,CEP152,CENPJ,BRPF1,FANCA,ERCC2,PAX3,CHD2,NDE1,PAFAH1B1,TCF4,RBBP8,FANCL,KLLN,VPS53,INPP5K,HYLS1,EHMT1,PAFA…
GO Component	GO:0000439	Transcription factor tfiih core complex	2	11	1.69	0.0288	ERCC2,GTF2H5
GO Component	GO:0005675	Transcription factor tfiih holo complex	2	12	1.65	0.0325	ERCC2,GTF2H5
GO Component	GO:0005871	Kinesin complex	3	53	1.18	0.0325	CENPE,NDE1,PAFAH1B1
GO Component	GO:0072686	Mitotic spindle	4	121	0.95	0.0325	CENPE,SMC1A,CDK5RAP2,ASPM
GO Component	GO:0000783	Nuclear telomere cap complex	2	13	1.62	0.0362	TINF2,TERT
GO Component	GO:0000940	Condensed chromosome outer kinetochore	2	13	1.62	0.0362	BUB1B,CENPF
GO Component	GO:0034399	Nuclear periphery	4	133	0.91	0.0419	NUP107,TINF2,SMC1A,CENPF
GO Component	GO:0000790	Nuclear chromatin	11	1048	0.45	0.0425	CREBBP,SMARCB1,KAT6B,BPTF,ARID1B,ATRX,AR,RAD50,PAX3,TCF4,CIC
GO Component	GO:0071565	nBAF complex	2	15	1.55	0.0428	SMARCB1,ARID1B
GO Component	GO:0000930	Gamma-tubulin complex	2	16	1.53	0.0470	TUBG1,CENPJ
GO Component	GO:0005657	Replication fork	3	64	2023-01-01	0.0470	NBN,ATRIP,SMARCAL1
Reactome
Reactome	HSA-1640170	Cell Cycle	31	647	2023-11-01	5.26e-23	NUP107,TUBG1,BRIP1,HERC2,EP300,CENPE,NBN,TINF2,ATM,BUB1B,CDT1,TUBA1A,TERT,ATRIP,SMC1A,TUBB,MCPH1,ATR,CDK5RAP2,DNA2,PCNT,CENPF,SYNE1,DKC1,ATRX,RAD50,CEP152,CENPJ,NDE1,PAFAH1B1,RBBP8
Reactome	HSA-73894	DNA Repair	20	309	1.24	3.56e-16	BRIP1,PALB2,HERC2,EP300,NBN,TINF2,FANCM,ATM,FANCI,ATRIP,PNKP,ATR,DNA2,FANCG,RAD50,FANCA,ERCC2,RBBP8,FANCL,GTF2H5
Reactome	HSA-3700989	Transcriptional Regulation by TP53	19	363	1.15	8.75e-14	TSC2,BRIP1,CREBBP,PRDX1,EP300,NBN,ATM,FANCI,ATRIP,ATR,DNA2,PTEN,RAD50,CENPJ,BRPF1,ERCC2,RBBP8,EHMT1,GTF2H5
Reactome	HSA-68877	Mitotic Prometaphase	14	199	1.28	2.32e-11	NUP107,TUBG1,CENPE,BUB1B,TUBA1A,SMC1A,TUBB,CDK5RAP2,PCNT,CENPF,CEP152,CENPJ,NDE1,PAFAH1B1
Reactome	HSA-69620	Cell Cycle Checkpoints	15	269	1.17	5.21e-11	NUP107,BRIP1,HERC2,CENPE,NBN,ATM,BUB1B,ATRIP,ATR,DNA2,CENPF,RAD50,NDE1,PAFAH1B1,RBBP8
Reactome	HSA-5693579	Homologous DNA Pairing and Strand Exchange	9	41	1.77	6.53e-11	BRIP1,PALB2,NBN,ATM,ATRIP,ATR,DNA2,RAD50,RBBP8
Reactome	HSA-212436	Generic Transcription Pathway	25	1197	0.75	2.22e-10	TSC2,BRIP1,CREBBP,PRDX1,SMARCB1,EP300,NBN,ERBB2,ATM,FANCI,ATRIP,ATR,ARID1B,DNA2,KDM5B,PTEN,AR,RAD50,CENPJ,BRPF1,ERCC2,RBBP8,EHMT1,WWOX,GTF2H5
Reactome	HSA-69278	Cell Cycle, Mitotic	18	518	0.97	2.22e-10	NUP107,TUBG1,EP300,CENPE,BUB1B,CDT1,TUBA1A,SMC1A,TUBB,MCPH1,CDK5RAP2,DNA2,PCNT,CENPF,CEP152,CENPJ,NDE1,PAFAH1B1
Reactome	HSA-5685938	HDR through Single Strand Annealing (SSA)	8	36	1.77	9.43e-10	BRIP1,NBN,ATM,ATRIP,ATR,DNA2,RAD50,RBBP8
Reactome	HSA-5693616	Presynaptic phase of homologous DNA pairing and strand exchange	8	38	1.75	1.24e-09	BRIP1,NBN,ATM,ATRIP,ATR,DNA2,RAD50,RBBP8
Reactome	HSA-74160	Gene expression (Transcription)	26	1455	0.68	1.27e-09	TSC2,NUP107,BRIP1,CREBBP,PRDX1,SMARCB1,EP300,NBN,ERBB2,ATM,FANCI,ATRIP,ATR,ARID1B,DNA2,KDM5B,PTEN,AR,RAD50,CENPJ,BRPF1,ERCC2,RBBP8,EHMT1,WWOX,GTF2H5
Reactome	HSA-380259	Loss of Nlp from mitotic centrosomes	9	69	1.54	1.85e-09	TUBG1,TUBA1A,TUBB,CDK5RAP2,PCNT,CEP152,CENPJ,NDE1,PAFAH1B1
Reactome	HSA-68886	M Phase	15	376	2023-03-01	1.85e-09	NUP107,TUBG1,CENPE,BUB1B,TUBA1A,SMC1A,TUBB,MCPH1,CDK5RAP2,PCNT,CENPF,CEP152,CENPJ,NDE1,PAFAH1B1
Reactome	HSA-8854518	AURKA Activation by TPX2	9	72	1.53	2.19e-09	TUBG1,TUBA1A,TUBB,CDK5RAP2,PCNT,CEP152,CENPJ,NDE1,PAFAH1B1
Reactome	HSA-5693554	Resolution of D-loop Structures through Synthesis-Dependent Strand Annealing (SDSA)	7	25	1.88	2.75e-09	BRIP1,PALB2,NBN,ATM,DNA2,RAD50,RBBP8
Reactome	HSA-5693567	HDR through Homologous Recombination (HRR) or Single Strand Annealing (SSA)	10	113	1.38	3.26e-09	BRIP1,PALB2,HERC2,NBN,ATM,ATRIP,ATR,DNA2,RAD50,RBBP8
Reactome	HSA-5633007	Regulation of TP53 Activity	11	159	1.27	3.59e-09	BRIP1,EP300,NBN,ATM,ATRIP,ATR,DNA2,RAD50,BRPF1,RBBP8,EHMT1
Reactome	HSA-69473	G2/M DNA damage checkpoint	9	78	1.49	3.59e-09	BRIP1,HERC2,NBN,ATM,ATRIP,ATR,DNA2,RAD50,RBBP8
Reactome	HSA-380270	Recruitment of mitotic centrosome proteins and complexes	9	80	1.48	4.03e-09	TUBG1,TUBA1A,TUBB,CDK5RAP2,PCNT,CEP152,CENPJ,NDE1,PAFAH1B1
Reactome	HSA-5693607	Processing of DNA double-strand break ends	9	81	1.47	4.09e-09	BRIP1,HERC2,NBN,ATM,ATRIP,ATR,DNA2,RAD50,RBBP8
Reactome	HSA-2565942	Regulation of PLK1 Activity at G2/M Transition	9	87	1.44	6.81e-09	TUBG1,TUBA1A,TUBB,CDK5RAP2,PCNT,CEP152,CENPJ,NDE1,PAFAH1B1
Reactome	HSA-5693568	Resolution of D-loop Structures through Holliday Junction Intermediates	7	31	1.78	6.81e-09	BRIP1,PALB2,NBN,ATM,DNA2,RAD50,RBBP8
Reactome	HSA-380320	Recruitment of NuMA to mitotic centrosomes	9	93	1.41	1.06e-08	TUBG1,TUBA1A,TUBB,CDK5RAP2,PCNT,CEP152,CENPJ,NDE1,PAFAH1B1
Reactome	HSA-5620912	Anchoring of the basal body to the plasma membrane	9	97	2023-04-01	1.45e-08	TUBG1,TUBA1A,TUBB,CDK5RAP2,PCNT,CEP152,CENPJ,NDE1,PAFAH1B1
Reactome	HSA-69275	G2/M Transition	11	193	1.18	1.65e-08	TUBG1,EP300,TUBA1A,TUBB,CDK5RAP2,PCNT,CENPF,CEP152,CENPJ,NDE1,PAFAH1B1
Reactome	HSA-6783310	Fanconi Anemia Pathway	7	37	1.71	1.70e-08	FANCM,FANCI,ATRIP,ATR,FANCG,FANCA,FANCL
Reactome	HSA-1500620	Meiosis	8	87	1.39	1.43e-07	NBN,TINF2,ATM,SMC1A,ATR,SYNE1,RAD50,RBBP8
Reactome	HSA-6804756	Regulation of TP53 Activity through Phosphorylation	8	92	1.37	2.10e-07	BRIP1,NBN,ATM,ATRIP,ATR,DNA2,RAD50,RBBP8
Reactome	HSA-2500257	Resolution of Sister Chromatid Cohesion	8	122	1.24	1.55e-06	NUP107,CENPE,BUB1B,TUBA1A,SMC1A,CENPF,NDE1,PAFAH1B1
Reactome	HSA-1852241	Organelle biogenesis and maintenance	10	290	0.97	8.38e-06	TUBG1,CREBBP,TUBA1A,TUBB,CDK5RAP2,PCNT,CEP152,CENPJ,NDE1,PAFAH1B1
Reactome	HSA-3247509	Chromatin modifying enzymes	9	237	2023-01-01	1.61e-05	CREBBP,SMARCB1,EP300,KAT6B,ARID1B,KDM5B,BRPF1,PAX3,EHMT1
Reactome	HSA-9648025	EML4 and NUDC in mitotic spindle formation	7	113	1.22	1.61e-05	NUP107,CENPE,BUB1B,TUBA1A,CENPF,NDE1,PAFAH1B1
Reactome	HSA-8864260	Transcriptional regulation by the AP-2 (TFAP2) family of transcription factors	5	35	1.58	1.77e-05	CREBBP,EP300,ERBB2,KDM5B,WWOX
Reactome	HSA-2467813	Separation of Sister Chromatids	8	184	2023-07-01	2.66e-05	NUP107,CENPE,BUB1B,TUBA1A,SMC1A,CENPF,NDE1,PAFAH1B1
Reactome	HSA-2262752	Cellular responses to stress	12	544	0.77	4.15e-05	NUP107,CREBBP,PRDX1,EP300,NBN,TINF2,ATM,TUBA1A,ATR,AR,RAD50,EHMT1
Reactome	HSA-5663220	RHO GTPases Activate Formins	7	136	1.14	4.62e-05	NUP107,CENPE,BUB1B,TUBA1A,CENPF,NDE1,PAFAH1B1
Reactome	HSA-141444	Amplification of signal from unattached kinetochores via a MAD2 inhibitory signal	6	92	1.24	7.47e-05	NUP107,CENPE,BUB1B,CENPF,NDE1,PAFAH1B1
Reactome	HSA-5693548	Sensing of DNA Double Strand Breaks	3	6	2.13	0.00016	NBN,ATM,RAD50
Reactome	HSA-6796648	TP53 Regulates Transcription of DNA Repair Genes	5	65	1.31	0.00024	ATM,FANCI,ATR,ERCC2,GTF2H5
Reactome	HSA-5685939	HDR through MMEJ (alt-NHEJ)	3	10	1.91	0.00052	NBN,RAD50,RBBP8
Reactome	HSA-195258	RHO GTPase Effectors	8	289	0.87	0.00053	NUP107,CENPE,BUB1B,TUBA1A,CENPF,AR,NDE1,PAFAH1B1
Reactome	HSA-8866907	Activation of the TFAP2 (AP-2) family of transcription factors	3	12	1.83	0.00080	CREBBP,EP300,WWOX
Reactome	HSA-3371556	Cellular response to heat stress	5	89	1.18	0.00095	NUP107,CREBBP,EP300,ATM,ATR
Reactome	HSA-157579	Telomere Maintenance	5	92	1.16	0.0011	TINF2,TERT,DNA2,DKC1,ATRX
Reactome	HSA-3108232	SUMO E3 ligases SUMOylate target proteins	6	166	0.99	0.0015	NUP107,HERC2,CREBBP,EP300,SMC1A,AR
Reactome	HSA-180786	Extension of Telomeres	4	50	1.33	0.0017	TINF2,TERT,DNA2,DKC1
Reactome	HSA-5693571	Nonhomologous End-Joining (NHEJ)	4	52	1.31	0.0019	HERC2,NBN,ATM,RAD50
Reactome	HSA-3214847	HATs acetylate histones	5	107	2023-01-01	0.0020	CREBBP,EP300,KAT6B,BRPF1,PAX3
Reactome	HSA-912446	Meiotic recombination	4	55	1.29	0.0022	NBN,ATM,RAD50,RBBP8
Reactome	HSA-6804760	Regulation of TP53 Activity through Methylation	3	19	1.63	0.0023	EP300,ATM,EHMT1
Reactome	HSA-1221632	Meiotic synapsis	4	60	1.25	0.0029	TINF2,SMC1A,ATR,SYNE1
Reactome	HSA-5693565	Recruitment and ATM-mediated phosphorylation of repair and signaling proteins at DNA double strand breaks	4	60	1.25	0.0029	HERC2,NBN,ATM,RAD50
Reactome	HSA-2559586	DNA Damage/Telomere Stress Induced Senescence	4	61	1.24	0.0030	NBN,TINF2,ATM,RAD50
Reactome	HSA-171319	Telomere Extension By Telomerase	3	22	1.56	0.0031	TINF2,TERT,DKC1
Reactome	HSA-1632852	Macroautophagy	5	133	1.0	0.0047	TSC2,ATM,TUBA1A,ATG7,PCNT
Reactome	HSA-3134973	LRR FLII-interacting protein 1 (LRRFIP1) activates type I IFN production	2	5	2023-03-02	0.0079	CREBBP,EP300
Reactome	HSA-8939243	RUNX1 interacts with co-factors whose precise effect on RUNX1 targets is not known	3	36	1.35	0.0112	SMARCB1,EP300,ARID1B
Reactome	HSA-2559583	Cellular Senescence	5	164	0.91	0.0113	NBN,TINF2,ATM,RAD50,EHMT1
Reactome	HSA-5663202	Diseases of signal transduction by growth factor receptors and second messengers	7	392	0.68	0.0187	TSC2,CREBBP,EP300,ERBB2,ATG7,NF1,PTEN
Reactome	HSA-9617629	Regulation of FOXO transcriptional activity by acetylation	2	10	1.73	0.0233	CREBBP,EP300
Reactome	HSA-6811442	Intra-Golgi and retrograde Golgi-to-ER traffic	5	198	0.83	0.0250	CENPE,TUBA1A,PAFAH1B1,VPS53,PAFAH1B3
Reactome	HSA-6811436	COPI-independent Golgi-to-ER retrograde traffic	3	50	1.21	0.0261	TUBA1A,PAFAH1B1,PAFAH1B3
Reactome	HSA-1234158	Regulation of gene expression by Hypoxia-inducible Factor	2	11	1.69	0.0265	CREBBP,EP300
Reactome	HSA-6781823	Formation of TC-NER Pre-Incision Complex	3	53	1.18	0.0299	EP300,ERCC2,GTF2H5
Reactome	HSA-2564830	Cytosolic iron-sulfur cluster assembly	2	13	1.62	0.0346	BRIP1,ERCC2
Reactome	HSA-3371568	Attenuation phase	2	13	1.62	0.0346	CREBBP,EP300
Reactome	HSA-8856688	Golgi-to-ER retrograde transport	4	130	0.92	0.0382	CENPE,TUBA1A,PAFAH1B1,PAFAH1B3
Reactome	HSA-8941856	RUNX3 regulates NOTCH signaling	2	14	1.58	0.0382	CREBBP,EP300
Reactome	HSA-918233	TRAF3-dependent IRF activation pathway	2	14	1.58	0.0382	CREBBP,EP300
Reactome	HSA-1643685	Disease	14	1548	0.38	0.0388	TSC2,NUP107,CREBBP,PRDX1,EP300,ERBB2,TUBA1A,TUBB,ATG7,NF1,PTEN,ATRX,ERCC2,GTF2H5
Reactome	HSA-201722	Formation of the beta-catenin:TCF transactivating complex	3	60	1.13	0.0389	CREBBP,EP300,TERT
Reactome	HSA-9614657	FOXO-mediated transcription of cell death genes	2	15	1.55	0.0413	CREBBP,EP300
Reactome	HSA-156711	Polo-like kinase mediated events	2	16	1.53	0.0455	EP300,CENPF
Reactome	HSA-210744	Regulation of gene expression in late stage (branching morphogenesis) pancreatic bud precursor cells	2	16	1.53	0.0455	CREBBP,EP300
Reactome	HSA-6782210	Gap-filling DNA repair synthesis and ligation in TC-NER	3	64	2023-01-01	0.0455	EP300,ERCC2,GTF2H5
Reactome	HSA-6782135	Dual incision in TC-NER	3	65	2023-09-01	0.0460	EP300,ERCC2,GTF2H5
Reactome	HSA-174437	Removal of the Flap Intermediate from the C-strand	2	17	2023-05-01	0.0491	TINF2,DNA2

## Sheet: Enrichment subnetwork3 seizure 
#category	term ID	term description	observed gene count	background gene count	strength	false discovery rate	matching proteins in your network (labels)
GO Biological Process
GO Process	GO:0050953	Sensory perception of light stimulus	32	224	1.62	7.72e-39	USH1C,CRX,WFS1,TULP1,PRPH2,BBS2,MKKS,CNGB1,GUCY2D,PDE6A,RPE65,RLBP1,ROM1,BBS5,USH2A,BBS1,ZNF513,CLRN1,MYO9A,CRB1,ABCA4,AIPL1,BBS10,CDH23,CNGA1,MYO7A,BEST1,PDE6B,EYS,RDH12,RBP3,NR2E3
GO Process	GO:0007601	Visual perception	31	220	1.61	1.55e-37	CRX,WFS1,TULP1,PRPH2,BBS2,MKKS,CNGB1,GUCY2D,PDE6A,RPE65,RLBP1,ROM1,BBS5,USH2A,BBS1,ZNF513,CLRN1,MYO9A,CRB1,ABCA4,AIPL1,BBS10,CDH23,CNGA1,MYO7A,BEST1,PDE6B,EYS,RDH12,RBP3,NR2E3
GO Process	GO:0060271	Cilium assembly	28	339	1.38	1.87e-27	CEP41,BBS2,MKKS,CEP164,BBS5,IQCB1,TMEM107,PIBF1,BBS1,NPHP3,OFD1,KIAA0586,AHI1,RPGRIP1L,MKS1,BBS10,ARL13B,CEP83,DYNC2H1,WDR19,C5orf42,TMEM67,CC2D2A,IFT74,IFT140,TMEM216,CEP290,ALMS1
GO Process	GO:0120036	Plasma membrane bounded cell projection organization	37	1122	0.98	7.51e-25	USH1C,CEP41,TULP1,BBS2,MKKS,CEP164,BBS5,SHH,IQCB1,TMEM107,PIBF1,BBS1,CLRN1,PTCH1,NPHP3,OFD1,KIAA0586,AHI1,RPGRIP1L,MKS1,BBS10,ARL13B,GLI3,CEP83,DYNC2H1,CDH23,WDR19,MYO7A,C5orf42,TMEM67,CC2D2A,IFT74,IFT140,TRIM32,TMEM216,CEP290,ALMS1
GO Process	GO:0001895	Retina homeostasis	17	74	1.83	1.73e-22	USH1C,TULP1,BBS2,MKKS,CNGB1,RPE65,USH2A,IQCB1,BBS1,CLRN1,NPHP3,CRB1,ABCA4,AIPL1,BBS10,CDH23,RDH12
GO Process	GO:0045494	Photoreceptor cell maintenance	15	41	2023-03-02	3.45e-22	USH1C,TULP1,BBS2,MKKS,CNGB1,USH2A,IQCB1,BBS1,CLRN1,NPHP3,CRB1,ABCA4,BBS10,CDH23,RDH12
GO Process	GO:0070925	Organelle assembly	30	735	2023-08-01	8.97e-22	CEP41,BBS2,MKKS,CEP164,BBS5,IQCB1,TMEM107,PIBF1,BBS1,NPHP3,OFD1,KIAA0586,KIAA0753,AHI1,RPGRIP1L,MKS1,BBS10,ARL13B,CEP83,DYNC2H1,WDR19,MYO7A,C5orf42,TMEM67,CC2D2A,IFT74,IFT140,TMEM216,CEP290,ALMS1
GO Process	GO:1905515	Non-motile cilium assembly	14	45	1.96	7.95e-20	BBS2,MKKS,TMEM107,PIBF1,BBS1,RPGRIP1L,MKS1,BBS10,ARL13B,DYNC2H1,CC2D2A,IFT74,IFT140,TMEM216
GO Process	GO:0001894	Tissue homeostasis	19	219	2023-04-01	2.48e-18	USH1C,TULP1,BBS2,MKKS,CNGB1,RPE65,USH2A,IQCB1,BBS1,CLRN1,NPHP3,CRB1,ABCA4,AIPL1,MKS1,BBS10,CDH23,TRIM32,RDH12
GO Process	GO:0050877	Nervous system process	33	1352	0.85	8.07e-18	USH1C,CRX,WFS1,TULP1,PRPH2,BBS2,MKKS,CNGB1,GUCY2D,PDE6A,RPE65,RLBP1,ROM1,BBS5,USH2A,BBS1,ZNF513,CLRN1,MYO9A,CRB1,ABCA4,AIPL1,BBS10,CDH23,WDR19,CNGA1,MYO7A,BEST1,PDE6B,EYS,RDH12,RBP3,NR2E3
GO Process	GO:0007423	Sensory organ development	24	563	2023-01-01	3.85e-17	USH1C,TULP1,PRPH2,PDE6A,RPE65,ROM1,MITF,SHH,USH2A,ZNF513,CLRN1,CRB1,AHI1,RPGRIP1L,MKS1,GLI3,CDH23,WDR19,MYO7A,CC2D2A,IFT140,PDE6B,CEP290,NR2E3
GO Process	GO:0048871	Multicellular organismal homeostasis	20	352	1.22	4.16e-16	USH1C,WFS1,TULP1,BBS2,MKKS,CNGB1,RPE65,USH2A,IQCB1,BBS1,CLRN1,NPHP3,CRB1,ABCA4,AIPL1,MKS1,BBS10,CDH23,TRIM32,RDH12
GO Process	GO:0001654	Eye development	20	365	2023-02-01	7.71e-16	USH1C,TULP1,PRPH2,PDE6A,RPE65,ROM1,MITF,SHH,ZNF513,CRB1,AHI1,RPGRIP1L,GLI3,WDR19,MYO7A,CC2D2A,IFT140,PDE6B,CEP290,NR2E3
GO Process	GO:0009583	Detection of light stimulus	12	61	1.76	8.44e-15	TULP1,CNGB1,PDE6A,RPE65,CRB1,ABCA4,AIPL1,CNGA1,BEST1,PDE6B,EYS,NR2E3
GO Process	GO:0097711	Ciliary basal body-plasma membrane docking	13	95	2023-06-01	2.32e-14	CEP41,CEP164,IQCB1,OFD1,AHI1,RPGRIP1L,MKS1,CEP83,TMEM67,CC2D2A,TMEM216,CEP290,ALMS1
GO Process	GO:0043010	Camera-type eye development	18	318	1.22	2.46e-14	USH1C,TULP1,PRPH2,PDE6A,RPE65,ROM1,MITF,SHH,ZNF513,CRB1,AHI1,RPGRIP1L,GLI3,WDR19,CC2D2A,IFT140,PDE6B,NR2E3
GO Process	GO:0009584	Detection of visible light	11	48	1.83	3.91e-14	TULP1,CNGB1,PDE6A,RPE65,CRB1,ABCA4,AIPL1,CNGA1,BEST1,PDE6B,EYS
GO Process	GO:0046530	Photoreceptor cell differentiation	11	59	1.74	2.72e-13	USH1C,TULP1,CNGB1,RPE65,ROM1,CRB1,AHI1,MYO7A,IFT140,CEP290,NR2E3
GO Process	GO:0007368	Determination of left/right symmetry	13	120	2023-05-01	2.97e-13	MKKS,BBS5,SHH,NPHP3,OFD1,AHI1,RPGRIP1L,MKS1,ARL13B,DYNC2H1,CC2D2A,IFT74,IFT140
GO Process	GO:0009581	Detection of external stimulus	13	131	1.46	7.68e-13	TULP1,MKKS,CNGB1,PDE6A,RPE65,CRB1,ABCA4,AIPL1,CNGA1,BEST1,PDE6B,EYS,NR2E3
GO Process	GO:0009582	Detection of abiotic stimulus	13	133	1.46	8.92e-13	TULP1,MKKS,CNGB1,PDE6A,RPE65,CRB1,ABCA4,AIPL1,CNGA1,BEST1,PDE6B,EYS,NR2E3
GO Process	GO:0042461	Photoreceptor cell development	10	47	1.79	1.57e-12	USH1C,TULP1,CNGB1,RPE65,CRB1,AHI1,MYO7A,IFT140,CEP290,NR2E3
GO Process	GO:0048598	Embryonic morphogenesis	20	571	2023-01-01	1.59e-12	USH1C,MKKS,BBS5,SHH,TMEM107,CLRN1,PTCH1,NPHP3,AHI1,RPGRIP1L,MKS1,ARL13B,GLI3,DYNC2H1,WDR19,MYO7A,C5orf42,CC2D2A,IFT140,CEP290
GO Process	GO:0022607	Cellular component assembly	34	2359	0.62	5.90e-12	USH1C,CEP41,BBS2,MKKS,CEP164,BBS5,MITF,IQCB1,TMEM107,PIBF1,BBS1,NPHP3,OFD1,KIAA0586,MYO9A,KIAA0753,AHI1,RPGRIP1L,MKS1,BBS10,ARL13B,CEP83,DYNC2H1,CDH23,WDR19,MYO7A,C5orf42,TMEM67,CC2D2A,IFT74,IFT140,TMEM216,CEP290,ALMS1
GO Process	GO:0032501	Multicellular organismal process	54	6933	0.36	1.77e-11	USH1C,CRX,WFS1,TULP1,PRPH2,BBS2,MKKS,CNGB1,GUCY2D,PDE6A,RPE65,RLBP1,ROM1,BBS5,MITF,SHH,CEP120,USH2A,IQCB1,TMEM107,BBS1,ZNF513,CLRN1,PTCH1,NPHP3,OFD1,MYO9A,CRB1,AHI1,ABCA4,RPGRIP1L,AIPL1,MKS1,BBS10,ARL13B,GLI3,DYNC2H1,CDH23,WDR19,CNGA1,MYO7A,C5orf42,BEST1,CC2D2A,IFT74,IFT140,TRIM32,PDE6B,EYS,GPR161,CEP290,RDH12,RBP3,NR2E3
GO Process	GO:0009887	Animal organ morphogenesis	23	967	0.84	2.42e-11	USH1C,CRX,TULP1,BBS2,MKKS,RPE65,ROM1,BBS5,SHH,USH2A,CLRN1,PTCH1,NPHP3,CRB1,AHI1,MKS1,ARL13B,GLI3,WDR19,MYO7A,IFT140,CEP290,NR2E3
GO Process	GO:0007389	Pattern specification process	17	432	2023-06-01	3.59e-11	MKKS,BBS5,SHH,TMEM107,PTCH1,NPHP3,OFD1,AHI1,RPGRIP1L,MKS1,ARL13B,GLI3,DYNC2H1,WDR19,CC2D2A,IFT74,IFT140
GO Process	GO:0051640	Organelle localization	19	598	0.97	3.96e-11	CEP41,BBS2,MKKS,CEP164,BBS5,CEP120,IQCB1,PIBF1,OFD1,AHI1,RPGRIP1L,MKS1,CEP83,MYO7A,TMEM67,CC2D2A,TMEM216,CEP290,ALMS1
GO Process	GO:0061512	Protein localization to cilium	9	51	1.71	1.38e-10	TULP1,TMEM107,BBS1,ARL13B,DYNC2H1,WDR19,C5orf42,CC2D2A,IFT140
GO Process	GO:0048513	Animal organ development	37	3197	0.53	1.44e-10	USH1C,CRX,WFS1,TULP1,PRPH2,BBS2,MKKS,PDE6A,RPE65,ROM1,BBS5,MITF,SHH,CEP120,USH2A,IQCB1,ZNF513,CLRN1,PTCH1,NPHP3,CRB1,AHI1,RPGRIP1L,MKS1,ARL13B,GLI3,DYNC2H1,CDH23,WDR19,MYO7A,C5orf42,CC2D2A,IFT74,IFT140,PDE6B,CEP290,NR2E3
GO Process	GO:0021532	Neural tube patterning	8	35	1.82	4.50e-10	SHH,TMEM107,PTCH1,RPGRIP1L,ARL13B,GLI3,WDR19,IFT140
GO Process	GO:0048568	Embryonic organ development	16	448	2023-02-01	7.61e-10	USH1C,MKKS,BBS5,SHH,CLRN1,PTCH1,NPHP3,AHI1,MKS1,ARL13B,GLI3,WDR19,MYO7A,CC2D2A,IFT140,CEP290
GO Process	GO:0009653	Anatomical structure morphogenesis	30	2165	0.61	9.99e-10	USH1C,CRX,TULP1,BBS2,MKKS,RPE65,ROM1,BBS5,SHH,USH2A,TMEM107,CLRN1,PTCH1,NPHP3,MYO9A,CRB1,AHI1,RPGRIP1L,MKS1,ARL13B,GLI3,DYNC2H1,CDH23,WDR19,MYO7A,C5orf42,CC2D2A,IFT140,CEP290,NR2E3
GO Process	GO:0060041	Retina development in camera-type eye	11	142	1.35	1.06e-09	USH1C,TULP1,PRPH2,PDE6A,RPE65,ROM1,ZNF513,CRB1,AHI1,PDE6B,NR2E3
GO Process	GO:0007399	Nervous system development	31	2371	0.58	1.55e-09	USH1C,CRX,TULP1,BBS2,MKKS,CNGB1,RPE65,ROM1,SHH,CEP120,USH2A,TMEM107,CLRN1,PTCH1,MYO9A,CRB1,AHI1,RPGRIP1L,MKS1,ARL13B,GLI3,DYNC2H1,CDH23,WDR19,MYO7A,C5orf42,CC2D2A,IFT140,TRIM32,CEP290,NR2E3
GO Process	GO:0060429	Epithelium development	22	1109	0.76	2.54e-09	USH1C,MKKS,BBS5,SHH,USH2A,TMEM107,CLRN1,PTCH1,NPHP3,MYO9A,AHI1,RPGRIP1L,MKS1,ARL13B,GLI3,WDR19,MYO7A,C5orf42,CC2D2A,IFT74,IFT140,CEP290
GO Process	GO:0051641	Cellular localization	34	2967	0.52	2.99e-09	CEP41,TULP1,BBS2,MKKS,CNGB1,CEP164,BBS5,SHH,CEP120,IQCB1,TMEM107,PIBF1,BBS1,PTCH1,OFD1,IMPDH1,KIAA0753,CRB1,AHI1,RPGRIP1L,MKS1,ARL13B,CEP83,DYNC2H1,WDR19,MYO7A,C5orf42,TMEM67,CC2D2A,IFT74,IFT140,TMEM216,CEP290,ALMS1
GO Process	GO:0048731	System development	41	4426	0.43	3.92e-09	USH1C,CRX,WFS1,TULP1,PRPH2,BBS2,MKKS,CNGB1,PDE6A,RPE65,ROM1,BBS5,MITF,SHH,CEP120,USH2A,IQCB1,TMEM107,ZNF513,CLRN1,PTCH1,NPHP3,MYO9A,CRB1,AHI1,RPGRIP1L,MKS1,ARL13B,GLI3,DYNC2H1,CDH23,WDR19,MYO7A,C5orf42,CC2D2A,IFT74,IFT140,TRIM32,PDE6B,CEP290,NR2E3
GO Process	GO:0043583	Ear development	12	225	1.19	5.86e-09	USH1C,SHH,USH2A,CLRN1,AHI1,RPGRIP1L,MKS1,GLI3,CDH23,WDR19,MYO7A,CEP290
GO Process	GO:0030326	Embryonic limb morphogenesis	10	127	1.36	8.26e-09	SHH,TMEM107,PTCH1,RPGRIP1L,MKS1,GLI3,DYNC2H1,WDR19,C5orf42,IFT140
GO Process	GO:0048562	Embryonic organ morphogenesis	13	301	2023-01-01	9.39e-09	USH1C,MKKS,BBS5,SHH,CLRN1,NPHP3,AHI1,ARL13B,GLI3,WDR19,MYO7A,IFT140,CEP290
GO Process	GO:0007275	Multicellular organism development	43	5023	0.4	9.59e-09	USH1C,CRX,WFS1,TULP1,PRPH2,BBS2,MKKS,CNGB1,PDE6A,RPE65,ROM1,BBS5,MITF,SHH,CEP120,USH2A,IQCB1,TMEM107,ZNF513,CLRN1,PTCH1,NPHP3,OFD1,MYO9A,CRB1,AHI1,RPGRIP1L,MKS1,ARL13B,GLI3,DYNC2H1,CDH23,WDR19,MYO7A,C5orf42,CC2D2A,IFT74,IFT140,TRIM32,PDE6B,GPR161,CEP290,NR2E3
GO Process	GO:0009416	Response to light stimulus	13	302	2023-01-01	9.59e-09	TULP1,CNGB1,PDE6A,RPE65,CRB1,ABCA4,AIPL1,CNGA1,BEST1,TRIM32,PDE6B,EYS,NR2E3
GO Process	GO:0048856	Anatomical structure development	44	5402	0.38	2.31e-08	USH1C,CRX,WFS1,TULP1,PRPH2,BBS2,MKKS,CNGB1,PDE6A,RPE65,ROM1,BBS5,MITF,SHH,CEP120,USH2A,IQCB1,TMEM107,ZNF513,CLRN1,PTCH1,NPHP3,OFD1,MYO9A,CRB1,AHI1,RPGRIP1L,MKS1,ARL13B,GLI3,DYNC2H1,CDH23,WDR19,MYO7A,C5orf42,CC2D2A,IFT74,IFT140,TRIM32,PDE6B,EYS,GPR161,CEP290,NR2E3
GO Process	GO:0048839	Inner ear development	11	198	1.21	2.46e-08	USH1C,SHH,USH2A,CLRN1,AHI1,RPGRIP1L,MKS1,GLI3,CDH23,MYO7A,CEP290
GO Process	GO:0030182	Neuron differentiation	20	1019	0.76	2.77e-08	USH1C,TULP1,CNGB1,RPE65,ROM1,SHH,USH2A,CLRN1,PTCH1,CRB1,AHI1,MKS1,GLI3,DYNC2H1,CDH23,MYO7A,IFT140,TRIM32,CEP290,NR2E3
GO Process	GO:0090596	Sensory organ morphogenesis	12	264	2023-12-01	2.89e-08	USH1C,TULP1,RPE65,ROM1,CLRN1,CRB1,AHI1,GLI3,WDR19,MYO7A,CEP290,NR2E3
GO Process	GO:0016043	Cellular component organization	44	5447	0.37	2.91e-08	USH1C,CEP41,TULP1,BBS2,MKKS,CNGB1,CEP164,BBS5,MITF,SHH,CEP120,IQCB1,TMEM107,PIBF1,BBS1,CLRN1,PTCH1,NPHP3,OFD1,KIAA0586,MYO9A,KIAA0753,CRB1,AHI1,ABCA4,RPGRIP1L,MKS1,BBS10,ARL13B,GLI3,CEP83,DYNC2H1,CDH23,WDR19,MYO7A,C5orf42,TMEM67,CC2D2A,IFT74,IFT140,TRIM32,TMEM216,CEP290,ALMS1
GO Process	GO:0006996	Organelle organization	35	3450	0.47	3.03e-08	USH1C,CEP41,BBS2,MKKS,CEP164,BBS5,SHH,CEP120,IQCB1,TMEM107,PIBF1,BBS1,CLRN1,NPHP3,OFD1,KIAA0586,KIAA0753,AHI1,RPGRIP1L,MKS1,BBS10,ARL13B,CEP83,DYNC2H1,WDR19,MYO7A,C5orf42,TMEM67,CC2D2A,IFT74,IFT140,TRIM32,TMEM216,CEP290,ALMS1
GO Process	GO:0007603	Phototransduction, visible light	6	18	1.99	3.14e-08	CNGB1,PDE6A,ABCA4,AIPL1,CNGA1,PDE6B
GO Process	GO:0048592	Eye morphogenesis	10	151	1.29	3.21e-08	USH1C,TULP1,RPE65,ROM1,CRB1,AHI1,GLI3,MYO7A,CEP290,NR2E3
GO Process	GO:0050908	Detection of light stimulus involved in visual perception	6	19	1.96	3.88e-08	TULP1,CNGB1,RPE65,CRB1,BEST1,EYS
GO Process	GO:0007507	Heart development	15	522	0.92	4.92e-08	MKKS,BBS5,SHH,PTCH1,NPHP3,AHI1,RPGRIP1L,MKS1,ARL13B,GLI3,DYNC2H1,C5orf42,CC2D2A,IFT74,IFT140
GO Process	GO:0002009	Morphogenesis of an epithelium	14	435	0.97	4.99e-08	MKKS,BBS5,SHH,PTCH1,NPHP3,MYO9A,AHI1,RPGRIP1L,MKS1,ARL13B,GLI3,C5orf42,CC2D2A,CEP290
GO Process	GO:0007224	Smoothened signaling pathway	8	72	1.51	4.99e-08	SHH,PTCH1,KIAA0586,MKS1,ARL13B,GLI3,WDR19,CC2D2A
GO Process	GO:0021915	Neural tube development	10	160	1.26	5.04e-08	SHH,TMEM107,PTCH1,RPGRIP1L,MKS1,ARL13B,GLI3,WDR19,CC2D2A,IFT140
GO Process	GO:0051179	Localization	44	5591	0.36	6.13e-08	USH1C,CEP41,TULP1,BBS2,MKKS,CNGB1,CEP164,SLC45A1,BBS5,SHH,CEP120,USH2A,IQCB1,TMEM107,PIBF1,BBS1,CLRN1,PTCH1,NPHP3,OFD1,IMPDH1,KIAA0753,CRB1,AHI1,ABCA4,RPGRIP1L,MKS1,ARL13B,GLI3,CEP83,DYNC2H1,CDH23,WDR19,CNGA1,MYO7A,C5orf42,TMEM67,BEST1,CC2D2A,IFT74,IFT140,TMEM216,CEP290,ALMS1
GO Process	GO:0007602	Phototransduction	7	44	1.67	6.70e-08	CNGB1,PDE6A,ABCA4,AIPL1,CNGA1,PDE6B,NR2E3
GO Process	GO:0001754	Eye photoreceptor cell differentiation	7	46	1.65	8.65e-08	USH1C,TULP1,ROM1,CRB1,MYO7A,CEP290,NR2E3
GO Process	GO:0008589	Regulation of smoothened signaling pathway	8	87	1.43	1.80e-07	SHH,PTCH1,RPGRIP1L,MKS1,GLI3,DYNC2H1,IFT140,GPR161
GO Process	GO:0022400	Regulation of rhodopsin mediated signaling pathway	6	27	1.81	2.00e-07	CNGB1,GUCY2D,PDE6A,AIPL1,CNGA1,PDE6B
GO Process	GO:0009888	Tissue development	24	1760	0.6	2.69e-07	USH1C,BBS2,MKKS,BBS5,SHH,USH2A,TMEM107,CLRN1,PTCH1,NPHP3,MYO9A,AHI1,RPGRIP1L,MKS1,ARL13B,GLI3,WDR19,MYO7A,C5orf42,CC2D2A,IFT74,IFT140,EYS,CEP290
GO Process	GO:0048666	Neuron development	17	827	0.78	3.32e-07	USH1C,TULP1,CNGB1,RPE65,SHH,CLRN1,PTCH1,CRB1,AHI1,MKS1,GLI3,CDH23,MYO7A,IFT140,TRIM32,CEP290,NR2E3
GO Process	GO:0042592	Homeostatic process	23	1676	0.6	5.72e-07	USH1C,WFS1,TULP1,BBS2,MKKS,CNGB1,PDE6A,RPE65,USH2A,IQCB1,BBS1,CLRN1,PTCH1,NPHP3,CRB1,ABCA4,AIPL1,MKS1,BBS10,CDH23,TRIM32,PDE6B,RDH12
GO Process	GO:0042462	Eye photoreceptor cell development	6	34	1.71	6.35e-07	USH1C,TULP1,CRB1,MYO7A,CEP290,NR2E3
GO Process	GO:0060562	Epithelial tube morphogenesis	11	307	2023-02-01	1.37e-06	MKKS,BBS5,SHH,PTCH1,NPHP3,AHI1,MKS1,ARL13B,GLI3,CC2D2A,CEP290
GO Process	GO:0008104	Protein localization	25	2139	0.53	2.27e-06	USH1C,CEP41,TULP1,BBS2,CNGB1,BBS5,SHH,USH2A,TMEM107,PIBF1,BBS1,PTCH1,KIAA0753,CRB1,AHI1,ARL13B,CEP83,DYNC2H1,WDR19,MYO7A,C5orf42,CC2D2A,IFT74,IFT140,CEP290
GO Process	GO:0022008	Neurogenesis	22	1657	0.59	2.41e-06	USH1C,TULP1,CNGB1,RPE65,ROM1,SHH,CEP120,USH2A,CLRN1,PTCH1,MYO9A,CRB1,AHI1,MKS1,GLI3,DYNC2H1,CDH23,MYO7A,IFT140,TRIM32,CEP290,NR2E3
GO Process	GO:0033365	Protein localization to organelle	15	743	0.77	4.00e-06	TULP1,BBS2,CNGB1,SHH,TMEM107,PIBF1,BBS1,KIAA0753,ARL13B,CEP83,DYNC2H1,WDR19,C5orf42,CC2D2A,IFT140
GO Process	GO:0048699	Generation of neurons	21	1551	0.6	4.00e-06	USH1C,TULP1,CNGB1,RPE65,ROM1,SHH,USH2A,CLRN1,PTCH1,MYO9A,CRB1,AHI1,MKS1,GLI3,DYNC2H1,CDH23,MYO7A,IFT140,TRIM32,CEP290,NR2E3
GO Process	GO:0072359	Circulatory system development	16	872	0.73	4.61e-06	MKKS,ROM1,BBS5,SHH,PTCH1,NPHP3,AHI1,RPGRIP1L,MKS1,ARL13B,GLI3,DYNC2H1,C5orf42,CC2D2A,IFT74,IFT140
GO Process	GO:0050957	Equilibrioception	4	7	2.22	5.32e-06	USH1C,CLRN1,CDH23,MYO7A
GO Process	GO:0033036	Macromolecule localization	26	2473	0.49	8.45e-06	USH1C,CEP41,TULP1,BBS2,CNGB1,BBS5,SHH,USH2A,TMEM107,PIBF1,BBS1,PTCH1,KIAA0753,CRB1,AHI1,ABCA4,ARL13B,CEP83,DYNC2H1,WDR19,MYO7A,C5orf42,CC2D2A,IFT74,IFT140,CEP290
GO Process	GO:0060113	Inner ear receptor cell differentiation	6	56	2023-05-01	8.63e-06	USH1C,USH2A,CLRN1,MKS1,CDH23,MYO7A
GO Process	GO:0048468	Cell development	21	1629	0.58	8.73e-06	USH1C,TULP1,BBS2,MKKS,CNGB1,RPE65,SHH,CLRN1,PTCH1,CRB1,AHI1,MKS1,ARL13B,GLI3,CDH23,MYO7A,IFT74,IFT140,TRIM32,CEP290,NR2E3
GO Process	GO:0042733	Embryonic digit morphogenesis	6	61	1.46	1.35e-05	SHH,TMEM107,MKS1,GLI3,C5orf42,IFT140
GO Process	GO:0001947	Heart looping	6	64	1.44	1.72e-05	MKKS,BBS5,SHH,NPHP3,AHI1,ARL13B
GO Process	GO:0060122	Inner ear receptor cell stereocilium organization	5	31	1.67	1.72e-05	USH1C,CLRN1,MKS1,CDH23,MYO7A
GO Process	GO:0035295	Tube development	15	851	0.71	2.04e-05	MKKS,BBS5,SHH,TMEM107,PTCH1,NPHP3,AHI1,RPGRIP1L,MKS1,ARL13B,GLI3,WDR19,CC2D2A,IFT140,CEP290
GO Process	GO:0016056	Rhodopsin mediated signaling pathway	4	12	1.99	2.62e-05	CNGB1,PDE6A,CNGA1,PDE6B
GO Process	GO:0035845	Photoreceptor cell outer segment organization	4	12	1.99	2.62e-05	CNGB1,CRB1,AHI1,IFT140
GO Process	GO:0003002	Regionalization	10	332	0.94	2.71e-05	SHH,TMEM107,PTCH1,AHI1,RPGRIP1L,ARL13B,GLI3,DYNC2H1,WDR19,IFT140
GO Process	GO:0034613	Cellular protein localization	20	1610	0.56	3.23e-05	TULP1,BBS2,CNGB1,SHH,TMEM107,PIBF1,BBS1,PTCH1,KIAA0753,CRB1,AHI1,ARL13B,CEP83,DYNC2H1,WDR19,MYO7A,C5orf42,CC2D2A,IFT74,IFT140
GO Process	GO:0050896	Response to stimulus	48	8046	0.24	4.93e-05	CRX,WFS1,TULP1,PRPH2,BBS2,MKKS,CNGB1,GUCY2D,PDE6A,RPE65,RLBP1,ROM1,CEP164,BBS5,MITF,SHH,USH2A,BBS1,ZNF513,CLRN1,PTCH1,NPHP3,IMPDH1,KIAA0586,MYO9A,CRB1,AHI1,ABCA4,NMNAT1,AIPL1,MKS1,BBS10,ARL13B,GLI3,CDH23,WDR19,CNGA1,TMEM67,BEST1,CC2D2A,IFT74,TRIM32,PDE6B,EYS,GPR161,CEP290,RDH12,NR2E3
GO Process	GO:0001822	Kidney development	9	271	0.99	4.98e-05	WFS1,SHH,PTCH1,NPHP3,AHI1,RPGRIP1L,GLI3,C5orf42,CEP290
GO Process	GO:0009953	Dorsal/ventral pattern formation	6	83	1.32	6.37e-05	SHH,PTCH1,ARL13B,GLI3,DYNC2H1,WDR19
GO Process	GO:0021904	Dorsal/ventral neural tube patterning	4	17	1.84	7.60e-05	SHH,PTCH1,GLI3,WDR19
GO Process	GO:0008277	Regulation of g protein-coupled receptor signaling pathway	7	146	1.15	9.49e-05	CNGB1,GUCY2D,PDE6A,RPGRIP1L,AIPL1,CNGA1,PDE6B
GO Process	GO:0043473	Pigmentation	6	92	1.28	0.00011	BBS2,MKKS,BBS5,MITF,GLI3,MYO7A
GO Process	GO:0007605	Sensory perception of sound	7	153	1.13	0.00013	USH1C,WFS1,MKKS,USH2A,CLRN1,CDH23,MYO7A
GO Process	GO:0051904	Pigment granule transport	4	22	1.73	0.00018	BBS2,MKKS,BBS5,MYO7A
GO Process	GO:0048496	Maintenance of animal organ identity	3	5	2.24	0.00021	USH2A,IQCB1,NPHP3
GO Process	GO:0060042	Retina morphogenesis in camera-type eye	5	56	1.42	0.00021	USH1C,RPE65,ROM1,CRB1,AHI1
GO Process	GO:0060322	Head development	13	788	0.68	0.00026	BBS2,MKKS,SHH,CEP120,PTCH1,AHI1,RPGRIP1L,MKS1,ARL13B,GLI3,DYNC2H1,C5orf42,CEP290
GO Process	GO:0003007	Heart morphogenesis	8	251	0.97	0.00027	MKKS,BBS5,SHH,PTCH1,NPHP3,AHI1,MKS1,ARL13B
GO Process	GO:0003407	Neural retina development	5	62	1.37	0.00032	USH1C,RPE65,ROM1,CRB1,AHI1
GO Process	GO:0060831	Smoothened signaling pathway involved in dorsal/ventral neural tube patterning	3	7	2023-01-02	0.00043	PTCH1,GLI3,WDR19
GO Process	GO:0009987	Cellular process	65	15024	0.1	0.00045	USH1C,CRX,CEP41,WFS1,TULP1,PRPH2,BBS2,MKKS,CNGB1,GUCY2D,PDE6A,RPE65,RLBP1,ROM1,CEP164,SLC45A1,BBS5,MITF,SHH,CEP120,USH2A,IQCB1,TMEM107,PIBF1,BBS1,CLRN1,PTCH1,NPHP3,OFD1,IMPDH1,KIAA0586,MYO9A,DHDDS,KIAA0753,CRB1,AHI1,ABCA4,NMNAT1,RPGRIP1L,AIPL1,MKS1,BBS10,ARL13B,GLI3,CEP83,DYNC2H1,CDH23,WDR19,CNGA1,MYO7A,C5orf42,TMEM67,BEST1,CC2D2A,IFT74,IFT140,TRIM32,PDE6B,TMEM216,GPR161,CEP290,RDH12,RBP3,NR2E3,A…
GO Process	GO:0048593	Camera-type eye morphogenesis	6	121	1.16	0.00045	USH1C,RPE65,ROM1,CRB1,AHI1,GLI3
GO Process	GO:1904491	Protein localization to ciliary transition zone	3	8	2023-04-02	0.00058	TMEM107,C5orf42,CC2D2A
GO Process	GO:0009628	Response to abiotic stimulus	15	1147	0.58	0.00061	TULP1,MKKS,CNGB1,PDE6A,RPE65,PTCH1,CRB1,ABCA4,AIPL1,CNGA1,BEST1,TRIM32,PDE6B,EYS,NR2E3
GO Process	GO:0000086	G2/M transition of mitotic cell cycle	6	134	2023-12-01	0.00076	USH1C,CEP41,CEP164,OFD1,CEP290,ALMS1
GO Process	GO:0007420	Brain development	12	745	0.67	0.00078	BBS2,MKKS,SHH,CEP120,PTCH1,AHI1,RPGRIP1L,ARL13B,GLI3,DYNC2H1,C5orf42,CEP290
GO Process	GO:0021522	Spinal cord motor neuron differentiation	4	35	1.52	0.00084	SHH,PTCH1,GLI3,DYNC2H1
GO Process	GO:0035721	Intraciliary retrograde transport	3	10	1.94	0.00095	DYNC2H1,WDR19,IFT140
GO Process	GO:0006720	Isoprenoid metabolic process	6	142	2023-09-01	0.0010	RPE65,RLBP1,DHDDS,ABCA4,RDH12,RBP3
GO Process	GO:0030154	Cell differentiation	28	3702	0.34	0.0012	USH1C,CRX,TULP1,BBS2,MKKS,CNGB1,RPE65,ROM1,MITF,SHH,CEP120,USH2A,CLRN1,PTCH1,MYO9A,CRB1,AHI1,MKS1,ARL13B,GLI3,DYNC2H1,CDH23,MYO7A,IFT74,IFT140,TRIM32,CEP290,NR2E3
GO Process	GO:0060993	Kidney morphogenesis	5	84	1.24	0.0012	SHH,PTCH1,NPHP3,AHI1,GLI3
GO Process	GO:0035315	Hair cell differentiation	4	40	1.47	0.0013	USH1C,USH2A,CLRN1,MYO7A
GO Process	GO:0035735	Intraciliary transport involved in cilium assembly	4	40	1.47	0.0013	DYNC2H1,WDR19,IFT74,IFT140
GO Process	GO:0030902	Hindbrain development	6	154	2023-06-01	0.0015	SHH,AHI1,RPGRIP1L,ARL13B,C5orf42,CEP290
GO Process	GO:1990403	Embryonic brain development	3	13	1.83	0.0017	MKS1,CC2D2A,IFT140
GO Process	GO:0001738	Morphogenesis of a polarized epithelium	4	45	1.41	0.0020	MYO9A,AHI1,RPGRIP1L,C5orf42
GO Process	GO:0021537	Telencephalon development	7	257	0.9	0.0027	BBS2,MKKS,SHH,CEP120,RPGRIP1L,ARL13B,GLI3
GO Process	GO:0007017	Microtubule-based process	11	727	0.65	0.0030	BBS2,CEP120,PIBF1,NPHP3,OFD1,KIAA0753,DYNC2H1,WDR19,CC2D2A,IFT74,IFT140
GO Process	GO:0001523	Retinoid metabolic process	5	108	1.13	0.0034	RPE65,RLBP1,ABCA4,RDH12,RBP3
GO Process	GO:0099111	Microtubule-based transport	6	185	0.98	0.0038	NPHP3,OFD1,DYNC2H1,WDR19,IFT74,IFT140
GO Process	GO:0071482	Cellular response to light stimulus	5	113	2023-11-01	0.0041	CNGB1,PDE6A,CRB1,CNGA1,PDE6B
GO Process	GO:0030900	Forebrain development	8	387	0.78	0.0045	BBS2,MKKS,SHH,CEP120,RPGRIP1L,ARL13B,GLI3,DYNC2H1
GO Process	GO:0032402	Melanosome transport	3	21	1.62	0.0056	BBS2,MKKS,BBS5
GO Process	GO:0071539	Protein localization to centrosome	3	21	1.62	0.0056	PIBF1,KIAA0753,CEP83
GO Process	GO:0042471	Ear morphogenesis	5	123	2023-07-01	0.0058	USH1C,CLRN1,WDR19,MYO7A,CEP290
GO Process	GO:0072078	Nephron tubule morphogenesis	4	64	1.26	0.0064	SHH,PTCH1,AHI1,GLI3
GO Process	GO:0021544	Subpallium development	3	23	1.58	0.0069	BBS2,MKKS,GLI3
GO Process	GO:0048706	Embryonic skeletal system development	5	130	2023-05-01	0.0071	SHH,MKS1,GLI3,WDR19,IFT140
GO Process	GO:0044458	Motile cilium assembly	3	24	1.56	0.0074	BBS5,MKS1,CC2D2A
GO Process	GO:0061008	Hepaticobiliary system development	5	132	2023-04-01	0.0074	PTCH1,NPHP3,RPGRIP1L,MKS1,GLI3
GO Process	GO:0031175	Neuron projection development	10	680	0.63	0.0076	USH1C,TULP1,SHH,CLRN1,PTCH1,MKS1,GLI3,CDH23,MYO7A,TRIM32
GO Process	GO:0055123	Digestive system development	5	140	2023-02-01	0.0094	SHH,NPHP3,AHI1,GLI3,WDR19
GO Process	GO:0007018	Microtubule-based movement	7	334	0.79	0.0109	BBS2,NPHP3,OFD1,DYNC2H1,WDR19,IFT74,IFT140
GO Process	GO:0007468	Regulation of rhodopsin gene expression	2	4	2.16	0.0116	RPE65,NR2E3
GO Process	GO:0035148	Tube formation	5	147	1.0	0.0116	SHH,PTCH1,MKS1,CC2D2A,CEP290
GO Process	GO:0038108	Negative regulation of appetite by leptin-mediated signaling pathway	2	4	2.16	0.0116	BBS2,MKKS
GO Process	GO:0065001	Specification of axis polarity	2	4	2.16	0.0116	SHH,AHI1
GO Process	GO:0042491	Inner ear auditory receptor cell differentiation	3	31	1.45	0.0139	USH1C,CLRN1,MYO7A
GO Process	GO:0045879	Negative regulation of smoothened signaling pathway	3	34	1.41	0.0178	PTCH1,GLI3,GPR161
GO Process	GO:0009798	Axis specification	4	88	2023-12-01	0.0180	SHH,PTCH1,AHI1,ARL13B
GO Process	GO:0035137	Hindlimb morphogenesis	3	37	1.37	0.0221	SHH,PTCH1,RPGRIP1L
GO Process	GO:0051656	Establishment of organelle localization	7	385	0.73	0.0238	BBS2,MKKS,BBS5,CEP120,PIBF1,CEP83,MYO7A
GO Process	GO:0007442	Hindgut morphogenesis	2	7	1.92	0.0259	SHH,GLI3
GO Process	GO:0060296	Regulation of cilium beat frequency involved in ciliary motility	2	7	1.92	0.0259	BBS2,MKKS
GO Process	GO:0072203	Cell proliferation involved in metanephros development	2	7	1.92	0.0259	SHH,PTCH1
GO Process	GO:0051234	Establishment of localization	28	4479	0.26	0.0283	CEP41,TULP1,BBS2,MKKS,CNGB1,SLC45A1,BBS5,SHH,CEP120,USH2A,PIBF1,BBS1,NPHP3,OFD1,IMPDH1,AHI1,ABCA4,CEP83,DYNC2H1,CDH23,WDR19,CNGA1,MYO7A,BEST1,IFT74,IFT140,CEP290,ALMS1
GO Process	GO:0030850	Prostate gland development	3	42	1.32	0.0301	SHH,PTCH1,GLI3
GO Process	GO:0042472	Inner ear morphogenesis	4	103	2023-05-01	0.0302	USH1C,CLRN1,MYO7A,CEP290
GO Process	GO:0006776	Vitamin a metabolic process	2	8	1.86	0.0310	RPE65,RLBP1
GO Process	GO:0048793	Pronephros development	2	8	1.86	0.0310	AHI1,CEP290
GO Process	GO:0060027	Convergent extension involved in gastrulation	2	8	1.86	0.0310	MKKS,NPHP3
GO Process	GO:1901620	Regulation of smoothened signaling pathway involved in dorsal/ventral neural tube patterning	2	8	1.86	0.0310	MKS1,GPR161
GO Process	GO:0001658	Branching involved in ureteric bud morphogenesis	3	44	2023-03-01	0.0328	SHH,PTCH1,GLI3
GO Process	GO:0010824	Regulation of centrosome duplication	3	45	1.29	0.0347	CEP120,TMEM67,ALMS1
GO Process	GO:0008544	Epidermis development	7	419	0.69	0.0354	USH1C,SHH,USH2A,CLRN1,PTCH1,MYO7A,IFT74
GO Process	GO:0009605	Response to external stimulus	18	2310	0.36	0.0354	TULP1,BBS2,MKKS,CNGB1,PDE6A,RPE65,SHH,PTCH1,CRB1,ABCA4,AIPL1,GLI3,CNGA1,BEST1,TRIM32,PDE6B,EYS,NR2E3
GO Process	GO:0030705	Cytoskeleton-dependent intracellular transport	5	195	0.87	0.0354	DYNC2H1,WDR19,MYO7A,IFT74,IFT140
GO Process	GO:0014824	Artery smooth muscle contraction	2	9	1.81	0.0356	BBS2,MKKS
GO Process	GO:0010389	Regulation of g2/m transition of mitotic cell cycle	5	198	0.87	0.0369	CEP41,CEP164,OFD1,CEP290,ALMS1
GO Process	GO:0007166	Cell surface receptor signaling pathway	18	2325	0.35	0.0374	BBS2,MKKS,GUCY2D,PDE6A,RPE65,MITF,SHH,PTCH1,NPHP3,KIAA0586,AHI1,MKS1,ARL13B,GLI3,WDR19,CC2D2A,IFT74,PDE6B
GO Process	GO:0048546	Digestive tract morphogenesis	3	48	1.26	0.0398	SHH,AHI1,GLI3
GO Process	GO:0048701	Embryonic cranial skeleton morphogenesis	3	48	1.26	0.0398	GLI3,WDR19,IFT140
GO Process	GO:0021987	Cerebral cortex development	4	116	1.0	0.0414	BBS2,MKKS,CEP120,GLI3
GO Process	GO:0072205	Metanephric collecting duct development	2	10	1.77	0.0414	SHH,PTCH1
GO Process	GO:1903441	Protein localization to ciliary membrane	2	10	1.77	0.0414	ARL13B,WDR19
GO Process	GO:0071214	Cellular response to abiotic stimulus	6	313	0.75	0.0415	CNGB1,PDE6A,RPE65,CRB1,CNGA1,PDE6B
GO Process	GO:0009913	Epidermal cell differentiation	6	315	0.75	0.0425	USH1C,USH2A,CLRN1,PTCH1,MYO7A,IFT74
GO Process	GO:0000902	Cell morphogenesis	9	726	0.56	0.0453	SHH,CLRN1,PTCH1,CRB1,ARL13B,GLI3,CDH23,WDR19,MYO7A
GO Process	GO:0045060	Negative thymic t cell selection	2	11	1.73	0.0468	SHH,GLI3
GO Process	GO:0060287	Epithelial cilium movement involved in determination of left/right asymmetry	2	11	1.73	0.0468	NPHP3,OFD1
GO Molecular Function
GO Function	GO:0001103	RNA polymerase II repressing transcription factor binding	5	35	1.62	0.00077	BBS2,MKKS,BBS5,BBS1,BBS10
GO Function	GO:0005113	Patched binding	3	8	2023-04-02	0.0099	SHH,BBS1,PTCH1
GO Function	GO:0140297	DNA-binding transcription factor binding	8	366	0.81	0.0319	CRX,WFS1,BBS2,MKKS,BBS5,BBS1,BBS10,TRIM32
GO Function	GO:0061629	RNA polymerase II-specific DNA-binding transcription factor binding	7	283	0.86	0.0377	CRX,BBS2,MKKS,BBS5,BBS1,BBS10,TRIM32
GO Cellular Component
GO Component	GO:0005929	Cilium	43	637	1.29	3.25e-43	USH1C,CEP41,TULP1,PRPH2,BBS2,MKKS,CNGB1,GUCY2D,PDE6A,ROM1,CEP164,BBS5,USH2A,IQCB1,TMEM107,BBS1,PTCH1,NPHP3,OFD1,KIAA0586,AHI1,ABCA4,RPGRIP1L,MKS1,BBS10,ARL13B,GLI3,CEP83,DYNC2H1,WDR19,CNGA1,MYO7A,C5orf42,TMEM67,CC2D2A,IFT74,IFT140,PDE6B,EYS,TMEM216,GPR161,CEP290,ALMS1
GO Component	GO:0120025	Plasma membrane bounded cell projection	48	2193	0.81	8.24e-28	USH1C,CEP41,WFS1,TULP1,PRPH2,BBS2,MKKS,CNGB1,GUCY2D,PDE6A,ROM1,CEP164,BBS5,USH2A,IQCB1,TMEM107,BBS1,CLRN1,PTCH1,NPHP3,OFD1,KIAA0586,MYO9A,CRB1,AHI1,ABCA4,RPGRIP1L,MKS1,BBS10,ARL13B,GLI3,CEP83,DYNC2H1,CDH23,WDR19,CNGA1,MYO7A,C5orf42,TMEM67,CC2D2A,IFT74,IFT140,PDE6B,EYS,TMEM216,GPR161,CEP290,ALMS1
GO Component	GO:0097730	Non-motile cilium	21	160	1.58	2.11e-24	USH1C,TULP1,PRPH2,MKKS,CNGB1,GUCY2D,PDE6A,ROM1,USH2A,IQCB1,AHI1,ABCA4,RPGRIP1L,ARL13B,WDR19,CNGA1,MYO7A,IFT140,PDE6B,EYS,CEP290
GO Component	GO:0097731	9+0 non-motile cilium	19	133	1.62	1.45e-22	USH1C,TULP1,PRPH2,CNGB1,GUCY2D,PDE6A,ROM1,USH2A,IQCB1,ABCA4,RPGRIP1L,ARL13B,WDR19,CNGA1,MYO7A,IFT140,PDE6B,EYS,CEP290
GO Component	GO:0097733	Photoreceptor cell cilium	18	115	1.66	5.51e-22	USH1C,TULP1,PRPH2,CNGB1,GUCY2D,PDE6A,ROM1,USH2A,IQCB1,ABCA4,RPGRIP1L,WDR19,CNGA1,MYO7A,IFT140,PDE6B,EYS,CEP290
GO Component	GO:0001750	Photoreceptor outer segment	15	88	2023-07-01	1.46e-18	USH1C,TULP1,PRPH2,CNGB1,GUCY2D,PDE6A,ROM1,IQCB1,ABCA4,WDR19,CNGA1,MYO7A,IFT140,PDE6B,EYS
GO Component	GO:0035869	Ciliary transition zone	14	66	1.79	1.84e-18	USH2A,IQCB1,TMEM107,AHI1,RPGRIP1L,MKS1,WDR19,MYO7A,C5orf42,TMEM67,CC2D2A,IFT140,TMEM216,CEP290
GO Component	GO:0005815	Microtubule organizing center	24	761	0.96	7.12e-15	CEP41,BBS2,MKKS,RLBP1,CEP164,BBS5,CEP120,USH2A,IQCB1,PIBF1,BBS1,OFD1,KIAA0586,KIAA0753,AHI1,RPGRIP1L,MKS1,CEP83,TMEM67,IFT74,IFT140,EYS,CEP290,ALMS1
GO Component	GO:0036064	Ciliary basal body	13	134	1.45	4.13e-13	CEP41,BBS2,MKKS,BBS5,USH2A,BBS1,OFD1,KIAA0586,AHI1,RPGRIP1L,MKS1,IFT140,CEP290
GO Component	GO:0005856	Cytoskeleton	34	2221	0.65	4.18e-13	USH1C,CEP41,BBS2,MKKS,RLBP1,CEP164,BBS5,CEP120,USH2A,IQCB1,PIBF1,BBS1,CLRN1,OFD1,KIAA0586,MYO9A,KIAA0753,AHI1,RPGRIP1L,MKS1,ARL13B,GLI3,CEP83,DYNC2H1,WDR19,MYO7A,TMEM67,CC2D2A,IFT74,IFT140,EYS,TMEM216,CEP290,ALMS1
GO Component	GO:0060170	Ciliary membrane	11	72	1.65	5.83e-13	BBS2,CNGB1,GUCY2D,ROM1,BBS5,BBS1,PTCH1,ARL13B,CNGA1,TMEM67,GPR161
GO Component	GO:0015630	Microtubule cytoskeleton	26	1219	0.79	1.58e-12	CEP41,BBS2,MKKS,RLBP1,CEP164,BBS5,CEP120,USH2A,IQCB1,PIBF1,BBS1,CLRN1,OFD1,KIAA0586,KIAA0753,AHI1,RPGRIP1L,MKS1,CEP83,DYNC2H1,TMEM67,IFT74,IFT140,EYS,CEP290,ALMS1
GO Component	GO:0005813	Centrosome	19	565	0.99	5.74e-12	CEP41,MKKS,RLBP1,CEP164,CEP120,IQCB1,PIBF1,BBS1,OFD1,KIAA0586,KIAA0753,AHI1,RPGRIP1L,MKS1,TMEM67,IFT74,IFT140,CEP290,ALMS1
GO Component	GO:0005814	Centriole	12	142	1.39	1.65e-11	CEP41,CEP164,CEP120,IQCB1,OFD1,KIAA0586,KIAA0753,AHI1,MKS1,CEP83,IFT140,CEP290
GO Component	GO:0036038	MKS complex	7	13	2023-02-02	3.10e-11	TMEM107,AHI1,MKS1,TMEM67,CC2D2A,TMEM216,CEP290
GO Component	GO:0001917	Photoreceptor inner segment	9	57	1.66	1.14e-10	USH1C,TULP1,PRPH2,USH2A,KIAA0586,CRB1,AIPL1,MYO7A,RDH12
GO Component	GO:0043005	Neuron projection	25	1366	0.73	1.28e-10	USH1C,WFS1,TULP1,PRPH2,BBS2,MKKS,CNGB1,GUCY2D,PDE6A,ROM1,USH2A,IQCB1,CLRN1,PTCH1,MYO9A,ABCA4,RPGRIP1L,CDH23,WDR19,CNGA1,MYO7A,IFT140,PDE6B,EYS,CEP290
GO Component	GO:0032391	Photoreceptor connecting cilium	7	38	1.73	1.43e-08	USH2A,IQCB1,RPGRIP1L,WDR19,MYO7A,IFT140,CEP290
GO Component	GO:0031253	Cell projection membrane	12	338	2023-02-01	1.80e-07	BBS2,CNGB1,GUCY2D,ROM1,BBS5,USH2A,BBS1,PTCH1,ARL13B,CNGA1,TMEM67,GPR161
GO Component	GO:0032421	Stereocilium bundle	7	58	1.55	1.88e-07	USH1C,BBS2,MKKS,USH2A,CLRN1,CDH23,MYO7A
GO Component	GO:0032420	Stereocilium	6	53	1.52	3.79e-06	USH1C,BBS2,USH2A,CLRN1,CDH23,MYO7A
GO Component	GO:0043226	Organelle	64	13515	0.14	6.28e-06	USH1C,CRX,CEP41,WFS1,TULP1,PRPH2,BBS2,MKKS,CNGB1,GUCY2D,PDE6A,RPE65,RLBP1,ROM1,CEP164,BBS5,MITF,SHH,CEP120,USH2A,IQCB1,TMEM107,PIBF1,BBS1,ZNF513,CLRN1,PTCH1,NPHP3,OFD1,IMPDH1,KIAA0586,MYO9A,DHDDS,KIAA0753,AHI1,ABCA4,NMNAT1,RPGRIP1L,AIPL1,MKS1,BBS10,ARL13B,GLI3,CEP83,DYNC2H1,CDH23,WDR19,CNGA1,MYO7A,C5orf42,TMEM67,CC2D2A,IFT74,IFT140,TRIM32,PDE6B,EYS,TMEM216,GPR161,CEP290,RDH12,RBP3,NR2E3,ALMS1
GO Component	GO:0043232	Intracellular non-membrane-bounded organelle	37	4880	0.35	8.96e-06	USH1C,CRX,CEP41,BBS2,MKKS,RLBP1,CEP164,BBS5,MITF,CEP120,USH2A,IQCB1,PIBF1,BBS1,CLRN1,OFD1,KIAA0586,MYO9A,KIAA0753,AHI1,RPGRIP1L,MKS1,ARL13B,GLI3,CEP83,DYNC2H1,WDR19,MYO7A,TMEM67,CC2D2A,IFT74,IFT140,TRIM32,EYS,TMEM216,CEP290,ALMS1
GO Component	GO:0097542	Ciliary tip	5	46	2023-05-01	5.41e-05	GLI3,DYNC2H1,WDR19,IFT74,IFT140
GO Component	GO:0097381	Photoreceptor disc membrane	4	24	1.69	0.00014	GUCY2D,PDE6A,ABCA4,PDE6B
GO Component	GO:0098590	Plasma membrane region	16	1219	0.58	0.00017	BBS2,CNGB1,GUCY2D,ROM1,BBS5,USH2A,BBS1,PTCH1,CRB1,ARL13B,CNGA1,MYO7A,TMEM67,BEST1,GPR161,RDH12
GO Component	GO:0005930	Axoneme	6	117	1.18	0.00022	BBS1,RPGRIP1L,ARL13B,GLI3,DYNC2H1,IFT140
GO Component	GO:0002139	Stereocilia coupling link	3	7	2023-01-02	0.00024	USH1C,USH2A,MYO7A
GO Component	GO:0034464	BBSome	3	8	2023-04-02	0.00032	BBS2,BBS5,BBS1
GO Component	GO:0098858	Actin-based cell projection	7	214	0.98	0.00051	USH1C,BBS2,USH2A,CLRN1,CRB1,CDH23,MYO7A
GO Component	GO:0005902	Microvillus	5	86	1.23	0.00072	USH1C,BBS2,CLRN1,CRB1,MYO7A
GO Component	GO:0042622	Photoreceptor outer segment membrane	3	15	1.77	0.0014	GUCY2D,ROM1,CNGA1
GO Component	GO:0031514	Motile cilium	6	194	0.96	0.0028	BBS2,MKKS,ARL13B,DYNC2H1,WDR19,IFT74
GO Component	GO:0030990	Intraciliary transport particle	3	26	1.53	0.0057	WDR19,IFT74,IFT140
GO Component	GO:0002142	Stereocilia ankle link complex	2	6	1.99	0.0131	USH1C,USH2A
GO Component	GO:0033165	Interphotoreceptor matrix	2	6	1.99	0.0131	EYS,RBP3
GO Component	GO:0034451	Centriolar satellite	4	95	2023-09-01	0.0141	PIBF1,OFD1,KIAA0753,CEP290
GO Component	GO:0030991	Intraciliary transport particle a	2	7	1.92	0.0154	WDR19,IFT140
GO Component	GO:0016461	Unconventional myosin complex	2	10	1.77	0.0274	MYO9A,MYO7A
GO Component	GO:0097539	Ciliary transition fiber	2	10	1.77	0.0274	CEP164,CEP83
Reactome
Reactome	HSA-5617833	Cilium Assembly	25	197	1.57	1.30e-28	CEP41,BBS2,MKKS,CNGB1,CEP164,BBS5,IQCB1,BBS1,NPHP3,OFD1,AHI1,RPGRIP1L,MKS1,BBS10,ARL13B,CEP83,DYNC2H1,WDR19,TMEM67,CC2D2A,IFT74,IFT140,TMEM216,CEP290,ALMS1
Reactome	HSA-5620912	Anchoring of the basal body to the plasma membrane	13	97	1.59	3.69e-14	CEP41,CEP164,IQCB1,OFD1,AHI1,RPGRIP1L,MKS1,CEP83,TMEM67,CC2D2A,TMEM216,CEP290,ALMS1
Reactome	HSA-2187338	Visual phototransduction	11	99	1.51	5.50e-11	CNGB1,GUCY2D,PDE6A,RPE65,RLBP1,ABCA4,CNGA1,MYO7A,PDE6B,RDH12,RBP3
Reactome	HSA-5620920	Cargo trafficking to the periciliary membrane	8	50	1.67	8.69e-09	BBS2,MKKS,CNGB1,BBS5,BBS1,NPHP3,BBS10,ARL13B
Reactome	HSA-5358351	Signaling by Hedgehog	10	146	2023-03-01	4.57e-08	SHH,PTCH1,OFD1,RPGRIP1L,MKS1,GLI3,DYNC2H1,WDR19,IFT140,GPR161
Reactome	HSA-5610787	Hedgehog off state	9	110	1.38	8.03e-08	PTCH1,OFD1,RPGRIP1L,MKS1,GLI3,DYNC2H1,WDR19,IFT140,GPR161
Reactome	HSA-2453902	The canonical retinoid cycle in rods (twilight vision)	6	23	1.88	1.52e-07	RPE65,RLBP1,ABCA4,MYO7A,RDH12,RBP3
Reactome	HSA-5620922	BBSome-mediated cargo-targeting to cilium	5	22	1.82	7.31e-06	BBS2,MKKS,BBS5,BBS1,BBS10
Reactome	HSA-2485179	Activation of the phototransduction cascade	4	11	2023-03-02	3.25e-05	CNGB1,PDE6A,CNGA1,PDE6B
Reactome	HSA-2514859	Inactivation, recovery and regulation of the phototransduction cascade	5	33	1.65	3.31e-05	CNGB1,GUCY2D,PDE6A,CNGA1,PDE6B
Reactome	HSA-380259	Loss of Nlp from mitotic centrosomes	5	69	1.33	0.00083	CEP41,CEP164,OFD1,CEP290,ALMS1
Reactome	HSA-8854518	AURKA Activation by TPX2	5	72	1.31	0.00088	CEP41,CEP164,OFD1,CEP290,ALMS1
Reactome	HSA-380270	Recruitment of mitotic centrosome proteins and complexes	5	80	1.26	0.0013	CEP41,CEP164,OFD1,CEP290,ALMS1
Reactome	HSA-2453864	Retinoid cycle disease events	3	12	1.86	0.0018	RLBP1,ABCA4,RDH12
Reactome	HSA-2565942	Regulation of PLK1 Activity at G2/M Transition	5	87	1.22	0.0018	CEP41,CEP164,OFD1,CEP290,ALMS1
Reactome	HSA-380320	Recruitment of NuMA to mitotic centrosomes	5	93	2023-02-01	0.0020	CEP41,CEP164,OFD1,CEP290,ALMS1
Reactome	HSA-5620924	Intraflagellar transport	4	51	1.36	0.0034	DYNC2H1,WDR19,IFT74,IFT140
Reactome	HSA-162582	Signal Transduction	22	2741	0.37	0.0066	CNGB1,GUCY2D,PDE6A,RPE65,RLBP1,SHH,PTCH1,OFD1,MYO9A,ABCA4,RPGRIP1L,MKS1,GLI3,DYNC2H1,WDR19,CNGA1,MYO7A,IFT140,PDE6B,GPR161,RDH12,RBP3
Reactome	HSA-372790	Signaling by GPCR	13	1166	0.51	0.0126	CNGB1,GUCY2D,PDE6A,RPE65,RLBP1,SHH,PTCH1,ABCA4,CNGA1,MYO7A,PDE6B,RDH12,RBP3
Reactome	HSA-5632684	Hedgehog on state	4	83	1.15	0.0179	SHH,PTCH1,GLI3,GPR161
Reactome	HSA-2187335	The retinoid cycle in cones (daylight vision)	2	6	1.99	0.0246	RLBP1,RBP3
Reactome	HSA-5632681	Ligand-receptor interactions	2	8	1.86	0.0380	SHH,PTCH1

## Sheet: Enrichment subnetwork4 seizure 
#category	term ID	term description	observed gene count	background gene count	strength	false discovery rate	matching proteins in your network (labels)
GO Biological Process
GO Process	GO:0019752	Carboxylic acid metabolic process	34	853	1.15	4.48e-28	OTC,ACO2,GCDH,ACADS,LIAS,DHTKD1,CAD,SDHA,MCCC1,ASL,PDHB,ACAD9,ALDH5A1,UPB1,HADHB,HPDL,MCCC2,FH,ACADSB,PHGDH,DBT,DPYD,ACADM,ASS1,UGT1A1,ALDOB,HADHA,GLDC,PC,ACY1,PYCR1,ALDH7A1,IVD,ACSF3
GO Process	GO:0044281	Small molecule metabolic process	37	1684	0.89	5.26e-23	OTC,ACO2,GCDH,UMPS,ACADS,LIAS,DHTKD1,CAD,SDHA,MCCC1,NDUFA9,ASL,PDHB,ACAD9,ALDH5A1,UPB1,HADHB,HPDL,MCCC2,FH,ACADSB,PHGDH,DBT,DPYD,ACADM,ASS1,UGT1A1,ALDOB,HADHA,GLDC,PC,ACY1,PYCR1,ALDH7A1,IVD,ACSF3,ADSL
GO Process	GO:0055114	Oxidation-reduction process	29	939	2023-04-01	2.25e-20	ACO2,GCDH,NDUFS7,NDUFB3,ACADS,COX10,DHTKD1,SDHA,NDUFA9,PDHB,ACAD9,ALDH5A1,HADHB,HPDL,FH,NDUFS2,ACADSB,PHGDH,DPYD,ACADM,SURF1,ALDOB,COX4I2,HADHA,GLDC,PYCR1,ALDH7A1,IVD,ADSL
GO Process	GO:0006520	Cellular amino acid metabolic process	19	278	1.39	5.44e-18	OTC,GCDH,CAD,MCCC1,ASL,ALDH5A1,UPB1,HPDL,MCCC2,ACADSB,PHGDH,DBT,DPYD,ASS1,GLDC,ACY1,PYCR1,ALDH7A1,IVD
GO Process	GO:0044282	Small molecule catabolic process	18	424	1.18	1.95e-13	OTC,GCDH,ACADS,MCCC1,ALDH5A1,UPB1,HADHB,MCCC2,ACADSB,DBT,DPYD,ACADM,ALDOB,HADHA,GLDC,ALDH7A1,IVD,ACSF3
GO Process	GO:0032787	Monocarboxylic acid metabolic process	19	515	2023-12-01	2.42e-13	GCDH,ACADS,LIAS,DHTKD1,MCCC1,PDHB,ACAD9,ALDH5A1,HADHB,MCCC2,ACADSB,PHGDH,ACADM,UGT1A1,ALDOB,HADHA,PC,IVD,ACSF3
GO Process	GO:0046395	Carboxylic acid catabolic process	15	260	1.31	1.11e-12	OTC,GCDH,ACADS,MCCC1,ALDH5A1,HADHB,MCCC2,ACADSB,DBT,ACADM,HADHA,GLDC,ALDH7A1,IVD,ACSF3
GO Process	GO:0045333	Cellular respiration	13	158	1.47	1.30e-12	ACO2,NDUFS7,NDUFB3,COX10,DHTKD1,SDHA,NDUFA9,PDHB,FH,NDUFS2,SURF1,COX4I2,ADSL
GO Process	GO:1901605	Alpha-amino acid metabolic process	13	191	1.38	1.20e-11	OTC,GCDH,CAD,MCCC1,ASL,ALDH5A1,MCCC2,PHGDH,ASS1,GLDC,PYCR1,ALDH7A1,IVD
GO Process	GO:0033108	Mitochondrial respiratory chain complex assembly	11	102	1.58	1.34e-11	NDUFS7,NDUFB3,SCO1,NDUFA9,NUBPL,ACAD9,NDUFAF3,TMEM126B,NDUFS2,SURF1,BCS1L
GO Process	GO:0006091	Generation of precursor metabolites and energy	16	405	1.15	1.93e-11	ACO2,NDUFS7,NDUFB3,COX10,DHTKD1,SDHA,NDUFA9,PDHB,FH,NDUFS2,PHGDH,SURF1,ALDOB,COX4I2,GLDC,ADSL
GO Process	GO:0009060	Aerobic respiration	10	79	1.65	4.65e-11	ACO2,NDUFS7,COX10,DHTKD1,SDHA,PDHB,FH,SURF1,COX4I2,ADSL
GO Process	GO:0032981	Mitochondrial respiratory chain complex i assembly	9	66	1.69	4.43e-10	NDUFS7,NDUFB3,NDUFA9,NUBPL,ACAD9,NDUFAF3,TMEM126B,NDUFS2,BCS1L
GO Process	GO:0044237	Cellular metabolic process	47	7513	0.35	5.94e-10	OTC,ACO2,GCDH,UMPS,NDUFS7,NDUFB3,ACADS,LIAS,COX10,DHTKD1,CAD,SDHA,MCCC1,NDUFA9,POLG,NUBPL,ASL,PDHB,ACAD9,ALDH5A1,UPB1,HADHB,HPDL,MCCC2,FH,SERAC1,NDUFS2,ACADSB,PHGDH,DBT,DPYD,ACADM,SURF1,ASS1,UGT1A1,ALDOB,COX4I2,HADHA,GLDC,LIPT1,PC,ACY1,PYCR1,ALDH7A1,IVD,ACSF3,ADSL
GO Process	GO:0009063	Cellular amino acid catabolic process	10	124	1.46	2.27e-09	OTC,GCDH,MCCC1,ALDH5A1,MCCC2,ACADSB,DBT,GLDC,ALDH7A1,IVD
GO Process	GO:0008652	Cellular amino acid biosynthetic process	8	75	1.58	4.39e-08	OTC,CAD,ASL,UPB1,PHGDH,DPYD,ASS1,PYCR1
GO Process	GO:0022900	Electron transport chain	10	174	1.31	4.67e-08	NDUFS7,NDUFB3,COX10,SDHA,NDUFA9,NDUFS2,PHGDH,SURF1,COX4I2,GLDC
GO Process	GO:0007005	Mitochondrion organization	13	452	2023-01-01	1.97e-07	NDUFS7,NDUFB3,SCO1,COX10,NDUFA9,NUBPL,TMEM70,ACAD9,NDUFAF3,TMEM126B,NDUFS2,SURF1,BCS1L
GO Process	GO:0046034	ATP metabolic process	10	204	1.24	1.97e-07	NDUFS7,NDUFB3,COX10,DHTKD1,SDHA,NDUFA9,NDUFS2,SURF1,ALDOB,COX4I2
GO Process	GO:0044283	Small molecule biosynthetic process	14	572	0.94	2.68e-07	OTC,UMPS,LIAS,CAD,NDUFA9,ASL,UPB1,PHGDH,DPYD,ASS1,ALDOB,PC,PYCR1,ACSF3
GO Process	GO:0006631	Fatty acid metabolic process	11	311	2023-01-01	5.87e-07	GCDH,ACADS,LIAS,ACAD9,HADHB,ACADSB,ACADM,UGT1A1,HADHA,IVD,ACSF3
GO Process	GO:0009064	Glutamine family amino acid metabolic process	7	69	1.56	7.91e-07	OTC,CAD,ASL,ALDH5A1,PHGDH,ASS1,PYCR1
GO Process	GO:0006119	Oxidative phosphorylation	8	118	1.38	9.68e-07	NDUFS7,NDUFB3,COX10,SDHA,NDUFA9,NDUFS2,SURF1,COX4I2
GO Process	GO:0034622	Cellular protein-containing complex assembly	15	816	0.82	2.33e-06	NDUFS7,NDUFB3,SCO1,COX10,NDUFA9,NUBPL,TMEM70,ACAD9,NDUFAF3,TMEM126B,NDUFS2,SURF1,ALDOB,DHX30,BCS1L
GO Process	GO:0042775	Mitochondrial atp synthesis coupled electron transport	7	87	1.46	3.22e-06	NDUFS7,NDUFB3,COX10,SDHA,NDUFA9,NDUFS2,COX4I2
GO Process	GO:0046394	Carboxylic acid biosynthetic process	10	290	2023-09-01	3.73e-06	OTC,LIAS,CAD,ASL,UPB1,PHGDH,DPYD,ASS1,PYCR1,ACSF3
GO Process	GO:0009083	Branched-chain amino acid catabolic process	5	22	1.91	4.06e-06	MCCC1,MCCC2,ACADSB,DBT,IVD
GO Process	GO:0006635	Fatty acid beta-oxidation	6	56	1.58	6.93e-06	GCDH,ACADS,HADHB,ACADM,HADHA,IVD
GO Process	GO:1901606	Alpha-amino acid catabolic process	7	104	1.38	8.20e-06	OTC,GCDH,MCCC1,MCCC2,GLDC,ALDH7A1,IVD
GO Process	GO:1901607	Alpha-amino acid biosynthetic process	6	58	1.57	8.20e-06	OTC,CAD,ASL,PHGDH,ASS1,PYCR1
GO Process	GO:1901575	Organic substance catabolic process	20	1750	0.61	8.44e-06	OTC,GCDH,ACADS,DHTKD1,MCCC1,ALDH5A1,UPB1,HADHB,MCCC2,ACADSB,DBT,DPYD,ACADM,UGT1A1,ALDOB,HADHA,GLDC,ALDH7A1,IVD,ACSF3
GO Process	GO:0033539	Fatty acid beta-oxidation using acyl-coa dehydrogenase	4	10	2.15	1.66e-05	GCDH,ACADS,ACADM,IVD
GO Process	GO:0065003	Protein-containing complex assembly	17	1293	0.67	1.69e-05	NDUFS7,NDUFB3,SCO1,COX10,NDUFA9,NUBPL,TMEM70,ACAD9,NDUFAF3,UPB1,TMEM126B,NDUFS2,SURF1,ALDOB,GLDC,DHX30,BCS1L
GO Process	GO:0072329	Monocarboxylic acid catabolic process	7	118	1.32	1.69e-05	GCDH,ACADS,ALDH5A1,HADHB,ACADM,HADHA,IVD
GO Process	GO:0006099	Tricarboxylic acid cycle	5	34	1.72	2.20e-05	ACO2,DHTKD1,SDHA,PDHB,FH
GO Process	GO:0000050	Urea cycle	4	12	2023-07-02	2.74e-05	OTC,ASL,FH,ASS1
GO Process	GO:1901566	Organonitrogen compound biosynthetic process	17	1346	0.65	2.74e-05	OTC,GCDH,UMPS,COX10,CAD,ASL,PDHB,UPB1,FH,PHGDH,DPYD,ACADM,ASS1,PYCR1,ALDH7A1,ACSF3,ADSL
GO Process	GO:0055086	Nucleobase-containing small molecule metabolic process	11	508	0.89	4.12e-05	GCDH,UMPS,DHTKD1,CAD,PDHB,UPB1,MCCC2,DPYD,ALDOB,ACSF3,ADSL
GO Process	GO:0071704	Organic substance metabolic process	41	7755	0.27	4.12e-05	OTC,ACO2,GCDH,UMPS,ACADS,LIAS,COX10,DHTKD1,CAD,SDHA,MCCC1,NDUFA9,POLG,ASL,PDHB,ACAD9,ALDH5A1,UPB1,HADHB,HPDL,MCCC2,FH,SERAC1,ACADSB,PHGDH,DBT,DPYD,ACADM,ASS1,UGT1A1,ALDOB,HADHA,GLDC,LIPT1,PC,ACY1,PYCR1,ALDH7A1,IVD,ACSF3,ADSL
GO Process	GO:0009084	Glutamine family amino acid biosynthetic process	4	16	1.95	6.16e-05	OTC,ASL,ASS1,PYCR1
GO Process	GO:0009259	Ribonucleotide metabolic process	9	318	1.0	6.73e-05	GCDH,UMPS,DHTKD1,CAD,PDHB,MCCC2,ALDOB,ACSF3,ADSL
GO Process	GO:1901576	Organic substance biosynthetic process	23	2734	0.48	9.69e-05	OTC,GCDH,UMPS,LIAS,COX10,CAD,NDUFA9,POLG,ASL,PDHB,UPB1,FH,SERAC1,PHGDH,DPYD,ACADM,ASS1,ALDOB,PC,PYCR1,ALDH7A1,ACSF3,ADSL
GO Process	GO:0006796	Phosphate-containing compound metabolic process	20	2107	0.53	0.00011	GCDH,UMPS,NDUFS7,NDUFB3,COX10,DHTKD1,CAD,SDHA,NDUFA9,PDHB,HADHB,MCCC2,SERAC1,NDUFS2,SURF1,ALDOB,COX4I2,HADHA,ACSF3,ADSL
GO Process	GO:0009987	Cellular process	55	15024	0.11	0.00011	OTC,ACO2,GCDH,UMPS,NDUFS7,NDUFB3,ACADS,SCO1,LRPPRC,LIAS,COX10,DHTKD1,CAD,SDHA,MCCC1,NDUFA9,POLG,NUBPL,CLPB,ASL,PDHB,TMEM70,ACAD9,ALDH5A1,NDUFAF3,UPB1,HADHB,HPDL,MCCC2,TMEM126B,FH,SERAC1,NDUFS2,ACADSB,PHGDH,DBT,DPYD,ACADM,SURF1,ASS1,UGT1A1,ALDOB,COX4I2,HADHA,GLDC,LIPT1,PC,ACY1,PYCR1,ALDH7A1,DHX30,BCS1L,IVD,ACSF3,ADSL
GO Process	GO:0044238	Primary metabolic process	39	7332	0.28	0.00011	OTC,ACO2,GCDH,UMPS,ACADS,LIAS,DHTKD1,CAD,SDHA,MCCC1,POLG,ASL,PDHB,ACAD9,ALDH5A1,UPB1,HADHB,HPDL,MCCC2,FH,SERAC1,ACADSB,PHGDH,DBT,DPYD,ACADM,ASS1,UGT1A1,ALDOB,HADHA,GLDC,LIPT1,PC,ACY1,PYCR1,ALDH7A1,IVD,ACSF3,ADSL
GO Process	GO:0006526	Arginine biosynthetic process	3	4	2.43	0.00014	OTC,ASL,ASS1
GO Process	GO:0006790	Sulfur compound metabolic process	9	355	0.96	0.00014	GCDH,LIAS,MCCC1,NUBPL,PDHB,MCCC2,PHGDH,PC,ACSF3
GO Process	GO:0044248	Cellular catabolic process	18	1758	0.56	0.00016	OTC,GCDH,ACADS,MCCC1,ALDH5A1,UPB1,HADHB,MCCC2,ACADSB,DBT,DPYD,ACADM,UGT1A1,HADHA,GLDC,ALDH7A1,IVD,ACSF3
GO Process	GO:1901564	Organonitrogen compound metabolic process	32	5244	0.34	0.00019	OTC,GCDH,UMPS,LIAS,COX10,DHTKD1,CAD,MCCC1,ASL,PDHB,ALDH5A1,UPB1,HPDL,MCCC2,FH,ACADSB,PHGDH,DBT,DPYD,ACADM,ASS1,UGT1A1,ALDOB,GLDC,LIPT1,PC,ACY1,PYCR1,ALDH7A1,IVD,ACSF3,ADSL
GO Process	GO:0008535	Respiratory chain complex iv assembly	4	26	1.74	0.00026	SCO1,COX10,SURF1,BCS1L
GO Process	GO:0006552	Leucine catabolic process	3	6	2.25	0.00031	MCCC1,MCCC2,IVD
GO Process	GO:0000052	Citrulline metabolic process	3	7	2.18	0.00044	OTC,CAD,ASS1
GO Process	GO:0034641	Cellular nitrogen compound metabolic process	24	3282	0.42	0.00050	OTC,GCDH,UMPS,LIAS,COX10,DHTKD1,CAD,MCCC1,POLG,ASL,PDHB,UPB1,MCCC2,FH,DPYD,ACADM,ASS1,UGT1A1,ALDOB,LIPT1,PC,ALDH7A1,ACSF3,ADSL
GO Process	GO:0044249	Cellular biosynthetic process	21	2611	0.46	0.00063	OTC,GCDH,UMPS,LIAS,COX10,CAD,NDUFA9,POLG,ASL,PDHB,UPB1,FH,SERAC1,PHGDH,DPYD,ACADM,ASS1,PYCR1,ALDH7A1,ACSF3,ADSL
GO Process	GO:0006629	Lipid metabolic process	14	1190	0.62	0.00066	GCDH,ACADS,LIAS,ACAD9,HADHB,SERAC1,ACADSB,ACADM,UGT1A1,HADHA,LIPT1,PC,IVD,ACSF3
GO Process	GO:0006768	Biotin metabolic process	3	9	2023-07-02	0.00073	MCCC1,MCCC2,PC
GO Process	GO:0006213	Pyrimidine nucleoside metabolic process	4	36	2023-06-01	0.00075	UMPS,CAD,UPB1,DPYD
GO Process	GO:0019637	Organophosphate metabolic process	12	870	0.69	0.00075	GCDH,UMPS,DHTKD1,CAD,PDHB,HADHB,MCCC2,SERAC1,ALDOB,HADHA,ACSF3,ADSL
GO Process	GO:0009260	Ribonucleotide biosynthetic process	6	160	1.13	0.0011	GCDH,UMPS,CAD,PDHB,ACSF3,ADSL
GO Process	GO:1901565	Organonitrogen compound catabolic process	13	1070	0.64	0.0011	OTC,GCDH,MCCC1,ALDH5A1,UPB1,MCCC2,ACADSB,DBT,DPYD,UGT1A1,GLDC,ALDH7A1,IVD
GO Process	GO:0043648	Dicarboxylic acid metabolic process	5	93	1.28	0.0012	SDHA,ALDH5A1,FH,ASS1,ACSF3
GO Process	GO:0072521	Purine-containing compound metabolic process	8	360	0.9	0.0012	GCDH,DHTKD1,PDHB,MCCC2,DPYD,ALDOB,ACSF3,ADSL
GO Process	GO:0044255	Cellular lipid metabolic process	12	939	0.66	0.0015	GCDH,ACADS,LIAS,ACAD9,HADHB,SERAC1,ACADSB,ACADM,UGT1A1,HADHA,IVD,ACSF3
GO Process	GO:0006120	Mitochondrial electron transport, nadh to ubiquinone	4	49	1.46	0.0021	NDUFS7,NDUFB3,NDUFA9,NDUFS2
GO Process	GO:0009066	Aspartate family amino acid metabolic process	4	50	1.45	0.0022	GCDH,PHGDH,ASS1,ALDH7A1
GO Process	GO:0006206	Pyrimidine nucleobase metabolic process	3	16	1.82	0.0028	UMPS,CAD,DPYD
GO Process	GO:0009150	Purine ribonucleotide metabolic process	7	303	0.91	0.0033	GCDH,DHTKD1,PDHB,MCCC2,ALDOB,ACSF3,ADSL
GO Process	GO:0001889	Liver development	5	129	1.14	0.0049	OTC,ACO2,CAD,ASS1,UGT1A1
GO Process	GO:0019483	Beta-alanine biosynthetic process	2	2	2.55	0.0060	UPB1,DPYD
GO Process	GO:0033617	Mitochondrial cytochrome c oxidase assembly	3	22	1.69	0.0060	SCO1,SURF1,BCS1L
GO Process	GO:0042450	Arginine biosynthetic process via ornithine	2	2	2.55	0.0060	OTC,ASL
GO Process	GO:0006090	Pyruvate metabolic process	4	69	1.31	0.0066	DHTKD1,PDHB,ALDOB,PC
GO Process	GO:0043603	Cellular amide metabolic process	10	773	0.66	0.0069	OTC,GCDH,MCCC1,ASL,PDHB,MCCC2,FH,ASS1,PC,ACSF3
GO Process	GO:0044271	Cellular nitrogen compound biosynthetic process	14	1522	0.51	0.0076	OTC,GCDH,UMPS,COX10,CAD,POLG,ASL,PDHB,FH,ACADM,ASS1,ALDH7A1,ACSF3,ADSL
GO Process	GO:0044205	De novo ump biosynthetic process	2	3	2.38	0.0092	UMPS,CAD
GO Process	GO:1901135	Carbohydrate derivative metabolic process	11	987	0.6	0.0101	GCDH,UMPS,DHTKD1,CAD,PDHB,UPB1,MCCC2,DPYD,ALDOB,ACSF3,ADSL
GO Process	GO:0046471	Phosphatidylglycerol metabolic process	3	30	1.55	0.0126	HADHB,SERAC1,HADHA
GO Process	GO:0019240	Citrulline biosynthetic process	2	4	2.25	0.0133	OTC,CAD
GO Process	GO:0006807	Nitrogen compound metabolic process	33	6852	0.23	0.0158	OTC,GCDH,UMPS,LIAS,COX10,DHTKD1,CAD,MCCC1,POLG,ASL,PDHB,ALDH5A1,UPB1,HPDL,MCCC2,FH,ACADSB,PHGDH,DBT,DPYD,ACADM,ASS1,UGT1A1,ALDOB,GLDC,LIPT1,PC,ACY1,PYCR1,ALDH7A1,IVD,ACSF3,ADSL
GO Process	GO:0009156	Ribonucleoside monophosphate biosynthetic process	3	33	1.51	0.0158	UMPS,CAD,ADSL
GO Process	GO:0009448	Gamma-aminobutyric acid metabolic process	2	5	2.15	0.0179	ALDH5A1,PHGDH
GO Process	GO:0046483	Heterocycle metabolic process	19	2840	0.38	0.0191	GCDH,UMPS,LIAS,COX10,DHTKD1,CAD,MCCC1,POLG,PDHB,UPB1,MCCC2,FH,DPYD,UGT1A1,ALDOB,PC,PYCR1,ACSF3,ADSL
GO Process	GO:1901360	Organic cyclic compound metabolic process	20	3118	0.36	0.0207	GCDH,UMPS,LIAS,COX10,DHTKD1,CAD,MCCC1,POLG,PDHB,UPB1,HPDL,MCCC2,FH,DPYD,UGT1A1,ALDOB,PC,PYCR1,ACSF3,ADSL
GO Process	GO:0006105	Succinate metabolic process	2	6	2023-07-02	0.0227	SDHA,ALDH5A1
GO Process	GO:0006207	De novo pyrimidine nucleobase biosynthetic process	2	6	2023-07-02	0.0227	UMPS,CAD
GO Process	GO:0006578	Amino-acid betaine biosynthetic process	2	7	2023-01-02	0.0284	ACADM,ALDH7A1
GO Process	GO:0009249	Protein lipoylation	2	7	2023-01-02	0.0284	LIAS,LIPT1
GO Process	GO:0071616	acyl-CoA biosynthetic process	3	45	1.38	0.0334	GCDH,PDHB,ACSF3
GO Process	GO:0035965	Cardiolipin acyl-chain remodeling	2	8	1.95	0.0341	HADHB,HADHA
GO Process	GO:0014075	Response to amine	3	48	1.35	0.0387	CAD,ASS1,GLDC
GO Process	GO:0033875	Ribonucleoside bisphosphate metabolic process	4	129	2023-04-01	0.0489	GCDH,PDHB,MCCC2,ACSF3
GO Process	GO:0034032	Purine nucleoside bisphosphate metabolic process	4	129	2023-04-01	0.0489	GCDH,PDHB,MCCC2,ACSF3
GO Molecular Function
GO Function	GO:0016491	Oxidoreductase activity	24	726	2023-07-01	1.74e-16	GCDH,NDUFS7,NDUFB3,ACADS,DHTKD1,SDHA,NDUFA9,PDHB,ACAD9,ALDH5A1,HADHB,HPDL,NDUFS2,ACADSB,PHGDH,DPYD,ACADM,SURF1,COX4I2,HADHA,GLDC,PYCR1,ALDH7A1,IVD
GO Function	GO:0003824	Catalytic activity	47	5486	0.48	1.91e-15	OTC,ACO2,GCDH,UMPS,NDUFS7,NDUFB3,ACADS,LIAS,COX10,DHTKD1,CAD,SDHA,MCCC1,NDUFA9,POLG,CLPB,ASL,PDHB,ACAD9,ALDH5A1,UPB1,HADHB,HPDL,MCCC2,FH,NDUFS2,ACADSB,PHGDH,DBT,DPYD,ACADM,SURF1,ASS1,UGT1A1,ALDOB,COX4I2,HADHA,GLDC,LIPT1,PC,ACY1,PYCR1,ALDH7A1,DHX30,IVD,ACSF3,ADSL
GO Function	GO:0003995	acyl-CoA dehydrogenase activity	6	11	2.29	4.77e-09	GCDH,ACADS,ACAD9,ACADSB,ACADM,IVD
GO Function	GO:0016627	Oxidoreductase activity, acting on the ch-ch group of donors	8	59	1.68	1.04e-08	GCDH,ACADS,SDHA,ACAD9,ACADSB,DPYD,ACADM,IVD
GO Function	GO:0036094	Small molecule binding	27	2516	0.58	6.00e-08	OTC,GCDH,ACADS,DHTKD1,CAD,SDHA,MCCC1,NUBPL,CLPB,ACAD9,MCCC2,NDUFS2,ACADSB,PHGDH,DBT,DPYD,ACADM,ASS1,UGT1A1,ALDOB,HADHA,GLDC,PC,DHX30,BCS1L,IVD,ACSF3
GO Function	GO:0050660	Flavin adenine dinucleotide binding	8	82	1.54	7.86e-08	GCDH,ACADS,SDHA,ACAD9,ACADSB,DPYD,ACADM,IVD
GO Function	GO:0016829	Lyase activity	9	184	1.24	1.42e-06	ACO2,UMPS,ASL,HADHB,FH,ALDOB,HADHA,GLDC,ADSL
GO Function	GO:0051539	4 iron, 4 sulfur cluster binding	6	42	1.71	1.66e-06	ACO2,NDUFS7,LIAS,NUBPL,NDUFS2,DPYD
GO Function	GO:0000166	Nucleotide binding	21	2119	0.55	3.51e-05	GCDH,ACADS,CAD,SDHA,MCCC1,NUBPL,CLPB,ACAD9,MCCC2,NDUFS2,ACADSB,PHGDH,DPYD,ACADM,ASS1,HADHA,PC,DHX30,BCS1L,IVD,ACSF3
GO Function	GO:0043168	Anion binding	24	2805	0.48	3.87e-05	OTC,GCDH,ACADS,DHTKD1,CAD,SDHA,MCCC1,NUBPL,CLPB,ACAD9,MCCC2,ACADSB,DBT,DPYD,ACADM,ASS1,UGT1A1,HADHA,GLDC,PC,DHX30,BCS1L,IVD,ACSF3
GO Function	GO:0031406	Carboxylic acid binding	8	218	2023-12-01	4.84e-05	OTC,CAD,MCCC1,DBT,ASS1,UGT1A1,GLDC,PC
GO Function	GO:0009055	Electron transfer activity	6	103	1.32	0.00012	SDHA,NDUFS2,PHGDH,SURF1,COX4I2,GLDC
GO Function	GO:0016885	Ligase activity, forming carbon-carbon bonds	3	7	2.18	0.00047	MCCC1,MCCC2,PC
GO Function	GO:0016874	Ligase activity	6	156	1.14	0.0011	CAD,MCCC1,MCCC2,ASS1,PC,ACSF3
GO Function	GO:0016903	Oxidoreductase activity, acting on the aldehyde or oxo group of donors	4	40	1.55	0.0012	DHTKD1,PDHB,ALDH5A1,ALDH7A1
GO Function	GO:1901681	Sulfur compound binding	7	262	0.98	0.0016	GCDH,DHTKD1,MCCC1,ACAD9,DBT,HADHA,PC
GO Function	GO:0008137	NADH dehydrogenase (ubiquinone) activity	4	46	1.49	0.0017	NDUFS7,NDUFB3,NDUFA9,NDUFS2
GO Function	GO:0042802	Identical protein binding	17	1896	0.5	0.0017	OTC,UMPS,CAD,ASL,ALDH5A1,UPB1,DPYD,ACADM,ASS1,UGT1A1,ALDOB,GLDC,PC,ACY1,PYCR1,IVD,ADSL
GO Function	GO:0016836	Hydro-lyase activity	4	57	2023-04-01	0.0033	ACO2,HADHB,FH,HADHA
GO Function	GO:0016597	Amino acid binding	4	59	1.38	0.0036	OTC,CAD,ASS1,GLDC
GO Function	GO:0000062	fatty-acyl-CoA binding	3	21	1.71	0.0047	GCDH,ACAD9,HADHA
GO Function	GO:0004085	butyryl-CoA dehydrogenase activity	2	2	2.55	0.0051	ACADS,IVD
GO Function	GO:0004485	methylcrotonoyl-CoA carboxylase activity	2	2	2.55	0.0051	MCCC1,MCCC2
GO Function	GO:0016743	Carboxyl- or carbamoyltransferase activity	2	2	2.55	0.0051	OTC,CAD
GO Function	GO:0033293	Monocarboxylic acid binding	4	73	1.29	0.0059	MCCC1,DBT,UGT1A1,PC
GO Function	GO:0070991	medium-chain-acyl-CoA dehydrogenase activity	2	3	2.38	0.0069	ACAD9,ACADM
GO Function	GO:0043167	Ion binding	31	6188	0.25	0.0113	OTC,ACO2,GCDH,NDUFS7,ACADS,SCO1,LIAS,DHTKD1,CAD,SDHA,MCCC1,NUBPL,CLPB,ACAD9,HPDL,MCCC2,NDUFS2,ACADSB,DBT,DPYD,ACADM,ASS1,UGT1A1,HADHA,GLDC,PC,ACY1,DHX30,BCS1L,IVD,ACSF3
GO Function	GO:0009374	Biotin binding	2	5	2.15	0.0133	MCCC1,PC
GO Function	GO:0032559	Adenyl ribonucleotide binding	13	1522	0.48	0.0200	GCDH,CAD,MCCC1,NUBPL,CLPB,ACAD9,MCCC2,ASS1,HADHA,PC,DHX30,BCS1L,ACSF3
GO Function	GO:0003988	acetyl-CoA C-acyltransferase activity	2	7	2023-01-02	0.0205	HADHB,HADHA
GO Function	GO:0016842	Amidine-lyase activity	2	7	2023-01-02	0.0205	ASL,ADSL
GO Function	GO:0003857	3-hydroxyacyl-CoA dehydrogenase activity	2	8	1.95	0.0241	HADHB,HADHA
GO Function	GO:0016624	Oxidoreductase activity, acting on the aldehyde or oxo group of donors, disulfide as acceptor	2	8	1.95	0.0241	DHTKD1,PDHB
GO Function	GO:0016879	Ligase activity, forming carbon-nitrogen bonds	3	47	1.36	0.0251	CAD,MCCC1,ASS1
GO Function	GO:0004300	enoyl-CoA hydratase activity	2	9	2023-09-01	0.0276	HADHB,HADHA
GO Function	GO:0051287	NAD binding	3	56	1.28	0.0393	NDUFS2,PHGDH,HADHA
GO Function	GO:0019842	Vitamin binding	4	142	1.0	0.0474	DHTKD1,MCCC1,GLDC,PC
GO Cellular Component
GO Component	GO:0005739	Mitochondrion	44	1611	0.99	2.66e-34	OTC,ACO2,GCDH,NDUFS7,NDUFB3,ACADS,SCO1,LRPPRC,LIAS,COX10,DHTKD1,SDHA,MCCC1,NDUFA9,POLG,NUBPL,CLPB,PDHB,TMEM70,ACAD9,ALDH5A1,NDUFAF3,HADHB,MCCC2,TMEM126B,FH,SERAC1,NDUFS2,ACADSB,DBT,ACADM,SURF1,ASS1,COX4I2,HADHA,GLDC,LIPT1,PC,PYCR1,ALDH7A1,DHX30,BCS1L,IVD,ACSF3
GO Component	GO:0005759	Mitochondrial matrix	30	479	1.35	1.62e-30	OTC,ACO2,GCDH,NDUFS7,ACADS,LRPPRC,LIAS,DHTKD1,MCCC1,NDUFA9,POLG,NUBPL,PDHB,ALDH5A1,HADHB,MCCC2,FH,NDUFS2,ACADSB,DBT,ACADM,HADHA,GLDC,LIPT1,PC,PYCR1,ALDH7A1,DHX30,IVD,ACSF3
GO Component	GO:0005740	Mitochondrial envelope	21	766	0.99	4.71e-13	OTC,NDUFS7,NDUFB3,SCO1,COX10,SDHA,NDUFA9,CLPB,TMEM70,ACAD9,NDUFAF3,HADHB,TMEM126B,NDUFS2,ACADM,SURF1,ASS1,COX4I2,HADHA,BCS1L,IVD
GO Component	GO:0031966	Mitochondrial membrane	20	722	0.99	1.72e-12	OTC,NDUFS7,NDUFB3,SCO1,COX10,SDHA,NDUFA9,TMEM70,ACAD9,NDUFAF3,HADHB,TMEM126B,NDUFS2,ACADM,SURF1,ASS1,COX4I2,HADHA,BCS1L,IVD
GO Component	GO:0019866	Organelle inner membrane	18	541	2023-07-01	2.15e-12	OTC,NDUFS7,NDUFB3,SCO1,LRPPRC,COX10,SDHA,NDUFA9,TMEM70,ACAD9,NDUFAF3,HADHB,TMEM126B,NDUFS2,SURF1,COX4I2,HADHA,BCS1L
GO Component	GO:0005743	Mitochondrial inner membrane	17	480	2023-01-01	4.41e-12	OTC,NDUFS7,NDUFB3,SCO1,COX10,SDHA,NDUFA9,TMEM70,ACAD9,NDUFAF3,HADHB,TMEM126B,NDUFS2,SURF1,COX4I2,HADHA,BCS1L
GO Component	GO:0031967	Organelle envelope	22	1213	0.81	1.26e-10	OTC,NDUFS7,NDUFB3,SCO1,LRPPRC,COX10,SDHA,NDUFA9,CLPB,TMEM70,ACAD9,NDUFAF3,HADHB,TMEM126B,NDUFS2,ACADM,SURF1,ASS1,COX4I2,HADHA,BCS1L,IVD
GO Component	GO:0098798	Mitochondrial protein complex	13	262	1.25	1.26e-10	NDUFS7,NDUFB3,SDHA,MCCC1,NDUFA9,POLG,PDHB,MCCC2,NDUFS2,DBT,COX4I2,HADHA,BCS1L
GO Component	GO:1990204	Oxidoreductase complex	10	107	1.52	1.52e-10	NDUFS7,NDUFB3,DHTKD1,SDHA,NDUFA9,PDHB,NDUFS2,DBT,GLDC,BCS1L
GO Component	GO:0005737	Cytoplasm	54	11428	0.23	9.35e-10	OTC,ACO2,GCDH,UMPS,NDUFS7,NDUFB3,ACADS,SCO1,LRPPRC,LIAS,COX10,DHTKD1,CAD,SDHA,MCCC1,NDUFA9,POLG,NUBPL,CLPB,ASL,PDHB,TMEM70,ACAD9,ALDH5A1,NDUFAF3,UPB1,HADHB,MCCC2,TMEM126B,FH,SERAC1,NDUFS2,ACADSB,PHGDH,DBT,DPYD,ACADM,SURF1,ASS1,UGT1A1,ALDOB,COX4I2,HADHA,GLDC,LIPT1,PC,ACY1,PYCR1,ALDH7A1,DHX30,BCS1L,IVD,ACSF3,ADSL
GO Component	GO:0005746	Mitochondrial respirasome	8	84	1.53	2.47e-08	NDUFS7,NDUFB3,SDHA,NDUFA9,NDUFS2,SURF1,COX4I2,BCS1L
GO Component	GO:0098803	Respiratory chain complex	7	80	1.49	5.46e-07	NDUFS7,NDUFB3,SDHA,NDUFA9,NDUFS2,COX4I2,BCS1L
GO Component	GO:0042645	Mitochondrial nucleoid	6	44	1.69	6.00e-07	LRPPRC,POLG,HADHB,DBT,HADHA,DHX30
GO Component	GO:0043227	Membrane-bounded organelle	52	12427	0.17	8.16e-06	OTC,ACO2,GCDH,UMPS,NDUFS7,NDUFB3,ACADS,SCO1,LRPPRC,LIAS,COX10,DHTKD1,CAD,SDHA,MCCC1,NDUFA9,POLG,NUBPL,CLPB,ASL,PDHB,TMEM70,ACAD9,ALDH5A1,NDUFAF3,UPB1,HADHB,MCCC2,TMEM126B,FH,SERAC1,NDUFS2,ACADSB,PHGDH,DBT,ACADM,SURF1,ASS1,UGT1A1,ALDOB,COX4I2,HADHA,GLDC,LIPT1,PC,ACY1,PYCR1,ALDH7A1,DHX30,BCS1L,IVD,ACSF3
GO Component	GO:0098800	Inner mitochondrial membrane protein complex	7	131	1.28	1.06e-05	NDUFS7,NDUFB3,SDHA,NDUFA9,NDUFS2,COX4I2,BCS1L
GO Component	GO:0070013	Intracellular organelle lumen	35	5857	0.33	2.32e-05	OTC,ACO2,GCDH,NDUFS7,ACADS,LRPPRC,LIAS,COX10,DHTKD1,CAD,SDHA,MCCC1,NDUFA9,POLG,NUBPL,CLPB,PDHB,TMEM70,ALDH5A1,HADHB,MCCC2,FH,NDUFS2,ACADSB,DBT,ACADM,HADHA,GLDC,LIPT1,PC,PYCR1,ALDH7A1,DHX30,IVD,ACSF3
GO Component	GO:0043231	Intracellular membrane-bounded organelle	47	10761	0.19	0.00012	OTC,ACO2,GCDH,UMPS,NDUFS7,NDUFB3,ACADS,SCO1,LRPPRC,LIAS,COX10,DHTKD1,CAD,SDHA,MCCC1,NDUFA9,POLG,NUBPL,CLPB,PDHB,TMEM70,ACAD9,ALDH5A1,NDUFAF3,HADHB,MCCC2,TMEM126B,FH,SERAC1,NDUFS2,ACADSB,DBT,ACADM,SURF1,ASS1,UGT1A1,COX4I2,HADHA,GLDC,LIPT1,PC,PYCR1,ALDH7A1,DHX30,BCS1L,IVD,ACSF3
GO Component	GO:0070069	Cytochrome complex	4	32	1.65	0.00022	COX10,UGT1A1,COX4I2,BCS1L
GO Component	GO:0005747	Mitochondrial respiratory chain complex i	4	48	1.47	0.00088	NDUFS7,NDUFB3,NDUFA9,NDUFS2
GO Component	GO:0045239	Tricarboxylic acid cycle enzyme complex	3	14	1.88	0.00088	DHTKD1,FH,DBT
GO Component	GO:0002169	3-methylcrotonyl-CoA carboxylase complex, mitochondrial	2	2	2.55	0.0026	MCCC1,MCCC2
GO Component	GO:1902494	Catalytic complex	13	1328	0.54	0.0035	NDUFS7,NDUFB3,DHTKD1,SDHA,MCCC1,NDUFA9,POLG,PDHB,MCCC2,NDUFS2,DBT,GLDC,BCS1L
GO Component	GO:0043229	Intracellular organelle	48	12528	0.13	0.0056	OTC,ACO2,GCDH,UMPS,NDUFS7,NDUFB3,ACADS,SCO1,LRPPRC,LIAS,COX10,DHTKD1,CAD,SDHA,MCCC1,NDUFA9,POLG,NUBPL,CLPB,PDHB,TMEM70,ACAD9,ALDH5A1,NDUFAF3,HADHB,MCCC2,TMEM126B,FH,SERAC1,NDUFS2,ACADSB,DBT,ACADM,SURF1,ASS1,UGT1A1,ALDOB,COX4I2,HADHA,GLDC,LIPT1,PC,PYCR1,ALDH7A1,DHX30,BCS1L,IVD,ACSF3
GO Component	GO:0031090	Organelle membrane	22	3548	0.34	0.0064	OTC,NDUFS7,NDUFB3,SCO1,LRPPRC,COX10,SDHA,NDUFA9,TMEM70,ACAD9,NDUFAF3,HADHB,TMEM126B,NDUFS2,ACADM,SURF1,ASS1,UGT1A1,COX4I2,HADHA,BCS1L,IVD
GO Component	GO:0045240	Dihydrolipoyl dehydrogenase complex	2	10	1.85	0.0243	DHTKD1,DBT
KEGG	hsa01100	Metabolic pathways	40	1447	0.99	1.22e-30	OTC,ACO2,GCDH,UMPS,NDUFS7,NDUFB3,ACADS,LIAS,COX10,DHTKD1,CAD,SDHA,MCCC1,NDUFA9,ASL,PDHB,ALDH5A1,UPB1,HADHB,MCCC2,FH,NDUFS2,ACADSB,PHGDH,DBT,DPYD,ASS1,UGT1A1,ALDOB,COX4I2,HADHA,GLDC,LIPT1,PC,ACY1,PYCR1,ALDH7A1,IVD,ACSF3,ADSL
KEGG	hsa00280	Valine, leucine and isoleucine degradation	10	46	1.89	6.84e-14	ACADS,MCCC1,HADHB,MCCC2,ACADSB,DBT,HADHA,ALDH7A1,IVD,ACSF3
KEGG	hsa01230	Biosynthesis of amino acids	9	73	1.64	1.51e-10	OTC,ACO2,ASL,PHGDH,ASS1,ALDOB,PC,ACY1,PYCR1
KEGG	hsa01200	Carbon metabolism	10	117	1.48	1.73e-10	ACO2,ACADS,SDHA,PDHB,FH,PHGDH,ALDOB,HADHA,GLDC,PC
KEGG	hsa00071	Fatty acid degradation	6	42	1.71	2.76e-07	GCDH,ACADS,HADHB,ACADSB,HADHA,ALDH7A1
KEGG	hsa00020	Citrate cycle (TCA cycle)	5	29	1.79	2.10e-06	ACO2,SDHA,PDHB,FH,PC
KEGG	hsa00410	beta-Alanine metabolism	5	29	1.79	2.10e-06	ACADS,UPB1,DPYD,HADHA,ALDH7A1
KEGG	hsa00190	Oxidative phosphorylation	7	130	1.28	4.19e-06	NDUFS7,NDUFB3,COX10,SDHA,NDUFA9,NDUFS2,COX4I2
KEGG	hsa00250	Alanine, aspartate and glutamate metabolism	5	36	1.69	4.19e-06	CAD,ASL,ALDH5A1,ASS1,ADSL
KEGG	hsa04714	Thermogenesis	8	229	2023-09-01	1.01e-05	NDUFS7,NDUFB3,COX10,SDHA,NDUFA9,NDUFAF3,NDUFS2,COX4I2
KEGG	hsa00220	Arginine biosynthesis	4	21	1.83	1.96e-05	OTC,ASL,ASS1,ACY1
KEGG	hsa01212	Fatty acid metabolism	5	54	1.52	1.96e-05	ACADS,HADHB,ACADSB,HADHA,ACSF3
KEGG	hsa04932	Non-alcoholic fatty liver disease	6	148	1.16	0.00012	NDUFS7,NDUFB3,SDHA,NDUFA9,NDUFS2,COX4I2
KEGG	hsa00620	Pyruvate metabolism	4	38	1.57	0.00014	PDHB,FH,PC,ALDH7A1
KEGG	hsa00380	Tryptophan metabolism	4	41	1.54	0.00017	GCDH,DHTKD1,HADHA,ALDH7A1
KEGG	hsa00240	Pyrimidine metabolism	4	56	1.41	0.00050	UMPS,CAD,UPB1,DPYD
KEGG	hsa00310	Lysine degradation	4	60	1.38	0.00061	GCDH,DHTKD1,HADHA,ALDH7A1
KEGG	hsa05012	Parkinson disease	6	240	0.95	0.0012	NDUFS7,NDUFB3,SDHA,NDUFA9,NDUFS2,COX4I2
KEGG	hsa00650	Butanoate metabolism	3	27	2023-06-01	0.0013	ACADS,ALDH5A1,HADHA
KEGG	hsa00983	Drug metabolism - other enzymes	4	75	1.28	0.0013	UMPS,UPB1,DPYD,UGT1A1
KEGG	hsa05020	Prion disease	6	265	0.91	0.0017	NDUFS7,NDUFB3,SDHA,NDUFA9,NDUFS2,COX4I2
KEGG	hsa00785	Lipoic acid metabolism	2	4	2.25	0.0018	LIAS,LIPT1
KEGG	hsa00640	Propanoate metabolism	3	34	2023-05-01	0.0022	ACADS,DBT,HADHA
KEGG	hsa00260	Glycine, serine and threonine metabolism	3	38	1.45	0.0028	PHGDH,GLDC,ALDH7A1
KEGG	hsa05016	Huntington disease	6	298	0.86	0.0028	NDUFS7,NDUFB3,SDHA,NDUFA9,NDUFS2,COX4I2
KEGG	hsa05014	Amyotrophic lateral sclerosis	6	352	0.78	0.0062	NDUFS7,NDUFB3,SDHA,NDUFA9,NDUFS2,COX4I2
KEGG	hsa05010	Alzheimer disease	6	355	0.78	0.0063	NDUFS7,NDUFB3,SDHA,NDUFA9,NDUFS2,COX4I2
KEGG	hsa04723	Retrograde endocannabinoid signaling	4	145	0.99	0.0097	NDUFS7,NDUFB3,NDUFA9,NDUFS2
KEGG	hsa00010	Glycolysis / Gluconeogenesis	3	65	1.22	0.0106	PDHB,ALDOB,ALDH7A1
KEGG	hsa01210	2-Oxocarboxylic acid metabolism	2	18	2023-06-01	0.0159	ACO2,ACY1
KEGG	hsa00770	Pantothenate and CoA biosynthesis	2	21	1.53	0.0204	UPB1,DPYD
KEGG	hsa00062	Fatty acid elongation	2	25	1.45	0.0272	HADHB,HADHA
KEGG	hsa00053	Ascorbate and aldarate metabolism	2	26	1.44	0.0283	UGT1A1,ALDH7A1
KEGG	hsa00630	Glyoxylate and dicarboxylate metabolism	2	30	1.38	0.0358	ACO2,GLDC
Reactome
Reactome	HSA-1430728	Metabolism	46	2089	0.89	1.61e-32	OTC,ACO2,GCDH,UMPS,NDUFS7,NDUFB3,ACADS,SCO1,LRPPRC,LIAS,COX10,DHTKD1,CAD,SDHA,MCCC1,NDUFA9,NUBPL,ASL,PDHB,ACAD9,NDUFAF3,UPB1,HADHB,MCCC2,TMEM126B,FH,NDUFS2,ACADSB,PHGDH,DBT,DPYD,ACADM,SURF1,ASS1,UGT1A1,ALDOB,HADHA,GLDC,LIPT1,PC,ACY1,PYCR1,ALDH7A1,IVD,ACSF3,ADSL
Reactome	HSA-1428517	The citric acid (TCA) cycle and respiratory electron transport	15	176	1.48	3.52e-15	ACO2,NDUFS7,NDUFB3,SCO1,LRPPRC,SDHA,NDUFA9,NUBPL,PDHB,ACAD9,NDUFAF3,TMEM126B,FH,NDUFS2,SURF1
Reactome	HSA-611105	Respiratory electron transport	12	101	1.63	1.47e-13	NDUFS7,NDUFB3,SCO1,LRPPRC,SDHA,NDUFA9,NUBPL,ACAD9,NDUFAF3,TMEM126B,NDUFS2,SURF1
Reactome	HSA-71291	Metabolism of amino acids and derivatives	17	365	1.22	1.47e-13	OTC,GCDH,LIAS,DHTKD1,MCCC1,ASL,PDHB,MCCC2,ACADSB,PHGDH,DBT,ASS1,GLDC,LIPT1,PYCR1,ALDH7A1,IVD
Reactome	HSA-6799198	Complex I biogenesis	8	55	1.71	2.79e-09	NDUFS7,NDUFB3,NDUFA9,NUBPL,ACAD9,NDUFAF3,TMEM126B,NDUFS2
Reactome	HSA-389661	Glyoxylate metabolism and glycine degradation	6	31	1.84	2.47e-07	LIAS,DHTKD1,PDHB,DBT,GLDC,LIPT1
Reactome	HSA-70895	Branched-chain amino acid catabolism	5	21	1.93	2.45e-06	MCCC1,MCCC2,ACADSB,DBT,IVD
Reactome	HSA-77286	Mitochondrial fatty acid beta-oxidation of saturated fatty acids	4	11	2023-11-02	1.78e-05	ACADS,HADHB,ACADM,HADHA
Reactome	HSA-77348	Beta oxidation of octanoyl-CoA to hexanoyl-CoA	3	5	2.33	0.00025	HADHB,ACADM,HADHA
Reactome	HSA-77350	Beta oxidation of hexanoyl-CoA to butanoyl-CoA	3	5	2.33	0.00025	ACADS,HADHB,HADHA
Reactome	HSA-77288	Mitochondrial fatty acid beta-oxidation of unsaturated fatty acids	3	6	2.25	0.00031	HADHB,ACADM,HADHA
Reactome	HSA-77346	Beta oxidation of decanoyl-CoA to octanoyl-CoA-CoA	3	6	2.25	0.00031	HADHB,ACADM,HADHA
Reactome	HSA-3371599	Defective HLCS causes multiple carboxylase deficiency	3	7	2.18	0.00038	MCCC1,MCCC2,PC
Reactome	HSA-70635	Urea cycle	3	10	2023-03-02	0.00075	OTC,ASL,ASS1
Reactome	HSA-196780	Biotin transport and metabolism	3	11	1.99	0.00090	MCCC1,MCCC2,PC
Reactome	HSA-15869	Metabolism of nucleotides	5	99	1.25	0.0012	UMPS,CAD,UPB1,DPYD,ADSL
Reactome	HSA-8956320	Nucleobase biosynthesis	3	15	1.85	0.0018	UMPS,CAD,ADSL
Reactome	HSA-71406	Pyruvate metabolism and Citric Acid (TCA) cycle	4	55	1.41	0.0023	ACO2,SDHA,PDHB,FH
Reactome	HSA-71403	Citric acid cycle (TCA cycle)	3	22	1.69	0.0045	ACO2,SDHA,FH
Reactome	HSA-500753	Pyrimidine biosynthesis	2	3	2.38	0.0069	UMPS,CAD
Reactome	HSA-77285	Beta oxidation of myristoyl-CoA to lauroyl-CoA	2	3	2.38	0.0069	HADHB,HADHA
Reactome	HSA-77305	Beta oxidation of palmitoyl-CoA to myristoyl-CoA	2	3	2.38	0.0069	HADHB,HADHA
Reactome	HSA-8978868	Fatty acid metabolism	5	175	2023-01-01	0.0119	ACADS,HADHB,ACADM,HADHA,ACSF3
Reactome	HSA-77310	Beta oxidation of lauroyl-CoA to decanoyl-CoA-CoA	2	5	2.15	0.0125	HADHB,HADHA
Reactome	HSA-1482798	Acyl chain remodeling of CL	2	6	2023-07-02	0.0160	HADHB,HADHA
Reactome	HSA-5668914	Diseases of metabolism	5	244	0.86	0.0475	MCCC1,MCCC2,ALDOB,PC,ACY1
Reactome	HSA-71064	Lysine catabolism	2	12	1.77	0.0481	GCDH,ALDH7A1
Reactome	HSA-73621	Pyrimidine catabolism	2	12	1.77	0.0481	UPB1,DPYD

## Sheet: Enrichment subnetwork5 seizure 
#category	term ID	term description	observed gene count	background gene count	strength	false discovery rate	matching proteins in your network (labels)
GO Biological Process
GO Process	GO:0007517	Muscle organ development	10	291	2023-04-01	5.43e-08	STAC3,MYH7,ELN,RYR1,DMD,ACTA1,CAPN3,LAMA2,TTN,NEB
GO Process	GO:0048747	Muscle fiber development	6	54	1.91	1.15e-06	STAC3,RYR1,DMD,ACTA1,TTN,NEB
GO Process	GO:0055002	Striated muscle cell development	7	132	1.58	2.11e-06	STAC3,RYR1,DMD,ACTA1,CAPN3,TTN,NEB
GO Process	GO:0048731	System development	21	4426	0.54	4.25e-06	ATP7B,APOE,ARFGEF1,BCHE,FBN1,STAC3,MYH7,COL18A1,ELN,RYR1,DMD,ACTA1,FLNA,TREM2,HSPG2,AGRN,COL2A1,CAPN3,LAMA2,TTN,NEB
GO Process	GO:0030049	Muscle filament sliding	5	38	1.98	5.72e-06	MYH7,DMD,ACTA1,TTN,NEB
GO Process	GO:0048468	Cell development	14	1629	0.79	8.11e-06	APOE,ARFGEF1,STAC3,COL18A1,RYR1,DMD,ACTA1,FLNA,TREM2,AGRN,CAPN3,LAMA2,TTN,NEB
GO Process	GO:0048513	Animal organ development	18	3197	0.61	9.51e-06	ATP7B,FBN1,STAC3,MYH7,COL18A1,ELN,RYR1,DMD,ACTA1,FLNA,TREM2,HSPG2,AGRN,COL2A1,CAPN3,LAMA2,TTN,NEB
GO Process	GO:0030198	Extracellular matrix organization	8	338	1.23	1.55e-05	FBN1,COL18A1,ELN,HSPG2,AGRN,COL2A1,COLQ,LAMA2
GO Process	GO:0009653	Anatomical structure morphogenesis	15	2165	0.7	2.04e-05	APOE,FBN1,MYH7,COL18A1,ELN,RYR1,ACTA1,FLNA,HSPG2,AGRN,COL2A1,CAPN3,LAMA2,TTN,NEB
GO Process	GO:0009887	Animal organ morphogenesis	11	967	0.92	2.27e-05	FBN1,MYH7,COL18A1,ELN,RYR1,ACTA1,HSPG2,AGRN,COL2A1,LAMA2,TTN
GO Process	GO:0006936	Muscle contraction	7	248	1.31	2.81e-05	STAC3,MYH7,RYR1,DMD,ACTA1,TTN,NEB
GO Process	GO:0065008	Regulation of biological quality	19	4042	0.53	2.81e-05	ATP7B,APOE,ARFGEF1,ABCA7,CP,ALB,FBN1,MYH7,ELN,RYR1,DMD,FLNA,TREM2,AGRN,COL2A1,COLQ,CAPN3,LAMA2,NEB
GO Process	GO:0014706	Striated muscle tissue development	7	280	1.26	5.71e-05	STAC3,MYH7,ELN,RYR1,ACTA1,TTN,NEB
GO Process	GO:0043270	Positive regulation of ion transport	7	285	1.25	6.11e-05	APOE,ABCA7,STAC3,DMD,FLNA,TREM2,CAPN3
GO Process	GO:0072359	Circulatory system development	10	872	0.92	7.29e-05	APOE,FBN1,MYH7,COL18A1,ELN,RYR1,HSPG2,COL2A1,TTN,NEB
GO Process	GO:0032501	Multicellular organismal process	23	6933	0.38	7.32e-05	ATP7B,APOE,ARFGEF1,ABCA7,BCHE,ALB,FBN1,STAC3,MYH7,COL18A1,ELN,RYR1,DMD,ACTA1,FLNA,TREM2,HSPG2,AGRN,COL2A1,CAPN3,LAMA2,TTN,NEB
GO Process	GO:0009888	Tissue development	13	1760	0.73	7.41e-05	STAC3,MYH7,COL18A1,ELN,RYR1,ACTA1,FLNA,HSPG2,AGRN,COL2A1,LAMA2,TTN,NEB
GO Process	GO:1900223	Positive regulation of amyloid-beta clearance	3	7	2.49	0.00012	APOE,ABCA7,TREM2
GO Process	GO:0003008	System process	13	1942	0.69	0.00020	APOE,ABCA7,BCHE,STAC3,MYH7,COL18A1,ELN,RYR1,DMD,ACTA1,COL2A1,TTN,NEB
GO Process	GO:0031032	Actomyosin structure organization	5	111	1.51	0.00020	ELN,ACTA1,CAPN3,TTN,NEB
GO Process	GO:0030154	Cell differentiation	17	3702	0.52	0.00024	APOE,ARFGEF1,BCHE,STAC3,COL18A1,RYR1,DMD,ACTA1,FLNA,TREM2,HSPG2,AGRN,COL2A1,CAPN3,LAMA2,TTN,NEB
GO Process	GO:0043113	Receptor clustering	4	48	1.78	0.00028	APOE,FLNA,AGRN,COLQ
GO Process	GO:0016043	Cellular component organization	20	5447	0.43	0.00029	APOE,ARFGEF1,ABCA7,ALB,FBN1,COL18A1,ELN,RYR1,DMD,ACTA1,FLNA,TREM2,HSPG2,AGRN,COL2A1,COLQ,CAPN3,LAMA2,TTN,NEB
GO Process	GO:0030029	Actin filament-based process	8	592	0.99	0.00033	MYH7,ELN,DMD,ACTA1,FLNA,CAPN3,TTN,NEB
GO Process	GO:1904064	Positive regulation of cation transmembrane transport	5	145	2023-04-01	0.00056	STAC3,DMD,FLNA,TREM2,CAPN3
GO Process	GO:0030239	Myofibril assembly	4	62	1.67	0.00061	ACTA1,CAPN3,TTN,NEB
GO Process	GO:0051235	Maintenance of location	5	161	1.35	0.00083	ATP7B,APOE,ALB,FBN1,FLNA
GO Process	GO:0097435	Supramolecular fiber organization	7	480	2023-02-01	0.00092	ELN,ACTA1,FLNA,COL2A1,CAPN3,TTN,NEB
GO Process	GO:0007507	Heart development	7	522	0.99	0.0016	FBN1,MYH7,ELN,RYR1,COL2A1,TTN,NEB
GO Process	GO:0048741	Skeletal muscle fiber development	3	24	1.96	0.0018	STAC3,RYR1,ACTA1
GO Process	GO:1901076	Positive regulation of engulfment of apoptotic cell	2	2	2.86	0.0028	ABCA7,TREM2
GO Process	GO:0007010	Cytoskeleton organization	9	1126	0.76	0.0032	APOE,ELN,DMD,ACTA1,FLNA,AGRN,CAPN3,TTN,NEB
GO Process	GO:0006941	Striated muscle contraction	4	112	1.41	0.0043	STAC3,MYH7,DMD,TTN
GO Process	GO:1902995	Positive regulation of phospholipid efflux	2	3	2.68	0.0043	APOE,ABCA7
GO Process	GO:0003007	Heart morphogenesis	5	251	1.16	0.0052	MYH7,ELN,RYR1,COL2A1,TTN
GO Process	GO:0007015	Actin filament organization	5	254	1.15	0.0054	ELN,ACTA1,FLNA,TTN,NEB
GO Process	GO:0051050	Positive regulation of transport	8	923	0.8	0.0054	APOE,ABCA7,STAC3,DMD,FLNA,TREM2,CAPN3,TTN
GO Process	GO:0007519	Skeletal muscle tissue development	4	124	1.37	0.0057	STAC3,ELN,RYR1,ACTA1
GO Process	GO:0008582	Regulation of synaptic growth at neuromuscular junction	2	5	2.46	0.0077	AGRN,COLQ
GO Process	GO:0071827	Plasma lipoprotein particle organization	3	47	1.67	0.0087	APOE,ABCA7,ALB
GO Process	GO:0042592	Homeostatic process	10	1676	0.64	0.0091	ATP7B,APOE,CP,ALB,FBN1,RYR1,DMD,COL2A1,CAPN3,LAMA2
GO Process	GO:1905907	Negative regulation of amyloid fibril formation	2	6	2.38	0.0098	APOE,HSPG2
GO Process	GO:0030036	Actin cytoskeleton organization	6	516	0.93	0.0119	ELN,ACTA1,FLNA,CAPN3,TTN,NEB
GO Process	GO:0010035	Response to inorganic substance	6	538	0.91	0.0147	ATP7B,COL18A1,RYR1,ACTA1,CAPN3,TTN
GO Process	GO:0030240	Skeletal muscle thin filament assembly	2	9	2.21	0.0173	ACTA1,TTN
GO Process	GO:0051239	Regulation of multicellular organismal process	13	3227	0.47	0.0225	APOE,ABCA7,FBN1,MYH7,RYR1,DMD,FLNA,TREM2,HSPG2,AGRN,COLQ,CAPN3,LAMA2
GO Process	GO:0010038	Response to metal ion	5	367	0.99	0.0226	ATP7B,RYR1,ACTA1,CAPN3,TTN
GO Process	GO:1902903	Regulation of supramolecular fiber organization	5	368	0.99	0.0226	APOE,ARFGEF1,ELN,FLNA,HSPG2
GO Process	GO:0048646	Anatomical structure formation involved in morphogenesis	7	883	0.76	0.0238	COL18A1,ACTA1,HSPG2,COL2A1,CAPN3,TTN,NEB
GO Process	GO:0060249	Anatomical structure homeostasis	5	380	0.98	0.0244	ALB,DMD,COL2A1,CAPN3,LAMA2
GO Process	GO:0032989	Cellular component morphogenesis	6	614	0.85	0.0246	ACTA1,AGRN,CAPN3,LAMA2,TTN,NEB
GO Process	GO:0033700	Phospholipid efflux	2	12	2023-08-02	0.0246	APOE,ABCA7
GO Process	GO:0042221	Response to chemical	15	4333	0.4	0.0246	ATP7B,APOE,BCHE,ALB,FBN1,COL18A1,RYR1,ACTA1,FLNA,TREM2,AGRN,COL2A1,CAPN3,LAMA2,TTN
GO Process	GO:0097006	Regulation of plasma lipoprotein particle levels	3	75	1.46	0.0246	APOE,ABCA7,ALB
GO Process	GO:0010959	Regulation of metal ion transport	5	391	0.97	0.0263	STAC3,DMD,FLNA,TREM2,CAPN3
GO Process	GO:0008015	Blood circulation	5	394	0.96	0.0268	APOE,MYH7,ELN,DMD,TTN
GO Process	GO:0014819	Regulation of skeletal muscle contraction	2	13	2023-05-02	0.0268	MYH7,DMD
GO Process	GO:0034380	High-density lipoprotein particle assembly	2	13	2023-05-02	0.0268	APOE,ABCA7
GO Process	GO:0051128	Regulation of cellular component organization	11	2402	0.52	0.0268	APOE,ARFGEF1,ABCA7,ELN,DMD,FLNA,TREM2,HSPG2,AGRN,COLQ,NEB
GO Process	GO:0060048	Cardiac muscle contraction	3	79	1.44	0.0268	MYH7,DMD,TTN
GO Process	GO:0051179	Localization	17	5591	0.34	0.0278	ATP7B,APOE,ARFGEF1,ABCA7,CP,ALB,ANO5,FBN1,RYR1,DMD,FLNA,TREM2,HSPG2,AGRN,COLQ,CAPN3,TTN
GO Process	GO:1901699	Cellular response to nitrogen compound	6	645	0.83	0.0278	FBN1,RYR1,ACTA1,FLNA,TREM2,AGRN
GO Process	GO:1902430	Negative regulation of amyloid-beta formation	2	14	2023-02-02	0.0279	APOE,ABCA7
GO Process	GO:0001894	Tissue homeostasis	4	219	2023-12-01	0.0297	ALB,DMD,COL2A1,LAMA2
GO Process	GO:0010737	Protein kinase a signaling	2	15	1.99	0.0306	FBN1,TTN
GO Process	GO:0051651	Maintenance of location in cell	3	91	1.38	0.0342	ATP7B,APOE,ALB
GO Process	GO:0006897	Endocytosis	5	433	0.92	0.0346	APOE,ABCA7,ALB,TREM2,HSPG2
GO Process	GO:0006942	Regulation of striated muscle contraction	3	93	1.37	0.0354	MYH7,DMD,FLNA
GO Process	GO:2000026	Regulation of multicellular organismal development	10	2096	0.54	0.0354	APOE,FBN1,DMD,FLNA,TREM2,HSPG2,AGRN,COLQ,CAPN3,LAMA2
GO Process	GO:0060548	Negative regulation of cell death	7	999	0.71	0.0379	APOE,ALB,FLNA,TREM2,HSPG2,COL2A1,CAPN3
GO Process	GO:0006825	Copper ion transport	2	18	1.91	0.0389	ATP7B,CP
GO Process	GO:0034375	High-density lipoprotein particle remodeling	2	18	1.91	0.0389	APOE,ALB
GO Process	GO:0035994	Response to muscle stretch	2	18	1.91	0.0389	DMD,TTN
GO Process	GO:0008016	Regulation of heart contraction	4	245	2023-07-01	0.0393	MYH7,RYR1,DMD,FLNA
GO Process	GO:0042982	Amyloid precursor protein metabolic process	2	19	1.88	0.0415	APOE,ABCA7
GO Process	GO:0060341	Regulation of cellular localization	7	1027	0.69	0.0426	ABCA7,STAC3,RYR1,DMD,FLNA,TREM2,CAPN3
GO Process	GO:0065007	Biological regulation	25	12171	0.17	0.0430	ATP7B,APOE,ARFGEF1,ABCA7,BCHE,CP,ALB,FBN1,STAC3,MYH7,COL18A1,ELN,RYR1,DMD,ACTA1,FLNA,TREM2,HSPG2,AGRN,COL2A1,COLQ,CAPN3,LAMA2,TTN,NEB
GO Process	GO:0045807	Positive regulation of endocytosis	3	103	1.32	0.0435	APOE,ABCA7,TREM2
GO Process	GO:0010875	Positive regulation of cholesterol efflux	2	20	1.86	0.0437	APOE,ABCA7
GO Process	GO:0032414	Positive regulation of ion transmembrane transporter activity	3	105	1.32	0.0449	STAC3,DMD,TREM2
GO Process	GO:0070925	Organelle assembly	6	735	0.77	0.0449	DMD,ACTA1,FLNA,CAPN3,TTN,NEB
GO Process	GO:0046716	Muscle cell cellular homeostasis	2	21	1.84	0.0467	DMD,CAPN3
GO Process	GO:0055003	Cardiac myofibril assembly	2	21	1.84	0.0467	TTN,NEB
GO Process	GO:0001523	Retinoid metabolic process	3	108	2023-03-01	0.0471	APOE,HSPG2,AGRN
GO Process	GO:1901698	Response to nitrogen compound	7	1070	0.68	0.0498	BCHE,FBN1,RYR1,ACTA1,FLNA,TREM2,AGRN
GO Molecular Function
GO Function	GO:0005198	Structural molecule activity	14	635	2023-02-01	7.27e-11	APOE,FBN1,COL18A1,ELN,DMD,ACTA1,HSPG2,AGRN,COL2A1,COLQ,CAPN3,LAMA2,TTN,NEB
GO Function	GO:0005201	Extracellular matrix structural constituent	6	119	1.56	2.57e-05	FBN1,COL18A1,ELN,HSPG2,COL2A1,COLQ
GO Function	GO:0005515	Protein binding	23	7026	0.38	0.00021	APOE,ARFGEF1,BCHE,CP,ALB,ANO5,FBN1,FKRP,STAC3,MYH7,COL18A1,RYR1,DMD,ACTA1,FLNA,TREM2,HSPG2,AGRN,COL2A1,CAPN3,LAMA2,TTN,NEB
GO Function	GO:0008307	Structural constituent of muscle	4	43	1.83	0.00040	DMD,CAPN3,TTN,NEB
GO Function	GO:0002162	Dystroglycan binding	3	10	2.34	0.00043	FKRP,DMD,AGRN
GO Function	GO:0001540	Amyloid-beta binding	4	76	1.58	0.0021	APOE,BCHE,TREM2,HSPG2
GO Function	GO:0008092	Cytoskeletal protein binding	9	973	0.83	0.0021	APOE,ARFGEF1,MYH7,DMD,ACTA1,FLNA,CAPN3,TTN,NEB
GO Function	GO:0005488	Binding	27	12516	0.19	0.0024	ATP7B,APOE,ARFGEF1,ABCA7,BCHE,CP,ALB,ANO5,FBN1,FKRP,STAC3,MYH7,COL18A1,ELN,RYR1,DMD,ACTA1,FLNA,TREM2,HSPG2,AGRN,COL2A1,COLQ,CAPN3,LAMA2,TTN,NEB
GO Function	GO:0043167	Ion binding	20	6188	0.37	0.0027	ATP7B,APOE,ABCA7,BCHE,CP,ALB,FBN1,STAC3,MYH7,COL18A1,RYR1,DMD,ACTA1,TREM2,HSPG2,AGRN,COL2A1,COLQ,CAPN3,TTN
GO Function	GO:0097367	Carbohydrate derivative binding	12	2226	0.59	0.0052	ATP7B,APOE,ABCA7,FBN1,MYH7,RYR1,ACTA1,TREM2,AGRN,COL2A1,COLQ,TTN
GO Function	GO:0005539	Glycosaminoglycan binding	5	240	1.18	0.0056	APOE,FBN1,TREM2,AGRN,COLQ
GO Function	GO:0043394	Proteoglycan binding	3	37	1.77	0.0060	APOE,AGRN,COL2A1
GO Function	GO:0005507	Copper ion binding	3	57	1.58	0.0189	ATP7B,CP,ALB
GO Function	GO:0097493	Structural molecule activity conferring elasticity	2	9	2.21	0.0231	FBN1,TTN
GO Function	GO:0043169	Cation binding	15	4242	0.41	0.0279	ATP7B,APOE,BCHE,CP,ALB,FBN1,STAC3,COL18A1,RYR1,DMD,HSPG2,AGRN,COL2A1,CAPN3,TTN
GO Function	GO:0017022	Myosin binding	3	72	1.48	0.0298	ARFGEF1,DMD,ACTA1
GO Function	GO:0043168	Anion binding	12	2805	0.49	0.0306	ATP7B,APOE,ABCA7,ALB,FBN1,MYH7,RYR1,ACTA1,TREM2,AGRN,COLQ,TTN
GO Function	GO:0044877	Protein-containing complex binding	8	1216	0.68	0.0306	APOE,FBN1,MYH7,FLNA,TREM2,HSPG2,TTN,NEB
GO Function	GO:0051015	Actin filament binding	4	199	1.16	0.0306	MYH7,FLNA,TTN,NEB
GO Function	GO:0003779	Actin binding	5	438	0.92	0.0499	MYH7,DMD,FLNA,TTN,NEB
GO Function	GO:0005509	Calcium ion binding	6	703	0.79	0.0499	FBN1,RYR1,HSPG2,AGRN,CAPN3,TTN
GO Function	GO:0043395	Heparan sulfate proteoglycan binding	2	17	1.93	0.0499	APOE,AGRN
GO Cellular Component
GO Component	GO:0005604	Basement membrane	7	96	1.72	1.25e-07	FBN1,COL18A1,HSPG2,AGRN,COL2A1,COLQ,LAMA2
GO Component	GO:0030017	Sarcomere	8	207	1.45	2.91e-07	MYH7,RYR1,DMD,ACTA1,FLNA,CAPN3,TTN,NEB
GO Component	GO:0030018	Z disc	7	131	1.59	3.30e-07	MYH7,RYR1,DMD,FLNA,CAPN3,TTN,NEB
GO Component	GO:0062023	Collagen-containing extracellular matrix	9	396	1.22	5.16e-07	APOE,FBN1,COL18A1,ELN,HSPG2,AGRN,COL2A1,COLQ,LAMA2
GO Component	GO:0042383	Sarcolemma	6	132	1.52	4.45e-06	FKRP,STAC3,RYR1,DMD,CAPN3,LAMA2
GO Component	GO:0099512	Supramolecular fiber	11	939	0.93	4.45e-06	FBN1,MYH7,ELN,RYR1,DMD,ACTA1,FLNA,COL2A1,CAPN3,TTN,NEB
GO Component	GO:0005576	Extracellular region	19	4166	0.52	9.18e-06	APOE,BCHE,CP,ALB,FBN1,FKRP,COL18A1,ELN,RYR1,ACTA1,FLNA,TREM2,HSPG2,AGRN,COL2A1,COLQ,LAMA2,TTN,NEB
GO Component	GO:0005788	Endoplasmic reticulum lumen	7	308	1.22	2.29e-05	APOE,BCHE,CP,ALB,FBN1,COL18A1,COL2A1
GO Component	GO:0005615	Extracellular space	16	3195	0.56	6.23e-05	APOE,BCHE,CP,ALB,FBN1,FKRP,COL18A1,RYR1,ACTA1,FLNA,HSPG2,AGRN,COL2A1,COLQ,TTN,NEB
GO Component	GO:0072562	Blood microparticle	5	115	2023-05-01	6.23e-05	APOE,BCHE,CP,ALB,ACTA1
GO Component	GO:0043083	Synaptic cleft	3	18	2023-08-02	0.00031	APOE,COLQ,LAMA2
GO Component	GO:0005783	Endoplasmic reticulum	10	1438	0.7	0.0012	APOE,ABCA7,BCHE,CP,ALB,FBN1,FKRP,COL18A1,RYR1,COL2A1
GO Component	GO:0070062	Extracellular exosome	11	2099	0.58	0.0050	APOE,CP,ALB,COL18A1,RYR1,ACTA1,FLNA,HSPG2,AGRN,TTN,NEB
GO Component	GO:0030315	T-tubule	3	54	2023-06-01	0.0052	STAC3,RYR1,CAPN3
GO Component	GO:0031982	Vesicle	14	3879	0.42	0.0155	ATP7B,APOE,ABCA7,CP,ALB,ANO5,COL18A1,RYR1,ACTA1,FLNA,HSPG2,AGRN,TTN,NEB
GO Component	GO:0005581	Collagen trimer	3	88	1.39	0.0185	COL18A1,COL2A1,COLQ
GO Component	GO:0012505	Endomembrane system	15	4542	0.38	0.0197	ATP7B,APOE,ARFGEF1,ABCA7,BCHE,CP,ALB,ANO5,FBN1,FKRP,COL18A1,RYR1,HSPG2,AGRN,COL2A1
GO Component	GO:0005886	Plasma membrane	16	5314	0.34	0.0297	ATP7B,APOE,ABCA7,CP,ANO5,FKRP,STAC3,RYR1,DMD,FLNA,TREM2,HSPG2,AGRN,COLQ,CAPN3,LAMA2
GO Component	GO:0015629	Actin cytoskeleton	5	477	0.88	0.0297	MYH7,ACTA1,FLNA,TTN,NEB
GO Component	GO:0005865	Striated muscle thin filament	2	25	1.76	0.0368	ACTA1,TTN
KEGG	hsa04512	ECM-receptor interaction	4	88	1.52	0.0025	HSPG2,AGRN,COL2A1,LAMA2
KEGG	hsa05410	Hypertrophic cardiomyopathy	4	89	1.51	0.0025	MYH7,DMD,LAMA2,TTN
KEGG	hsa05414	Dilated cardiomyopathy	4	95	1.48	0.0025	MYH7,DMD,LAMA2,TTN
KEGG	hsa05416	Viral myocarditis	3	55	2023-06-01	0.0058	MYH7,DMD,LAMA2
Reactome
Reactome	HSA-1474244	Extracellular matrix organization	9	301	1.34	4.39e-07	FBN1,COL18A1,ELN,DMD,HSPG2,AGRN,COL2A1,CAPN3,LAMA2
Reactome	HSA-3000171	Non-integrin membrane-ECM interactions	5	59	1.79	2.63e-05	DMD,HSPG2,AGRN,COL2A1,LAMA2
Reactome	HSA-1474228	Degradation of the extracellular matrix	6	140	1.49	2.91e-05	FBN1,COL18A1,ELN,HSPG2,COL2A1,CAPN3
Reactome	HSA-216083	Integrin cell surface interactions	5	85	1.63	7.40e-05	FBN1,COL18A1,HSPG2,AGRN,COL2A1
Reactome	HSA-3000178	ECM proteoglycans	4	76	1.58	0.0018	HSPG2,AGRN,COL2A1,LAMA2
Reactome	HSA-3000157	Laminin interactions	3	30	1.86	0.0045	COL18A1,HSPG2,LAMA2
Reactome	HSA-8957275	Post-translational protein phosphorylation	4	107	1.43	0.0048	APOE,CP,ALB,FBN1
Reactome	HSA-390522	Striated Muscle Contraction	3	35	1.79	0.0052	DMD,ACTA1,TTN
Reactome	HSA-381426	Regulation of Insulin-like Growth Factor (IGF) transport and uptake by Insulin-like Growth Factor Binding Proteins (IGFBPs)	4	124	1.37	0.0066	APOE,CP,ALB,FBN1
Reactome	HSA-975634	Retinoid metabolism and transport	3	44	1.69	0.0079	APOE,HSPG2,AGRN
Reactome	HSA-382551	Transport of small molecules	7	721	0.85	0.0087	ATP7B,APOE,ABCA7,CP,ALB,ANO5,RYR1
Reactome	HSA-8964058	HDL remodeling	2	10	2.16	0.0200	APOE,ALB
Reactome	HSA-397014	Muscle contraction	4	193	1.18	0.0225	RYR1,DMD,ACTA1,TTN
Reactome	HSA-3656237	Defective EXT2 causes exostoses 2	2	14	2023-02-02	0.0314	HSPG2,AGRN
Reactome	HSA-3656253	Defective EXT1 causes exostoses 1, TRPS2 and CHDS	2	14	2023-02-02	0.0314	HSPG2,AGRN

## Sheet: Enrichment subnetwork6 seizure 
#category	term ID	term description	observed gene count	background gene count	strength	false discovery rate	matching proteins in your network (labels)
GO Biological Process
GO Process	GO:0006399	tRNA metabolic process	15	184	1.79	6.66e-20	AIMP2,PUS3,WARS2,NARS,TRMT5,TRMT10A,YARS2,TRIT1,TSEN54,ELAC2,RARS2,EXOSC8,LARS,TRMT1,SARS2
GO Process	GO:0034660	ncRNA metabolic process	16	467	1.41	3.96e-16	AIMP2,PUS3,WARS2,SBDS,NARS,TRMT5,TRMT10A,YARS2,TRIT1,TSEN54,ELAC2,RARS2,EXOSC8,LARS,TRMT1,SARS2
GO Process	GO:0016070	RNA metabolic process	20	1584	0.98	1.00e-13	AIMP2,PUS3,WARS2,SBDS,NARS,TRMT5,TRMT10A,YARS2,TRIT1,TSEN54,ELAC2,TTC37,RARS2,POLR3A,POLR1C,EXOSC8,LARS,PNPT1,TRMT1,SARS2
GO Process	GO:0140053	Mitochondrial gene expression	11	143	1.76	1.10e-13	MRPS34,WARS2,TRMT5,TRMT10A,TSFM,YARS2,TRIT1,ELAC2,RARS2,PNPT1,SARS2
GO Process	GO:0010467	Gene expression	21	2056	0.89	3.10e-13	MRPS34,AIMP2,PUS3,WARS2,SBDS,NARS,TRMT5,TRMT10A,TSFM,YARS2,TRIT1,TSEN54,ELAC2,RARS2,POLR3A,POLR1C,EXOSC8,LARS,PNPT1,TRMT1,SARS2
GO Process	GO:0000959	Mitochondrial rna metabolic process	8	41	2.17	2.71e-12	WARS2,TRMT5,TRMT10A,YARS2,TRIT1,ELAC2,PNPT1,SARS2
GO Process	GO:0034641	Cellular nitrogen compound metabolic process	23	3282	0.72	4.43e-12	ASNS,MRPS34,AIMP2,PUS3,WARS2,SBDS,NARS,TRMT5,TRMT10A,TSFM,YARS2,TRIT1,TSEN54,ELAC2,TTC37,RARS2,POLR3A,POLR1C,EXOSC8,LARS,PNPT1,TRMT1,SARS2
GO Process	GO:0006418	tRNA aminoacylation for protein translation	7	46	2023-06-02	6.34e-10	AIMP2,WARS2,NARS,YARS2,RARS2,LARS,SARS2
GO Process	GO:0000963	Mitochondrial rna processing	5	17	2.35	5.70e-08	TRMT5,TRMT10A,TRIT1,ELAC2,PNPT1
GO Process	GO:0043170	Macromolecule metabolic process	24	6137	0.47	1.02e-07	MRPS34,AIMP2,PUS3,WARS2,SBDS,NARS,TRMT5,TRMT10A,TSFM,YARS2,TRIT1,TSEN54,ELAC2,TTC37,FBXL4,RARS2,NFIA,POLR3A,POLR1C,EXOSC8,LARS,PNPT1,TRMT1,SARS2
GO Process	GO:0008033	tRNA processing	7	128	1.61	2.65e-07	PUS3,TRMT5,TRMT10A,TRIT1,TSEN54,ELAC2,TRMT1
[truncated: 60 more rows]

## Sheet: Enrichment subnetwork7 seizure 
#category	term ID	term description	observed gene count	background gene count	strength	false discovery rate	matching proteins in your network (labels)
[truncated: 68 more rows]

[truncated: 6 more sheets: Enrichment subnetwork8 seizure , Enrichment subnetwork9 seizure , Enrichment subnetwork10 seizure, Enrichment subnetwork11 seizure, Enrichment subnetwork12 seizure, Enrichment subnetwork13 seizure]
