# Supplementary material for: Developing a cluster-based approach for deciphering complexity in individuals with neurodevelopmental differences
Source: Front Pediatr. 2023 Sep 18;11:1171920. doi: 10.3389/fped.2023.1171920 (PMC10543689; doi:10.3389/fped.2023.1171920)
Supplement: Supplementary file 10 [file Table10.xlsx]

## Sheet: MCL clusters seizure kmeans
#clustering method	cluster number	cluster color	gene count	protein name	protein description
MCL	1	Red	35	AARS	Alanine--tRNA ligase, cytoplasmic; Catalyzes the attachment of alanine to tRNA(Ala) in a two-step reaction: alanine is first activated by ATP to form Ala- AMP and then transferred to the acceptor end of tRNA(Ala). Also edits incorrectly charged tRNA(Ala) via its editing domain; Belongs to the class-II aminoacyl-tRNA synthetase family
MCL	1	Red	35	ACTA1	Actin, alpha skeletal muscle; Actins are highly conserved proteins that are involved in various types of cell motility and are ubiquitously expressed in all eukaryotic cells
MCL	1	Red	35	AIMP2	Aminoacyl tRNA synthase complex-interacting multifunctional protein 2; Required for assembly and stability of the aminoacyl- tRNA synthase complex. Mediates ubiquitination and degradation of FUBP1, a transcriptional activator of MYC, leading to MYC down-regulation which is required for aveolar type II cell differentiation. Blocks MDM2-mediated ubiquitination and degradation of p53/TP53. Functions…
MCL	1	Red	35	AKT3	RAC-gamma serine/threonine-protein kinase; AKT3 is one of 3 closely related serine/threonine- protein kinases (AKT1, AKT2 and AKT3) called the AKT kinase, and which regulate many processes including metabolism, proliferation, cell survival, growth and angiogenesis. This is mediated through serine and/or threonine phosphorylation of a range of downstream substrates. Over 100 substrate candidates h…
MCL	1	Red	35	ARFGEF1	Brefeldin A-inhibited guanine nucleotide-exchange protein 1; Promotes guanine-nucleotide exchange on ARF1 and ARF3. Promotes the activation of ARF1/ARF3 through replacement of GDP with GTP. Involved in vesicular trafficking. Required for the maintenance of Golgi structure; the function may be independent of its GEF activity. Required for the maturaion of integrin beta-1 in the Golgi. Involved in …
MCL	1	Red	35	BUB1B	Mitotic checkpoint serine/threonine-protein kinase BUB1 beta; Essential component of the mitotic checkpoint. Required for normal mitosis progression. The mitotic checkpoint delays anaphase until all chromosomes are properly attached to the mitotic spindle. One of its checkpoint functions is to inhibit the activity of the anaphase-promoting complex/cyclosome (APC/C) by blocking the binding of CDC2…
MCL	1	Red	35	COASY	Bifunctional coenzyme A synthase; Bifunctional enzyme that catalyzes the fourth and fifth sequential steps of CoA biosynthetic pathway. The fourth reaction is catalyzed by the phosphopantetheine adenylyltransferase, coded by the coaD domain; the fifth reaction is catalyzed by the dephospho-CoA kinase, coded by the coaE domain. May act as a point of CoA biosynthesis regulation; In the central sect…
MCL	1	Red	35	DNA2	DNA replication ATP-dependent helicase/nuclease DNA2; Key enzyme involved in DNA replication and DNA repair in nucleus and mitochondrion. Involved in Okazaki fragments processing by cleaving long flaps that escape FEN1: flaps that are longer than 27 nucleotides are coated by replication protein A complex (RPA), leading to recruit DNA2 which cleaves the flap until it is too short to bind RPA and b…
MCL	1	Red	35	EEF1A2	Elongation factor 1-alpha 2; This protein promotes the GTP-dependent binding of aminoacyl-tRNA to the A-site of ribosomes during protein biosynthesis; Belongs to the TRAFAC class translation factor GTPase superfamily. Classic translation factor GTPase family. EF-Tu/EF-1A subfamily
MCL	1	Red	35	ERBB2	Receptor tyrosine-protein kinase erbB-2; Protein tyrosine kinase that is part of several cell surface receptor complexes, but that apparently needs a coreceptor for ligand binding. Essential component of a neuregulin-receptor complex, although neuregulins do not interact with it alone. GP30 is a potential ligand for this receptor. Regulates outgrowth and stabilization of peripheral microtubules (…
MCL	1	Red	35	FGF13	Fibroblast growth factor 13; Microtubule-binding protein which directly binds tubulin and is involved in both polymerization and stabilization of microtubules. Through its action on microtubules, may participate to the refinement of axons by negatively regulating axonal and leading processes branching. Plays a crucial role in neuron polarization and migration in the cerebral cortex and the hippoc…
MCL	1	Red	35	FSCN2	Fascin-2; Acts as an actin bundling protein. May play a pivotal role in photoreceptor cell-specific events, such as disk morphogenesis; Fascins
MCL	1	Red	35	GTF2H5	General transcription factor IIH subunit 5; Component of the TFIIH basal transcription factor involved in nucleotide excision repair (NER) of DNA and, when complexed to CAK, in RNA transcription by RNA polymerase II. Necessary for the stability of the TFIIH complex and for the presence of normal levels of TFIIH in the cell; General transcription factors
MCL	1	Red	35	HNF1B	Hepatocyte nuclear factor 1-beta; Transcription factor, probably binds to the inverted palindrome 5'-GTTAATNATTAAC-3'; Belongs to the HNF1 homeobox family
MCL	1	Red	35	HNF4A	Hepatocyte nuclear factor 4-alpha; Transcriptionally controlled transcription factor. Binds to DNA sites required for the transcription of alpha 1- antitrypsin, apolipoprotein CIII, transthyretin genes and HNF1- alpha. May be essential for development of the liver, kidney and intestine; Nuclear hormone receptors
MCL	1	Red	35	INS	Insulin; Insulin decreases blood glucose concentration. It increases cell permeability to monosaccharides, amino acids and fatty acids. It accelerates glycolysis, the pentose phosphate cycle, and glycogen synthesis in liver
MCL	1	Red	35	KANSL1	KAT8 regulatory NSL complex subunit 1; As part of the NSL complex it is involved in acetylation of nucleosomal histone H4 on several lysine residues and therefore may be involved in the regulation of transcription
MCL	1	Red	35	KLLN	Killin, p53 regulated dna replication inhibitor; Killin; DNA-binding protein involved in S phase checkpoint control-coupled apoptosis by mediating p53/TP53-induced apoptosis. Has the ability to inhibit DNA synthesis and S phase arrest coupled to apoptosis. Has affinity to both double- and single- stranded DNA
MCL	1	Red	35	NARS2	Probable asparagine--tRNA ligase, mitochondrial; asparaginyl-tRNA synthetase 2, mitochondrial; Belongs to the class-II aminoacyl-tRNA synthetase family
MCL	1	Red	35	NKX2-1	Homeobox protein Nkx-2.1; Transcription factor that binds and activates the promoter of thyroid specific genes such as thyroglobulin, thyroperoxidase, and thyrotropin receptor. Crucial in the maintenance of the thyroid differentiation phenotype. May play a role in lung development and surfactant homeostasis. Forms a regulatory loop with GRHL2 that coordinates lung epithelial cell morphogenesis an…
MCL	1	Red	35	NUP107	Nuclear pore complex protein Nup107; Plays a role in the nuclear pore complex (NPC) assembly and/or maintenance. Required for the assembly of peripheral proteins into the NPC. May anchor NUP62 to the NPC; Belongs to the nucleoporin Nup84/Nup107 family
MCL	1	Red	35	PAX2	Paired box protein Pax-2; Transcription factor that may have a role in kidney cell differentiation. Has a critical role in the development of the urogenital tract, the eyes, and the CNS; PRD class homeoboxes and pseudogenes
MCL	1	Red	35	POU3F3	POU domain, class 3, transcription factor 3; Transcription factor that acts synergistically with SOX11 and SOX4. Plays a role in neuronal development. Is implicated in an enhancer activity at the embryonic met- mesencephalic junction; the enhancer element contains the octamer motif (5'-ATTTGCAT-3') (By similarity); POU class homeoboxes and pseudogenes
MCL	1	Red	35	RAB11B	Ras-related protein Rab-11B; The small GTPases Rab are key regulators of intracellular membrane trafficking, from the formation of transport vesicles to their fusion with membranes. Rabs cycle between an inactive GDP-bound form and an active GTP-bound form that is able to recruit to membranes different set of downstream effectors directly responsible for vesicle formation, movement, tethering and…
MCL	1	Red	35	SLC2A1	Solute carrier family 2, facilitated glucose transporter member 1; Facilitative glucose transporter. This isoform may be responsible for constitutive or basal glucose uptake. Has a very broad substrate specificity; can transport a wide range of aldoses including both pentoses and hexoses; Belongs to the major facilitator superfamily. Sugar transporter (TC 2.A.1.1) family. Glucose transporter subf…
MCL	1	Red	35	SMARCB1	Swi/snf related, matrix associated, actin dependent regulator of chromatin, subfamily b, member 1; SWI/SNF-related matrix-associated actin-dependent regulator of chromatin subfamily B member 1; Core component of the BAF (hSWI/SNF) complex. This ATP- dependent chromatin-remodeling complex plays important roles in cell proliferation and differentiation, in cellular antiviral activities and inhibiti…
MCL	1	Red	35	STAR	Steroidogenic acute regulatory protein, mitochondrial; Plays a key role in steroid hormone synthesis by enhancing the metabolism of cholesterol into pregnenolone. Mediates the transfer of cholesterol from the outer mitochondrial membrane to the inner mitochondrial membrane where it is cleaved to pregnenolone; StAR related lipid transfer domain containing
MCL	1	Red	35	TP53	Cellular tumor antigen p53; Acts as a tumor suppressor in many tumor types; induces growth arrest or apoptosis depending on the physiological circumstances and cell type. Involved in cell cycle regulation as a trans-activator that acts to negatively regulate cell division by controlling a set of genes required for this process. One of the activated genes is an inhibitor of cyclin-dependent kinase…
MCL	1	Red	35	TRRAP	Transformation/transcription domain-associated protein; Adapter protein, which is found in various multiprotein chromatin complexes with histone acetyltransferase activity (HAT), which gives a specific tag for epigenetic transcription activation. Component of the NuA4 histone acetyltransferase complex which is responsible for acetylation of nucleosomal histones H4 and H2A. Plays a central role in…
MCL	1	Red	35	TUBB	Tubulin beta chain; Tubulin is the major constituent of microtubules. It binds two moles of GTP, one at an exchangeable site on the beta chain and one at a non-exchangeable site on the alpha chain; Tubulins
MCL	1	Red	35	WRAP53	Telomerase Cajal body protein 1; Essential component of the telomerase holoenzyme complex, a ribonucleoprotein complex essential for the replication of chromosome termini that elongates telomeres in most eukaryotes. In the telomerase holoenzyme complex, it controls telomerase localization to Cajal body. Required for delivery of TERC to telomeres during S phase and for telomerase activity. Binds s…
MCL	1	Red	35	WWOX	WW domain-containing oxidoreductase; Putative oxidoreductase. Acts as a tumor suppressor and plays a role in apoptosis. Required for normal bone development (By similarity). May function synergistically with p53/TP53 to control genotoxic stress-induced cell death. Plays a role in TGFB1 signaling and TGFB1-mediated cell death. May also play a role in tumor necrosis factor (TNF)-mediated cell death…
MCL	1	Red	35	XPC	DNA repair protein complementing XP-C cells; Involved in global genome nucleotide excision repair (GG-NER) by acting as damage sensing and DNA-binding factor component of the XPC complex. Has only a low DNA repair activity by itself which is stimulated by RAD23B and RAD23A. Has a preference to bind DNA containing a short single-stranded segment but not to damaged oligonucleotides. This feature is…
MCL	1	Red	35	YWHAG	14-3-3 protein gamma; Adapter protein implicated in the regulation of a large spectrum of both general and specialized signaling pathways. Binds to a large number of partners, usually by recognition of a phosphoserine or phosphothreonine motif. Binding generally results in the modulation of the activity of the binding partner; Belongs to the 14-3-3 family
MCL	1	Red	35	ZEB2	Zinc finger E-box-binding homeobox 2; Transcriptional inhibitor that binds to DNA sequence 5'- CACCT-3' in different promoters. Represses transcription of E- cadherin; ZF class homeoboxes and pseudogenes
MCL	2	Brown	16	ATP1A1	Sodium/potassium-transporting ATPase subunit alpha-1; This is the catalytic component of the active enzyme, which catalyzes the hydrolysis of ATP coupled with the exchange of sodium and potassium ions across the plasma membrane. This action creates the electrochemical gradient of sodium and potassium ions, providing the energy for active transport of various nutrients; ATPase Na+/K+ transporting …
MCL	2	Brown	16	CLCN2	Chloride channel protein 2; Voltage-gated chloride channel. Chloride channels have several functions including the regulation of cell volume; membrane potential stabilization, signal transduction and transepithelial transport; Belongs to the chloride channel (TC 2.A.49) family. ClC-2/CLCN2 subfamily
MCL	2	Brown	16	CNTNAP2	Contactin-associated protein-like 2; Required, with CNTNAP1, for radial and longitudinal organization of myelinated axons. Plays a role in the formation of functional distinct domains critical for saltatory conduction of nerve impulses in myelinated nerve fibers. Demarcates the juxtaparanodal region of the axo-glial junction; Belongs to the neurexin family
MCL	2	Brown	16	GABRA1	Gamma-aminobutyric acid receptor subunit alpha-1; Component of the heteropentameric receptor for GABA, the major inhibitory neurotransmitter in the vertebrate brain. Functions also as histamine receptor and mediates cellular responses to histamine. Functions as receptor for diazepines and various anesthetics, such as pentobarbital; these are bound at a separate allosteric effector binding site. F…
MCL	2	Brown	16	GABRB3	Gamma-aminobutyric acid receptor subunit beta-3; Component of the heteropentameric receptor for GABA, the major inhibitory neurotransmitter in the vertebrate brain. Functions also as histamine receptor and mediates cellular responses to histamine. Functions as receptor for diazepines and various anesthetics, such as pentobarbital; these are bound at a separate allosteric effector binding site. Fu…
MCL	2	Brown	16	GABRG2	Gamma-aminobutyric acid receptor subunit gamma-2; Component of the heteropentameric receptor for GABA, the major inhibitory neurotransmitter in the vertebrate brain. Functions also as histamine receptor and mediates cellular responses to histamine. Functions as receptor for diazepines and various anesthetics, such as pentobarbital; these are bound at a separate allosteric effector binding site. F…
MCL	2	Brown	16	GRIA3	Glutamate receptor 3; Receptor for glutamate that functions as ligand-gated ion channel in the central nervous system and plays an important role in excitatory synaptic transmission. L-glutamate acts as an excitatory neurotransmitter at many synapses in the central nervous system. Binding of the excitatory neurotransmitter L- glutamate induces a conformation change, leading to the opening of the …
MCL	2	Brown	16	GRIN1	Glutamate receptor ionotropic, NMDA 1; Component of NMDA receptor complexes that function as heterotetrameric, ligand-gated ion channels with high calcium permeability and voltage-dependent sensitivity to magnesium. Channel activation requires binding of the neurotransmitter glutamate to the epsilon subunit, glycine binding to the zeta subunit, plus membrane depolarization to eliminate channel in…
MCL	2	Brown	16	KCNH1	Potassium voltage-gated channel subfamily H member 1; Pore-forming (alpha) subunit of a voltage-gated delayed rectifier potassium channel. Channel properties are modulated by subunit assembly. Mediates IK(NI) current in myoblasts. Involved in the regulation of cell proliferation and differentiation, in particular adipogenic and osteogenic differentiation in bone marrow-derived mesenchymal stem ce…
MCL	2	Brown	16	KCNQ2	Potassium voltage-gated channel subfamily KQT member 2; Associates with KCNQ3 to form a potassium channel with essentially identical properties to the channel underlying the native M-current, a slowly activating and deactivating potassium conductance which plays a critical role in determining the subthreshold electrical excitability of neurons as well as the responsiveness to synaptic inputs. The…
MCL	2	Brown	16	MPDZ	Multiple pdz domain crumbs cell polarity complex component; Multiple PDZ domain protein; Interacts with HTR2C and provokes its clustering at the cell surface (By similarity). Member of the NMDAR signaling complex that may play a role in control of AMPAR potentiation and synaptic plasticity in excitatory synapses
MCL	2	Brown	16	SCN8A	Sodium channel protein type 8 subunit alpha; Mediates the voltage-dependent sodium ion permeability of excitable membranes. Assuming opened or closed conformations in response to the voltage difference across the membrane, the protein forms a sodium-selective channel through which Na(+) ions may pass in accordance with their electrochemical gradient. In macrophages and melanoma cells, isoform 5 m…
MCL	2	Brown	16	SLC1A2	Excitatory amino acid transporter 2; Sodium-dependent, high-affinity amino acid transporter that mediates the uptake of L-glutamate and also L-aspartate and D-aspartate. Functions as a symporter that transports one amino acid molecule together with two or three Na(+) ions and one proton, in parallel with the counter-transport of one K(+) ion. Mediates Cl(-) flux that is not coupled to amino acid …
MCL	2	Brown	16	SLC5A6	Sodium-dependent multivitamin transporter; Transports pantothenate, biotin and lipoate in the presence of sodium; Solute carriers
MCL	2	Brown	16	SLC6A5	Solute carrier family 6 (neurotransmitter transporter, glycine) member 5/9; Sodium- and chloride-dependent glycine transporter 2; Terminates the action of glycine by its high affinity sodium-dependent reuptake into presynaptic terminals. May be responsible for the termination of neurotransmission at strychnine-sensitive glycinergic synapses; Belongs to the sodium:neurotransmitter symporter (SNF) …
MCL	2	Brown	16	STX1B	Syntaxin-1B; Potentially involved in docking of synaptic vesicles at presynaptic active zones. May mediate Ca(2+)-regulation of exocytosis acrosomal reaction in sperm (By similarity); Belongs to the syntaxin family
MCL	3	Dark Golden Rod	8	B3GALT6	Galactosylxylosylprotein 3-beta-galactosyltransferase; Beta-1,3-galactosyltransferase 6; Beta-1,3-galactosyltransferase that transfers galactose from UDP-galactose to substrates with a terminal beta-linked galactose residue. Has a preference for galactose-beta-1,4-xylose that is found in the linker region of glycosaminoglycans, such as heparan sulfate and chondroitin sulfate. Has no activity towa…
MCL	3	Dark Golden Rod	8	COL11A2	Collagen alpha-2(XI) chain; May play an important role in fibrillogenesis by controlling lateral growth of collagen II fibrils; Collagens
MCL	3	Dark Golden Rod	8	COL13A1	Collagen alpha-1(XIII) chain; Involved in cell-matrix and cell-cell adhesion interactions that are required for normal development. May participate in the linkage between muscle fiber and basement membrane. May play a role in endochondral ossification of bone and branching morphogenesis of lung. Binds heparin. At neuromuscular junctions, may play a role in acetylcholine receptor clustering; Colla…
MCL	3	Dark Golden Rod	8	COLQ	Acetylcholinesterase collagenic tail peptide; Anchors the catalytic subunits of asymmetric AChE to the synaptic basal lamina
MCL	3	Dark Golden Rod	8	EXTL3	Alpha-1,4-N-acetylglucosaminyltransferase EXTL3; Exostosin-like 3; Glycosyltransferase which regulates the biosynthesis of heparan sulfate (HS). Important for both skeletal development and hematopoiesis, through the formation of HS proteoglycans (HSPGs). Required for the function of REG3A in regulating keratinocyte proliferation and differentiation
MCL	3	Dark Golden Rod	8	GJB3	Gap junction beta-3 protein; One gap junction consists of a cluster of closely packed pairs of transmembrane channels, the connexons, through which materials of low MW diffuse from one cell to a neighboring cell; Deafness associated genes
MCL	3	Dark Golden Rod	8	HSPG2	Basement membrane-specific heparan sulfate proteoglycan core protein; Integral component of basement membranes. Component of the glomerular basement membrane (GBM), responsible for the fixed negative electrostatic membrane charge, and which provides a barrier which is both size- and charge-selective. It serves as an attachment substrate for cells. Plays essential roles in vascularization. Critica…
MCL	3	Dark Golden Rod	8	POMGNT1	Protein O-linked-mannose beta-1,2-N-acetylglucosaminyltransferase 1; Participates in O-mannosyl glycosylation. May be responsible for the synthesis of the GlcNAc(beta1-2)Man(alpha1-)O- Ser/Thr moiety on alpha-dystroglycan and other O-mannosylated proteins. Is specific for alpha linked terminal mannose and does not have MGAT3, MGAT4, MGAT5, MGAT7 or MGAT8 activity; Belongs to the glycosyltransfera…
MCL	4	Yellow	7	ALG11	GDP-Man:Man(3)GlcNAc(2)-PP-Dol alpha-1,2-mannosyltransferase; Mannosyltransferase involved in the last steps of the synthesis of Man5GlcNAc(2)-PP-dolichol core oligosaccharide on the cytoplasmic face of the endoplasmic reticulum. Catalyzes the addition of the 4th and 5th mannose residues to the dolichol- linked oligosaccharide chain; Belongs to the glycosyltransferase group 1 family. Glycosyltran…
MCL	4	Yellow	7	DPM2	Dolichol phosphate-mannose biosynthesis regulatory protein; Regulates the biosynthesis of dolichol phosphate- mannose. Regulatory subunit of the dolichol-phosphate mannose (DPM) synthase complex; essential for the ER localization and stable expression of DPM1. When associated with the GPI-GlcNAc transferase (GPI-GnT) complex enhances but is not essential for its activity
MCL	4	Yellow	7	MPI	Mannose-6-phosphate isomerase; Involved in the synthesis of the GDP-mannose and dolichol-phosphate-mannose required for a number of critical mannosyl transfer reactions; Belongs to the mannose-6-phosphate isomerase type 1 family
MCL	4	Yellow	7	PGAP3	Post-GPI attachment to proteins factor 3; Involved in the lipid remodeling steps of GPI-anchor maturation. Lipid remodeling steps consist in the generation of 2 saturated fatty chains at the sn-2 position of GPI-anchors proteins. Required for phospholipase A2 activity that removes an acyl-chain at the sn-2 position of GPI-anchors during the remodeling of GPI (Probable); Belongs to the PGAP3 family
MCL	4	Yellow	7	PIGA	Phosphatidylinositol N-acetylglucosaminyltransferase subunit A; Necessary for the synthesis of N-acetylglucosaminyl- phosphatidylinositol, the very early intermediate in GPI-anchor biosynthesis; Belongs to the glycosyltransferase group 1 family. Glycosyltransferase 4 subfamily
MCL	4	Yellow	7	PIGT	Phosphatidylinositol glycan anchor biosynthesis class t; GPI transamidase component PIG-T; Component of the GPI transamidase complex. Essential for transfer of GPI to proteins, particularly for formation of carbonyl intermediates; Belongs to the PIGT family
MCL	4	Yellow	7	SLC35A1	Solute carrier family 35 (udp-sugar transporter), member a1/2/3; CMP-sialic acid transporter; Transports CMP-sialic acid from the cytosol into Golgi vesicles where glycosyltransferases function; Belongs to the nucleotide-sugar transporter family. SLC35A subfamily
MCL	5	Olive	6	AGA	N(4)-(beta-N-acetylglucosaminyl)-L-asparaginase; Cleaves the GlcNAc-Asn bond which joins oligosaccharides to the peptide of asparagine-linked glycoproteins; Belongs to the Ntn-hydrolase family
MCL	5	Olive	6	CAD	Carbamoyl-phosphate synthetase 2, aspartate transcarbamylase, and dihydroorotase; CAD protein; This protein is a "fusion" protein encoding four enzymatic activities of the pyrimidine pathway (GATase, CPSase, ATCase and DHOase); In the central section; belongs to the metallo- dependent hydrolases superfamily. DHOase family. CAD subfamily
MCL	5	Olive	6	GALE	UDP-galactose-4-epimerase; UDP-glucose 4-epimerase; Catalyzes two distinct but analogous reactions: the reversible epimerization of UDP-glucose to UDP-galactose and the reversible epimerization of UDP-N-acetylglucosamine to UDP-N- acetylgalactosamine. The reaction with UDP-Gal plays a critical role in the Leloir pathway of galactose catabolism in which galactose is converted to the glycolytic int…
MCL	5	Olive	6	PYCR1	Pyrroline-5-carboxylate reductase 1, mitochondrial; Housekeeping enzyme that catalyzes the last step in proline biosynthesis. Can utilize both NAD and NADP, but has higher affinity for NAD. Involved in the cellular response to oxidative stress
MCL	5	Olive	6	UGP2	UTP--glucose-1-phosphate uridylyltransferase; Plays a central role as a glucosyl donor in cellular metabolic pathways; Belongs to the UDPGP type 1 family
MCL	5	Olive	6	UMPS	Uridine 5'-monophosphate synthase; Uridine monophosphate synthetase; In the C-terminal section; belongs to the OMP decarboxylase family
MCL	6	Light Green	5	CCDC115	Coiled-coil domain-containing protein 115; Accessory component of the proton-transporting vacuolar (V)-ATPase protein pump involved in intracellular iron homeostasis. In aerobic conditions, required for intracellular iron homeostasis, thus triggering the activity of Fe(2+) prolyl hydroxylase (PHD) enzymes, and leading to HIF1A hydroxylation and subsequent proteasomal degradation. Necessary for en…
MCL	6	Light Green	5	COX4I2	Cytochrome c oxidase subunit 4 isoform 2, mitochondrial; This protein is one of the nuclear-coded polypeptide chains of cytochrome c oxidase, the terminal oxidase in mitochondrial electron transport
MCL	6	Light Green	5	ETFB	Electron transfer flavoprotein subunit beta; Heterodimeric electron transfer flavoprotein that accepts electrons from several mitochondrial dehydrogenases, including acyl-CoA dehydrogenases, glutaryl-CoA and sarcosine dehydrogenase. It transfers the electrons to the main mitochondrial respiratory chain via ETF-ubiquinone oxidoreductase (Probable). Required for normal mitochondrial fatty acid oxid…
MCL	6	Light Green	5	NDUFS2	NADH dehydrogenase [ubiquinone] iron-sulfur protein 2, mitochondrial; Core subunit of the mitochondrial membrane respiratory chain NADH dehydrogenase (Complex I) that is believed to belong to the minimal assembly required for catalysis. Complex I functions in the transfer of electrons from NADH to the respiratory chain. The immediate electron acceptor for the enzyme is believed to be ubiquinone
MCL	6	Light Green	5	SCO1	Protein SCO1 homolog, mitochondrial; Thought to play a role in cellular copper homeostasis, mitochondrial redox signaling or insertion of copper into the active site of COX; Belongs to the SCO1/2 family
MCL	7	Green 2	4	CDK5RAP2	CDK5 regulatory subunit-associated protein 2; Potential regulator of CDK5 activity via its interaction with CDK5R1. Negative regulator of centriole disengagement (licensing) which maintains centriole engagement and cohesion. Involved in regulation of mitotic spindle orientation (By similarity). Plays a role in the spindle checkpoint activation by acting as a transcriptional regulator of both BUBR…
MCL	7	Green 2	4	POC1A	POC1 centriolar protein homolog A; Plays an important role in centriole assembly and/or stability and ciliogenesis. Involved in early steps of centriole duplication, as well as in the later steps of centriole length control. Acts in concert with POC1B to ensure centriole integrity and proper mitotic spindle formation; Belongs to the WD repeat POC1 family
MCL	7	Green 2	4	SLC25A19	Mitochondrial thiamine pyrophosphate carrier; Mitochondrial transporter mediating uptake of thiamine pyrophosphate (ThPP) into mitochondria; Solute carriers
MCL	7	Green 2	4	TUBG1	Tubulin gamma-1 chain; Tubulin is the major constituent of microtubules. The gamma chain is found at microtubule organizing centers (MTOC) such as the spindle poles or the centrosome. Pericentriolar matrix component that regulates alpha/beta chain minus-end nucleation, centrosome duplication and spindle formation; Tubulins
MCL	8	Green	3	HESX1	Homeobox expressed in ES cells 1; Required for the normal development of the forebrain, eyes and other anterior structures such as the olfactory placodes and pituitary gland. Possible transcriptional repressor. Binds to the palindromic PIII sequence, 5'-AGCTTGAGTCTAATTGAATTAACTGTAC-3'. HESX1 and PROP1 bind as heterodimers on this palindromic site, and, in vitro, HESX1 can antagonize PROP1 activat…
MCL	8	Green	3	PDHB	Pyruvate dehydrogenase E1 component subunit beta, mitochondrial; The pyruvate dehydrogenase complex catalyzes the overall conversion of pyruvate to acetyl-CoA and CO(2), and thereby links the glycolytic pathway to the tricarboxylic cycle
MCL	8	Green	3	POU1F1	Pituitary-specific positive transcription factor 1; Transcription factor involved in the specification of the lactotrope, somatotrope, and thyrotrope phenotypes in the developing anterior pituitary. Specifically binds to the consensus sequence 5'-TAAAT-3'. Activates growth hormone and prolactin genes; Belongs to the POU transcription factor family. Class- 1 subfamily
MCL	9	Blue	2	FLNA	Filamin-A; Promotes orthogonal branching of actin filaments and links actin filaments to membrane glycoproteins. Anchors various transmembrane proteins to the actin cytoskeleton and serves as a scaffold for a wide range of cytoplasmic signaling proteins. Interaction with FLNA may allow neuroblast migration from the ventricular zone into the cortical plate. Tethers cell surface- localized furin, m…
MCL	9	Blue	2	ROR2	Tyrosine-protein kinase transmembrane receptor ROR2; Tyrosine-protein kinase receptor which may be involved in the early formation of the chondrocytes. It seems to be required for cartilage and growth plate development (By similarity). Phosphorylates YWHAB, leading to induction of osteogenesis and bone formation. In contrast, has also been shown to have very little tyrosine kinase activity in vit…
MCL	10	Light Sky Blue	2	PACS2	Phosphofurin acidic cluster sorting protein 2; Multifunctional sorting protein that controls the endoplasmic reticulum (ER)-mitochondria communication, including the apposition of mitochondria with the ER and ER homeostasis. In addition, in response to apoptic inducer, translocates BIB to mitochondria, which initiates a sequence of events including the formation of mitochondrial truncated BID, th…
MCL	10	Light Sky Blue	2	WDR37	WD repeat-containing protein 37; WD repeat domain containing
MCL	11	Orchid 2	2	HMGCL	Hydroxymethylglutaryl-CoA lyase, mitochondrial; Key enzyme in ketogenesis (ketone body formation). Terminal step in leucine catabolism. Ketone bodies (beta- hydroxybutyrate, acetoacetate and acetone) are essential as an alternative source of energy to glucose, as lipid precursors and as regulators of metabolism
MCL	11	Orchid 2	2	PEX10	Peroxisome biogenesis factor 10; Somewhat implicated in the biogenesis of peroxisomes; Peroxins
MCL	12	Purple	2	KIAA0753	Protein moonraker; Involved in centriole duplication. Positively regulates CEP63 centrosomal localization. Required for WDR62 centrosomal localization and promotes the centrosomal localization of CDK2
MCL	12	Purple	2	PIBF1	Progesterone immunomodulatory binding factor 1; Progesterone-induced-blocking factor 1; Isoform 1: Pericentriolar protein required to maintain mitotic spindle pole integrity. Required for the centrosomal accumulation of PCM1 and the recruitment of centriolar satellite proteins such as BBS4. Via association with PCM1 may be involved in primary cilia formation. Required for CEP63 centrosomal locali…
MCL	13	Orchid	2	CBSL	Cystathionine beta-synthase; Hydro-lyase catalyzing the first step of the transsulfuration pathway, where the hydroxyl group of L-serine is displaced by L- homocysteine in a beta-replacement reaction to form L-cystathionine, the precursor of L-cysteine. This catabolic route allows the elimination of L-methionine and the toxic metabolite L-homocysteine. Also involved in the production of hydrogen …
MCL	13	Orchid	2	MAT1A	S-adenosylmethionine synthase isoform type-1; Catalyzes the formation of S-adenosylmethionine from methionine and ATP. The reaction comprises two steps that are both catalyzed by the same enzyme: formation of S-adenosylmethionine (AdoMet) and triphosphate, and subsequent hydrolysis of the triphosphate
MCL	14	Pink	2	INPP5K	Inositol polyphosphate 5-phosphatase K; Inositol 5-phosphatase which acts on inositol 1,4,5- trisphosphate, inositol 1,3,4,5-tetrakisphosphate, phosphatidylinositol 4,5-bisphosphate and phosphatidylinositol 3,4,5-trisphosphate. Has 6-fold higher affinity for phosphatidylinositol 4,5-bisphosphate than for inositol 1,4,5- trisphosphate. Negatively regulates assembly of the actin cytoskeleton. Contr…
MCL	14	Pink	2	VPS53	Vacuolar protein sorting-associated protein 53 homolog; Acts as component of the GARP complex that is involved in retrograde transport from early and late endosomes to the trans-Golgi network (TGN). The GARP complex is required for the maintenance of the cycling of mannose 6-phosphate receptors between the TGN and endosomes, this cycling is necessary for proper lysosomal sorting of acid hydrolase…

## Sheet: Enrichment subnetwork1 seizure 
#category	term ID	term description	observed gene count	background gene count	strength	false discovery rate	matching proteins in your network (labels)
GO Biological Process
GO Process	GO:0016043	Cellular component organization	26	5447	0.43	0.00021	AIMP2,NUP107,ARFGEF1,KANSL1,SMARCB1,AKT3,TP53,ERBB2,STAR,XPC,BUB1B,YWHAG,FGF13,WRAP53,FSCN2,TUBB,NKX2-1,DNA2,TRRAP,ACTA1,PAX2,INS,SLC2A1,ZEB2,GTF2H5,HNF1B
GO Process	GO:0031328	Positive regulation of cellular biosynthetic process	16	2005	0.65	0.00039	ARFGEF1,SMARCB1,TP53,ERBB2,STAR,XPC,HNF4A,WRAP53,NKX2-1,DNA2,POU3F3,PAX2,INS,ZEB2,WWOX,HNF1B
GO Process	GO:0010557	Positive regulation of macromolecule biosynthetic process	15	1906	0.64	0.00087	ARFGEF1,SMARCB1,TP53,ERBB2,XPC,HNF4A,WRAP53,NKX2-1,DNA2,POU3F3,PAX2,INS,ZEB2,WWOX,HNF1B
GO Process	GO:0007420	Brain development	10	745	0.88	0.0011	AARS,TP53,STAR,FGF13,NKX2-1,POU3F3,PAX2,SLC2A1,ZEB2,HNF1B
GO Process	GO:0007417	Central nervous system development	11	988	0.79	0.0012	AARS,TP53,ERBB2,STAR,FGF13,NKX2-1,POU3F3,PAX2,SLC2A1,ZEB2,HNF1B
GO Process	GO:0022607	Cellular component assembly	16	2359	0.58	0.0012	AIMP2,NUP107,SMARCB1,TP53,XPC,YWHAG,FGF13,WRAP53,FSCN2,TUBB,DNA2,TRRAP,ACTA1,SLC2A1,GTF2H5,HNF1B
GO Process	GO:0031325	Positive regulation of cellular metabolic process	19	3413	0.49	0.0012	EEF1A2,AIMP2,ARFGEF1,SMARCB1,TP53,ERBB2,STAR,XPC,HNF4A,FGF13,WRAP53,NKX2-1,DNA2,POU3F3,PAX2,INS,ZEB2,WWOX,HNF1B
GO Process	GO:0031326	Regulation of cellular biosynthetic process	21	4125	0.45	0.0012	EEF1A2,NUP107,AARS,ARFGEF1,SMARCB1,TP53,ERBB2,STAR,XPC,HNF4A,WRAP53,NKX2-1,DNA2,TRRAP,POU3F3,PAX2,INS,ZEB2,WWOX,GTF2H5,HNF1B
GO Process	GO:0009893	Positive regulation of metabolic process	20	3893	0.46	0.0013	EEF1A2,AIMP2,ARFGEF1,SMARCB1,TP53,ERBB2,STAR,XPC,HNF4A,FGF13,WRAP53,NKX2-1,DNA2,POU3F3,ACTA1,PAX2,INS,ZEB2,WWOX,HNF1B
GO Process	GO:2000112	Regulation of cellular macromolecule biosynthetic process	20	3878	0.46	0.0013	EEF1A2,NUP107,AARS,ARFGEF1,SMARCB1,TP53,ERBB2,XPC,HNF4A,WRAP53,NKX2-1,DNA2,TRRAP,POU3F3,PAX2,INS,ZEB2,WWOX,GTF2H5,HNF1B
GO Process	GO:0010604	Positive regulation of macromolecule metabolic process	19	3600	0.47	0.0017	AIMP2,ARFGEF1,SMARCB1,TP53,ERBB2,STAR,XPC,HNF4A,FGF13,WRAP53,NKX2-1,DNA2,POU3F3,ACTA1,PAX2,INS,ZEB2,WWOX,HNF1B
GO Process	GO:0048523	Negative regulation of cellular process	22	4874	0.4	0.0018	AIMP2,AARS,ARFGEF1,SMARCB1,AKT3,TP53,ERBB2,STAR,XPC,BUB1B,YWHAG,HNF4A,FGF13,NKX2-1,DNA2,POU3F3,PAX2,INS,KLLN,ZEB2,WWOX,HNF1B
GO Process	GO:0060255	Regulation of macromolecule metabolic process	25	6407	0.34	0.0022	EEF1A2,AIMP2,NUP107,AARS,ARFGEF1,SMARCB1,TP53,ERBB2,STAR,XPC,YWHAG,HNF4A,FGF13,WRAP53,NKX2-1,DNA2,TRRAP,POU3F3,ACTA1,PAX2,INS,ZEB2,WWOX,GTF2H5,HNF1B
GO Process	GO:0007399	Nervous system development	15	2371	0.55	0.0034	AARS,ARFGEF1,SMARCB1,TP53,ERBB2,STAR,YWHAG,FGF13,FSCN2,NKX2-1,POU3F3,PAX2,SLC2A1,ZEB2,HNF1B
GO Process	GO:0009749	Response to glucose	5	138	1.31	0.0034	STAR,HNF4A,RAB11B,PAX2,HNF1B
GO Process	GO:0000002	Mitochondrial genome maintenance	3	20	1.92	0.0048	AKT3,TP53,DNA2
GO Process	GO:0031323	Regulation of cellular metabolic process	24	6239	0.33	0.0049	EEF1A2,AIMP2,NUP107,AARS,ARFGEF1,SMARCB1,TP53,ERBB2,STAR,XPC,YWHAG,HNF4A,FGF13,WRAP53,NKX2-1,DNA2,TRRAP,POU3F3,PAX2,INS,ZEB2,WWOX,GTF2H5,HNF1B
GO Process	GO:0048513	Animal organ development	17	3197	0.47	0.0049	AIMP2,NUP107,AARS,TP53,ERBB2,STAR,HNF4A,FGF13,FSCN2,NKX2-1,POU3F3,ACTA1,PAX2,SLC2A1,ZEB2,WWOX,HNF1B
GO Process	GO:0048731	System development	20	4426	0.4	0.0052	AIMP2,NUP107,AARS,ARFGEF1,SMARCB1,TP53,ERBB2,STAR,YWHAG,HNF4A,FGF13,FSCN2,NKX2-1,POU3F3,ACTA1,PAX2,SLC2A1,ZEB2,WWOX,HNF1B
GO Process	GO:0051276	Chromosome organization	10	1066	0.72	0.0057	NUP107,KANSL1,SMARCB1,TP53,XPC,BUB1B,WRAP53,DNA2,TRRAP,GTF2H5
GO Process	GO:0021543	Pallium development	5	171	1.21	0.0062	FGF13,NKX2-1,POU3F3,SLC2A1,ZEB2
GO Process	GO:0044260	Cellular macromolecule metabolic process	21	4976	0.37	0.0063	EEF1A2,AIMP2,NUP107,AARS,KANSL1,SMARCB1,AKT3,TP53,ERBB2,NARS2,XPC,BUB1B,HNF4A,FGF13,WRAP53,RAB11B,DNA2,TRRAP,PAX2,INS,GTF2H5
GO Process	GO:0045935	Positive regulation of nucleobase-containing compound metabolic process	13	1927	0.58	0.0063	SMARCB1,TP53,ERBB2,XPC,HNF4A,WRAP53,NKX2-1,POU3F3,PAX2,INS,ZEB2,WWOX,HNF1B
GO Process	GO:0010628	Positive regulation of gene expression	14	2337	0.52	0.0082	SMARCB1,TP53,ERBB2,STAR,XPC,HNF4A,NKX2-1,POU3F3,ACTA1,PAX2,INS,ZEB2,WWOX,HNF1B
GO Process	GO:0042593	Glucose homeostasis	5	188	1.17	0.0082	STAR,HNF4A,RAB11B,PAX2,INS
GO Process	GO:0080090	Regulation of primary metabolic process	23	6032	0.33	0.0082	EEF1A2,AIMP2,NUP107,AARS,ARFGEF1,SMARCB1,TP53,ERBB2,STAR,XPC,YWHAG,HNF4A,FGF13,WRAP53,NKX2-1,TRRAP,POU3F3,PAX2,INS,ZEB2,WWOX,GTF2H5,HNF1B
GO Process	GO:0048522	Positive regulation of cellular process	22	5579	0.34	0.0083	EEF1A2,AIMP2,ARFGEF1,SMARCB1,AKT3,TP53,ERBB2,STAR,XPC,YWHAG,HNF4A,FGF13,WRAP53,NKX2-1,DNA2,POU3F3,PAX2,INS,ZEB2,WWOX,GTF2H5,HNF1B
GO Process	GO:0006996	Organelle organization	17	3450	0.44	0.0088	NUP107,ARFGEF1,KANSL1,SMARCB1,AKT3,TP53,XPC,BUB1B,YWHAG,FGF13,WRAP53,FSCN2,TUBB,DNA2,TRRAP,ACTA1,GTF2H5
GO Process	GO:0009719	Response to endogenous stimulus	11	1447	0.63	0.0091	TP53,ERBB2,STAR,YWHAG,HNF4A,NKX2-1,ACTA1,PAX2,INS,SLC2A1,WWOX
GO Process	GO:0048518	Positive regulation of biological process	23	6112	0.32	0.0091	EEF1A2,AIMP2,ARFGEF1,SMARCB1,AKT3,TP53,ERBB2,STAR,XPC,YWHAG,HNF4A,FGF13,WRAP53,NKX2-1,DNA2,POU3F3,ACTA1,PAX2,INS,ZEB2,WWOX,GTF2H5,HNF1B
GO Process	GO:1900212	Negative regulation of mesenchymal cell apoptotic process involved in metanephros development	2	3	2.57	0.0092	PAX2,HNF1B
GO Process	GO:0006281	DNA repair	7	522	0.87	0.0100	SMARCB1,TP53,XPC,WRAP53,DNA2,TRRAP,GTF2H5
GO Process	GO:0044238	Primary metabolic process	25	7332	0.28	0.0129	EEF1A2,AIMP2,NUP107,AARS,KANSL1,SMARCB1,AKT3,TP53,ERBB2,STAR,NARS2,XPC,BUB1B,HNF4A,FGF13,WRAP53,RAB11B,NKX2-1,DNA2,TRRAP,PAX2,INS,SLC2A1,COASY,GTF2H5
GO Process	GO:0044271	Cellular nitrogen compound biosynthetic process	11	1522	0.61	0.0129	EEF1A2,AIMP2,AARS,SMARCB1,TP53,NARS2,HNF4A,WRAP53,PAX2,COASY,GTF2H5
GO Process	GO:0072040	Negative regulation of mesenchymal cell apoptotic process involved in nephron morphogenesis	2	4	2.45	0.0129	PAX2,HNF1B
GO Process	GO:0051171	Regulation of nitrogen compound metabolic process	22	5836	0.32	0.0136	EEF1A2,AIMP2,NUP107,AARS,ARFGEF1,SMARCB1,TP53,ERBB2,XPC,YWHAG,HNF4A,FGF13,WRAP53,NKX2-1,TRRAP,POU3F3,PAX2,INS,ZEB2,WWOX,GTF2H5,HNF1B
GO Process	GO:0051173	Positive regulation of nitrogen compound metabolic process	16	3239	0.44	0.0136	AIMP2,ARFGEF1,SMARCB1,TP53,ERBB2,XPC,HNF4A,FGF13,WRAP53,NKX2-1,POU3F3,PAX2,INS,ZEB2,WWOX,HNF1B
GO Process	GO:0032392	DNA geometric change	4	114	1.29	0.0137	TP53,XPC,DNA2,GTF2H5
GO Process	GO:0021987	Cerebral cortex development	4	116	1.29	0.0144	FGF13,NKX2-1,POU3F3,SLC2A1
GO Process	GO:0021795	Cerebral cortex cell migration	3	42	2023-06-01	0.0150	FGF13,NKX2-1,POU3F3
GO Process	GO:0034645	Cellular macromolecule biosynthetic process	11	1592	0.59	0.0150	EEF1A2,AIMP2,AARS,SMARCB1,TP53,NARS2,HNF4A,WRAP53,DNA2,PAX2,GTF2H5
GO Process	GO:0035564	Regulation of kidney size	2	5	2.35	0.0150	PAX2,HNF1B
GO Process	GO:0045893	Positive regulation of transcription, dna-templated	11	1587	0.59	0.0150	SMARCB1,TP53,ERBB2,XPC,HNF4A,NKX2-1,POU3F3,PAX2,ZEB2,WWOX,HNF1B
GO Process	GO:0060510	Type ii pneumocyte differentiation	2	5	2.35	0.0150	AIMP2,NKX2-1
GO Process	GO:0065003	Protein-containing complex assembly	10	1293	0.64	0.0150	AIMP2,NUP107,SMARCB1,TP53,XPC,FGF13,TRRAP,SLC2A1,GTF2H5,HNF1B
GO Process	GO:0072179	Nephric duct formation	2	5	2.35	0.0150	PAX2,HNF1B
GO Process	GO:0072221	Metanephric distal convoluted tubule development	2	5	2.35	0.0150	POU3F3,PAX2
GO Process	GO:0044237	Cellular metabolic process	25	7513	0.27	0.0155	EEF1A2,AIMP2,NUP107,AARS,KANSL1,SMARCB1,AKT3,TP53,ERBB2,STAR,NARS2,XPC,BUB1B,HNF4A,FGF13,WRAP53,RAB11B,NKX2-1,DNA2,TRRAP,PAX2,INS,SLC2A1,COASY,GTF2H5
GO Process	GO:0044249	Cellular biosynthetic process	14	2611	0.48	0.0159	EEF1A2,AIMP2,AARS,SMARCB1,TP53,STAR,NARS2,HNF4A,WRAP53,DNA2,PAX2,SLC2A1,COASY,GTF2H5
GO Process	GO:0045165	Cell fate commitment	5	248	2023-05-01	0.0159	TP53,FGF13,NKX2-1,PAX2,HNF1B
GO Process	GO:0072006	Nephron development	4	126	1.25	0.0159	NUP107,POU3F3,PAX2,HNF1B
GO Process	GO:0043504	Mitochondrial dna repair	2	6	2.27	0.0160	TP53,DNA2
GO Process	GO:0006418	tRNA aminoacylation for protein translation	3	46	1.56	0.0162	AIMP2,AARS,NARS2
GO Process	GO:0009987	Cellular process	35	15024	0.11	0.0167	EEF1A2,AIMP2,NUP107,AARS,ARFGEF1,KANSL1,SMARCB1,AKT3,TP53,ERBB2,STAR,NARS2,XPC,BUB1B,YWHAG,HNF4A,FGF13,WRAP53,RAB11B,FSCN2,TUBB,NKX2-1,DNA2,TRRAP,POU3F3,ACTA1,PAX2,INS,KLLN,SLC2A1,ZEB2,WWOX,COASY,GTF2H5,HNF1B
GO Process	GO:0007548	Sex differentiation	5	259	2023-03-01	0.0168	NUP107,STAR,HNF4A,NKX2-1,HNF1B
GO Process	GO:0010941	Regulation of cell death	11	1696	0.56	0.0189	EEF1A2,AIMP2,AARS,TP53,STAR,YWHAG,POU3F3,PAX2,INS,WWOX,HNF1B
GO Process	GO:0048511	Rhythmic process	5	271	2023-01-01	0.0189	TP53,STAR,HNF4A,NKX2-1,HNF1B
GO Process	GO:0050789	Regulation of biological process	31	11475	0.18	0.0189	EEF1A2,AIMP2,NUP107,AARS,ARFGEF1,SMARCB1,AKT3,TP53,ERBB2,STAR,XPC,BUB1B,YWHAG,HNF4A,FGF13,WRAP53,RAB11B,TUBB,NKX2-1,DNA2,TRRAP,POU3F3,ACTA1,PAX2,INS,KLLN,SLC2A1,ZEB2,WWOX,GTF2H5,HNF1B
GO Process	GO:0070201	Regulation of establishment of protein localization	7	642	0.78	0.0189	TP53,ERBB2,YWHAG,HNF4A,WRAP53,INS,SLC2A1
GO Process	GO:0008152	Metabolic process	26	8298	0.24	0.0199	EEF1A2,AIMP2,NUP107,AARS,KANSL1,SMARCB1,AKT3,TP53,ERBB2,STAR,NARS2,XPC,BUB1B,HNF4A,FGF13,WRAP53,RAB11B,NKX2-1,DNA2,TRRAP,PAX2,INS,SLC2A1,WWOX,COASY,GTF2H5
GO Process	GO:0048793	Pronephros development	2	8	2.15	0.0202	PAX2,HNF1B
GO Process	GO:0071704	Organic substance metabolic process	25	7755	0.26	0.0202	EEF1A2,AIMP2,NUP107,AARS,KANSL1,SMARCB1,AKT3,TP53,ERBB2,STAR,NARS2,XPC,BUB1B,HNF4A,FGF13,WRAP53,RAB11B,NKX2-1,DNA2,TRRAP,PAX2,INS,SLC2A1,COASY,GTF2H5
GO Process	GO:1901576	Organic substance biosynthetic process	14	2734	0.46	0.0202	EEF1A2,AIMP2,AARS,SMARCB1,TP53,STAR,NARS2,HNF4A,WRAP53,DNA2,PAX2,SLC2A1,COASY,GTF2H5
GO Process	GO:0010468	Regulation of gene expression	19	4813	0.34	0.0225	EEF1A2,NUP107,AARS,SMARCB1,TP53,ERBB2,STAR,XPC,HNF4A,NKX2-1,TRRAP,POU3F3,ACTA1,PAX2,INS,ZEB2,WWOX,GTF2H5,HNF1B
GO Process	GO:2000378	Negative regulation of reactive oxygen species metabolic process	3	57	1.47	0.0230	TP53,PAX2,INS
GO Process	GO:0050794	Regulation of cellular process	30	10932	0.19	0.0231	EEF1A2,AIMP2,NUP107,AARS,ARFGEF1,SMARCB1,AKT3,TP53,ERBB2,STAR,XPC,BUB1B,YWHAG,HNF4A,FGF13,WRAP53,RAB11B,TUBB,NKX2-1,DNA2,TRRAP,POU3F3,PAX2,INS,KLLN,SLC2A1,ZEB2,WWOX,GTF2H5,HNF1B
GO Process	GO:0048863	Stem cell differentiation	4	156	1.16	0.0234	TP53,PAX2,ZEB2,HNF1B
GO Process	GO:0071495	Cellular response to endogenous stimulus	9	1181	0.63	0.0234	TP53,ERBB2,STAR,YWHAG,HNF4A,ACTA1,PAX2,INS,WWOX
GO Process	GO:0032880	Regulation of protein localization	8	934	0.68	0.0252	TP53,ERBB2,YWHAG,HNF4A,WRAP53,RAB11B,INS,SLC2A1
GO Process	GO:0046483	Heterocycle metabolic process	14	2840	0.44	0.0255	AIMP2,AARS,SMARCB1,TP53,STAR,NARS2,XPC,HNF4A,WRAP53,DNA2,TRRAP,PAX2,COASY,GTF2H5
GO Process	GO:0065008	Regulation of biological quality	17	4042	0.37	0.0259	AARS,ARFGEF1,SMARCB1,TP53,STAR,YWHAG,HNF4A,FGF13,WRAP53,RAB11B,TUBB,DNA2,POU3F3,PAX2,INS,SLC2A1,HNF1B
GO Process	GO:0065009	Regulation of molecular function	19	4913	0.33	0.0259	EEF1A2,AIMP2,ARFGEF1,SMARCB1,TP53,ERBB2,XPC,YWHAG,HNF4A,FGF13,WRAP53,NKX2-1,TRRAP,POU3F3,PAX2,INS,ZEB2,WWOX,HNF1B
GO Process	GO:0043471	Regulation of cellular carbohydrate catabolic process	2	11	2023-01-02	0.0277	TP53,INS
GO Process	GO:0071214	Cellular response to abiotic stimulus	5	313	0.95	0.0277	TP53,XPC,RAB11B,SLC2A1,GTF2H5
GO Process	GO:0006725	Cellular aromatic compound metabolic process	14	2882	0.43	0.0280	AIMP2,AARS,SMARCB1,TP53,STAR,NARS2,XPC,HNF4A,WRAP53,DNA2,TRRAP,PAX2,COASY,GTF2H5
GO Process	GO:0090304	Nucleic acid metabolic process	12	2178	0.49	0.0293	AIMP2,AARS,SMARCB1,TP53,NARS2,XPC,HNF4A,WRAP53,DNA2,TRRAP,PAX2,GTF2H5
GO Process	GO:0030154	Cell differentiation	16	3702	0.38	0.0307	AIMP2,ARFGEF1,TP53,ERBB2,STAR,YWHAG,HNF4A,FGF13,FSCN2,NKX2-1,POU3F3,ACTA1,PAX2,ZEB2,WWOX,HNF1B
GO Process	GO:0042981	Regulation of apoptotic process	10	1550	0.56	0.0307	EEF1A2,AARS,TP53,STAR,YWHAG,POU3F3,PAX2,INS,WWOX,HNF1B
GO Process	GO:0045944	Positive regulation of transcription by rna polymerase ii	9	1253	0.6	0.0307	SMARCB1,TP53,HNF4A,NKX2-1,POU3F3,PAX2,ZEB2,WWOX,HNF1B
GO Process	GO:0048699	Generation of neurons	10	1551	0.56	0.0307	ARFGEF1,TP53,ERBB2,STAR,YWHAG,FGF13,FSCN2,NKX2-1,PAX2,ZEB2
GO Process	GO:0003002	Regionalization	5	332	0.93	0.0324	TP53,NKX2-1,PAX2,ZEB2,HNF1B
GO Process	GO:0071333	Cellular response to glucose stimulus	3	71	1.37	0.0324	STAR,RAB11B,PAX2
GO Process	GO:0010817	Regulation of hormone levels	6	524	0.81	0.0325	STAR,HNF4A,RAB11B,INS,SLC2A1,HNF1B
GO Process	GO:0070365	Hepatocyte differentiation	2	13	1.93	0.0325	HNF4A,HNF1B
GO Process	GO:0061351	Neural precursor cell proliferation	3	74	1.36	0.0337	FGF13,POU3F3,ZEB2
GO Process	GO:1903829	Positive regulation of cellular protein localization	5	342	0.91	0.0337	TP53,ERBB2,YWHAG,WRAP53,INS
GO Process	GO:0071236	Cellular response to antibiotic	2	14	2023-09-01	0.0346	TP53,STAR
GO Process	GO:0006355	Regulation of transcription, dna-templated	15	3388	0.39	0.0349	NUP107,SMARCB1,TP53,ERBB2,XPC,HNF4A,NKX2-1,TRRAP,POU3F3,PAX2,INS,ZEB2,WWOX,GTF2H5,HNF1B
GO Process	GO:0072080	Nephron tubule development	3	78	1.33	0.0377	POU3F3,PAX2,HNF1B
GO Process	GO:0051338	Regulation of transferase activity	8	1036	0.64	0.0378	EEF1A2,TP53,ERBB2,YWHAG,FGF13,WRAP53,INS,ZEB2
GO Process	GO:0006139	Nucleobase-containing compound metabolic process	13	2659	0.44	0.0390	AIMP2,AARS,SMARCB1,TP53,NARS2,XPC,HNF4A,WRAP53,DNA2,TRRAP,PAX2,COASY,GTF2H5
GO Process	GO:0000075	Cell cycle checkpoint	4	198	2023-05-01	0.0404	TP53,XPC,BUB1B,DNA2
GO Process	GO:0021766	Hippocampus development	3	81	1.32	0.0404	FGF13,NKX2-1,ZEB2
GO Process	GO:1905475	Regulation of protein localization to membrane	4	198	2023-05-01	0.0404	TP53,ERBB2,YWHAG,INS
GO Process	GO:1903827	Regulation of cellular protein localization	6	568	0.77	0.0406	TP53,ERBB2,YWHAG,WRAP53,RAB11B,INS
GO Process	GO:1904951	Positive regulation of establishment of protein localization	5	368	0.88	0.0409	TP53,ERBB2,YWHAG,WRAP53,INS
GO Process	GO:0072079	Nephron tubule formation	2	17	1.82	0.0428	PAX2,HNF1B
GO Process	GO:1901360	Organic cyclic compound metabolic process	14	3118	0.4	0.0455	AIMP2,AARS,SMARCB1,TP53,STAR,NARS2,XPC,HNF4A,WRAP53,DNA2,TRRAP,PAX2,COASY,GTF2H5
GO Process	GO:0072202	Cell differentiation involved in metanephros development	2	18	1.79	0.0463	POU3F3,PAX2
GO Process	GO:0065004	protein-DNA complex assembly	4	213	2023-02-01	0.0464	SMARCB1,XPC,GTF2H5,HNF1B
GO Process	GO:0043470	Regulation of carbohydrate catabolic process	3	90	1.27	0.0478	NUP107,TP53,INS
GO Process	GO:0051128	Regulation of cellular component organization	12	2402	0.45	0.0497	ARFGEF1,SMARCB1,TP53,ERBB2,BUB1B,YWHAG,HNF4A,FGF13,TUBB,INS,ZEB2,GTF2H5
GO Process	GO:0060429	Epithelium development	8	1109	0.61	0.0497	AIMP2,TP53,HNF4A,NKX2-1,POU3F3,PAX2,ZEB2,HNF1B
GO Process	GO:0019219	Regulation of nucleobase-containing compound metabolic process	16	3982	0.35	0.0499	NUP107,SMARCB1,TP53,ERBB2,XPC,HNF4A,WRAP53,NKX2-1,TRRAP,POU3F3,PAX2,INS,ZEB2,WWOX,GTF2H5,HNF1B
GO Molecular Function
GO Function	GO:0097159	Organic cyclic compound binding	24	5916	0.36	0.0110	EEF1A2,AARS,SMARCB1,AKT3,TP53,ERBB2,STAR,NARS2,XPC,BUB1B,YWHAG,HNF4A,WRAP53,RAB11B,TUBB,NKX2-1,DNA2,POU3F3,ACTA1,PAX2,KLLN,ZEB2,COASY,HNF1B
GO Function	GO:1901363	Heterocyclic compound binding	23	5831	0.34	0.0201	EEF1A2,AARS,SMARCB1,AKT3,TP53,ERBB2,NARS2,XPC,BUB1B,YWHAG,HNF4A,WRAP53,RAB11B,TUBB,NKX2-1,DNA2,POU3F3,ACTA1,PAX2,KLLN,ZEB2,COASY,HNF1B
GO Function	GO:0035639	Purine ribonucleoside triphosphate binding	12	1799	0.57	0.0445	EEF1A2,AARS,AKT3,TP53,ERBB2,NARS2,BUB1B,RAB11B,TUBB,DNA2,ACTA1,COASY
GO Function	GO:0032555	Purine ribonucleotide binding	12	1864	0.56	0.0452	EEF1A2,AARS,AKT3,TP53,ERBB2,NARS2,BUB1B,RAB11B,TUBB,DNA2,ACTA1,COASY
GO Function	GO:0036094	Small molecule binding	14	2516	0.49	0.0452	EEF1A2,AARS,AKT3,TP53,ERBB2,STAR,NARS2,BUB1B,HNF4A,RAB11B,TUBB,DNA2,ACTA1,COASY
GO Function	GO:0140110	Transcription regulator activity	11	1657	0.57	0.0452	SMARCB1,TP53,XPC,HNF4A,NKX2-1,TRRAP,POU3F3,PAX2,ZEB2,WWOX,HNF1B
GO Cellular Component
GO Component	GO:0005694	Chromosome	15	1712	0.69	0.00014	NUP107,KANSL1,SMARCB1,TP53,XPC,BUB1B,HNF4A,WRAP53,NKX2-1,DNA2,TRRAP,POU3F3,PAX2,ZEB2,HNF1B
GO Component	GO:0043229	Intracellular organelle	35	12528	0.19	0.00014	EEF1A2,AIMP2,NUP107,AARS,ARFGEF1,KANSL1,SMARCB1,AKT3,TP53,ERBB2,STAR,NARS2,XPC,BUB1B,YWHAG,HNF4A,FGF13,WRAP53,RAB11B,FSCN2,TUBB,NKX2-1,DNA2,TRRAP,POU3F3,ACTA1,PAX2,INS,KLLN,SLC2A1,ZEB2,WWOX,COASY,GTF2H5,HNF1B
GO Component	GO:0043232	Intracellular non-membrane-bounded organelle	23	4880	0.42	0.00025	NUP107,ARFGEF1,KANSL1,SMARCB1,TP53,XPC,BUB1B,HNF4A,FGF13,WRAP53,FSCN2,TUBB,NKX2-1,DNA2,TRRAP,POU3F3,ACTA1,PAX2,KLLN,SLC2A1,ZEB2,GTF2H5,HNF1B
GO Component	GO:0070013	Intracellular organelle lumen	25	5857	0.38	0.00025	NUP107,ARFGEF1,KANSL1,SMARCB1,TP53,STAR,NARS2,XPC,BUB1B,HNF4A,FGF13,WRAP53,TUBB,NKX2-1,DNA2,TRRAP,POU3F3,PAX2,INS,KLLN,ZEB2,WWOX,COASY,GTF2H5,HNF1B
GO Component	GO:0043227	Membrane-bounded organelle	34	12427	0.18	0.00051	EEF1A2,AIMP2,NUP107,AARS,ARFGEF1,KANSL1,SMARCB1,AKT3,TP53,ERBB2,STAR,NARS2,XPC,BUB1B,YWHAG,HNF4A,FGF13,WRAP53,RAB11B,TUBB,NKX2-1,DNA2,TRRAP,POU3F3,ACTA1,PAX2,INS,KLLN,SLC2A1,ZEB2,WWOX,COASY,GTF2H5,HNF1B
GO Component	GO:0043231	Intracellular membrane-bounded organelle	32	10761	0.22	0.00057	EEF1A2,AIMP2,NUP107,AARS,ARFGEF1,KANSL1,SMARCB1,AKT3,TP53,ERBB2,STAR,NARS2,XPC,BUB1B,YWHAG,HNF4A,FGF13,WRAP53,TUBB,NKX2-1,DNA2,TRRAP,POU3F3,PAX2,INS,KLLN,SLC2A1,ZEB2,WWOX,COASY,GTF2H5,HNF1B
GO Component	GO:0000228	Nuclear chromosome	11	1256	0.69	0.0011	SMARCB1,TP53,BUB1B,HNF4A,NKX2-1,DNA2,TRRAP,POU3F3,PAX2,ZEB2,HNF1B
GO Component	GO:0031981	Nuclear lumen	21	4733	0.39	0.0011	NUP107,ARFGEF1,KANSL1,SMARCB1,TP53,NARS2,XPC,BUB1B,HNF4A,FGF13,WRAP53,NKX2-1,DNA2,TRRAP,POU3F3,PAX2,KLLN,ZEB2,WWOX,GTF2H5,HNF1B
GO Component	GO:0005634	Nucleus	26	7390	0.29	0.0017	AIMP2,NUP107,ARFGEF1,KANSL1,SMARCB1,AKT3,TP53,ERBB2,NARS2,XPC,BUB1B,HNF4A,FGF13,WRAP53,TUBB,NKX2-1,DNA2,TRRAP,POU3F3,PAX2,KLLN,SLC2A1,ZEB2,WWOX,GTF2H5,HNF1B
GO Component	GO:0005730	Nucleolus	9	924	0.74	0.0031	ARFGEF1,SMARCB1,TP53,XPC,FGF13,PAX2,KLLN,ZEB2,GTF2H5
GO Component	GO:0000790	Nuclear chromatin	9	1048	0.68	0.0078	SMARCB1,TP53,HNF4A,NKX2-1,TRRAP,POU3F3,PAX2,ZEB2,HNF1B
GO Component	GO:0005667	Transcription regulator complex	6	431	0.89	0.0111	TP53,NKX2-1,TRRAP,WWOX,GTF2H5,HNF1B
GO Component	GO:0005654	Nucleoplasm	17	3973	0.38	0.0165	ARFGEF1,KANSL1,SMARCB1,TP53,NARS2,XPC,HNF4A,WRAP53,NKX2-1,DNA2,TRRAP,POU3F3,KLLN,ZEB2,WWOX,GTF2H5,HNF1B
GO Component	GO:0098687	Chromosomal region	5	318	0.94	0.0216	NUP107,KANSL1,BUB1B,WRAP53,DNA2
GO Component	GO:0090734	Site of dna damage	3	82	1.31	0.0377	TP53,XPC,WRAP53
Reactome
Reactome	HSA-186712	Regulation of beta-cell development	4	42	1.73	0.0029	AKT3,HNF4A,INS,HNF1B
Reactome	HSA-210745	Regulation of gene expression in beta cells	3	21	2023-09-01	0.0112	AKT3,HNF4A,INS
Reactome	HSA-1640170	Cell Cycle	8	647	0.84	0.0114	NUP107,AKT3,TP53,BUB1B,YWHAG,WRAP53,TUBB,DNA2
Reactome	HSA-114452	Activation of BH3-only proteins	3	29	1.76	0.0136	AKT3,TP53,YWHAG
Reactome	HSA-212436	Generic Transcription Pathway	10	1197	0.67	0.0136	SMARCB1,AKT3,TP53,ERBB2,YWHAG,HNF4A,DNA2,INS,WWOX,GTF2H5
Reactome	HSA-69278	Cell Cycle, Mitotic	7	518	0.88	0.0136	NUP107,AKT3,TP53,BUB1B,YWHAG,TUBB,DNA2
Reactome	HSA-74160	Gene expression (Transcription)	11	1455	0.63	0.0136	NUP107,SMARCB1,AKT3,TP53,ERBB2,YWHAG,HNF4A,DNA2,INS,WWOX,GTF2H5
Reactome	HSA-379724	tRNA Aminoacylation	3	42	2023-06-01	0.0191	AIMP2,AARS,NARS2
Reactome	HSA-69620	Cell Cycle Checkpoints	5	269	2023-02-01	0.0257	NUP107,TP53,BUB1B,YWHAG,DNA2
Reactome	HSA-9614085	FOXO-mediated transcription	3	65	1.41	0.0437	AKT3,YWHAG,INS
Reactome	HSA-9614399	Regulation of localization of FOXO transcription factors	2	12	1.97	0.0465	AKT3,YWHAG
Reactome	HSA-1358803	Downregulation of ERBB2:ERBB3 signaling	2	13	1.93	0.0497	AKT3,ERBB2

## Sheet: Enrichment subnetwork2 seizure 
#category	term ID	term description	observed gene count	background gene count	strength	false discovery rate	matching proteins in your network (labels)
GO Biological Process
GO Process	GO:0098660	Inorganic ion transmembrane transport	12	714	1.31	1.25e-10	CLCN2,KCNH1,SLC1A2,GABRB3,SLC5A6,SCN8A,KCNQ2,GRIN1,GABRA1,GABRG2,SLC6A5,ATP1A1
GO Process	GO:0007268	Chemical synaptic transmission	9	418	1.42	2.63e-08	STX1B,SLC1A2,GABRB3,KCNQ2,GRIN1,GABRA1,GABRG2,SLC6A5,GRIA3
GO Process	GO:0042391	Regulation of membrane potential	9	440	2023-04-01	2.72e-08	STX1B,KCNH1,GABRB3,SCN8A,GRIN1,GABRA1,GABRG2,ATP1A1,GRIA3
GO Process	GO:0098662	Inorganic cation transmembrane transport	8	628	1.19	1.20e-05	KCNH1,SLC1A2,SLC5A6,SCN8A,KCNQ2,GRIN1,SLC6A5,ATP1A1
GO Process	GO:0006810	Transport	14	4353	0.59	3.98e-05	STX1B,CLCN2,KCNH1,SLC1A2,GABRB3,SLC5A6,SCN8A,KCNQ2,GRIN1,GABRA1,GABRG2,SLC6A5,ATP1A1,GRIA3
GO Process	GO:0071420	Cellular response to histamine	3	8	2.66	4.73e-05	GABRB3,GABRA1,GABRG2
GO Process	GO:0051179	Localization	15	5591	0.52	5.01e-05	STX1B,CLCN2,KCNH1,SLC1A2,GABRB3,SLC5A6,SCN8A,KCNQ2,CNTNAP2,GRIN1,GABRA1,GABRG2,SLC6A5,ATP1A1,GRIA3
GO Process	GO:0034762	Regulation of transmembrane transport	7	560	1.18	8.03e-05	CLCN2,KCNH1,SLC1A2,SCN8A,KCNQ2,GRIN1,GRIA3
GO Process	GO:1904862	Inhibitory synapse assembly	3	12	2.49	0.00010	GABRB3,GABRA1,GABRG2
GO Process	GO:0043269	Regulation of ion transport	7	696	2023-09-01	0.00028	CLCN2,KCNH1,SCN8A,KCNQ2,GRIN1,ATP1A1,GRIA3
GO Process	GO:0034765	Regulation of ion transmembrane transport	6	477	1.19	0.00061	CLCN2,KCNH1,SCN8A,KCNQ2,GRIN1,GRIA3
GO Process	GO:0007214	Gamma-aminobutyric acid signaling pathway	3	27	2.13	0.00072	GABRB3,GABRA1,GABRG2
GO Process	GO:0098739	Import across plasma membrane	4	119	1.61	0.00096	SLC1A2,SLC5A6,SLC6A5,ATP1A1
GO Process	GO:0051049	Regulation of transport	9	1776	0.79	0.00099	STX1B,CLCN2,KCNH1,SLC1A2,SCN8A,KCNQ2,GRIN1,ATP1A1,GRIA3
GO Process	GO:0030534	Adult behavior	4	136	1.56	0.0014	SLC1A2,CNTNAP2,GRIN1,GABRG2
GO Process	GO:0050877	Nervous system process	8	1352	0.86	0.0014	KCNH1,GABRB3,SCN8A,CNTNAP2,GRIN1,GABRA1,GABRG2,GRIA3
GO Process	GO:0003008	System process	9	1942	0.75	0.0019	KCNH1,GABRB3,SCN8A,CNTNAP2,GRIN1,GABRA1,GABRG2,ATP1A1,GRIA3
GO Process	GO:0023052	Signaling	13	5239	0.48	0.0028	STX1B,KCNH1,SLC1A2,GABRB3,SCN8A,KCNQ2,CNTNAP2,GRIN1,GABRA1,GABRG2,SLC6A5,ATP1A1,GRIA3
GO Process	GO:0098657	Import into cell	4	164	1.47	0.0028	SLC1A2,SLC5A6,SLC6A5,ATP1A1
GO Process	GO:0007154	Cell communication	13	5320	0.48	0.0031	STX1B,KCNH1,SLC1A2,GABRB3,SCN8A,KCNQ2,CNTNAP2,GRIN1,GABRA1,GABRG2,SLC6A5,ATP1A1,GRIA3
GO Process	GO:0007399	Nervous system development	9	2371	0.67	0.0083	STX1B,SLC1A2,GABRB3,SCN8A,KCNQ2,CNTNAP2,GRIN1,GABRA1,GABRG2
GO Process	GO:0065008	Regulation of biological quality	11	4042	0.52	0.0127	STX1B,CLCN2,KCNH1,SLC1A2,GABRB3,SCN8A,GRIN1,GABRA1,GABRG2,ATP1A1,GRIA3
GO Process	GO:0090030	Regulation of steroid hormone biosynthetic process	2	11	2.35	0.0133	CLCN2,ATP1A1
GO Process	GO:0051932	Synaptic transmission, gabaergic	2	14	2.24	0.0196	GABRA1,GABRG2
GO Process	GO:0089718	Amino acid import across plasma membrane	2	17	2.16	0.0267	SLC1A2,SLC6A5
GO Process	GO:0035637	Multicellular organismal signaling	3	137	1.43	0.0445	SCN8A,CNTNAP2,ATP1A1
GO Molecular Function
GO Function	GO:0015318	Inorganic molecular entity transmembrane transporter activity	13	813	1.29	1.97e-12	CLCN2,KCNH1,SLC1A2,GABRB3,SLC5A6,SCN8A,KCNQ2,GRIN1,GABRA1,GABRG2,SLC6A5,ATP1A1,GRIA3
GO Function	GO:0015075	Ion transmembrane transporter activity	13	865	1.26	2.17e-12	CLCN2,KCNH1,SLC1A2,GABRB3,SLC5A6,SCN8A,KCNQ2,GRIN1,GABRA1,GABRG2,SLC6A5,ATP1A1,GRIA3
GO Function	GO:0022836	Gated channel activity	9	332	1.52	8.82e-10	CLCN2,KCNH1,GABRB3,SCN8A,KCNQ2,GRIN1,GABRA1,GABRG2,GRIA3
GO Function	GO:0005216	Ion channel activity	9	425	1.41	6.39e-09	CLCN2,KCNH1,GABRB3,SCN8A,KCNQ2,GRIN1,GABRA1,GABRG2,GRIA3
GO Function	GO:0022890	Inorganic cation transmembrane transporter activity	9	584	1.28	6.87e-08	KCNH1,SLC1A2,SLC5A6,SCN8A,KCNQ2,GRIN1,SLC6A5,ATP1A1,GRIA3
GO Function	GO:0046873	Metal ion transmembrane transporter activity	8	427	1.36	1.80e-07	KCNH1,SLC1A2,SLC5A6,SCN8A,KCNQ2,GRIN1,SLC6A5,ATP1A1
GO Function	GO:1904315	Transmitter-gated ion channel activity involved in regulation of postsynaptic membrane potential	5	53	2023-06-02	2.20e-07	GABRB3,GRIN1,GABRA1,GABRG2,GRIA3
GO Function	GO:0008509	Anion transmembrane transporter activity	7	349	1.39	1.11e-06	CLCN2,SLC1A2,GABRB3,SLC5A6,GABRA1,GABRG2,SLC6A5
GO Function	GO:0015077	Monovalent inorganic cation transmembrane transporter activity	7	381	1.35	1.90e-06	KCNH1,SLC1A2,SLC5A6,SCN8A,KCNQ2,SLC6A5,ATP1A1
GO Function	GO:0015081	Sodium ion transmembrane transporter activity	5	150	1.61	1.67e-05	SLC1A2,SLC5A6,SCN8A,SLC6A5,ATP1A1
GO Function	GO:0022851	GABA-gated chloride ion channel activity	3	13	2.45	3.36e-05	GABRB3,GABRA1,GABRG2
GO Function	GO:0005244	Voltage-gated ion channel activity	5	194	2023-05-01	5.29e-05	CLCN2,KCNH1,SCN8A,KCNQ2,GRIN1
GO Function	GO:0005254	Chloride channel activity	4	74	1.82	5.29e-05	CLCN2,GABRB3,GABRA1,GABRG2
GO Function	GO:0004890	GABA-A receptor activity	3	19	2.29	7.89e-05	GABRB3,GABRA1,GABRG2
GO Function	GO:0005261	Cation channel activity	5	326	1.27	0.00049	KCNH1,SCN8A,KCNQ2,GRIN1,GRIA3
GO Function	GO:0015370	Solute:sodium symporter activity	3	71	1.71	0.0026	SLC1A2,SLC5A6,SLC6A5
GO Function	GO:0022853	Active ion transmembrane transporter activity	4	237	1.31	0.0033	SLC1A2,SLC5A6,SLC6A5,ATP1A1
GO Function	GO:0005237	Inhibitory extracellular ligand-gated ion channel activity	2	15	2.21	0.0072	GABRA1,GABRG2
GO Function	GO:0005283	Amino acid:sodium symporter activity	2	16	2.18	0.0079	SLC1A2,SLC6A5
GO Function	GO:0004970	Ionotropic glutamate receptor activity	2	19	2023-11-02	0.0105	GRIN1,GRIA3
GO Function	GO:0030506	Ankyrin binding	2	20	2023-09-02	0.0113	KCNQ2,ATP1A1
GO Function	GO:0022843	Voltage-gated cation channel activity	3	137	1.43	0.0138	KCNH1,KCNQ2,GRIN1
GO Function	GO:0046943	Carboxylic acid transmembrane transporter activity	3	154	1.38	0.0181	SLC1A2,SLC5A6,SLC6A5
GO Function	GO:0015079	Potassium ion transmembrane transporter activity	3	159	1.36	0.0190	KCNH1,KCNQ2,ATP1A1
GO Function	GO:0005251	Delayed rectifier potassium channel activity	2	30	1.91	0.0198	KCNH1,KCNQ2
GO Function	GO:0005516	Calmodulin binding	3	201	1.26	0.0351	KCNH1,KCNQ2,GRIN1
GO Cellular Component
GO Component	GO:1902495	Transmembrane transporter complex	11	313	1.63	1.48e-13	CLCN2,KCNH1,GABRB3,SCN8A,KCNQ2,CNTNAP2,GRIN1,GABRA1,GABRG2,ATP1A1,GRIA3
GO Component	GO:0034702	Ion channel complex	10	289	1.63	2.48e-12	CLCN2,KCNH1,GABRB3,SCN8A,KCNQ2,CNTNAP2,GRIN1,GABRA1,GABRG2,GRIA3
GO Component	GO:0098796	Membrane protein complex	13	1141	1.14	1.95e-11	STX1B,CLCN2,KCNH1,SLC1A2,GABRB3,SCN8A,KCNQ2,CNTNAP2,GRIN1,GABRA1,GABRG2,ATP1A1,GRIA3
GO Component	GO:0005887	Integral component of plasma membrane	14	1623	2023-02-01	2.68e-11	CLCN2,KCNH1,SLC1A2,GABRB3,SLC5A6,SCN8A,KCNQ2,CNTNAP2,GRIN1,GABRA1,GABRG2,SLC6A5,ATP1A1,GRIA3
GO Component	GO:0098590	Plasma membrane region	13	1219	2023-12-01	3.02e-11	STX1B,KCNH1,SLC1A2,GABRB3,SLC5A6,CNTNAP2,GRIN1,GABRA1,GABRG2,SLC6A5,MPDZ,ATP1A1,GRIA3
GO Component	GO:0030054	Cell junction	14	2075	0.92	4.92e-10	STX1B,KCNH1,SLC1A2,GABRB3,SCN8A,KCNQ2,CNTNAP2,GRIN1,GABRA1,GABRG2,SLC6A5,MPDZ,ATP1A1,GRIA3
GO Component	GO:0097060	Synaptic membrane	9	387	1.45	9.34e-10	STX1B,KCNH1,SLC1A2,GABRB3,GRIN1,GABRA1,GABRG2,SLC6A5,GRIA3
GO Component	GO:0120025	Plasma membrane bounded cell projection	14	2193	0.89	9.34e-10	STX1B,KCNH1,SLC1A2,GABRB3,SLC5A6,SCN8A,KCNQ2,CNTNAP2,GRIN1,GABRA1,GABRG2,MPDZ,ATP1A1,GRIA3
GO Component	GO:0045202	Synapse	12	1351	2023-04-01	2.45e-09	STX1B,KCNH1,SLC1A2,GABRB3,KCNQ2,GRIN1,GABRA1,GABRG2,SLC6A5,MPDZ,ATP1A1,GRIA3
GO Component	GO:0043005	Neuron projection	12	1366	2023-03-01	2.57e-09	STX1B,KCNH1,SLC1A2,GABRB3,SCN8A,KCNQ2,CNTNAP2,GRIN1,GABRA1,GABRG2,MPDZ,GRIA3
GO Component	GO:0005886	Plasma membrane	16	5314	0.57	1.08e-07	STX1B,CLCN2,KCNH1,SLC1A2,GABRB3,SLC5A6,SCN8A,KCNQ2,CNTNAP2,GRIN1,GABRA1,GABRG2,SLC6A5,MPDZ,ATP1A1,GRIA3
GO Component	GO:0032589	Neuron projection membrane	5	63	1.99	1.96e-07	KCNH1,SLC1A2,CNTNAP2,GABRA1,GABRG2
GO Component	GO:0044304	Main axon	5	70	1.94	3.04e-07	KCNH1,SLC1A2,SCN8A,KCNQ2,CNTNAP2
GO Component	GO:0034703	Cation channel complex	6	214	1.54	1.29e-06	KCNH1,SCN8A,KCNQ2,CNTNAP2,GRIN1,GRIA3
GO Component	GO:0030424	Axon	8	646	1.18	1.30e-06	STX1B,KCNH1,SLC1A2,SCN8A,KCNQ2,CNTNAP2,GRIN1,GABRG2
GO Component	GO:0098794	Postsynapse	8	643	1.18	1.30e-06	KCNH1,GABRB3,GRIN1,GABRA1,GABRG2,MPDZ,ATP1A1,GRIA3
GO Component	GO:0016021	Integral component of membrane	15	5181	0.55	2.18e-06	STX1B,CLCN2,KCNH1,SLC1A2,GABRB3,SLC5A6,SCN8A,KCNQ2,CNTNAP2,GRIN1,GABRA1,GABRG2,SLC6A5,ATP1A1,GRIA3
GO Component	GO:0045211	Postsynaptic membrane	6	281	1.42	4.92e-06	KCNH1,GABRB3,GRIN1,GABRA1,GABRG2,GRIA3
GO Component	GO:0034707	Chloride channel complex	4	49	2.0	6.01e-06	CLCN2,GABRB3,GABRA1,GABRG2
GO Component	GO:0098797	Plasma membrane protein complex	7	547	1.19	8.70e-06	KCNH1,SCN8A,KCNQ2,CNTNAP2,GRIN1,ATP1A1,GRIA3
GO Component	GO:0099699	Integral component of synaptic membrane	5	157	1.59	9.66e-06	KCNH1,SLC1A2,GRIN1,GABRA1,SLC6A5
GO Component	GO:0031253	Cell projection membrane	6	338	1.34	1.22e-05	KCNH1,SLC1A2,SLC5A6,CNTNAP2,GABRA1,GABRG2
GO Component	GO:1902711	GABA-A receptor complex	3	13	2.45	1.42e-05	GABRB3,GABRA1,GABRG2
GO Component	GO:0099572	Postsynaptic specialization	6	369	2023-03-01	1.71e-05	KCNH1,GRIN1,GABRA1,MPDZ,ATP1A1,GRIA3
GO Component	GO:0030673	Axolemma	3	16	2.36	2.22e-05	KCNH1,SLC1A2,CNTNAP2
GO Component	GO:0031410	Cytoplasmic vesicle	10	2386	0.71	0.00015	KCNH1,GABRB3,SCN8A,CNTNAP2,GRIN1,GABRA1,GABRG2,MPDZ,ATP1A1,GRIA3
GO Component	GO:0099634	Postsynaptic specialization membrane	4	126	1.59	0.00015	KCNH1,GRIN1,GABRA1,GRIA3
GO Component	GO:0014069	Postsynaptic density	5	344	1.25	0.00028	KCNH1,GRIN1,MPDZ,ATP1A1,GRIA3
GO Component	GO:0042734	Presynaptic membrane	4	158	1.49	0.00032	STX1B,KCNH1,SLC1A2,SLC6A5
GO Component	GO:0043235	Receptor complex	5	381	1.21	0.00042	GABRB3,GRIN1,GABRA1,GABRG2,GRIA3
GO Component	GO:0031982	Vesicle	11	3879	0.54	0.0011	KCNH1,GABRB3,SLC5A6,SCN8A,CNTNAP2,GRIN1,GABRA1,GABRG2,MPDZ,ATP1A1,GRIA3
GO Component	GO:0098982	GABA-ergic synapse	3	74	2023-07-01	0.0012	GABRB3,GABRA1,GABRG2
GO Component	GO:0099056	Integral component of presynaptic membrane	3	77	1.68	0.0013	KCNH1,SLC1A2,SLC6A5
GO Component	GO:0008076	Voltage-gated potassium channel complex	3	82	1.65	0.0015	KCNH1,KCNQ2,CNTNAP2
GO Component	GO:0098793	Presynapse	5	526	2023-07-01	0.0017	STX1B,KCNH1,SLC1A2,GRIN1,SLC6A5
GO Component	GO:0098839	Postsynaptic density membrane	3	100	1.56	0.0025	KCNH1,GRIN1,GRIA3
GO Component	GO:0033268	Node of ranvier	2	15	2.21	0.0027	SCN8A,KCNQ2
GO Component	GO:0030425	Dendrite	5	612	1.0	0.0031	KCNH1,CNTNAP2,GRIN1,MPDZ,GRIA3
GO Component	GO:0043194	Axon initial segment	2	18	2.13	0.0036	SCN8A,KCNQ2
GO Component	GO:0012506	Vesicle membrane	5	793	0.89	0.0099	GABRB3,SLC5A6,GABRA1,GABRG2,GRIA3
GO Component	GO:0008328	Ionotropic glutamate receptor complex	2	43	1.75	0.0175	GRIN1,GRIA3
GO Component	GO:0032590	Dendrite membrane	2	44	1.74	0.0180	GABRA1,GABRG2
GO Component	GO:0060076	Excitatory synapse	2	51	1.68	0.0231	GRIN1,GRIA3
GO Component	GO:0099060	Integral component of postsynaptic specialization membrane	2	75	1.51	0.0477	GRIN1,GABRA1
Reactome
Reactome	HSA-112316	Neuronal System	8	406	1.38	9.00e-07	KCNH1,SLC1A2,GABRB3,KCNQ2,GRIN1,GABRA1,GABRG2,GRIA3
Reactome	HSA-112315	Transmission across Chemical Synapses	6	267	1.44	5.38e-05	SLC1A2,GABRB3,GRIN1,GABRA1,GABRG2,GRIA3
Reactome	HSA-112314	Neurotransmitter receptors and postsynaptic signal transmission	5	203	1.48	0.00037	GABRB3,GRIN1,GABRA1,GABRG2,GRIA3
Reactome	HSA-1236394	Signaling by ERBB4	3	58	2023-08-01	0.0085	GABRB3,GABRA1,GABRG2
Reactome	HSA-977443	GABA receptor activation	3	60	1.79	0.0085	GABRB3,GABRA1,GABRG2

## Sheet: Enrichment subnetwork3 seizure 
#category	term ID	term description	observed gene count	background gene count	strength	false discovery rate	matching proteins in your network (labels)
GO Molecular Function
GO Function	GO:0005201	Extracellular matrix structural constituent	4	119	1.91	0.00033	HSPG2,COL11A2,COLQ,COL13A1
GO Function	GO:0008375	Acetylglucosaminyltransferase activity	3	51	2.16	0.0018	EXTL3,POMGNT1,B3GALT6
GO Function	GO:0140103	Catalytic activity, acting on a glycoprotein	2	22	2.35	0.0325	POMGNT1,B3GALT6
GO Cellular Component
GO Component	GO:0005581	Collagen trimer	3	88	1.92	0.0091	COL11A2,COLQ,COL13A1
GO Component	GO:0062023	Collagen-containing extracellular matrix	4	396	1.39	0.0096	HSPG2,COL11A2,COLQ,COL13A1
Reactome
Reactome	HSA-1474228	Degradation of the extracellular matrix	3	140	1.72	0.0452	HSPG2,COL11A2,COL13A1
Reactome	HSA-1971475	A tetrasaccharide linker sequence is required for GAG synthesis	2	26	2.27	0.0452	HSPG2,B3GALT6
Reactome	HSA-3781865	Diseases of glycosylation	3	141	1.72	0.0452	POMGNT1,HSPG2,B3GALT6
Reactome	HSA-4420332	Defective B3GALT6 causes EDSP2 and SEMDJL1	2	20	2.39	0.0452	HSPG2,B3GALT6
Reactome	HSA-8948216	Collagen chain trimerization	2	44	2023-05-02	0.0465	COL11A2,COL13A1
Monarch HPO	HP:0003701	Proximal muscle weakness	3	172	1.63	0.0025	POMGNT1,COLQ,COL13A1
Monarch HPO	HP:0010508	Metatarsus valgus	2	21	2.37	0.0025	POMGNT1,HSPG2
Monarch HPO	HP:0001627	Abnormal heart morphology	5	1204	2023-01-01	0.0027	EXTL3,POMGNT1,HSPG2,B3GALT6,COLQ
Monarch HPO	HP:0002460	Distal muscle weakness	3	177	1.62	0.0027	EXTL3,COLQ,COL13A1
Monarch HPO	HP:0009122	Aplasia/hypoplasia affecting bones of the axial skeleton	3	177	1.62	0.0027	EXTL3,HSPG2,COL11A2
Monarch HPO	HP:0100569	Abnormally ossified vertebrae	2	22	2.35	0.0027	HSPG2,COL11A2
Monarch HPO	HP:0001507	Growth abnormality	6	2181	0.83	0.0028	EXTL3,POMGNT1,GJB3,HSPG2,COL11A2,B3GALT6
Monarch HPO	HP:0002098	Respiratory distress	3	183	2023-06-01	0.0028	B3GALT6,COLQ,COL13A1
Monarch HPO	HP:0002176	Spinal cord compression	2	23	2.33	0.0028	EXTL3,B3GALT6
Monarch HPO	HP:0002979	Bowing of the legs	3	181	1.61	0.0028	HSPG2,COL11A2,B3GALT6
Monarch HPO	HP:0004568	Beaking of vertebral bodies	2	23	2.33	0.0028	COL11A2,B3GALT6
Monarch HPO	HP:0000463	Anteverted nares	4	571	1.23	0.0029	EXTL3,POMGNT1,COL11A2,B3GALT6
Monarch HPO	HP:0000518	Cataract	4	573	1.23	0.0029	POMGNT1,GJB3,HSPG2,B3GALT6
Monarch HPO	HP:0003403	EMG: decremental response of compound muscle action potential to repetitive nerve stimulation	2	24	2.31	0.0029	COLQ,COL13A1
Monarch HPO	HP:0001780	Abnormality of toe	4	588	1.22	0.0031	EXTL3,HSPG2,COL11A2,B3GALT6
Monarch HPO	HP:0006257	Abnormality of carpal bone ossification	2	26	2.27	0.0032	EXTL3,B3GALT6
Monarch HPO	HP:0000160	Narrow mouth	3	198	1.57	0.0034	EXTL3,HSPG2,COL11A2
Monarch HPO	HP:0005943	Respiratory arrest	2	27	2.26	0.0034	B3GALT6,COL13A1
Monarch HPO	HP:0012379	Abnormal enzyme/coenzyme activity	3	198	1.57	0.0034	POMGNT1,HSPG2,COLQ
Monarch HPO	HP:0009127	Abnormality of the musculature of the limbs	3	202	1.56	0.0035	POMGNT1,COLQ,COL13A1
Monarch HPO	HP:0000175	Cleft palate	4	618	2023-02-01	0.0036	POMGNT1,HSPG2,COL11A2,B3GALT6
Monarch HPO	HP:0002793	Abnormal pattern of respiration	4	624	2023-02-01	0.0038	HSPG2,B3GALT6,COLQ,COL13A1
Monarch HPO	HP:0000218	High palate	4	634	1.19	0.0039	HSPG2,B3GALT6,COLQ,COL13A1
Monarch HPO	HP:0011338	Abnormality of mouth shape	3	210	1.54	0.0039	EXTL3,HSPG2,COLQ
Monarch HPO	HP:0000163	Abnormal oral cavity morphology	4	644	1.18	0.0040	EXTL3,POMGNT1,HSPG2,COL11A2
Monarch HPO	HP:0001083	Ectopia lentis	2	30	2.21	0.0040	HSPG2,B3GALT6
Monarch HPO	HP:0002827	Hip dislocation	3	215	1.53	0.0040	HSPG2,B3GALT6,COL13A1
Monarch HPO	HP:0003198	Myopathy	3	216	1.53	0.0040	POMGNT1,HSPG2,COLQ
Monarch HPO	HP:0004303	Abnormal muscle fiber morphology	3	214	1.54	0.0040	POMGNT1,COLQ,COL13A1
Monarch HPO	HP:0000316	Hypertelorism	4	649	1.18	0.0041	EXTL3,HSPG2,COL11A2,B3GALT6
Monarch HPO	HP:0000410	Mixed hearing impairment	2	32	2.18	0.0043	COL11A2,B3GALT6
Monarch HPO	HP:0004302	Functional motor deficit	3	227	1.51	0.0044	POMGNT1,COLQ,COL13A1
Monarch HPO	HP:0000481	Abnormal cornea morphology	4	675	1.16	0.0045	POMGNT1,GJB3,HSPG2,B3GALT6
Monarch HPO	HP:0001270	Motor delay	4	674	1.16	0.0045	EXTL3,POMGNT1,B3GALT6,COL13A1
Monarch HPO	HP:0000772	Abnormal rib morphology	3	235	1.49	0.0048	HSPG2,COL11A2,B3GALT6
Monarch HPO	HP:0000597	Ophthalmoparesis	3	242	1.48	0.0051	POMGNT1,COLQ,COL13A1
Monarch HPO	HP:0011800	Midface retrusion	3	243	1.48	0.0051	POMGNT1,COL11A2,B3GALT6
Monarch HPO	HP:0000366	Abnormality of the nose	5	1469	0.92	0.0054	EXTL3,POMGNT1,HSPG2,COL11A2,B3GALT6
Monarch HPO	HP:0001284	Areflexia	3	249	1.47	0.0055	POMGNT1,COLQ,COL13A1
Monarch HPO	HP:0003196	Short nose	3	249	1.47	0.0055	EXTL3,COL11A2,B3GALT6
Monarch HPO	HP:0003690	Limb muscle weakness	3	251	1.47	0.0055	EXTL3,COLQ,COL13A1
Monarch HPO	HP:0005257	Thoracic hypoplasia	2	38	2023-11-02	0.0055	HSPG2,COL11A2
Monarch HPO	HP:0030237	Hand muscle weakness	2	38	2023-11-02	0.0055	COLQ,COL13A1
Monarch HPO	HP:0011329	Abnormality of cranial sutures	3	254	1.46	0.0056	EXTL3,HSPG2,B3GALT6
Monarch HPO	HP:0003083	Dislocated radial head	2	41	2023-08-02	0.0061	EXTL3,B3GALT6
Monarch HPO	HP:0001612	Weak cry	2	42	2023-07-02	0.0064	COLQ,COL13A1
Monarch HPO	HP:0003015	Flared metaphysis	2	44	2023-05-02	0.0069	COL11A2,B3GALT6
Monarch HPO	HP:0003803	Type 1 muscle fiber predominance	2	45	2023-04-02	0.0072	COLQ,COL13A1
Monarch HPO	HP:0002104	Apnea	3	285	1.41	0.0076	HSPG2,COLQ,COL13A1
Monarch HPO	HP:0001762	Talipes equinovarus	3	287	1.41	0.0077	HSPG2,B3GALT6,COLQ
Monarch HPO	HP:0000940	Abnormal diaphysis morphology	2	50	1.99	0.0085	COL11A2,B3GALT6
Monarch HPO	HP:0002648	Abnormality of calvarial morphology	3	299	1.39	0.0085	EXTL3,HSPG2,B3GALT6
Monarch HPO	HP:0000501	Glaucoma	3	303	1.38	0.0087	POMGNT1,GJB3,B3GALT6
Monarch HPO	HP:0002650	Scoliosis	4	832	2023-07-01	0.0088	HSPG2,B3GALT6,COLQ,COL13A1
Monarch HPO	HP:0001019	Erythroderma	2	52	1.97	0.0090	EXTL3,GJB3
Monarch HPO	HP:0003306	Spinal rigidity	2	53	1.97	0.0093	HSPG2,COL13A1
Monarch HPO	HP:0001156	Brachydactyly	3	313	1.37	0.0094	EXTL3,GJB3,COL11A2
Monarch HPO	HP:0012252	Abnormal respiratory system morphology	3	314	1.37	0.0095	EXTL3,HSPG2,B3GALT6
Monarch HPO	HP:0000470	Short neck	3	325	1.35	0.0104	HSPG2,COL11A2,B3GALT6
Monarch HPO	HP:0100295	Muscle fiber atrophy	2	58	1.93	0.0108	COLQ,COL13A1
Monarch HPO	HP:0009053	Distal lower limb muscle weakness	2	59	1.92	0.0111	EXTL3,COL13A1
Monarch HPO	HP:0000486	Strabismus	4	901	2023-04-01	0.0114	POMGNT1,HSPG2,COL11A2,COL13A1
Monarch HPO	HP:0000405	Conductive hearing impairment	3	339	1.34	0.0115	POMGNT1,COL11A2,B3GALT6
Monarch HPO	HP:0000238	Hydrocephalus	3	345	1.33	0.0121	POMGNT1,HSPG2,B3GALT6
Monarch HPO	HP:0011867	Abnormal iliac wing morphology	2	64	1.88	0.0126	COL11A2,B3GALT6
Monarch HPO	HP:0000773	Short ribs	2	68	1.86	0.0141	HSPG2,COL11A2
Monarch HPO	HP:0001374	Congenital hip dislocation	2	72	1.83	0.0156	HSPG2,COL13A1
Monarch HPO	HP:0002091	Restrictive ventilatory defect	2	73	1.83	0.0160	B3GALT6,COL13A1
Monarch HPO	HP:0012758	Neurodevelopmental delay	5	1925	0.8	0.0160	EXTL3,POMGNT1,B3GALT6,COLQ,COL13A1
Monarch HPO	HP:0002996	Limited elbow movement	2	74	1.82	0.0162	EXTL3,B3GALT6
Monarch HPO	HP:0001597	Abnormality of the nail	3	393	1.27	0.0168	GJB3,COL11A2,B3GALT6
Monarch HPO	HP:0002230	Generalized hirsutism	2	78	2023-08-01	0.0177	GJB3,HSPG2
Monarch HPO	HP:0003388	Easy fatigability	2	78	2023-08-01	0.0177	COLQ,COL13A1
Monarch HPO	HP:0000467	Neck muscle weakness	2	80	1.79	0.0184	COLQ,COL13A1
Monarch HPO	HP:0002033	Poor suck	2	82	1.78	0.0192	COLQ,COL13A1
Monarch HPO	HP:0002875	Exertional dyspnea	2	83	1.77	0.0196	COLQ,COL13A1
Monarch HPO	HP:0001618	Dysphonia	2	85	1.76	0.0204	HSPG2,COL13A1
Monarch HPO	HP:0000252	Microcephaly	4	1079	0.96	0.0206	EXTL3,POMGNT1,GJB3,HSPG2
Monarch HPO	HP:0001634	Mitral valve prolapse	2	86	1.75	0.0207	EXTL3,B3GALT6
Monarch HPO	HP:0002987	Elbow flexion contracture	2	86	1.75	0.0207	EXTL3,B3GALT6
Monarch HPO	HP:0010535	Sleep apnea	2	95	1.71	0.0247	COLQ,COL13A1
Monarch HPO	HP:0002983	Micromelia	2	96	1.71	0.0251	HSPG2,COL11A2
Monarch HPO	HP:0001357	Plagiocephaly	2	97	2023-07-01	0.0255	COL11A2,B3GALT6
Monarch HPO	HP:0003510	Severe short stature	2	97	2023-07-01	0.0255	HSPG2,B3GALT6
Monarch HPO	HP:0001939	Abnormality of metabolism/homeostasis	5	2167	0.75	0.0256	EXTL3,POMGNT1,GJB3,HSPG2,COLQ
Monarch HPO	HP:0003473	Fatigable weakness	2	99	1.69	0.0263	COLQ,COL13A1
Monarch HPO	HP:0006532	Recurrent pneumonia	2	100	1.69	0.0267	EXTL3,COL11A2
Monarch HPO	HP:0000232	Everted lower lip vermilion	2	101	1.69	0.0268	POMGNT1,HSPG2
Monarch HPO	HP:0001852	Sandal gap	2	101	1.69	0.0268	COL11A2,B3GALT6
Monarch HPO	HP:0002747	Respiratory insufficiency due to muscle weakness	2	101	1.69	0.0268	COLQ,COL13A1
Monarch HPO	HP:0025423	Abnormal larynx morphology	2	104	1.67	0.0281	EXTL3,HSPG2
Monarch HPO	HP:0012443	Abnormality of brain morphology	5	2250	0.74	0.0293	EXTL3,POMGNT1,GJB3,HSPG2,B3GALT6
Monarch HPO	HP:0002089	Pulmonary hypoplasia	2	108	1.66	0.0298	HSPG2,B3GALT6
Monarch HPO	HP:0008872	Feeding difficulties in infancy	3	499	1.17	0.0298	HSPG2,COLQ,COL13A1
Monarch HPO	HP:0002084	Encephalocele	2	109	1.65	0.0303	POMGNT1,HSPG2
Monarch HPO	HP:0002515	Waddling gait	2	111	1.64	0.0309	COLQ,COL13A1
Monarch HPO	HP:0002857	Genu valgum	2	111	1.64	0.0309	HSPG2,B3GALT6
Monarch HPO	HP:0005280	Depressed nasal bridge	3	511	1.16	0.0309	EXTL3,COL11A2,B3GALT6
Monarch HPO	HP:0009768	Broad phalanges of the hand	2	111	1.64	0.0309	EXTL3,B3GALT6
Monarch HPO	HP:0000293	Full cheeks	2	113	1.64	0.0314	EXTL3,HSPG2
Monarch HPO	HP:0005918	Abnormal finger phalanx morphology	3	515	1.15	0.0314	EXTL3,COL11A2,B3GALT6
Monarch HPO	HP:0000774	Narrow chest	2	114	1.63	0.0318	HSPG2,COL11A2
Monarch HPO	HP:0002092	Pulmonary arterial hypertension	2	114	1.63	0.0318	HSPG2,COLQ
Monarch HPO	HP:0005916	Abnormal metacarpal morphology	2	117	1.62	0.0329	EXTL3,COL11A2
Monarch HPO	HP:0011355	Localized skin lesion	3	527	1.14	0.0329	POMGNT1,GJB3,B3GALT6
Monarch HPO	HP:0002804	Arthrogryposis multiplex congenita	2	122	2023-06-01	0.0353	HSPG2,COL13A1
Monarch HPO	HP:0025031	Abnormality of the digestive system	5	2389	0.71	0.0358	EXTL3,HSPG2,COL11A2,COLQ,COL13A1
Monarch HPO	HP:0000414	Bulbous nose	2	125	1.59	0.0366	EXTL3,COL11A2
Monarch HPO	HP:0003712	Skeletal muscle hypertrophy	2	133	1.57	0.0406	POMGNT1,HSPG2
Monarch HPO	HP:0000193	Bifid uvula	2	135	1.56	0.0417	POMGNT1,COL11A2
Monarch HPO	HP:0001385	Hip dysplasia	2	140	1.54	0.0441	HSPG2,B3GALT6
Monarch HPO	HP:0005922	Abnormal hand morphology	3	608	2023-08-01	0.0464	EXTL3,COL11A2,B3GALT6
Monarch HPO	HP:0001363	Craniosynostosis	2	148	1.52	0.0485	EXTL3,B3GALT6
DISEASES	DOID:17	Musculoskeletal system disease	6	1074	1.14	0.0031	POMGNT1,HSPG2,COL11A2,B3GALT6,COLQ,COL13A1
DISEASES	DOID:0050737	Autosomal recessive disease	6	1422	2023-01-01	0.0080	POMGNT1,GJB3,HSPG2,COL11A2,COLQ,COL13A1
UniProt Keywords	KW-0176	Collagen	3	82	1.95	0.0021	COL11A2,COLQ,COL13A1
UniProt Keywords	KW-9995	Disease	8	3996	0.69	0.0021	EXTL3,POMGNT1,GJB3,HSPG2,COL11A2,B3GALT6,COLQ,COL13A1
UniProt Keywords	KW-0225	Disease mutation	7	3145	0.74	0.0040	EXTL3,POMGNT1,GJB3,HSPG2,COL11A2,B3GALT6,COLQ
UniProt Keywords	KW-0735	Signal-anchor	4	444	1.34	0.0040	EXTL3,POMGNT1,B3GALT6,COL13A1
UniProt Keywords	KW-0242	Dwarfism	3	170	1.64	0.0050	EXTL3,COL11A2,B3GALT6
UniProt Keywords	KW-1004	Congenital myasthenic syndrome	2	25	2.29	0.0058	COLQ,COL13A1
UniProt Keywords	KW-0464	Manganese	3	204	1.56	0.0061	EXTL3,POMGNT1,B3GALT6
UniProt Keywords	KW-0328	Glycosyltransferase	3	226	1.51	0.0072	EXTL3,POMGNT1,B3GALT6
UniProt Keywords	KW-1015	Disulfide bond	6	3304	0.65	0.0359	EXTL3,POMGNT1,HSPG2,COL11A2,COLQ,COL13A1
